# Supplementary material
Source: PubMed Central journal article supplement (PMC10364469)
Supplement: PRO-32-e4712-s001.pdf [file PRO-32-e4712-s001.pdf]

# Supplementary Materials for

## Large library docking for novel SARS-CoV-2 main protease non-covalent and covalent inhibitors

Elissa A. Fink<sup>1,2,†</sup>, Conner Bardine<sup>1,3,†</sup>, Stefan Gahbauer<sup>1,†</sup>, Isha Singh<sup>1,†</sup>, Tyler Detomasi<sup>1</sup>, Kris White<sup>4,5</sup>, Shuo Gu<sup>1</sup>, Xiaobo Wan<sup>1</sup>, Jun Chen<sup>1</sup>, Beatrice Ary<sup>1</sup>, Isabella Glenn<sup>1</sup>, Joseph O'Connell<sup>1</sup>, Henry O'Donnell<sup>1</sup>, Pavla Fajtová<sup>6</sup>, Jiankun Lyu<sup>1</sup>, Seth Vigneron<sup>1</sup>, Nicholas J. Young<sup>1</sup>, Ivan S. Kondratov<sup>7,8</sup>, Arghavan Alisoltani<sup>9</sup>, Lacy M. Simons<sup>9</sup>, Ramon Lorenzo-Redondo<sup>9</sup>, Egon A. Ozer<sup>9</sup>, Judd F. Hultquist<sup>9</sup>, Anthony J. O'Donoghue<sup>6</sup>, Yurii Moroz<sup>10,11</sup>, Jack Taunton<sup>12</sup>, Adam R. Renslo<sup>1</sup>, John J. Irwin<sup>1</sup>, Adolfo García-Sastre<sup>4,5,13,14,15,16</sup>, Brian K. Shoichet<sup>1,16,\*</sup>, Charles S. Craik<sup>1,16,\*</sup>

† These authors contributed equally.

\* Corresponding author. Email: [bshoichet@gmail.com](mailto:bshoichet@gmail.com) (B.K.S.), [charles.craik@ucsf.edu](mailto:charles.craik@ucsf.edu) (C.S.C.)

### **This document includes:**

Tables S2 to S5  
Figures S1 to S12

### **Other Supplementary Material for this manuscript includes the following:**

Table S1 (.xlsx)

**Supplementary Table 2. Analogs of covalent docking hit '3620 with improved potencies.**

| Compound                                                                                                    | IC50 [ $\mu$ M] | Compound                                                                                                   | IC50 [ $\mu$ M] |
|-------------------------------------------------------------------------------------------------------------|-----------------|------------------------------------------------------------------------------------------------------------|-----------------|
| 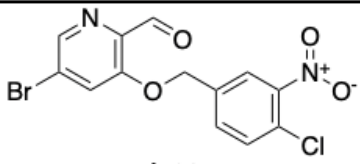 <p><b>'7021</b></p>       | 1               |  <p><b>Analog_12</b></p> | 22              |
|  <p><b>'6690</b></p>       | 2               |  <p><b>Analog_20</b></p> | 22              |
|  <p><b>'7013</b></p>       | 5               |  <p><b>'9037</b></p>     | 23              |
|  <p><b>Analog_18</b></p>  | 6               |  <p><b>'4202</b></p>    | 24              |
|  <p><b>'8252</b></p>     | 6               |  <p><b>'9125</b></p>   | 25              |
|  <p><b>'6117</b></p>     | 7               |  <p><b>'7356</b></p>   | 26              |
|  <p><b>Analog_19</b></p> | 9               |  <p><b>'8474</b></p>   | 27              |

|                                                                                                             |    |                                                                                                              |    |
|-------------------------------------------------------------------------------------------------------------|----|--------------------------------------------------------------------------------------------------------------|----|
| 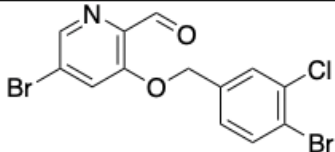 <p><b>'4217</b></p>       | 9  |  <p><b>'0481</b></p>       | 27 |
|  <p><b>'9033</b></p>       | 9  |  <p><b>Analog_7</b></p>    | 28 |
|  <p><b>'9122</b></p>       | 9  |  <p><b>Analog_8</b></p>    | 33 |
|  <p><b>Analog_17</b></p>  | 11 |  <p><b>Analog_10</b></p>  | 34 |
|  <p><b>Analog_6</b></p>  | 12 |  <p><b>Analog_11</b></p> | 35 |
|  <p><b>Analog_49</b></p> | 13 |  <p><b>'9009</b></p>     | 38 |
|  <p><b>'0156</b></p>     | 14 |  <p><b>'3251</b></p>     | 40 |

|                                                                                                         |    |                                                                                                            |    |
|---------------------------------------------------------------------------------------------------------|----|------------------------------------------------------------------------------------------------------------|----|
| 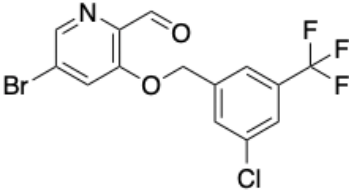 <p><b>'9028</b></p>   | 14 |  <p><b>'3250</b></p>     | 40 |
|  <p><b>'4221</b></p>   | 19 |  <p><b>Analog_21</b></p> | 43 |
|  <p><b>'3264</b></p>   | 20 |  <p><b>'3252</b></p>     | 45 |
|  <p><b>'4212</b></p> | 20 |  <p><b>'3564</b></p>   | 48 |

**Supplementary Table 3. Antiviral activities.**

| Compound     | Antiviral IC <sub>50</sub> <sup>a</sup> [μM] | Antiviral IC <sub>90</sub> <sup>a</sup> [μM] | CC <sub>10</sub> <sup>b</sup> [μM] |
|--------------|----------------------------------------------|----------------------------------------------|------------------------------------|
| <b>'7021</b> | 6.2                                          | 7.3                                          | 8.03                               |
| <b>'7356</b> | 19.53                                        | 19.9                                         | 6.93                               |

<sup>a</sup> Efficacy in RT-qPCR viral infectivity assay in X cells.

<sup>b</sup> Reduction in cell viability (cytotoxicity).

**Supplementary Table 4. Pan-viral enzymatic activities of '7021.**

| Viral M <sup>Pro</sup> | IC50 [ $\mu$ M] |
|------------------------|-----------------|
| MERS                   | 50              |
| SARS-CoV-1             | 8               |
| SARS-CoV-2             | 1               |

**Supplementary Table 5. Crystallographic statistics.**

| Ligand                         | '5548                       | '7356                       | '6111                       | SG-0001                    | '9121                       | '7021                       | '8252                      | '9218                     |
|--------------------------------|-----------------------------|-----------------------------|-----------------------------|----------------------------|-----------------------------|-----------------------------|----------------------------|---------------------------|
| PDB ID                         | 8DIG                        | 8DIF                        | 8DIH                        | 8DII                       | 8DIC                        | 8DIB                        | 8DID                       | 8DIE                      |
| Resolution range (Å)           | 72.62 - 2.45 (2.538 - 2.45) | 48.44 - 1.98 (2.051 - 1.98) | 44.39 - 2.12 (2.196 - 2.12) | 48.6 - 2.59 (2.683 - 2.59) | 38.13 - 2.09 (2.165 - 2.09) | 38.73 - 2.17 (2.248 - 2.17) | 38.22 - 1.95 (2.02 - 1.95) | 38.64 - 1.9 (1.968 - 1.9) |
| Space group                    | P 21 21 21                  | P 1 21 1                    | C 1 2 1                     | I 1 2 1                    | P 1 21 1                    | P 1 21 1                    | P 1 21 1                   | P 1 21 1                  |
| a, b, c (Å)                    | 67.779, 102.704, 102.704    | 44.897, 53.624, 115.04      | 114.102, 53.917, 45.258     | 45.041, 53.835, 115.11     | 44.346, 53.814, 115.824     | 44.911, 53.72, 115.527      | 44.238, 53.666, 115.632    | 44.923, 53.751, 115.119   |
| a, b, c (°)                    | 90, 90, 90                  | 90, 101.151, 90             | 90, 101.253, 90             | 90, 101.13, 90             | 90, 100.459, 90             | 90, 100.833, 90             | 90, 100.938, 90            | 90, 101.062, 90           |
| Total reflections              | 52786 (4222)                | 74588 (6993)                | 29895 (2343)                | 17080 (1724)               | 63019 (6332)                | 56799 (5689)                | 76834 (7688)               | 83998 (8382)              |
| Unique reflections             | 26433 (2151)                | 37368 (3516)                | 14998 (1188)                | 8552 (864)                 | 31556 (3170)                | 28435 (2848)                | 38463 (3848)               | 42036 (4194)              |
| Multiplicity                   | 2.0 (2.0)                   | 2.0 (2.0)                   | 2.0 (2.0)                   | 2.0 (2.0)                  | 2.0 (2.0)                   | 2.0 (2.0)                   | 2.0 (2.0)                  | 2.0 (2.0)                 |
| Completeness (%)               | 97.69 (80.05)               | 99.03 (92.87)               | 96.99 (77.24)               | 99.74 (99.77)              | 98.17 (98.84)               | 98.18 (98.41)               | 98.14 (98.54)              | 94.67 (79.45)             |
| Mean I/sigma(I)                | 10.82 (1.33)                | 13.42 (1.00)                | 19.51 (1.83)                | 8.81 (0.84)                | 8.94 (0.98)                 | 8.68 (0.89)                 | 7.58 (0.98)                | 4.57 (0.59)               |
| Wilson B-factor                | 44.04                       | 36.71                       | 48.65                       | 56.27                      | 39.01                       | 40.42                       | 30.04                      | 33.18                     |
| R-merge                        | 0.05895 (0.6349)            | 0.0362 (0.8374)             | 0.01881 (0.4432)            | 0.06999 (0.9217)           | 0.05198 (0.7831)            | 0.05847 (0.8779)            | 0.05816 (0.7736)           | 0.1022 (1.824)            |
| R-meas                         | 0.08337 (0.8979)            | 0.0512 (1.184)              | 0.0266 (0.6267)             | 0.09899 (1.304)            | 0.07351 (1.107)             | 0.08269 (1.242)             | 0.08226 (1.094)            | 0.1446 (2.579)            |
| R-pim                          | 0.05895 (0.6349)            | 0.0362 (0.8374)             | 0.01881 (0.4432)            | 0.06999 (0.9217)           | 0.05198 (0.7831)            | 0.05847 (0.8779)            | 0.05816 (0.7736)           | 0.1022 (1.824)            |
| CC1/2                          | 0.997 (0.513)               | 1 (0.41)                    | 1 (0.625)                   | 0.995 (0.333)              | 0.999 (0.474)               | 0.998 (0.397)               | 0.998 (0.513)              | 0.993 (0.201)             |
| CC*                            | 0.999 (0.823)               | 1 (0.763)                   | 1 (0.877)                   | 0.999 (0.707)              | 1 (0.802)                   | 1 (0.754)                   | 1 (0.823)                  | 0.998 (0.579)             |
| <b>Refinement</b>              |                             |                             |                             |                            |                             |                             |                            |                           |
| Reflections used in refinement | 26397 (2118)                | 37312 (3502)                | 14996 (1188)                | 8548 (862)                 | 31513 (3163)                | 28394 (2844)                | 38390 (3844)               | 40479 (3371)              |
| Reflections used for R-free    | 1317 (116)                  | 1835 (176)                  | 723 (54)                    | 419 (45)                   | 1615 (173)                  | 1341 (143)                  | 1894 (224)                 | 2128 (174)                |
| R-work                         | 0.2138 (0.3321)             | 0.2432 (0.3608)             | 0.2114 (0.3256)             | 0.2164 (0.3640)            | 0.2275 (0.3419)             | 0.2267 (0.3265)             | 0.2574 (0.3563)            | 0.2534 (0.3559)           |
| R-free                         | 0.2717 (0.3771)             | 0.2955 (0.3532)             | 0.2760 (0.3358)             | 0.2672 (0.3837)            | 0.2764 (0.3772)             | 0.2814 (0.3331)             | 0.2915 (0.4119)            | 0.3032 (0.3935)           |
| CC(work)                       | 0.954 (0.748)               | 0.957 (0.639)               | 0.964 (0.698)               | 0.957 (0.515)              | 0.959 (0.639)               | 0.962 (0.651)               | 0.954 (0.698)              | 0.953 (0.502)             |
| CC(free)                       | 0.922 (0.479)               | 0.953 (0.613)               | 0.963 (0.738)               | 0.947 (0.420)              | 0.932 (0.465)               | 0.955 (0.574)               | 0.948 (0.514)              | 0.916 (0.400)             |
| Number of non-hydrogen atoms   | 4589                        | 4365                        | 2317                        | 2347                       | 4502                        | 4579                        | 4531                       | 4604                      |
| macromolecules                 | 4540                        | 4269                        | 2267                        | 2310                       | 4433                        | 4506                        | 4413                       | 4509                      |
| ligands                        | 25                          | 42                          | 25                          | 25                         | 38                          | 42                          | 38                         | 42                        |
| solvent                        | 24                          | 54                          | 25                          | 12                         | 31                          | 31                          | 80                         | 53                        |
| Protein residues               | 601                         | 585                         | 303                         | 303                        | 599                         | 599                         | 591                        | 605                       |
| RMS(bonds)                     | 0.008                       | 0.01                        | 0.008                       | 0.002                      | 0.009                       | 0.004                       | 0.015                      | 0.009                     |
| RMS(angles)                    | 0.94                        | 0.99                        | 1.01                        | 0.57                       | 0.98                        | 0.7                         | 1.14                       | 0.92                      |
| Ramachandran favored (%)       | 94.76                       | 97.68                       | 96.62                       | 96.66                      | 97.23                       | 98.11                       | 97.33                      | 97.45                     |
| Ramachandran allowed (%)       | 5.24                        | 2.32                        | 3.38                        | 3.34                       | 2.6                         | 1.72                        | 2.49                       | 2.38                      |
| Ramachandran outliers (%)      | 0                           | 0                           | 0                           | 0                          | 0.17                        | 0.17                        | 0.18                       | 0.17                      |
| Rotamer outliers (%)           | 0                           | 0.23                        | 0                           | 0                          | 0.43                        | 0                           | 0.21                       | 0                         |
| Clashscore                     | 7.5                         | 3.99                        | 4.71                        | 5.48                       | 6.71                        | 3.84                        | 8.22                       | 5.1                       |



|                  |       |       |       |        |       |       |       |       |
|------------------|-------|-------|-------|--------|-------|-------|-------|-------|
| Average B-factor | 49.4  | 40.26 | 56.53 | 63.66  | 44.1  | 48.58 | 33.91 | 37.93 |
| macromolecules   | 49.35 | 40.11 | 56.35 | 63.09  | 43.98 | 48.12 | 33.78 | 37.84 |
| ligands          | 60.21 | 54.15 | 73.4  | 122.98 | 61.63 | 99.97 | 55.66 | 50.55 |
| solvent          | 48.32 | 41.14 | 55.62 | 49.68  | 39.64 | 46.39 | 30.93 | 35.8  |

(One crystal for each structure)

\* Values in parentheses are for the highest-resolution shell.

**A**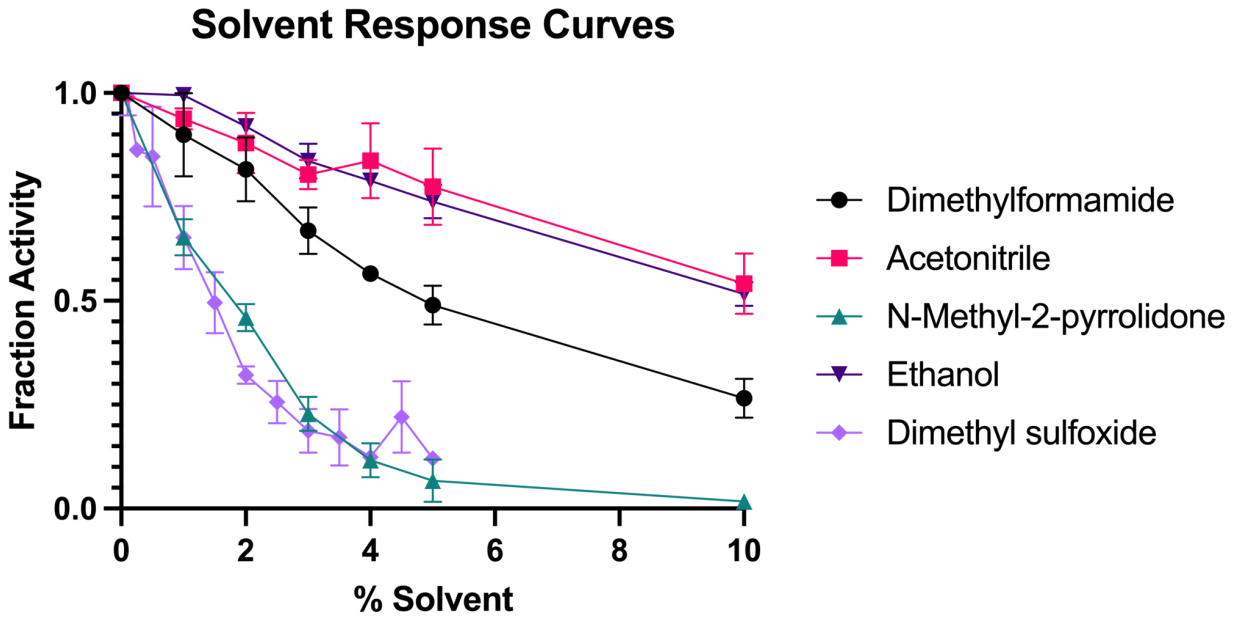**B**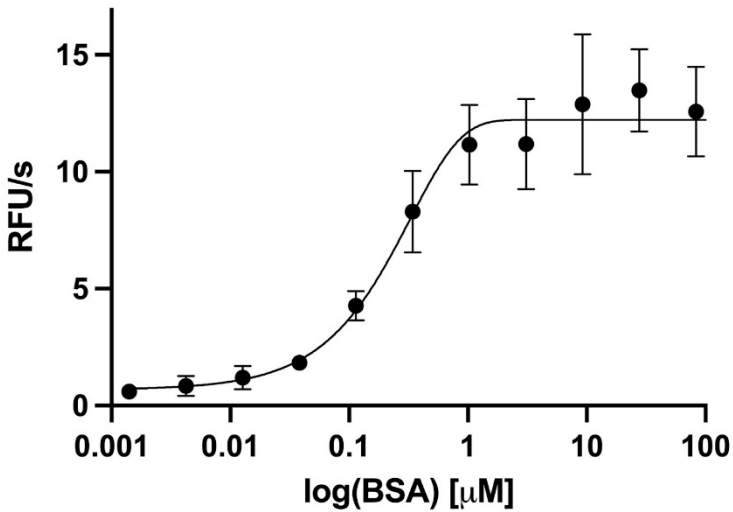

**Supplementary Figure 1. Assay optimization for solvent and detergent. (A)** The effect of solvents on enzymatic activity of M<sup>Pro</sup>. **(B)** Activity loss from removal of detergent rescued with addition of BSA.

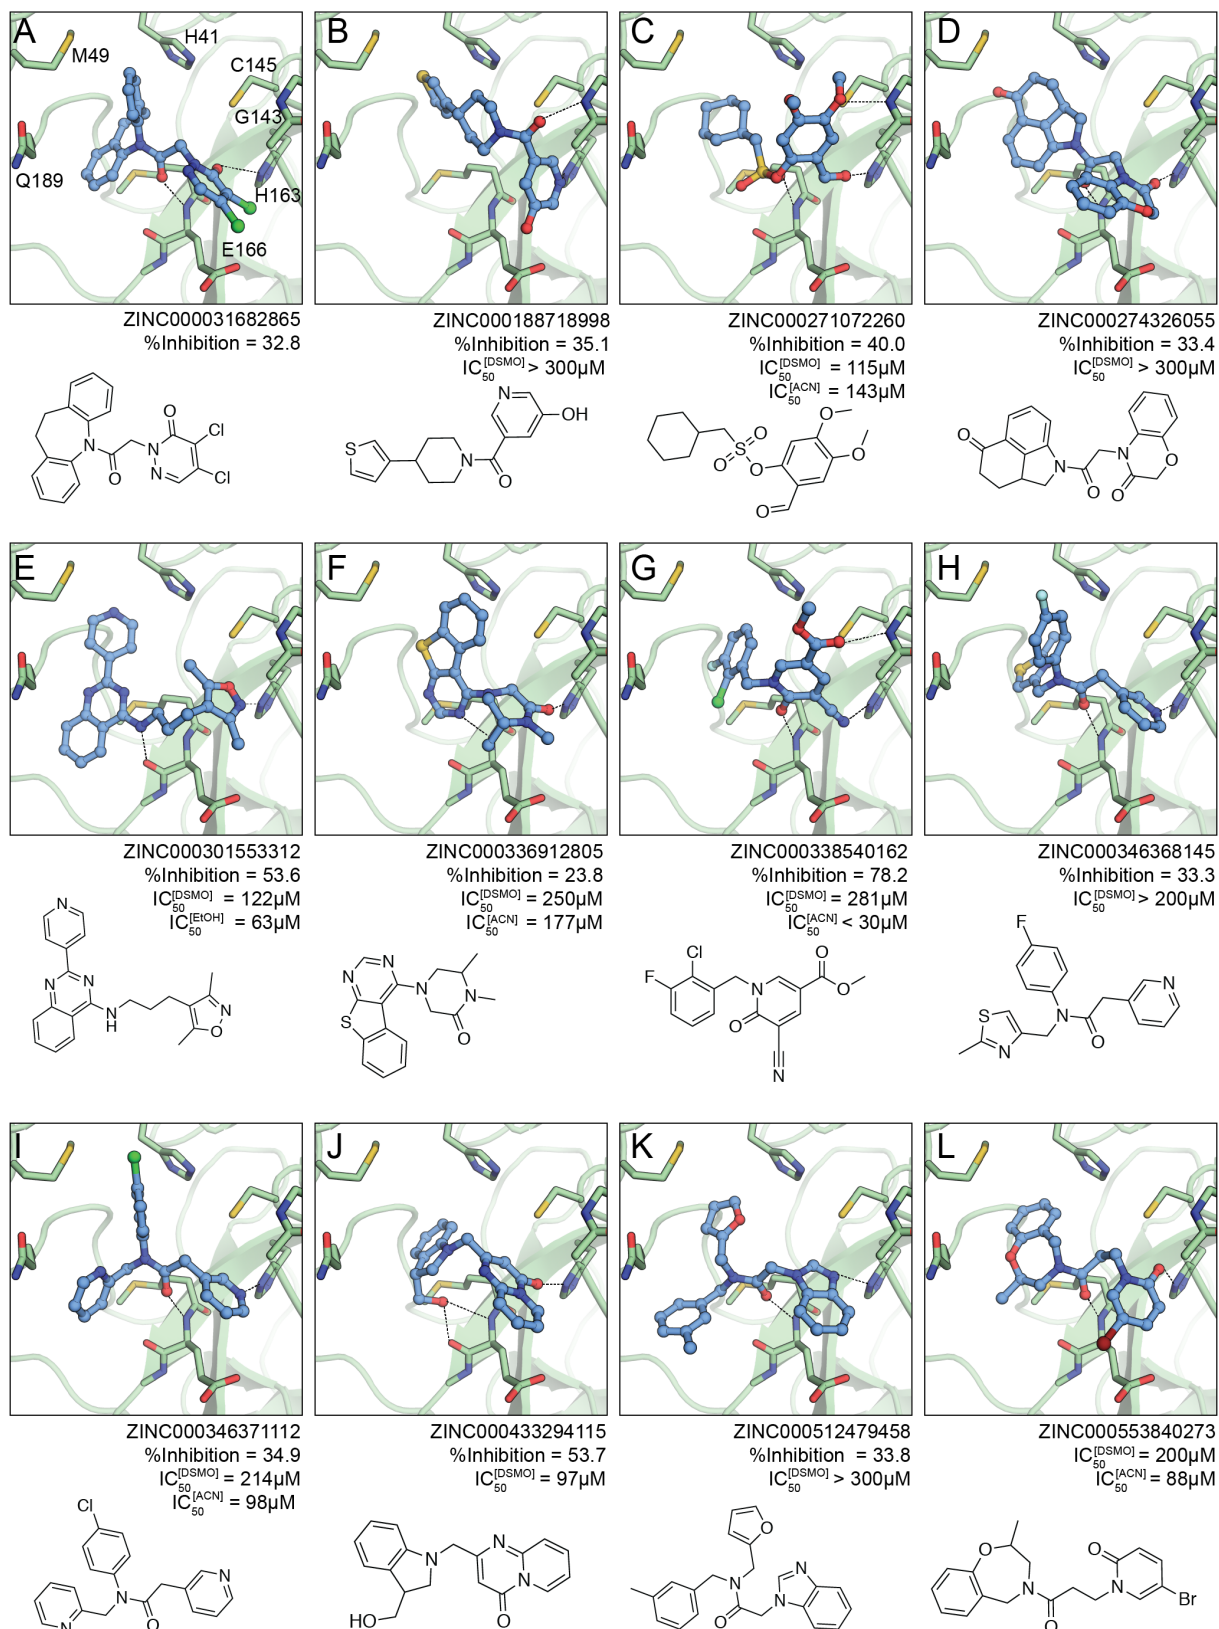

**Supplementary Figure 2.1 Non-covalent docking hits or compounds with >30% inhibition from first virtual screen.**

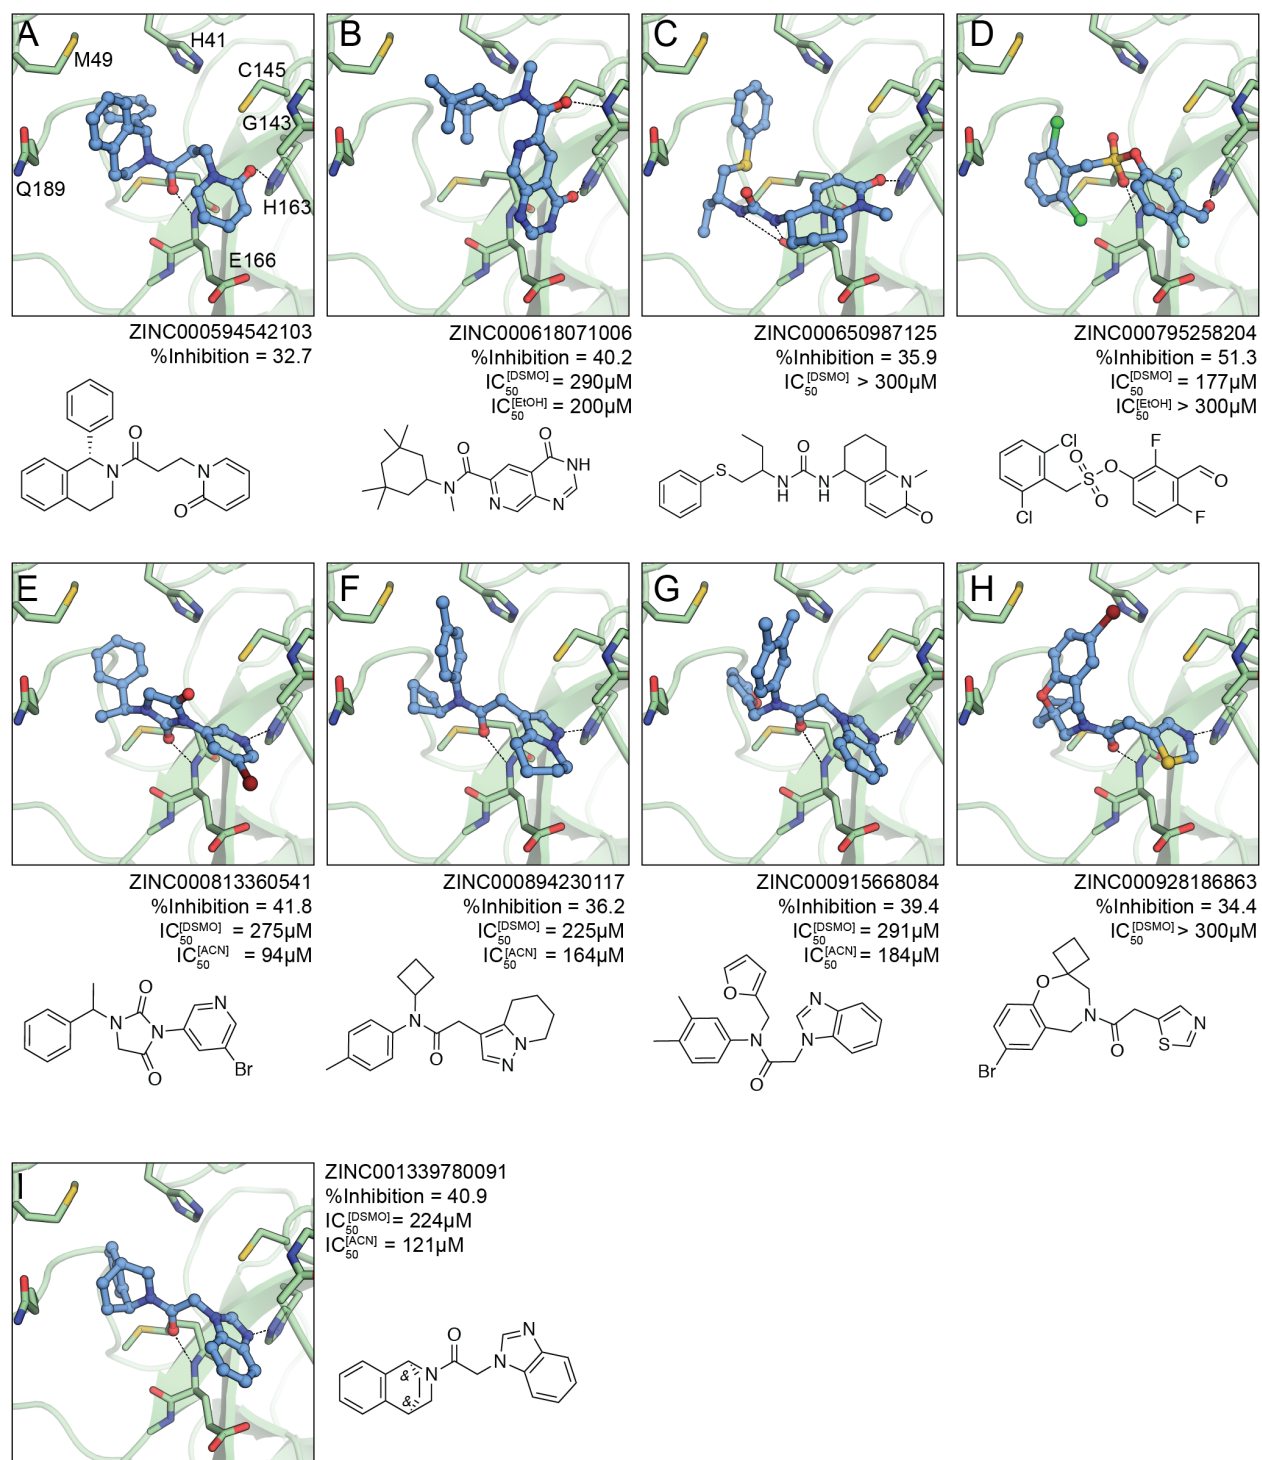

**Supplementary Figure 2.2 Non-covalent docking hits or compounds with >30% inhibition from first virtual screen.**

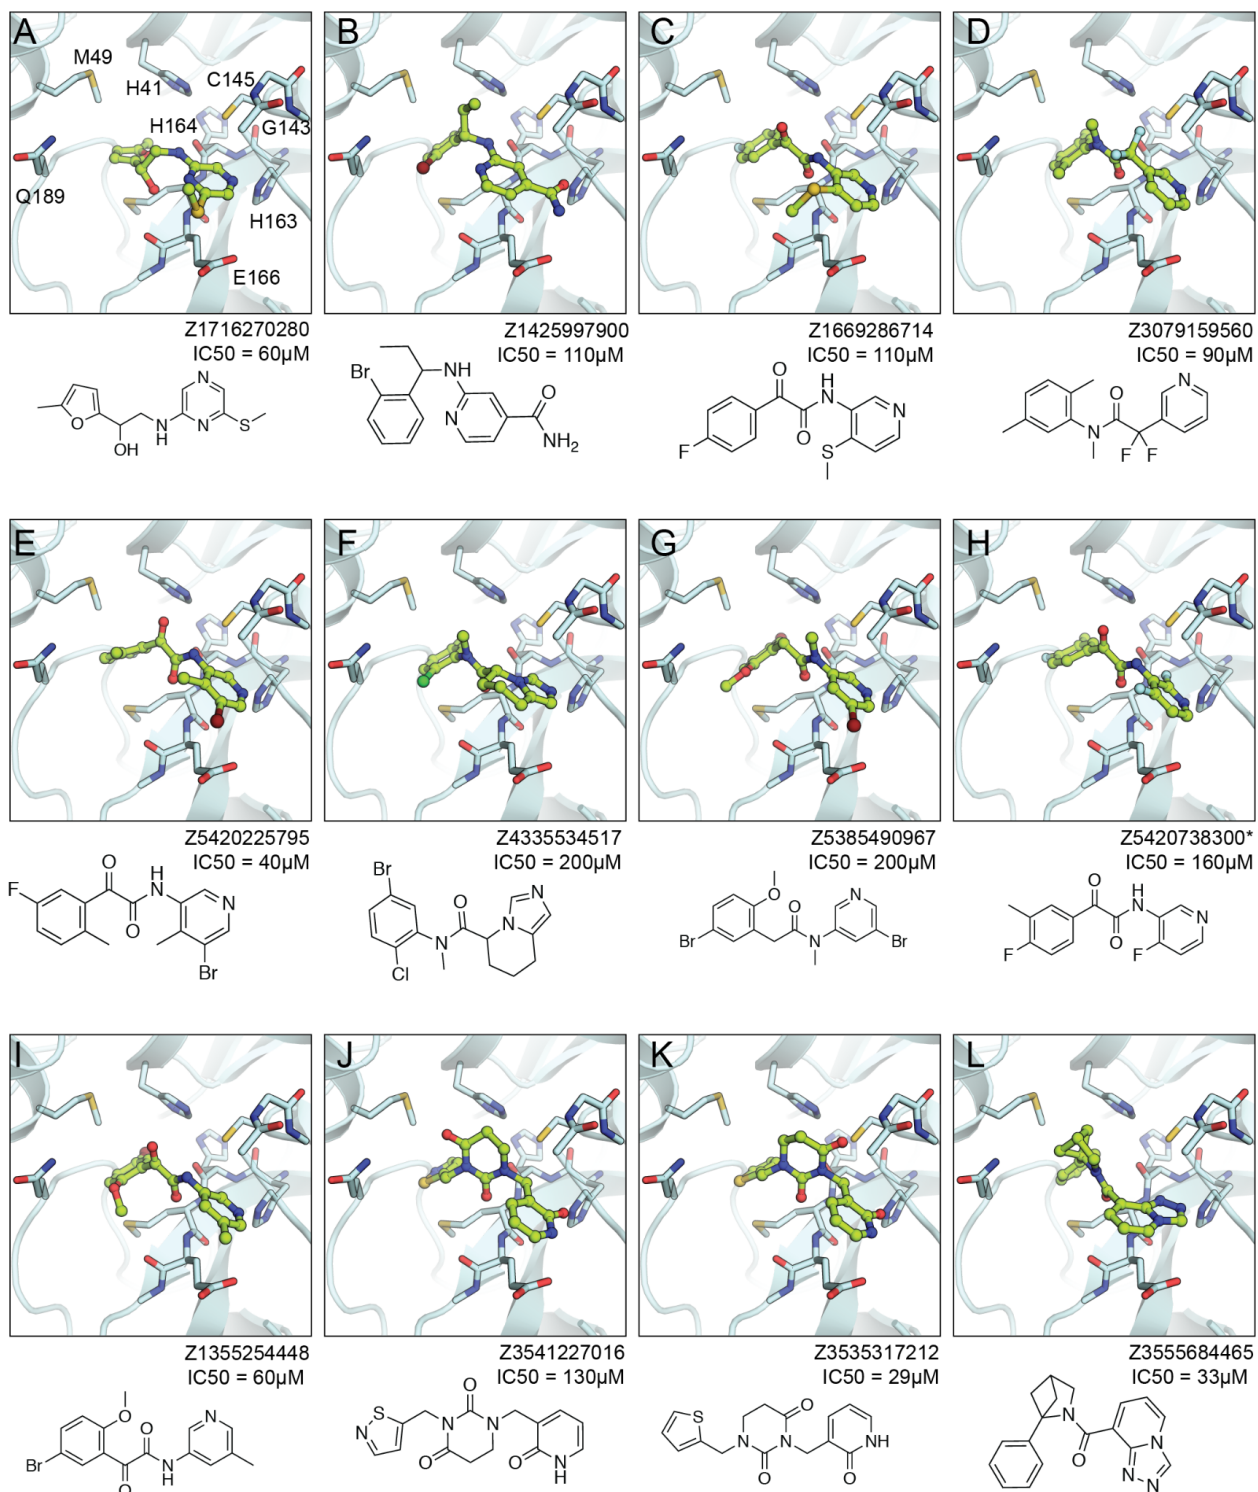

**Supplementary Figure 2.3 Non-covalent docking hits from second virtual screen.**

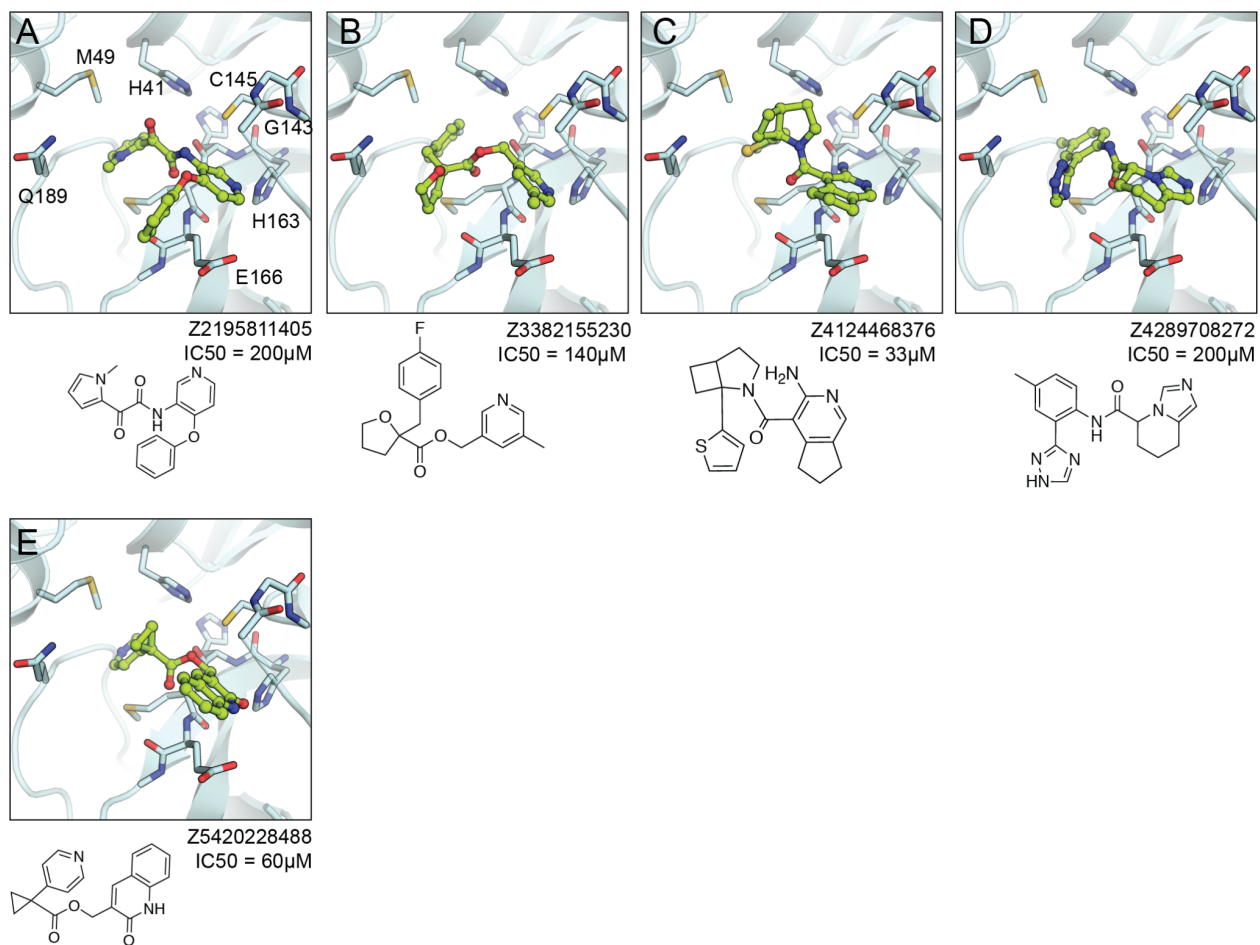

**Supplementary Figure 2.4 Non-covalent docking hits from second virtual screen.**

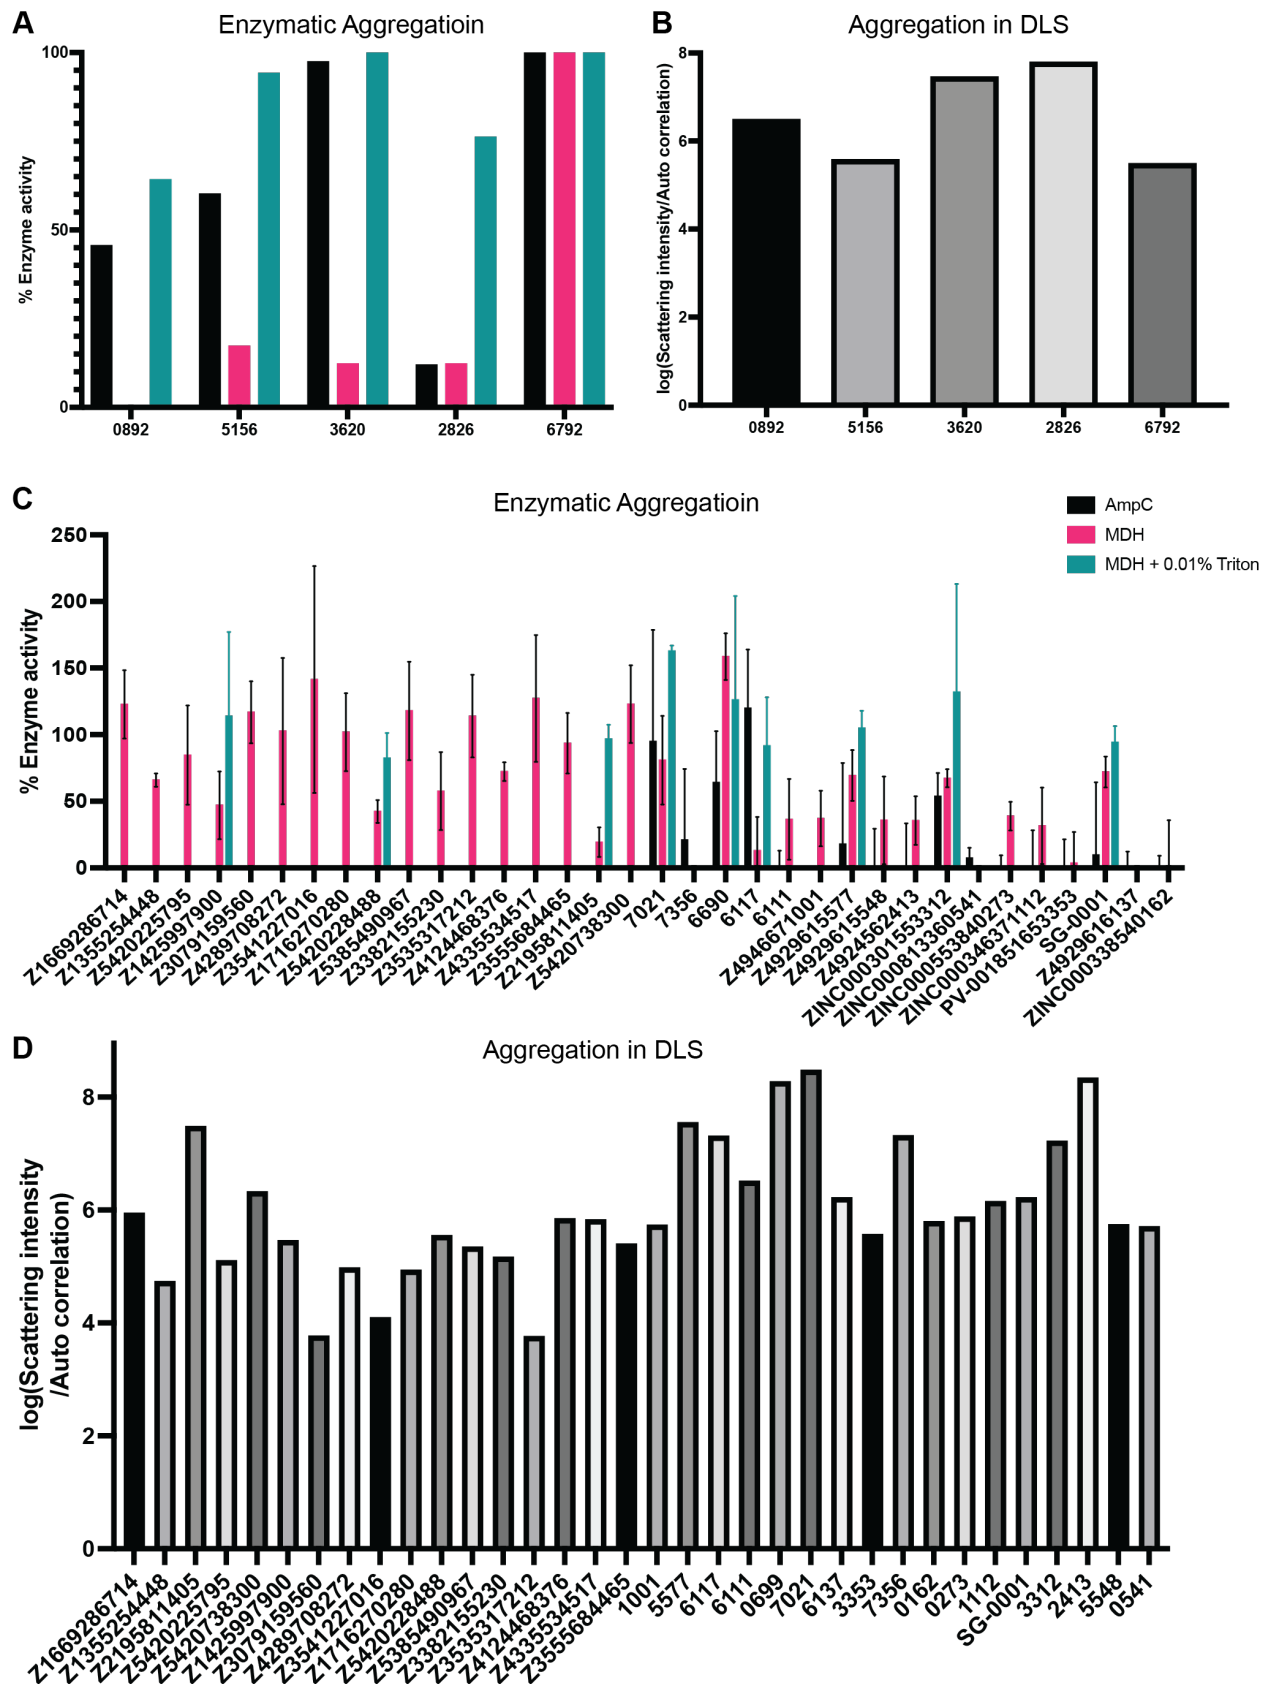

**Supplementary Figure 3. Evaluating aggregation potential of initial docking hits and potent analogs.** (A,C) Enzymatic inhibition by aggregation tested against AmpC and MDH (with or without 0.01% Triton X-100 detergent). (B,D) Compounds observed in DLS for forming colloidal-like particles where values above  $10^6$  have the potential for aggregating.



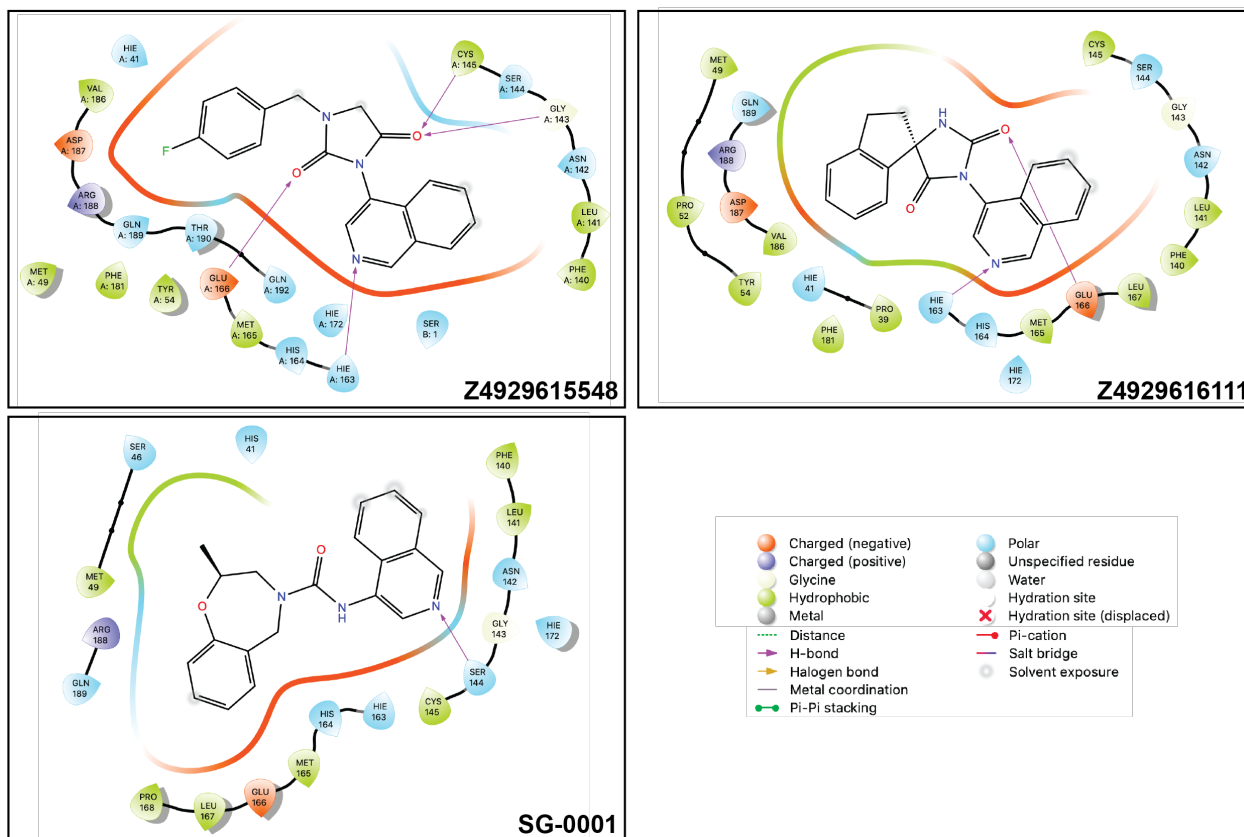

Supplementary Figure 4. LigPlot visualization of M<sup>Pro</sup>-noncovalent inhibitor interactions in newly solved structures.

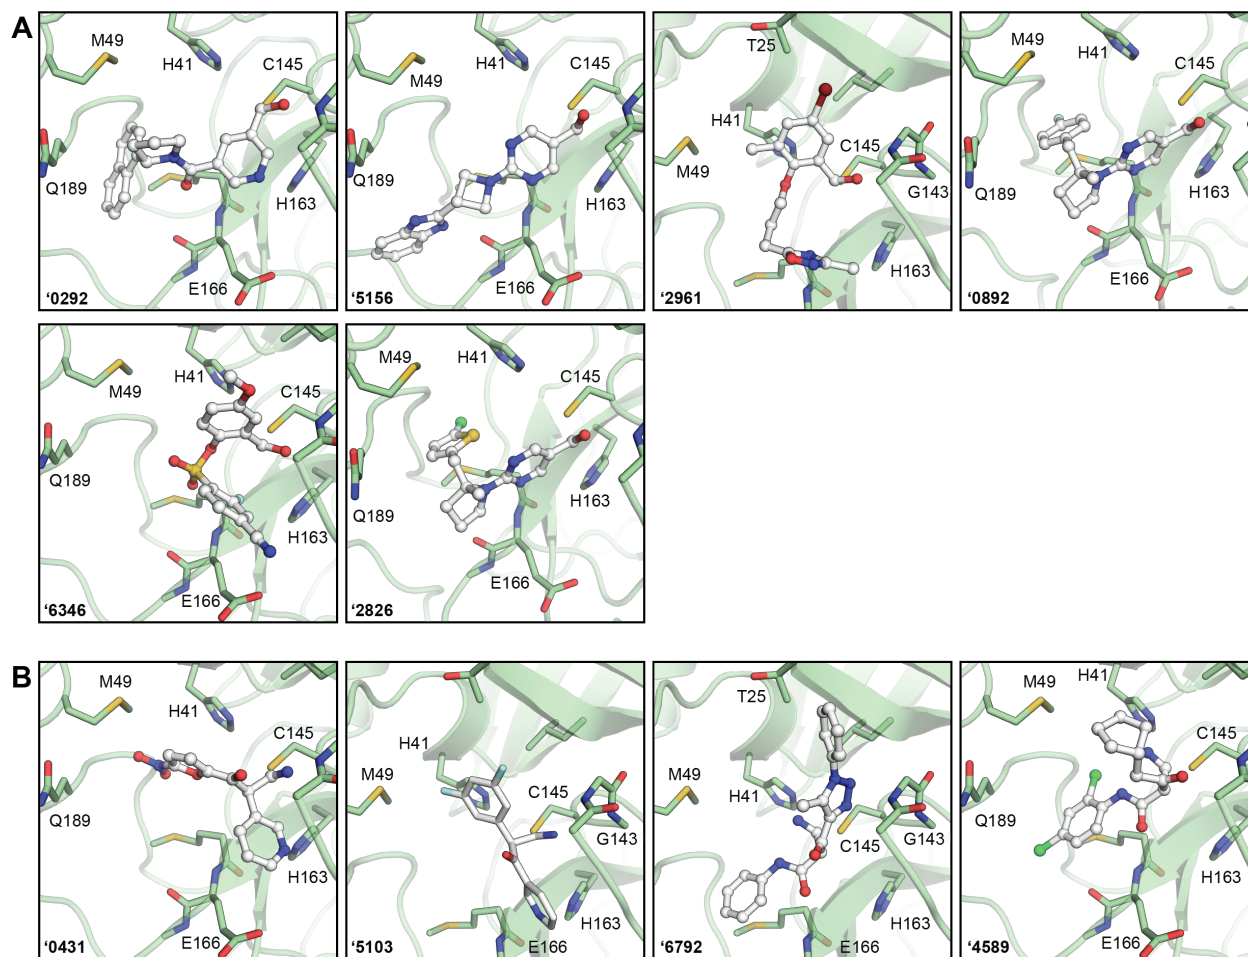

**Supplementary Figure 5. Docked poses of covalent hits. (A) Aldehydes. (B) Nitriles.** Covalent bonds between the warhead and Cys145 and not explicitly modeled in docking.

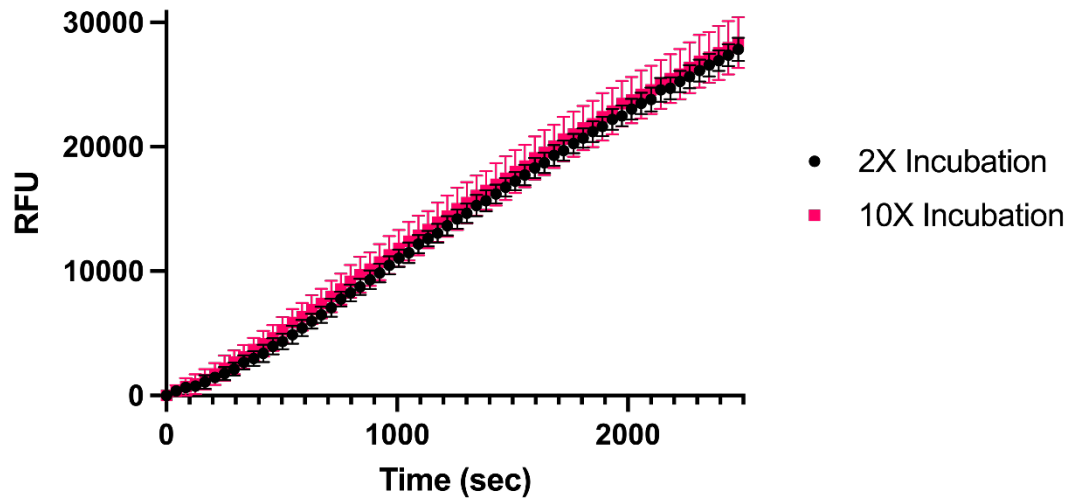

**Supplementary Figure 6. Reversibility of compound '7021.** Both 2X and 10X concentrations of enzyme and '7021 inhibitor were co-incubated for 1-hour. By Le Chatelier's principle, the 10X incubation should lead to more inhibited enzyme product. Both 2X and 10X incubations were diluted to 1X concentrations with final substrate concentration of 1X NSP7. Both co-incubations yielded the same velocity, evincing concentration dependent diffusion of the enzyme-inhibitor complex, thus evincing the reversibility of the '7021 compound.

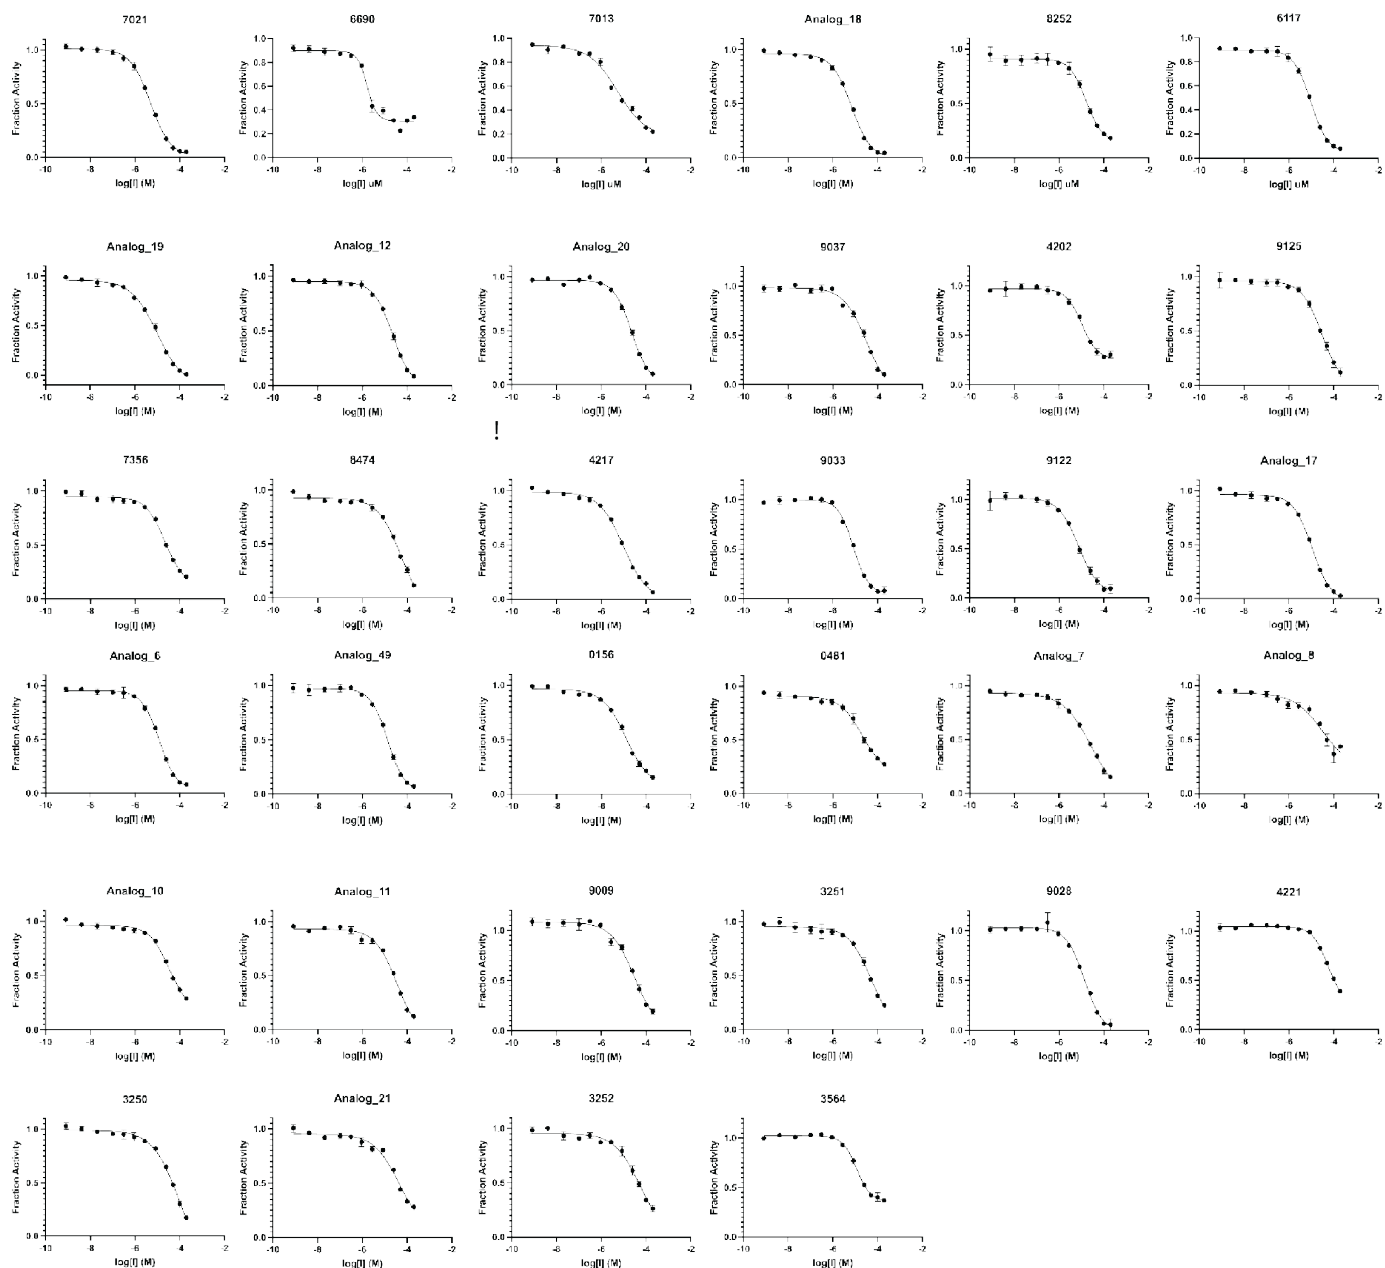

**Supplementary Figure 7. '3620 analogs with improved potencies. IC<sub>50</sub> values in Table S2.**

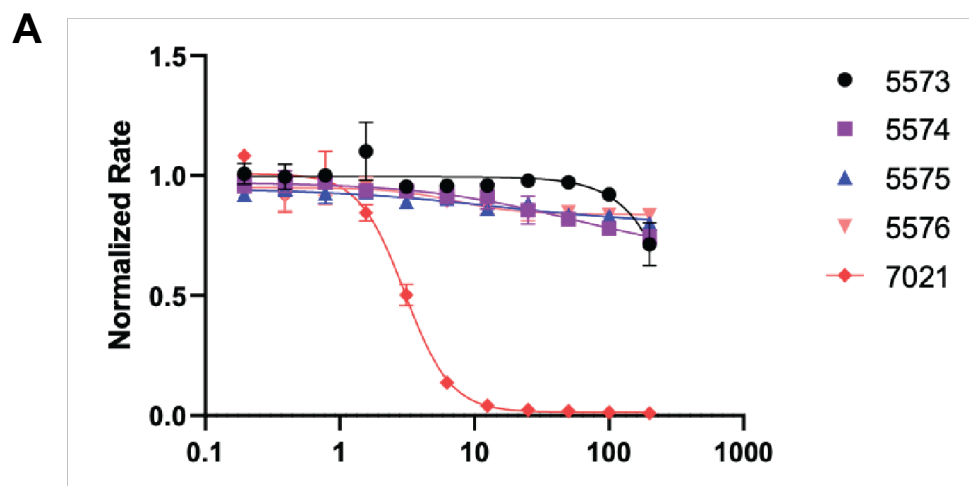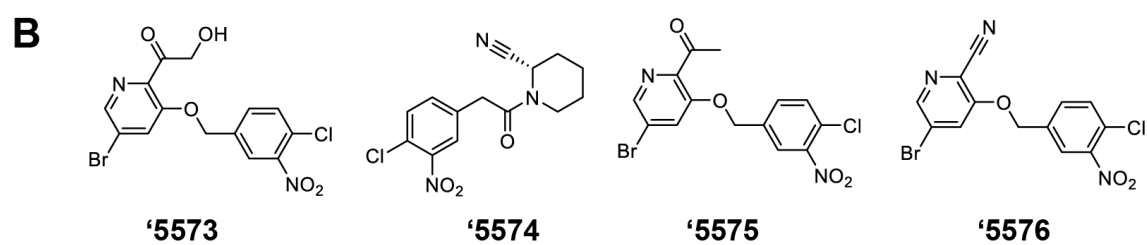

**Supplementary Figure 8. '7021 analogs with different electrophiles did not inhibit  $M^{Pro}$ .**

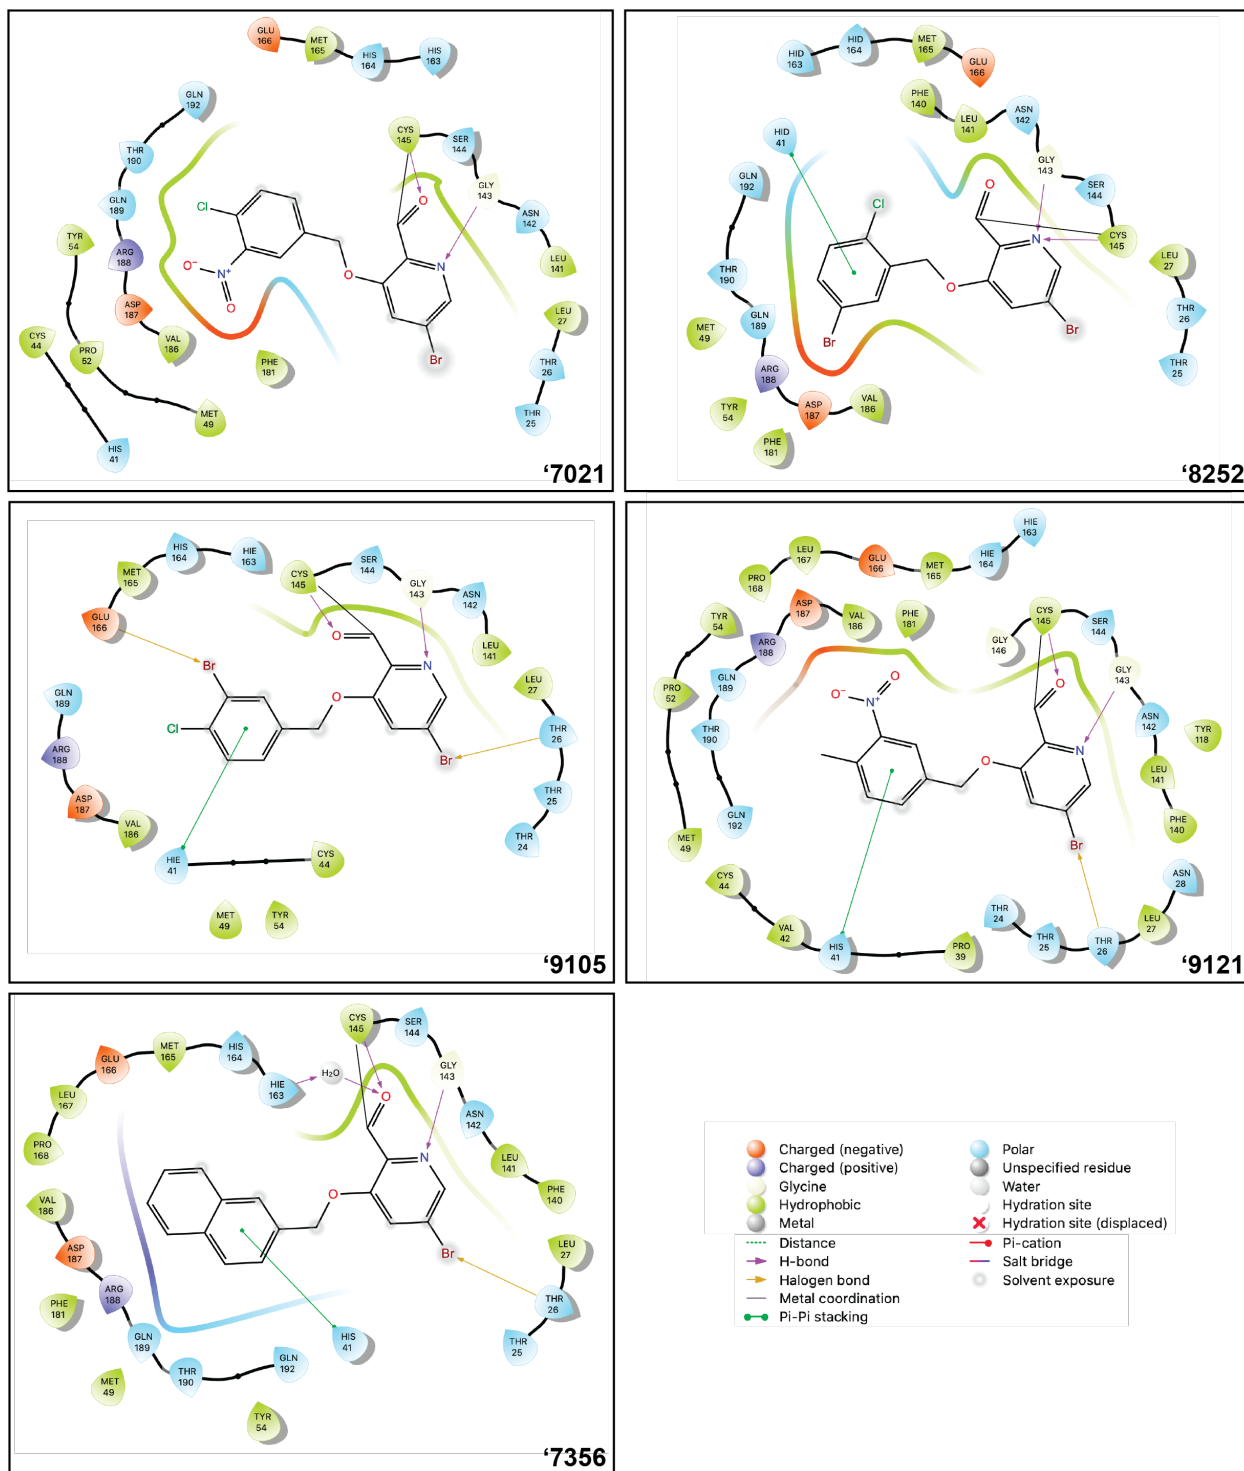

**Supplementary Figure 9. LigPlot visualization of M<sup>Pro</sup>-covalent inhibitor interactions in newly solved structures.**

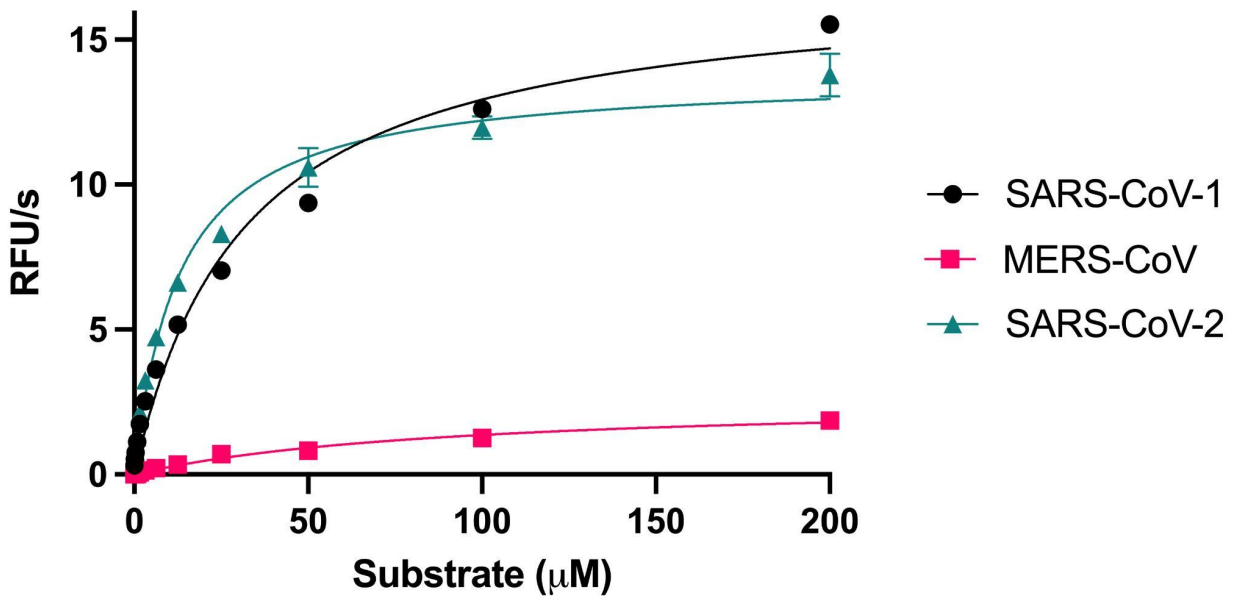

**Supplementary Figure 10. Pan-viral enzymatic activities.** Michaelis-Menten kinetics were ran side-by-side with the optimized NSP7 substrate for SARS-CoV-2 (green), SARS-CoV-1 (black), and MERS (red) major proteases.  $K_M$  values were found to be  $12\mu\text{M}$ ,  $30\mu\text{M}$ , and  $90\mu\text{M}$  for SARS-CoV-2, SARS-CoV-1, and MERS, respectively. All proceeding inhibitory assays were ran with  $K_M$  concentrations of substrate.

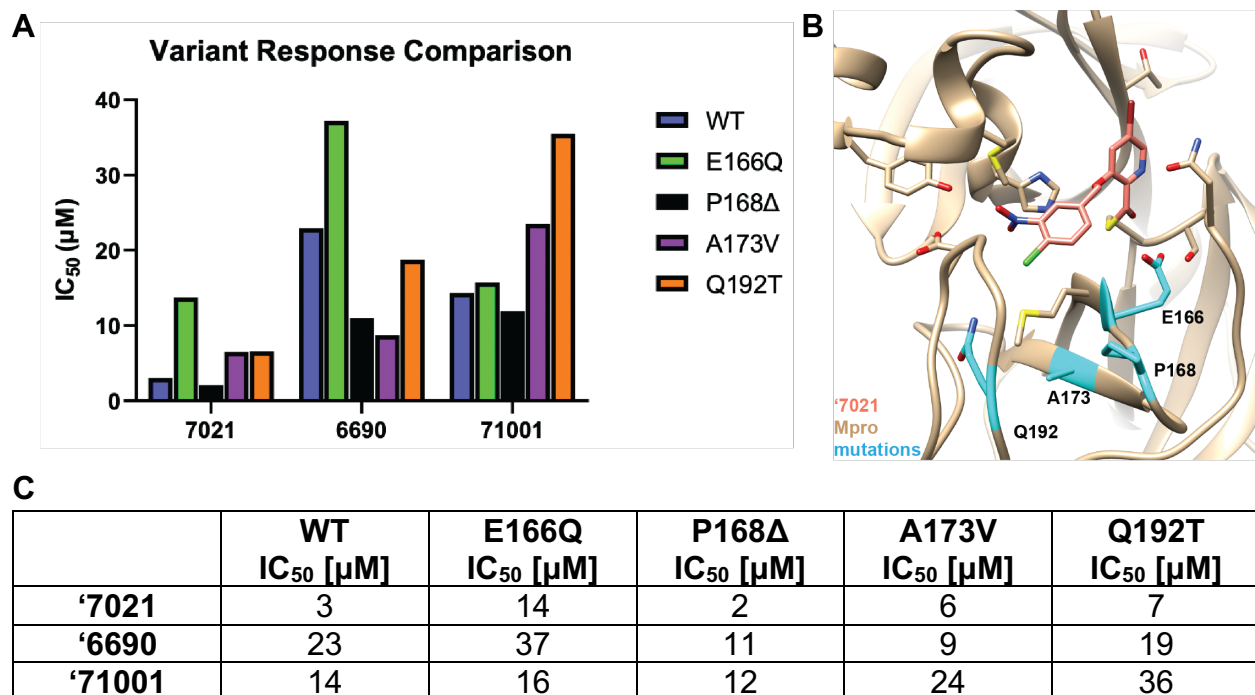

**Supplementary Figure 11. Compound activities against mutant SARS-CoV-2 M<sup>Pro</sup>.** (A, C) IC<sub>50</sub> values for '7021, '6690, and '71001 against a panel of M<sup>Pro</sup> mutants. (B) Mutations (blue carbons) shown on the '7021 SARS-CoV-2 M<sup>Pro</sup> crystal structure. WT, wildtype. All measurements were done in triplicate.



MaxPeak: 100.00%  
Ret\_Time: 0.954 min

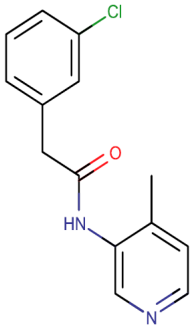

**Mol Wt** 260.72  
**Exact Mass** 260.09

| # | Time  | Area%  |
|---|-------|--------|
| 1 | 0.954 | 100.00 |

Q216097\$2

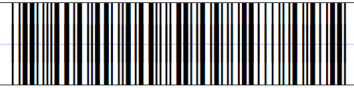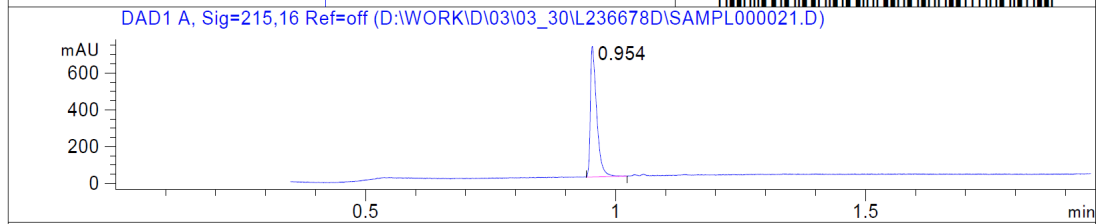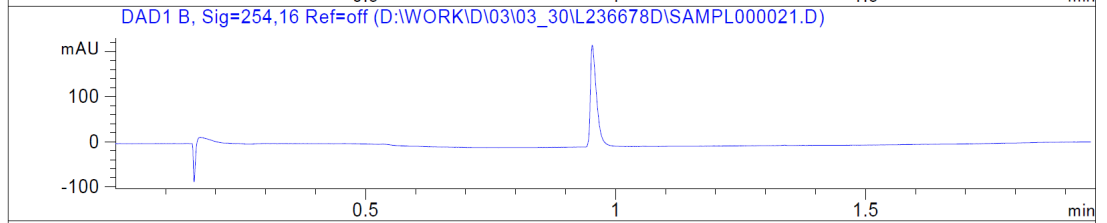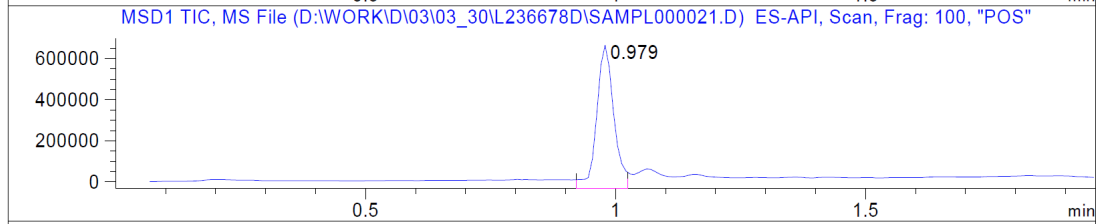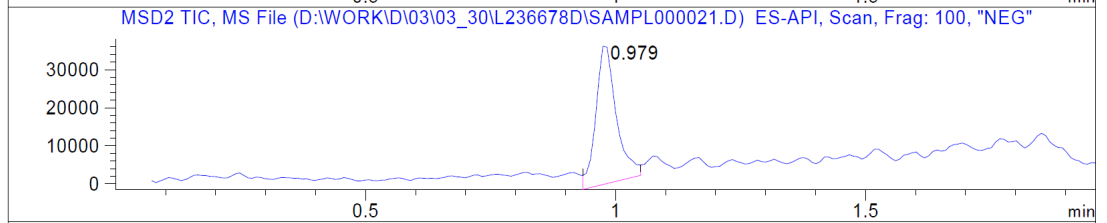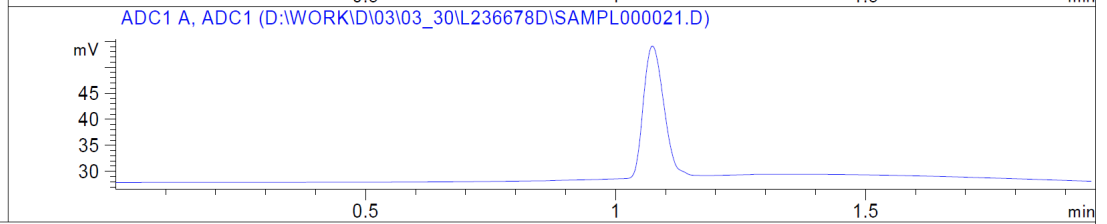

RT 0.979

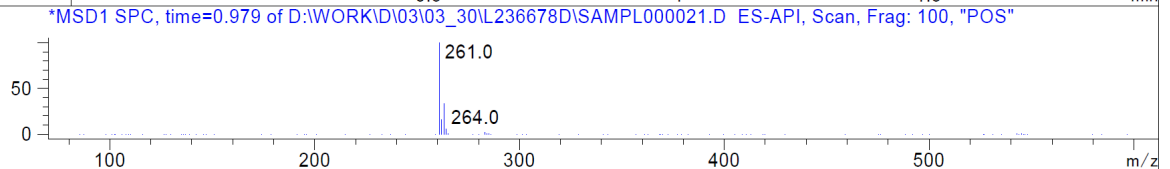

RT 0.979

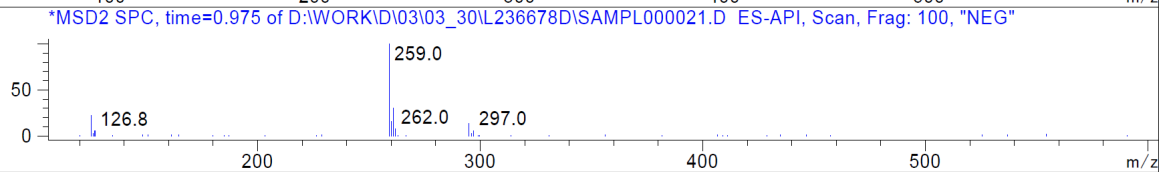

Z1129289650

Z1129289650

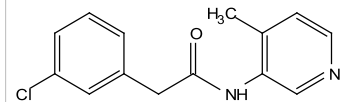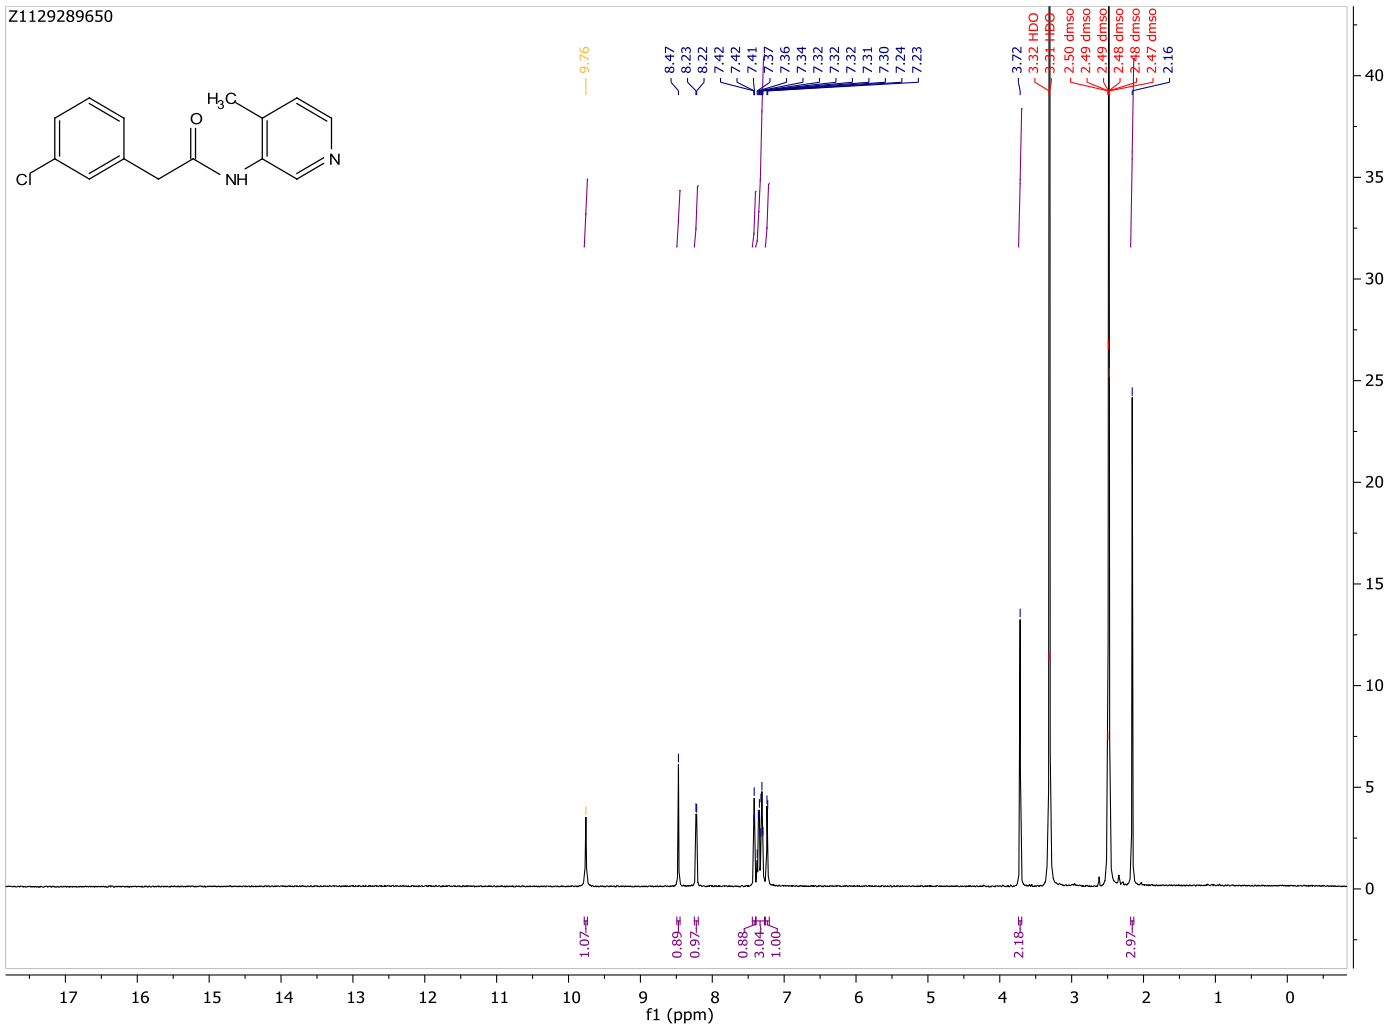

Q272221\$1

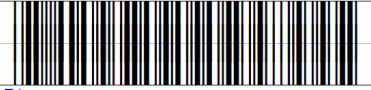

MaxPeak: 100.00%  
Ret\_Time: 0.887 min

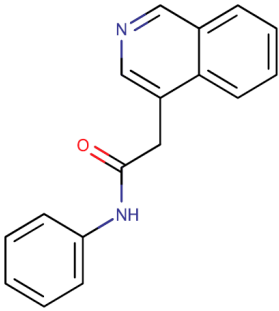

Mol Wt 262.31  
Exact Mass 262.13

| # | Time  | Area%  |
|---|-------|--------|
| 1 | 0.887 | 100.00 |

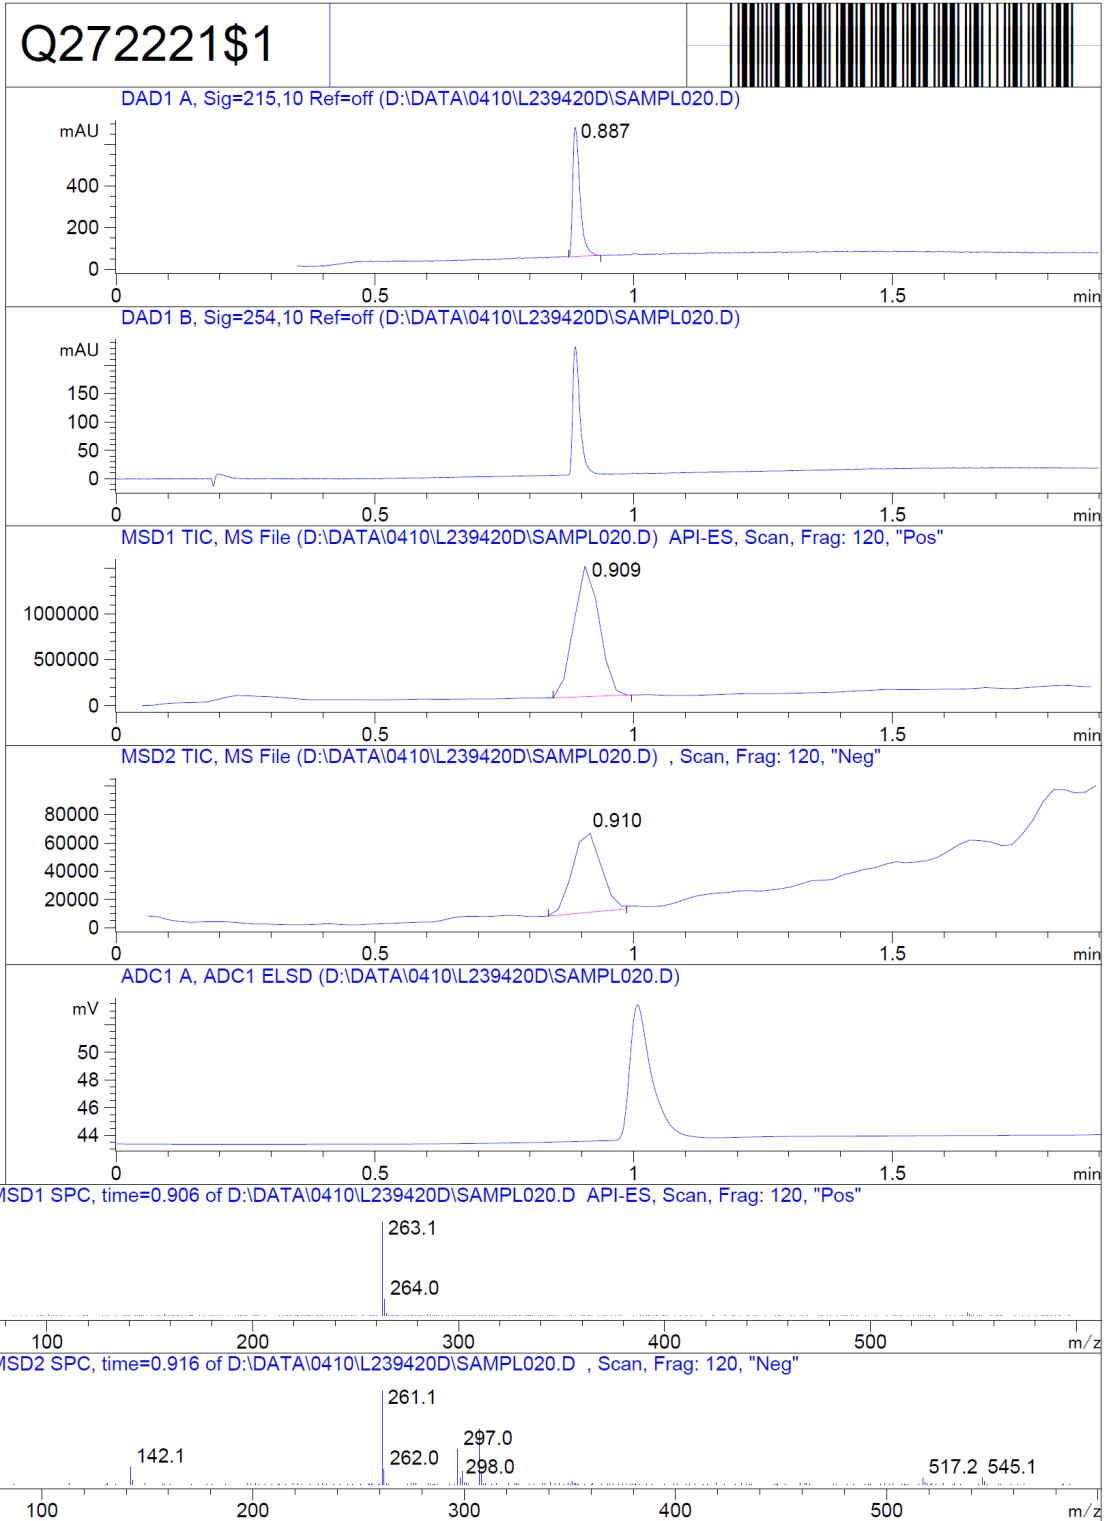

RT 0.909

RT 0.910

Z4444622066

Z4444622066

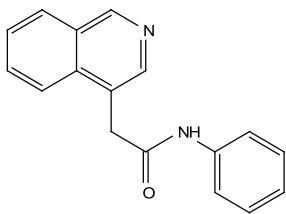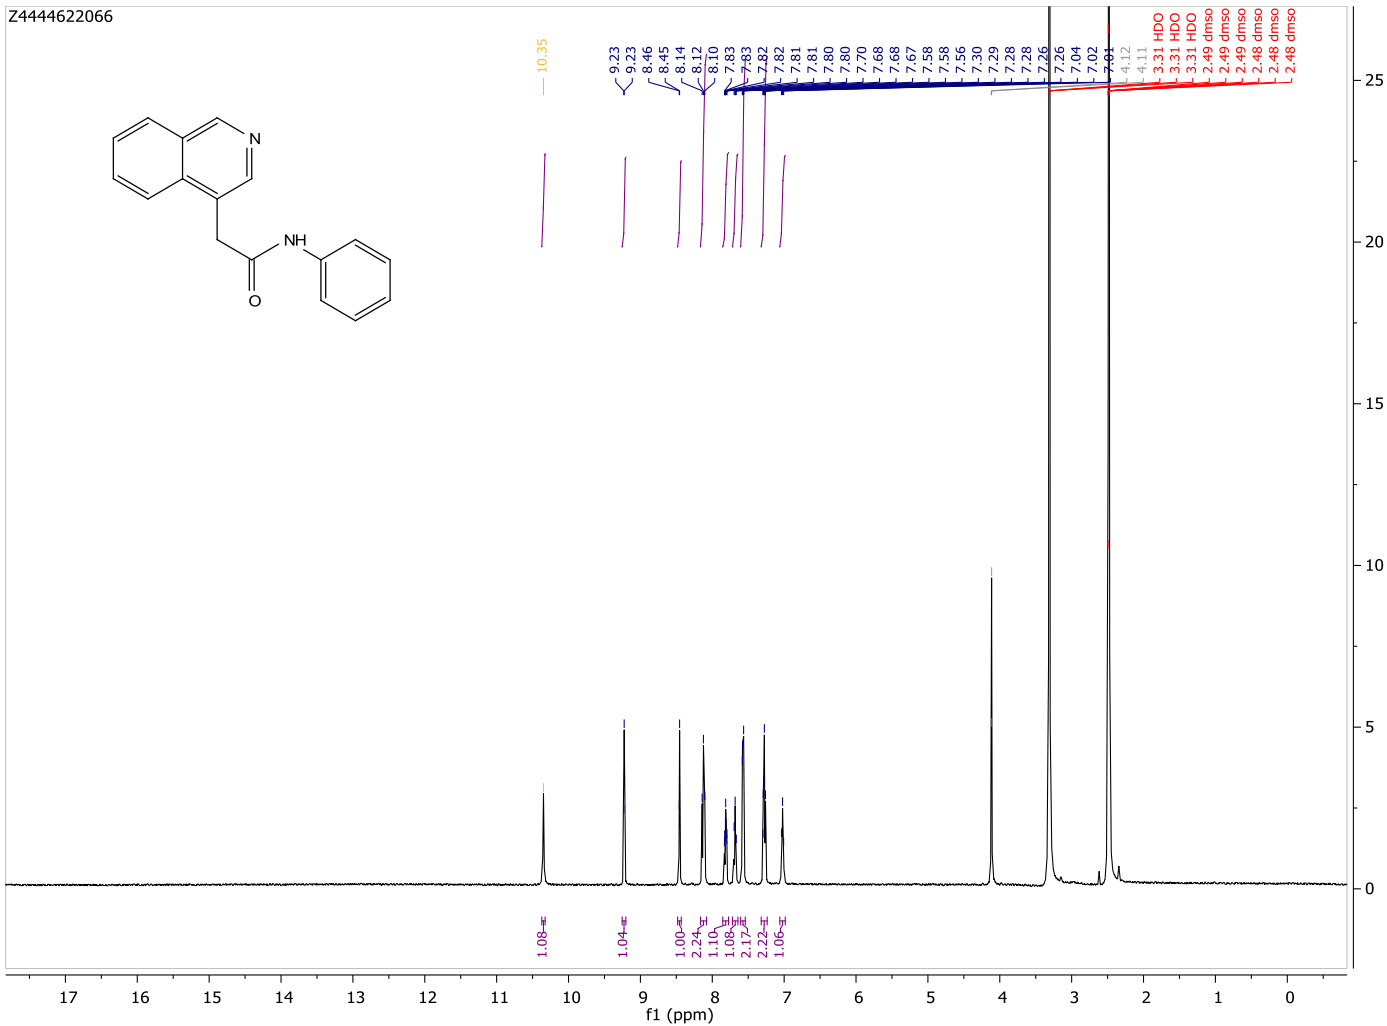

MaxPeak: 100.00%  
Ret\_Time: 1.173 min

Q227951\$2

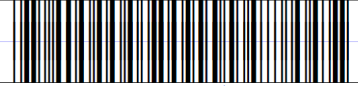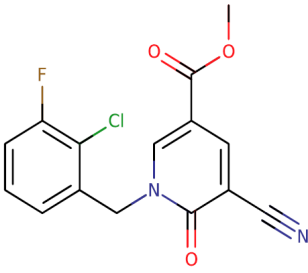

Mol Wt 320.7  
Exact Mass 320.04

| # | Time  | Area%  |
|---|-------|--------|
| 1 | 1.173 | 100.00 |

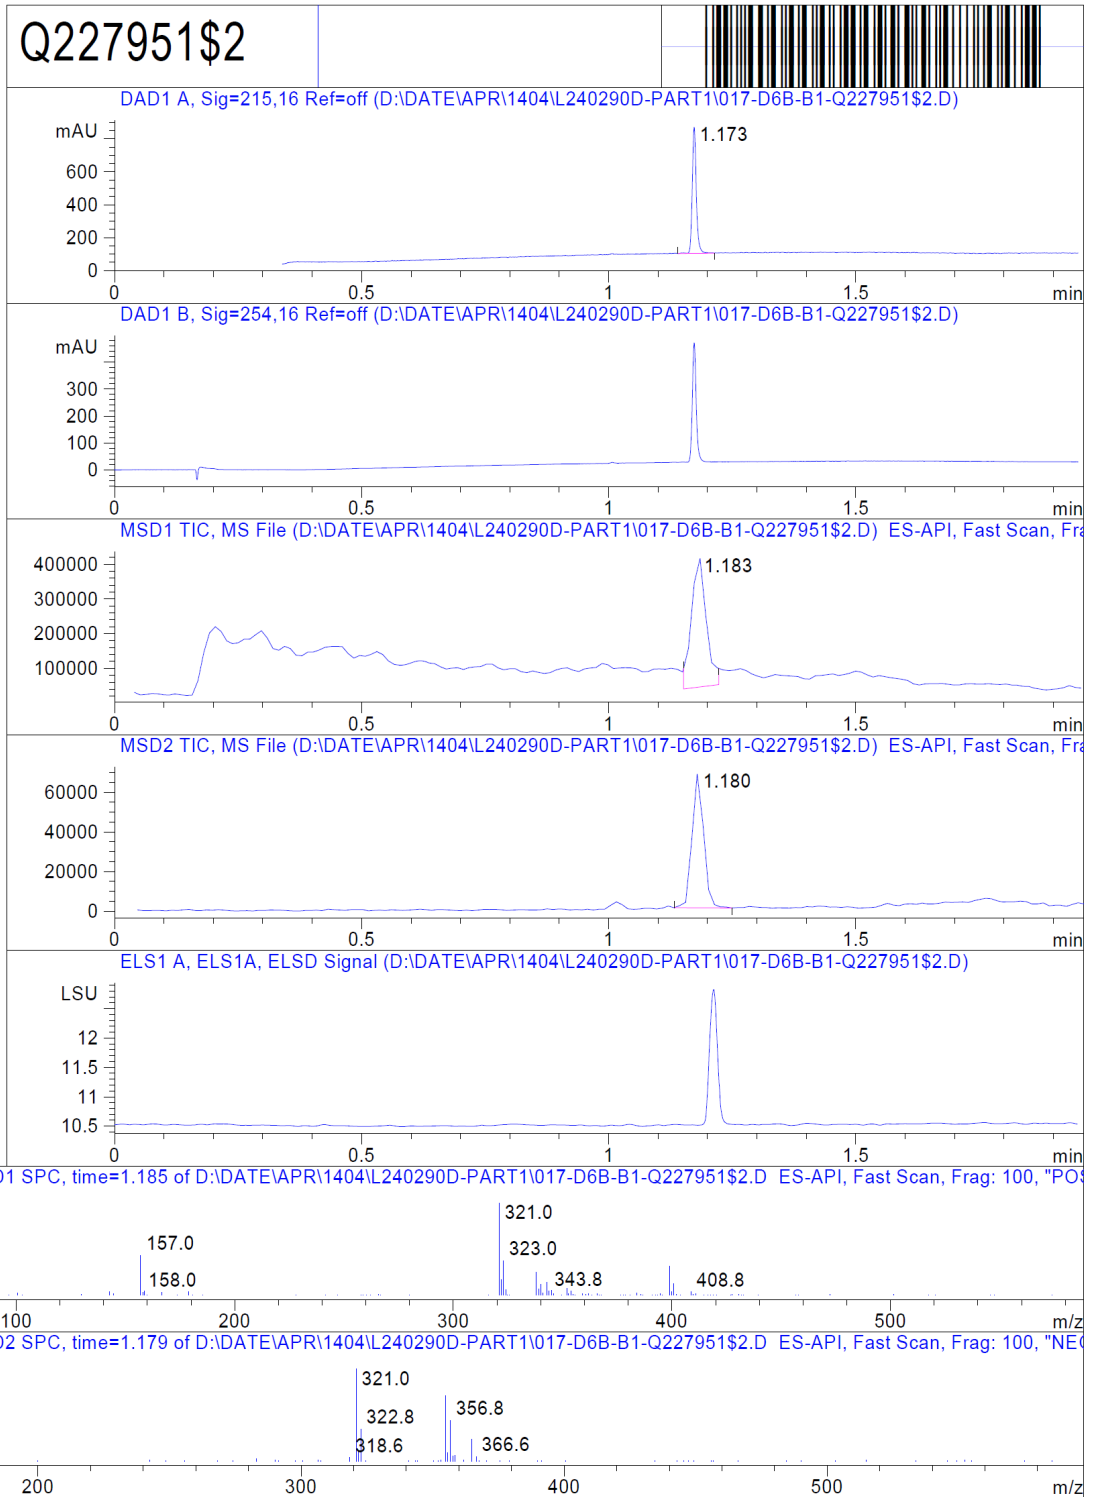

Z1578697783\_(ZINC000338540162)

Z1578697783\_(ZINC000338540162)

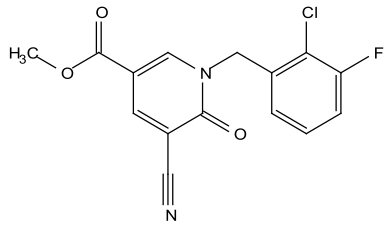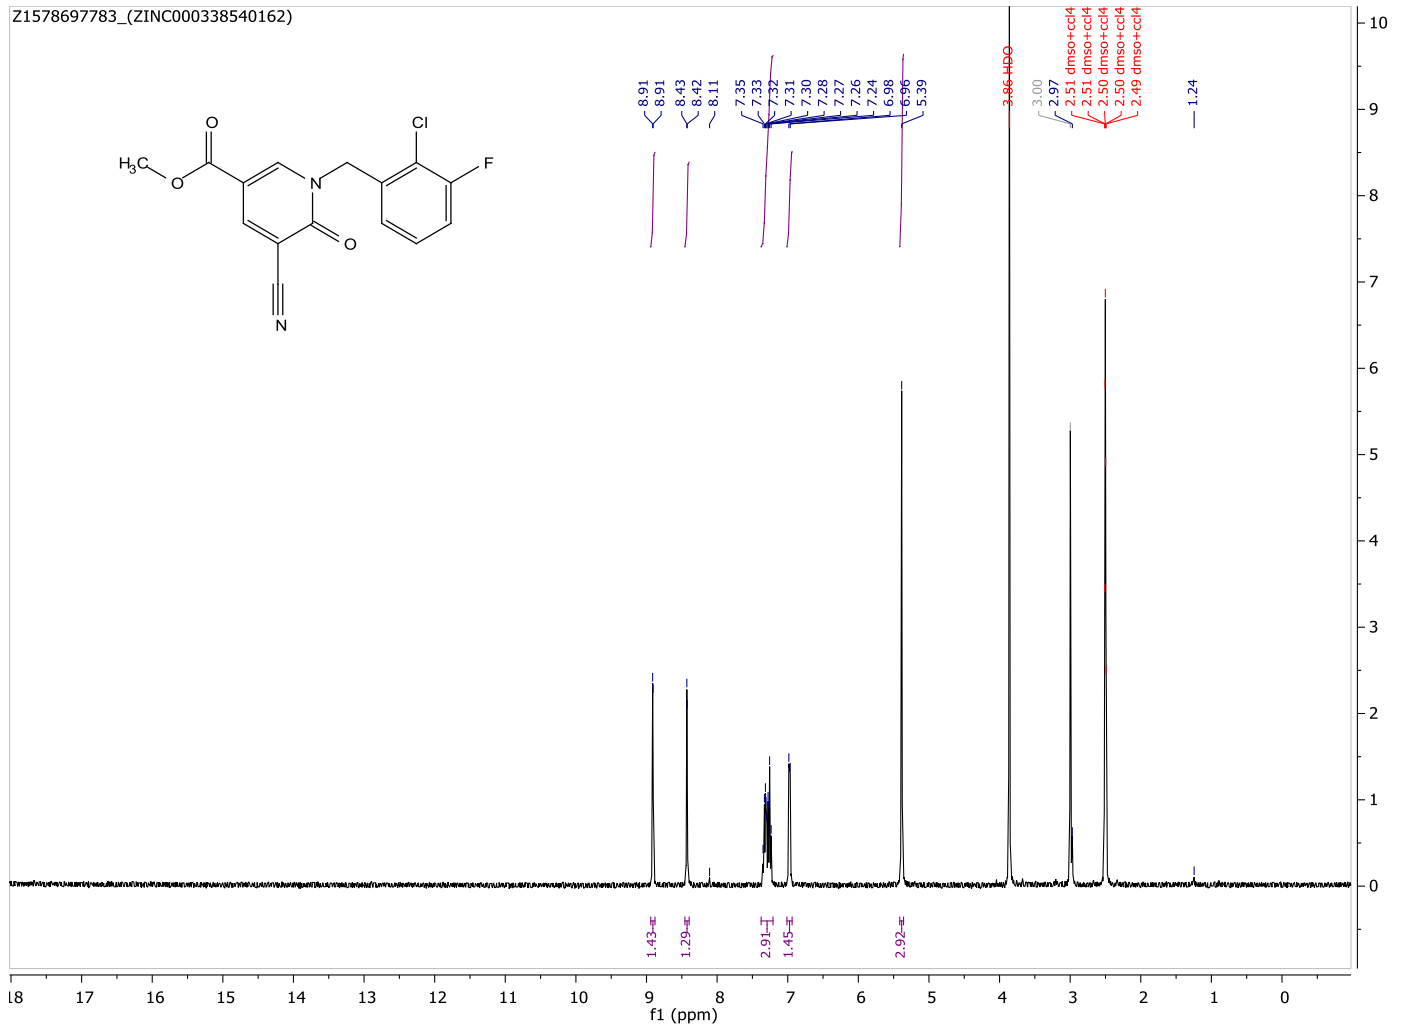

MaxPeak: 100.00%  
Ret\_Time: 1.333 min

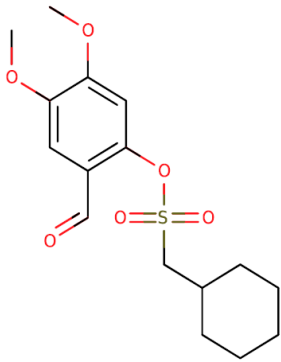

Mol Wt 342.41  
Exact Mass 342.13

| # | Time  | Area%  |
|---|-------|--------|
| 1 | 1.333 | 100.00 |

Q227954\$3

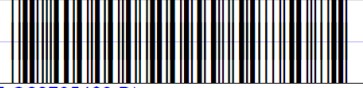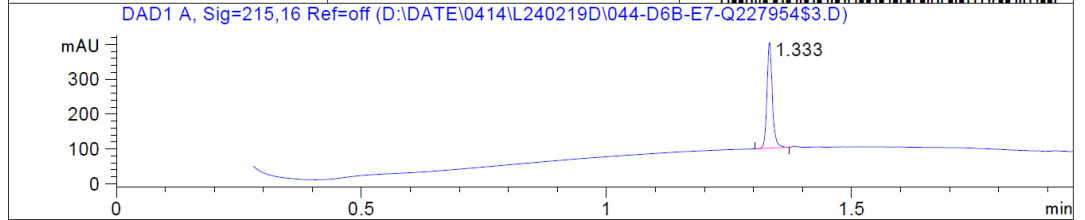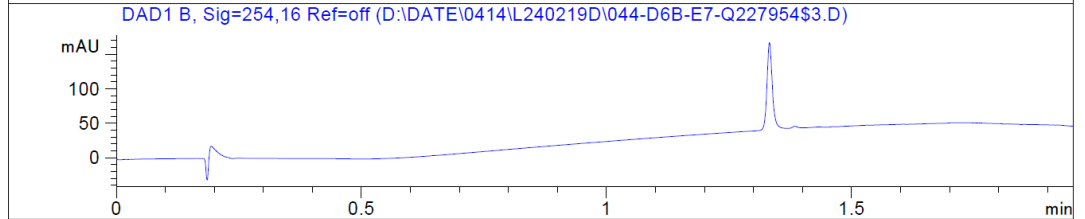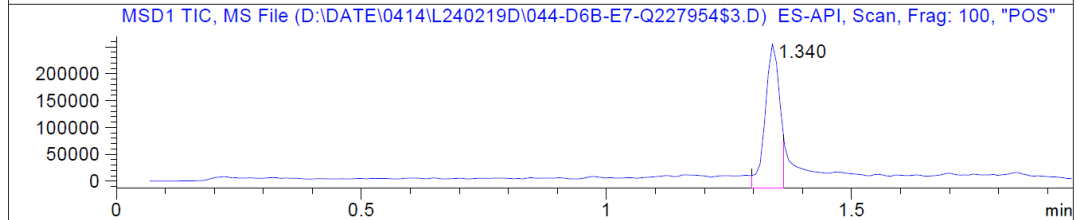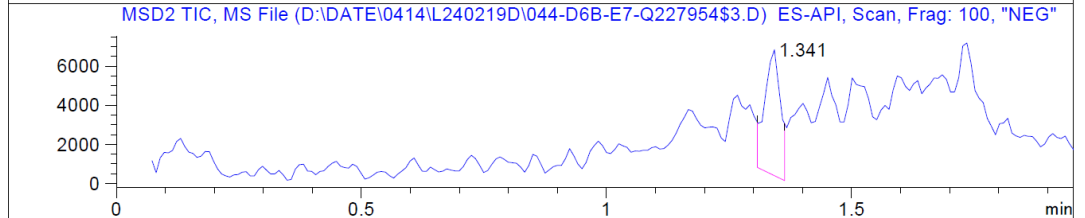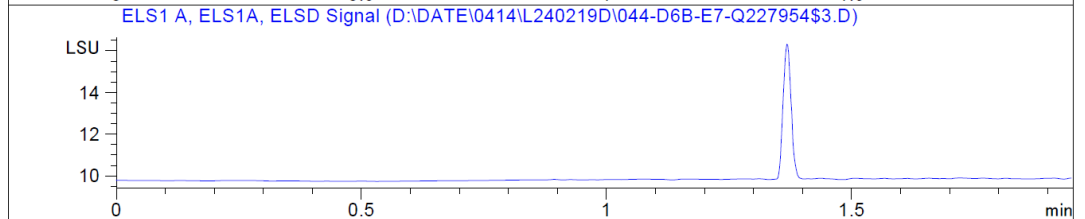

RT 1.340

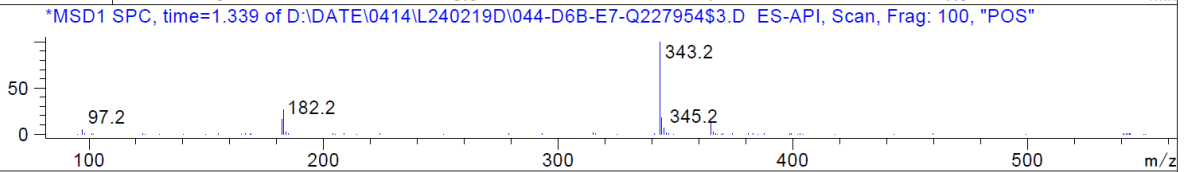

RT 1.341

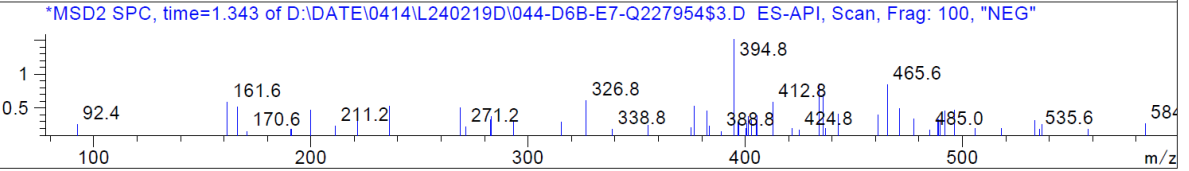

Z1564333798\_(ZINC000271072260)

Z1564333798\_(ZINC000271072260)

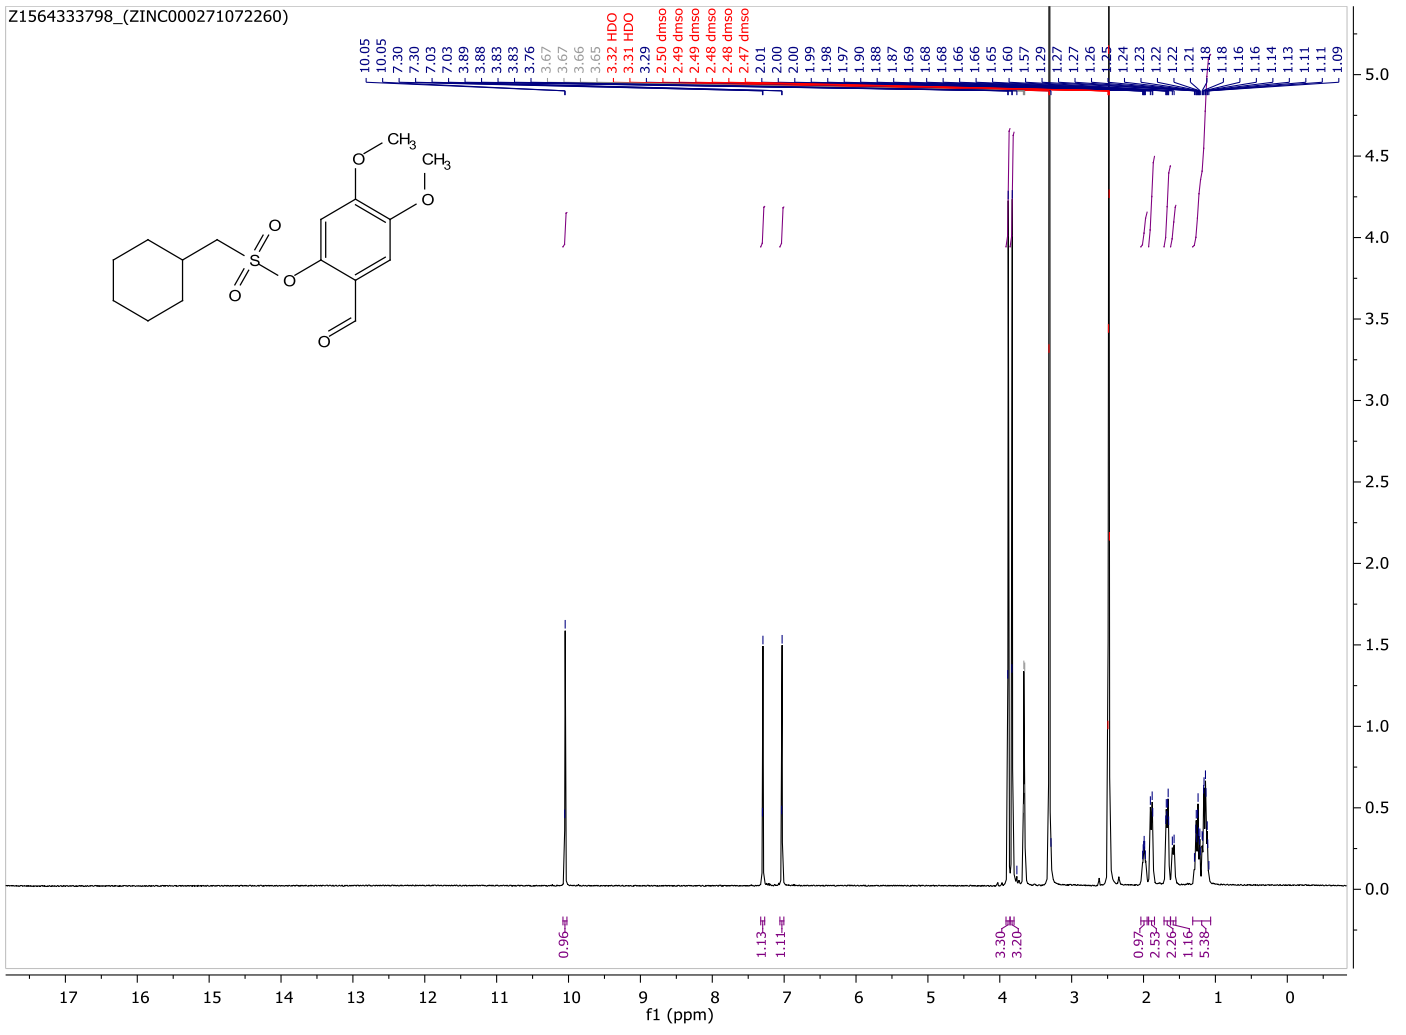



MaxPeak: 91.00%  
Ret\_Time: 1.297 min

Q228021\$4

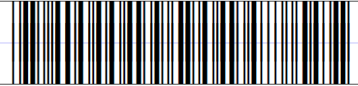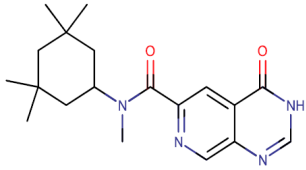

Mol Wt 342.44  
Exact Mass 342.24

| # | Time  | Area% |
|---|-------|-------|
| 1 | 1.297 | 91.00 |
| 2 | 1.448 | 9.00  |

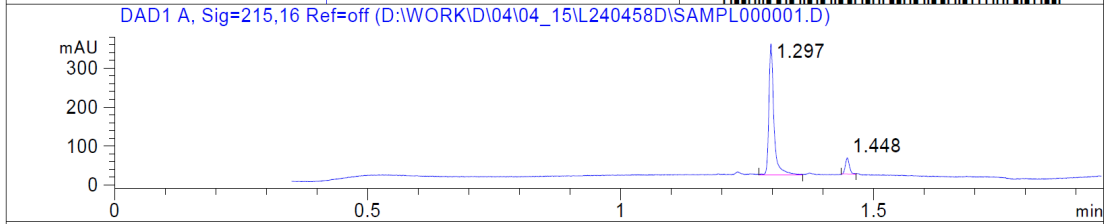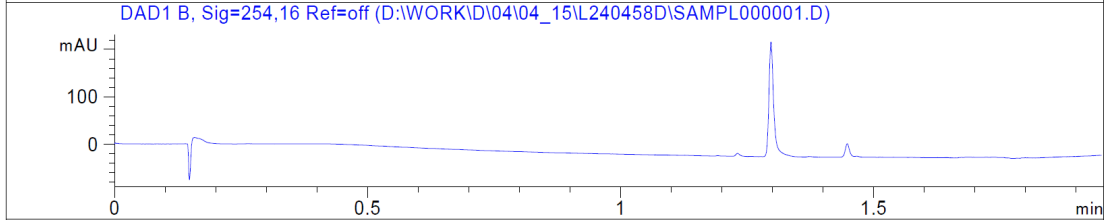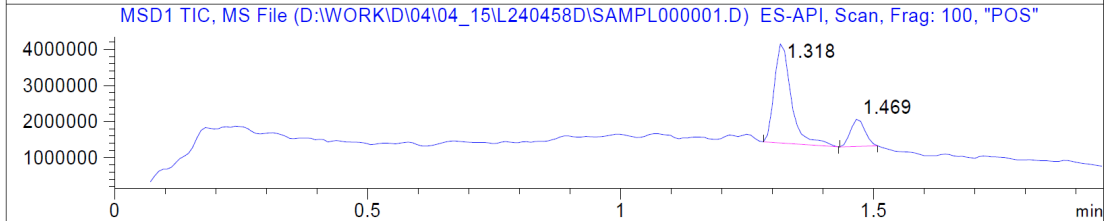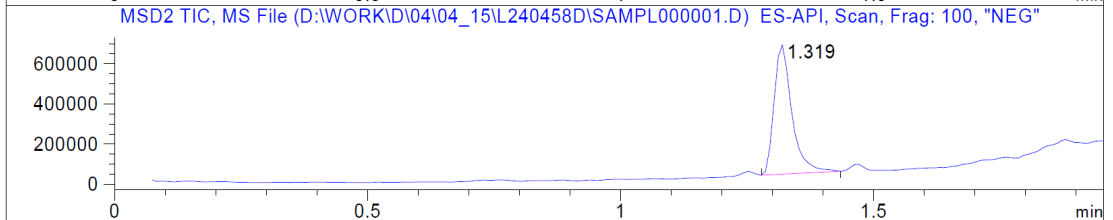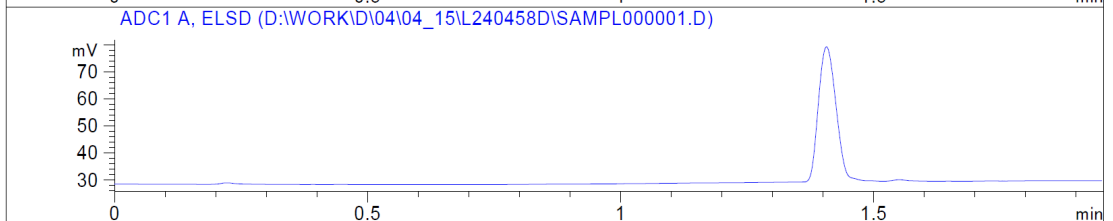

RT 1.318

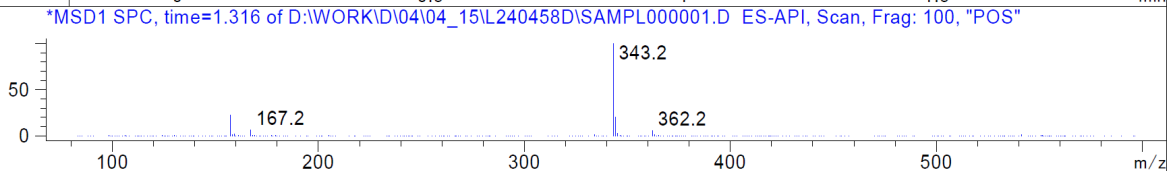

RT 1.469

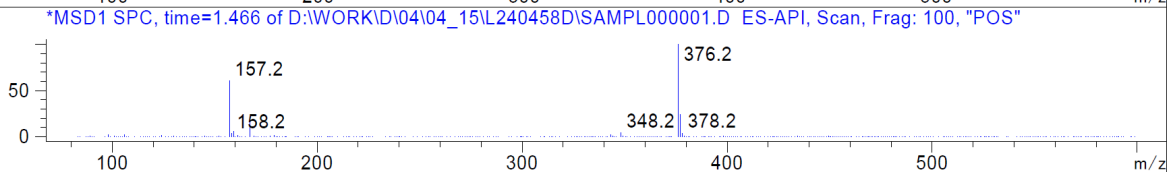

RT 1.319

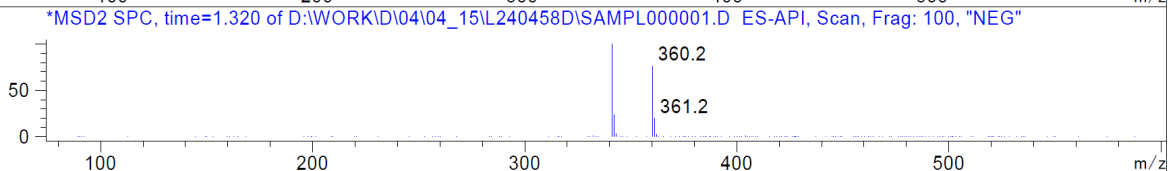

Z2644709353\_(ZINC000618071006)

Z2644709353\_(ZINC000618071006)

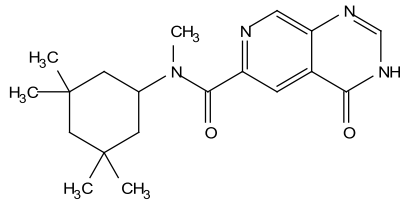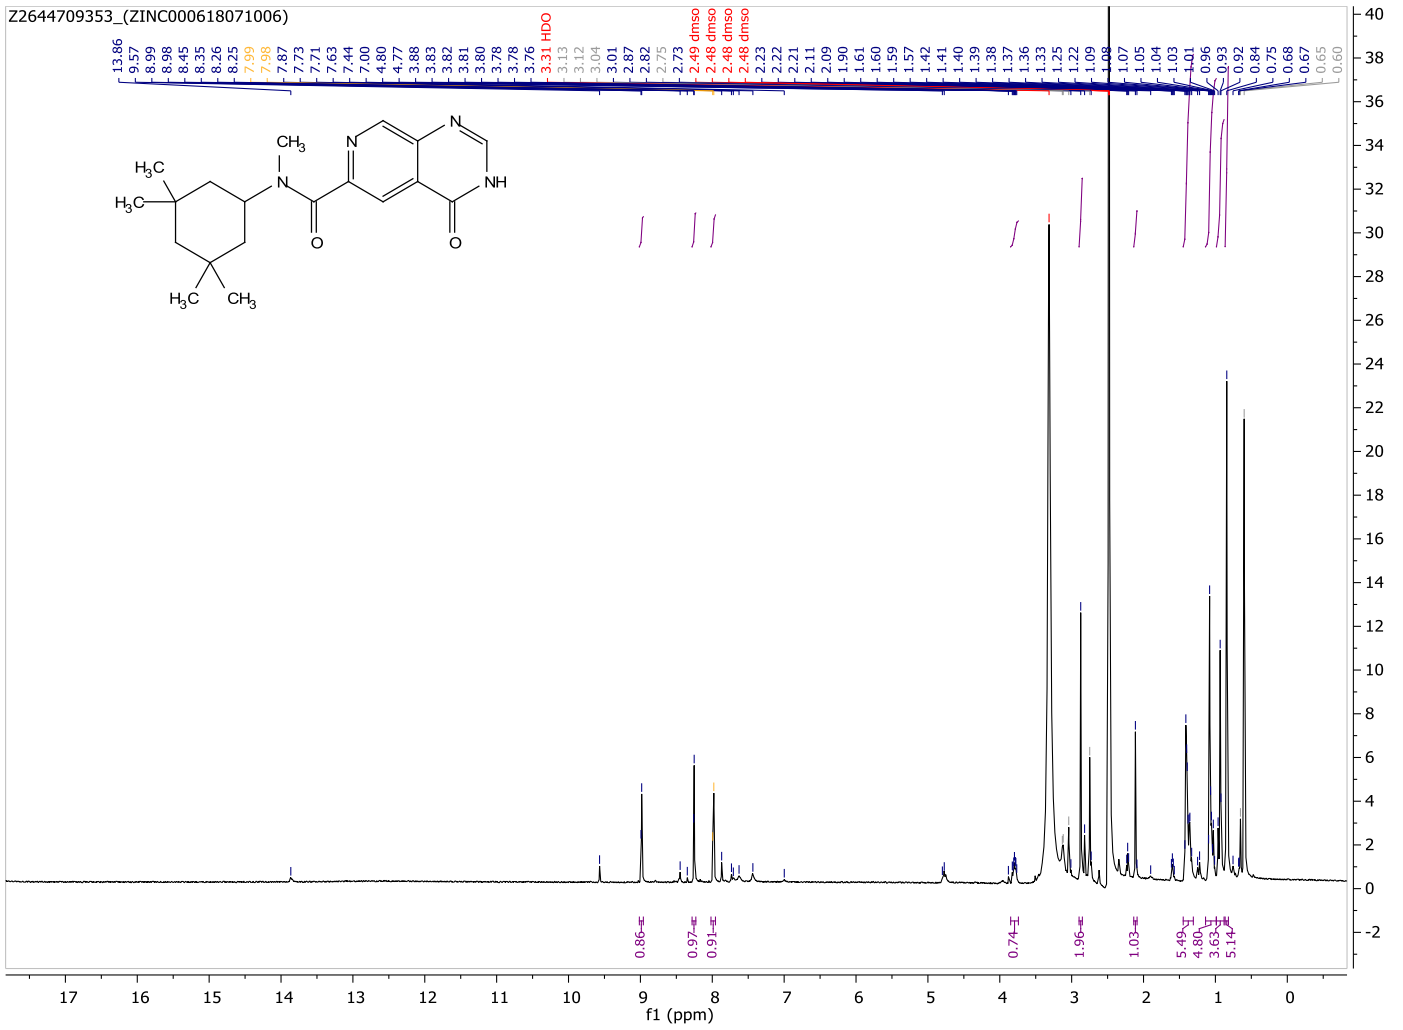

MaxPeak: 100.00%  
Ret\_Time: 0.736 min

Q227982\$2

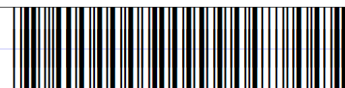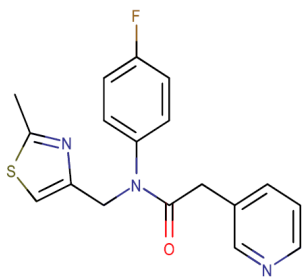

Mol Wt 341.4  
Exact Mass 341.12

| # | Time  | Area%  |
|---|-------|--------|
| 1 | 0.736 | 100.00 |

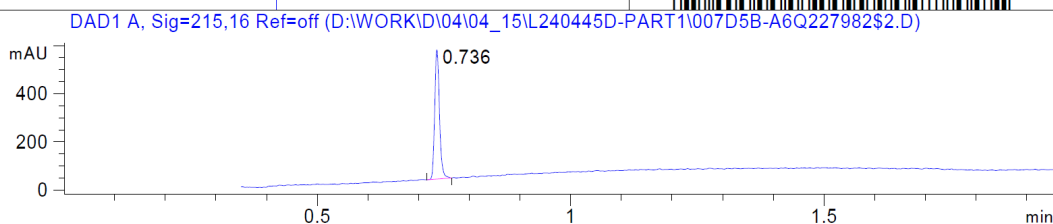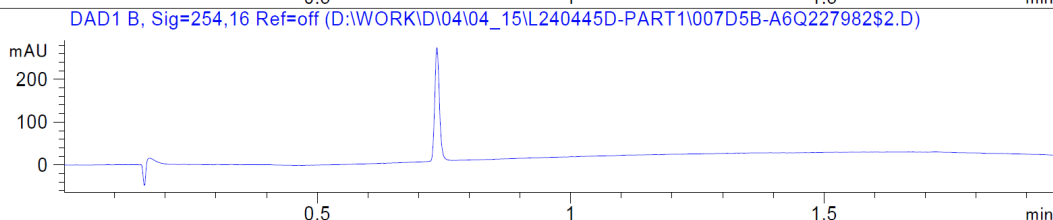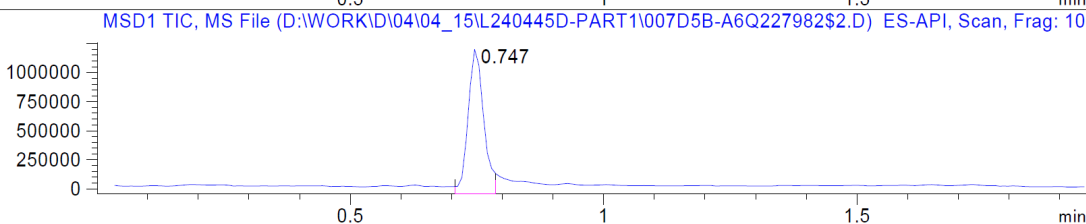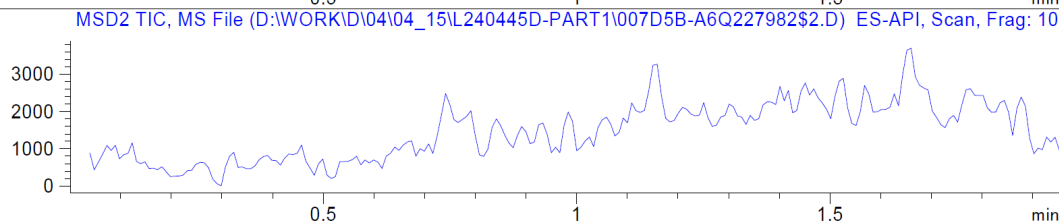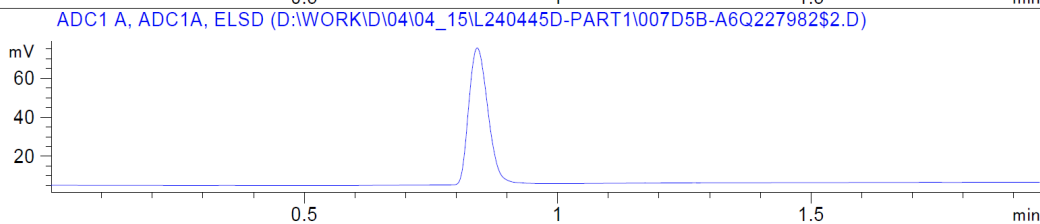

RT 0.747

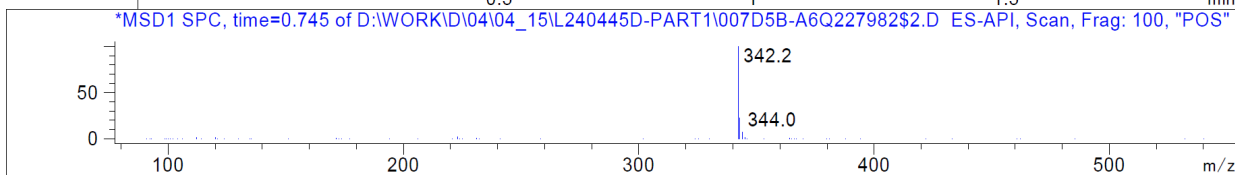

Z1171336722\_(ZINC000346368145)

Z1171336722\_(ZINC000346368145)

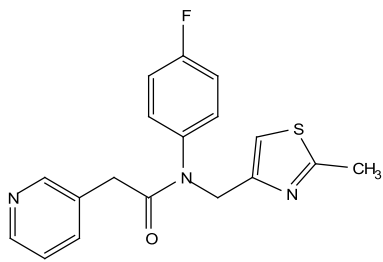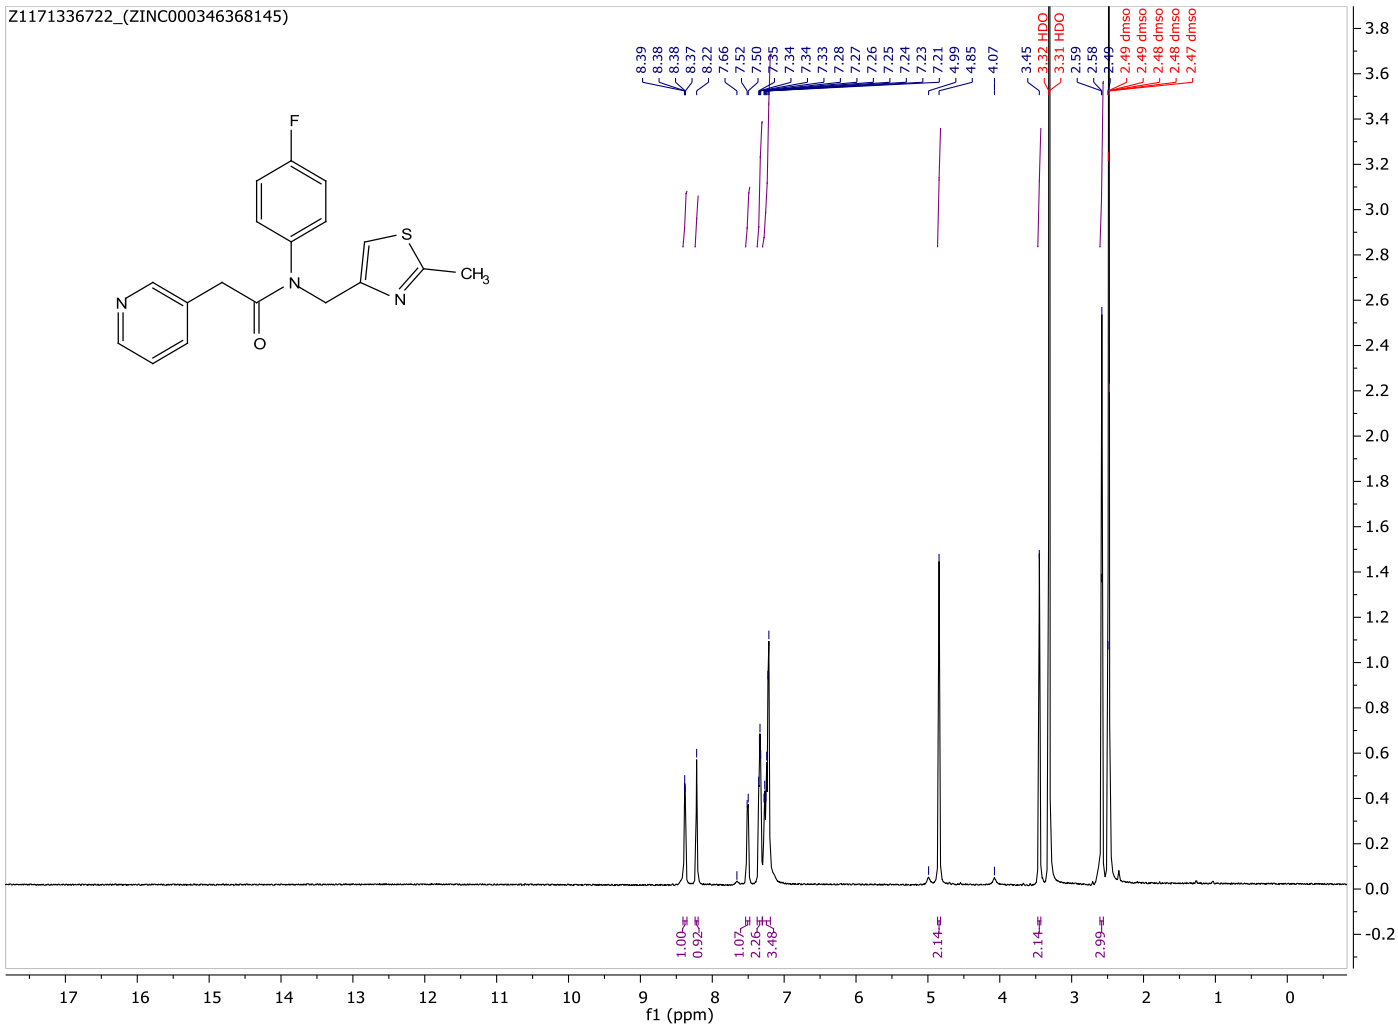

# Q227994\$1

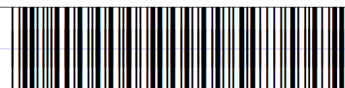

MaxPeak: 100.00%  
Ret\_Time: 0.886 min

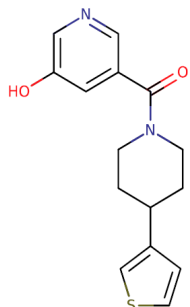

**Mol Wt** 288.36  
**Exact Mass** 288.11

| # | Time  | Area%  |
|---|-------|--------|
| 1 | 0.886 | 100.00 |

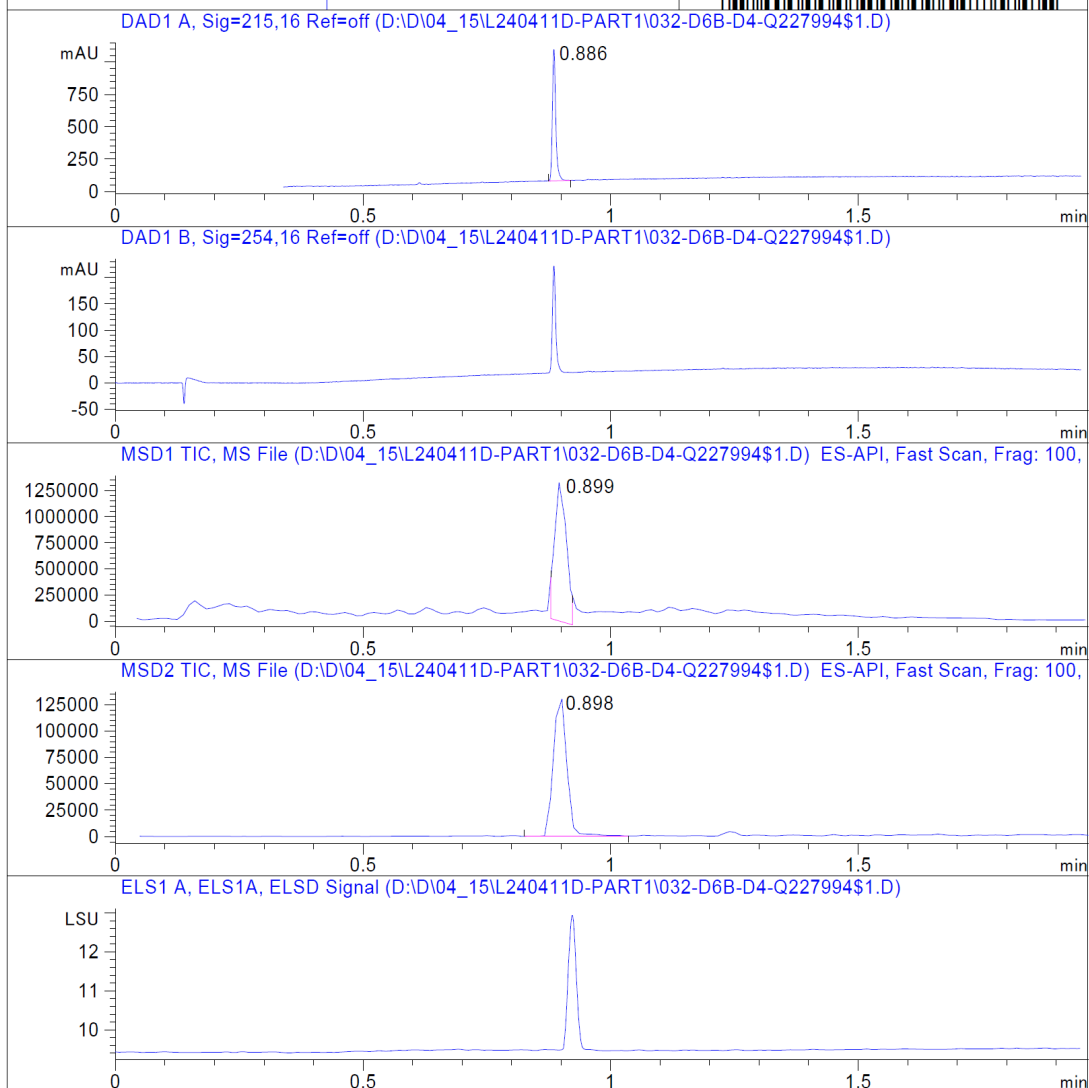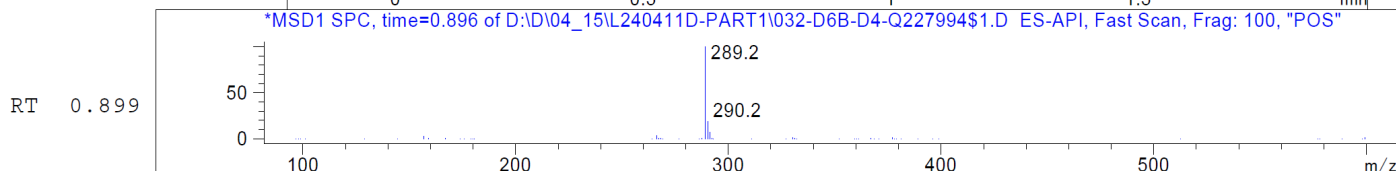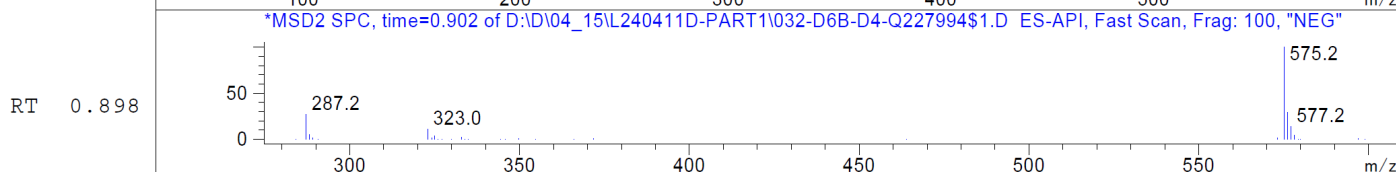

Z1740796453\_(ZINC000188718998)

Z1740796453\_(ZINC000188718998)

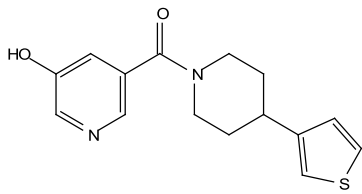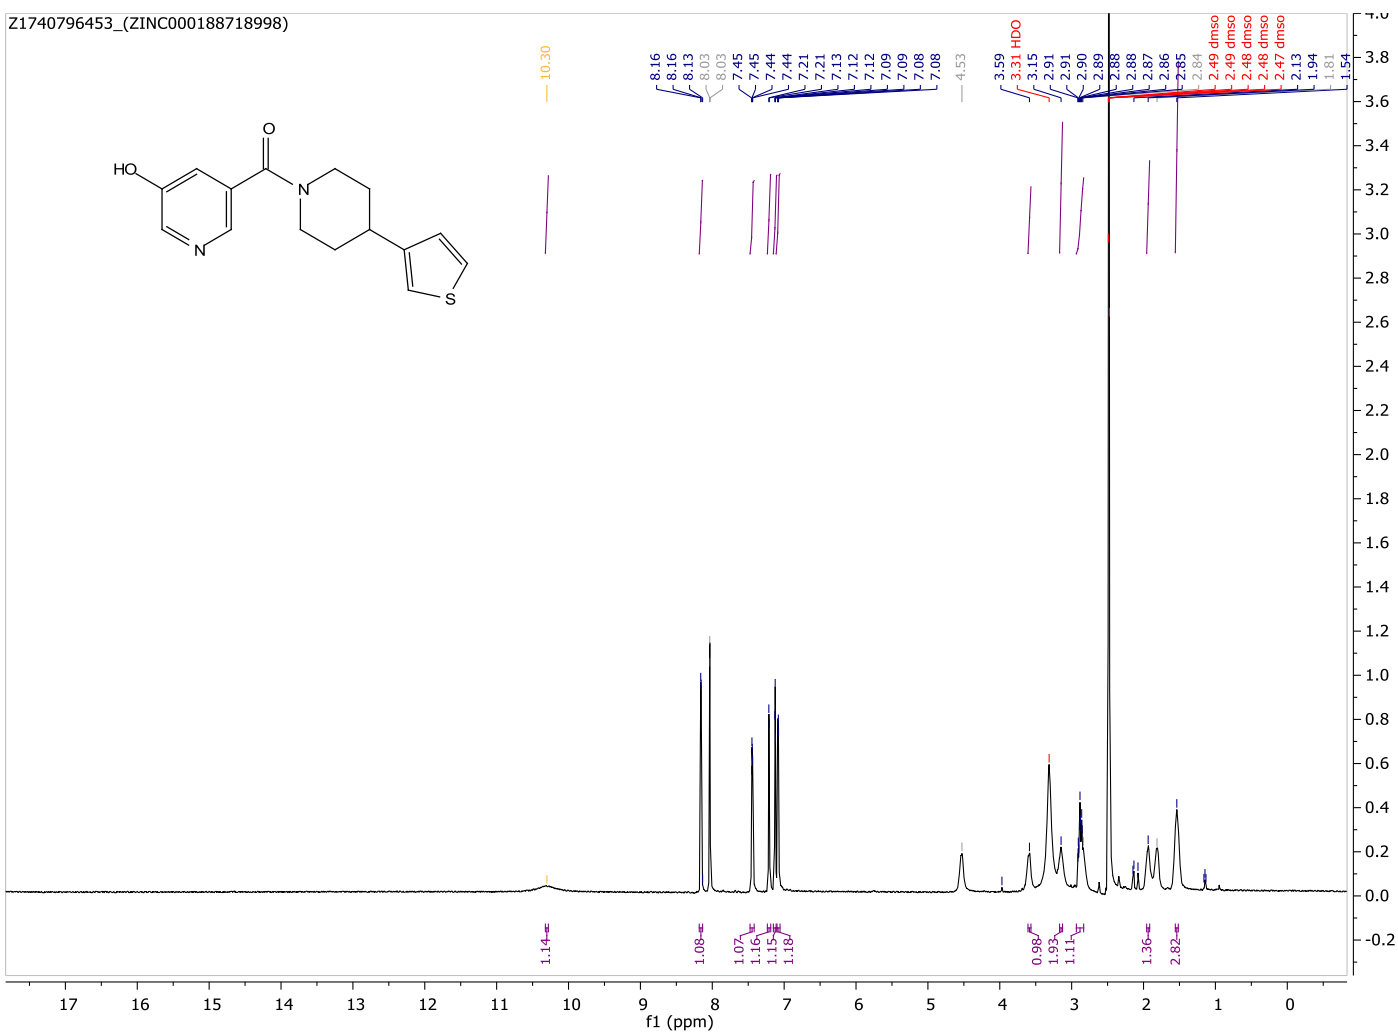

MaxPeak: 100.00%  
Ret\_Time: 0.772 min

Q227995\$4

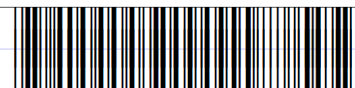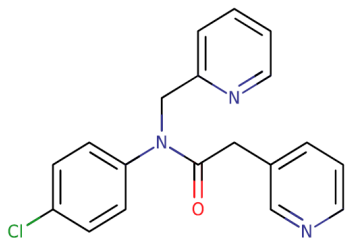

Mol Wt 337.8  
Exact Mass 337.12

| # | Time  | Area%  |
|---|-------|--------|
| 1 | 0.772 | 100.00 |

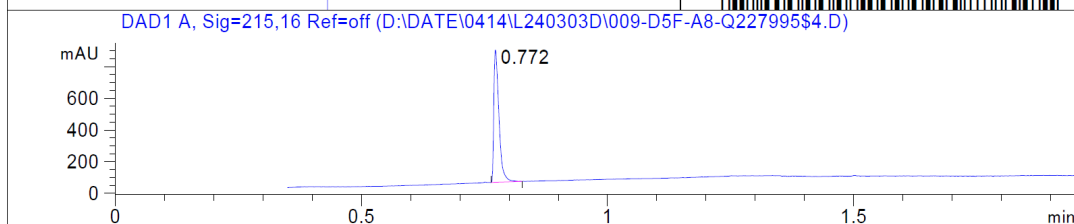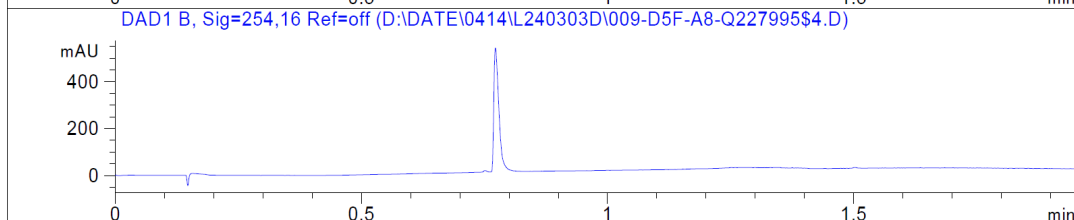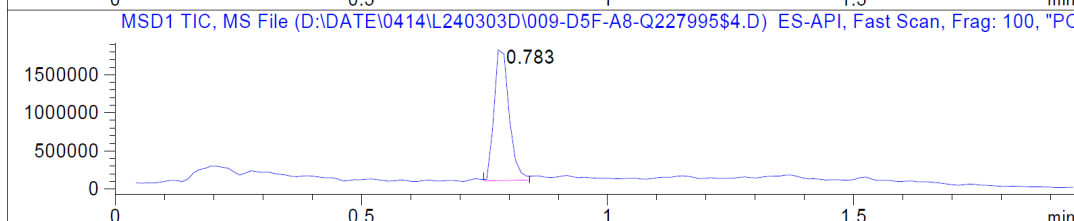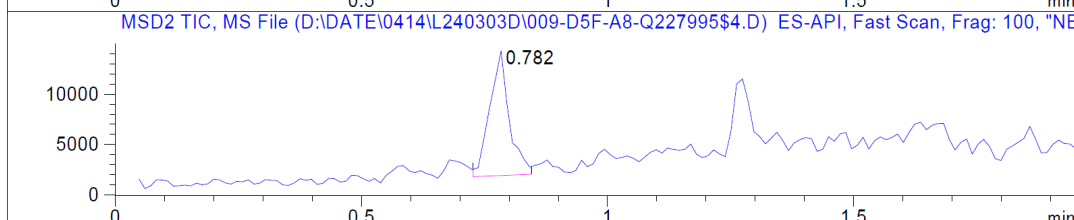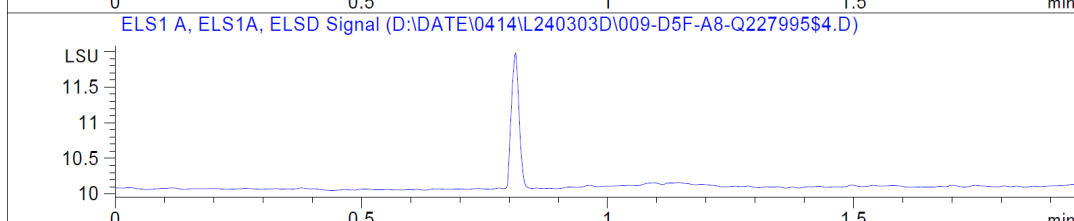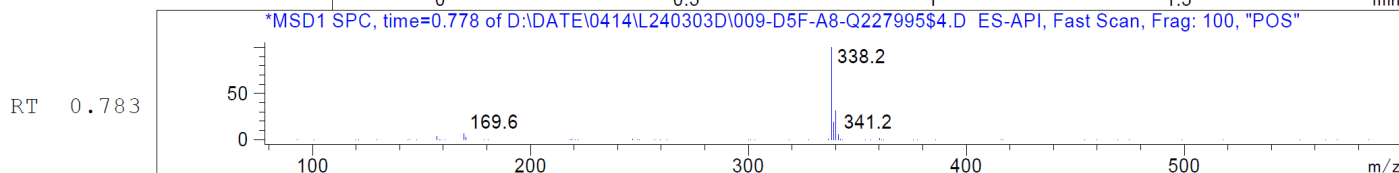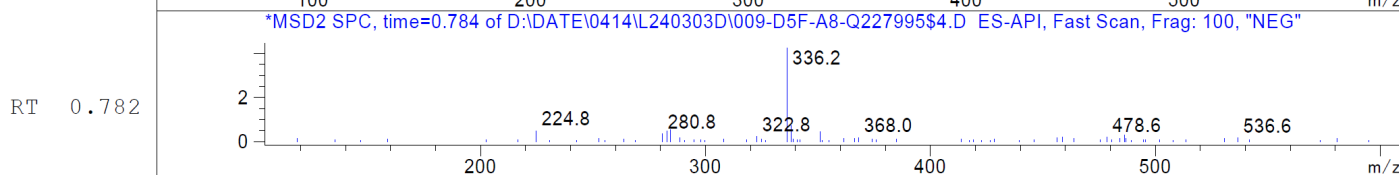

Z1171337460\_(ZINC000346371112)

Z1171337460\_(ZINC000346371112)

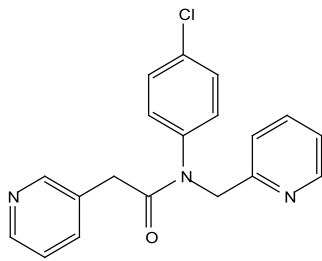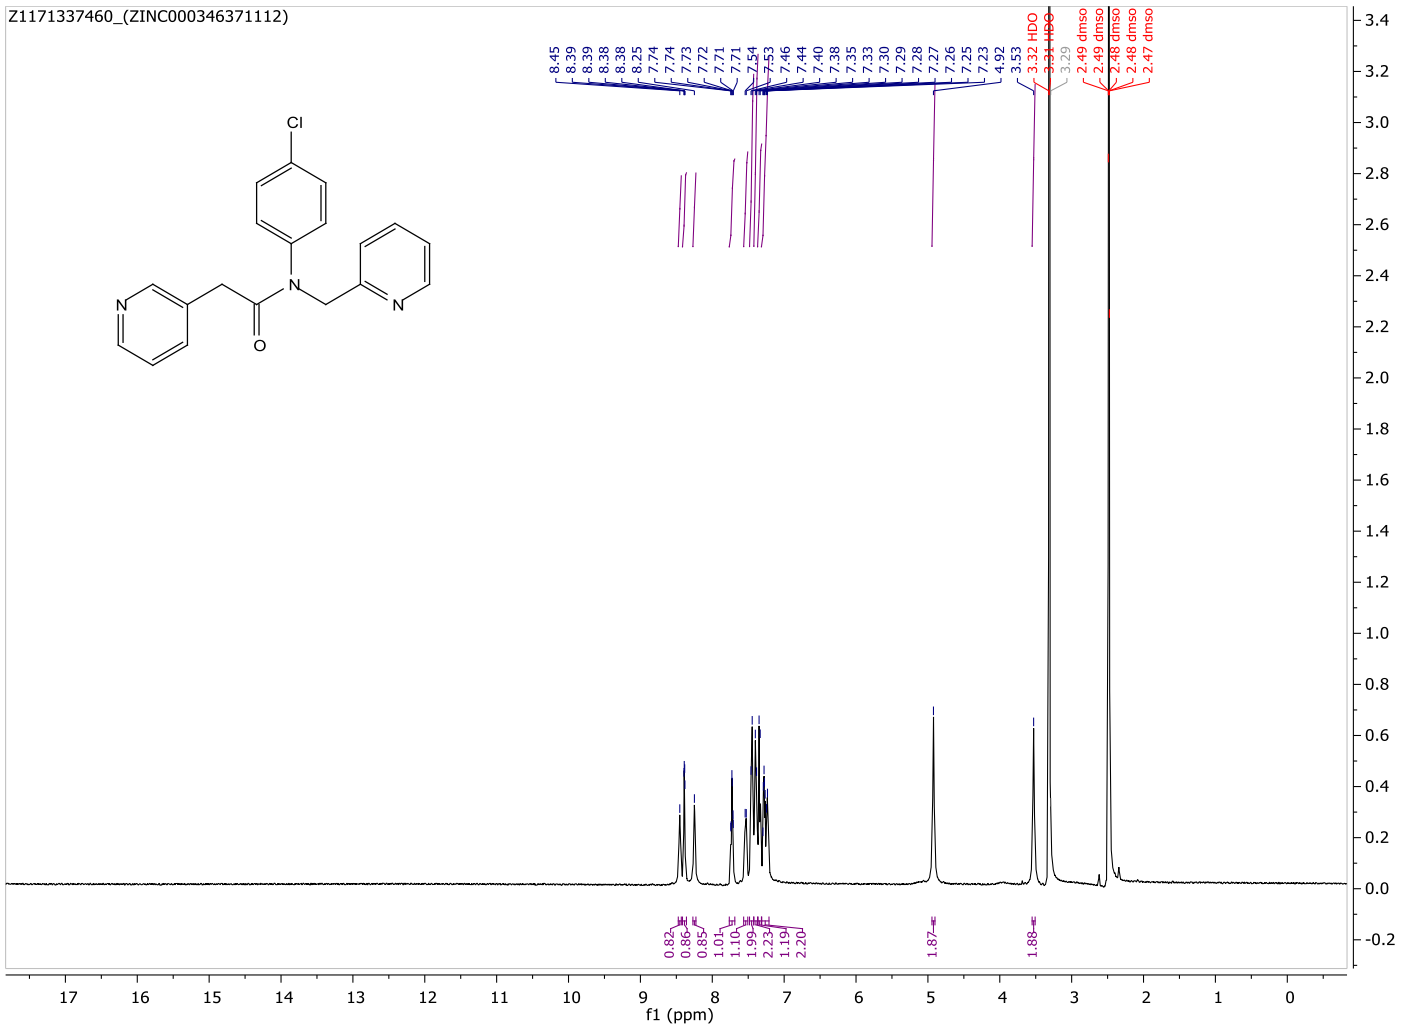



MaxPeak: 100.00%  
Ret\_Time: 1.043 min

Q227980\$2

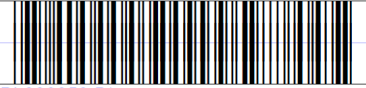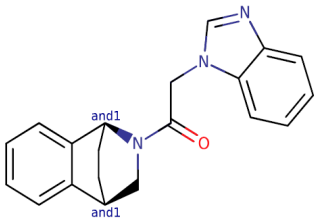

Mol Wt 317.38  
Exact Mass 317.18

| # | Time  | Area%  |
|---|-------|--------|
| 1 | 1.043 | 100.00 |

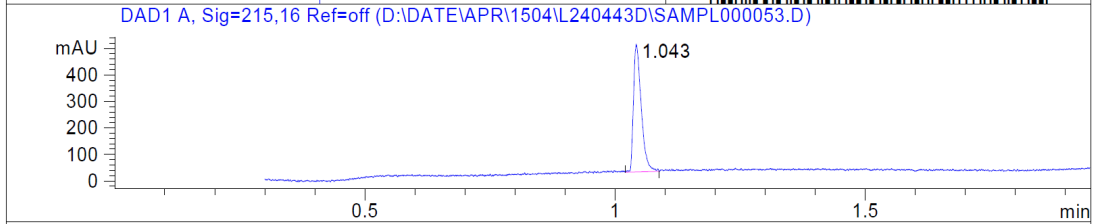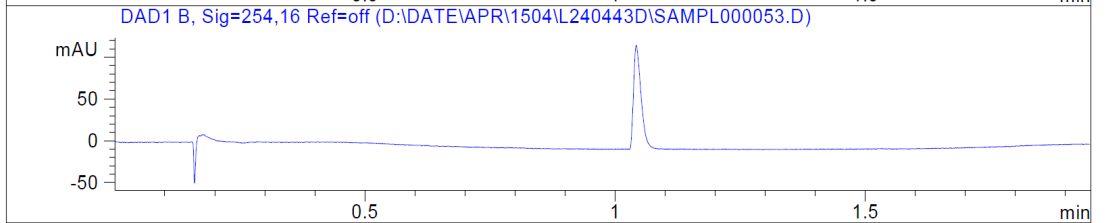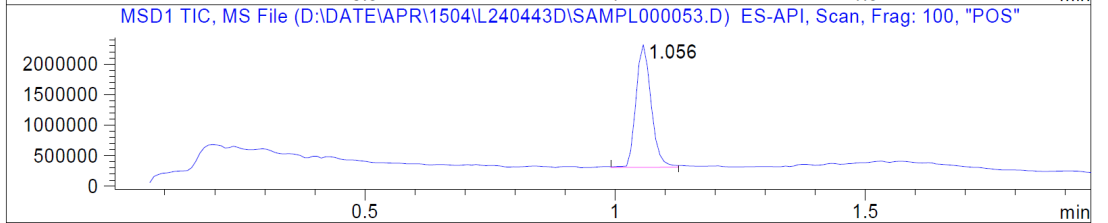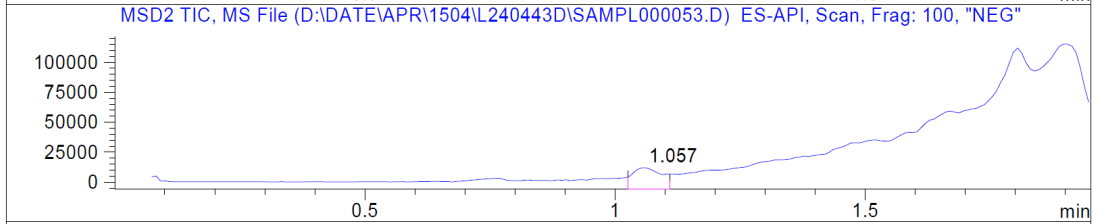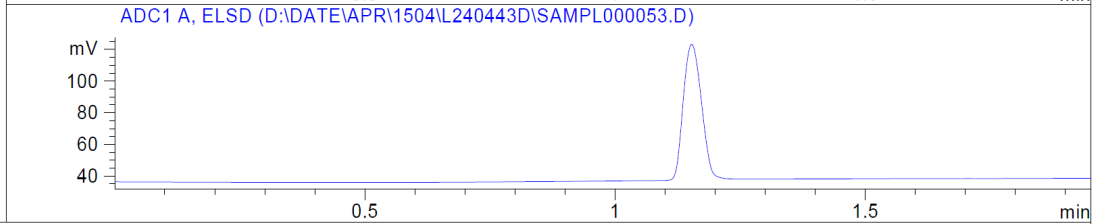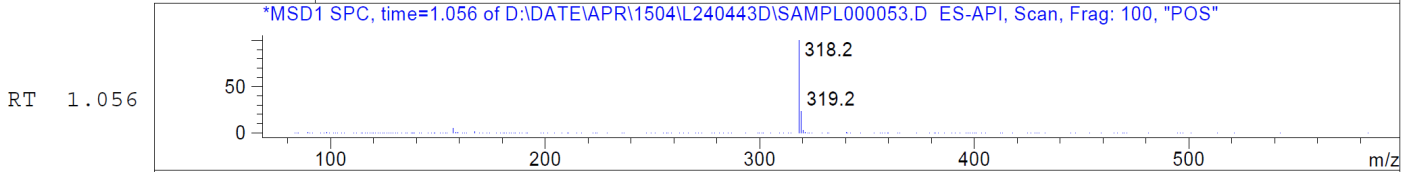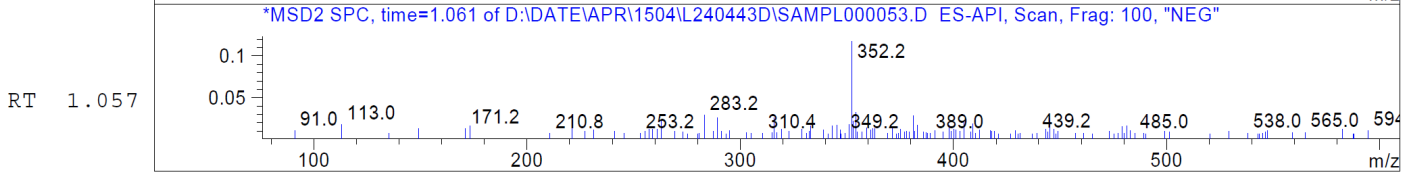

Z2876049675\_(ZINC001339780091)

Z2876049675\_(ZINC001339780091)

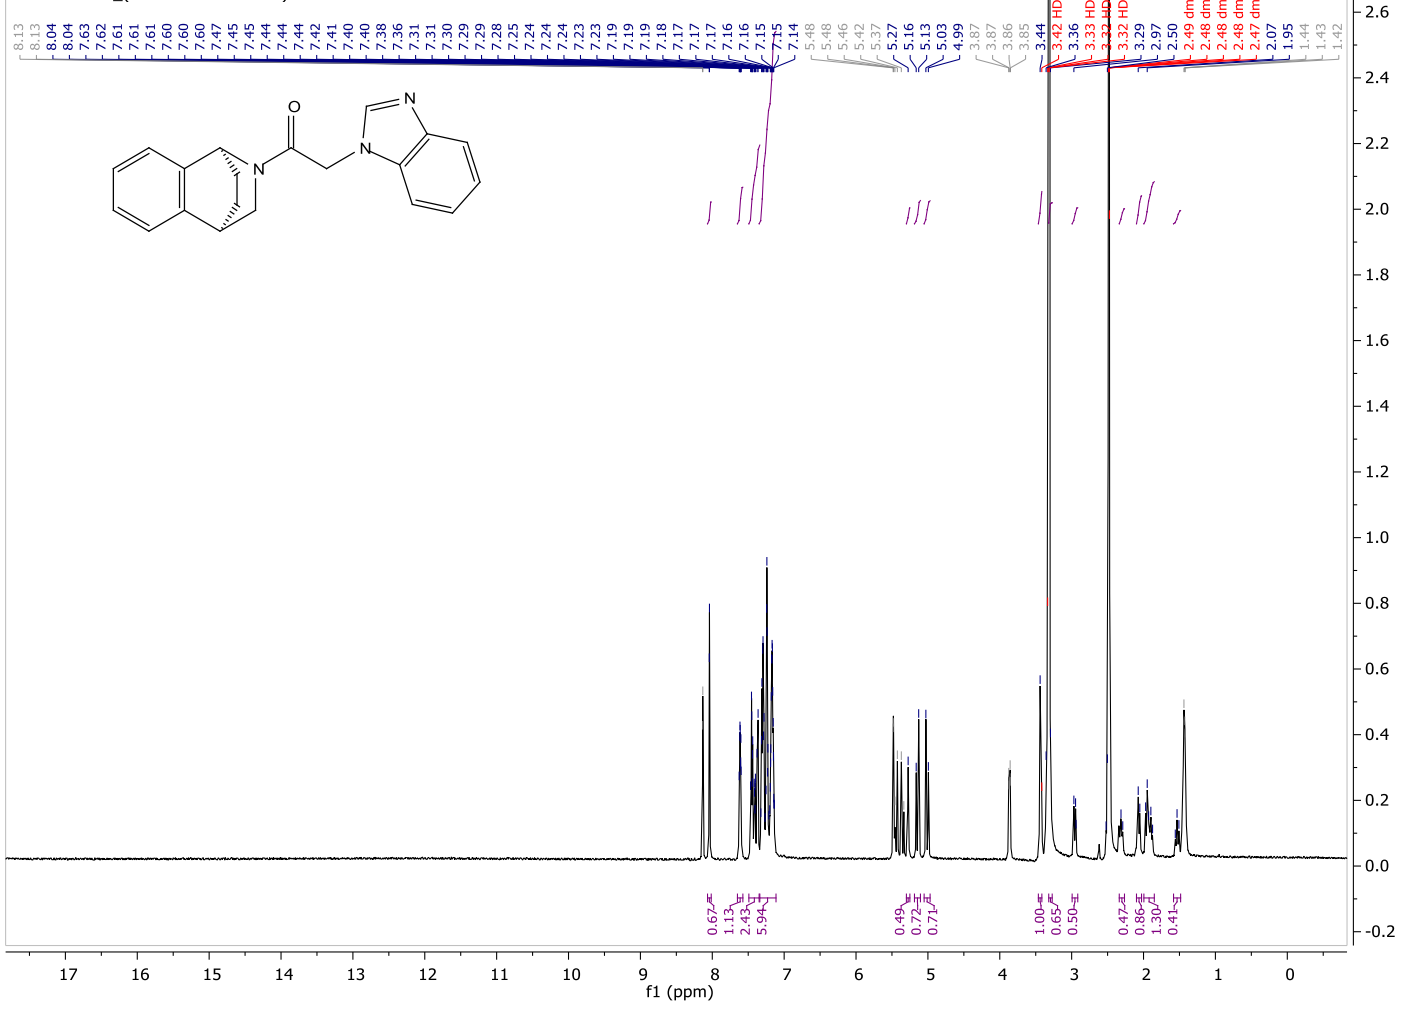

MaxPeak: 100.00%  
Ret\_Time: 1.255 min

# Q228024\$1

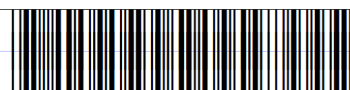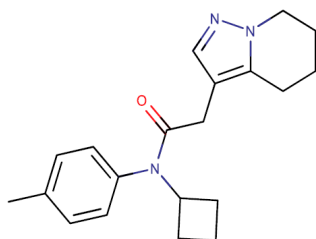

**Mol Wt** 323.43  
**Exact Mass** 323.24

| # | Time  | Area%  |
|---|-------|--------|
| 1 | 1.255 | 100.00 |

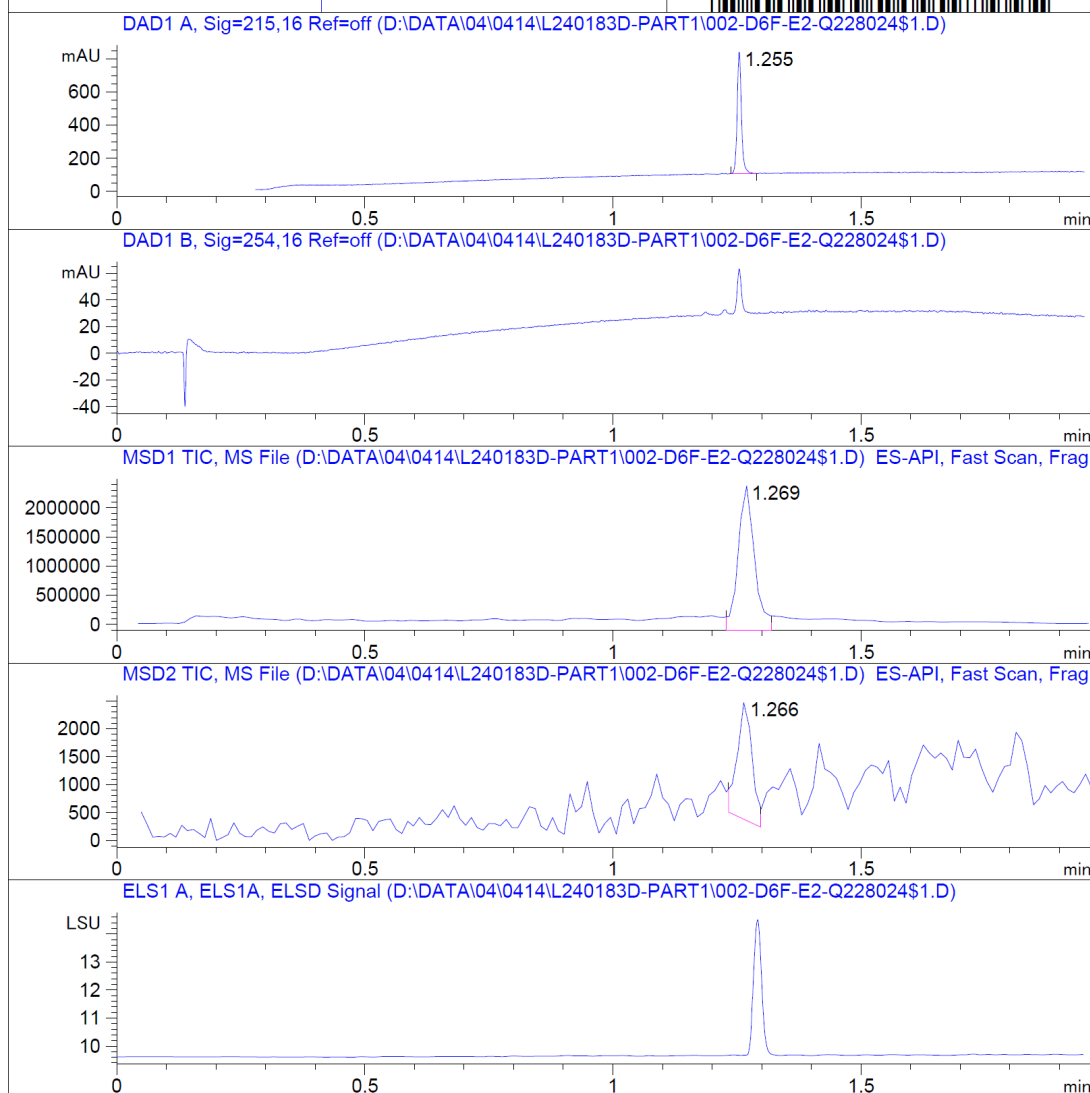

RT 1.269

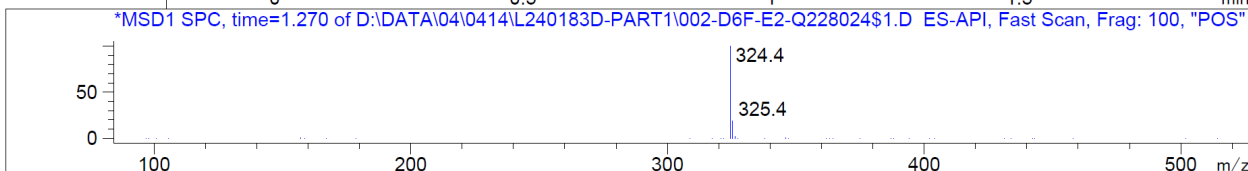

RT 1.266

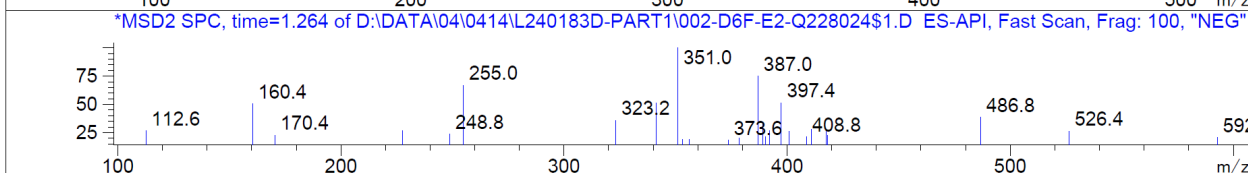

Z2876444855\_(ZINC000894230117)

Z2876444855\_(ZINC000894230117)

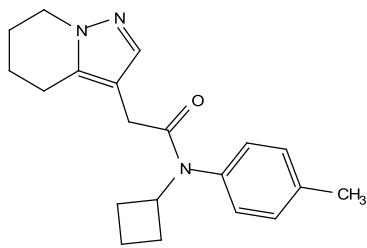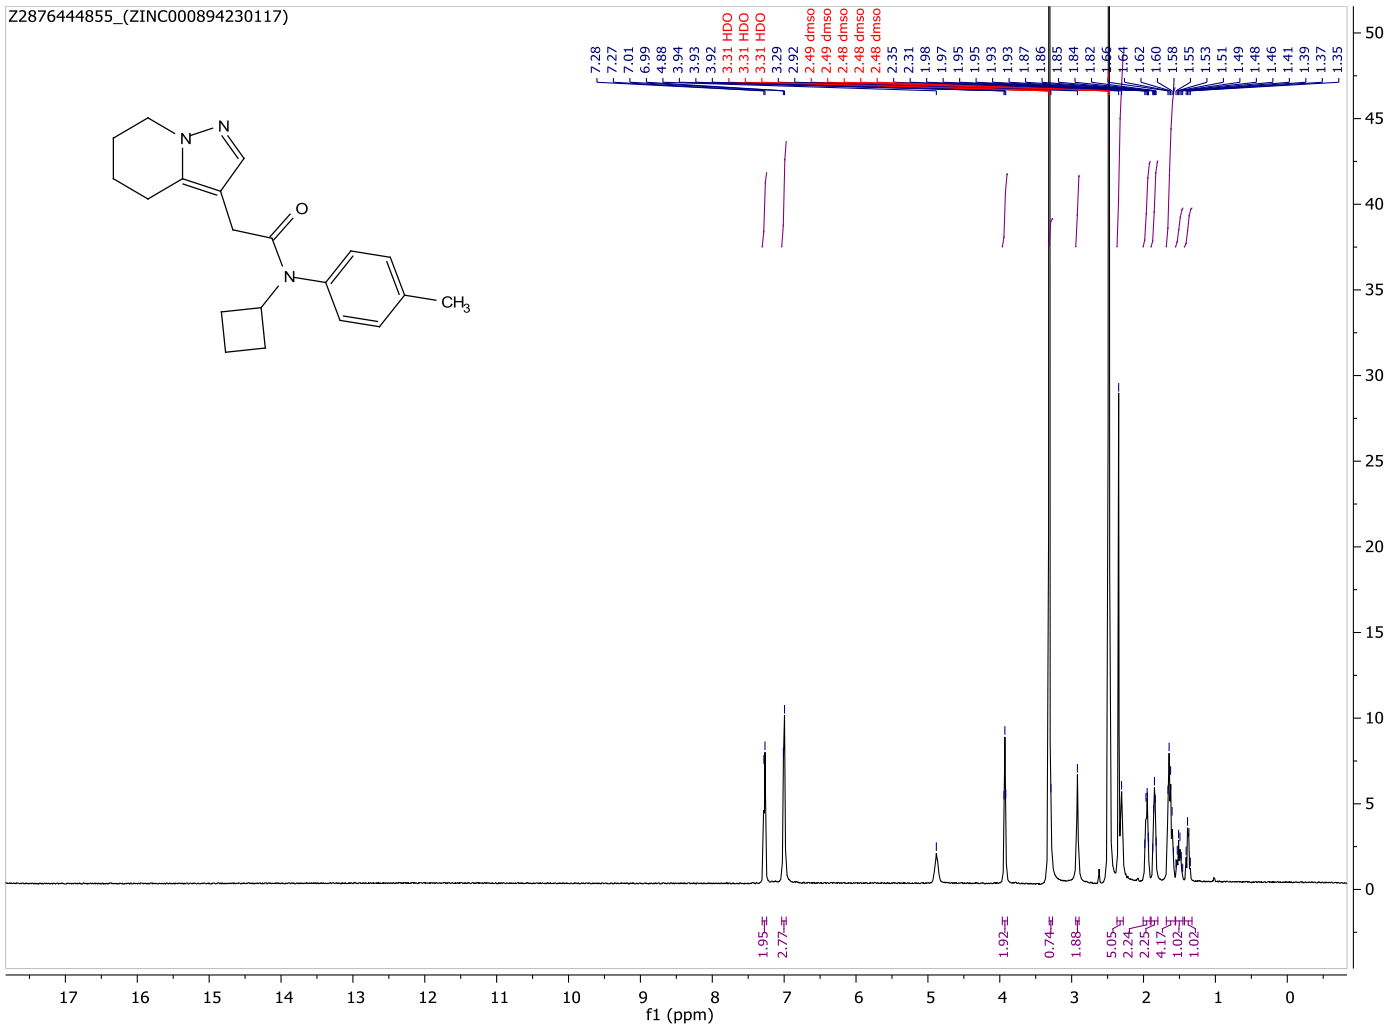

MaxPeak: 100.00%  
Ret\_Time: 1.053 min

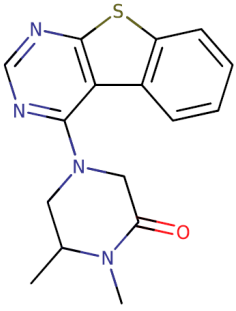

Mol Wt 312.39  
Exact Mass 312.12

| # | Time  | Area%  |
|---|-------|--------|
| 1 | 1.053 | 100.00 |

# Q228009\$3

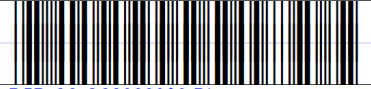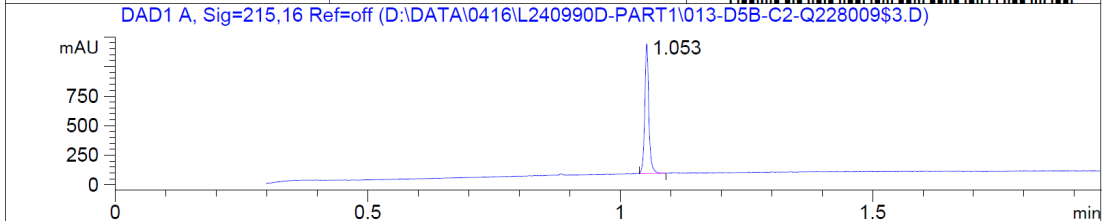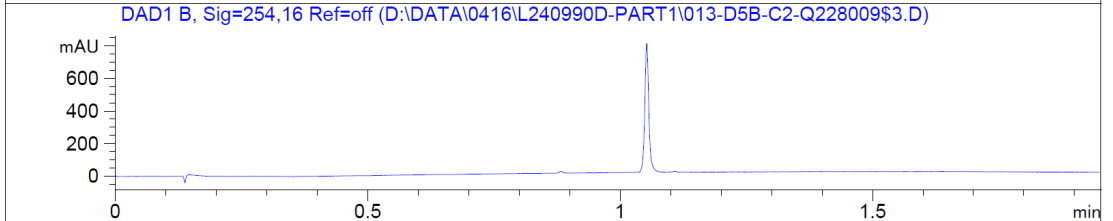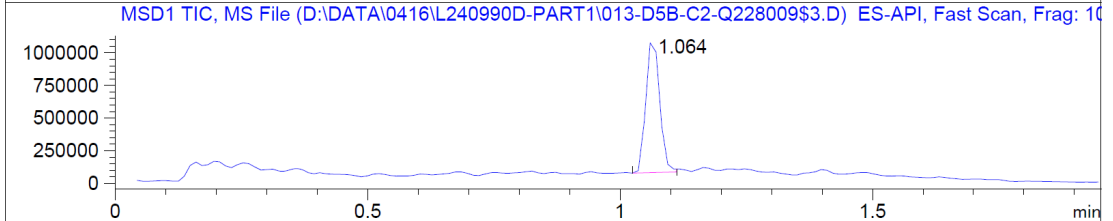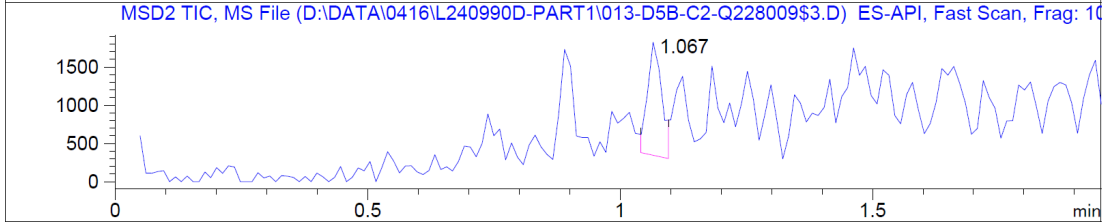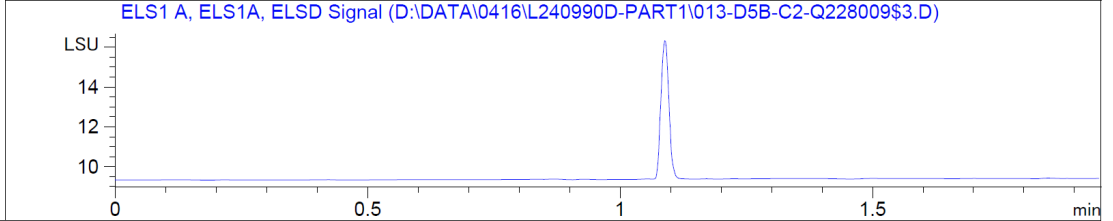

RT 1.064

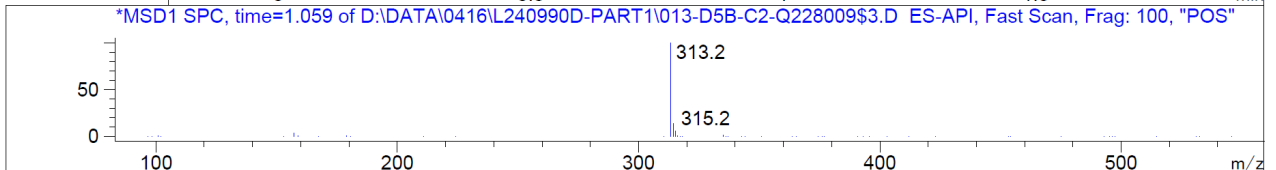

RT 1.067

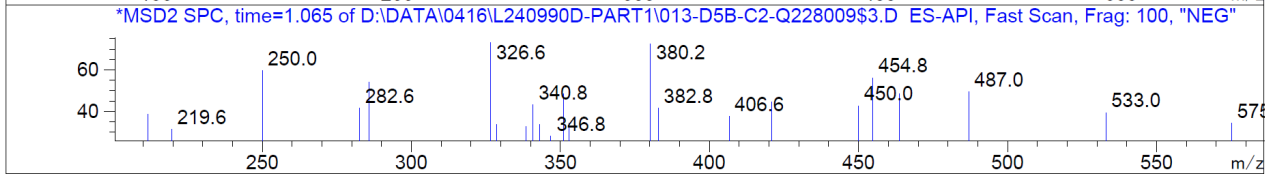

Z2000267872\_(ZINC000336912805)

Z2000267872\_(ZINC000336912805)

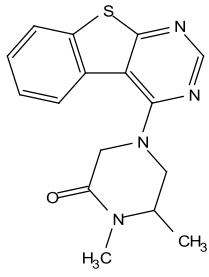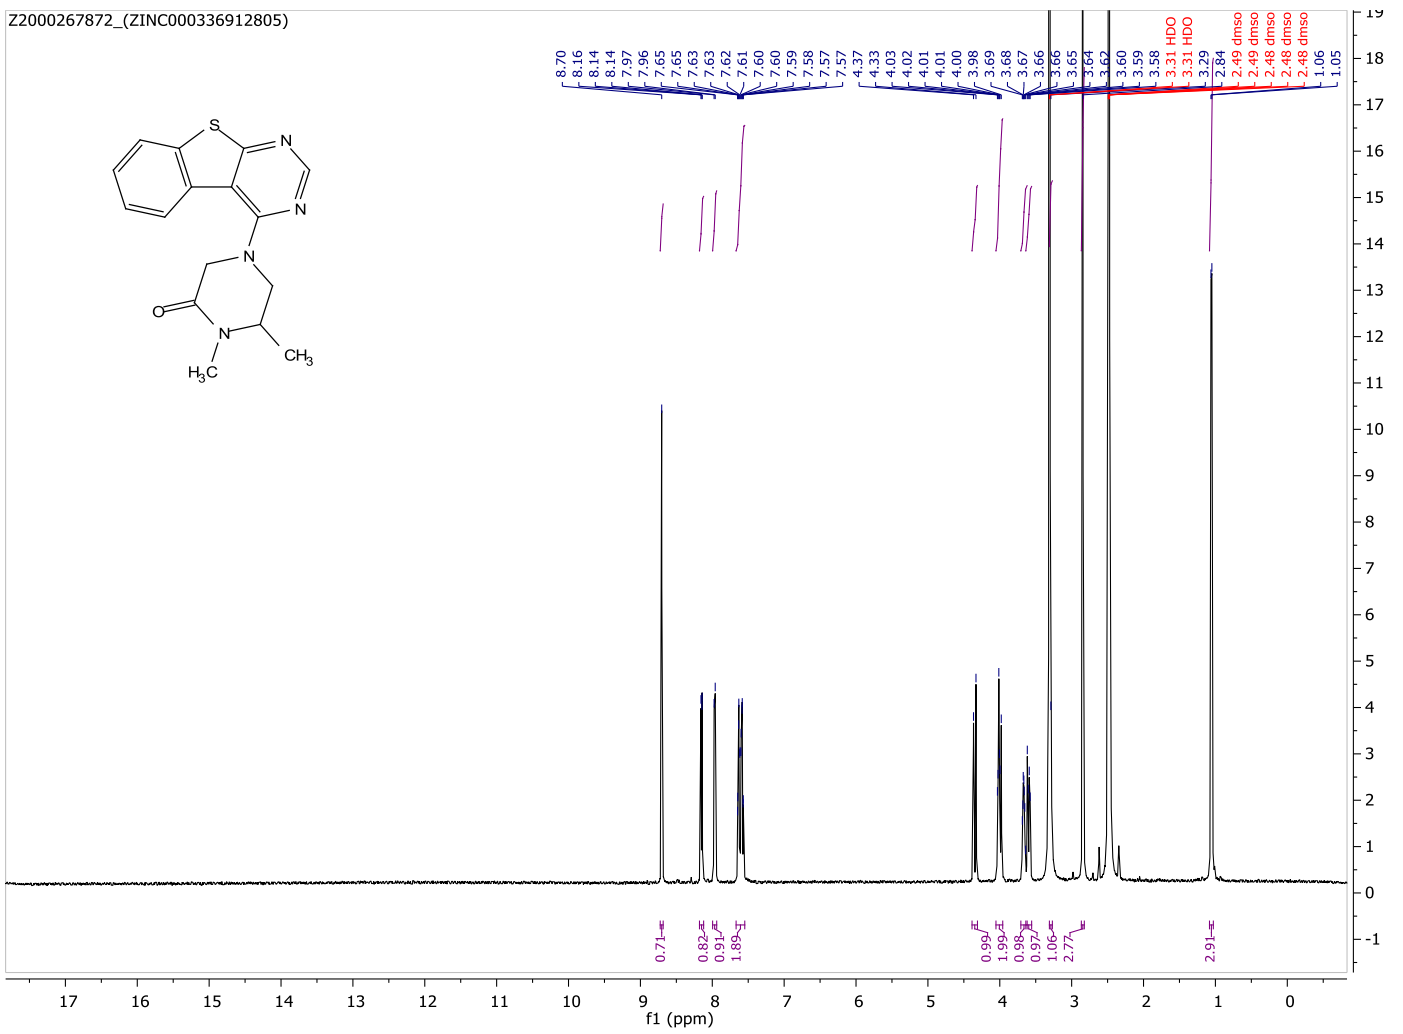

MaxPeak: 97.45%  
Ret\_Time: 1.408 min

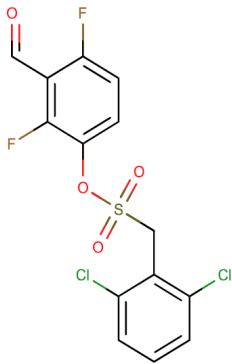

Mol Wt 381.18  
Exact Mass 379.95

| # | Time  | Area% |
|---|-------|-------|
| 1 | 1.408 | 97.45 |
| 2 | 1.461 | 2.55  |

Q260270\$3

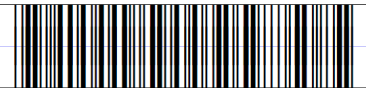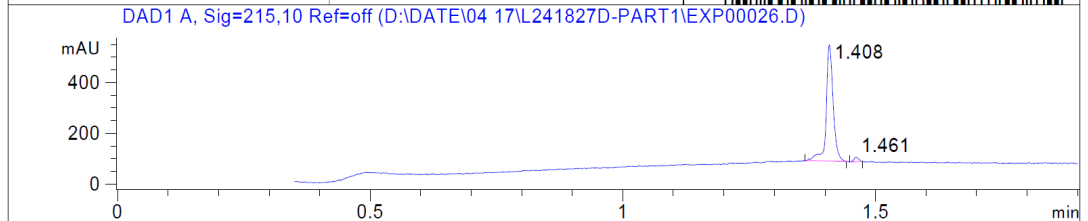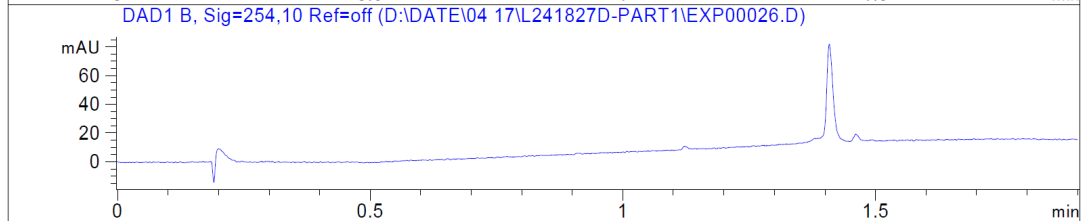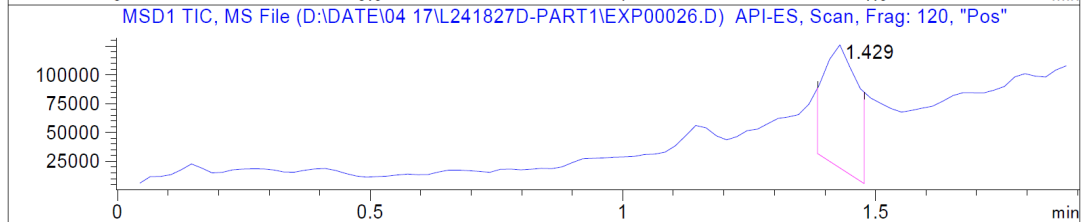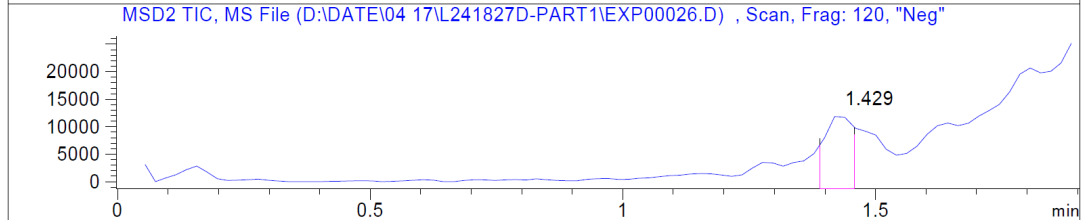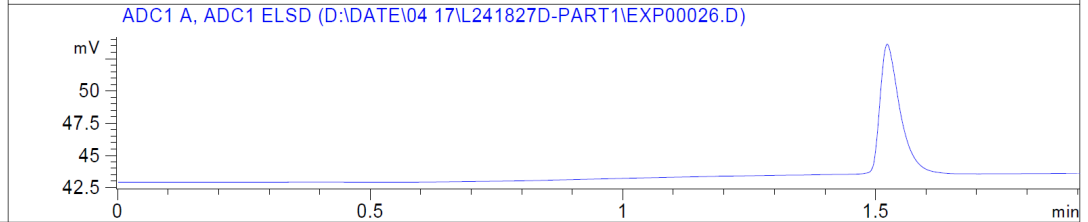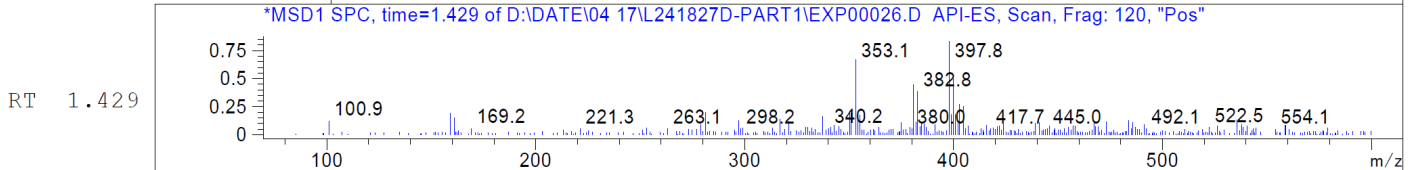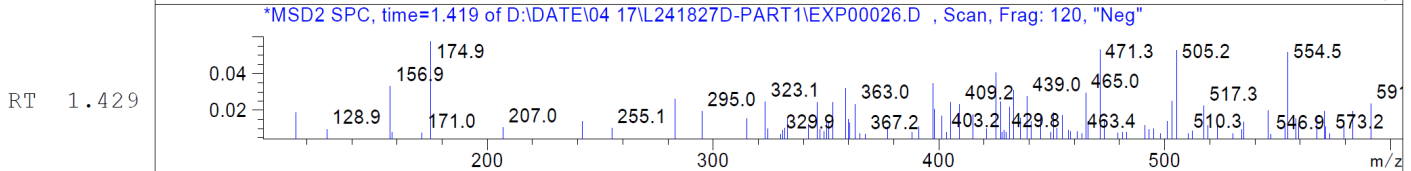

Z1958664470\_(ZINC000795258204)

Z1958664470\_(ZINC000795258204)

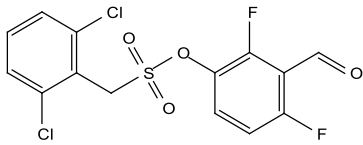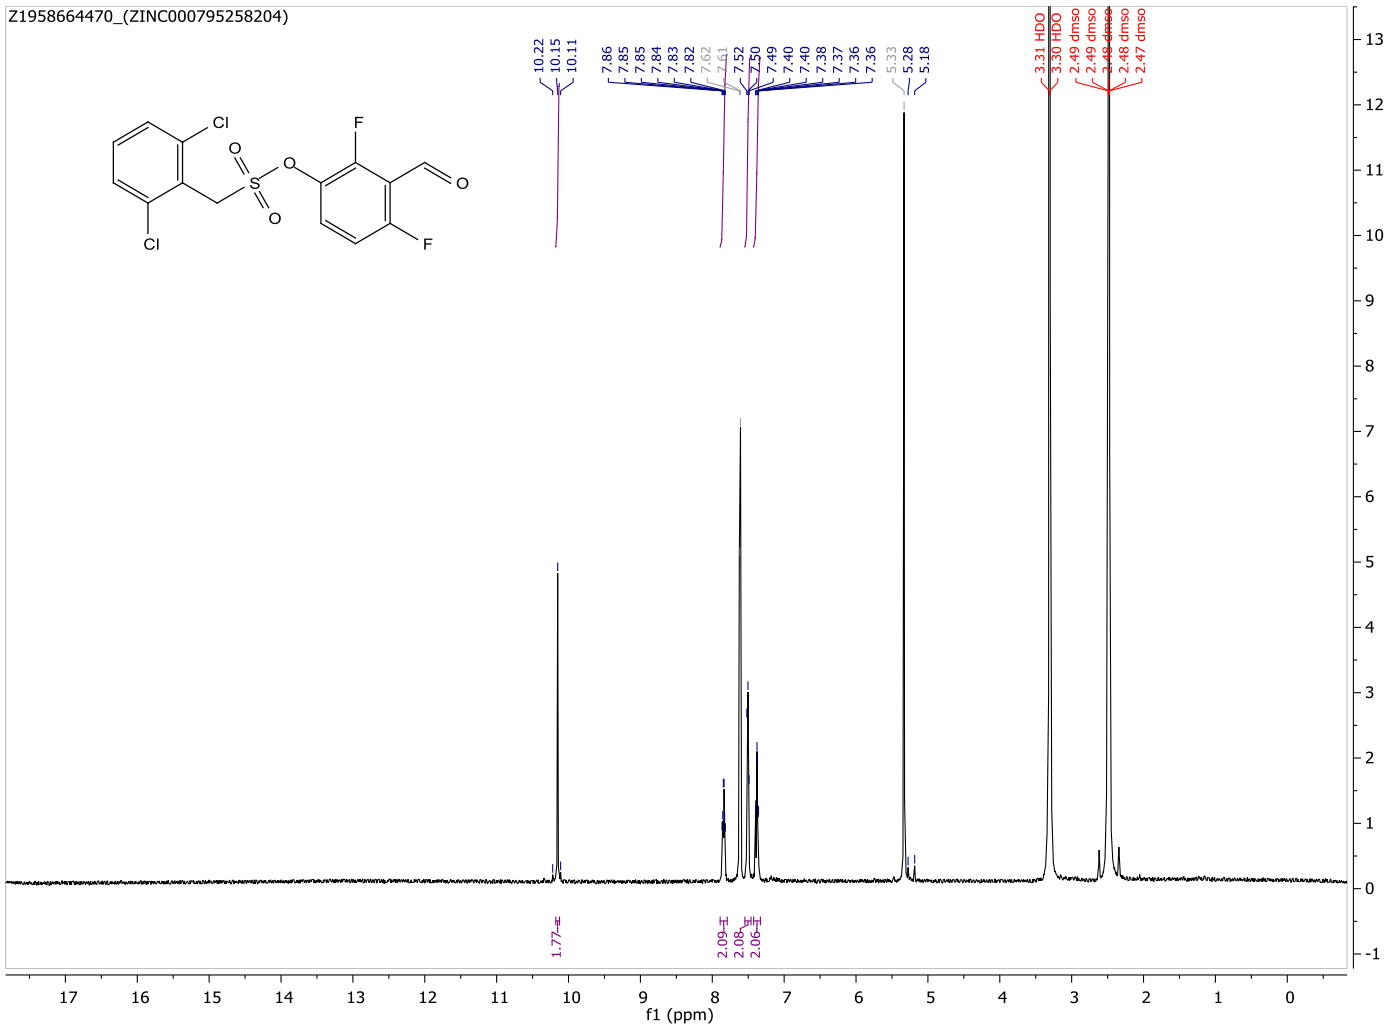



# Q260236\$1

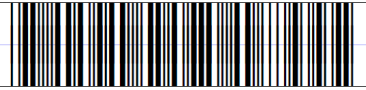

MaxPeak: 100.00%  
Ret\_Time: 1.212 min

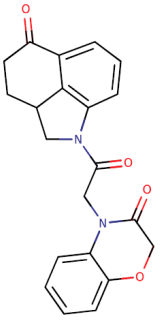

Mol Wt 362.38  
Exact Mass 362.14

| # | Time  | Area%  |
|---|-------|--------|
| 1 | 1.212 | 100.00 |

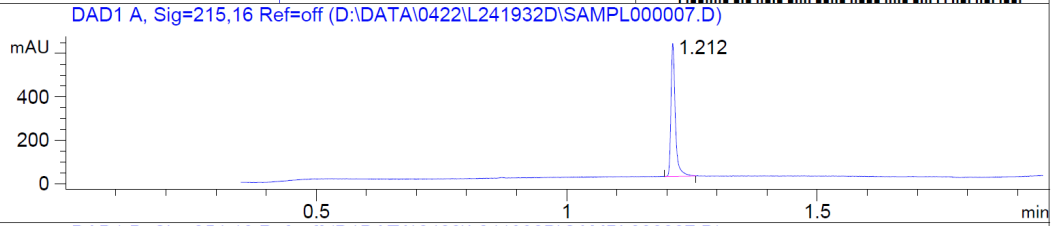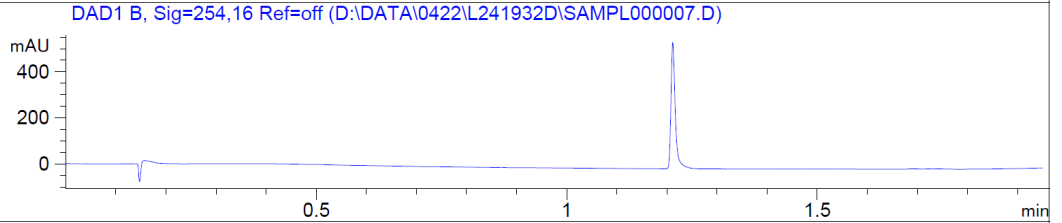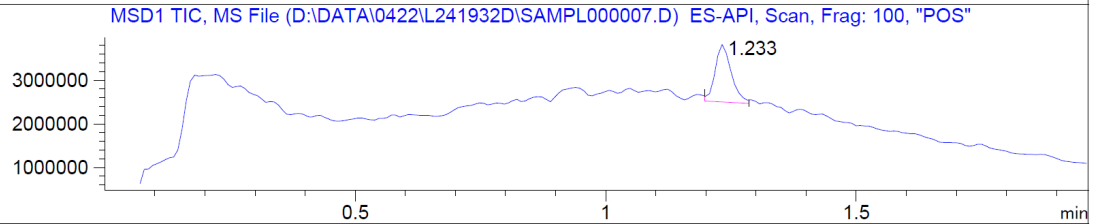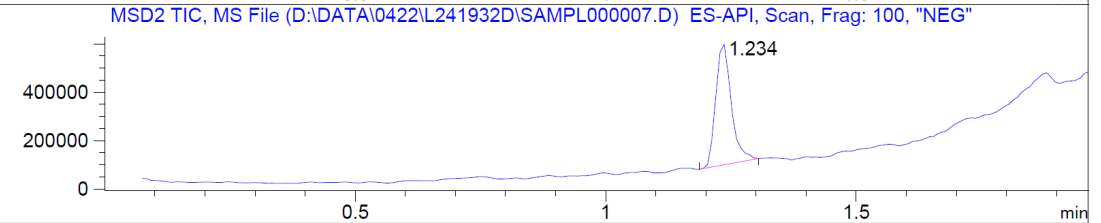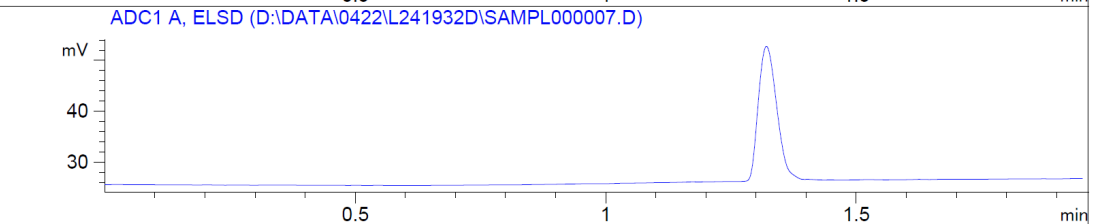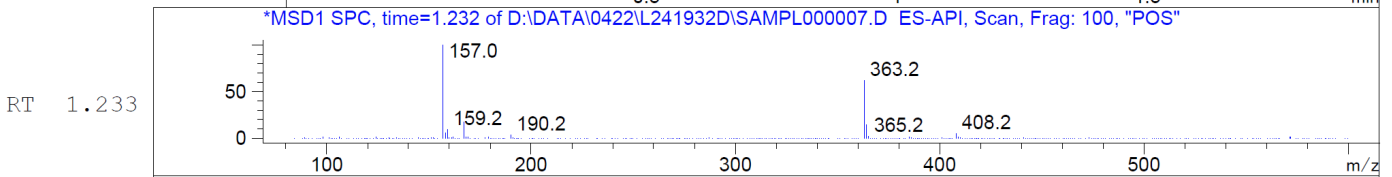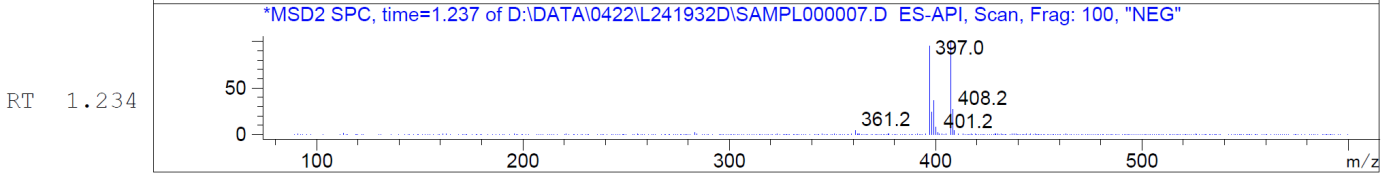

Z1697490576\_(ZINC000274326055)

Z1697490576\_(ZINC000274326055)

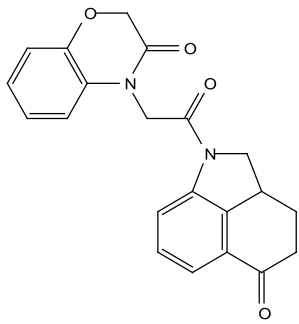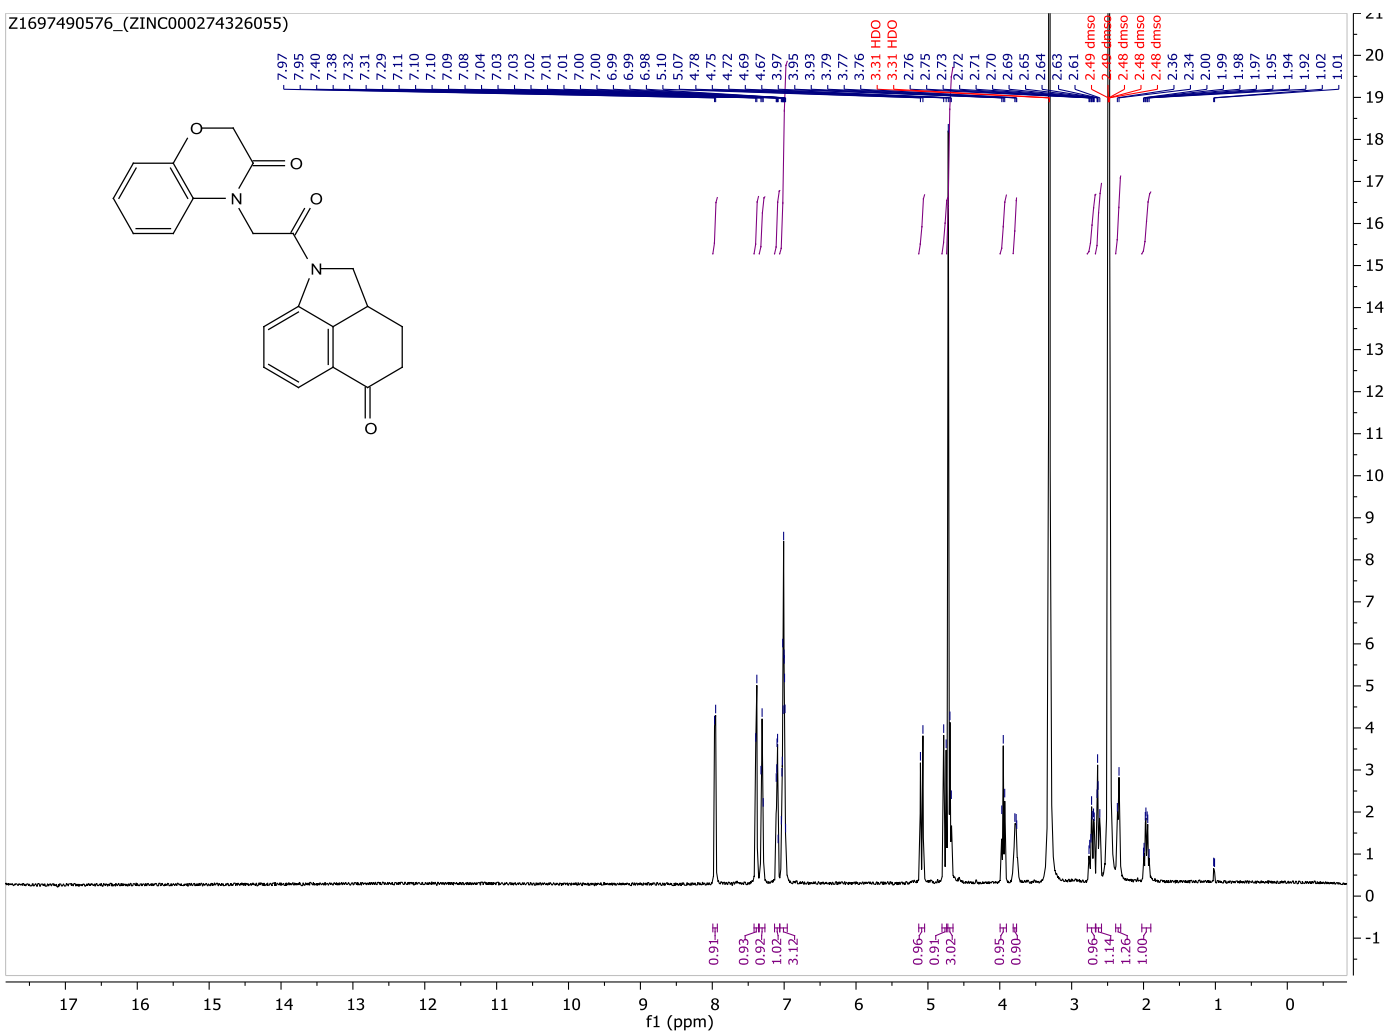

# Q260188\$1

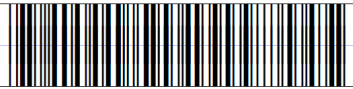

MaxPeak: 100.00%  
Ret\_Time: 1.204 min

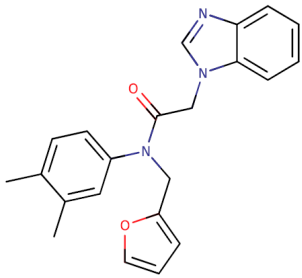

**Mol Wt** 359.42  
**Exact Mass** 359.19

| # | Time  | Area%  |
|---|-------|--------|
| 1 | 1.204 | 100.00 |

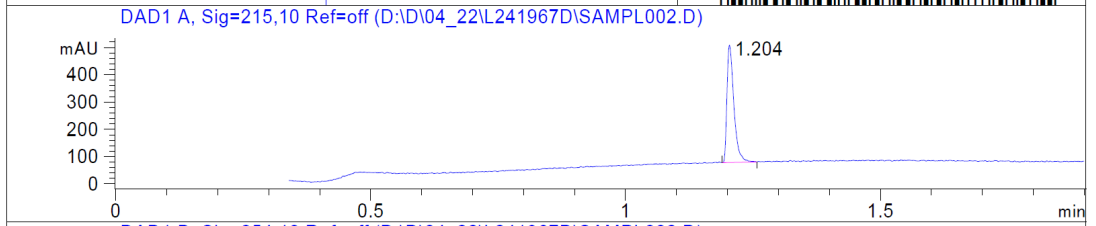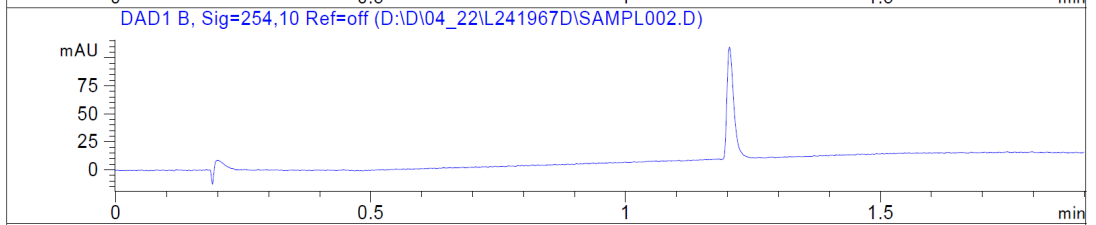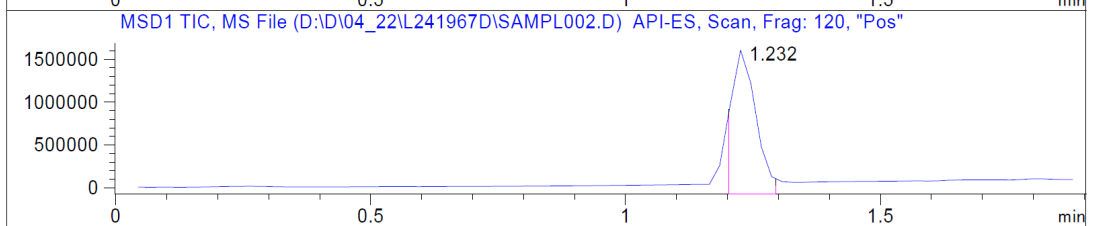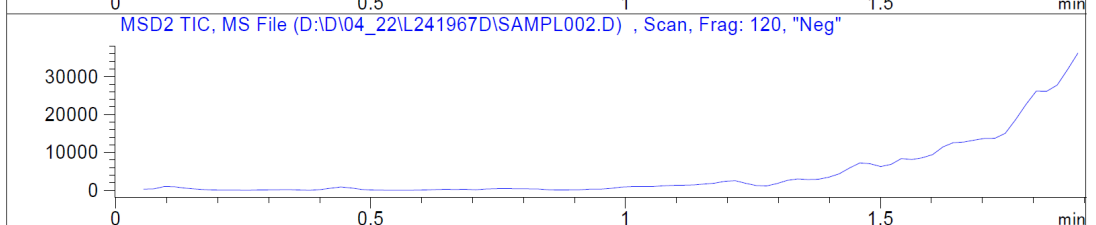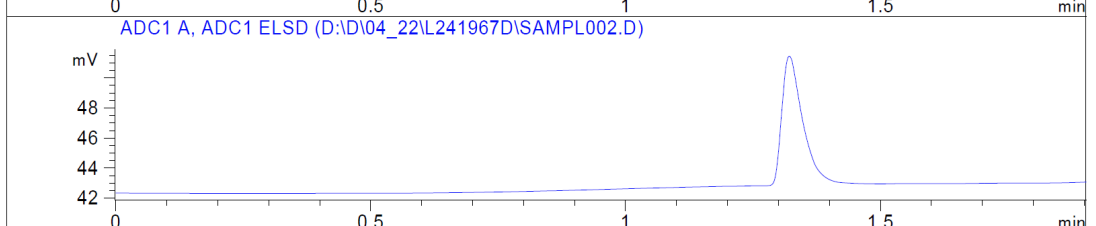

RT 1.232

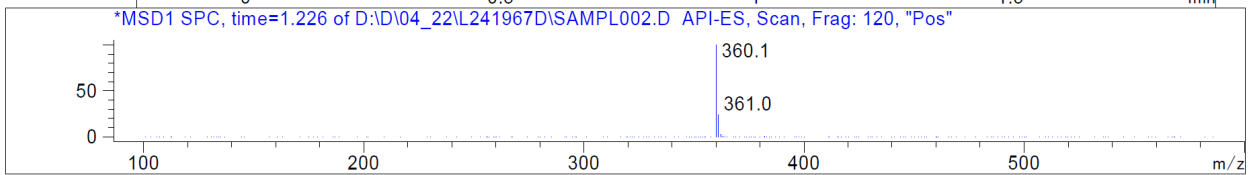

Z430141838\_(ZINC000915668084)

Z430141838\_(ZINC000915668084)

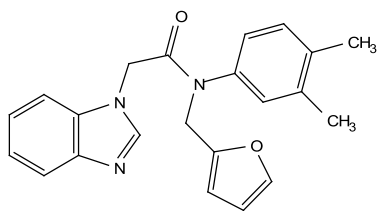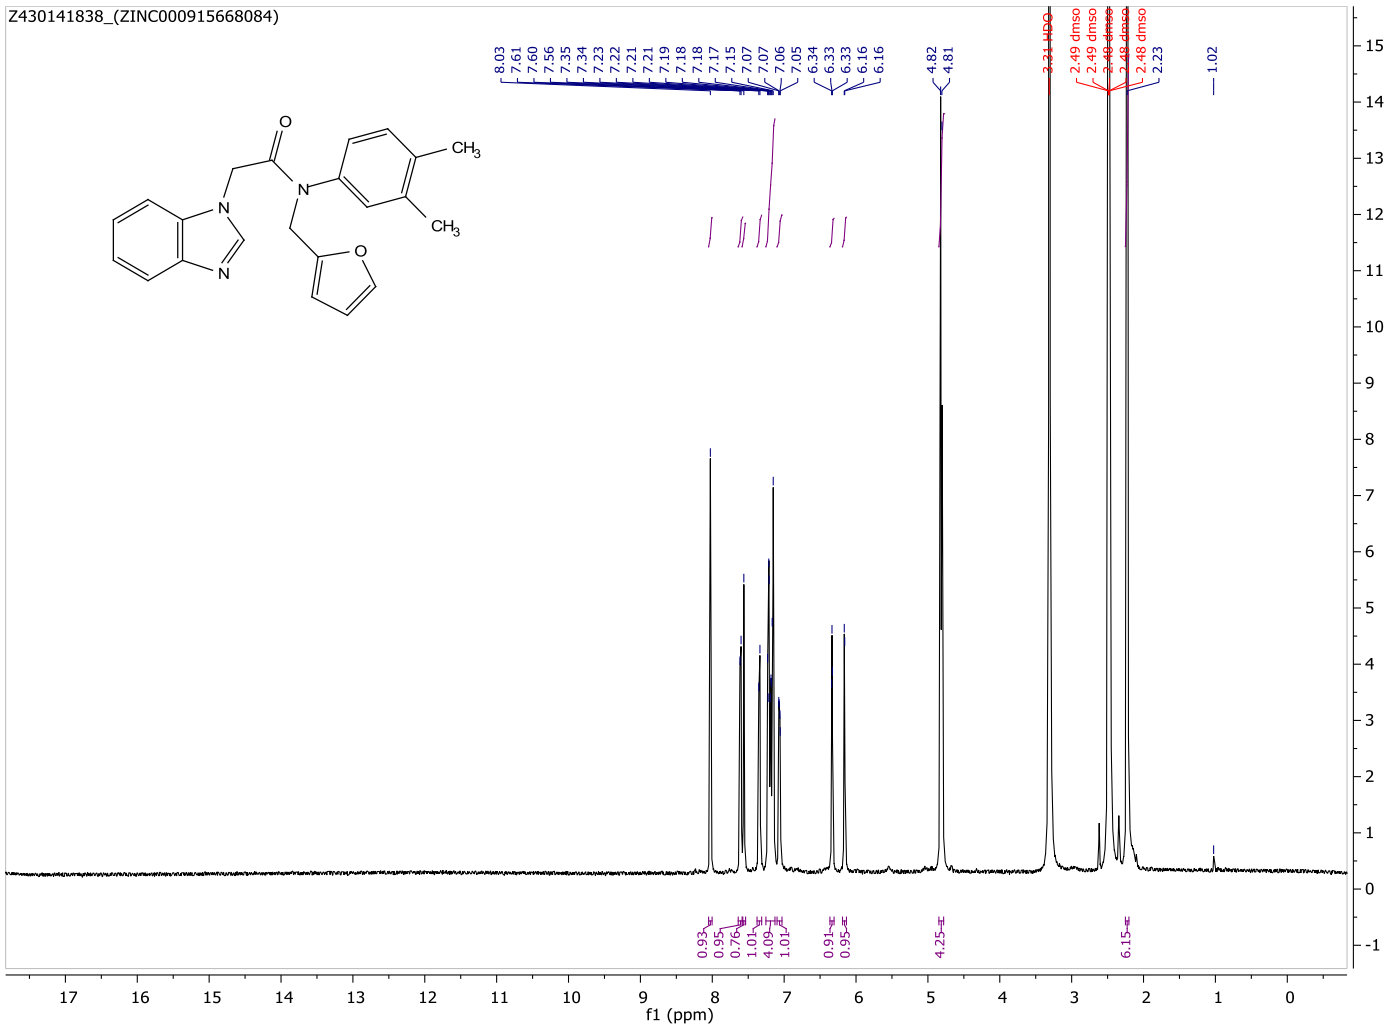

MaxPeak: 96.66%  
Ret\_Time: 1.411 min

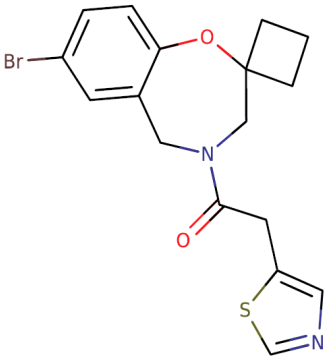

Mol Wt 393.3  
Exact Mass 394.04

| # | Time  | Area% |
|---|-------|-------|
| 1 | 1.411 | 96.66 |
| 2 | 1.585 | 3.34  |

Q260276\$1

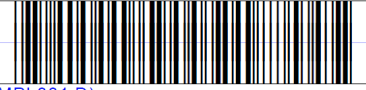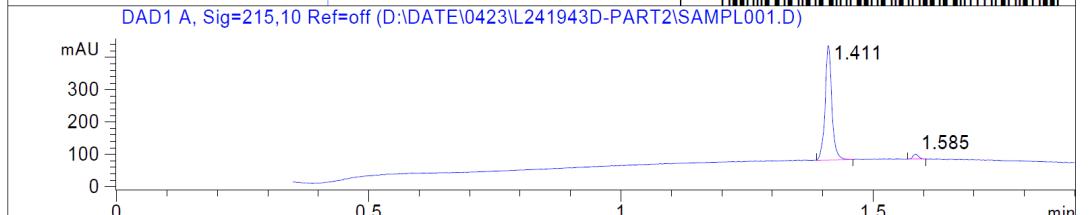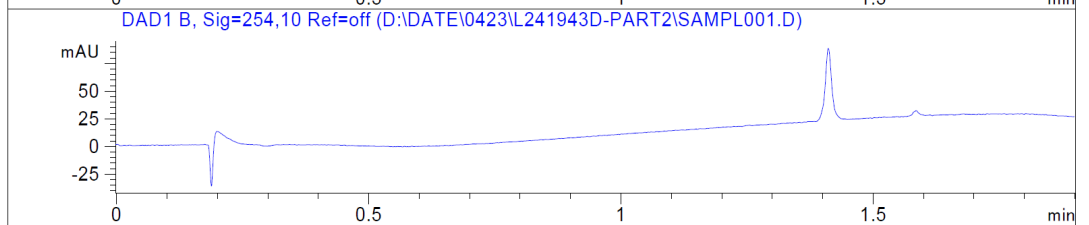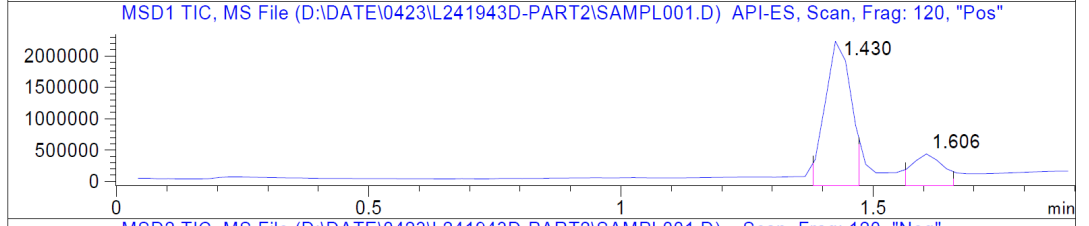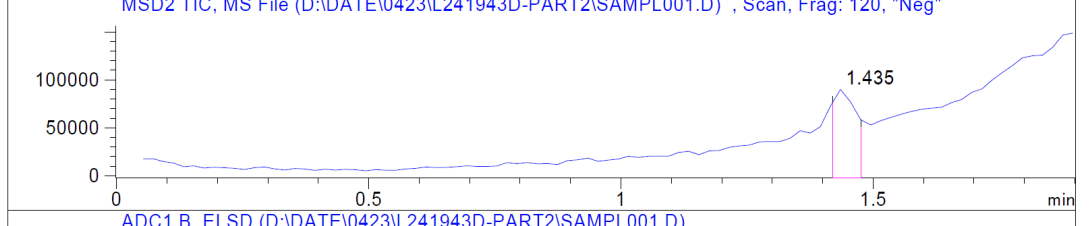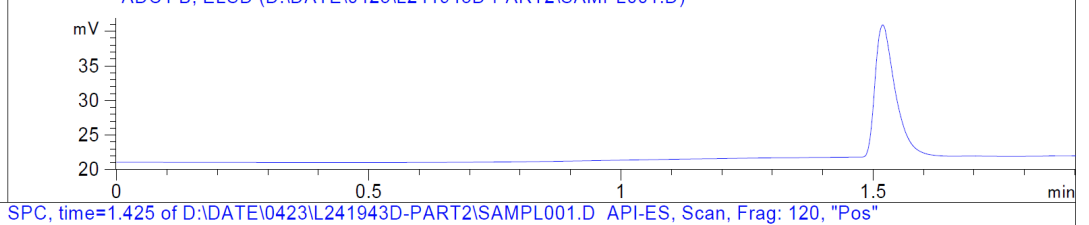

RT 1.430

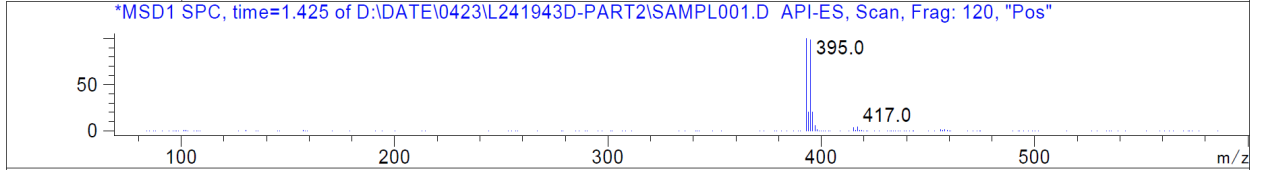

RT 1.606

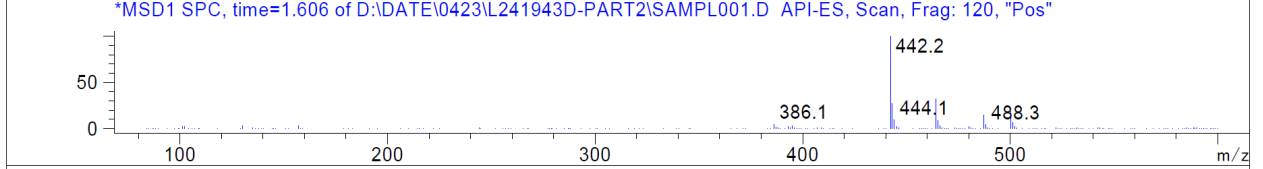

RT 1.435

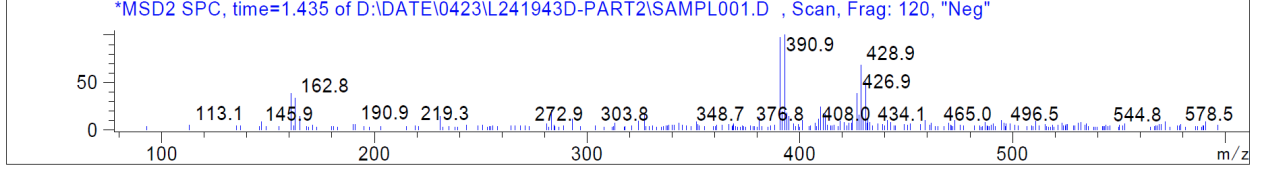

Z2931822383\_(ZINC000928186863)

Z2931822383\_(ZINC000928186863)

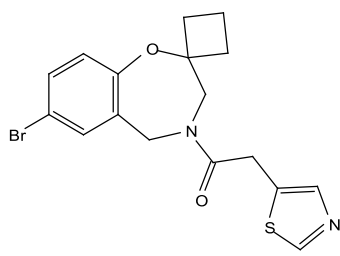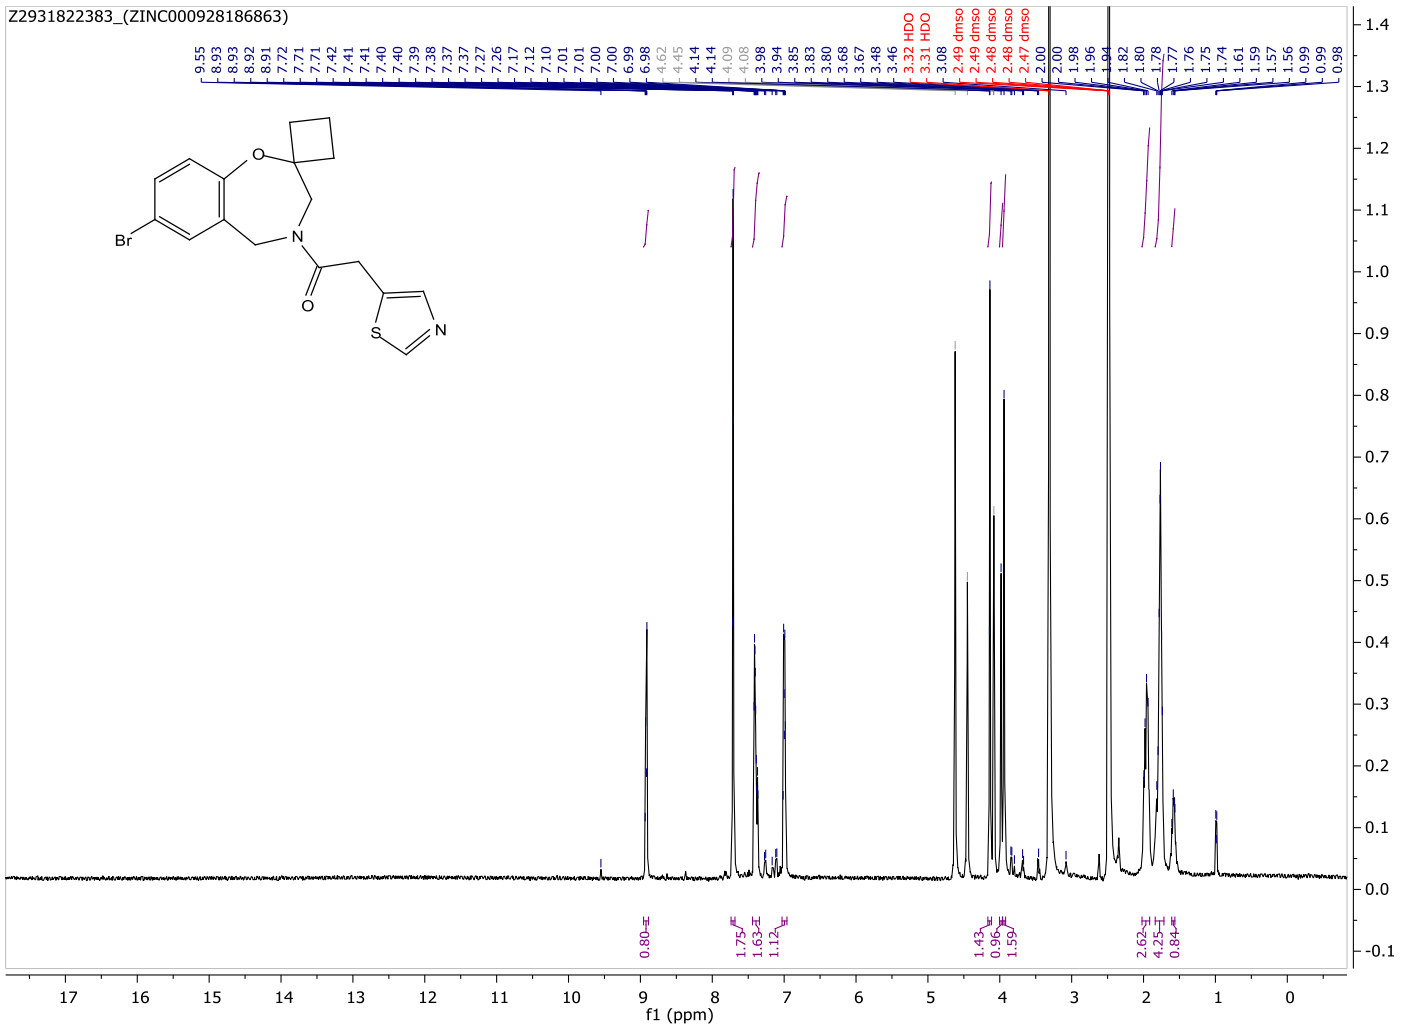

MaxPeak: 100.00%  
Ret\_Time: 1.041 min

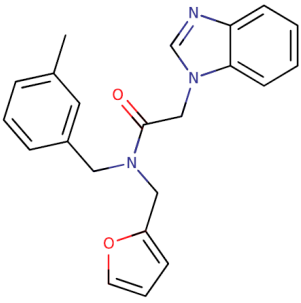

Mol Wt 359.42  
Exact Mass 359.19

| # | Time  | Area%  |
|---|-------|--------|
| 1 | 1.041 | 100.00 |

# H2334205

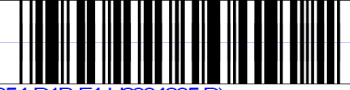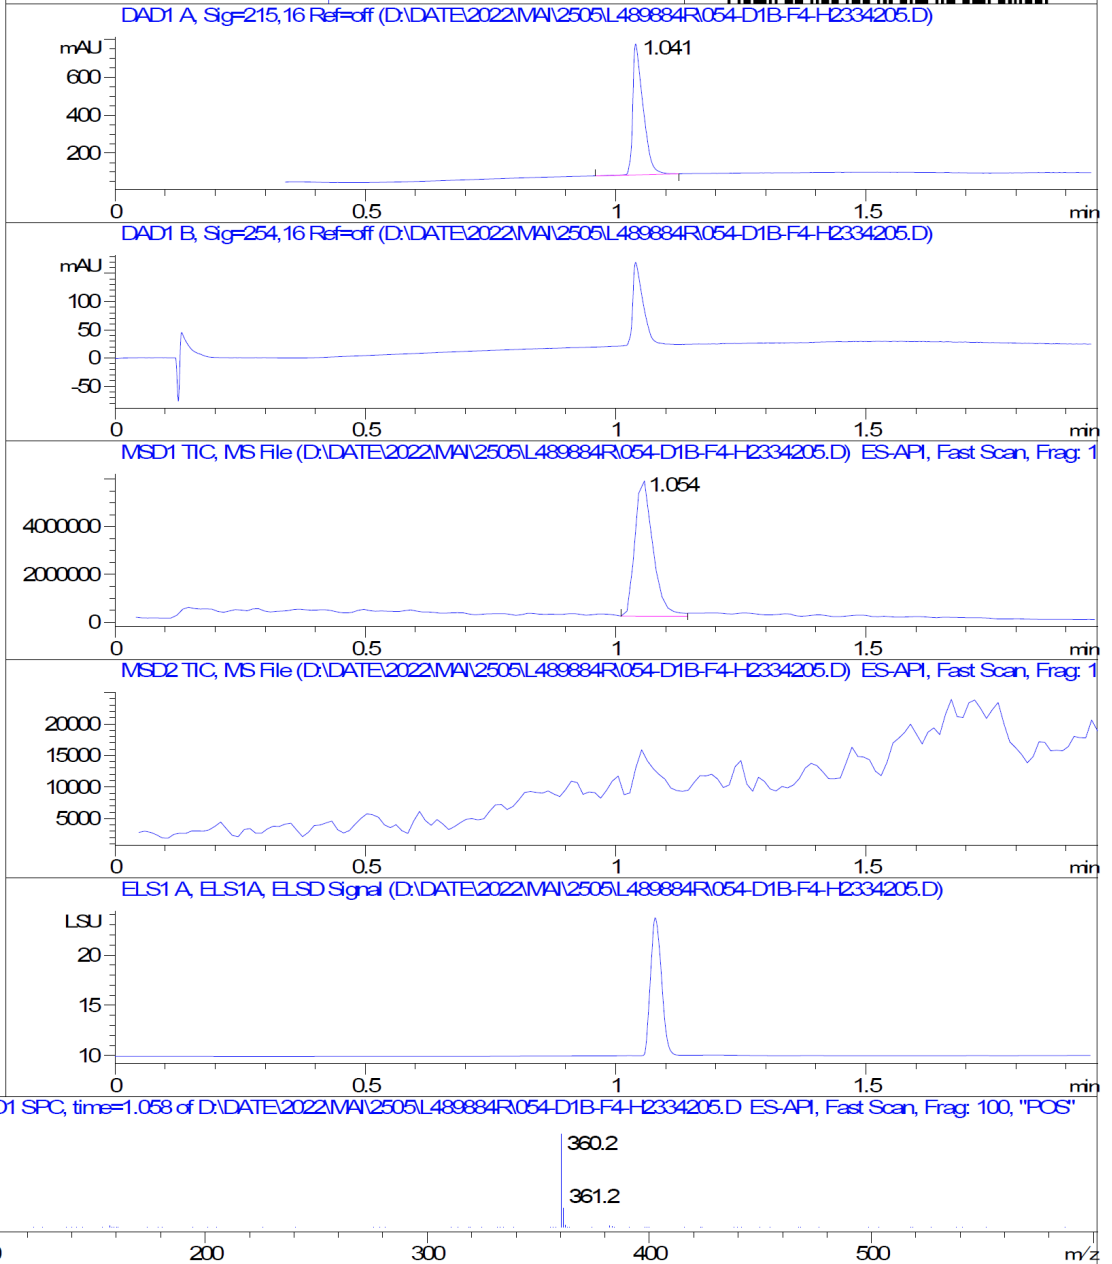

RT 1.054

Z430143532\_(ZINC000512479458)

Z430143532\_(ZINC000512479458)

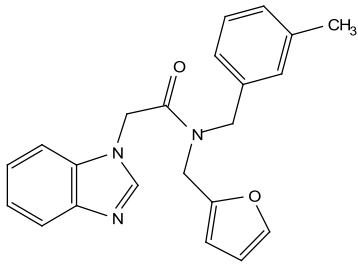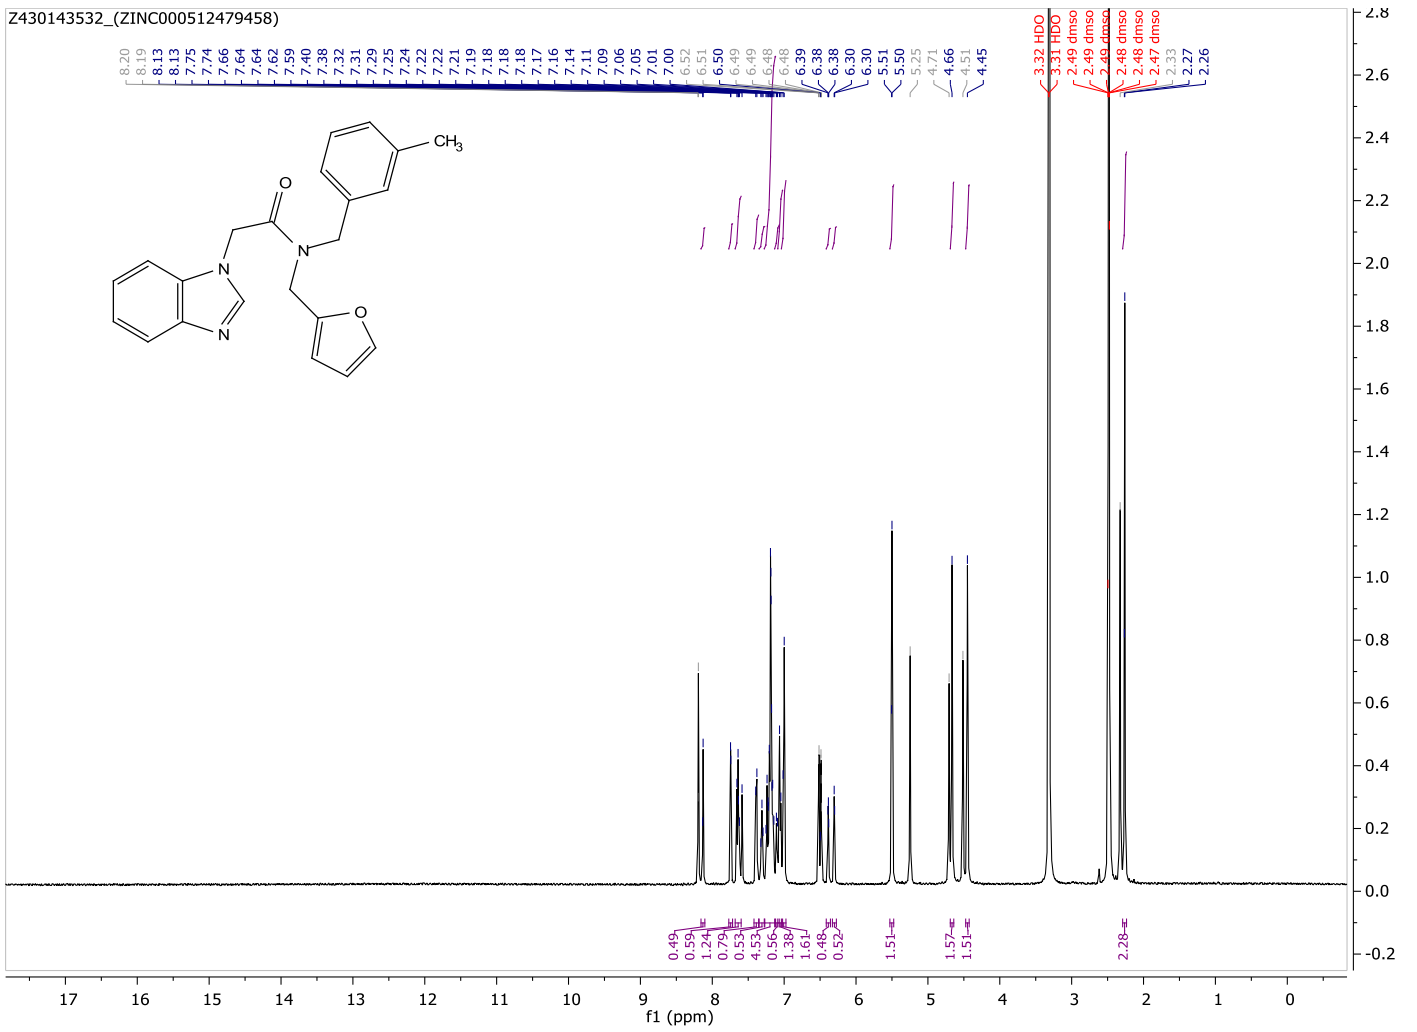



MaxPeak: 100.00%  
Ret\_Time: 1.099 min

Q260300\$2

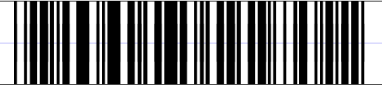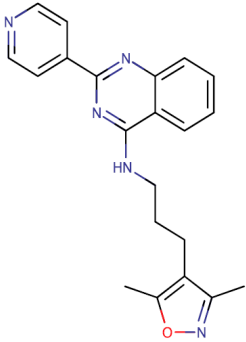

Mol Wt 359.42

Exact Mass 359.2

| # | Time  | Area%  |
|---|-------|--------|
| 1 | 1.099 | 100.00 |

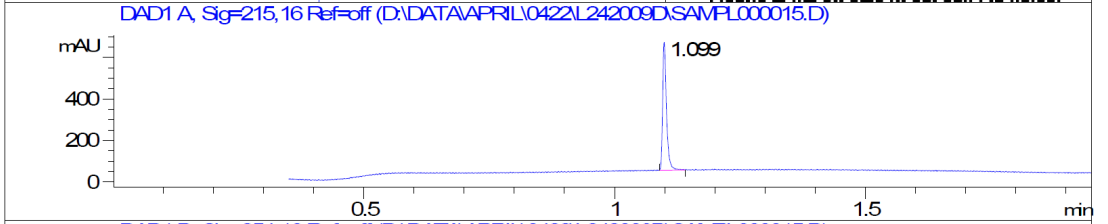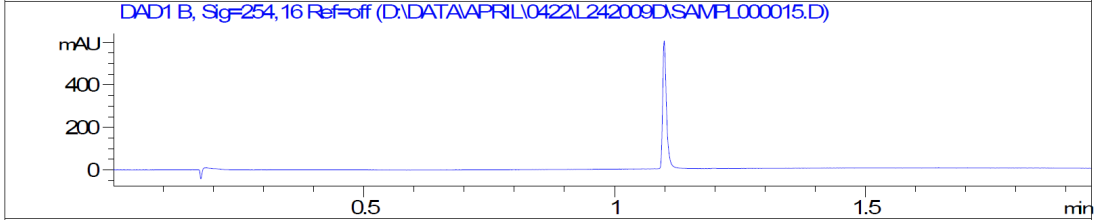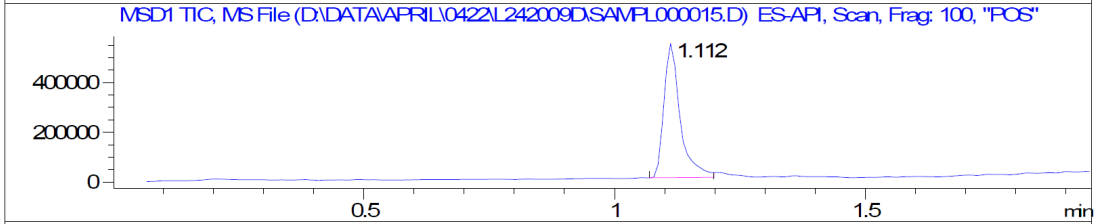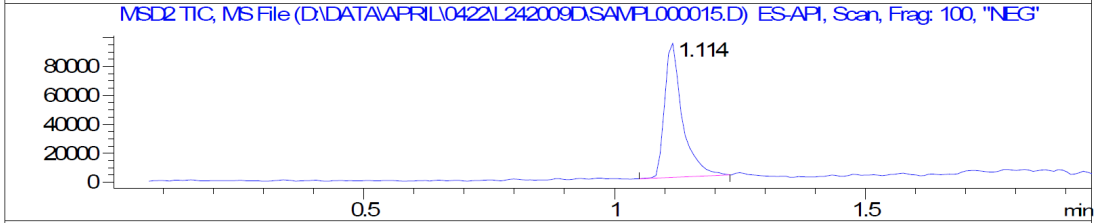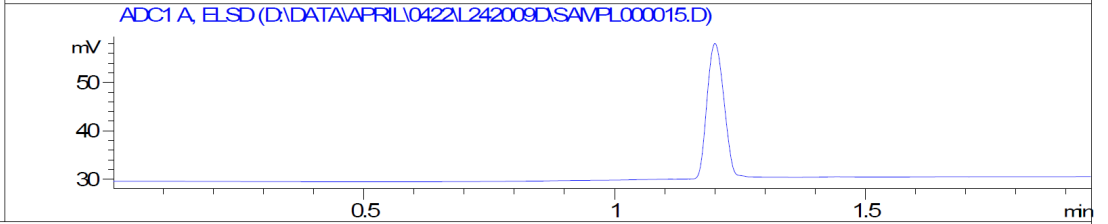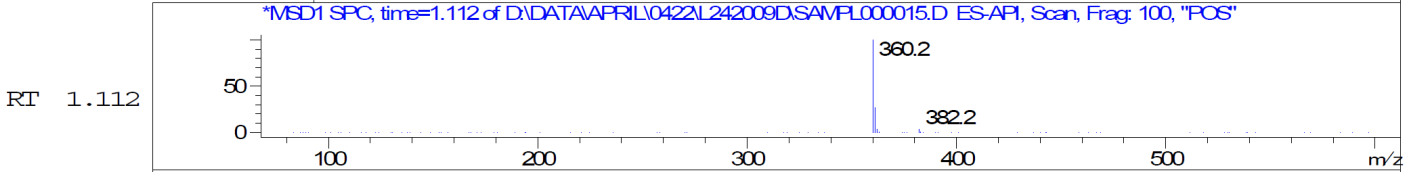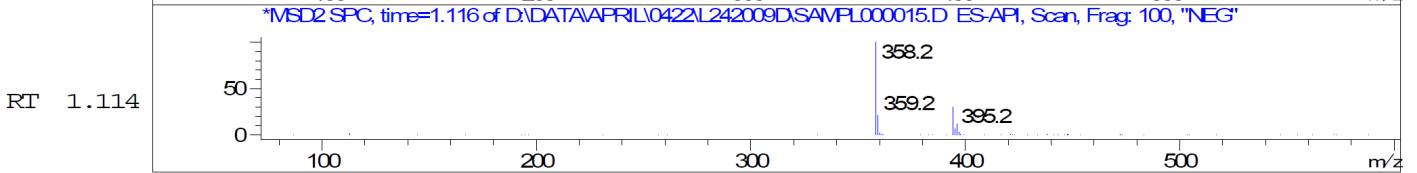

Z1378403257\_(ZINC000301553312)

Z1378403257\_(ZINC000301553312)

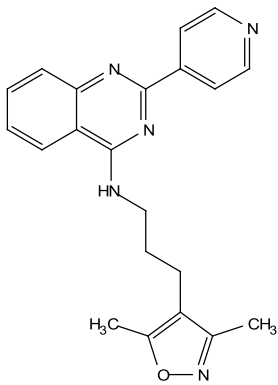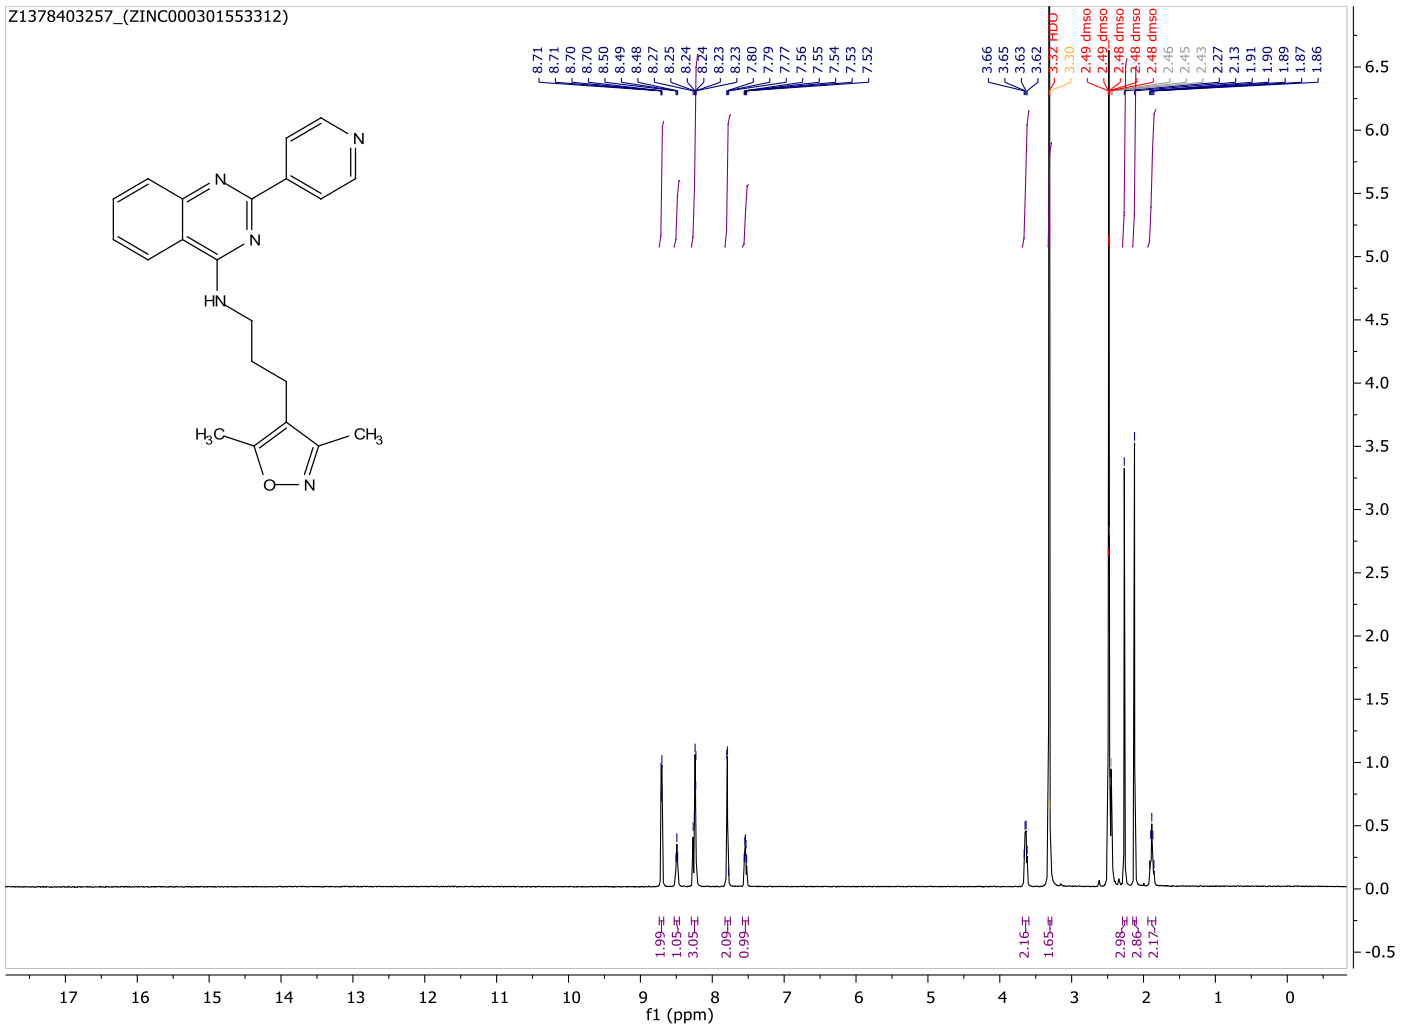

# Q260256\$3

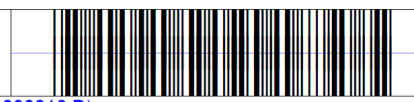

MaxPeak: 100.00%  
Ret\_Time: 1.386 min

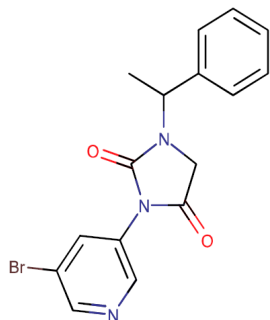

Mol Wt 360.2  
Exact Mass 359.04

| # | Time  | Area%  |
|---|-------|--------|
| 1 | 1.386 | 100.00 |

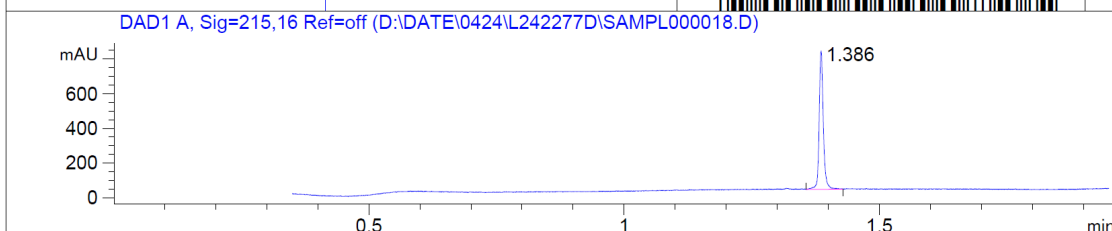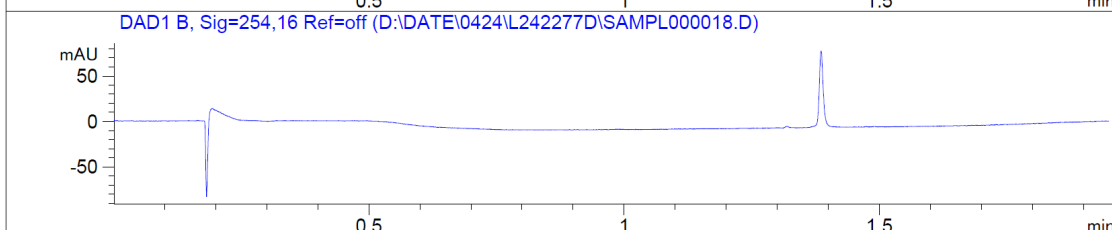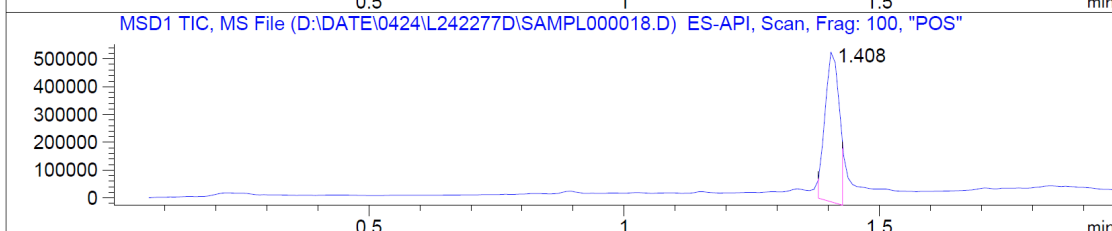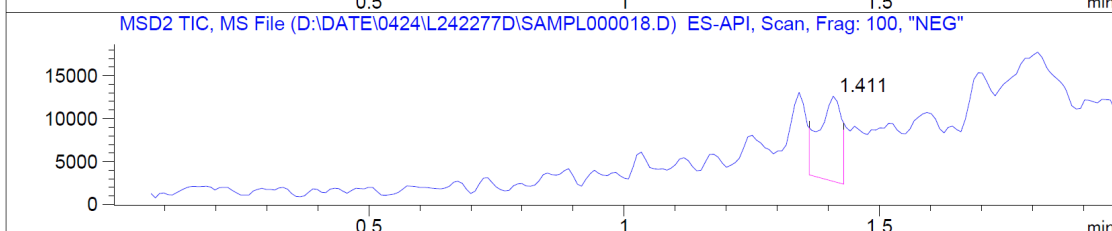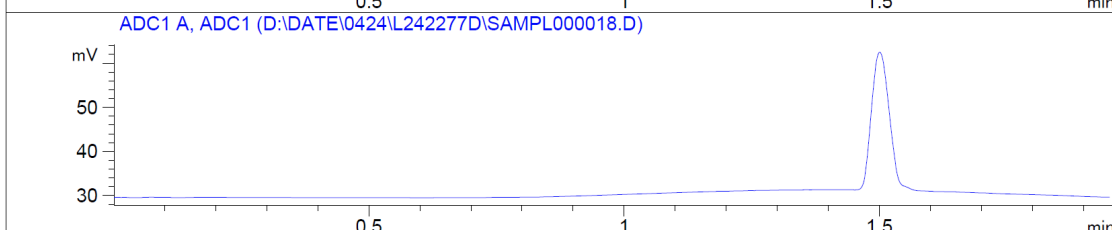

RT 1.408

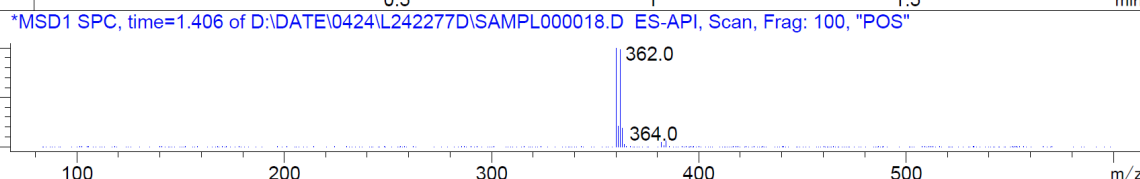

RT 1.411

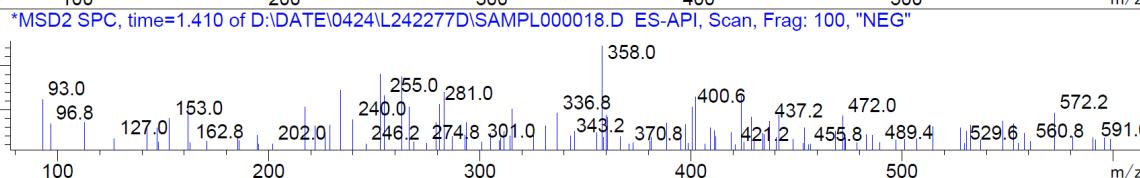

Z2193994640\_(ZINC000813360541)

Z2193994640\_(ZINC000813360541)

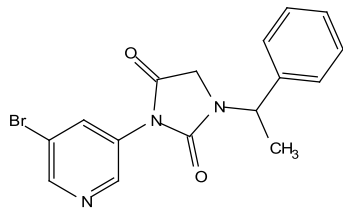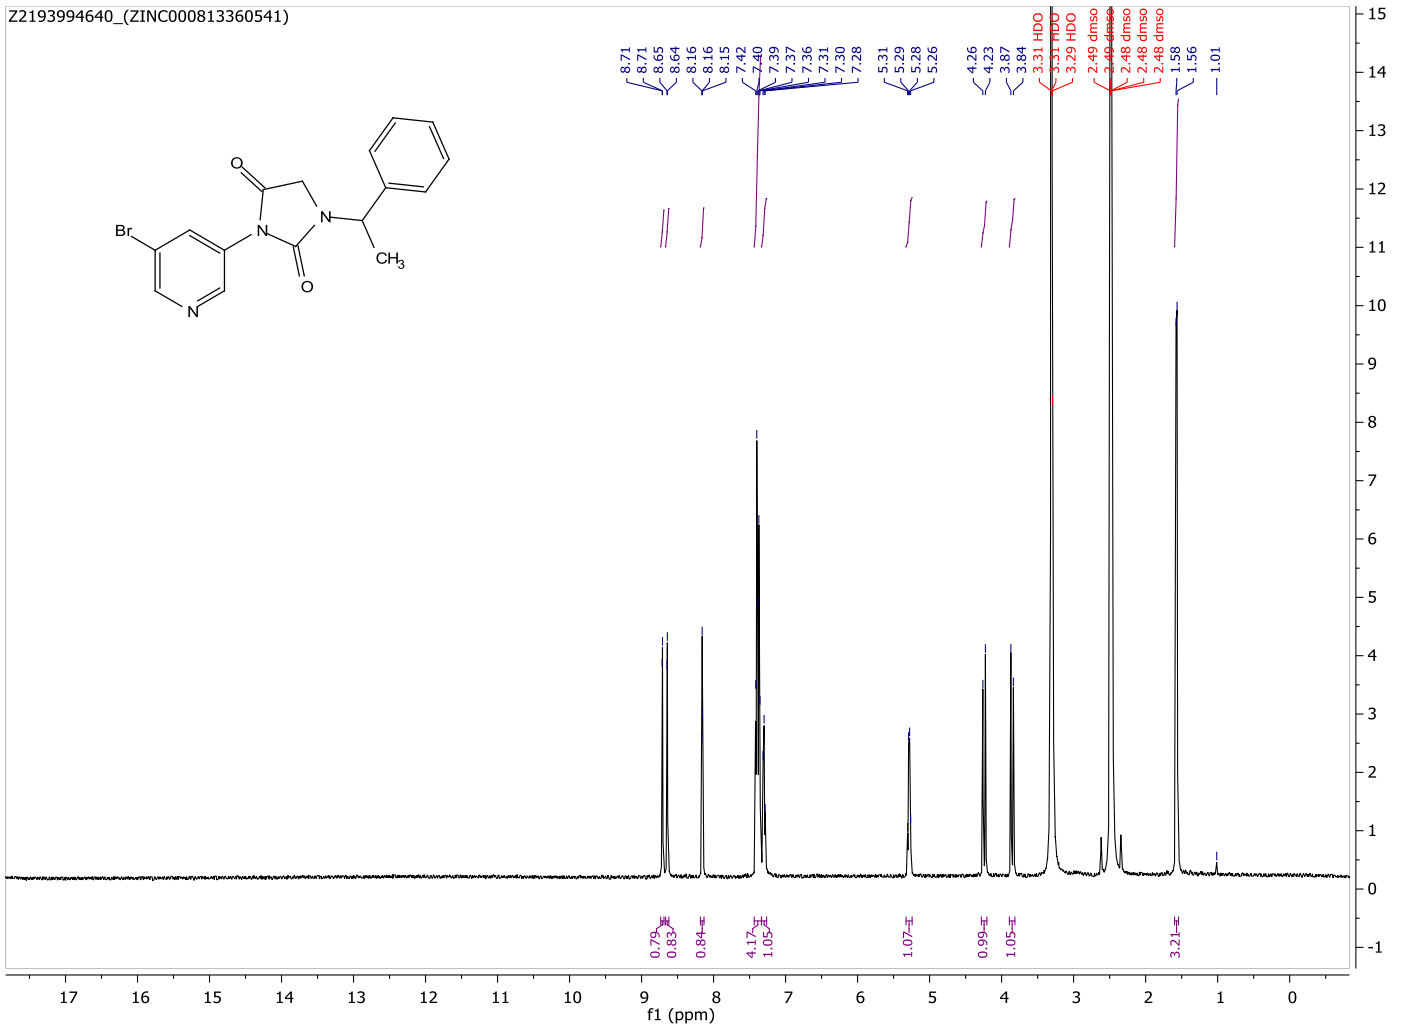

MaxPeak: 100.00%  
 Ret\_Time: 1.291 min

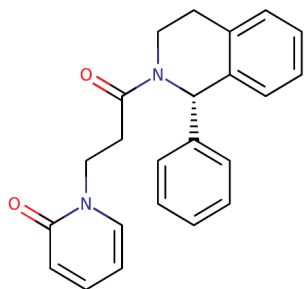

**Mol Wt** 358.43  
**Exact Mass** 358.2

| # | Time  | Area%  |
|---|-------|--------|
| 1 | 1.291 | 100.00 |

Q260233\$2

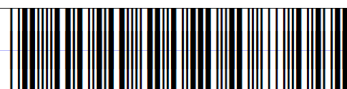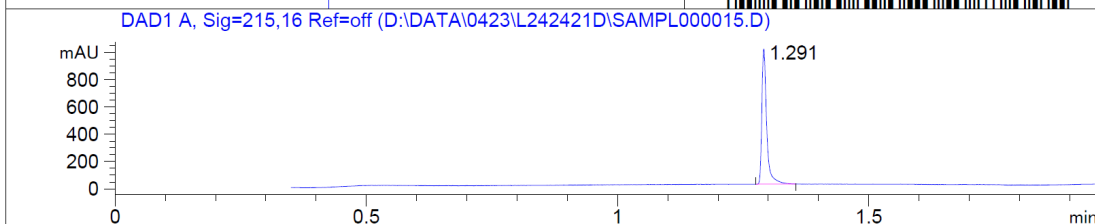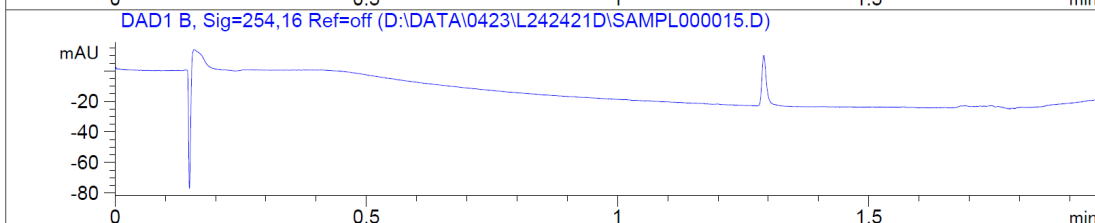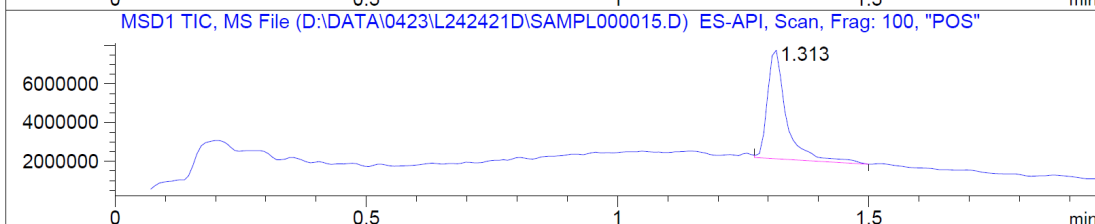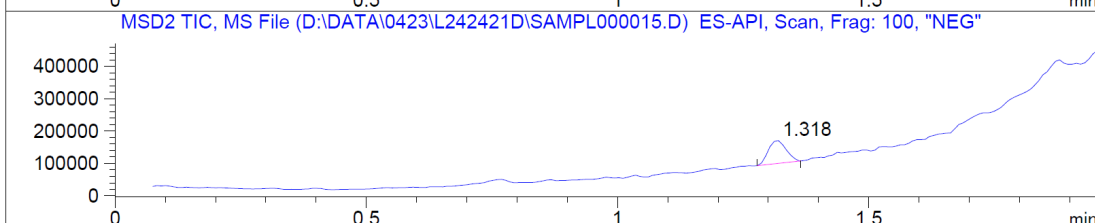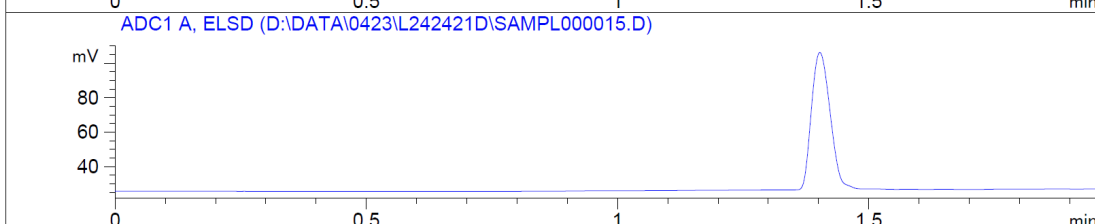

RT 1.313

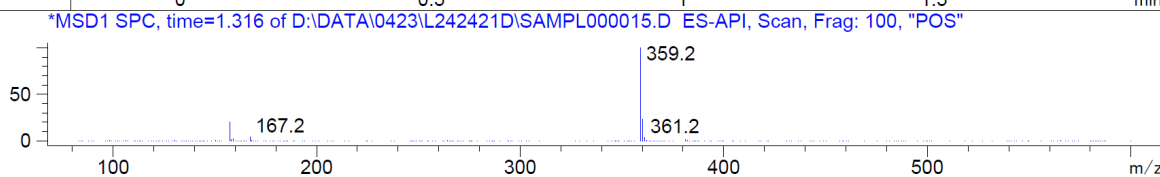

RT 1.318

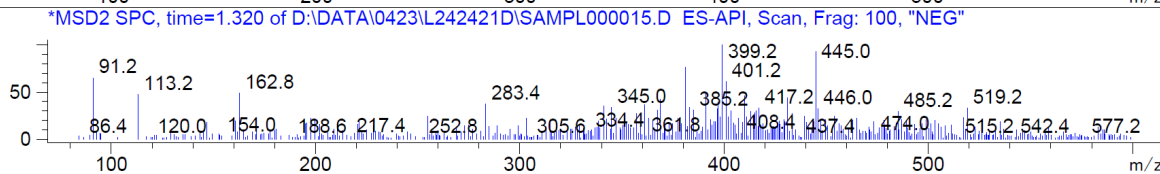

Z2232119003\_(ZINC000594542103)

Z2232119003\_(ZINC000594542103)

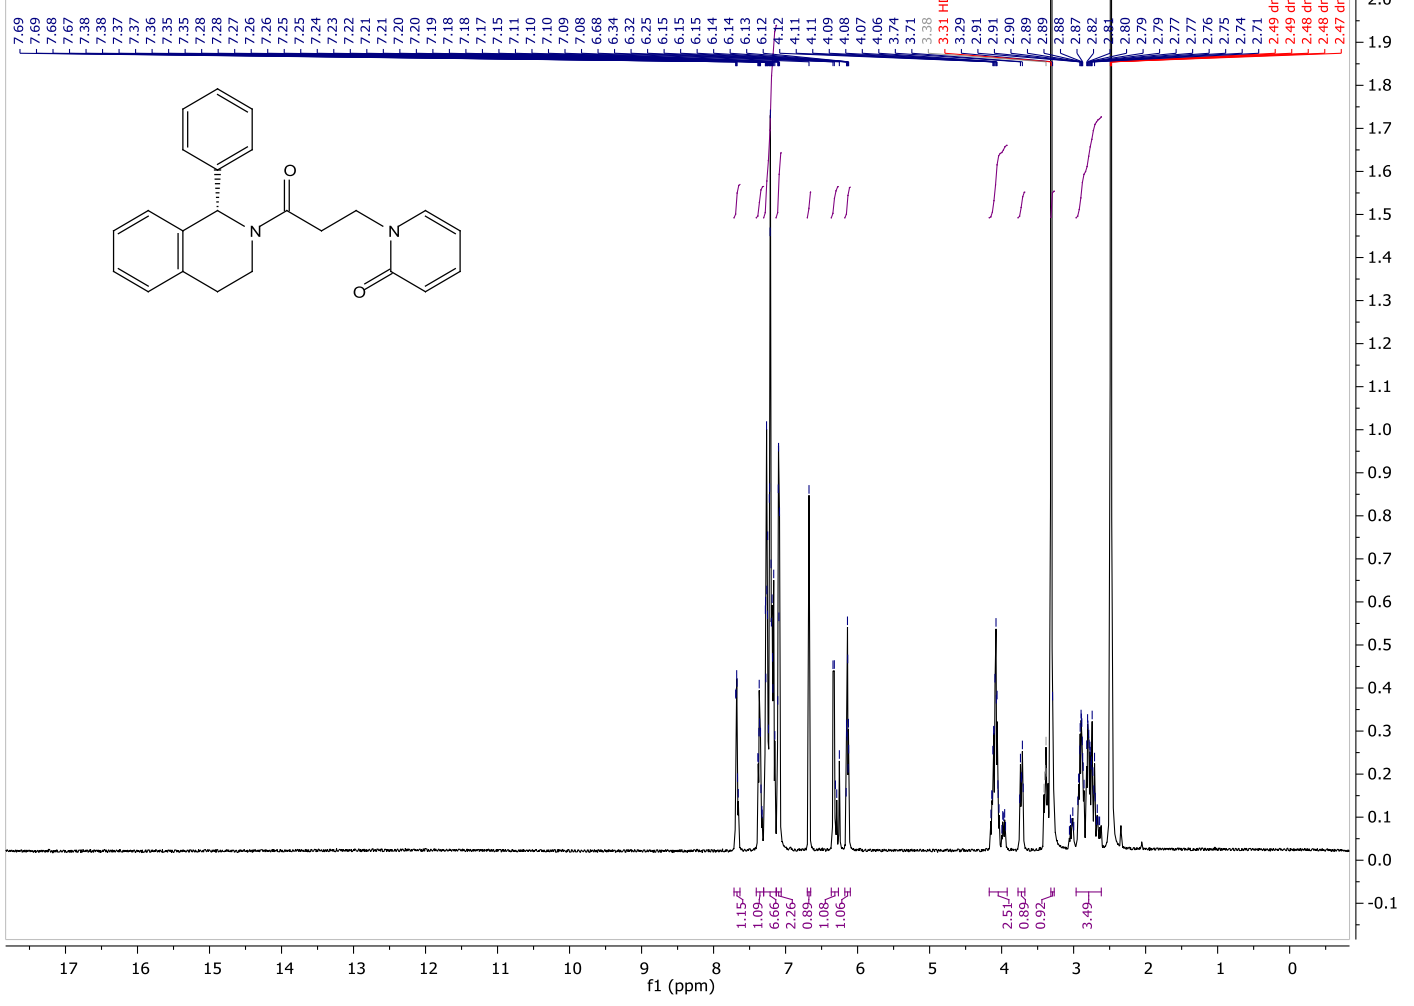

MaxPeak: 98.15%  
Ret\_Time: 1.258 min

Q260286\$3

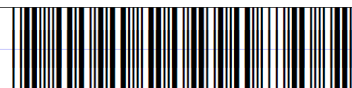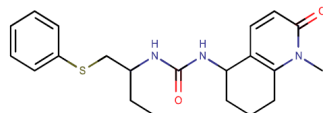

Mol Wt 385.52  
Exact Mass 385.22

| # | Time  | Area% |
|---|-------|-------|
| 1 | 1.258 | 98.15 |
| 2 | 1.325 | 1.85  |

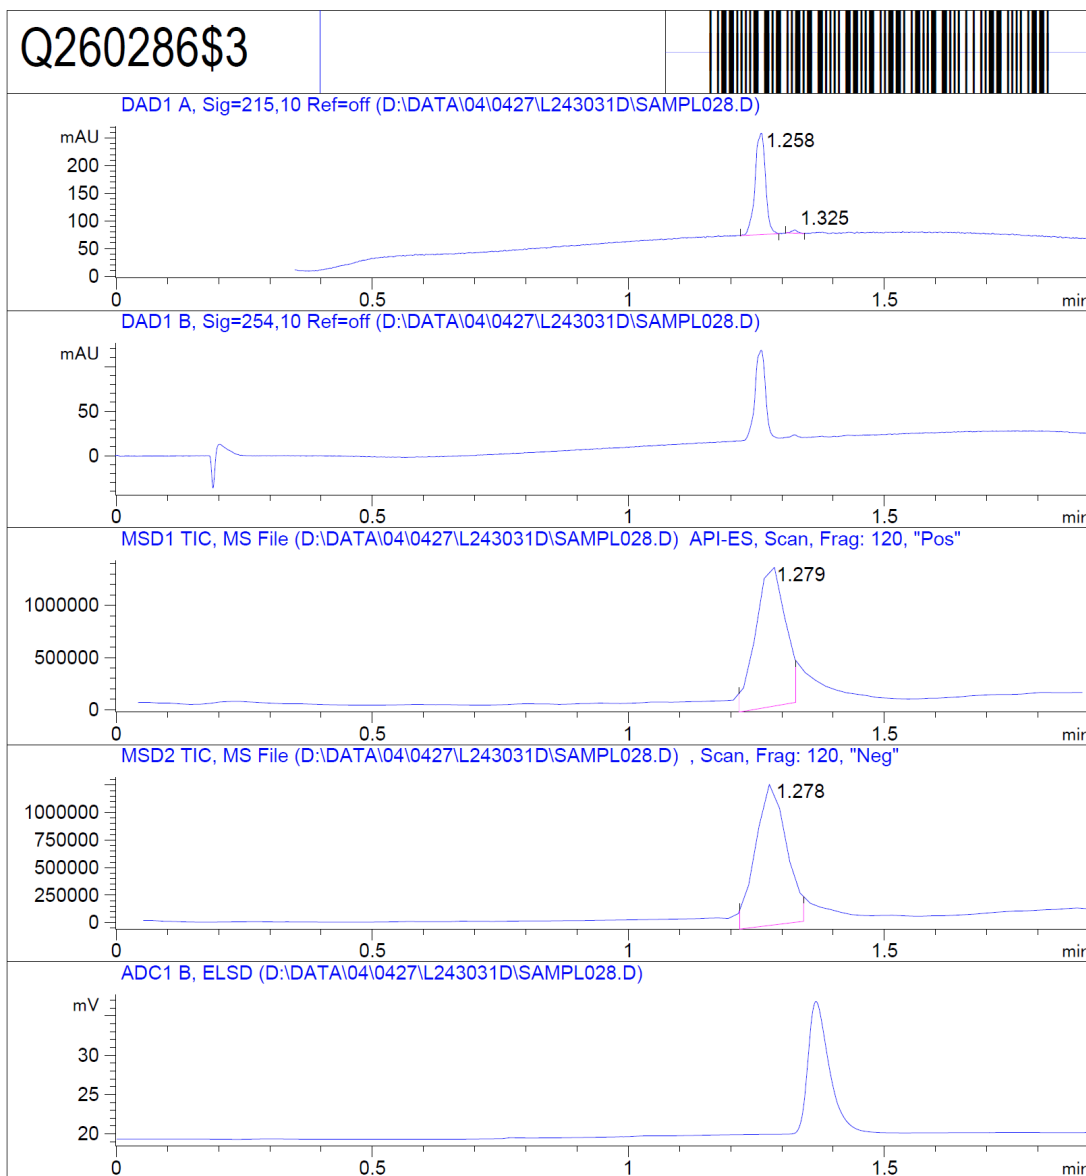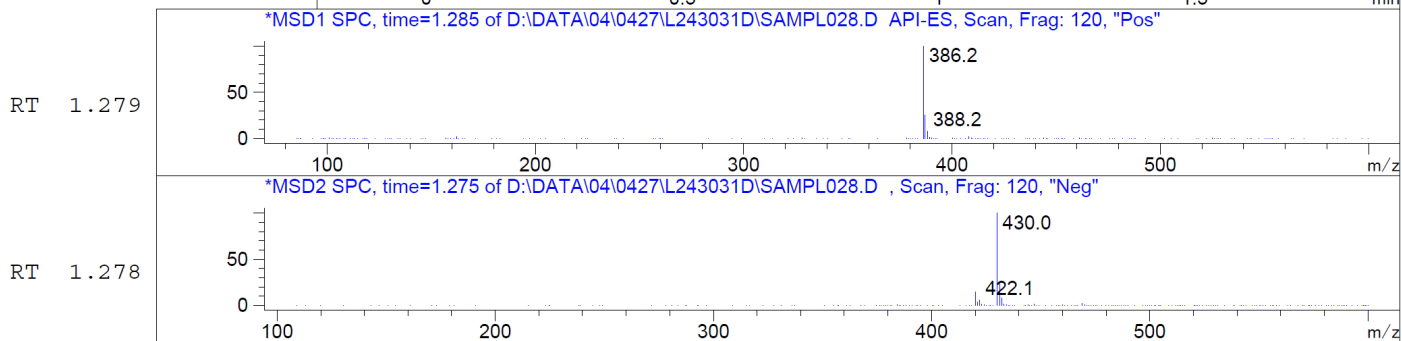

Z2477360481\_(ZINC000650987125)

Z2477360481\_(ZINC000650987125)

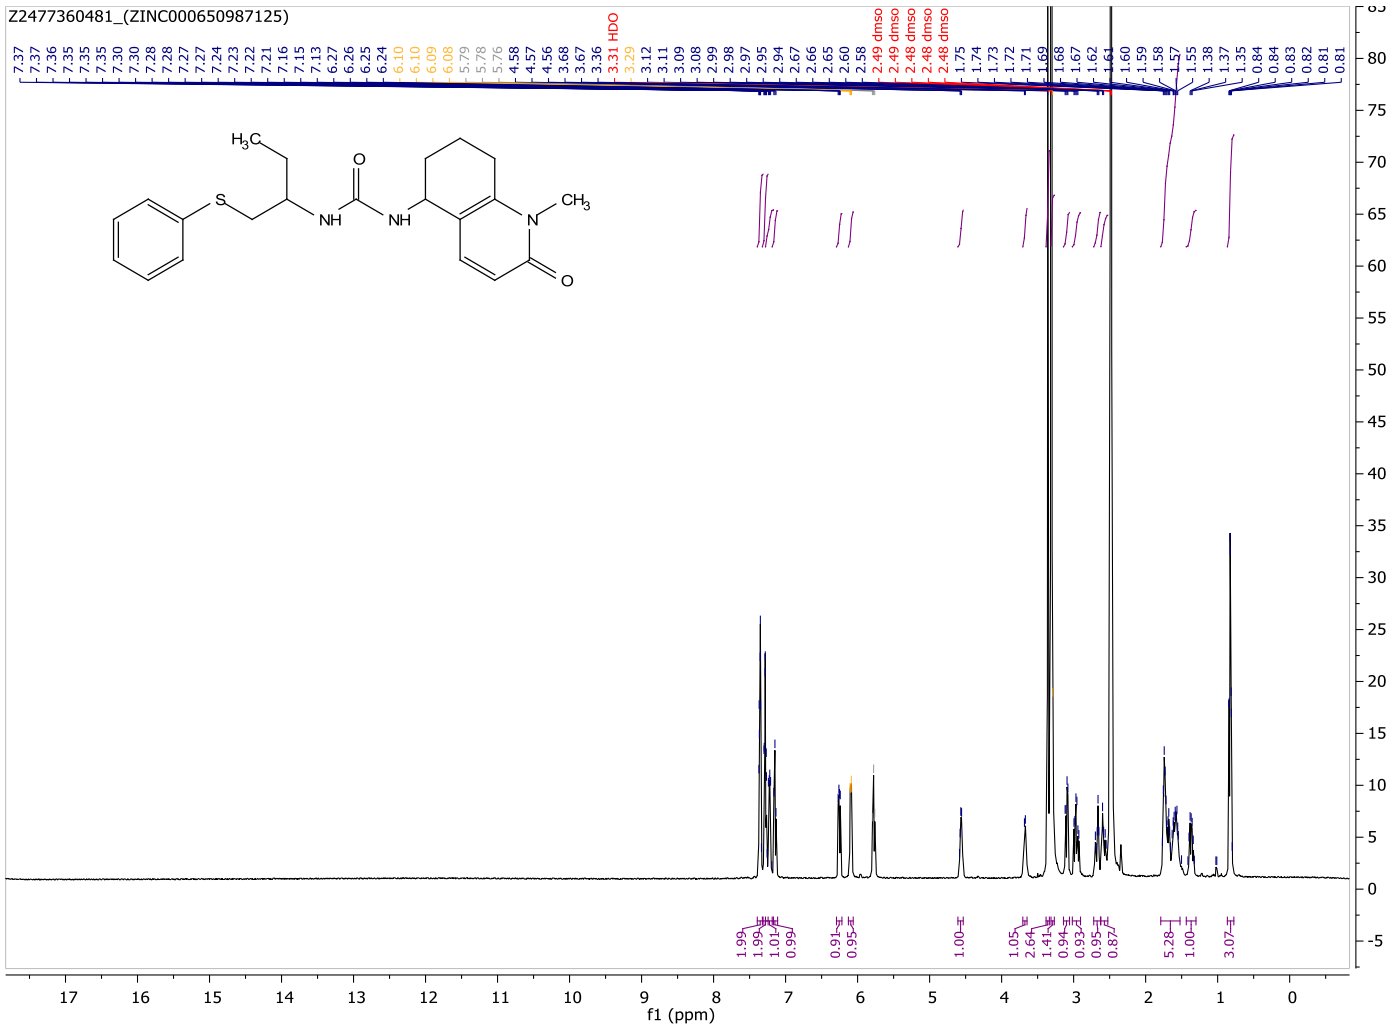



MaxPeak: 100.00%  
Ret\_Time: 1.300 min

Q260214\$114

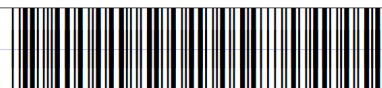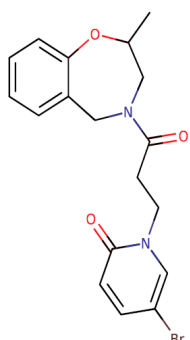

Mol Wt 391.26

Exact Mass 390.08

| # | Time  | Area%  |
|---|-------|--------|
| 1 | 1.300 | 100.00 |

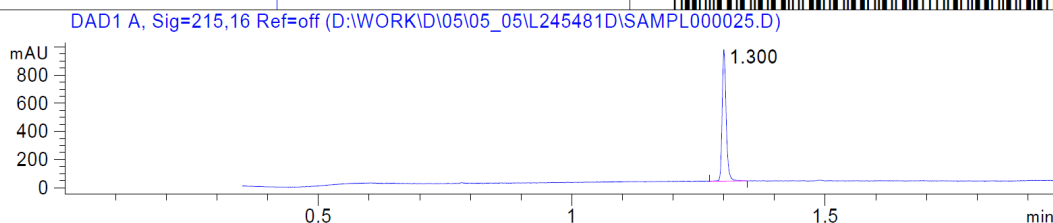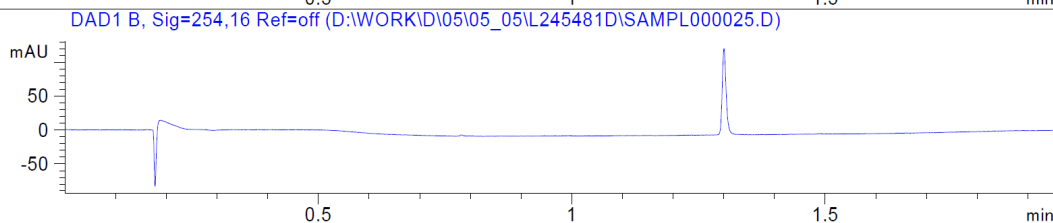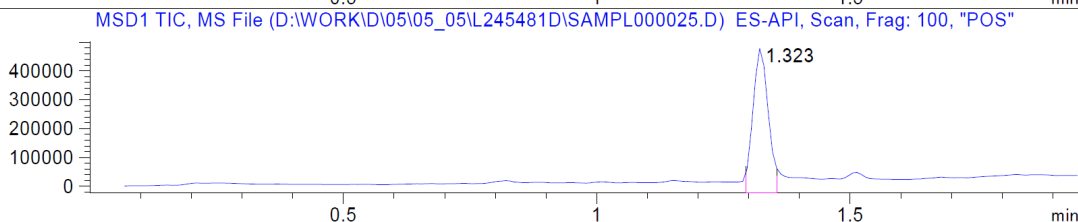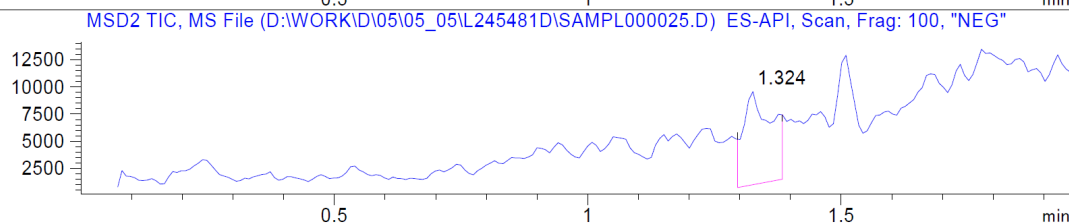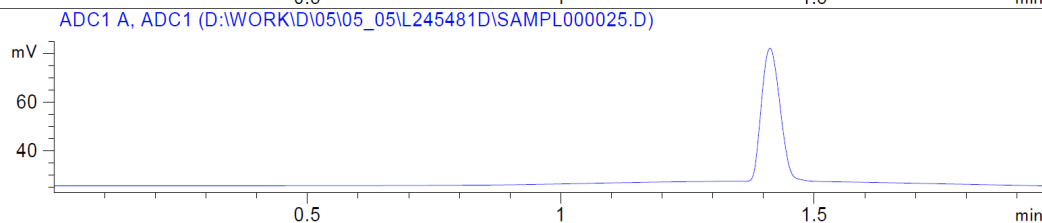

RT 1.323

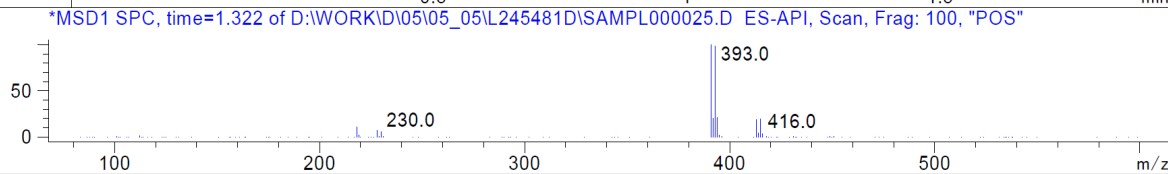

RT 1.324

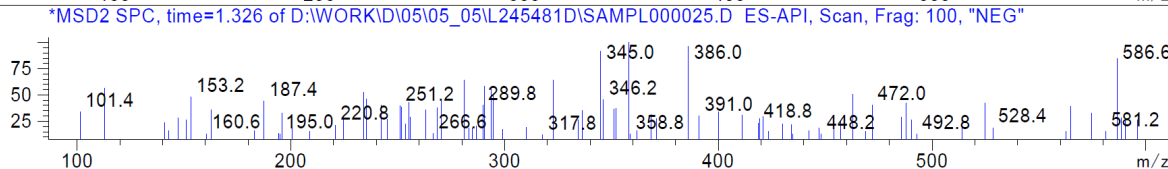

Z2230170963\_(ZINC000553840273)

Z2230170963\_(ZINC000553840273)

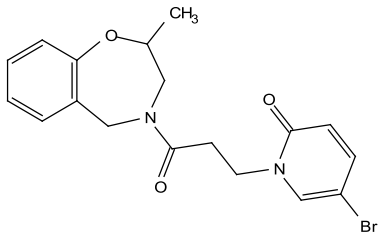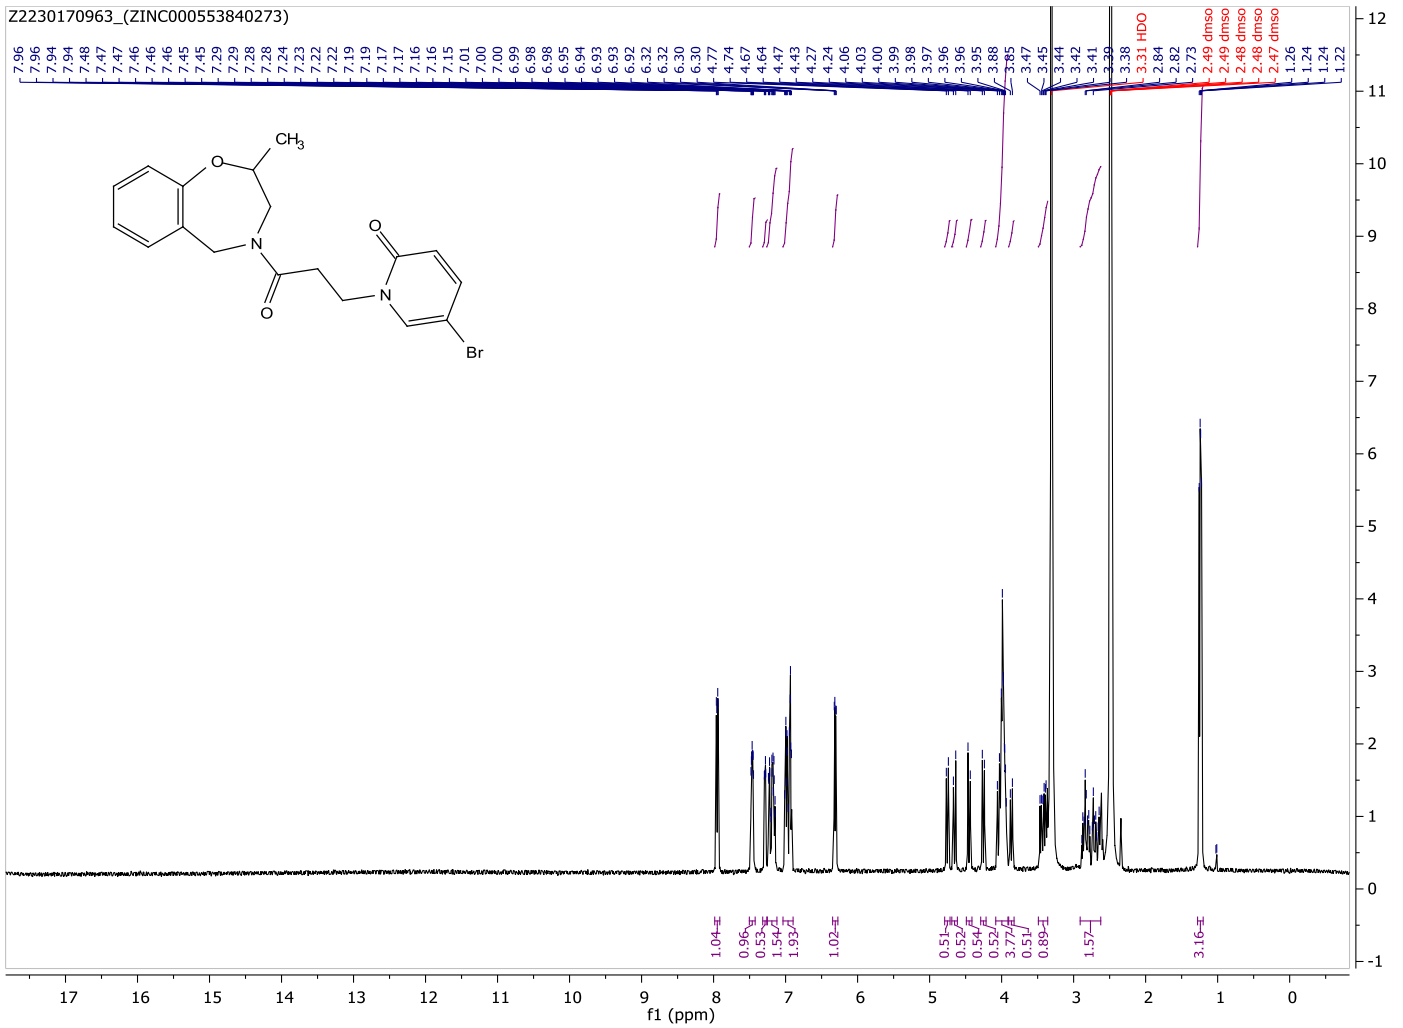

MaxPeak: 100.00%  
Ret\_Time: 1.498 min

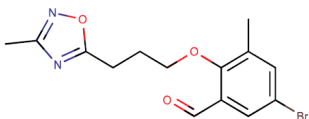

Mol Wt 339.18  
Exact Mass 338.04

| # | Time  | Area%  |
|---|-------|--------|
| 1 | 1.498 | 100.00 |

# Q784757\$G

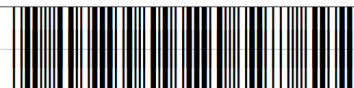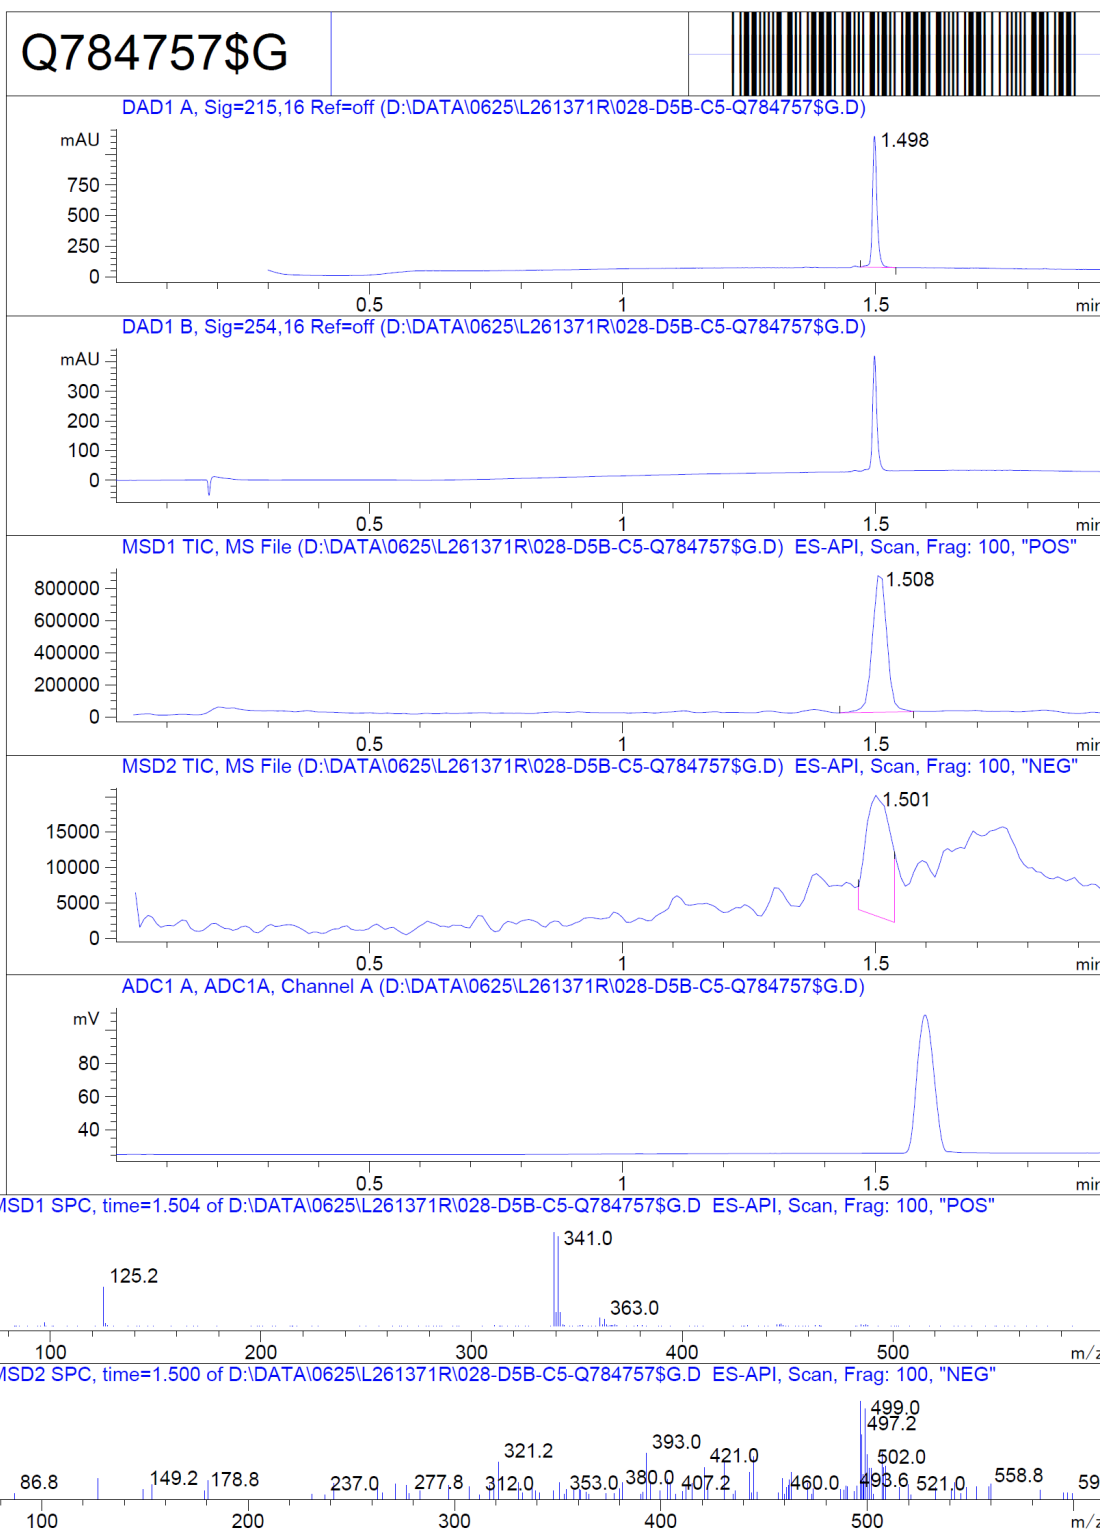

Z2686795662

Z2686795662

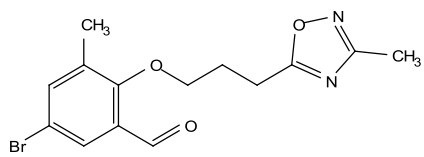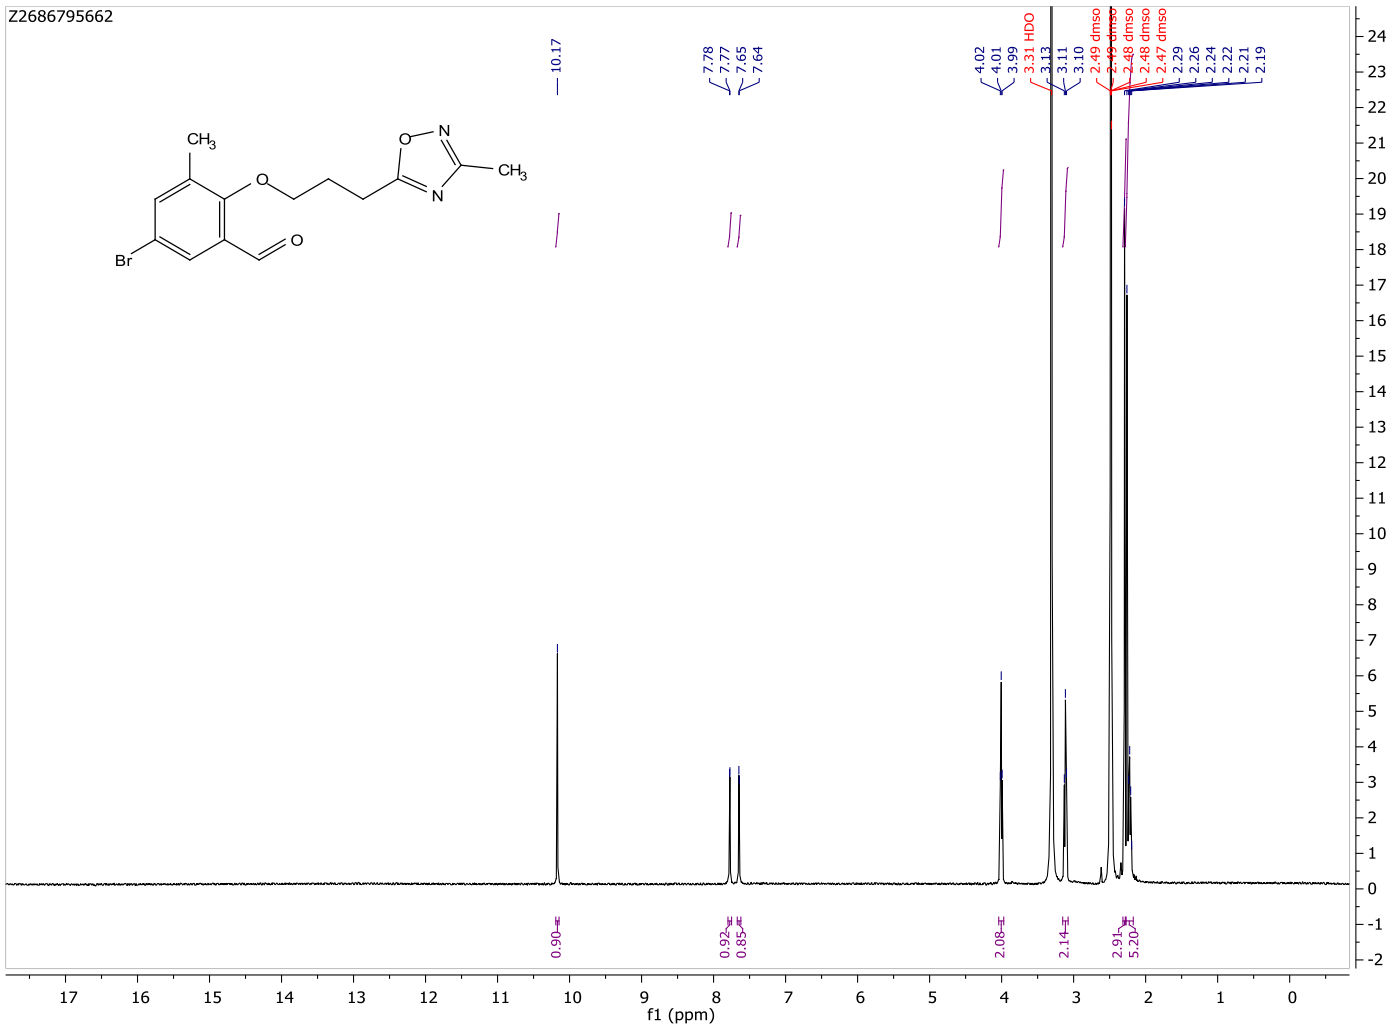

# Q763572\$3

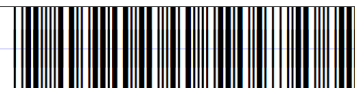

MaxPeak: 100.00%  
Ret\_Time: 1.142 min

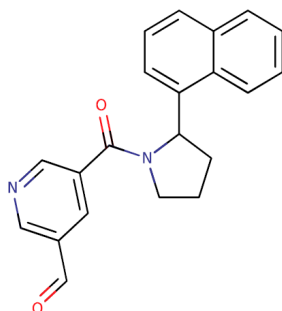

Mol Wt 330.38

Exact Mass 330.16

| # | Time  | Area%  |
|---|-------|--------|
| 1 | 1.142 | 100.00 |

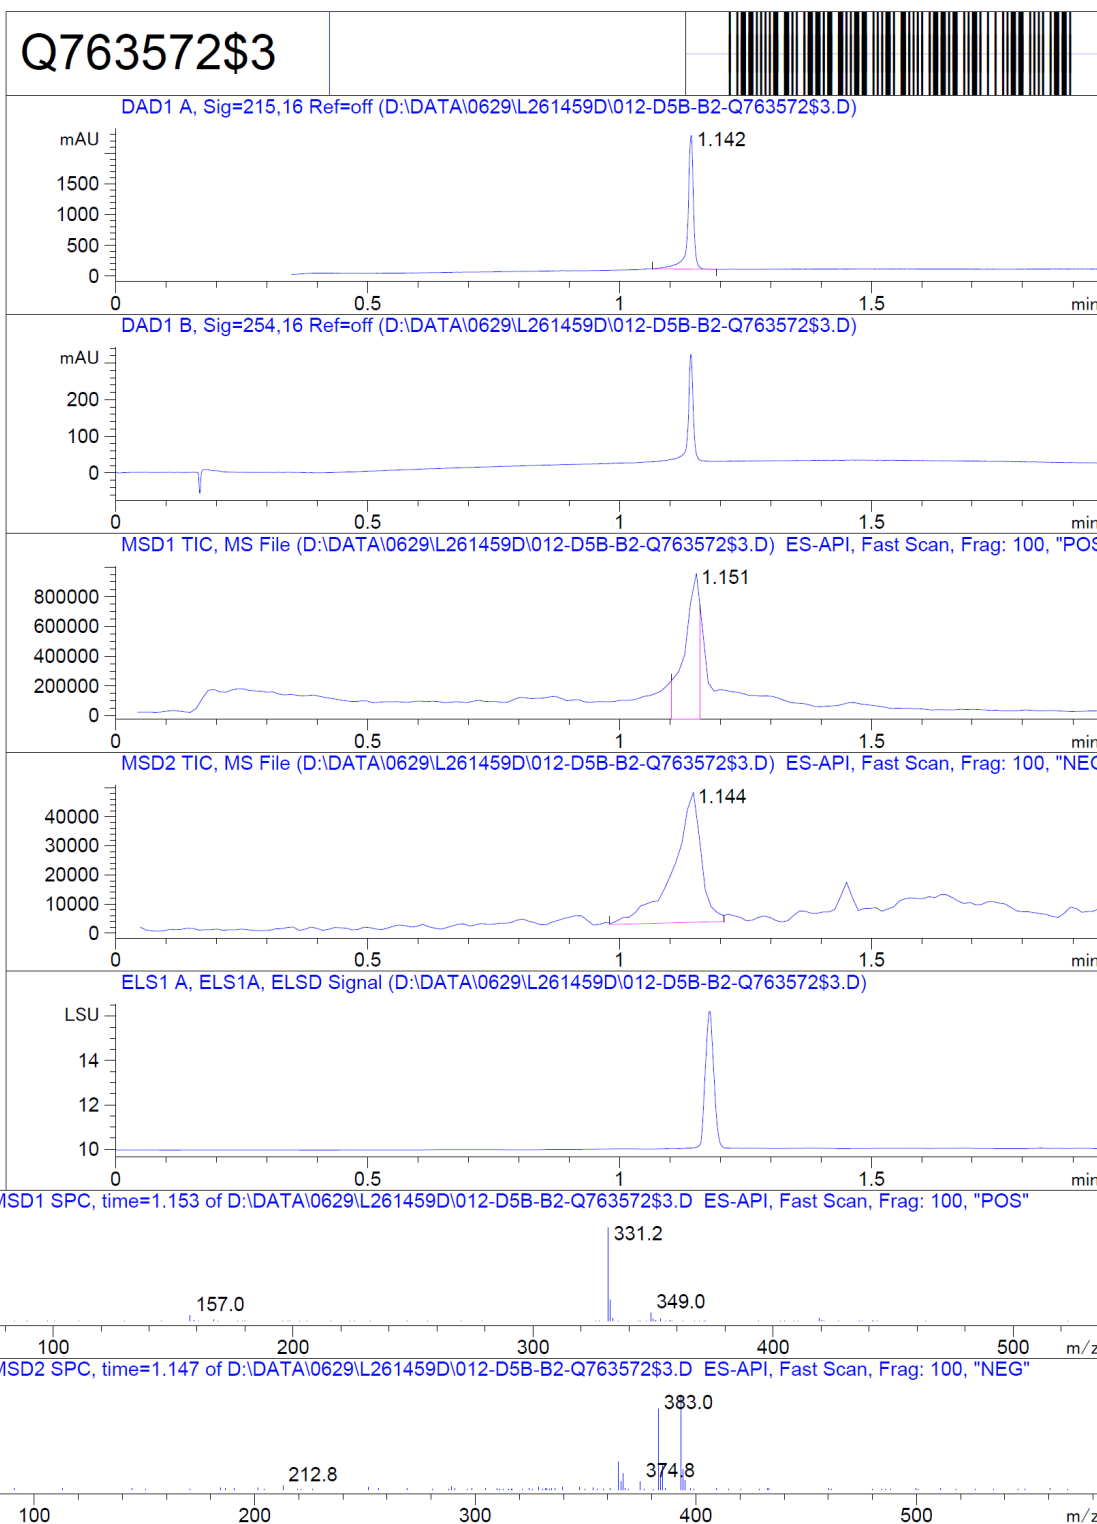

Z4497434908

Z4497434908

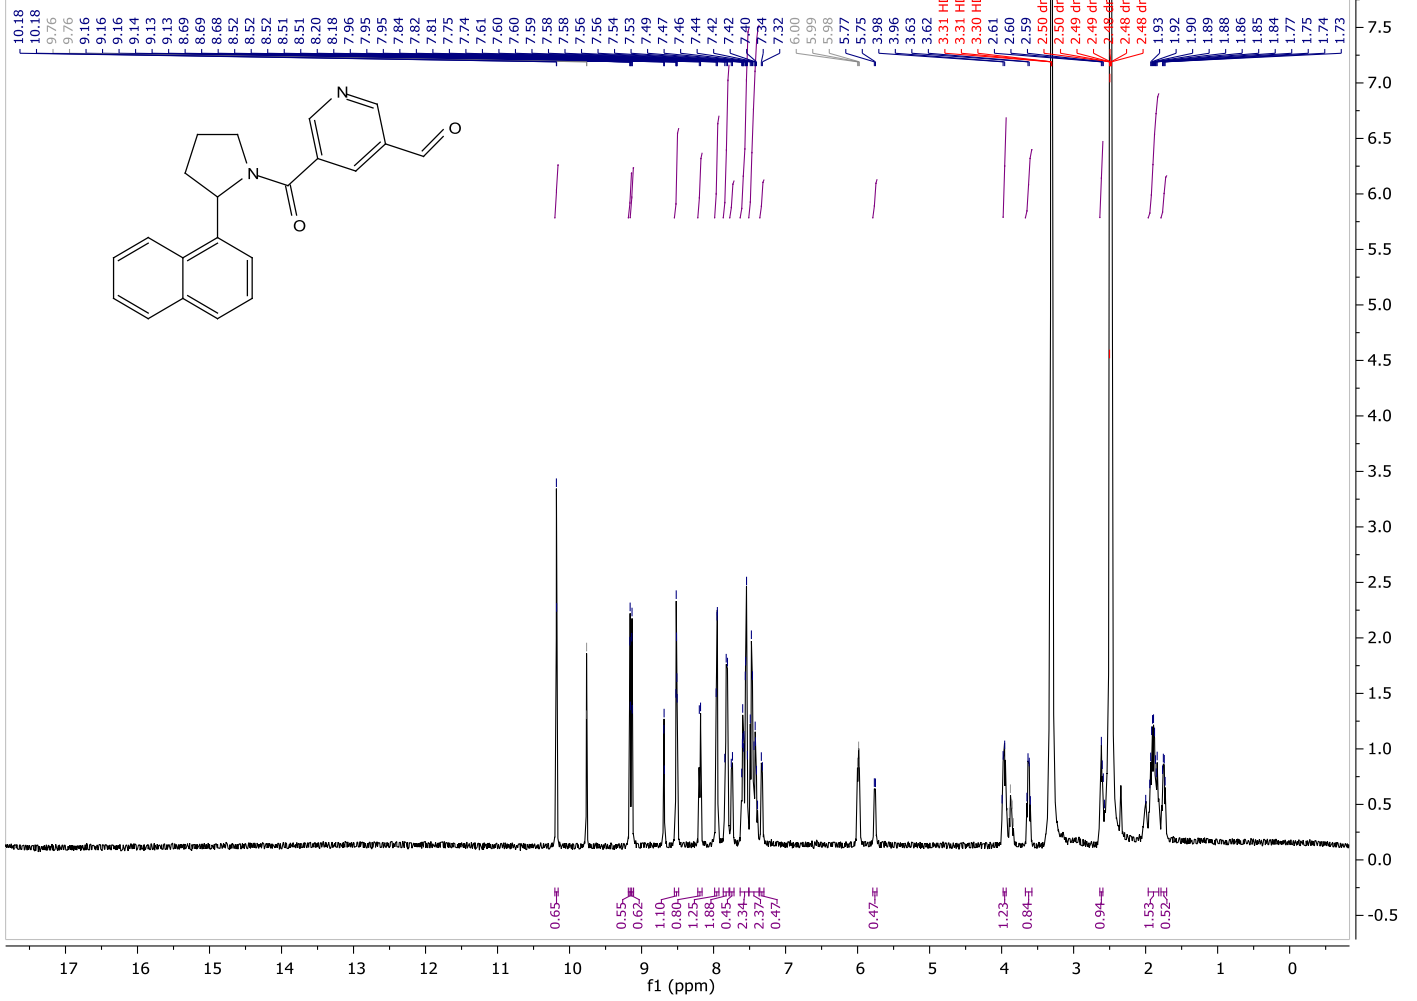

MaxPeak: 100.00%  
Ret\_Time: 1.477 min

# Q763501\$9

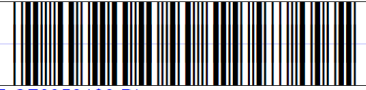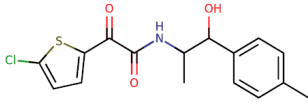

**Mol Wt** 337.82  
**Exact Mass** 337.07

| # | Time  | Area%  |
|---|-------|--------|
| 1 | 1.477 | 100.00 |

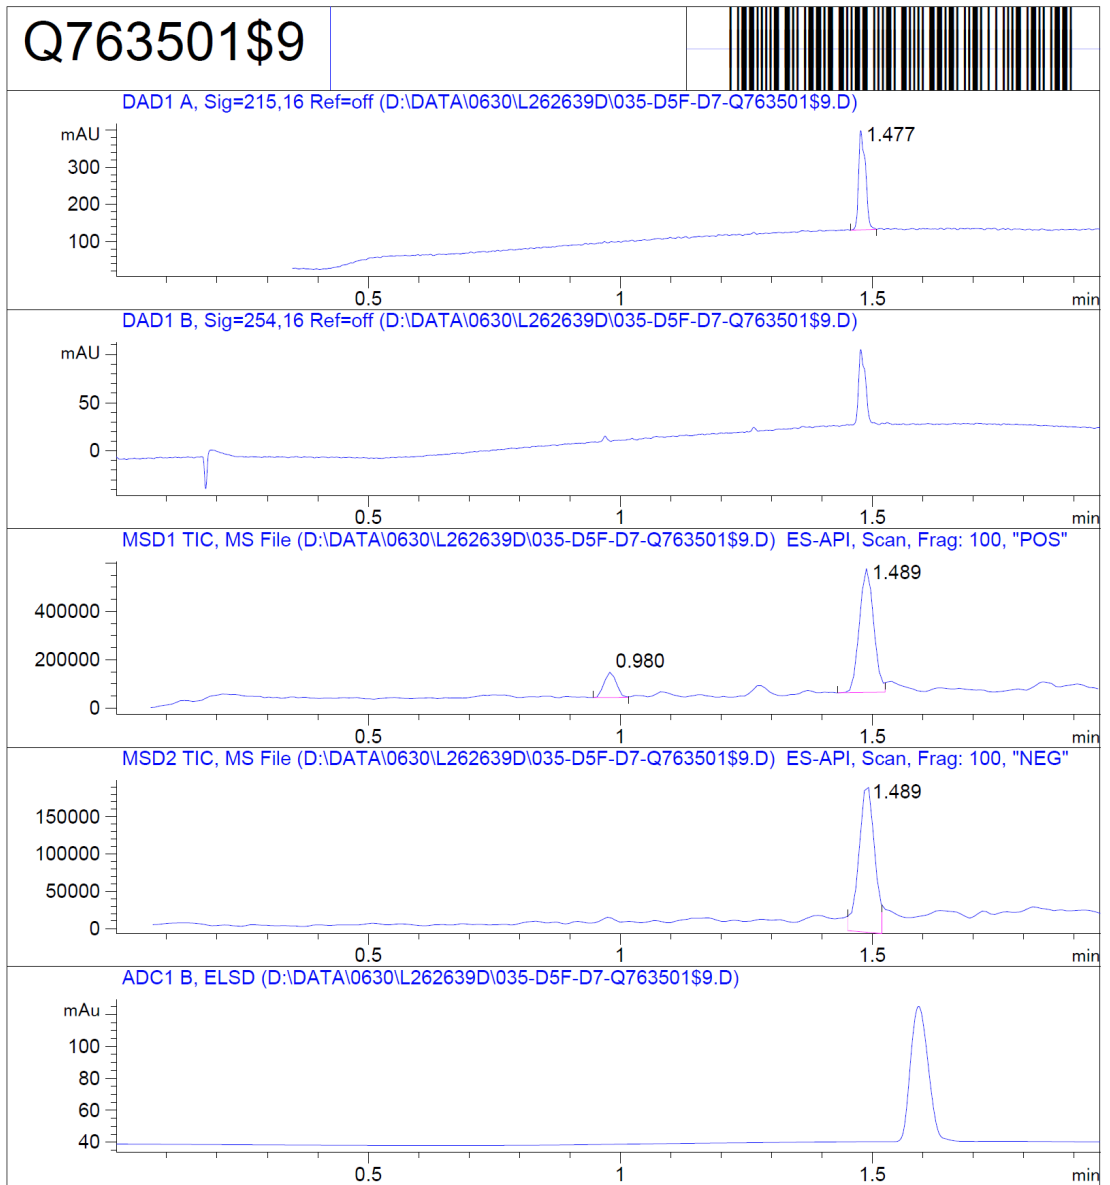

RT 0.980

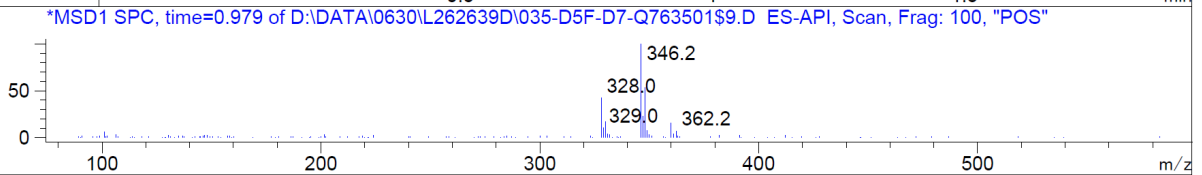

RT 1.489

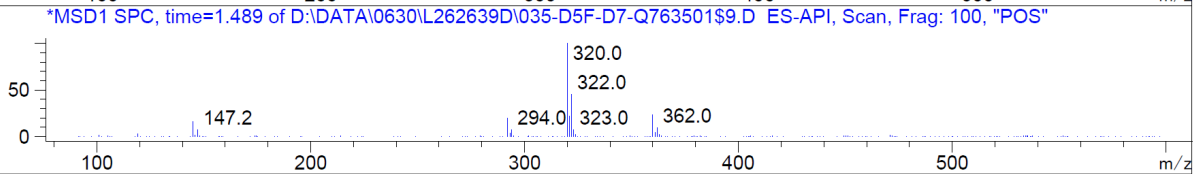

RT 1.489

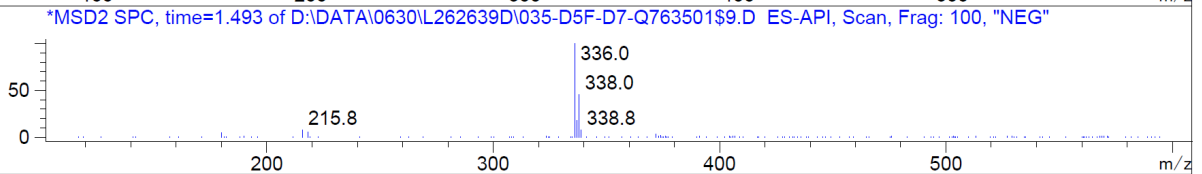

Z2091248890

Z2091248890

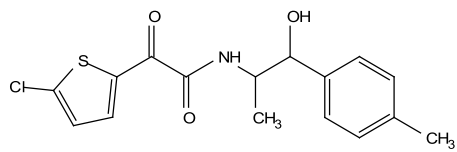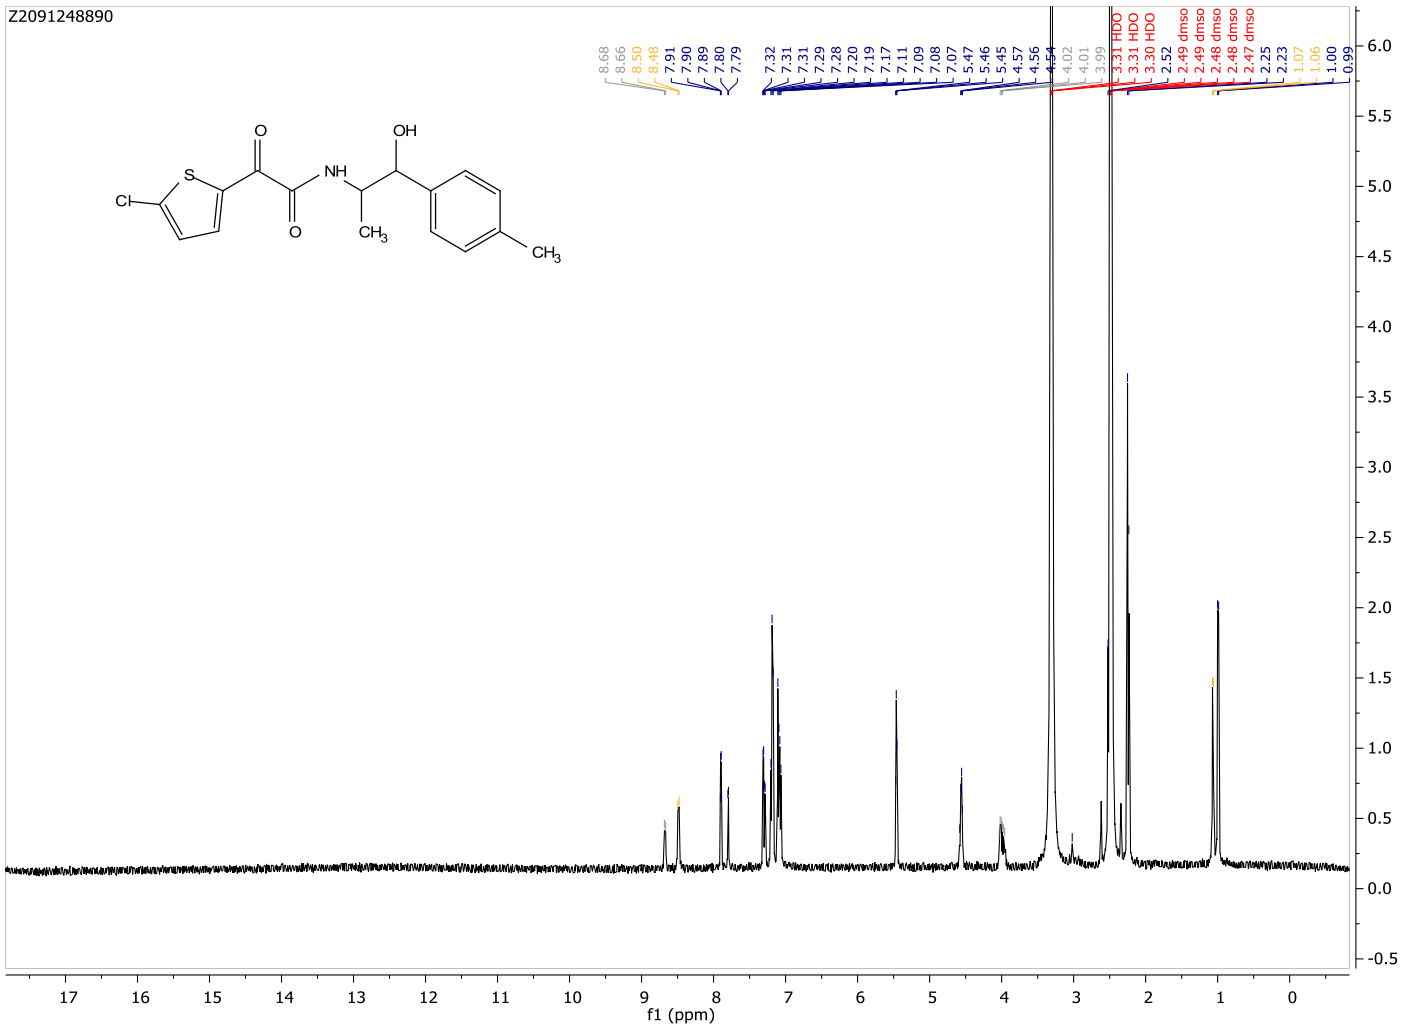



MaxPeak: 100.00%  
Ret\_Time: 1.053 min

# Q797696\$1

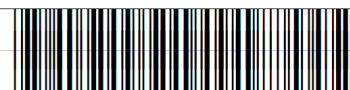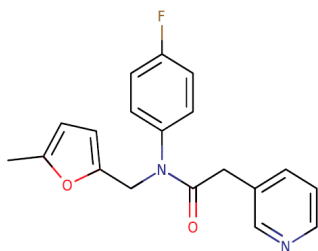

**Mol Wt** 324.35  
**Exact Mass** 324.15

| # | Time  | Area%  |
|---|-------|--------|
| 1 | 1.053 | 100.00 |

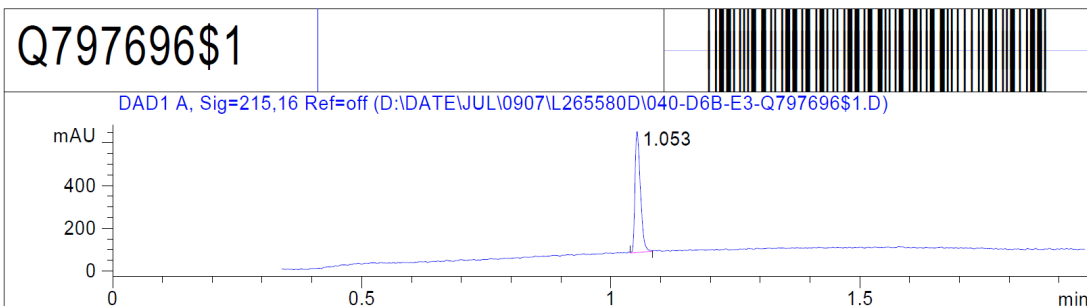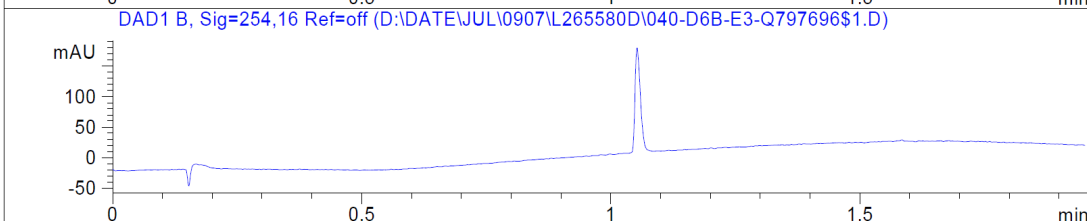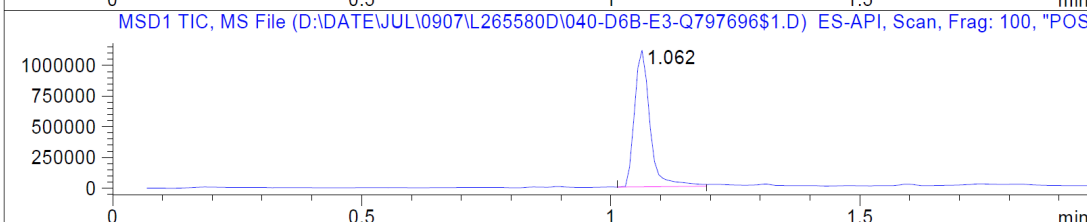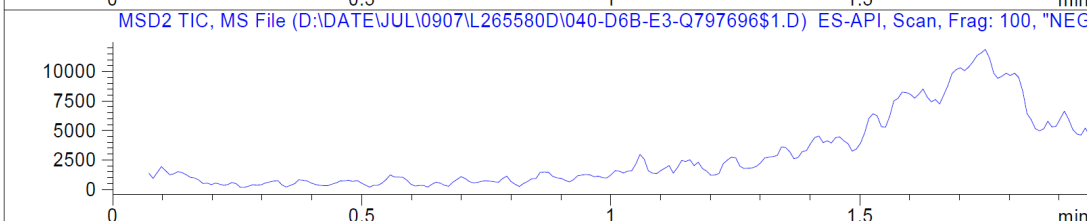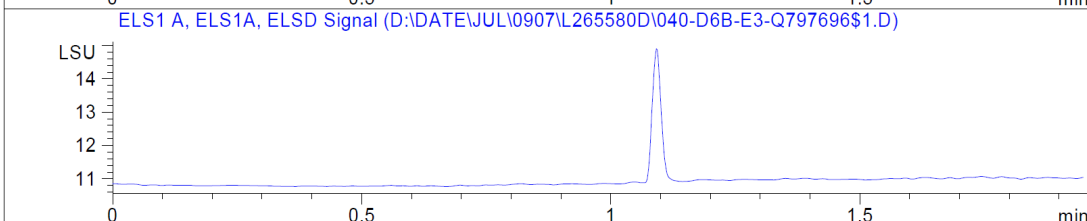

RT 1.062

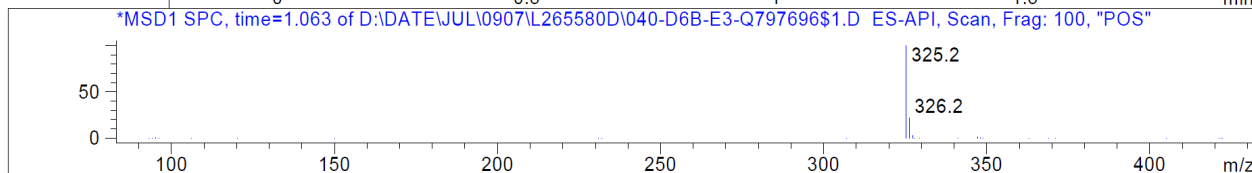

Z1173082912

Z1173082912

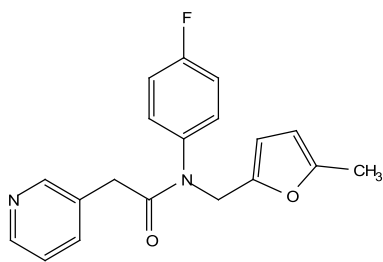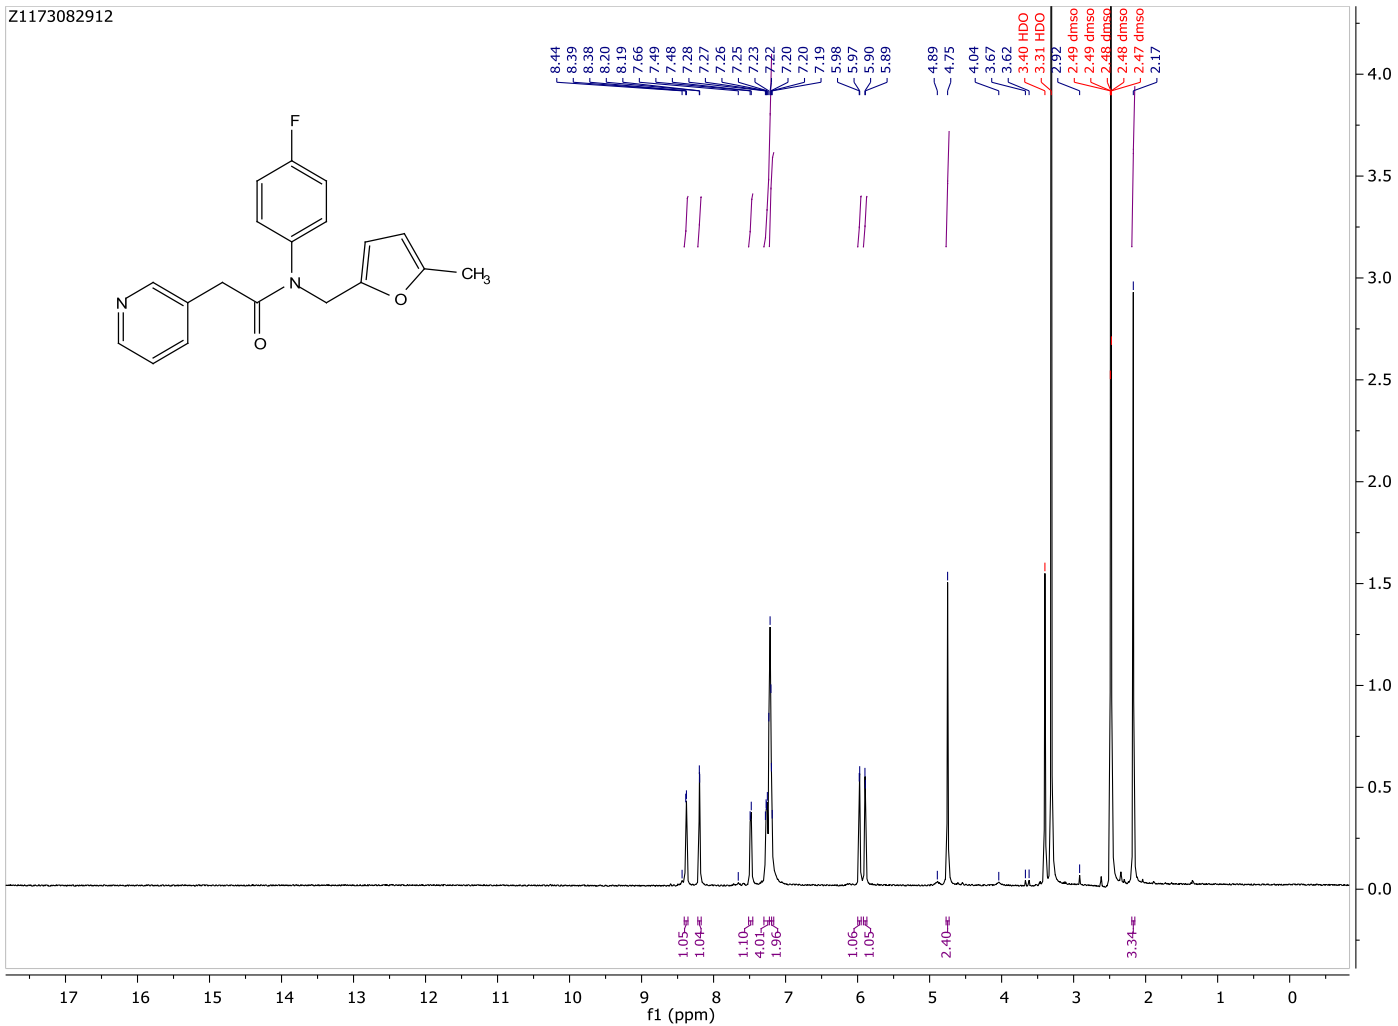

MaxPeak: 100.00%  
Ret\_Time: 1.436 min

Q797821\$2

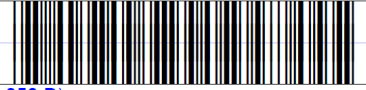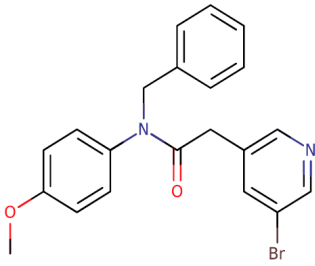

Mol Wt 411.29  
Exact Mass 412.09

| # | Time  | Area%  |
|---|-------|--------|
| 1 | 1.436 | 100.00 |

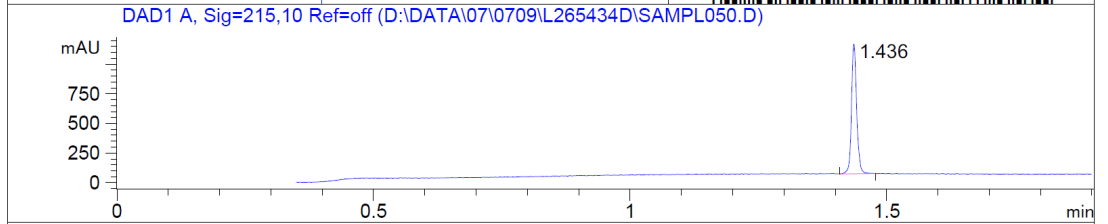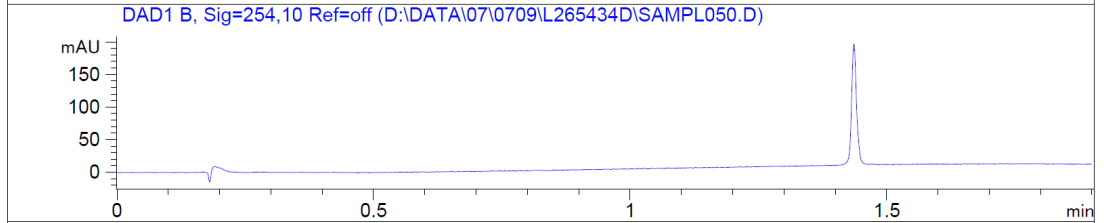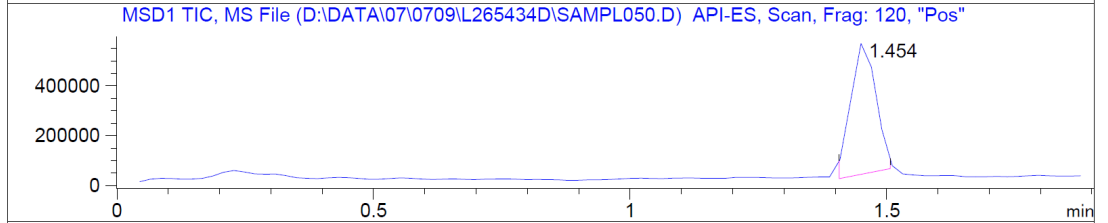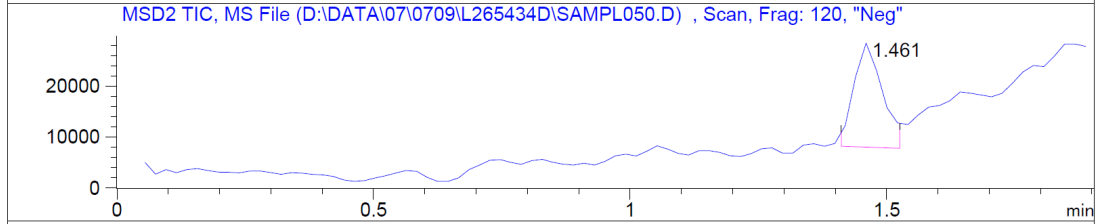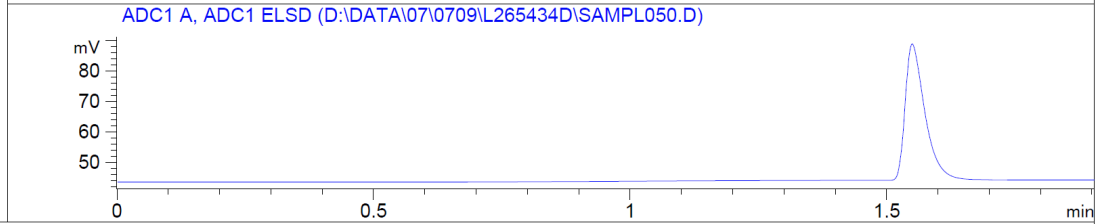

RT 1.454

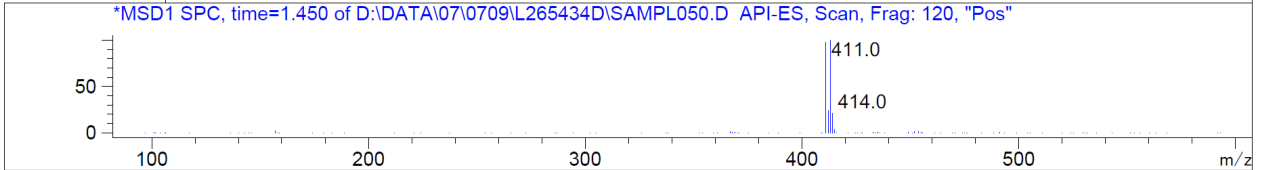

RT 1.461

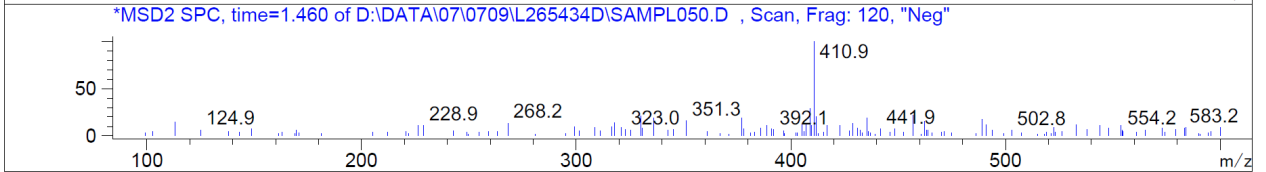

Z4521849273

Z4521849273

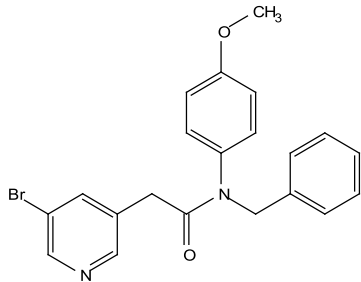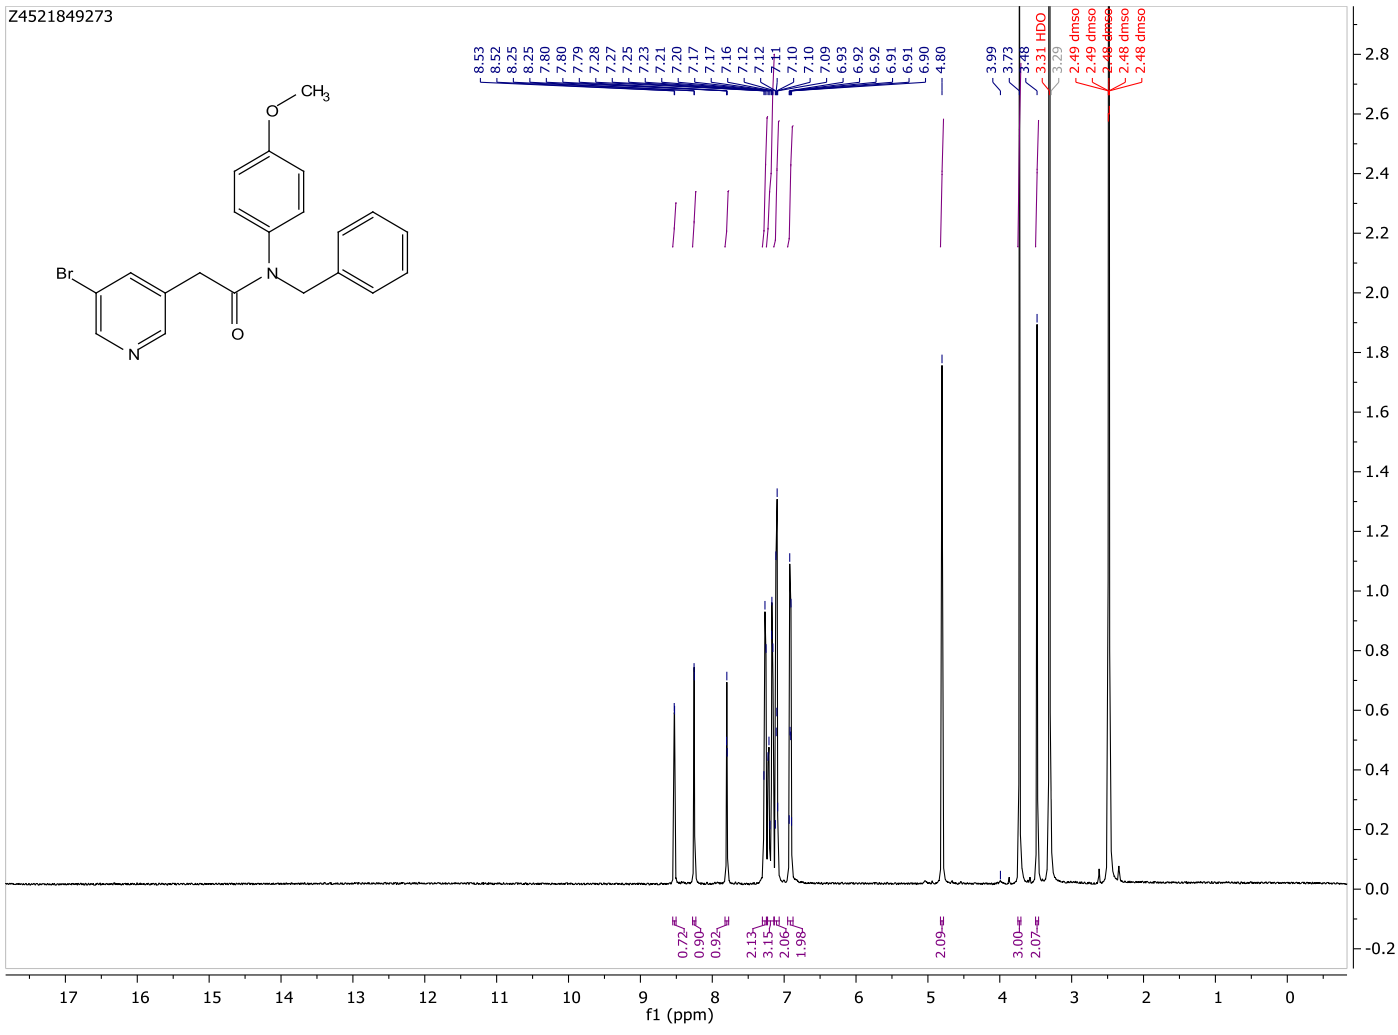

MaxPeak: 100.00%  
Ret\_Time: 1.177 min

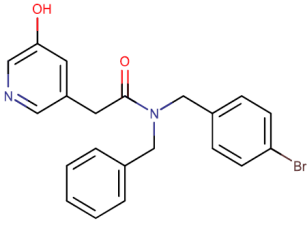

Mol Wt 411.29  
Exact Mass 412.09

| # | Time  | Area%  |
|---|-------|--------|
| 1 | 1.177 | 100.00 |

Q797685\$1

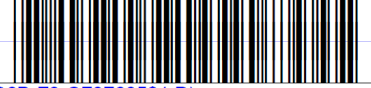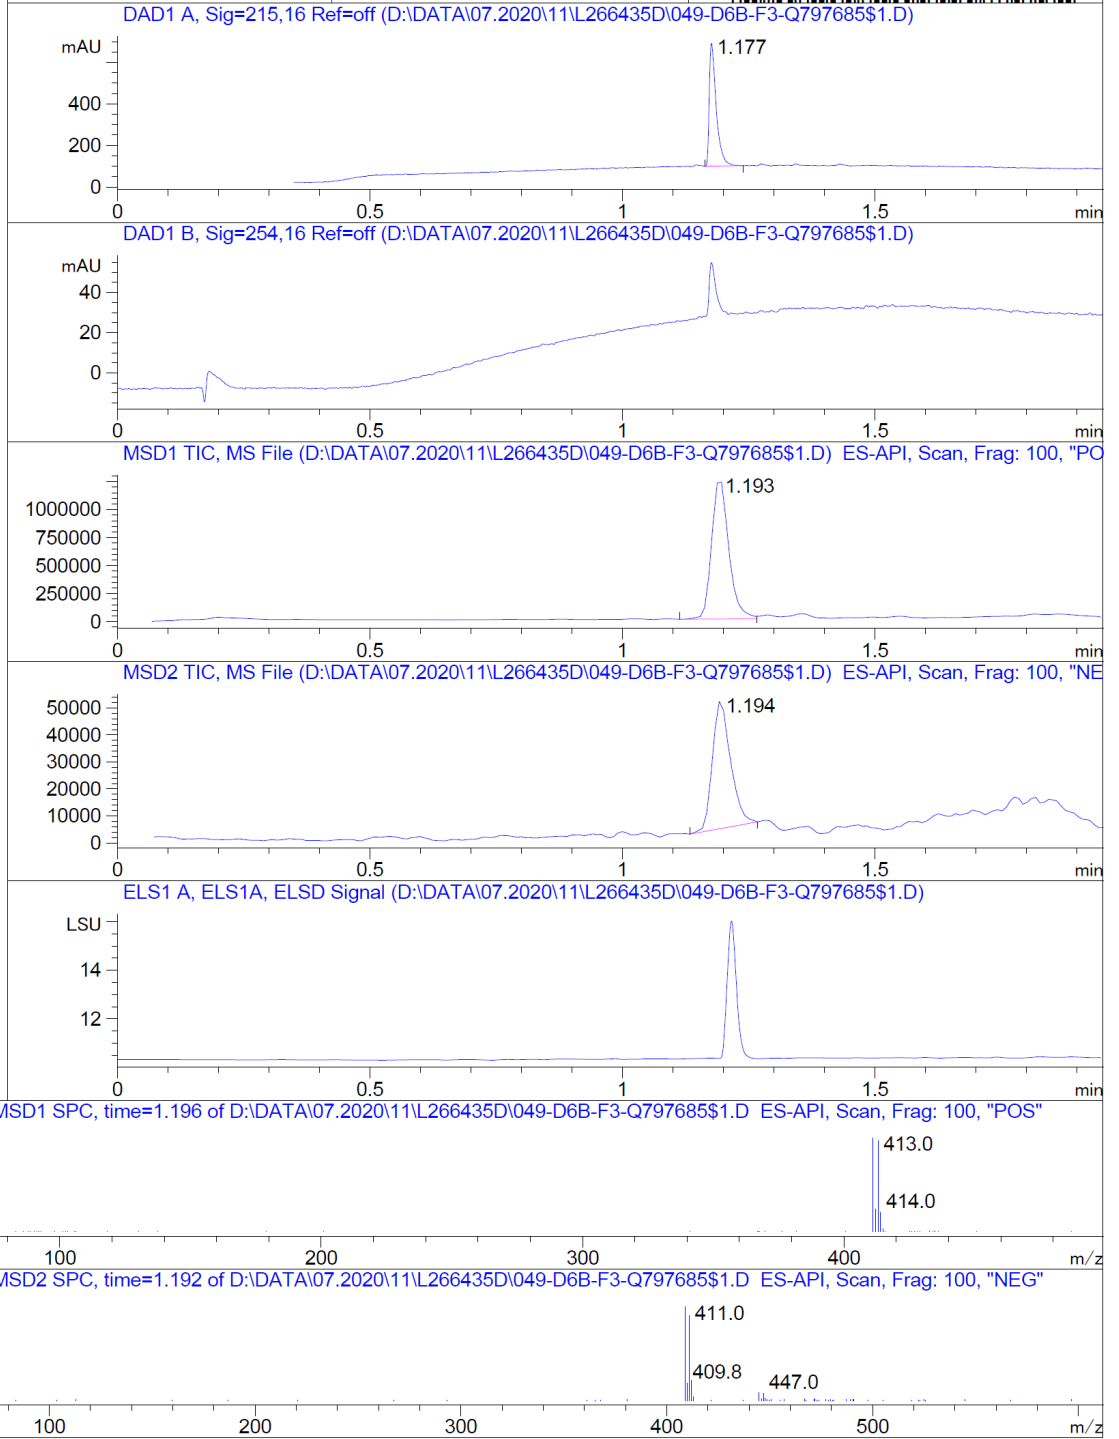

Z4521849300

Z4521849300

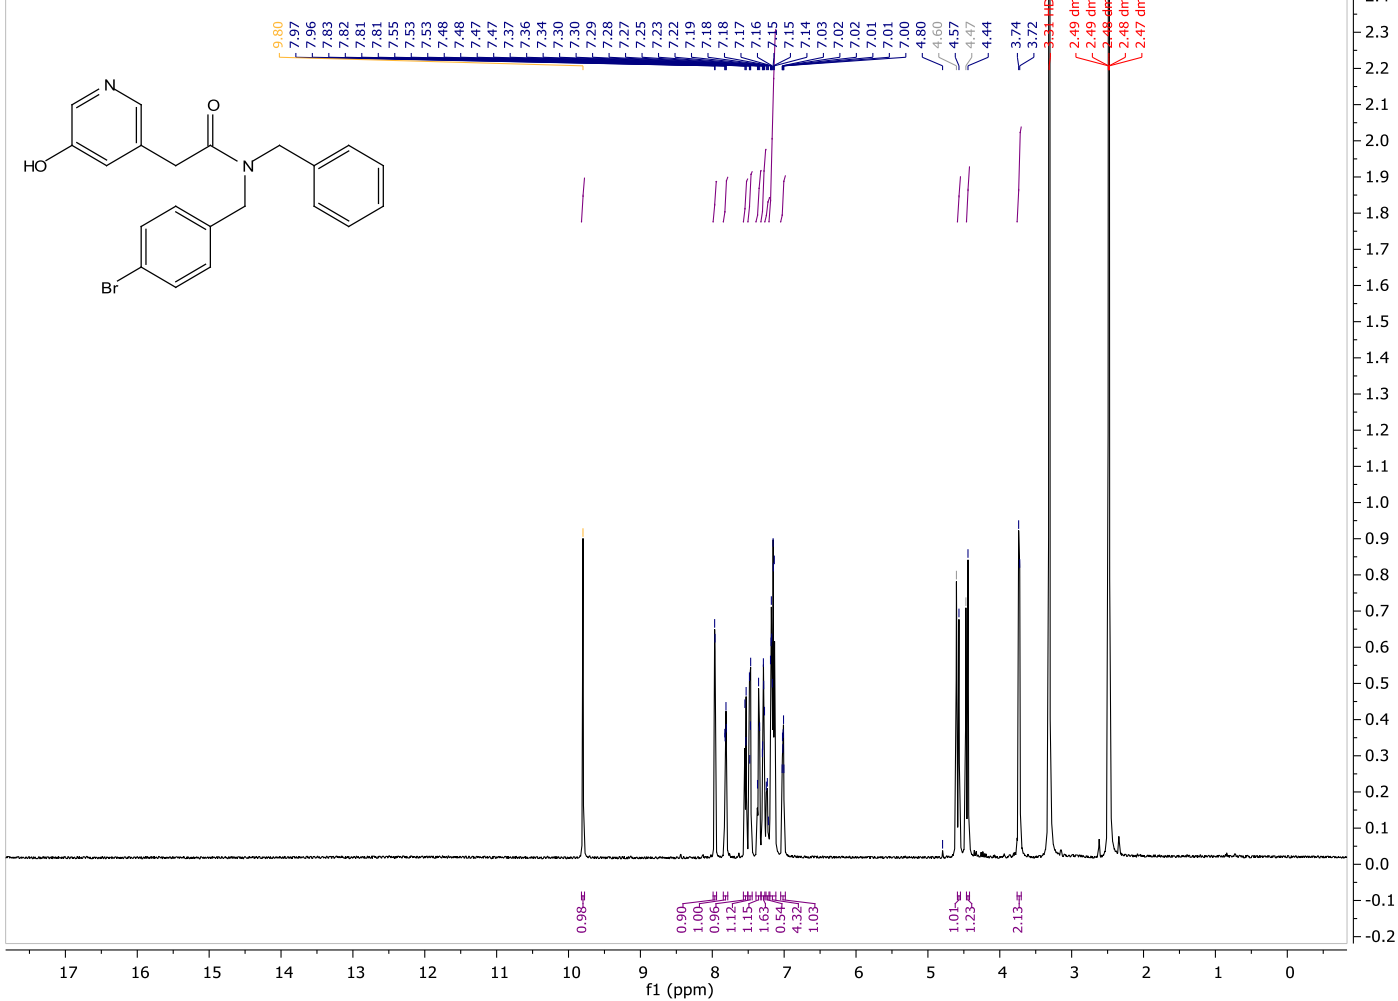

MaxPeak: 100.00%  
Ret\_Time: 2.429 min

# S193170\$1

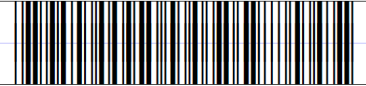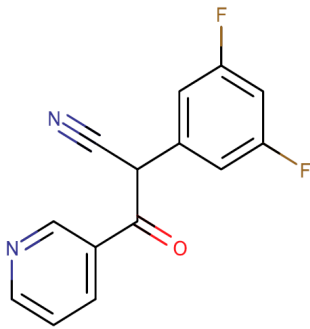

Mol Wt 258.22  
Exact Mass 258.07

| # | Time  | Area%  |
|---|-------|--------|
| 1 | 2.429 | 100.00 |

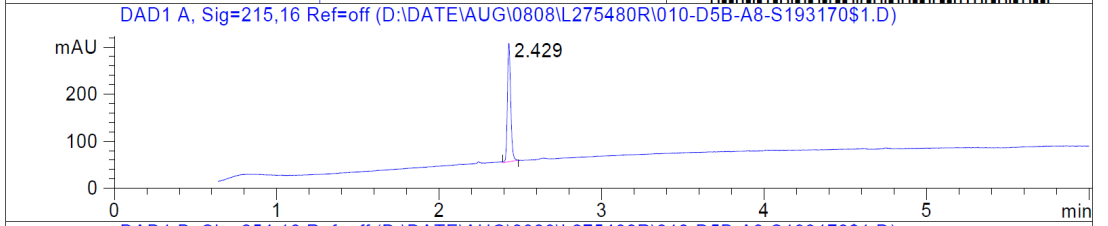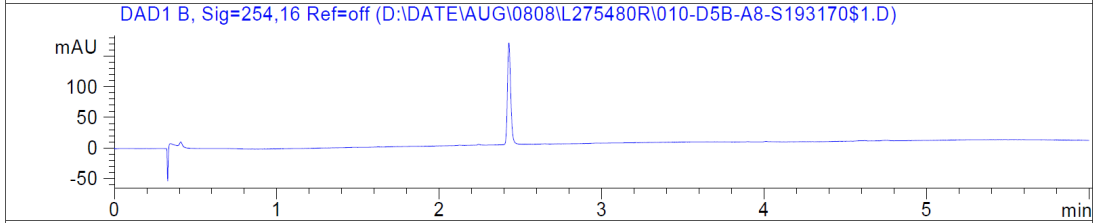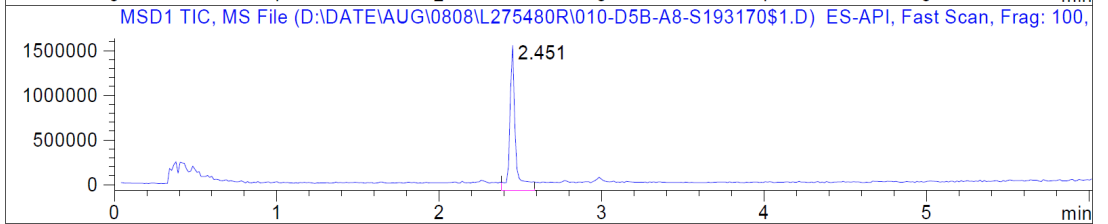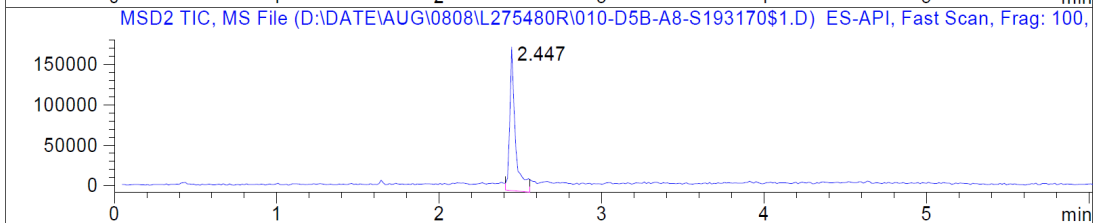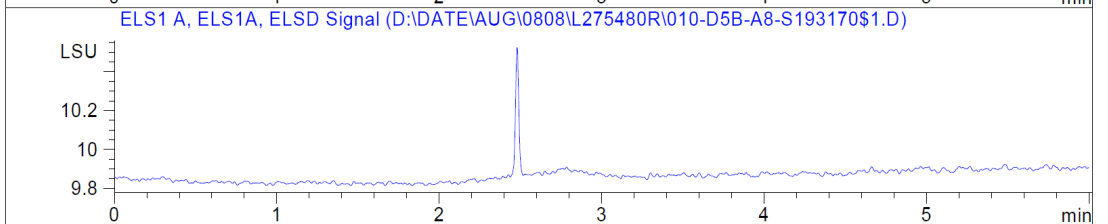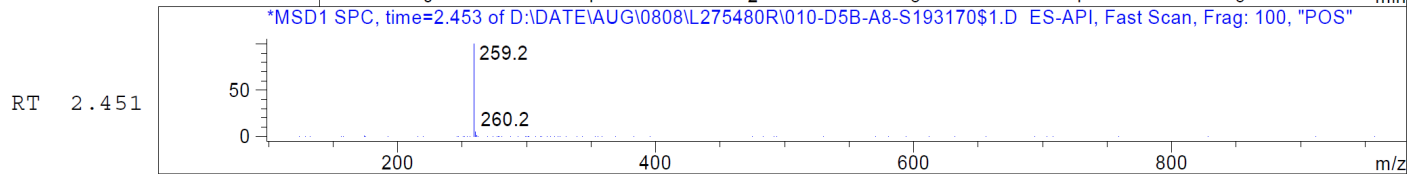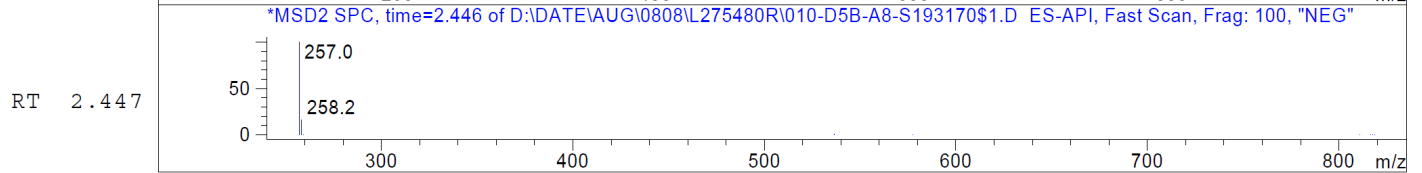

Z821056998

Z821056998

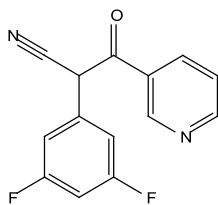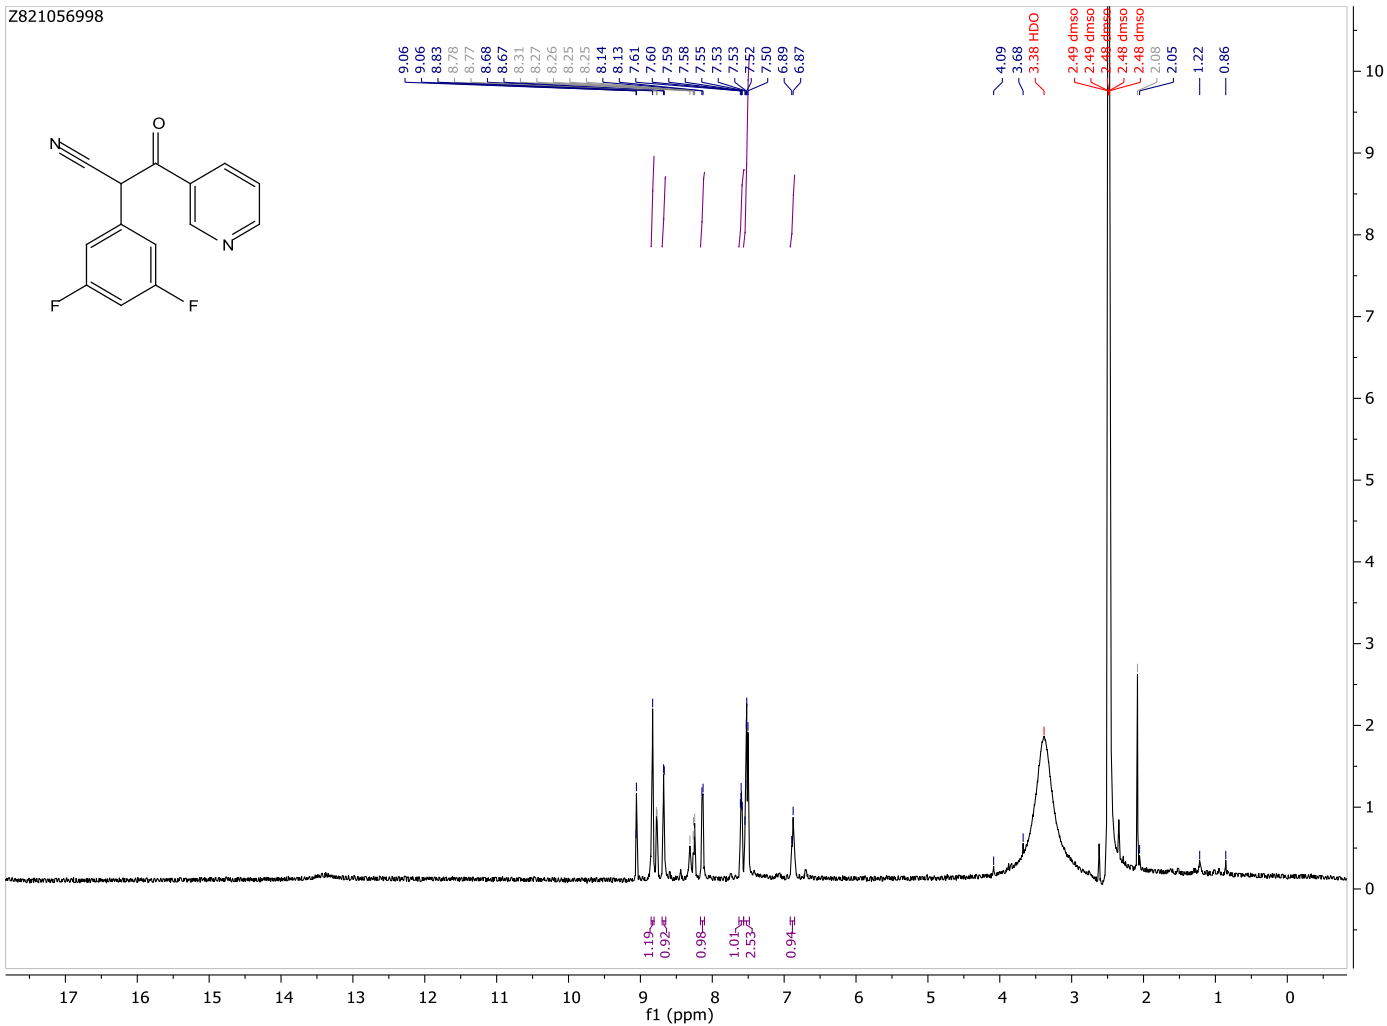



MaxPeak: 100.00%  
Ret\_Time: 1.081 min

# S081650\$1

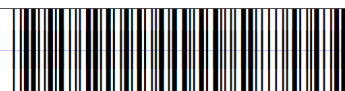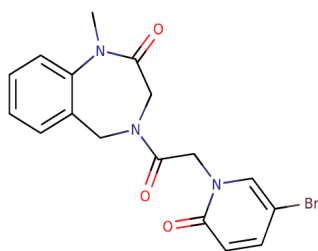

**Mol Wt** 390.23  
**Exact Mass** 389.05

| # | Time  | Area%  |
|---|-------|--------|
| 1 | 1.081 | 100.00 |

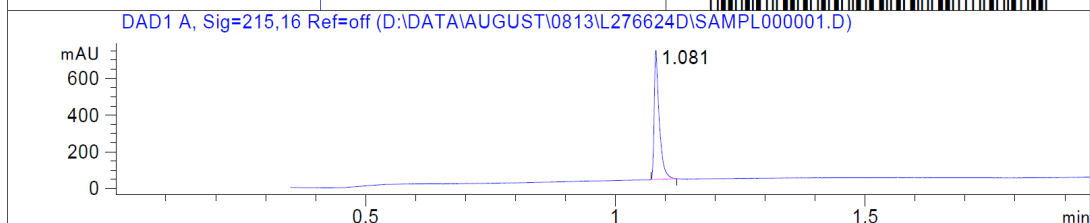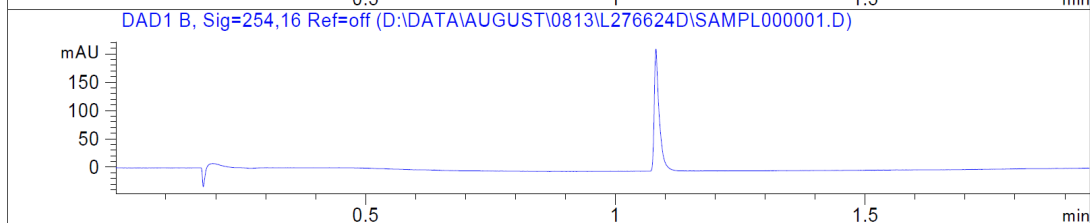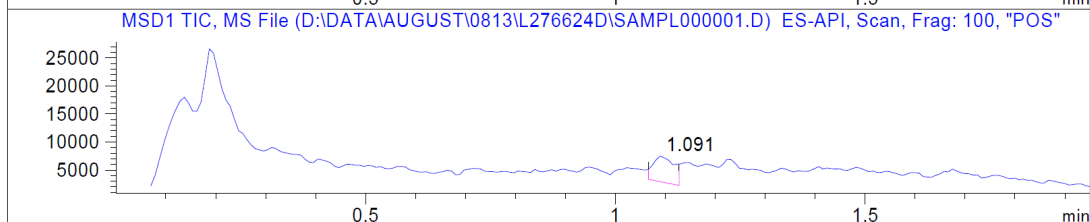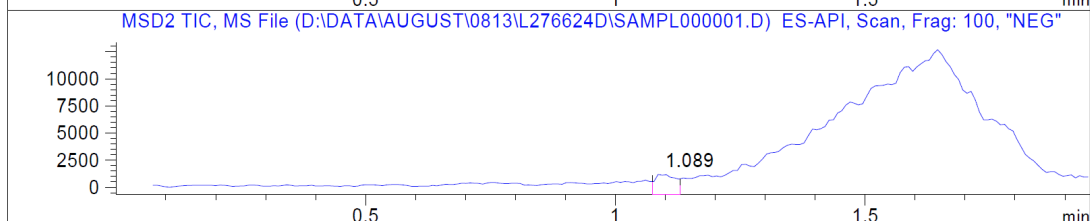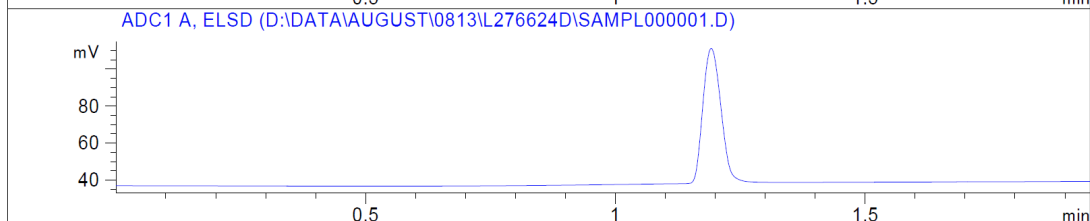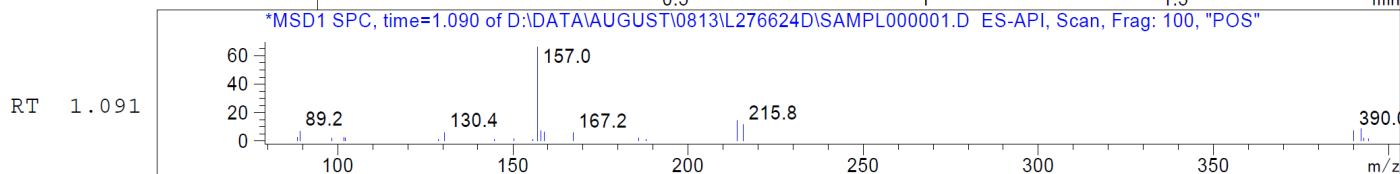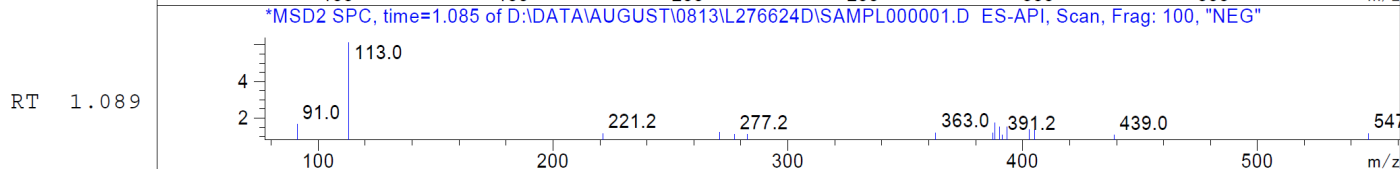

Z4594384266\_(0273num9044)

Z4594384266\_(0273num9044)

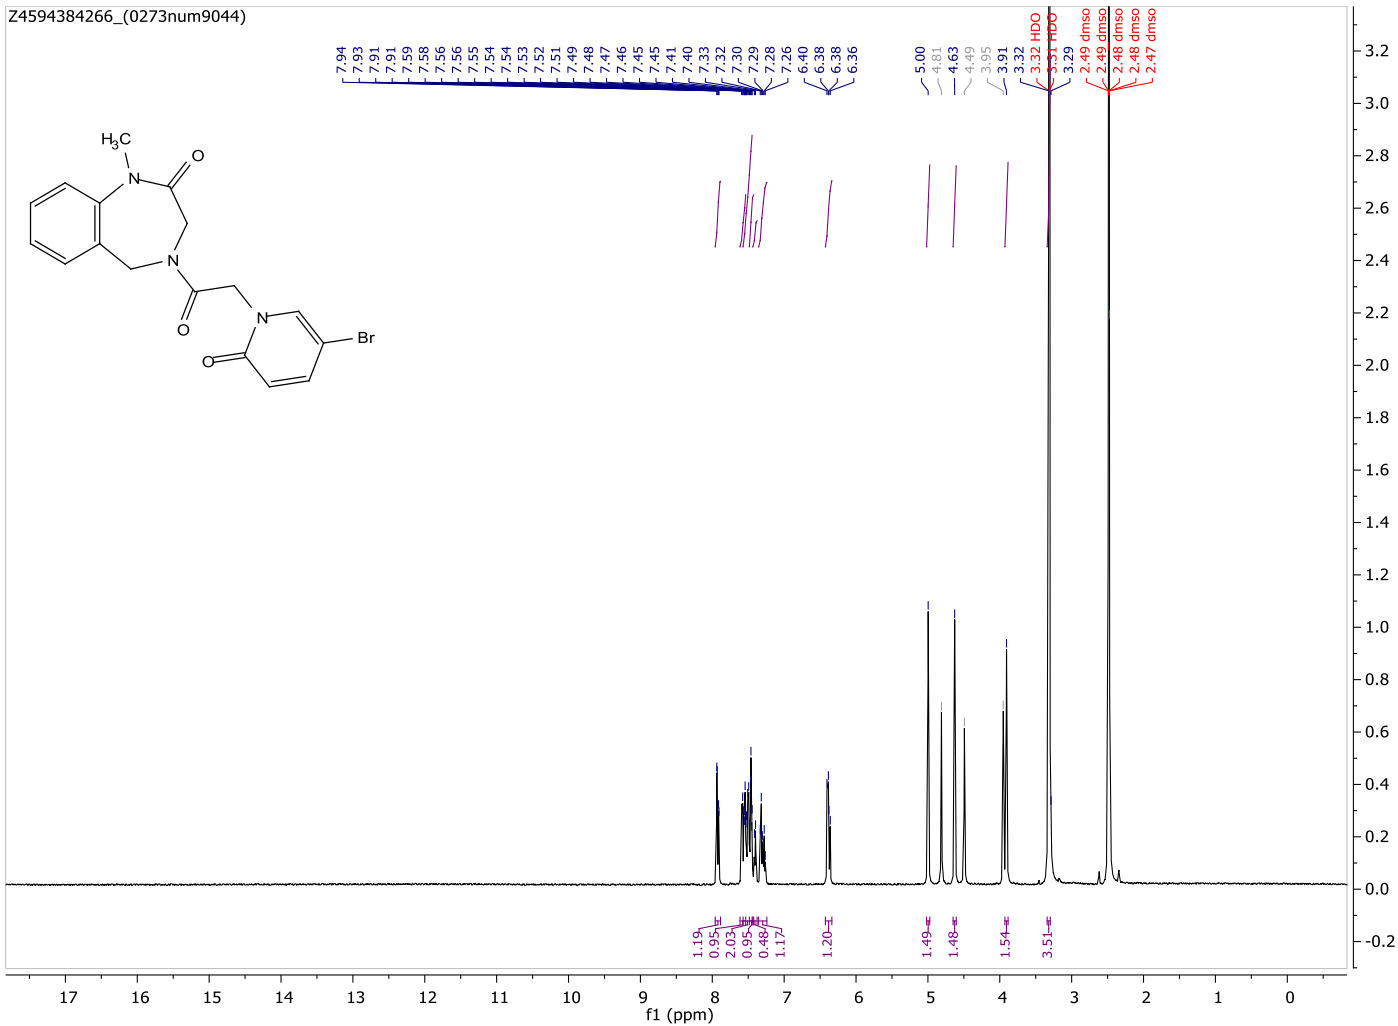

# S081659\$1

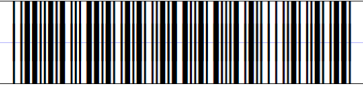

MaxPeak: 100.00%  
Ret\_Time: 0.941 min

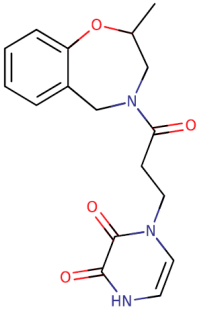

Mol Wt 329.35  
Exact Mass 329.15

| # | Time  | Area%  |
|---|-------|--------|
| 1 | 0.941 | 100.00 |

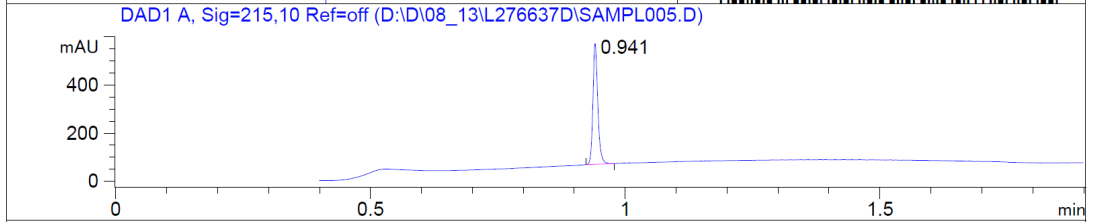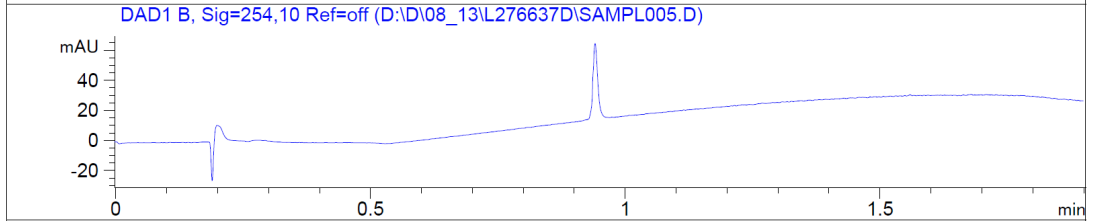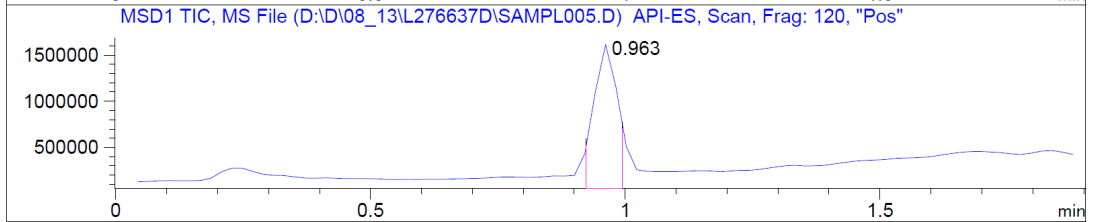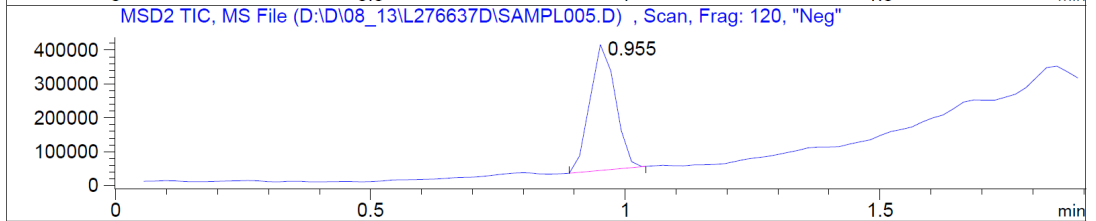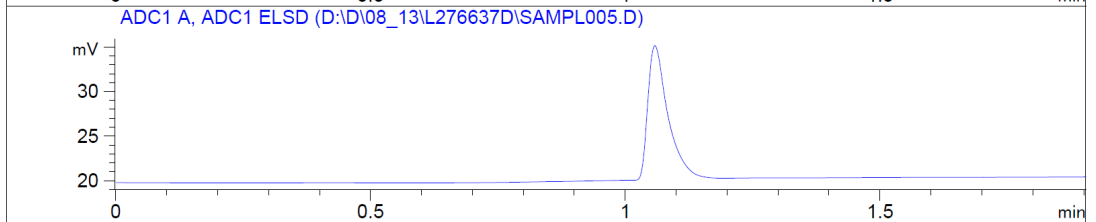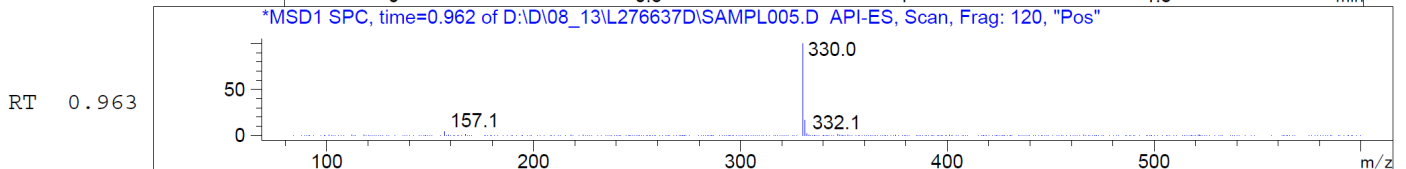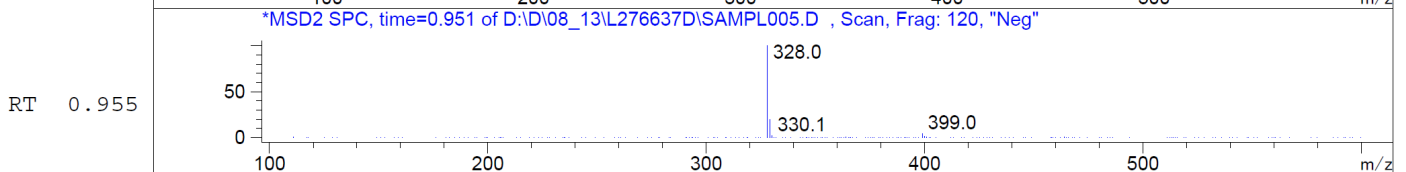

Z2230166392\_(0273num3613.2)

Z2230166392\_(0273num3613.2)

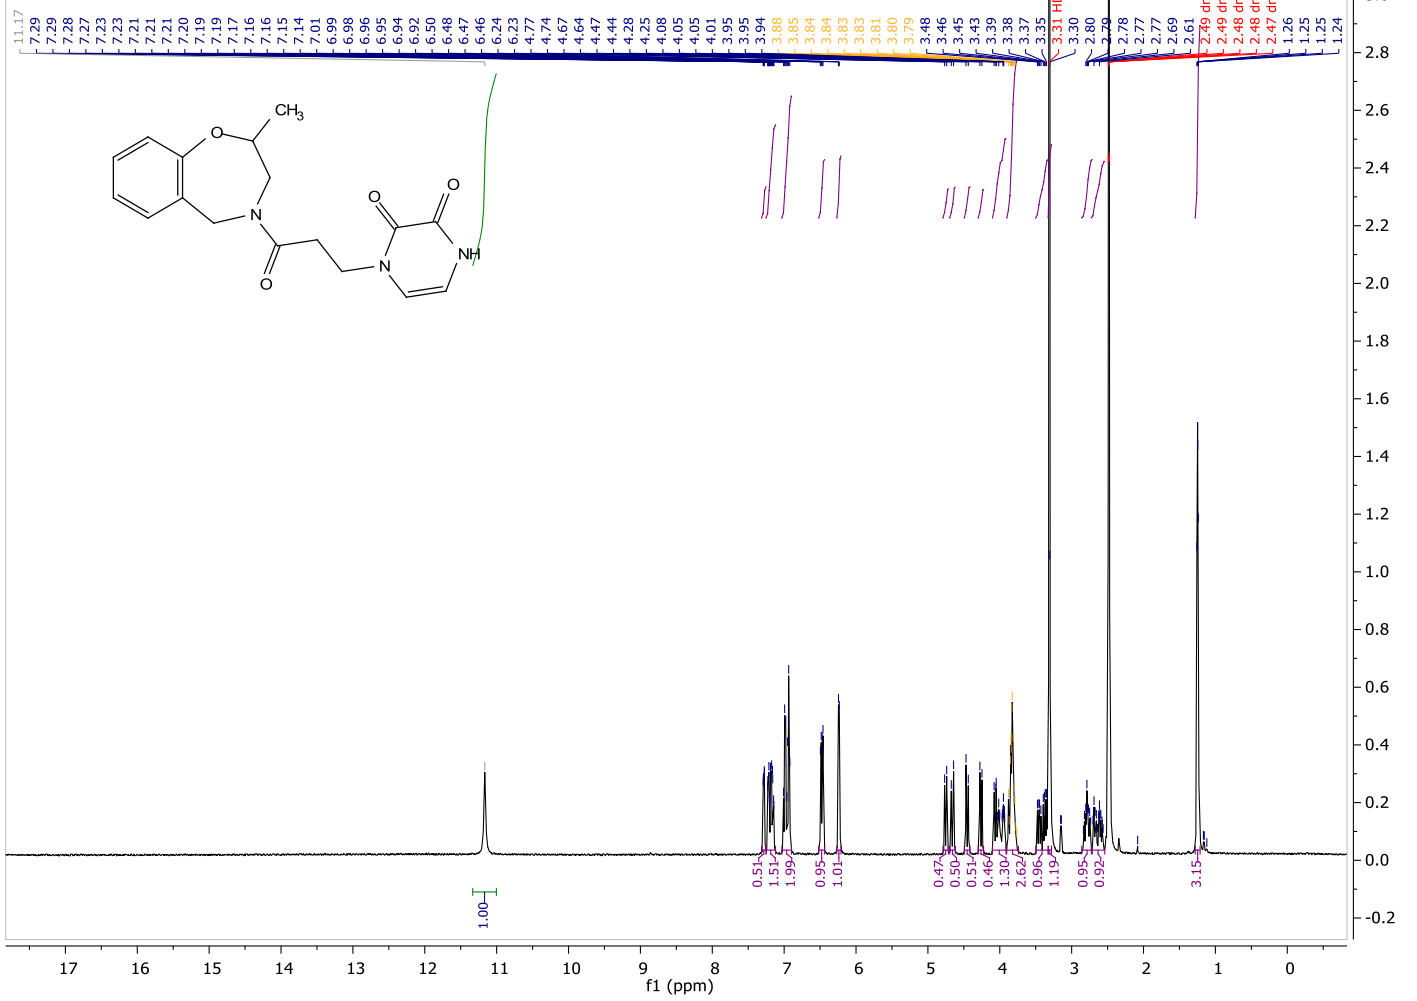

MaxPeak: 100.00%  
Ret\_Time: 1.280 min

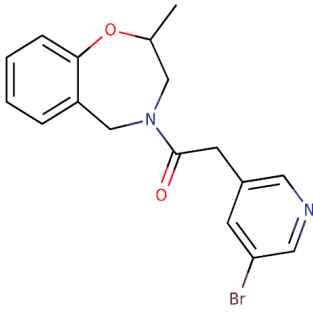

Mol Wt 361.23  
Exact Mass 360.07

| # | Time  | Area%  |
|---|-------|--------|
| 1 | 1.280 | 100.00 |

S081639\$2

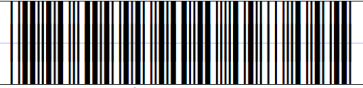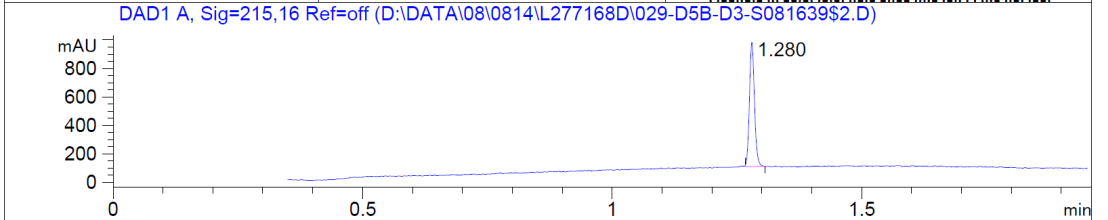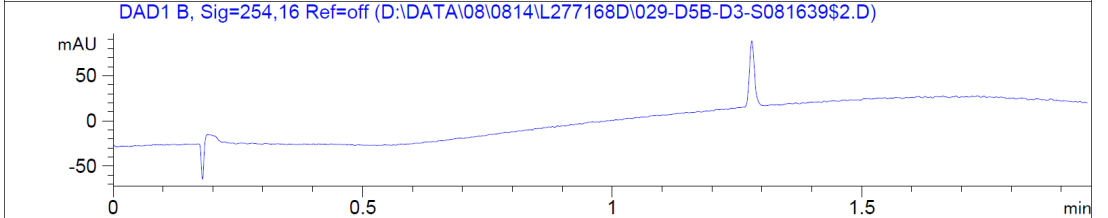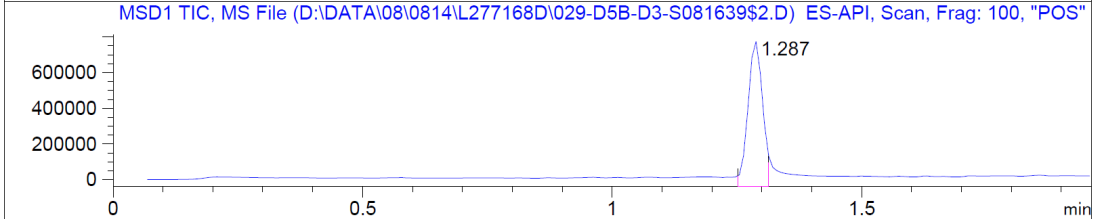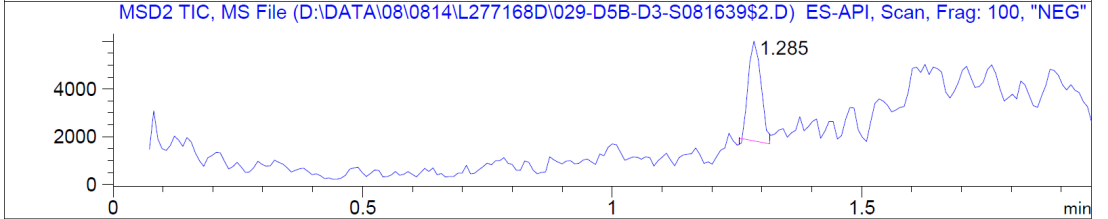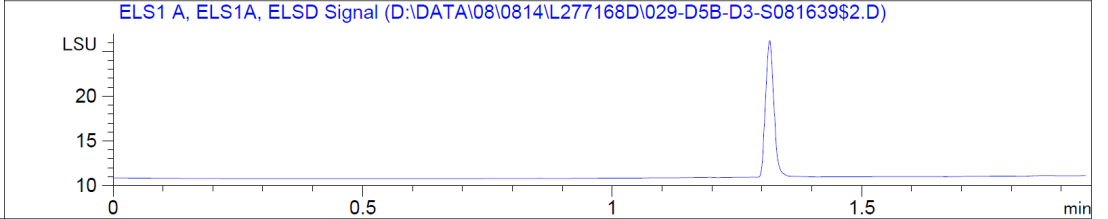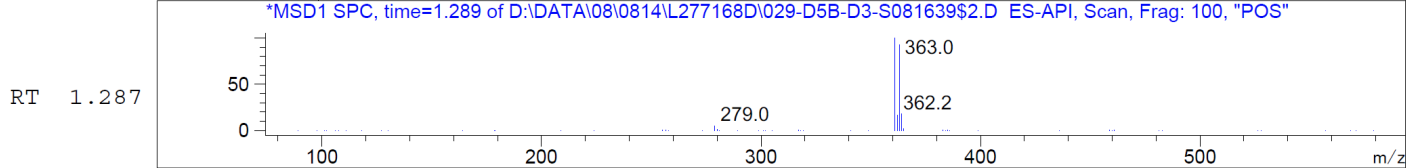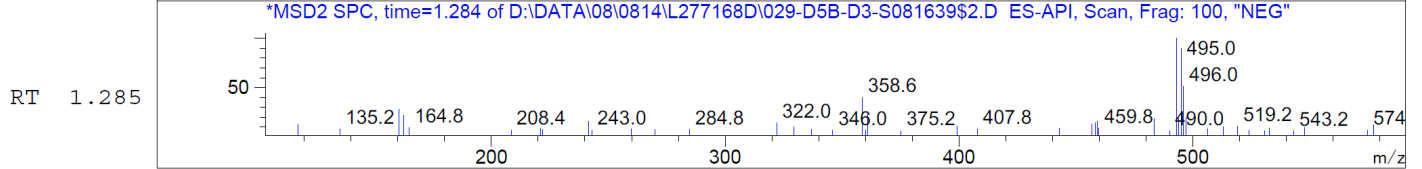

Z3201310989\_(0273num3247.2)

Z3201310989\_(0273num3247.2)

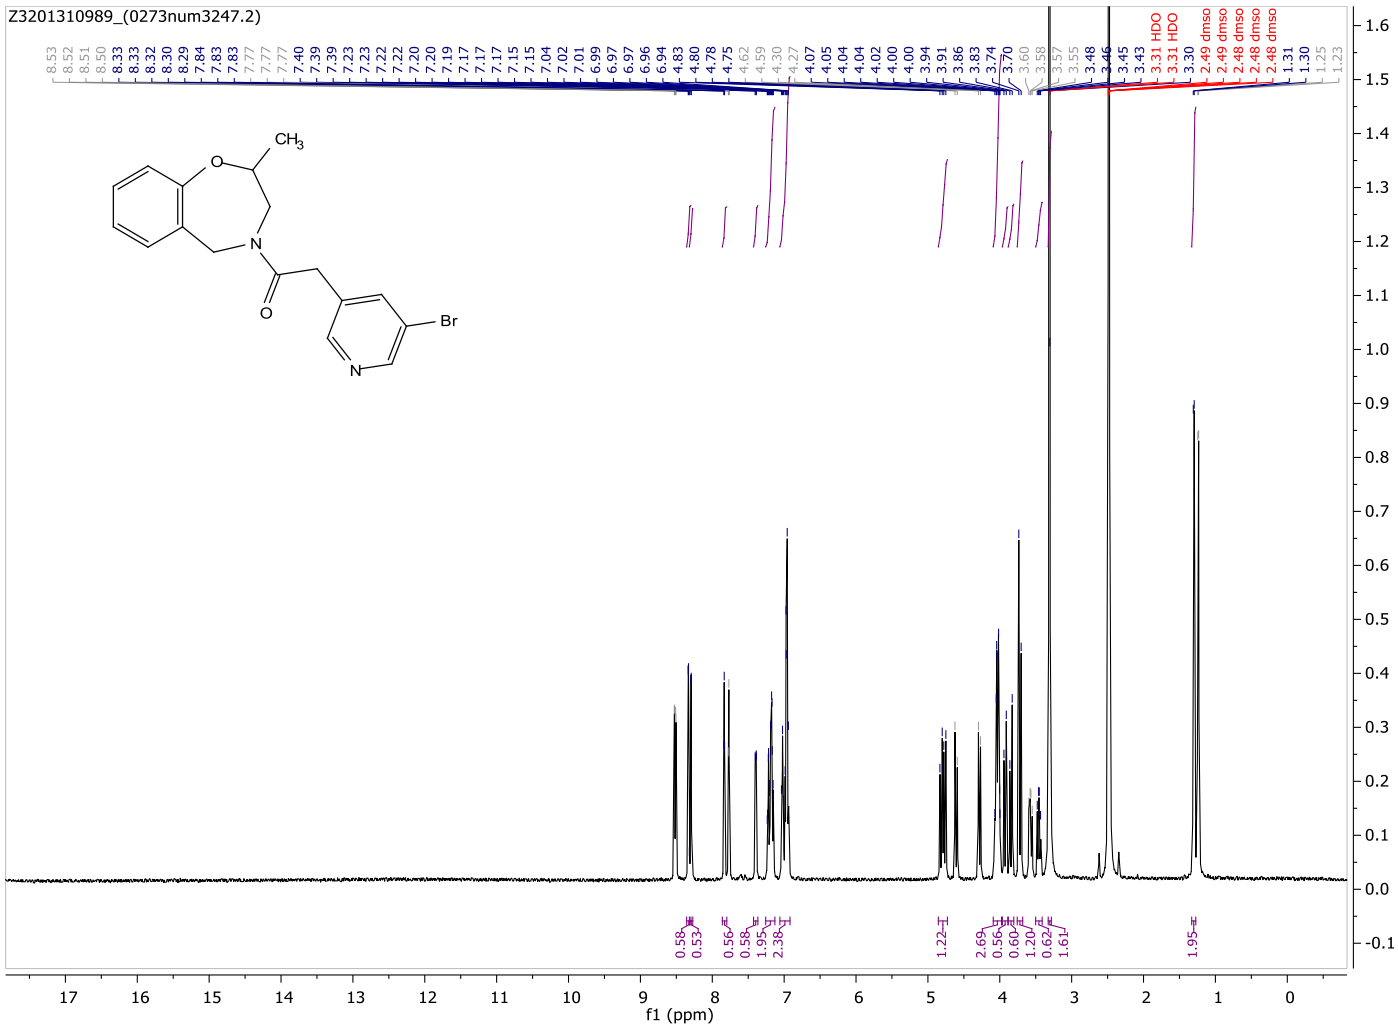

MaxPeak: 100.00%  
Ret\_Time: 1.122 min

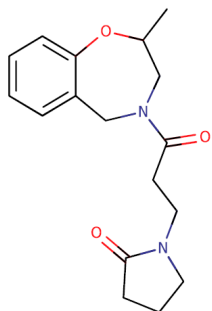

Mol Wt 302.37  
Exact Mass 302.19

| # | Time  | Area%  |
|---|-------|--------|
| 1 | 1.122 | 100.00 |

# S081643\$1

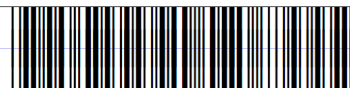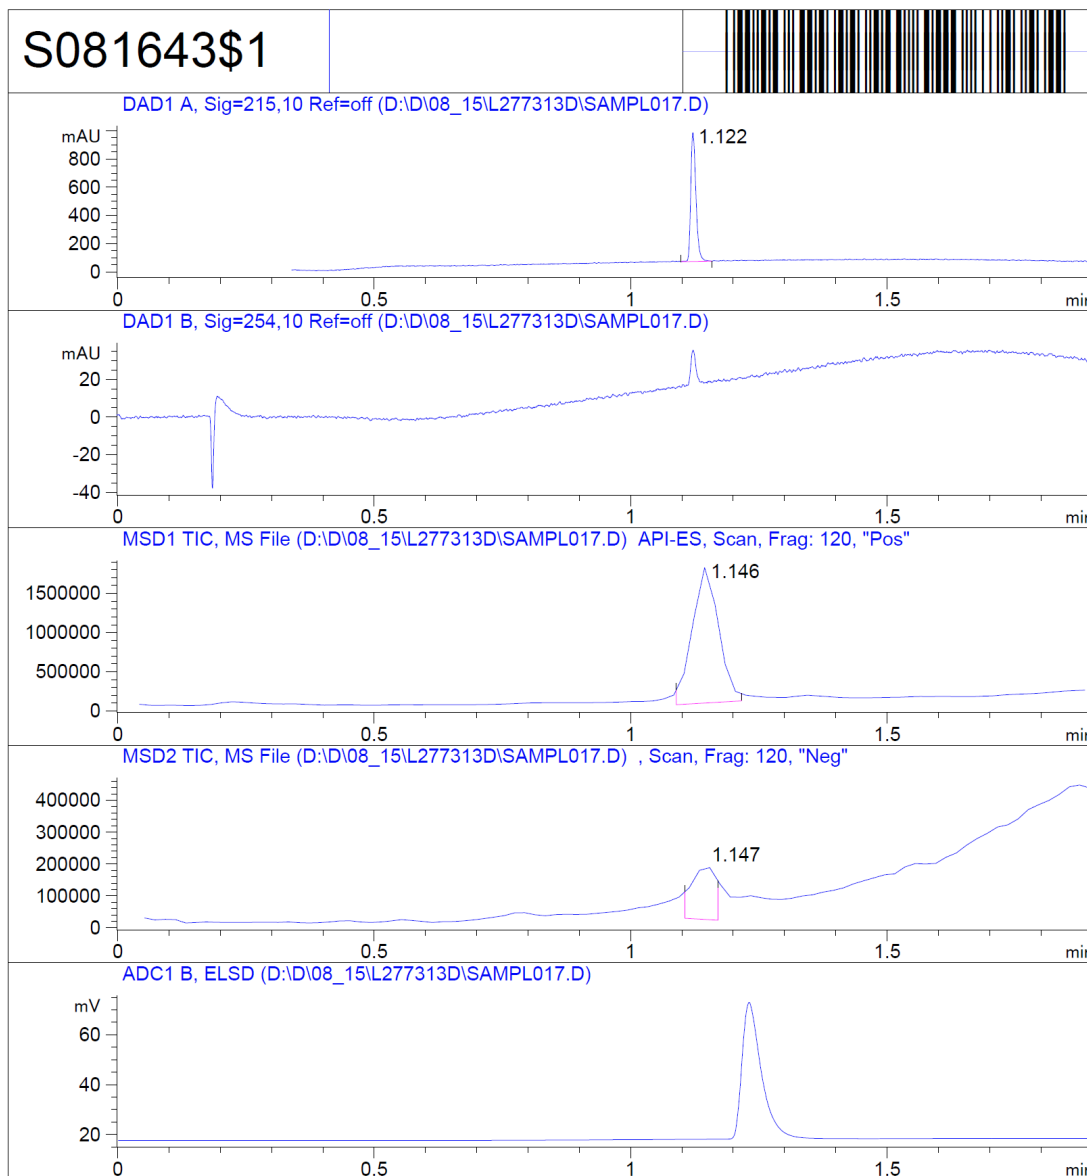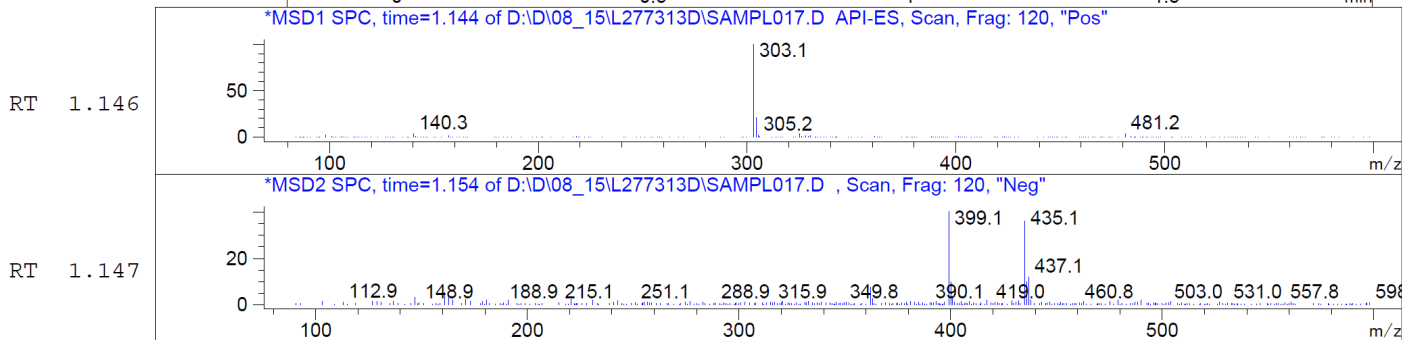

Z2227611595\_(0273num3604.2)

Z2227611595\_(0273num3604.2)

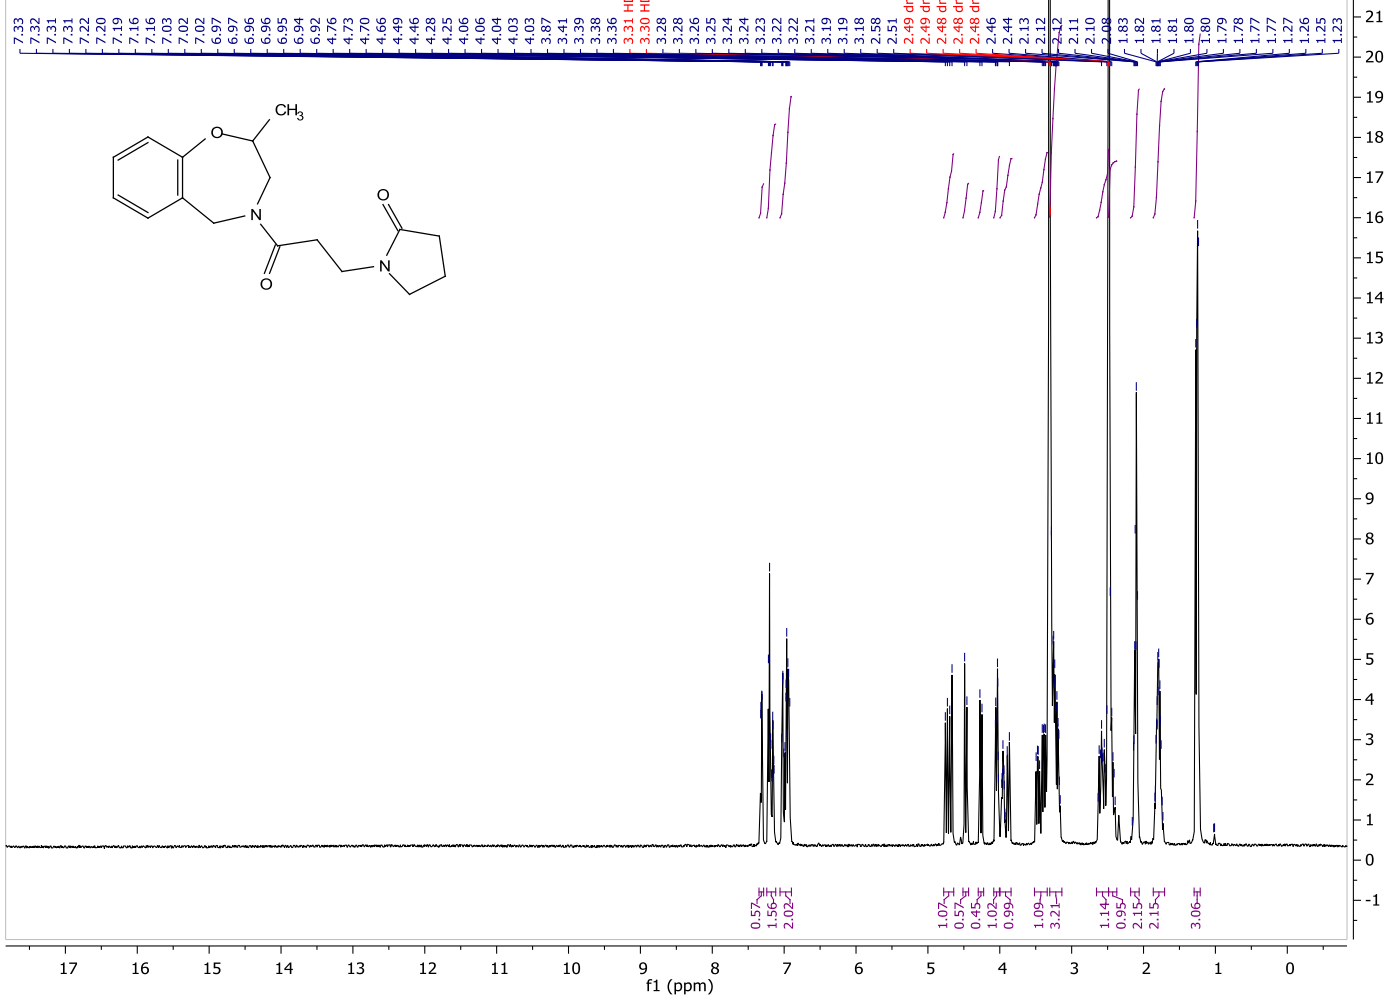



MaxPeak: 100.00%  
Ret\_Time: 1.205 min

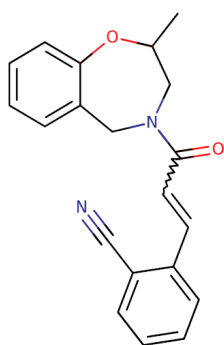

Mol Wt 318.37  
Exact Mass 318.16

| # | Time  | Area%  |
|---|-------|--------|
| 1 | 1.205 | 100.00 |

# S081660\$1

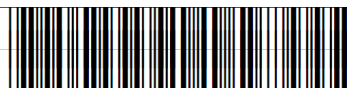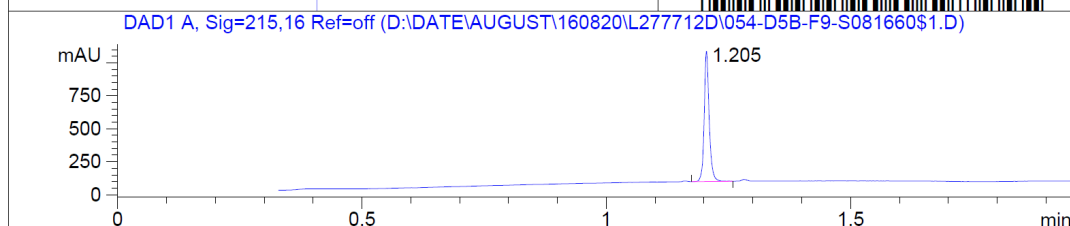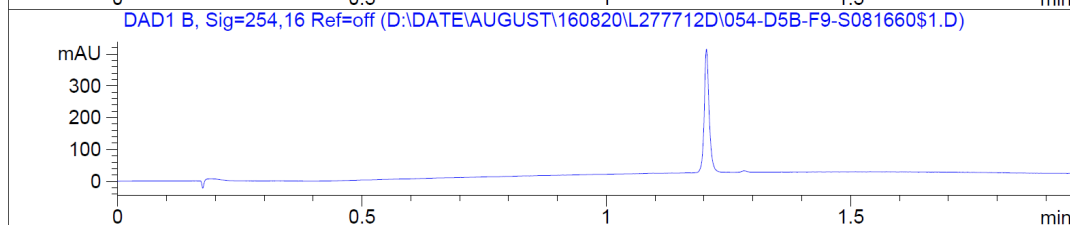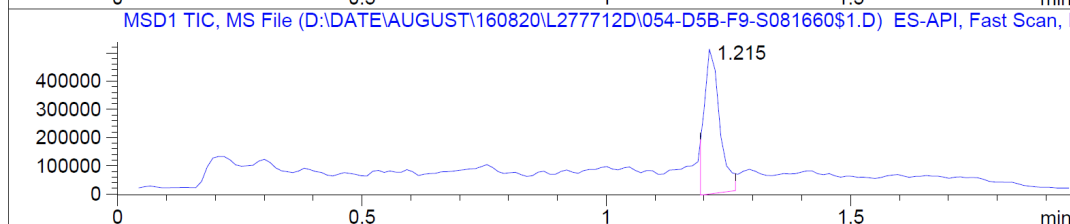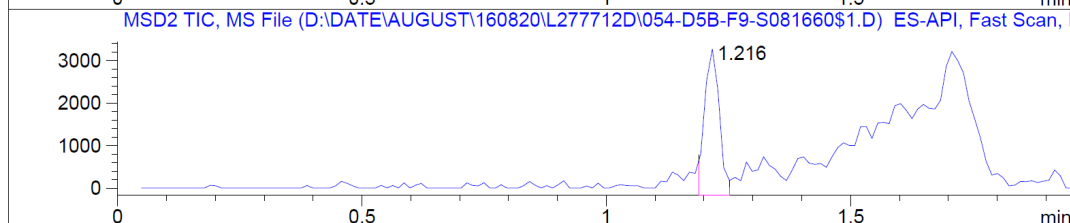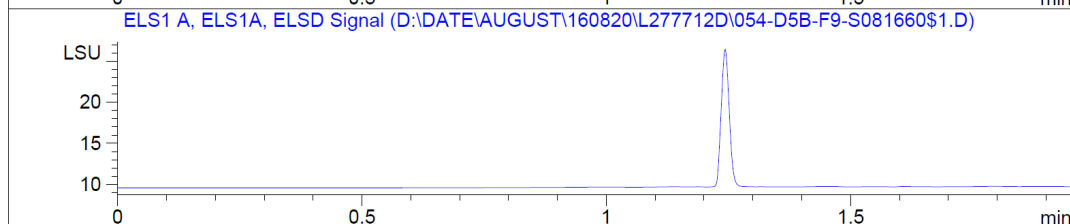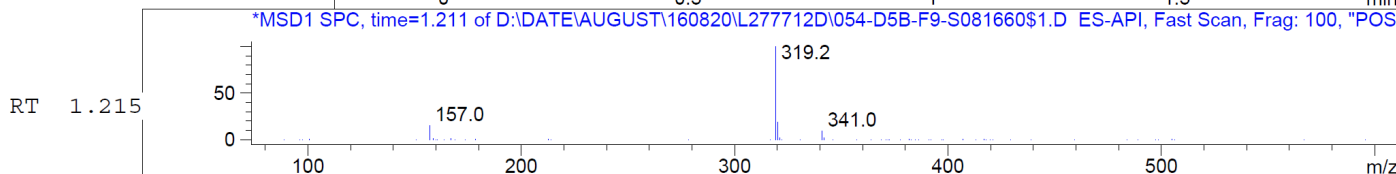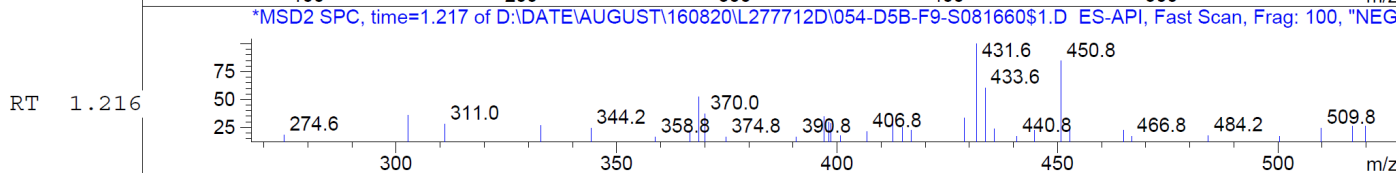

Z2230172883\_(0273num3343.2)

Z2230172883\_(0273num3343.2)

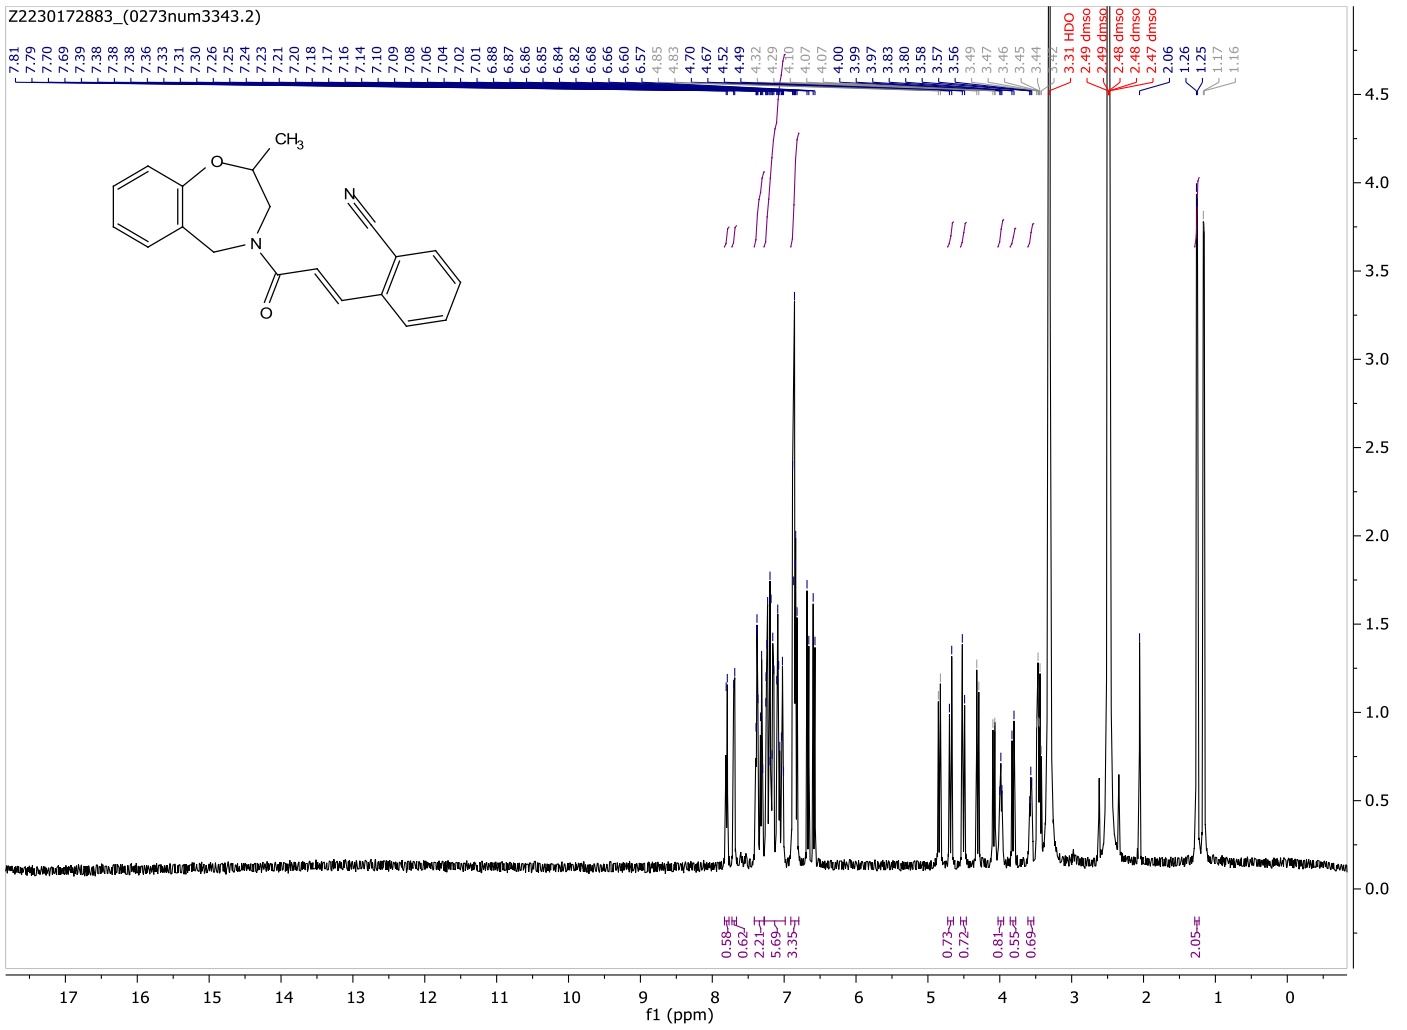

# S117856\$2

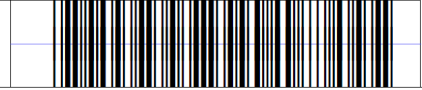

MaxPeak: 98.21%  
Ret\_Time: 1.386 min

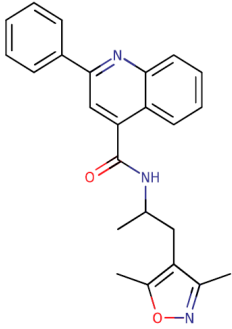

Mol Wt 385.46  
Exact Mass 385.21

| # | Time  | Area% |
|---|-------|-------|
| 1 | 1.386 | 98.21 |
| 2 | 1.465 | 1.79  |

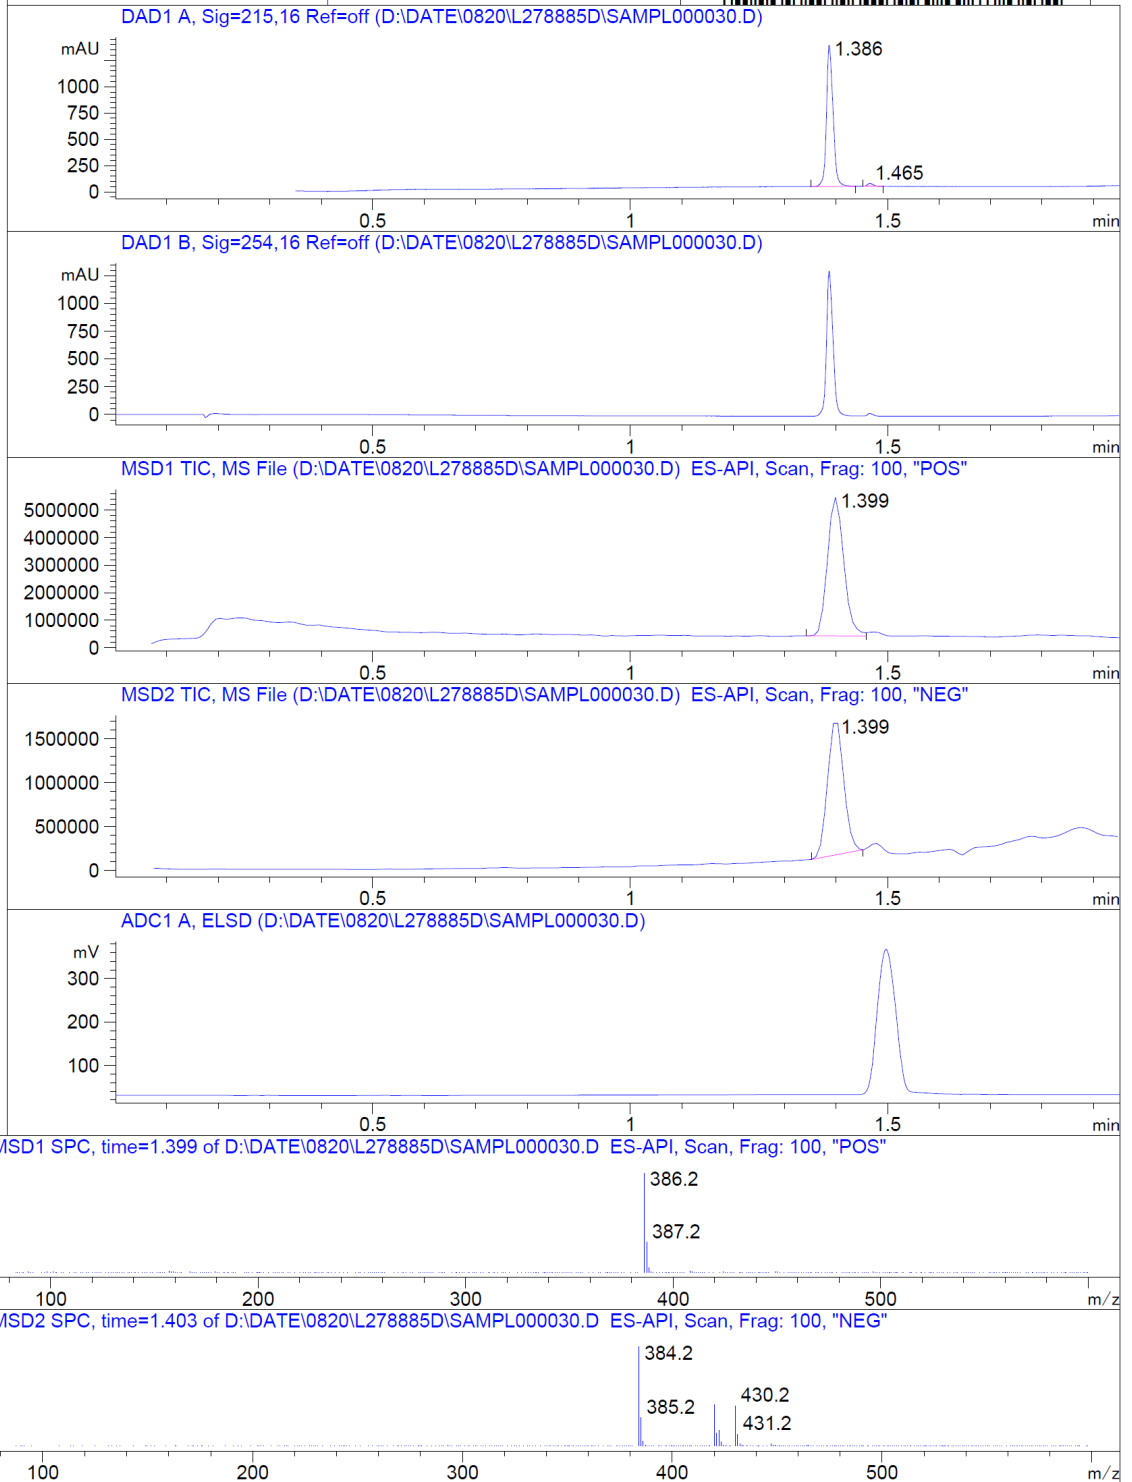

Z1239545406\_(3312num225.1)

Z1239545406\_(3312num225.1)

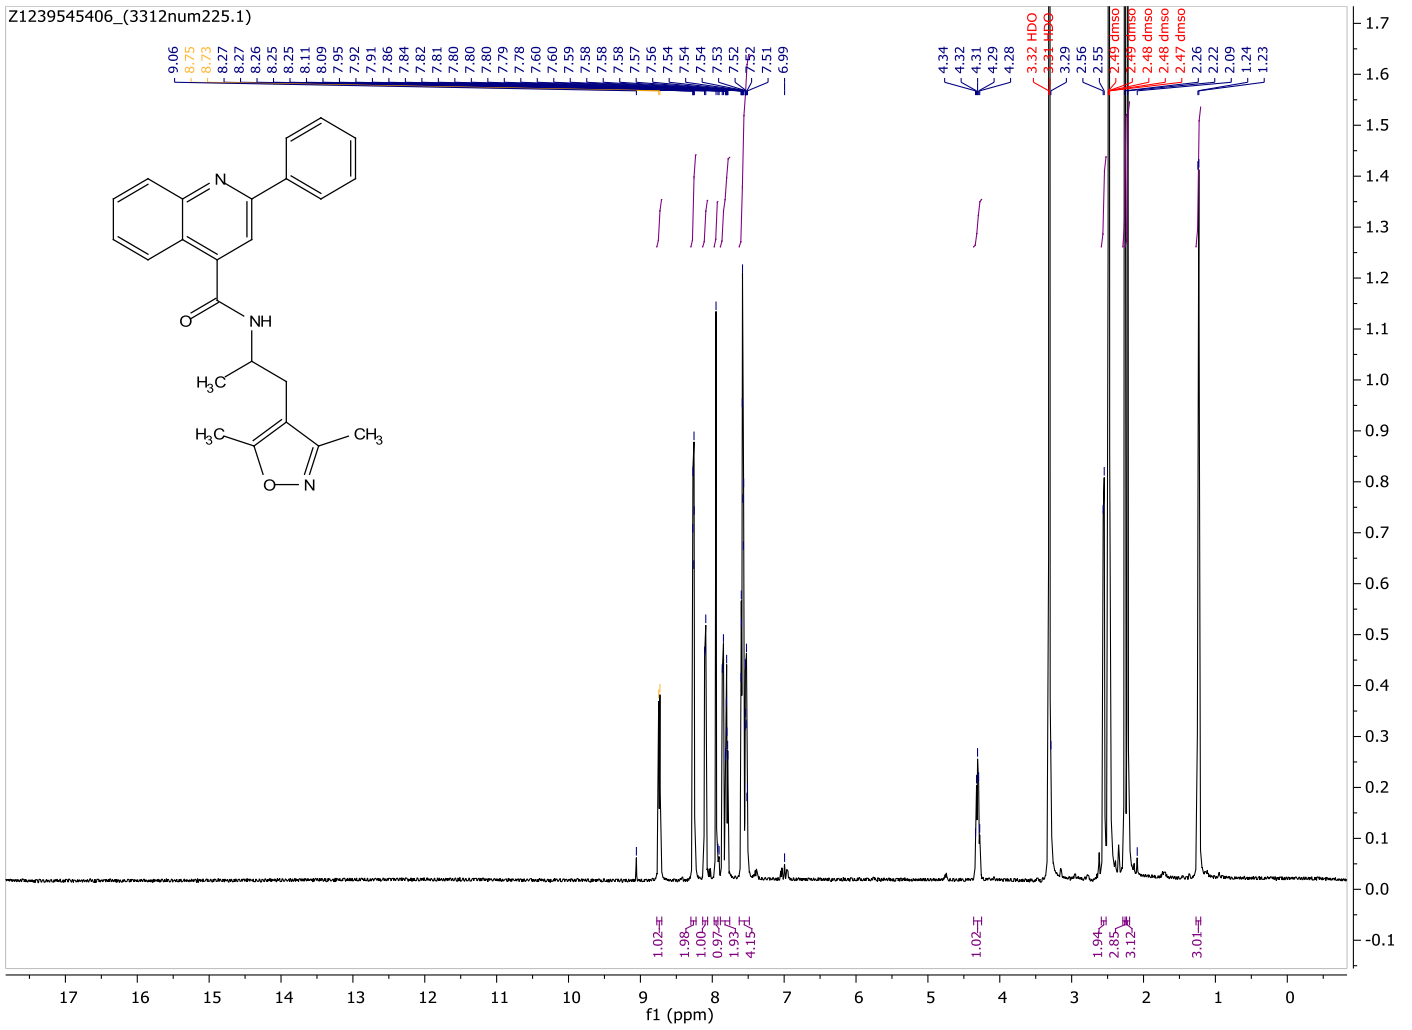

# S117850\$4

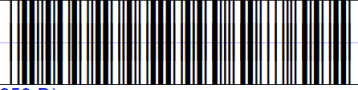

MaxPeak: 92.07%  
Ret\_Time: 0.916 min

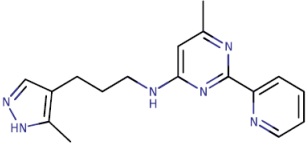

**Mol Wt** 308.38  
**Exact Mass** 308.2

| # | Time  | Area% |
|---|-------|-------|
| 1 | 0.875 | 7.93  |
| 2 | 0.916 | 92.07 |

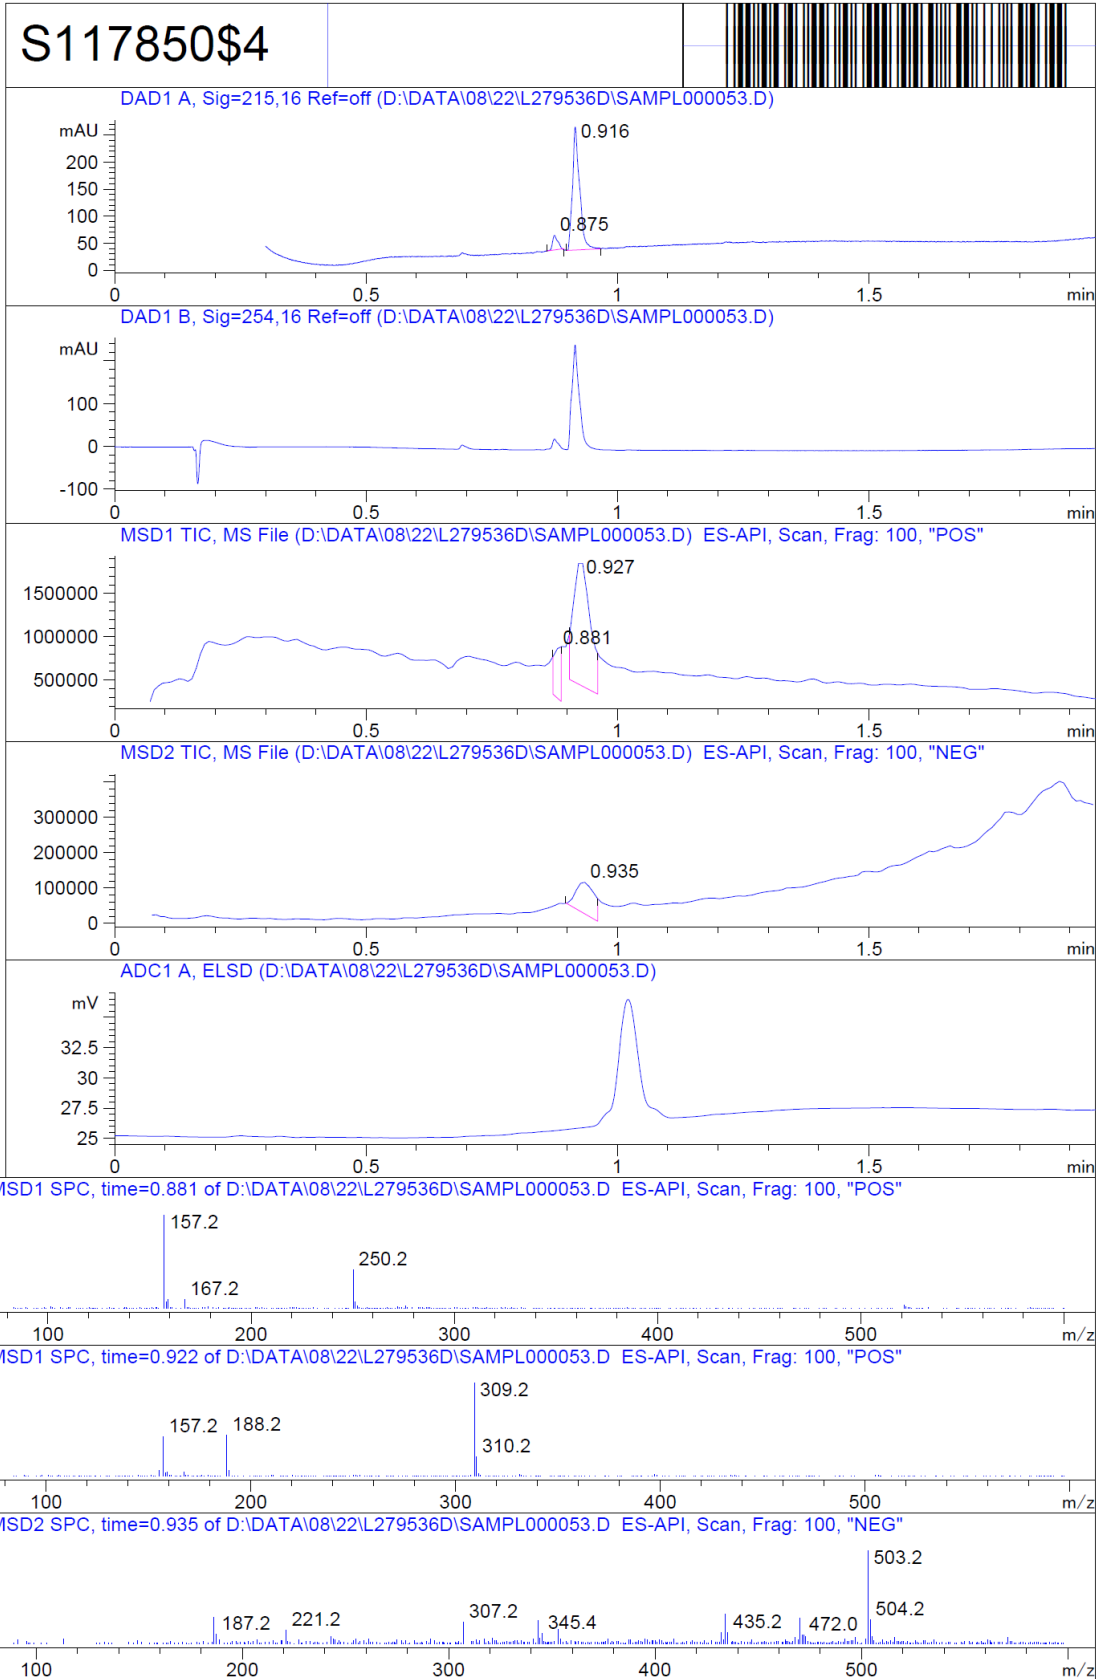

Z1168173619\_(3312num339)

Z1168173619\_(3312num339)

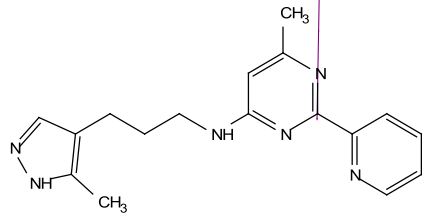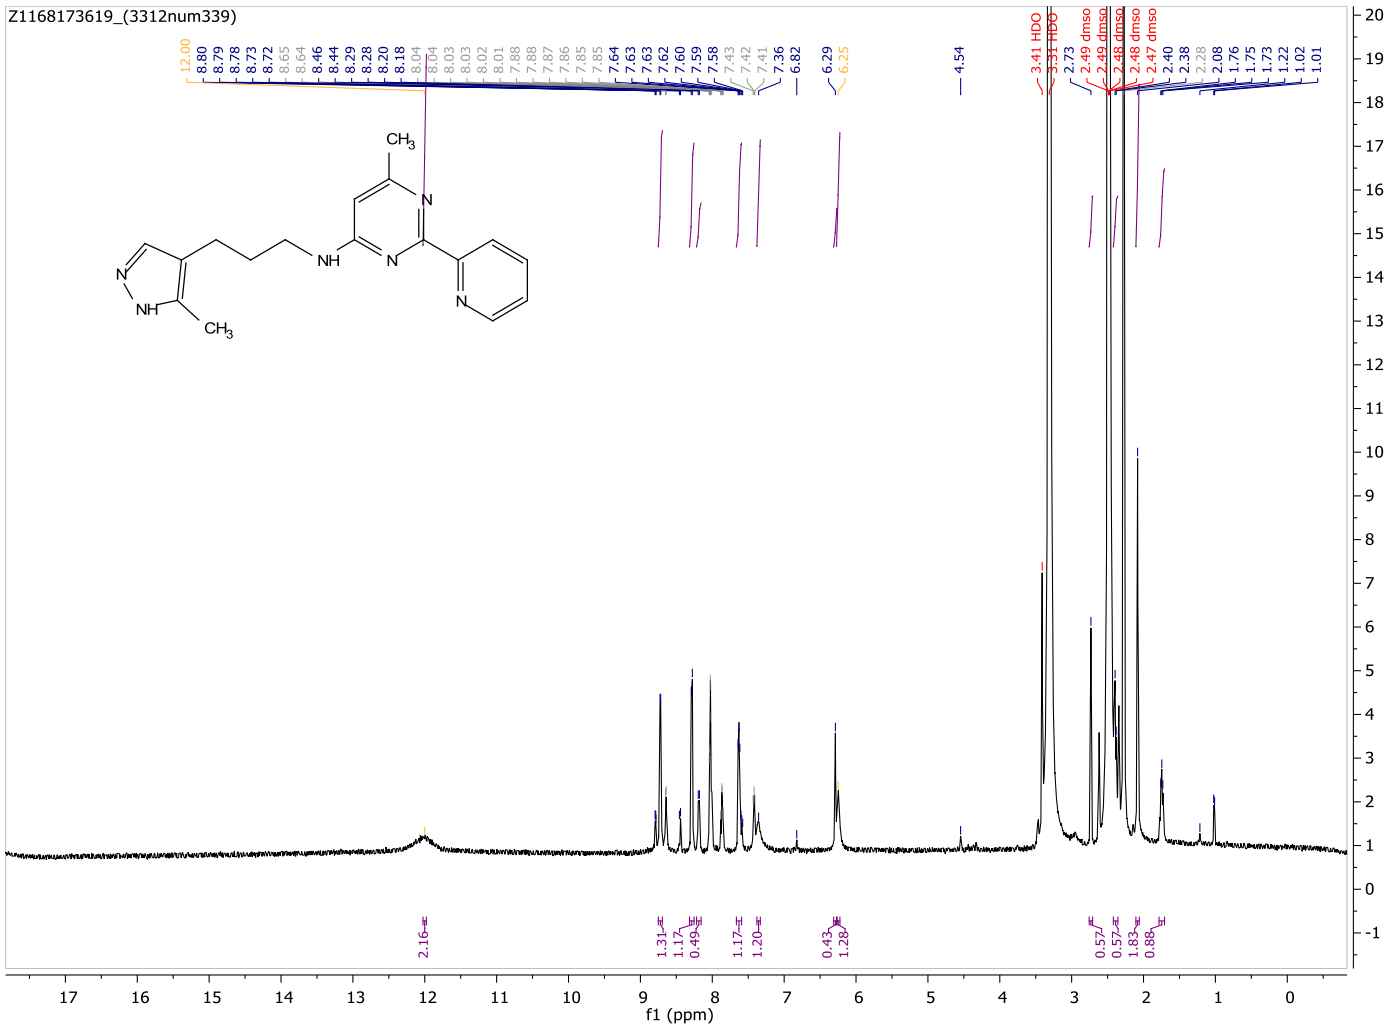

MaxPeak: 100.00%  
Ret\_Time: 1.247 min

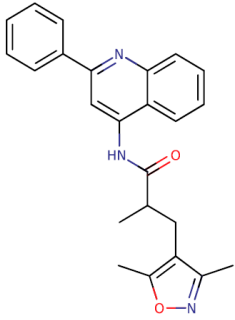

Mol Wt 385.46  
Exact Mass 385.21

| # | Time  | Area%  |
|---|-------|--------|
| 1 | 1.247 | 100.00 |

# S117851\$3

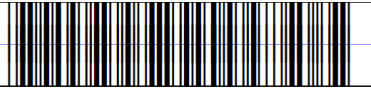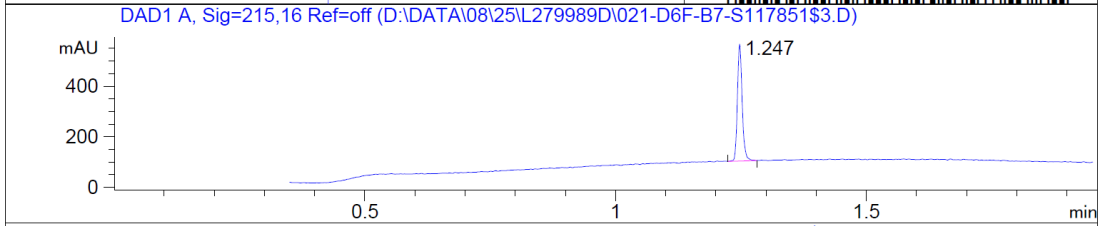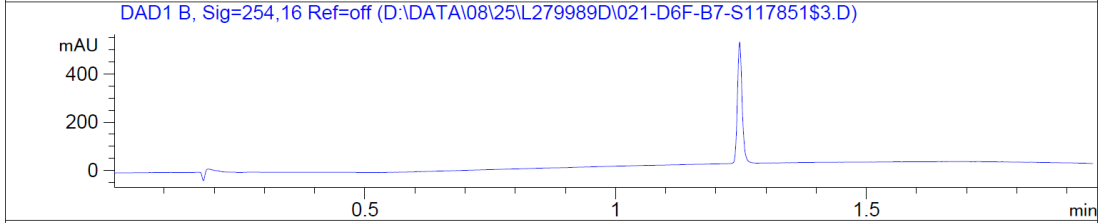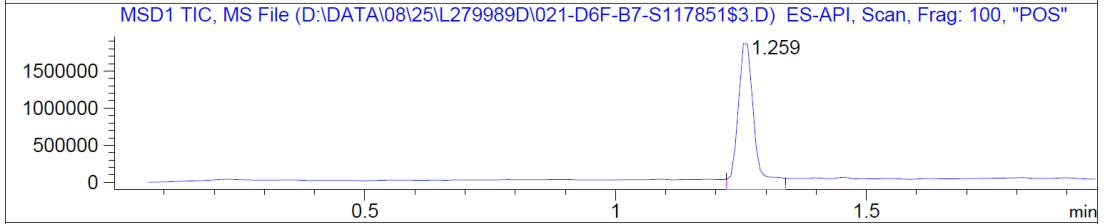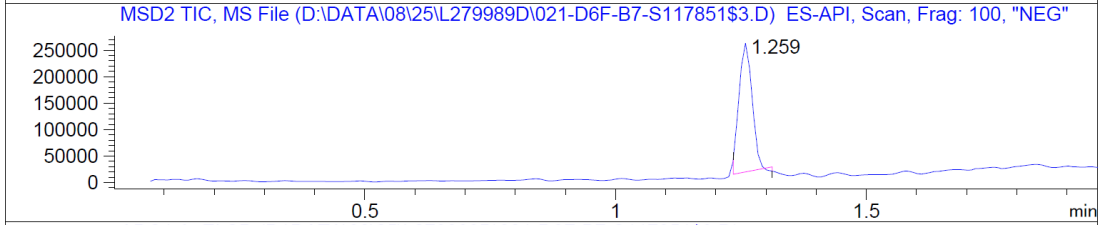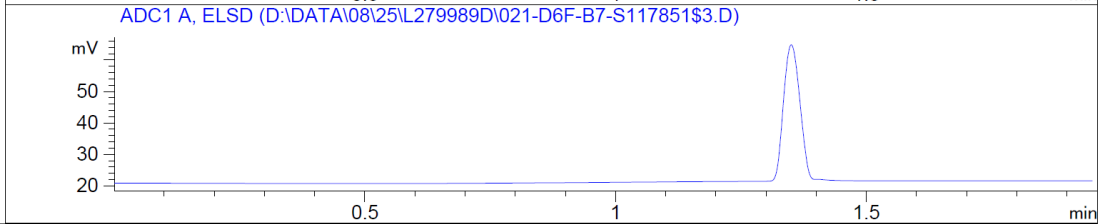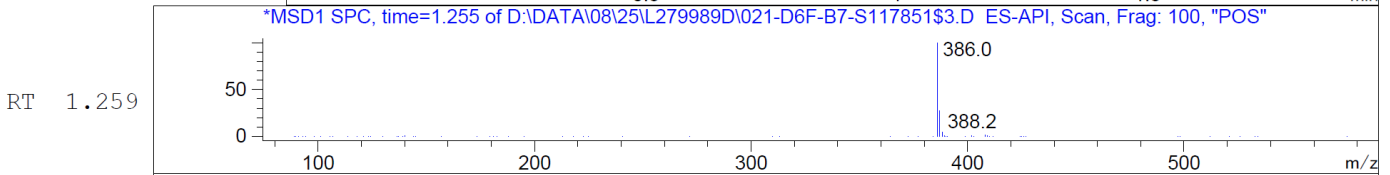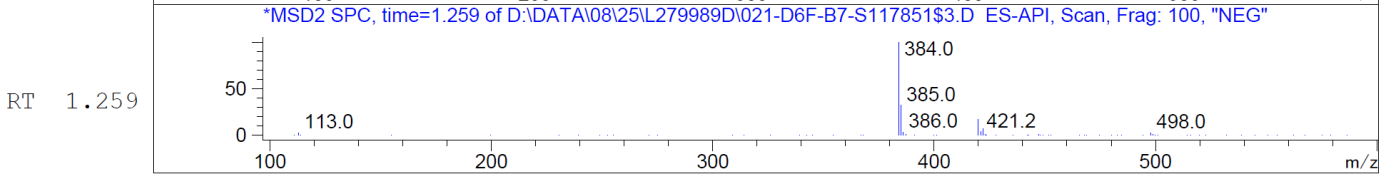

Z4570447323\_(3312num215.1)

Z4570447323\_(3312num215.1)

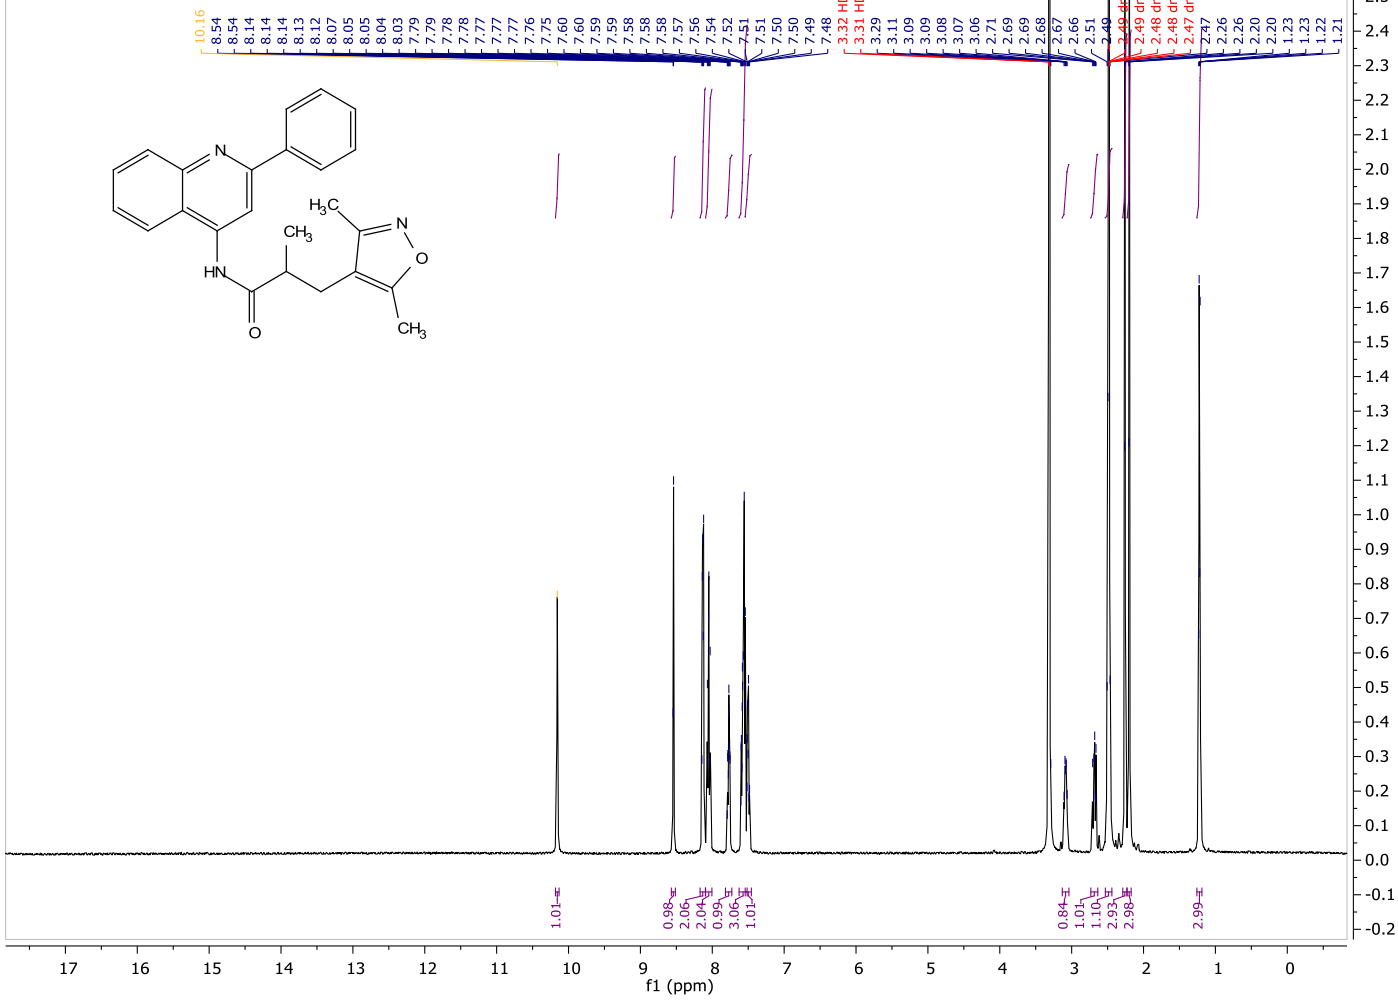



MaxPeak: 100.00%  
Ret\_Time: 1.035 min

# S299373\$1

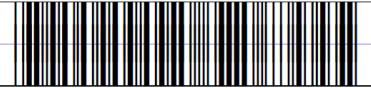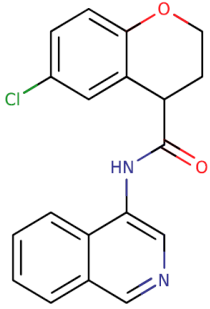

**Mol Wt** 338.79  
**Exact Mass** 338.1

| # | Time  | Area%  |
|---|-------|--------|
| 1 | 1.035 | 100.00 |

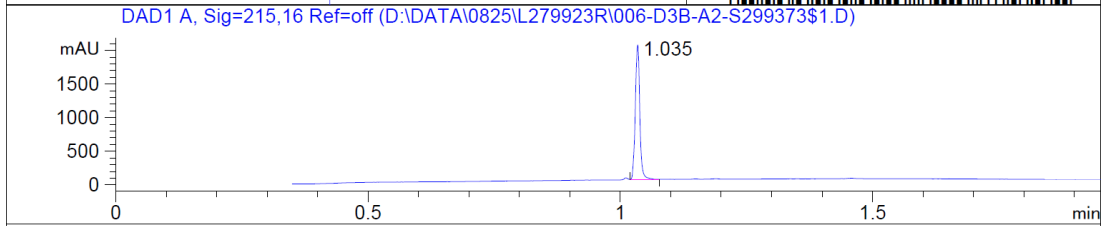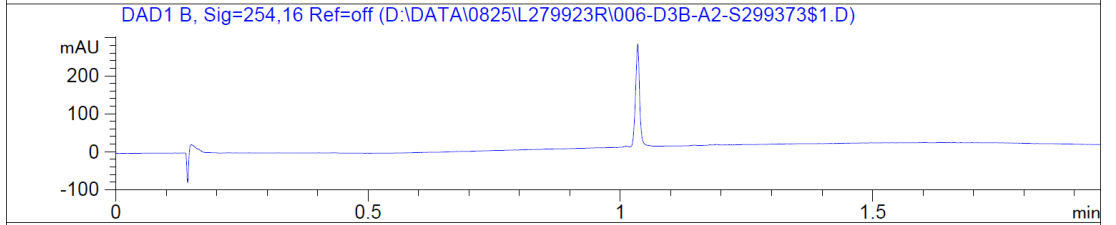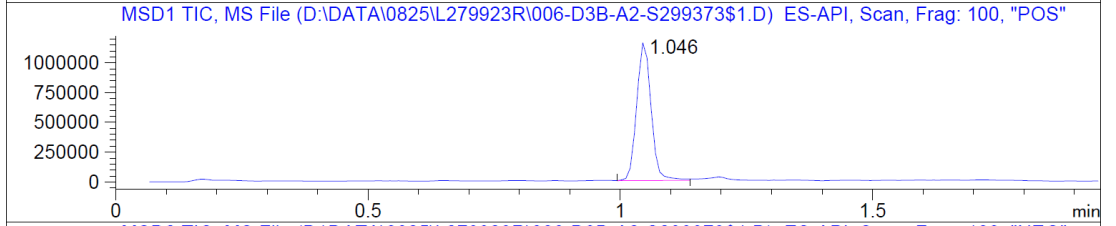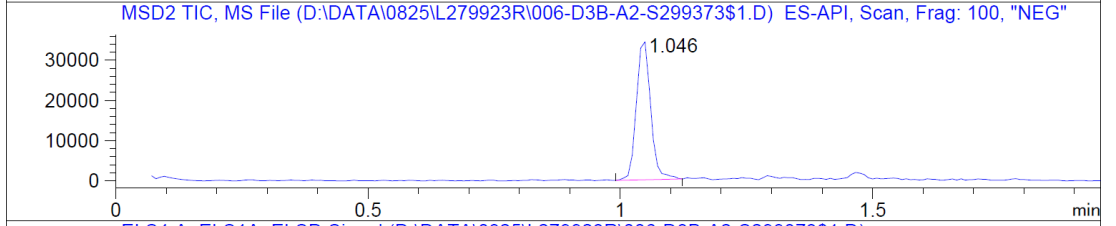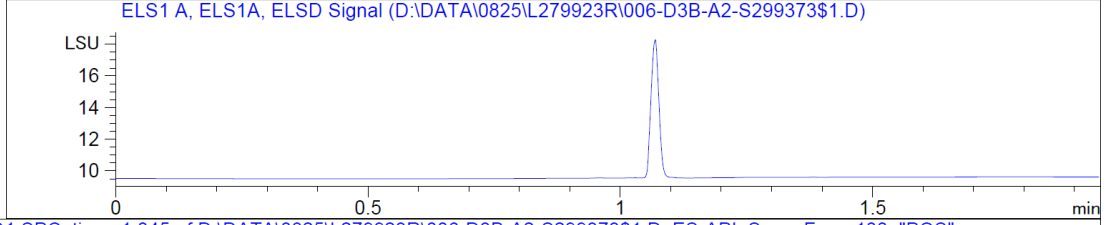

RT 1.046

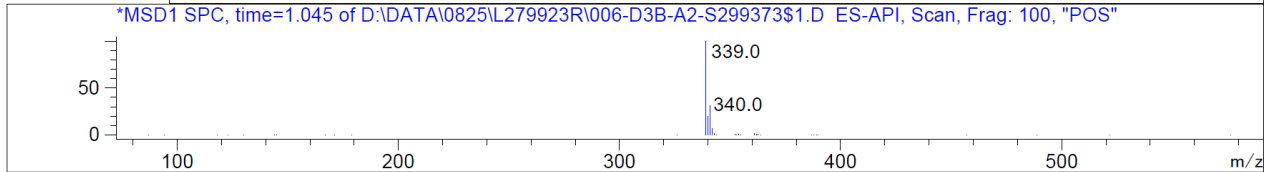

RT 1.046

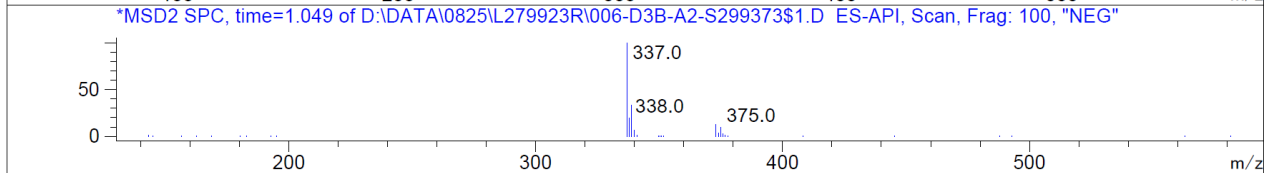

Z1675865540\_(EN300-27120704)

Z1675865540\_(EN300-27120704)

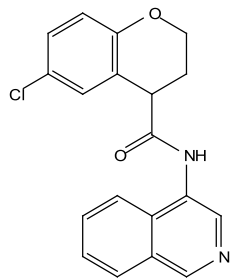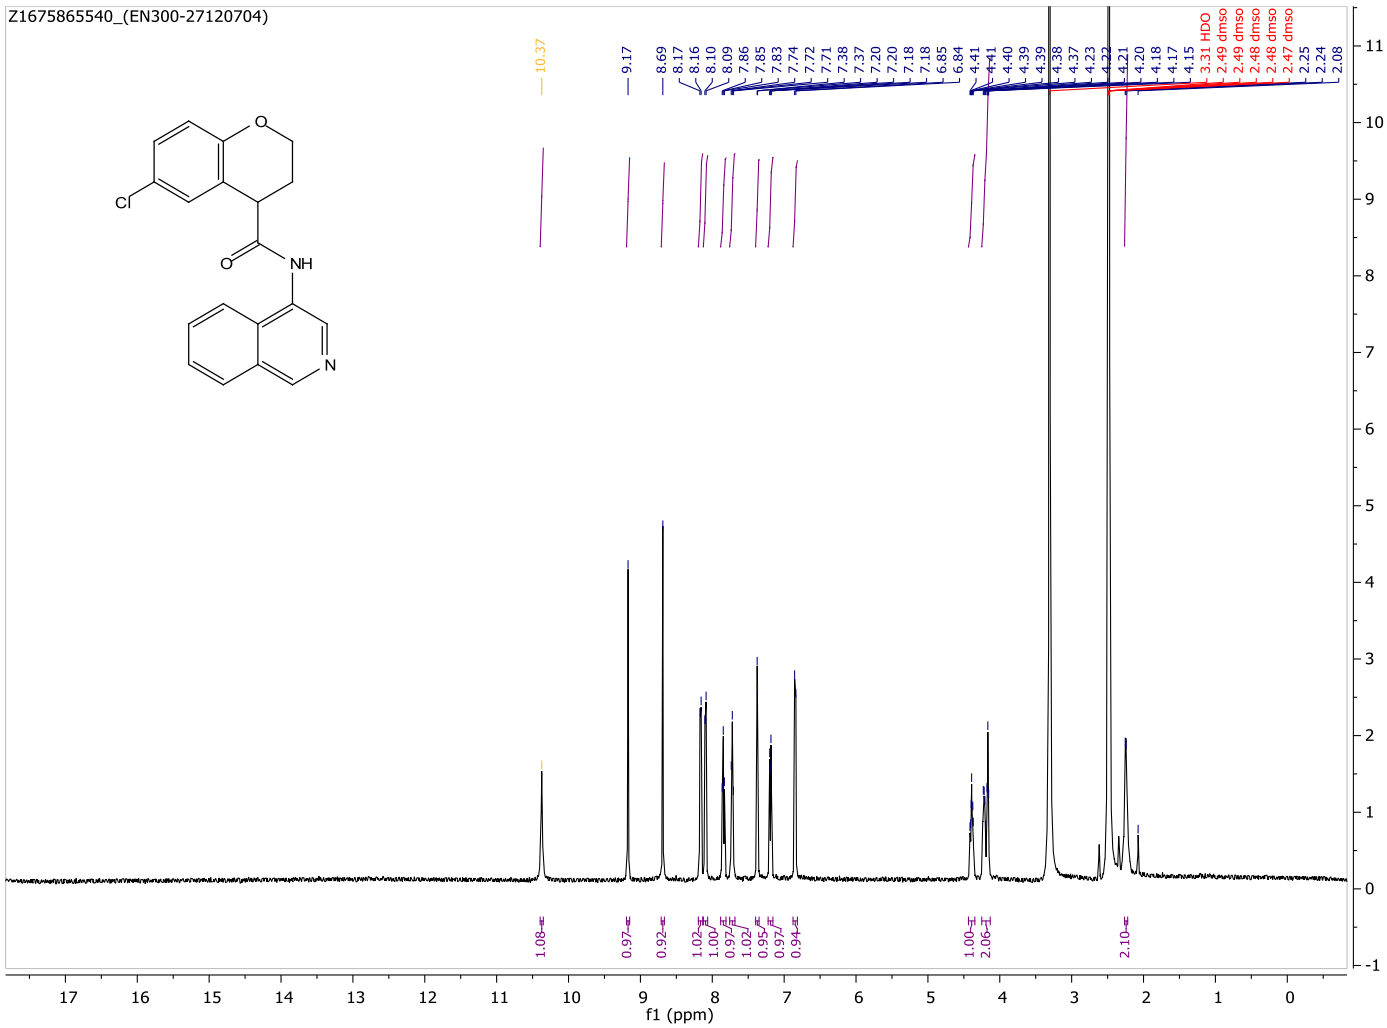

MaxPeak: 100.00%  
Ret\_Time: 1.012 min

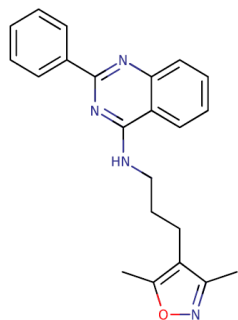

Mol Wt 358.44

Exact Mass 358.21

| # | Time  | Area%  |
|---|-------|--------|
| 1 | 1.012 | 100.00 |

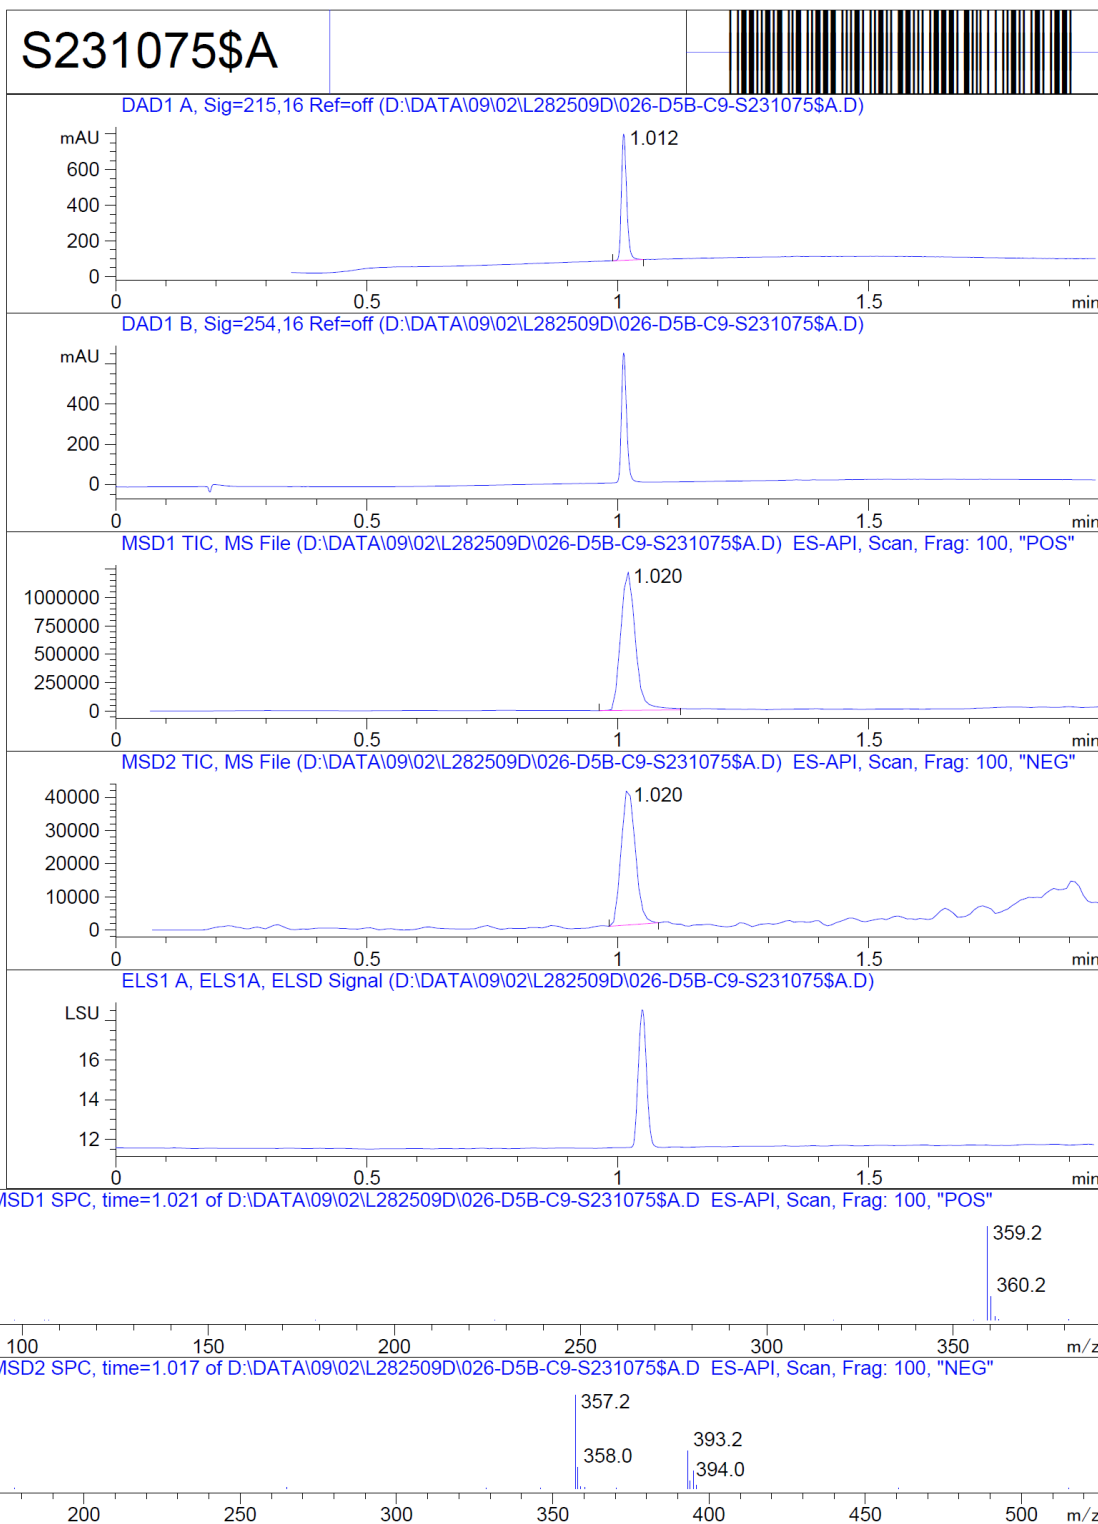

Z4600752345

Z4600752345

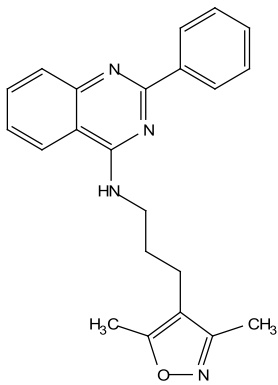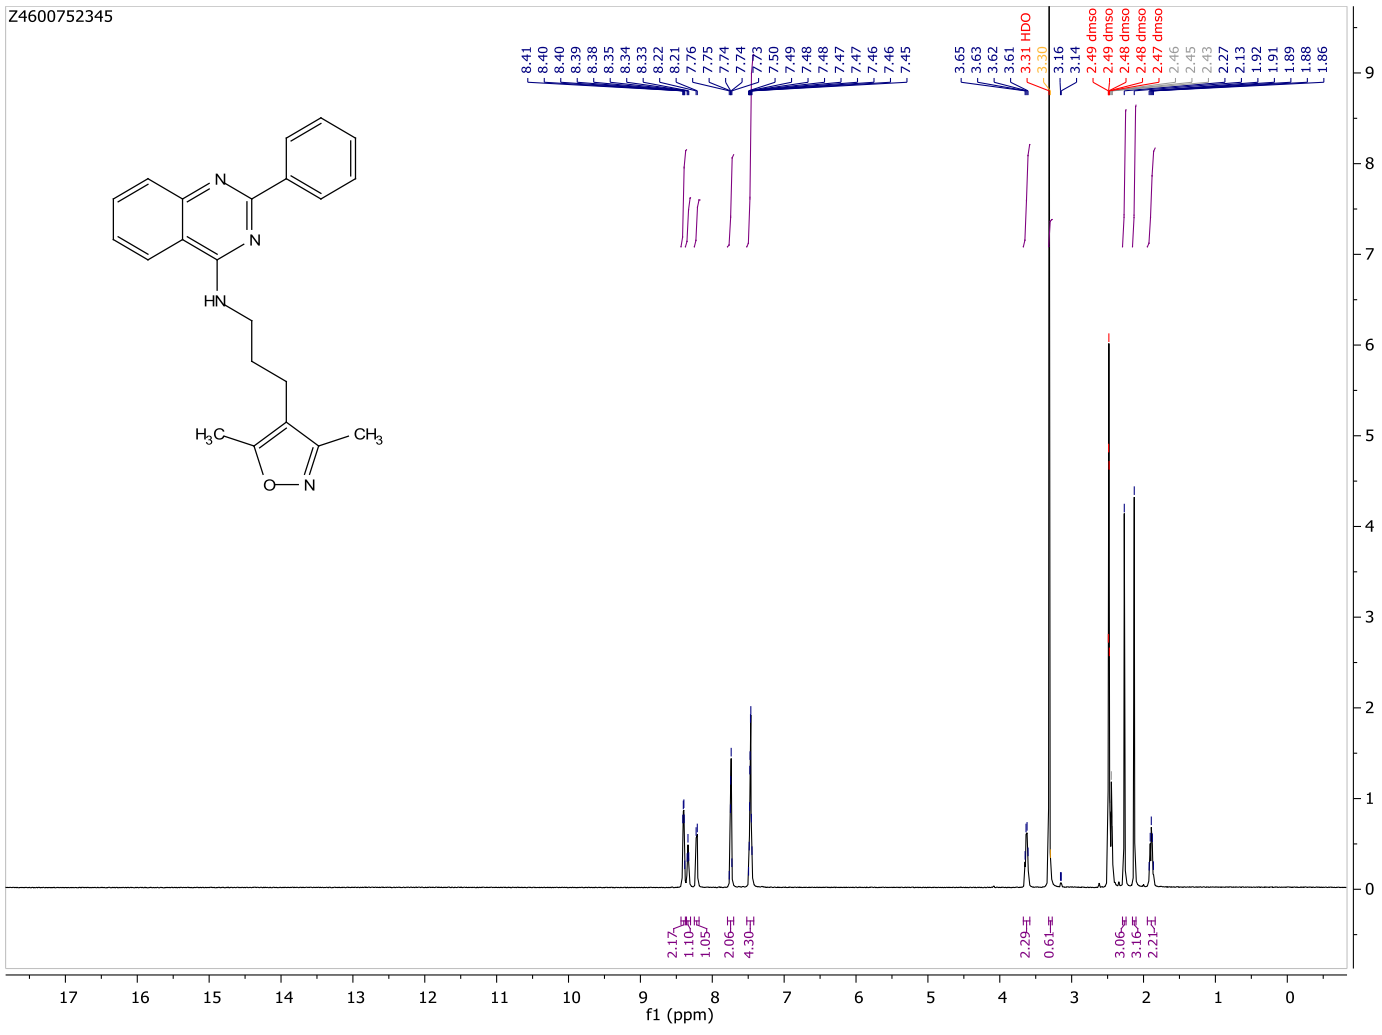

MaxPeak: 100.00%  
Ret\_Time: 0.788 min

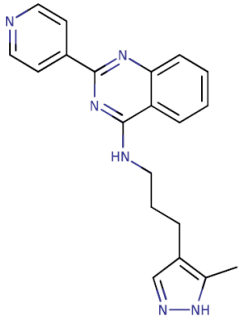

**Mol Wt** 344.41  
**Exact Mass** 344.2

| # | Time  | Area%  |
|---|-------|--------|
| 1 | 0.788 | 100.00 |

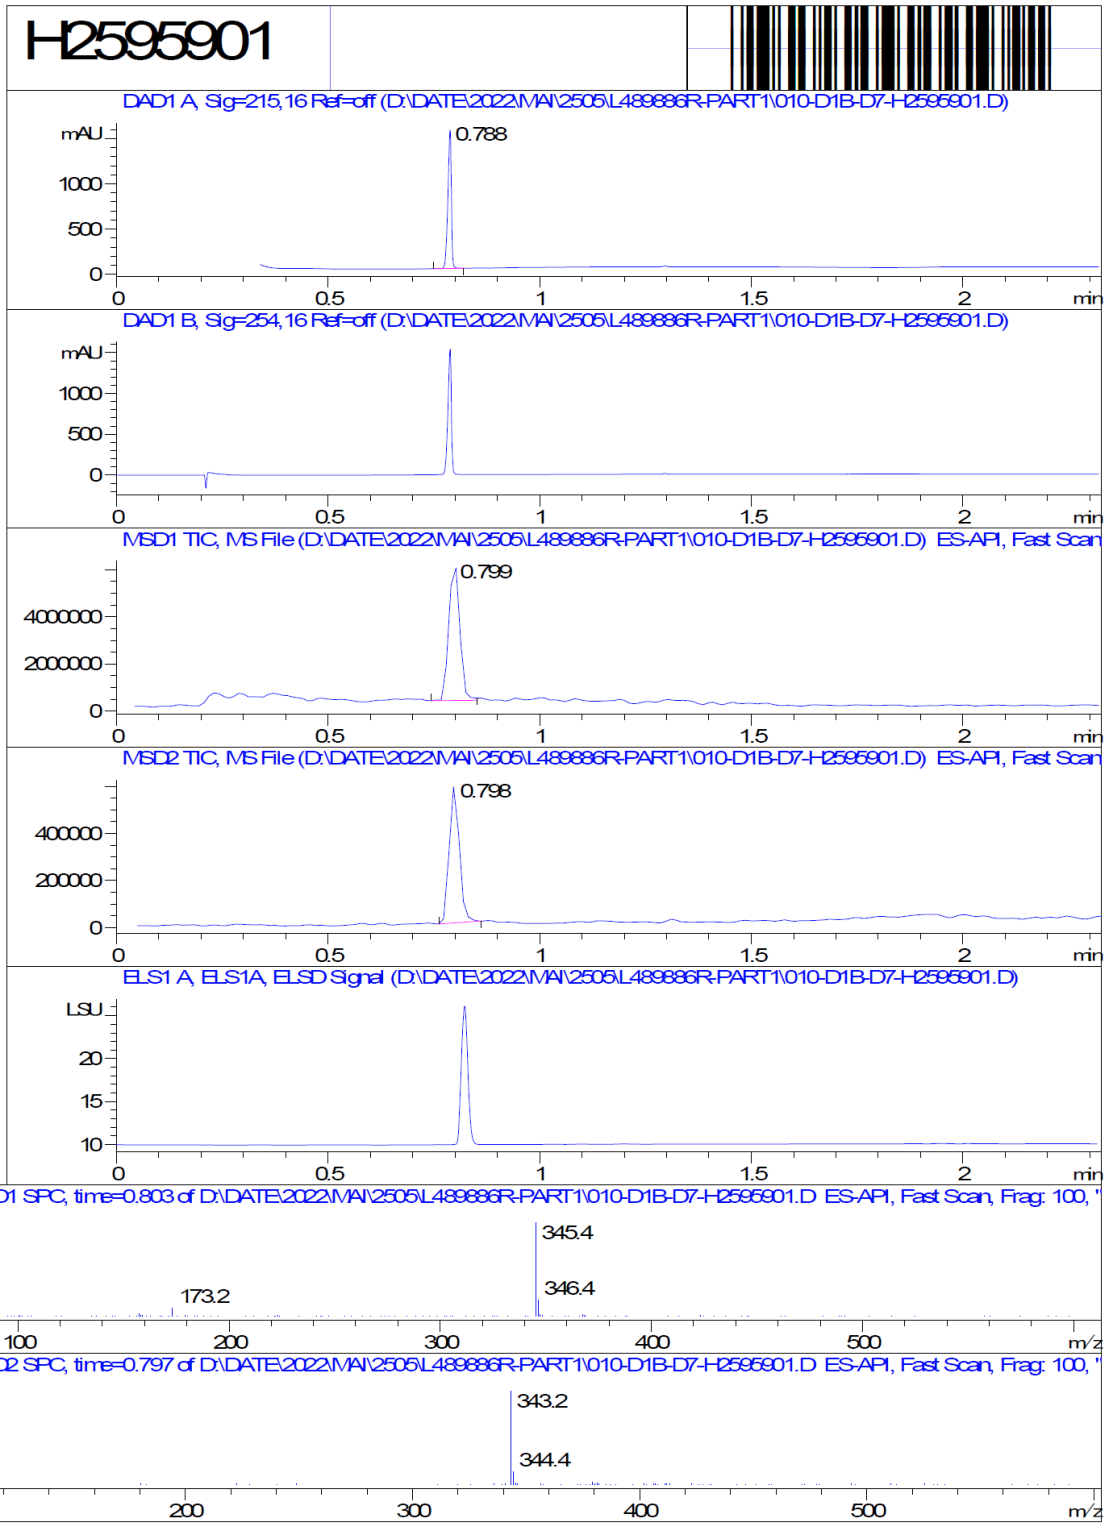

Z285889704

Z285889704

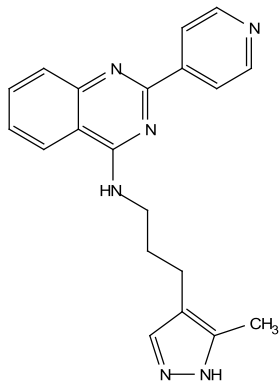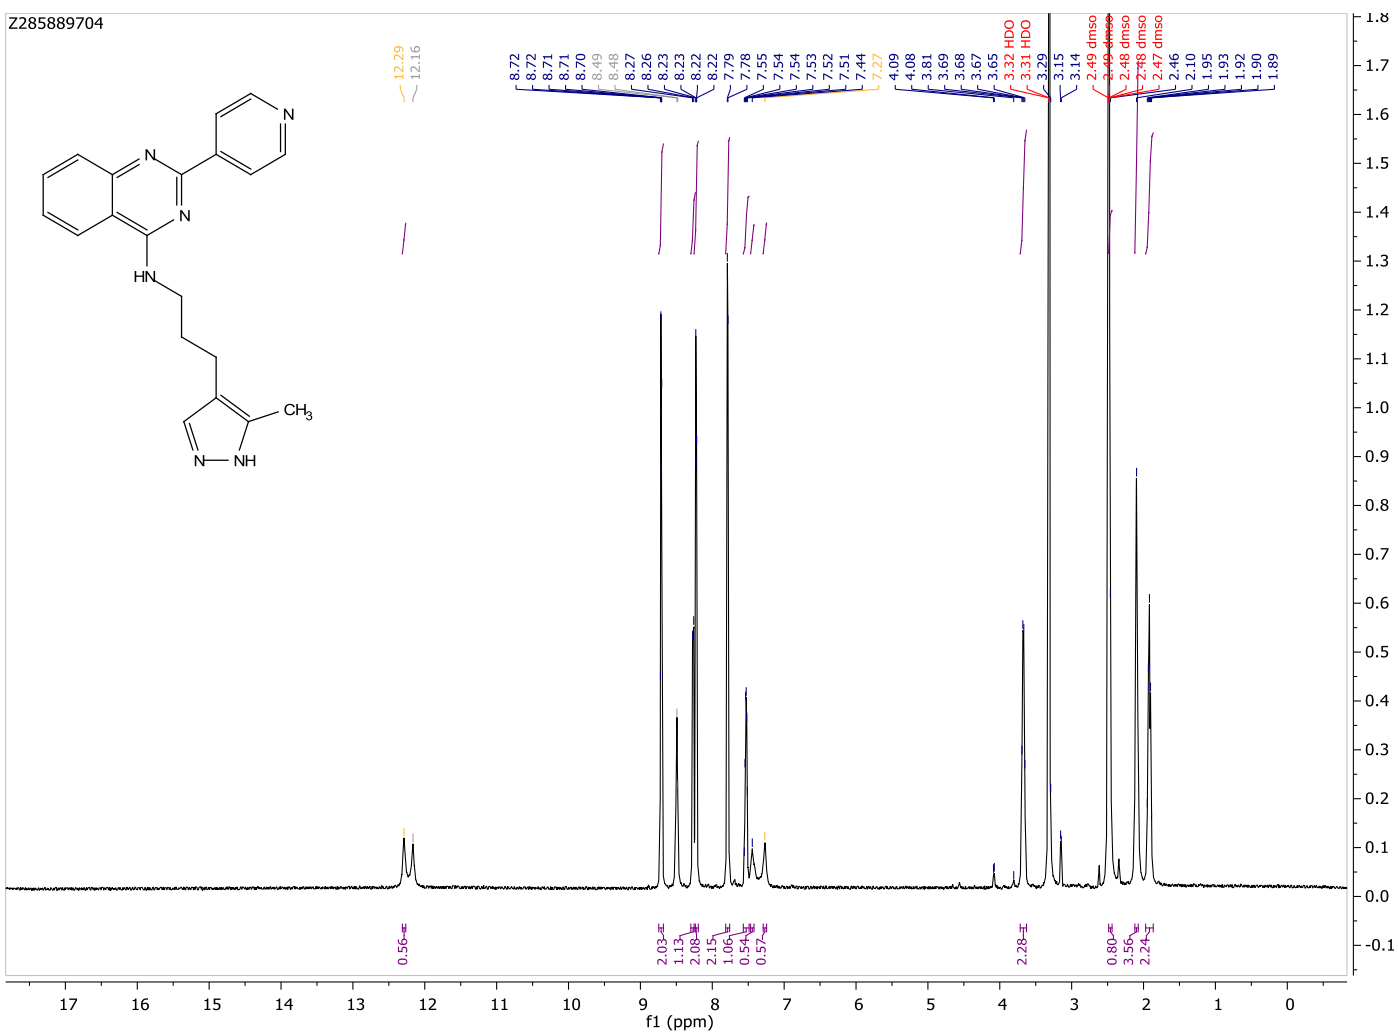

MaxPeak: 100.00%  
Ret\_Time: 1.274 min

# S231077\$7

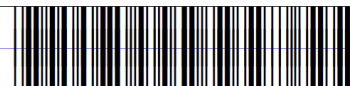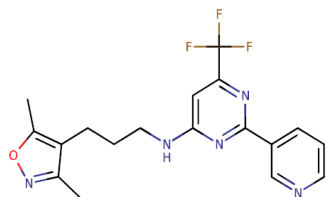

**Mol Wt** 377.36  
**Exact Mass** 377.17

| # | Time  | Area%  |
|---|-------|--------|
| 1 | 1.274 | 100.00 |

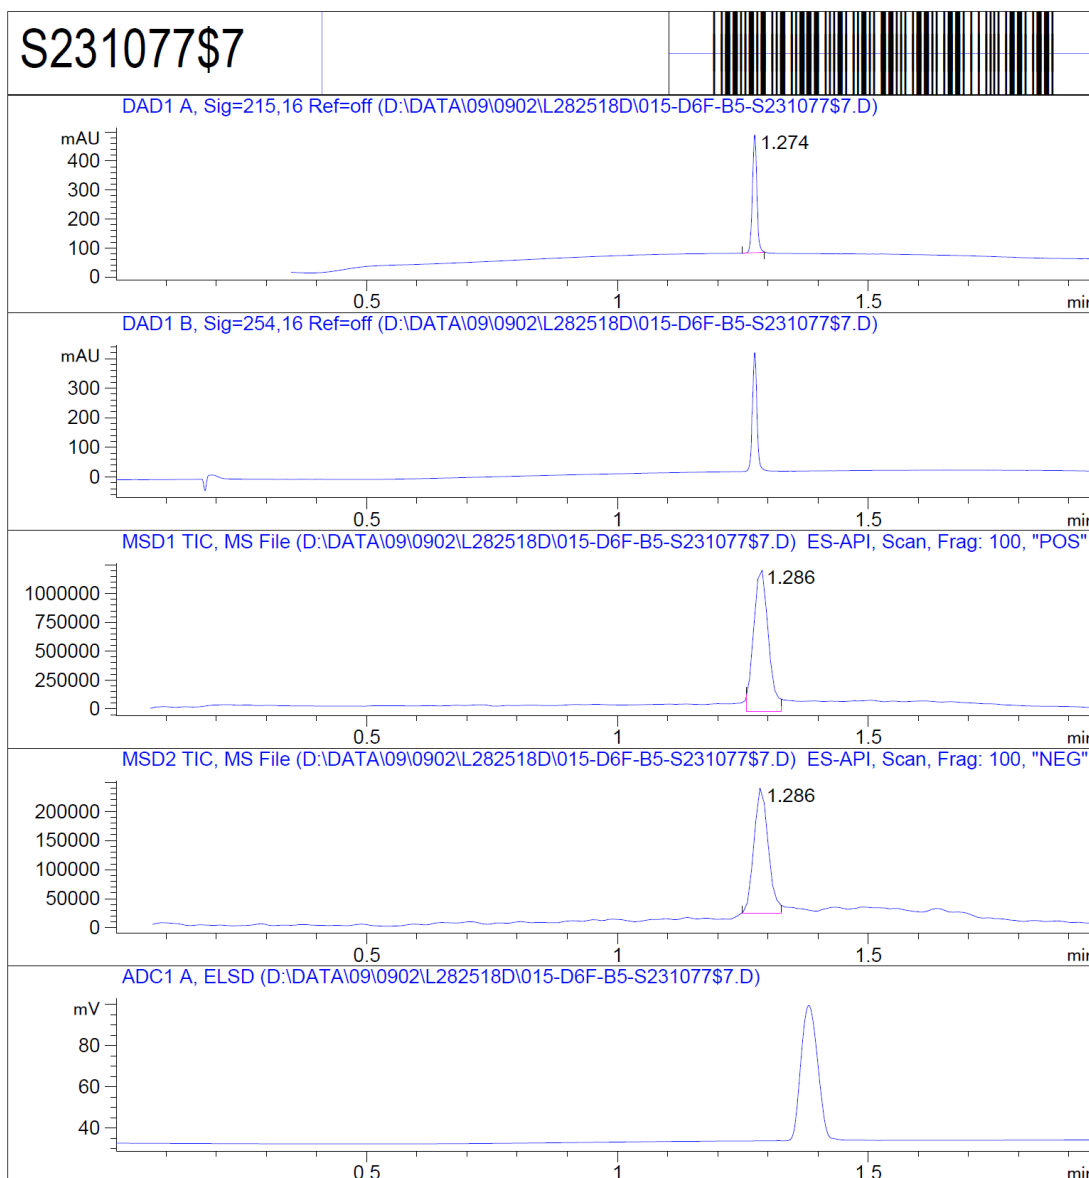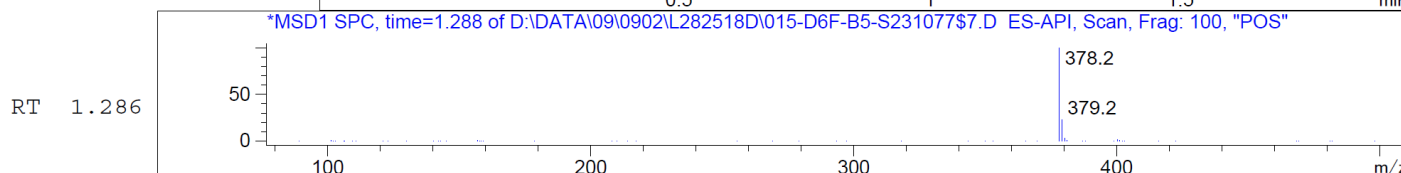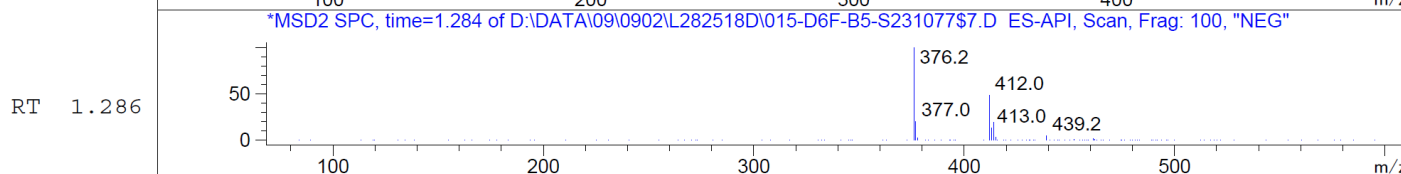

Z1378402602

Z1378402602

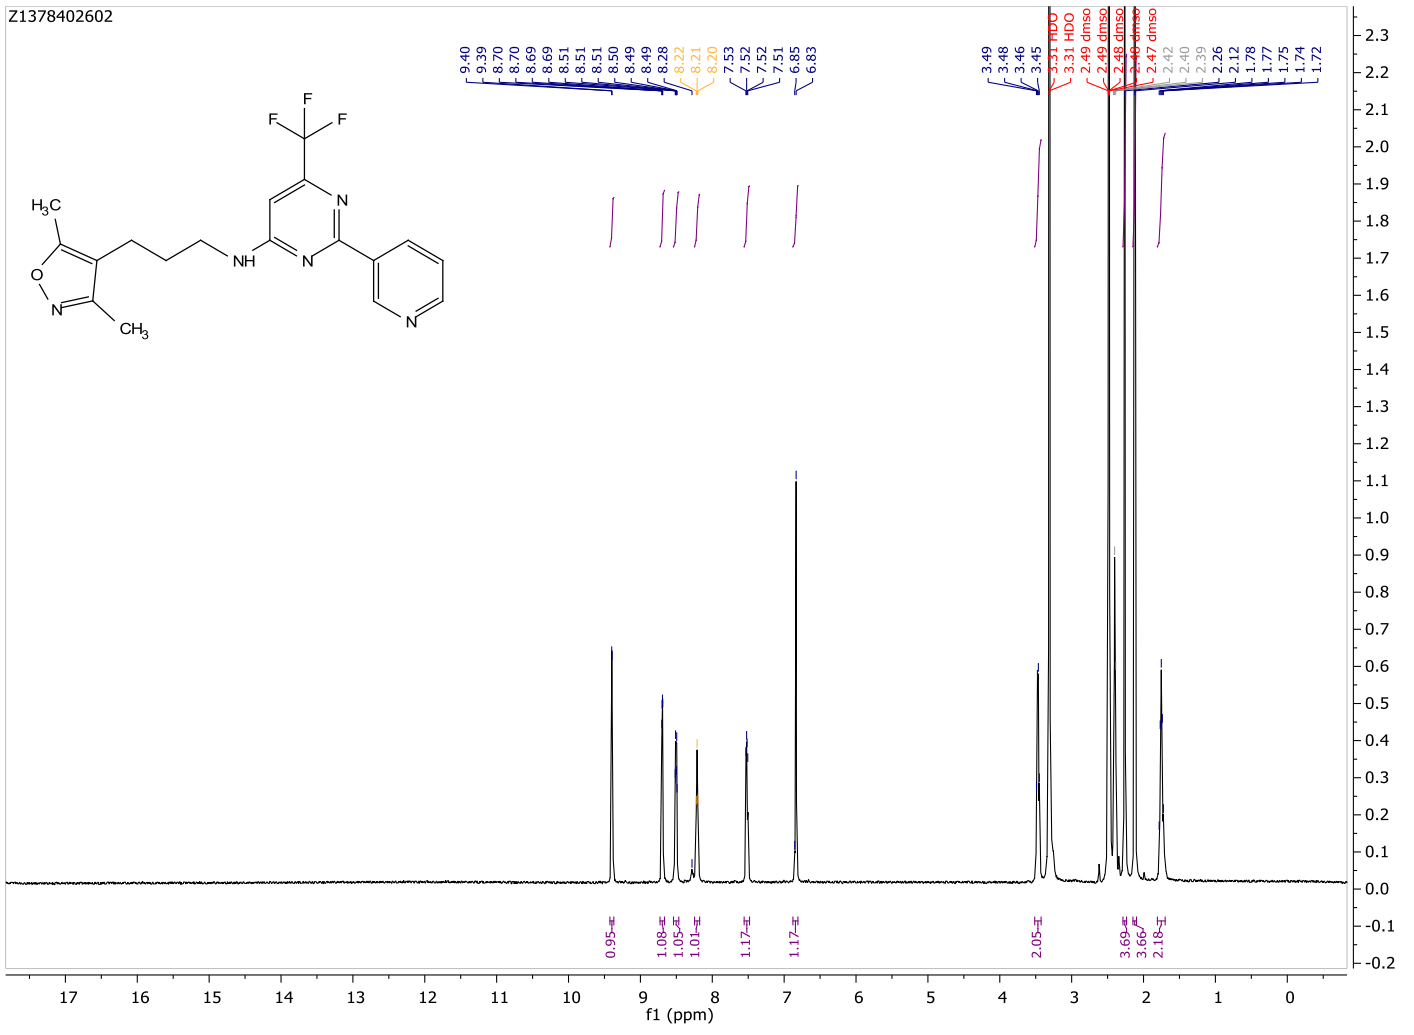



MaxPeak: 100.00%  
Ret\_Time: 0.863 min

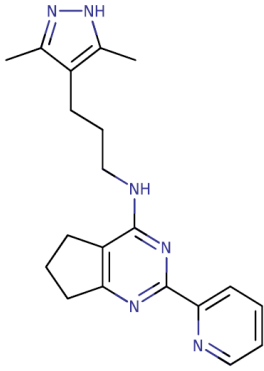

Mol Wt 348.44  
Exact Mass 348.24

| # | Time  | Area%  |
|---|-------|--------|
| 1 | 0.863 | 100.00 |

S231074\$6

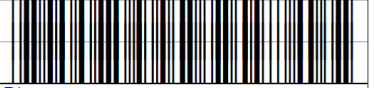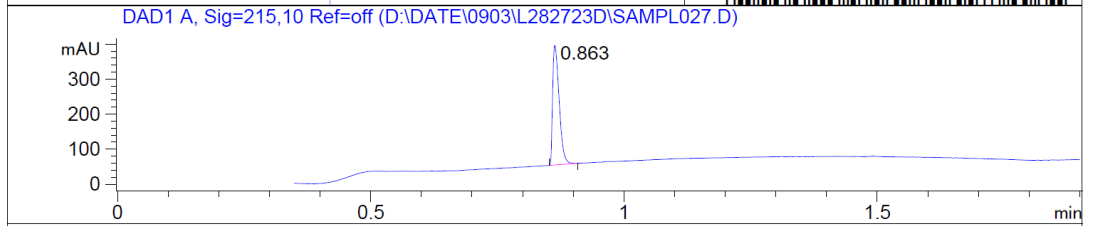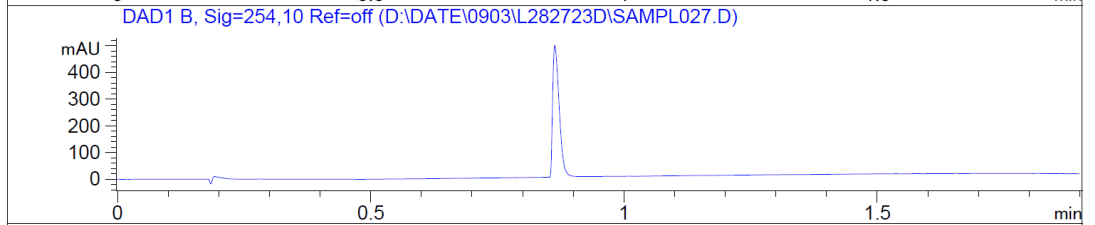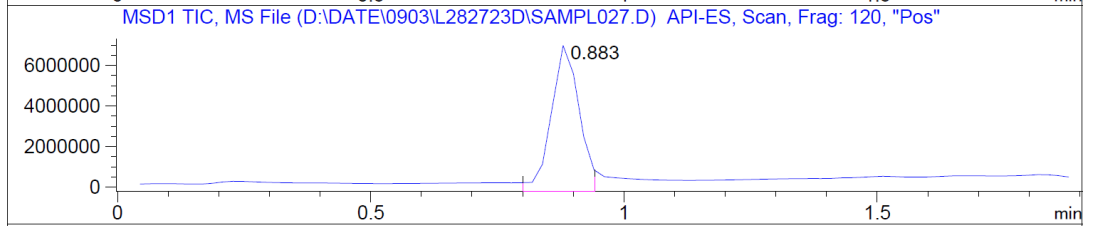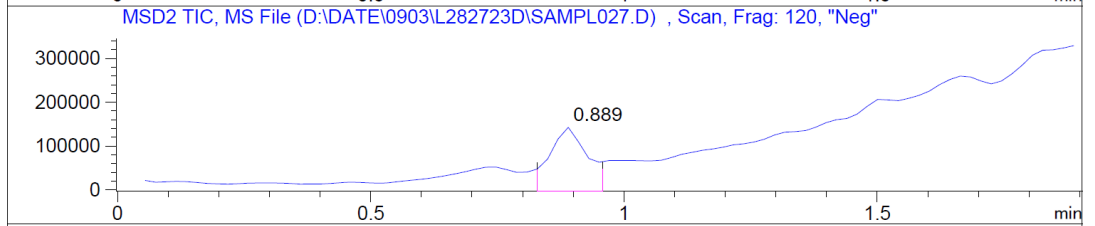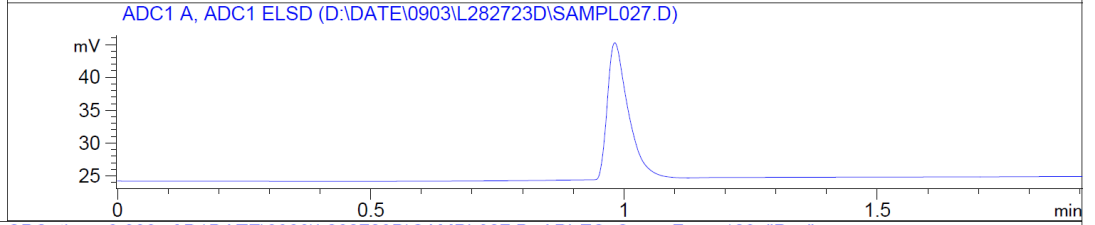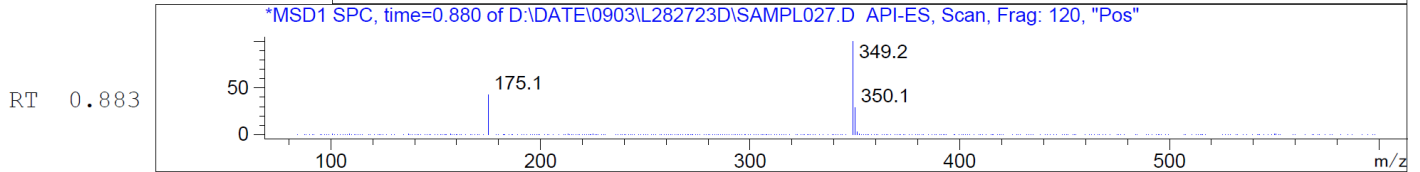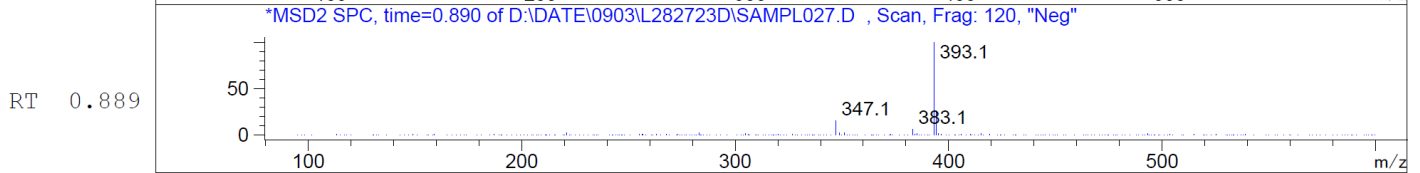

Z4576452292

Z4576452292

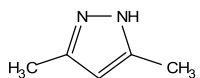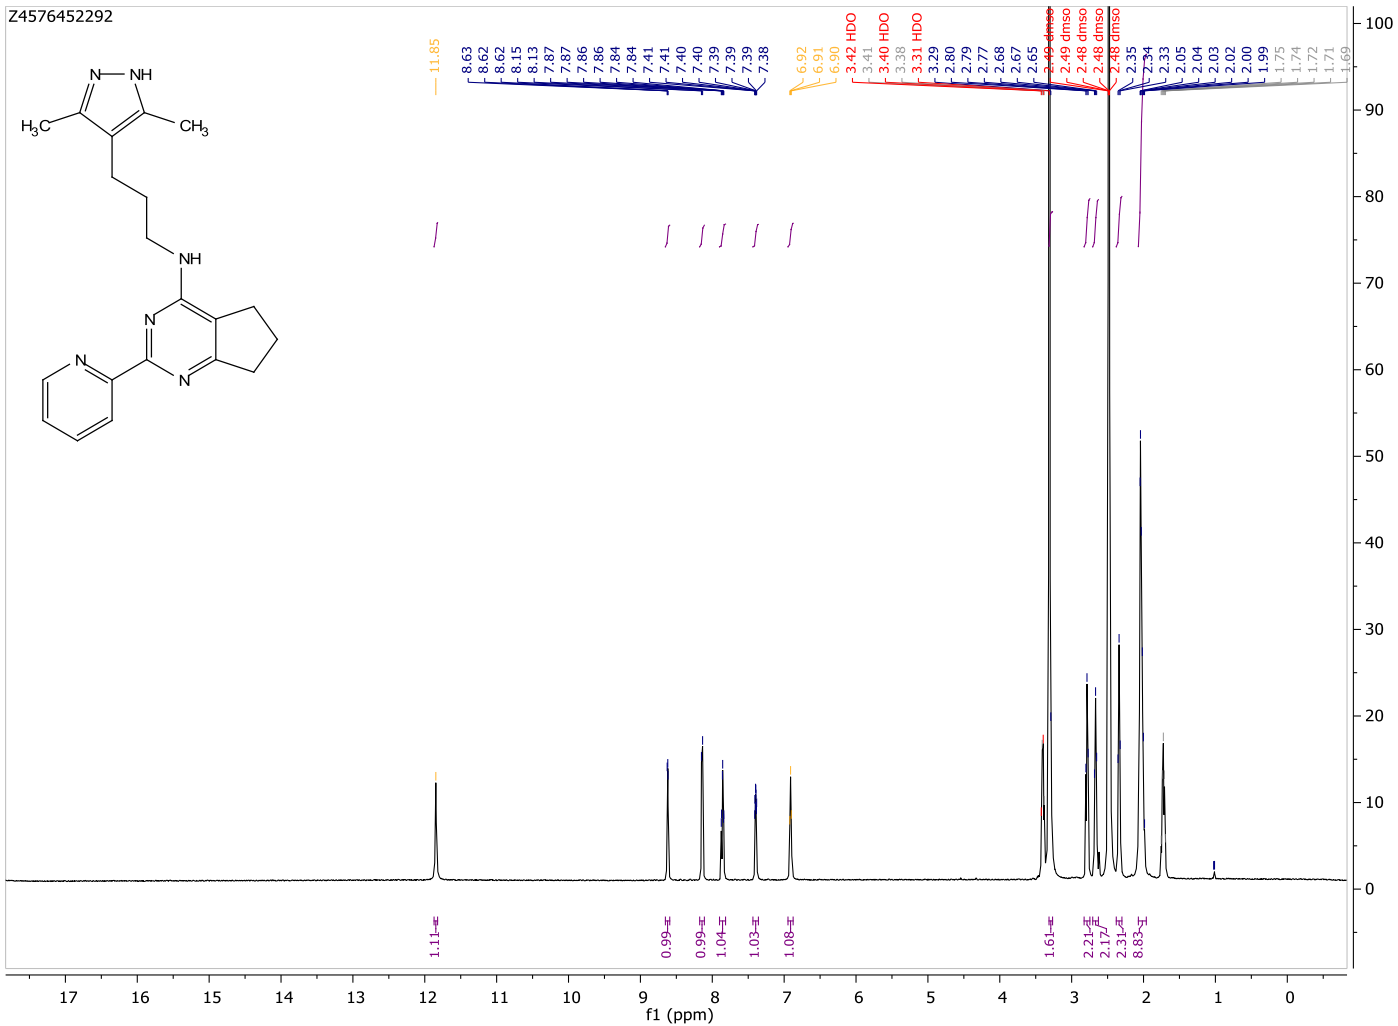

MaxPeak: 100.00%  
Ret\_Time: 1.128 min

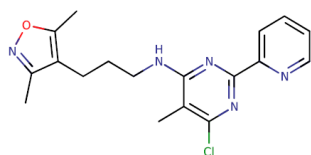

Mol Wt 357.84  
Exact Mass 357.16

| # | Time  | Area%  |
|---|-------|--------|
| 1 | 1.128 | 100.00 |

# S238059\$1

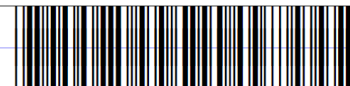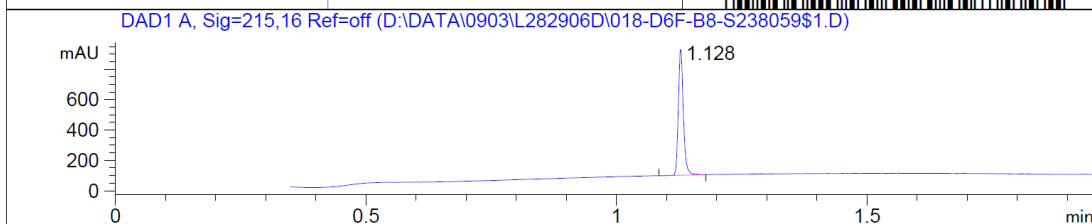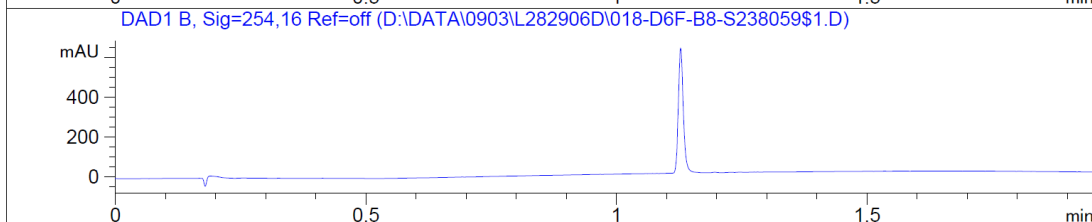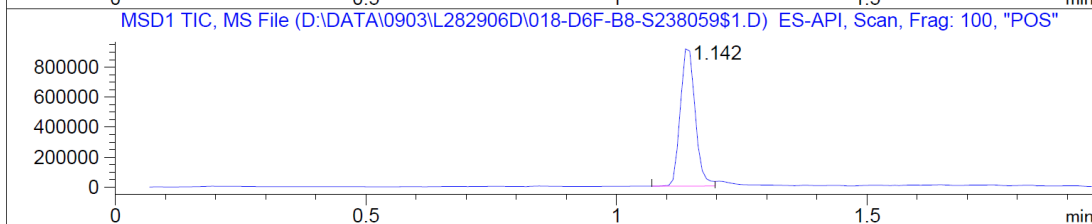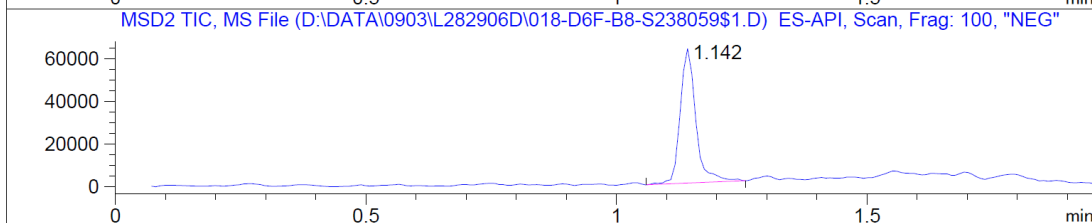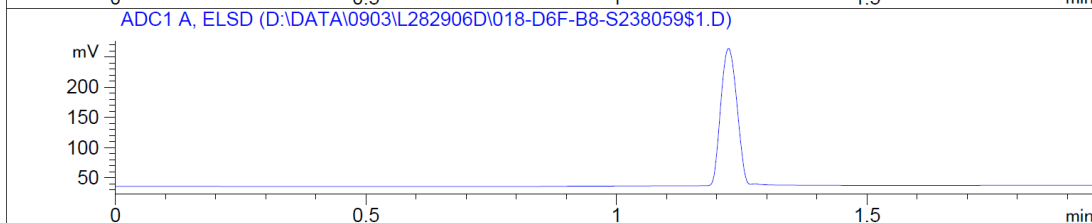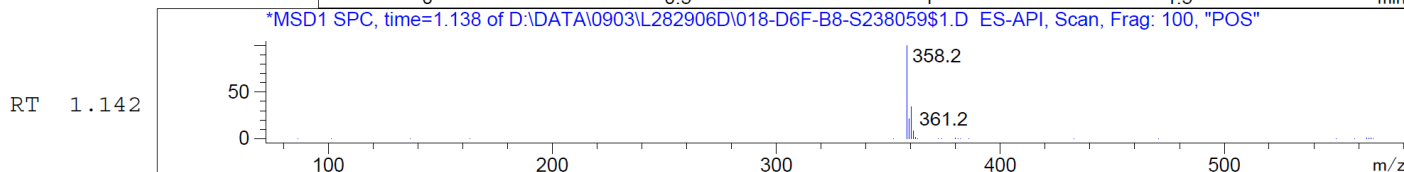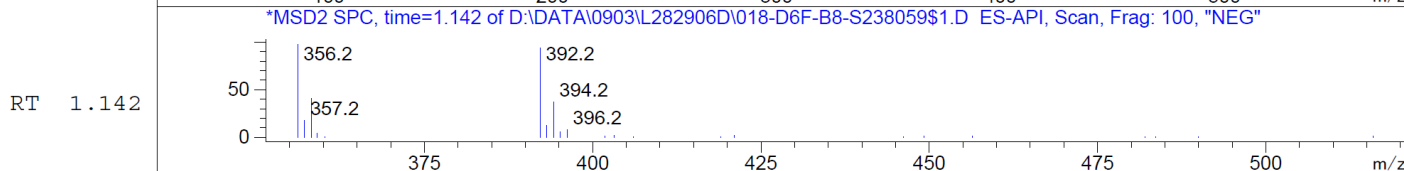

Z4607408926

Z4607408926

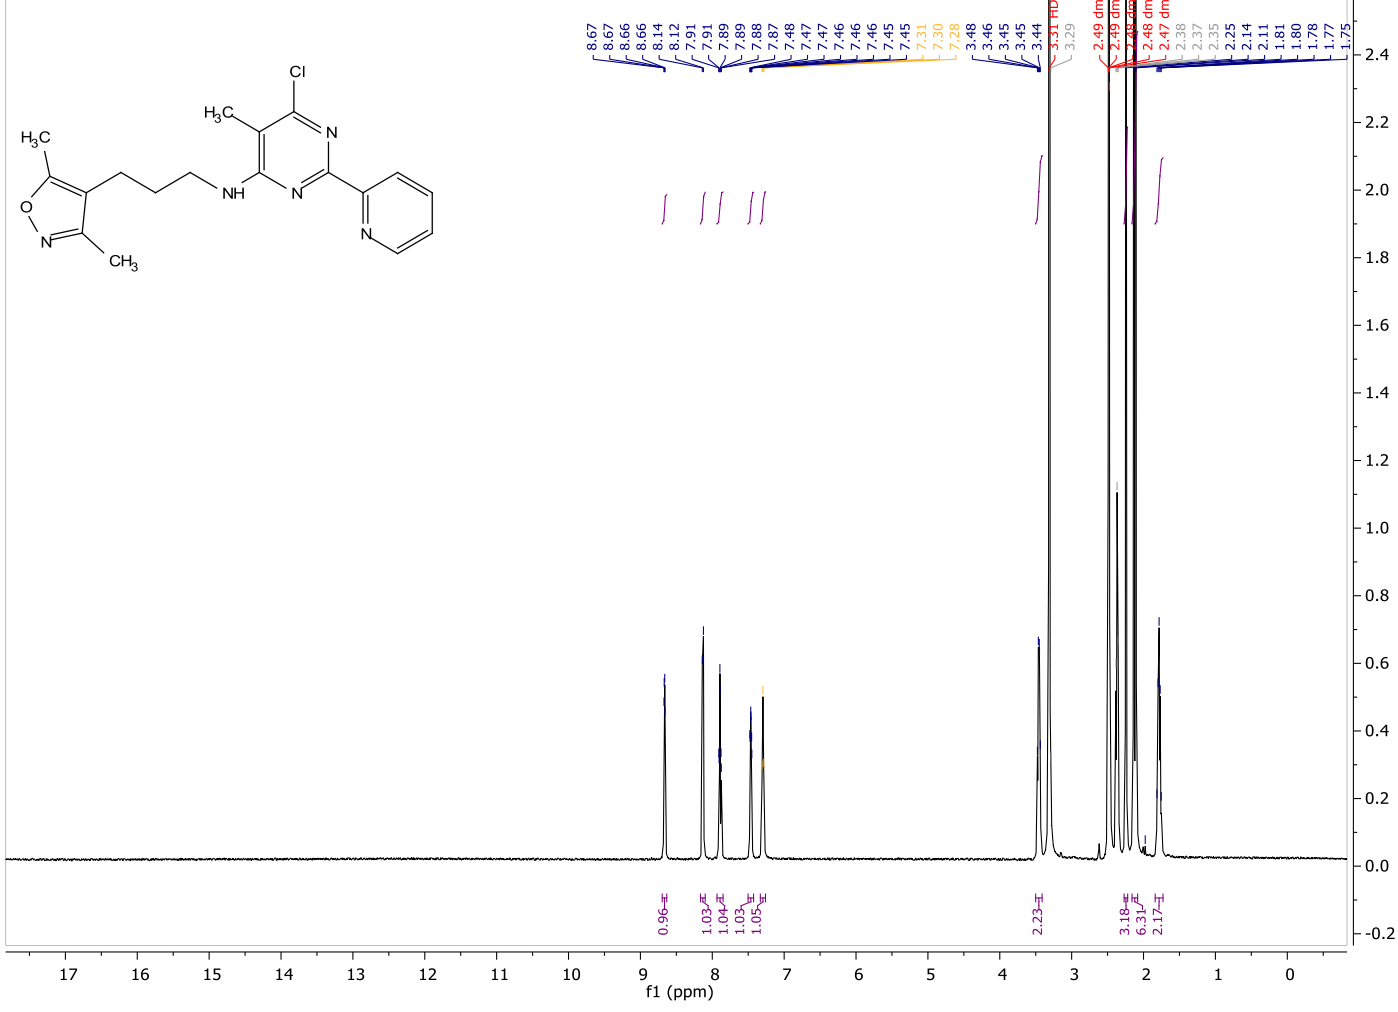

# S568076\$2

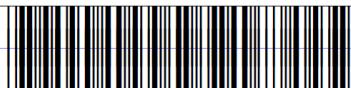

MaxPeak: 91.57%  
Ret\_Time: 1.147 min

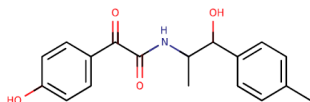

**Mol Wt** 313.35  
**Exact Mass** 313.15

| # | Time  | Area% |
|---|-------|-------|
| 1 | 1.124 | 7.28  |
| 2 | 1.147 | 91.57 |
| 3 | 1.285 | 1.15  |

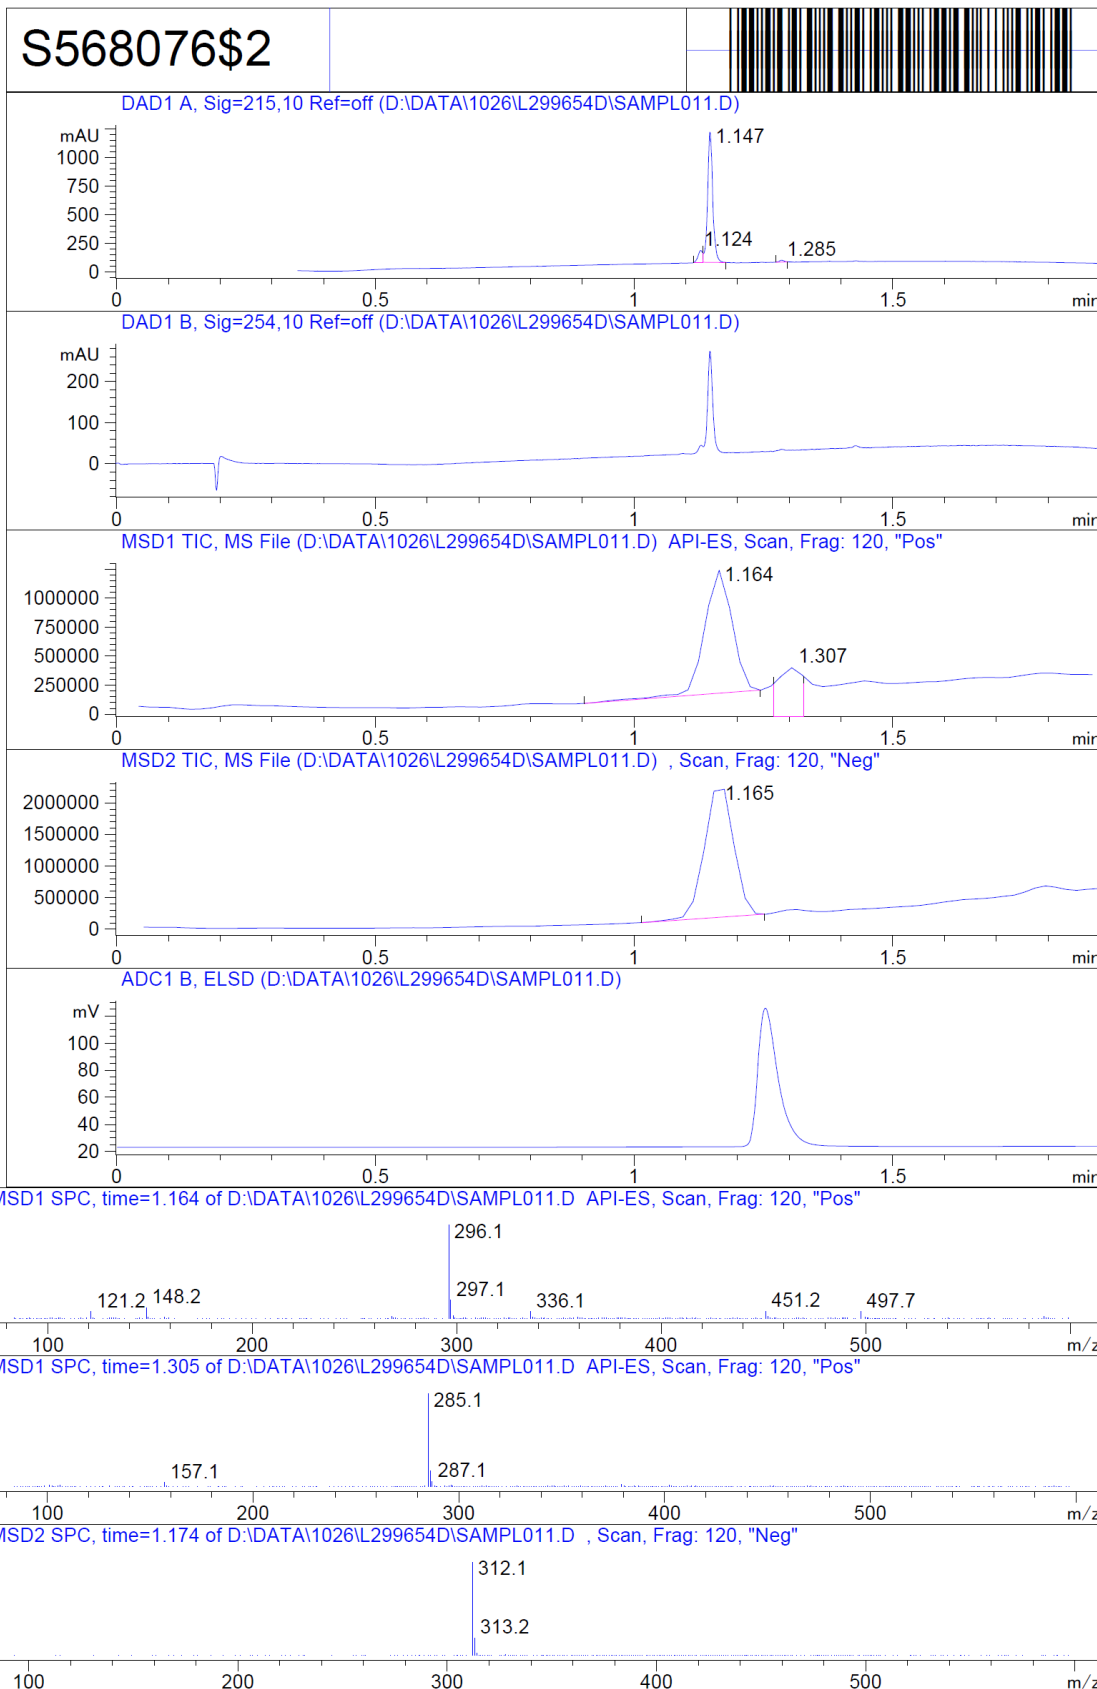

Z2091253662\_(6634\_3)

Z2091253662\_(6634\_3)

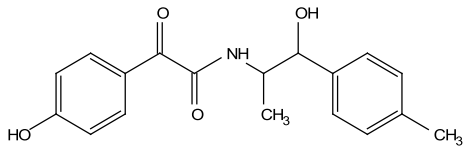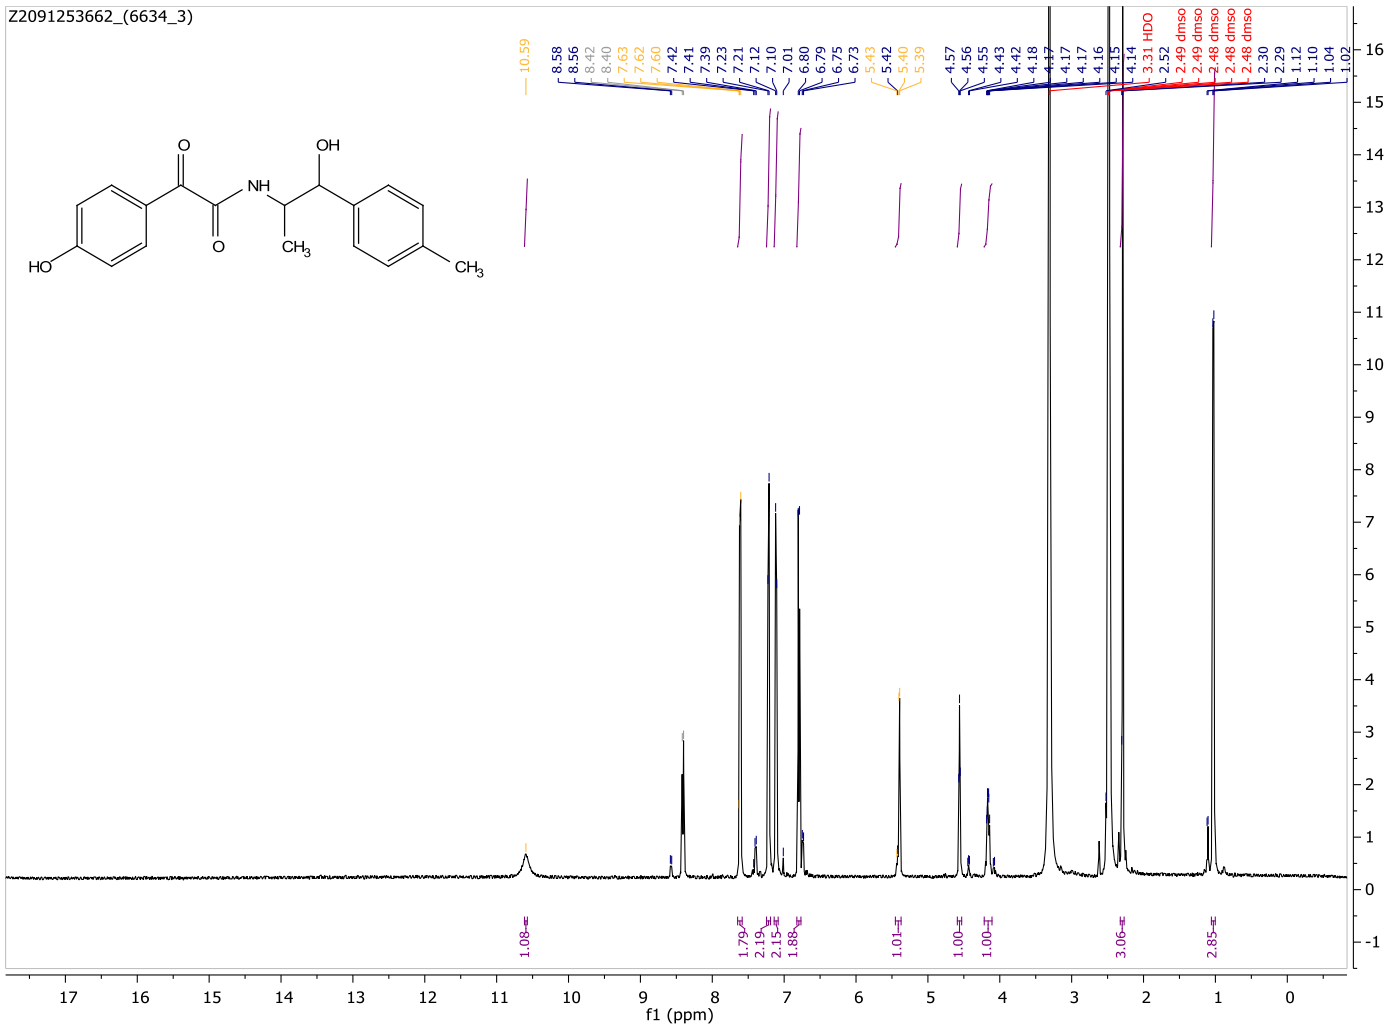

MaxPeak: 98.42%  
Ret\_Time: 1.286 min

# S919151\$5

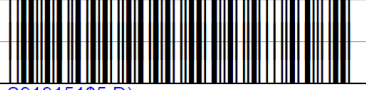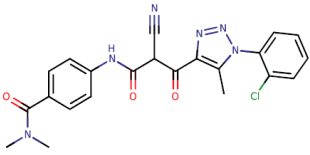

**Mol Wt** 450.88  
**Exact Mass** 450.13

| # | Time  | Area% |
|---|-------|-------|
| 1 | 0.808 | 1.58  |
| 2 | 1.286 | 98.42 |

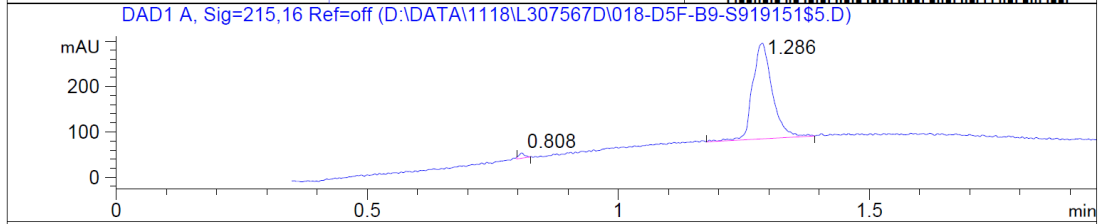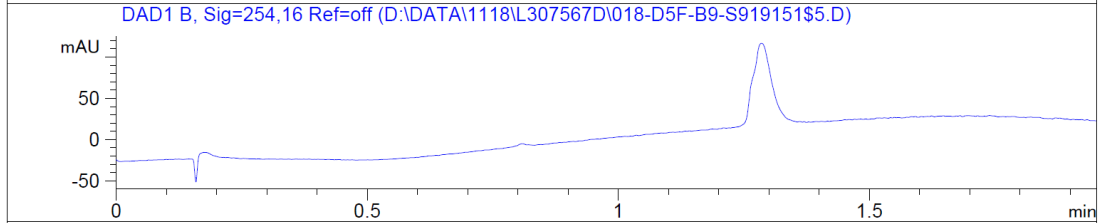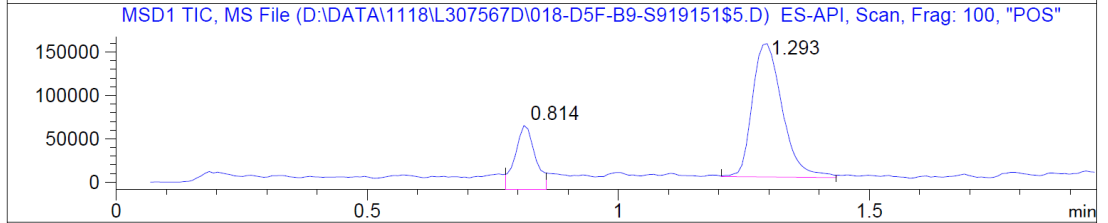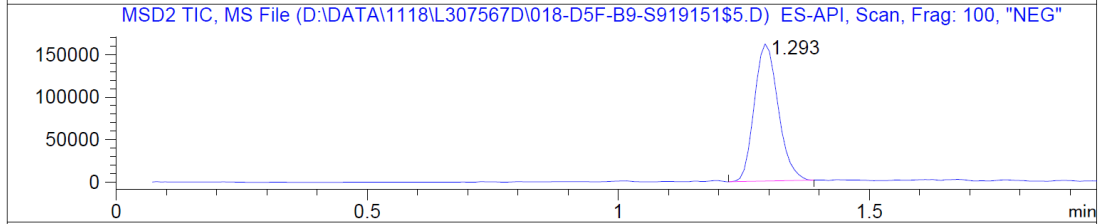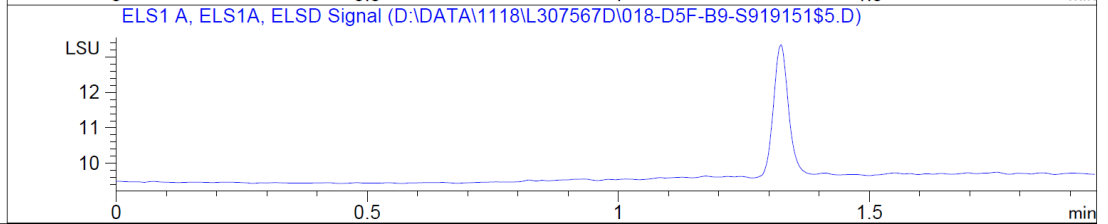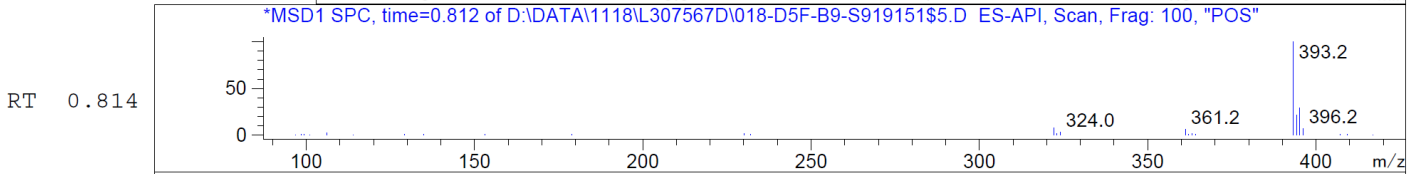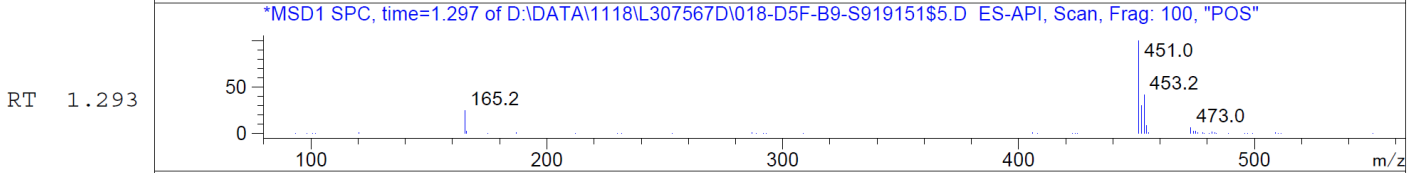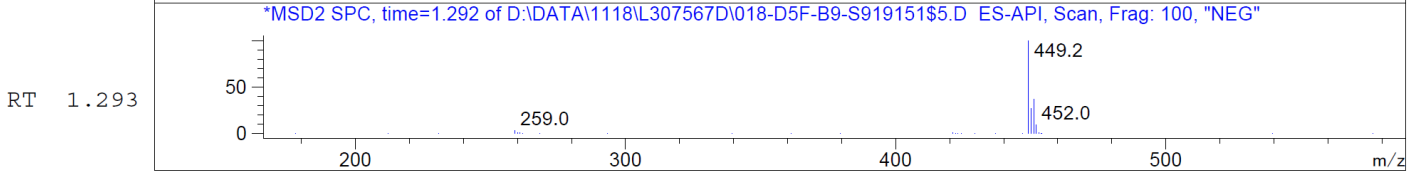

Z1123377193\_(6792\_6)

Z1123377193\_(6792\_6)

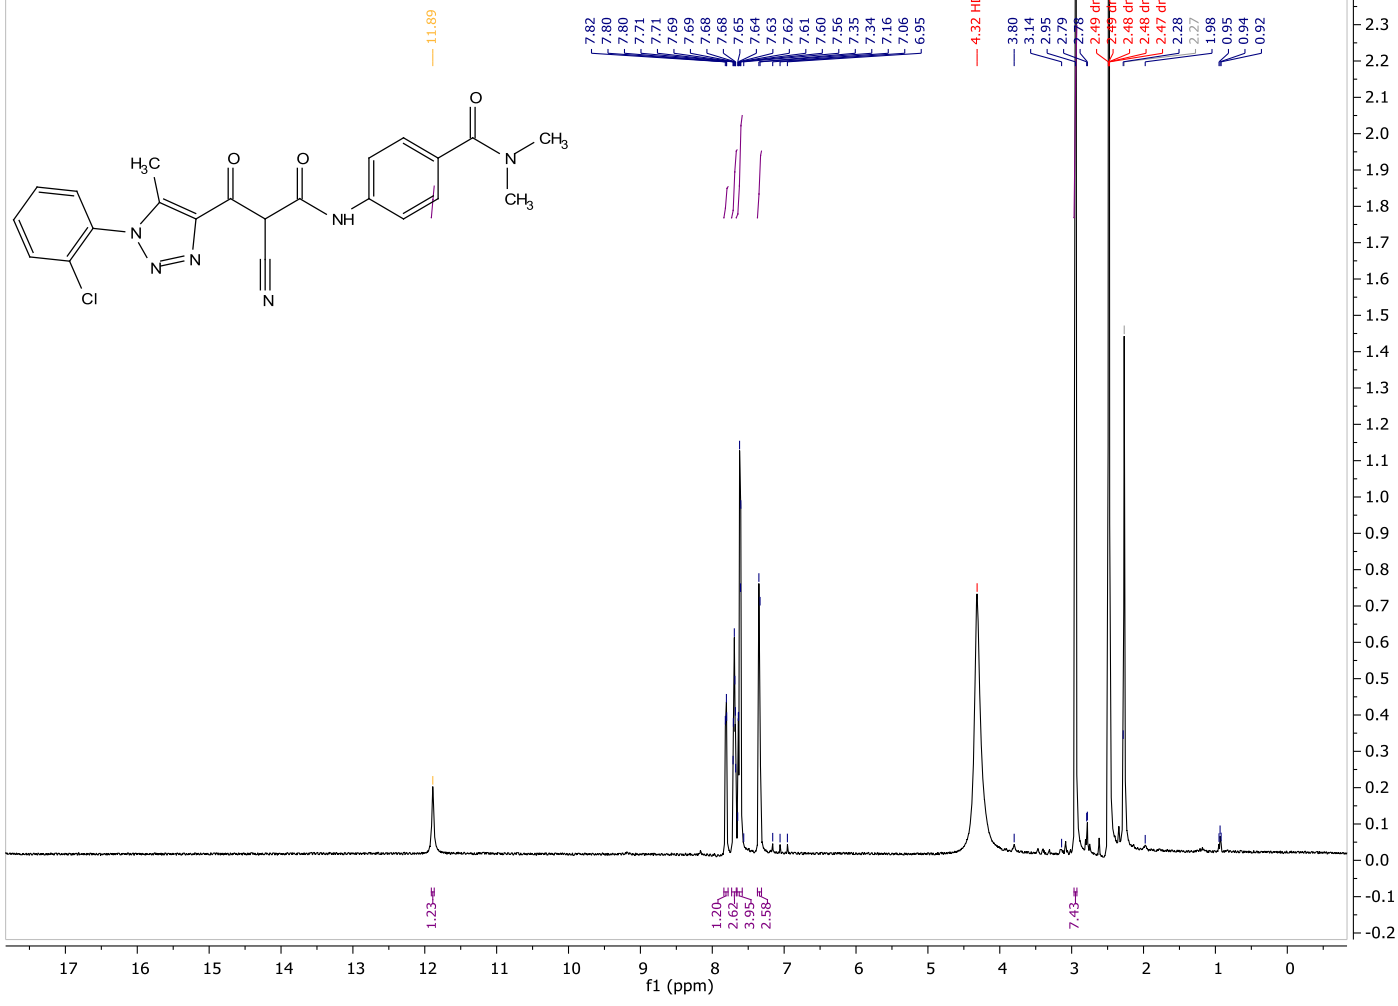



# S910024\$A

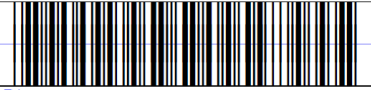

MaxPeak: 100.00%  
Ret\_Time: 1.281 min

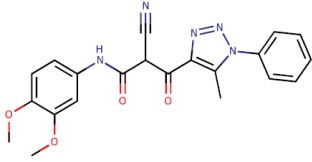

**Mol Wt** 405.41  
**Exact Mass** 405.15

| # | Time  | Area%  |
|---|-------|--------|
| 1 | 1.281 | 100.00 |

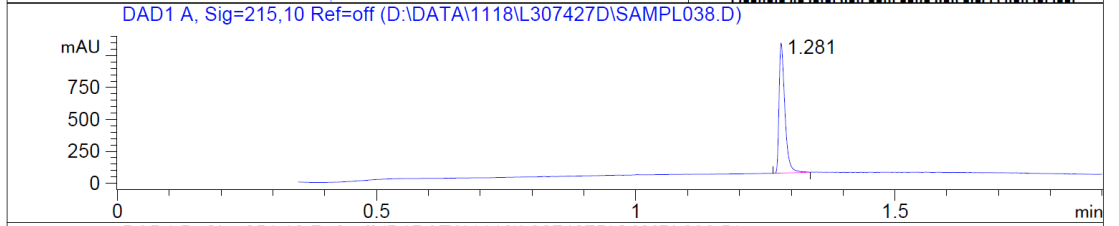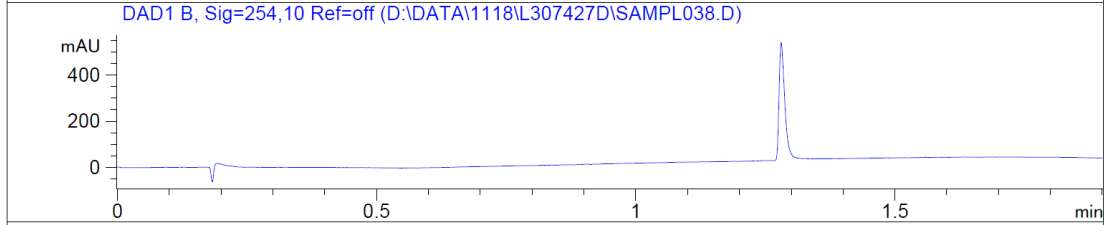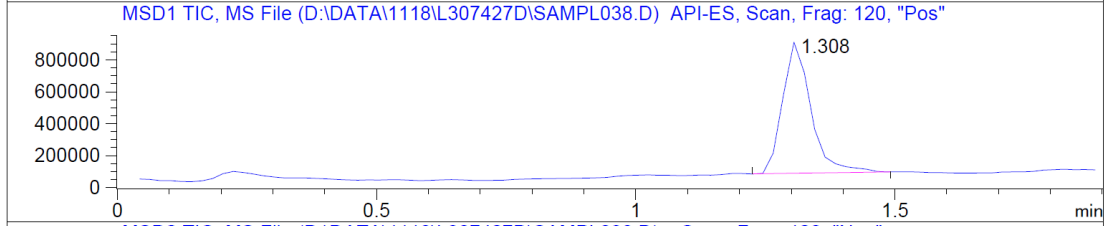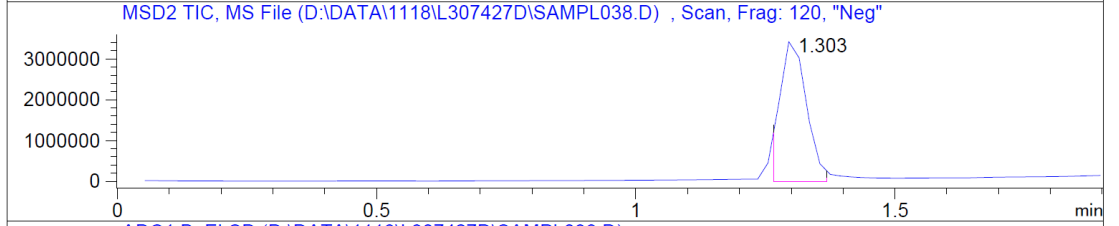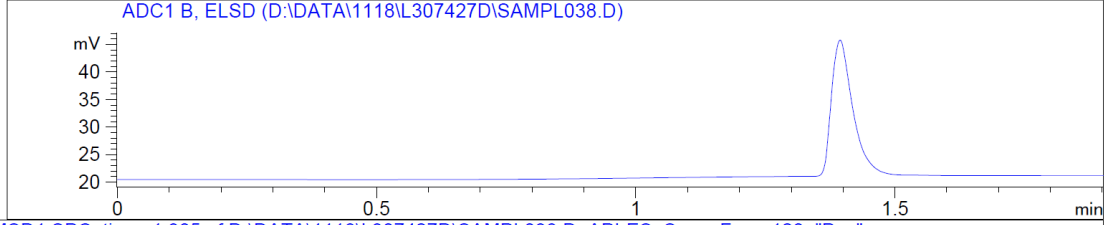

RT 1.308

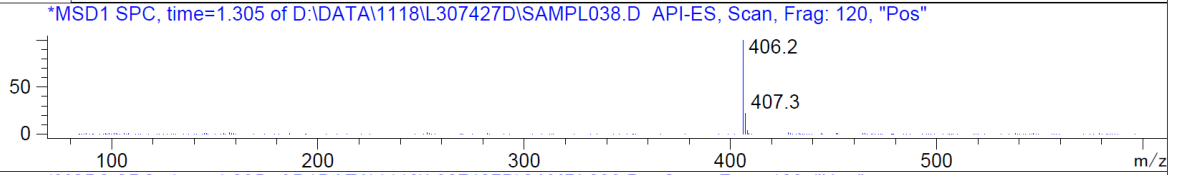

RT 1.303

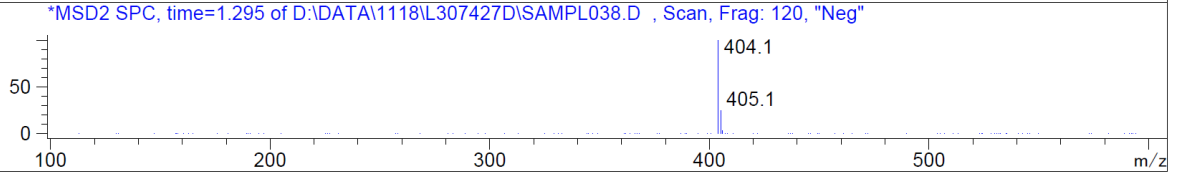

Z762211478\_(6792\_5)

Z762211478\_(6792\_5)

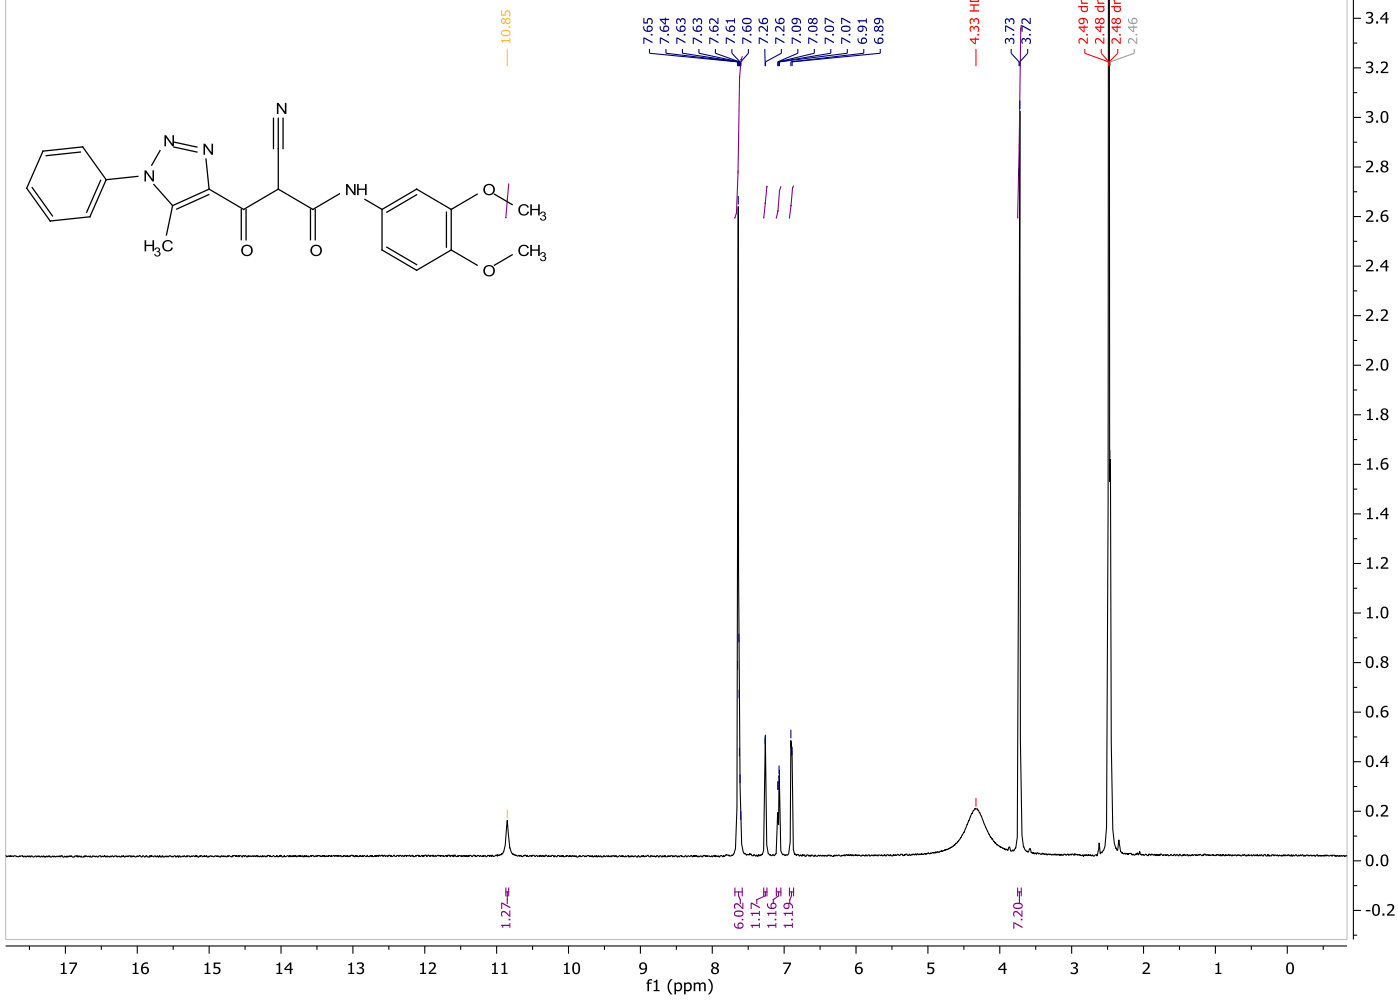

MaxPeak: 98.46%  
Ret\_Time: 1.428 min

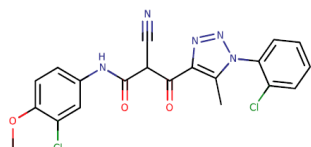

Mol Wt 444.27  
Exact Mass 443.06

| # | Time  | Area% |
|---|-------|-------|
| 1 | 1.041 | 1.54  |
| 2 | 1.428 | 98.46 |

S917050\$B

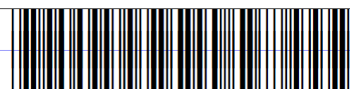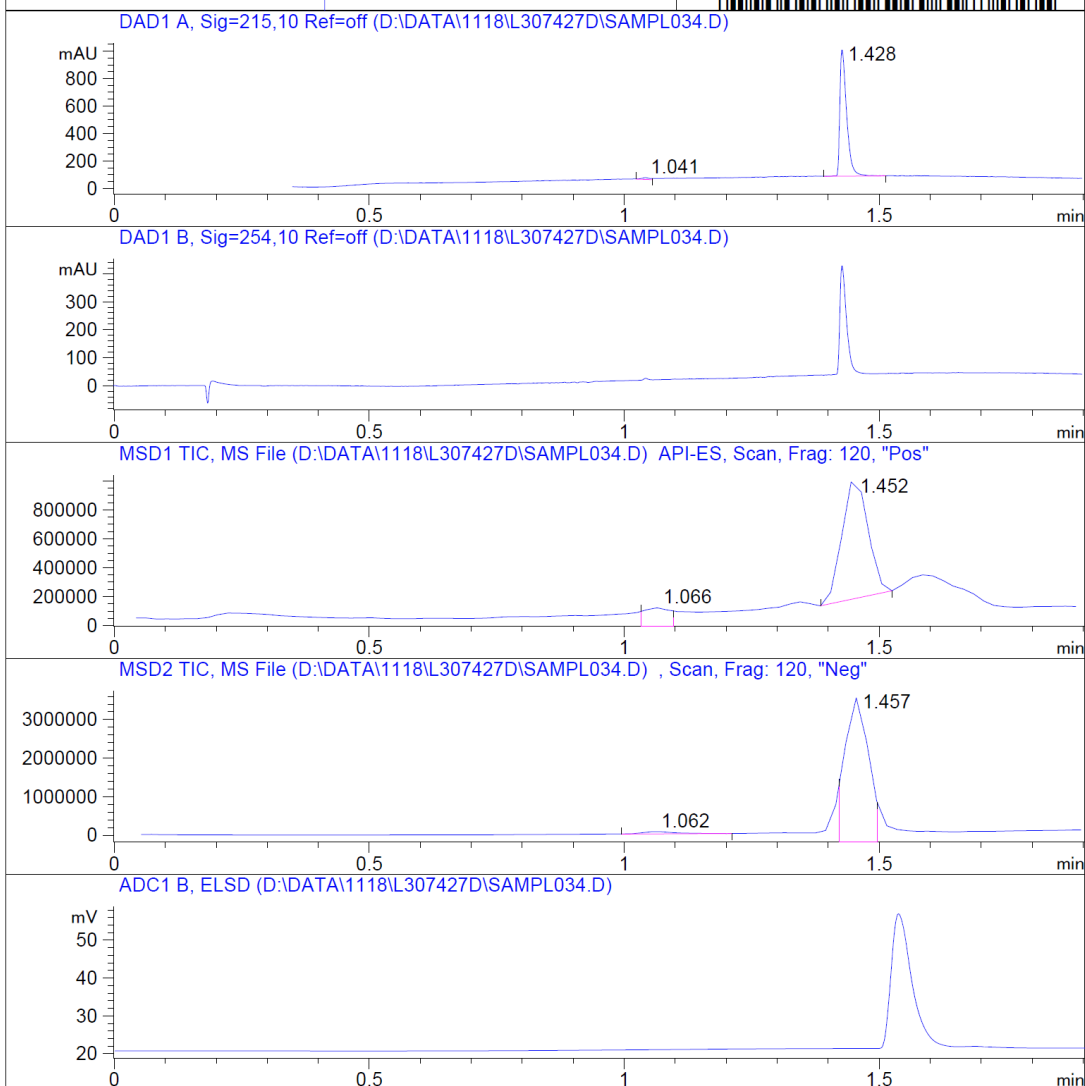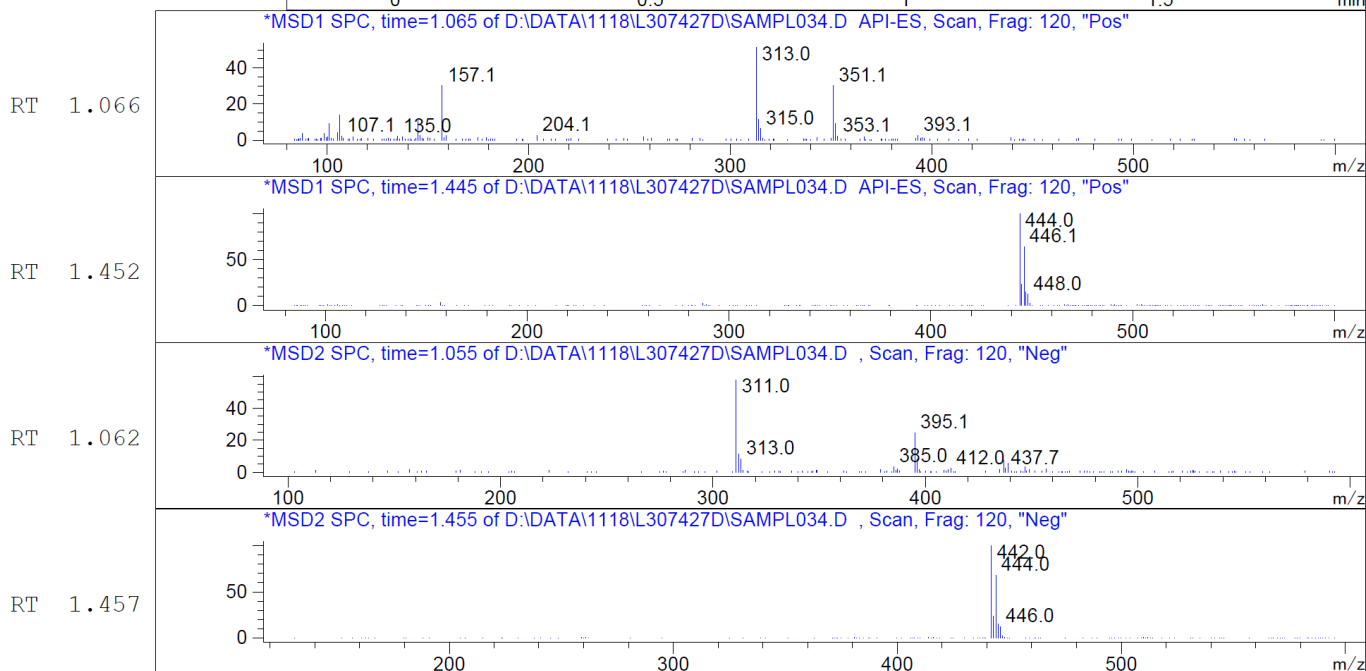

Z1123371957\_(6792\_3)

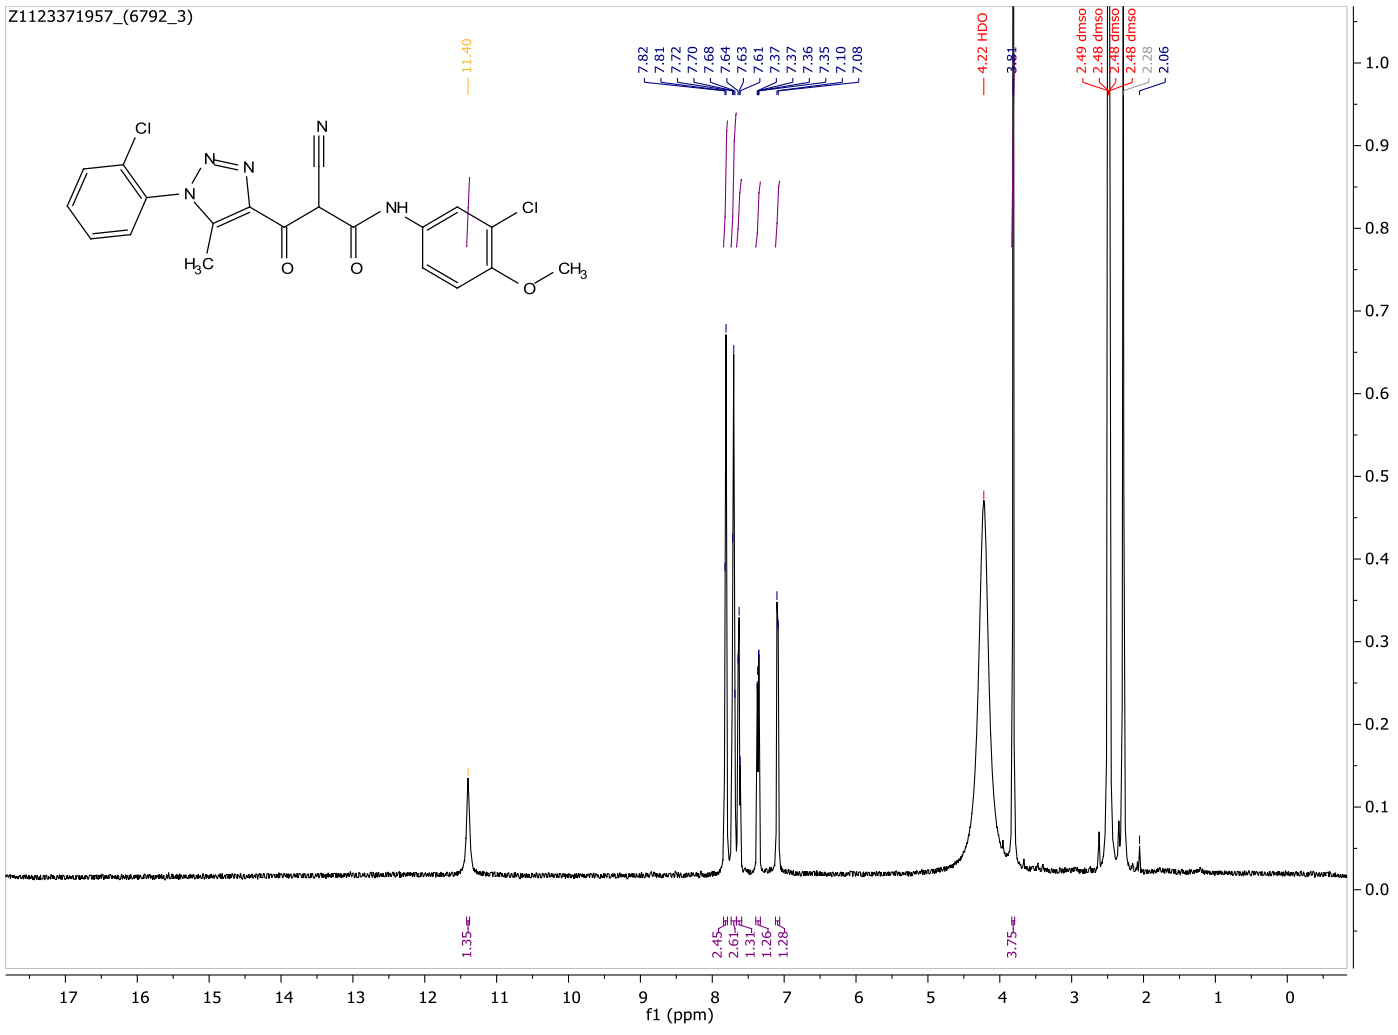

MaxPeak: 100.00%  
Ret\_Time: 1.448 min

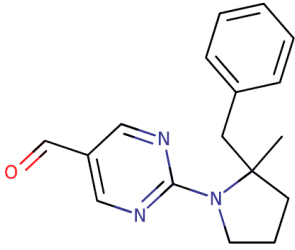

Mol Wt 281.35  
Exact Mass 281.18

| # | Time  | Area%  |
|---|-------|--------|
| 1 | 1.448 | 100.00 |

# S993110\$1

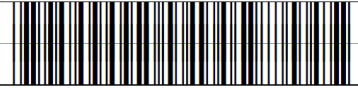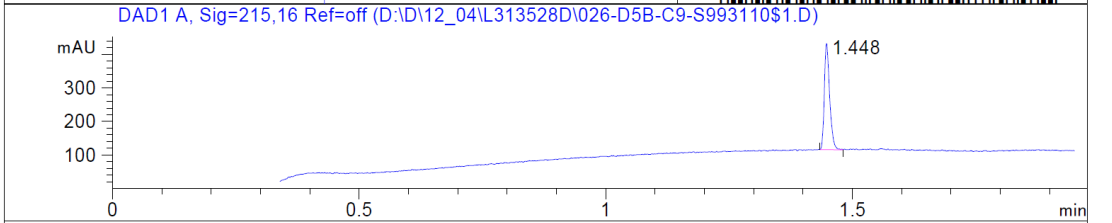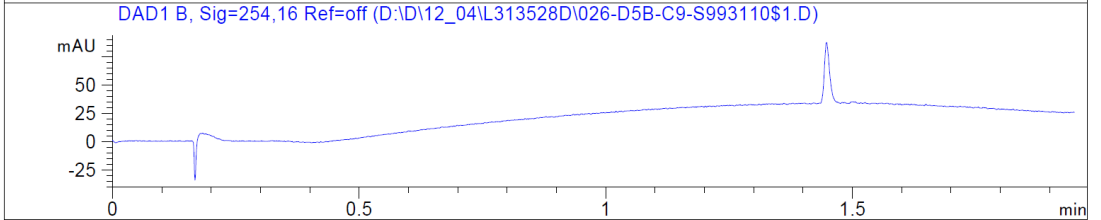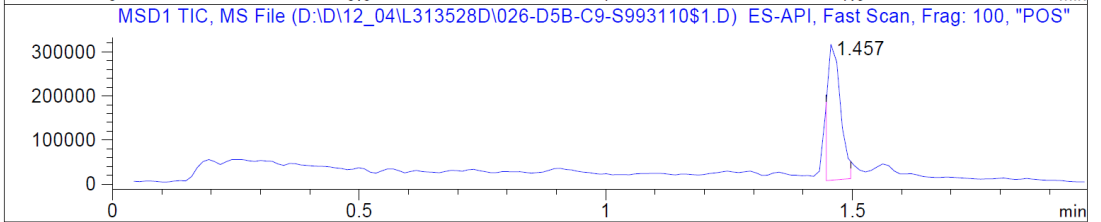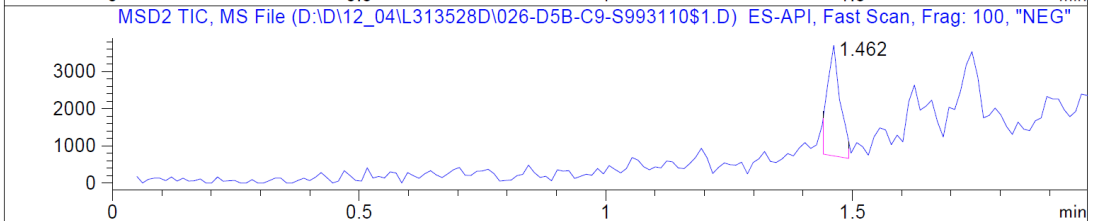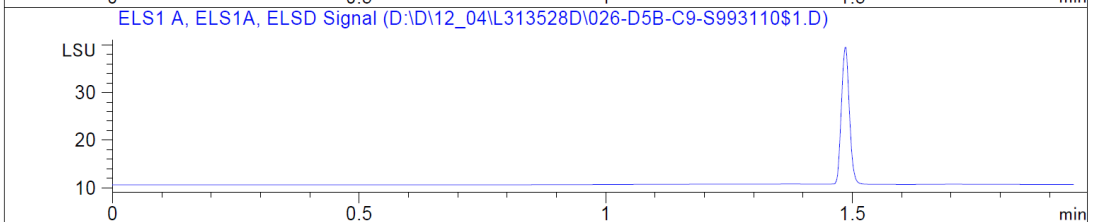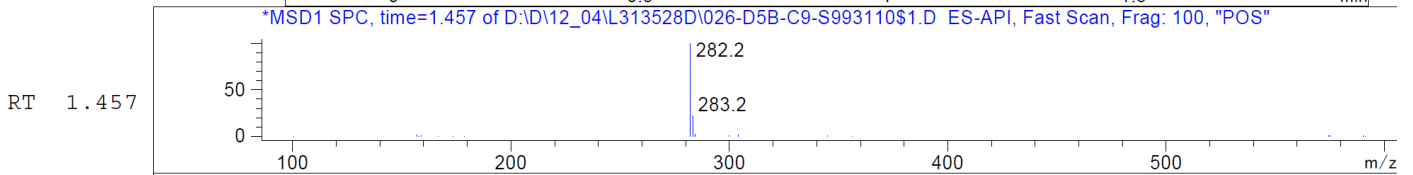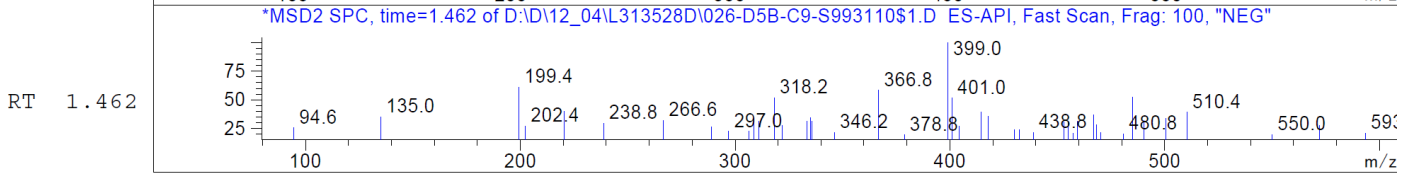

Z2851084476\_(ZINC882196186)

Z2851084476\_(ZINC882196186)

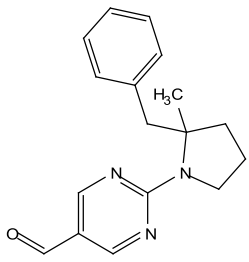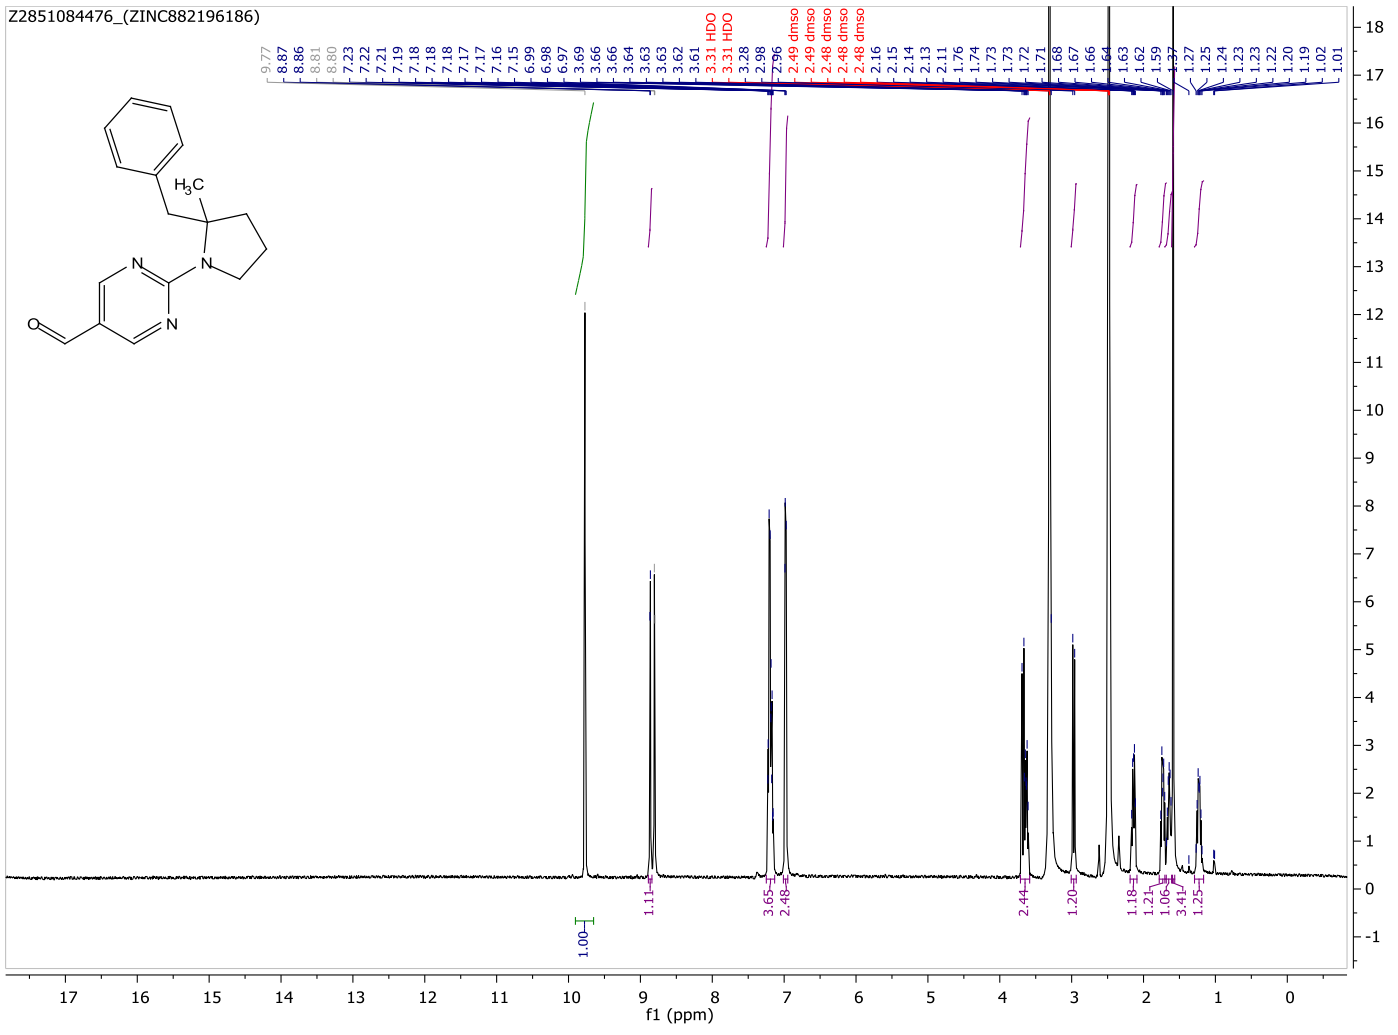

# S993119\$1

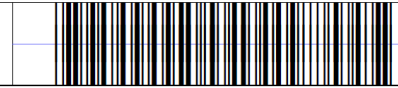

MaxPeak: 100.00%  
Ret\_Time: 1.308 min

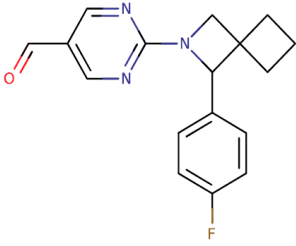

**Mol Wt** 297.33  
**Exact Mass** 297.15

| # | Time  | Area%  |
|---|-------|--------|
| 1 | 1.308 | 100.00 |

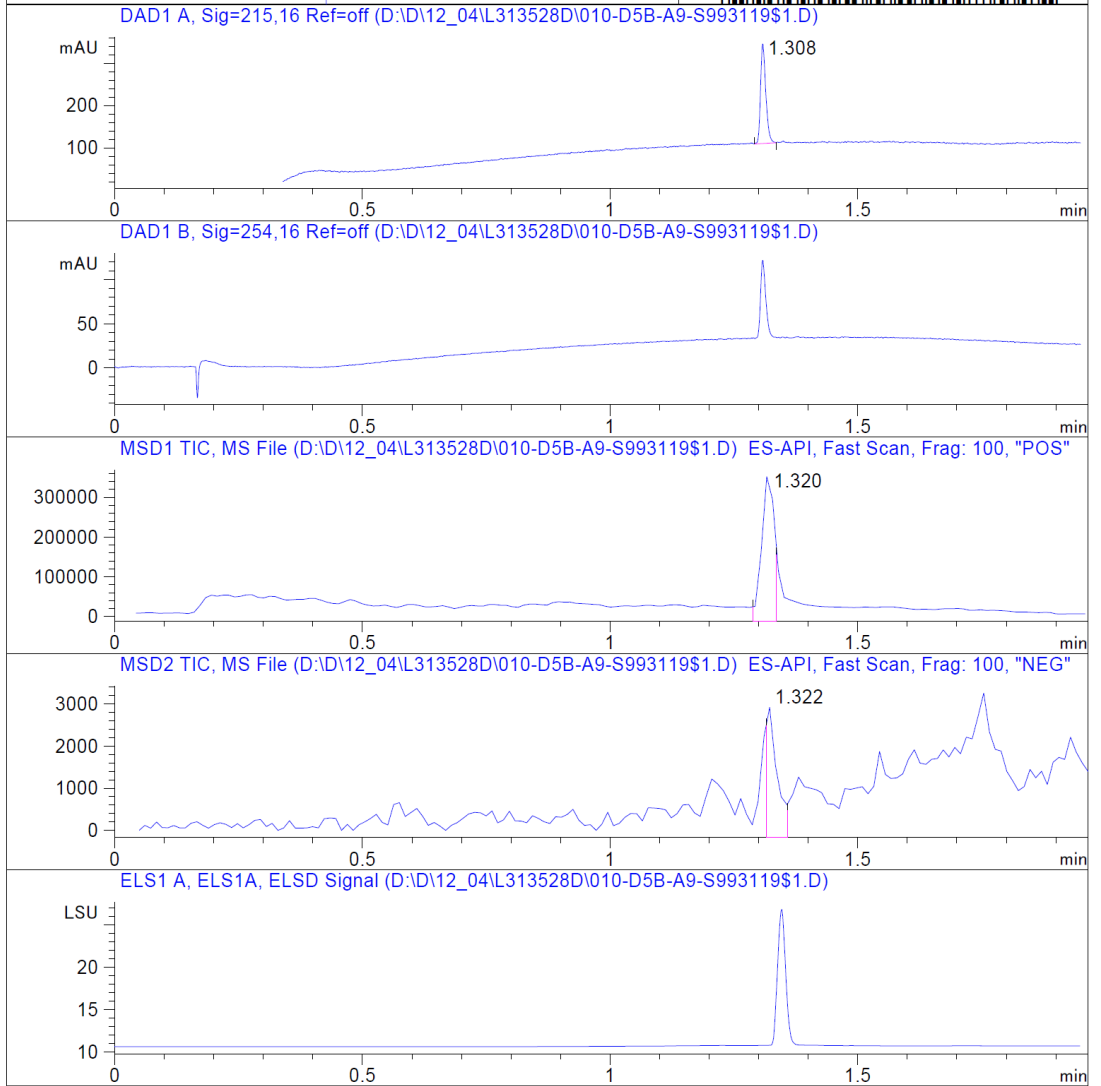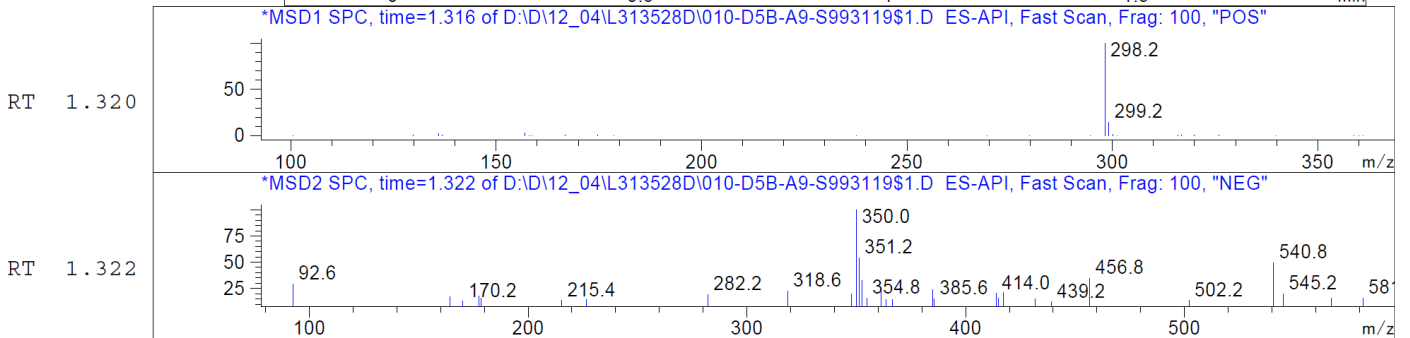

Z2851916546

Z2851916546

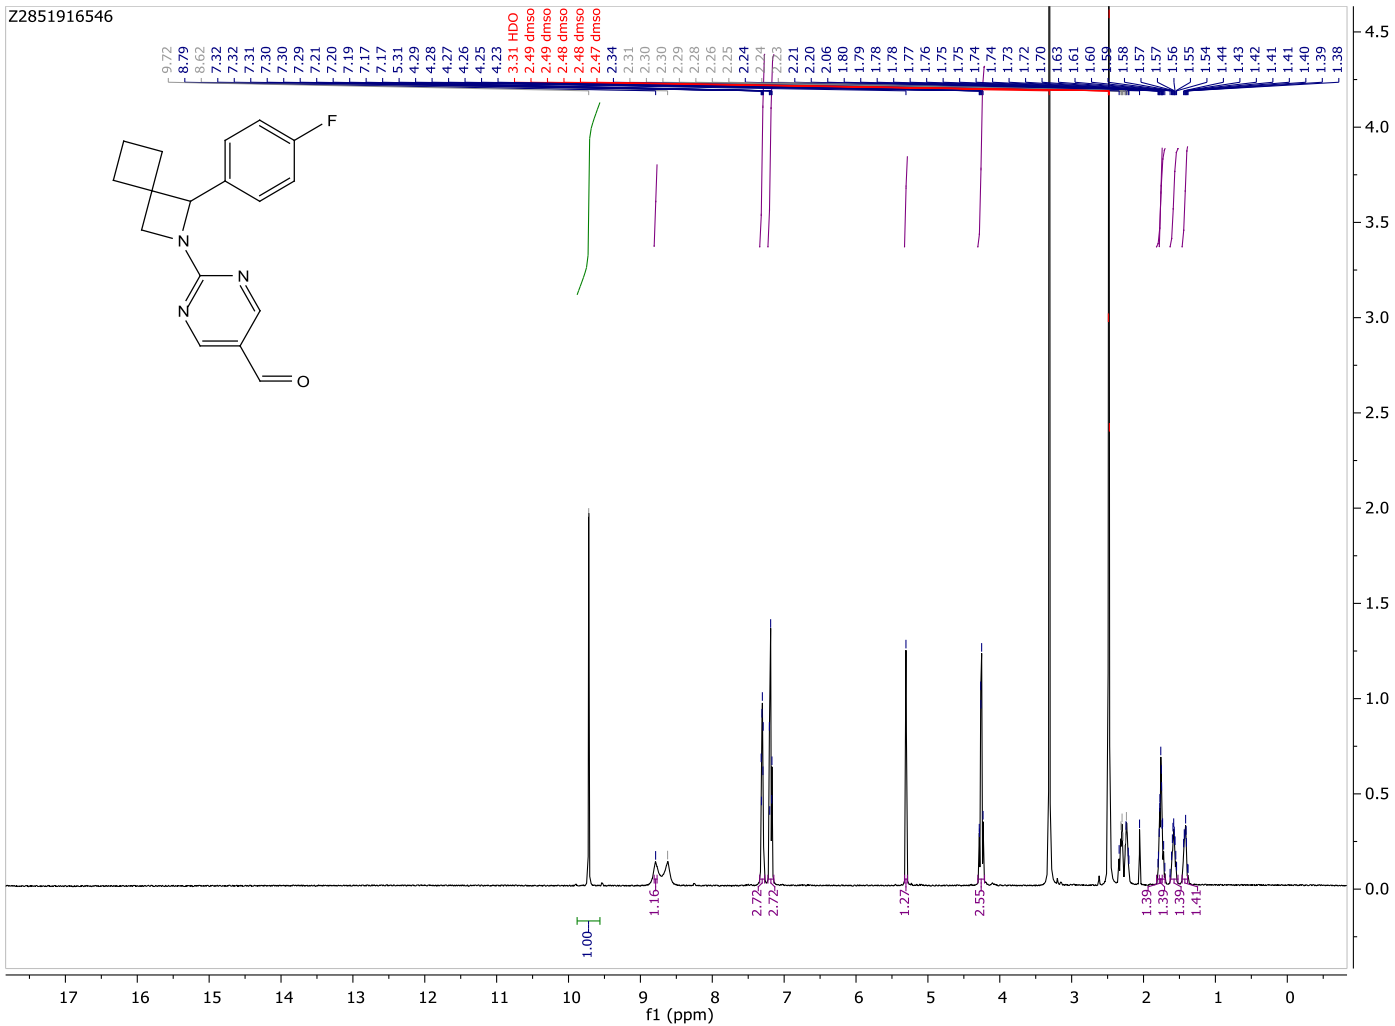



# S993127\$1

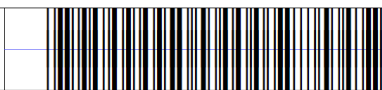

MaxPeak: 90.85%  
Ret\_Time: 1.344 min

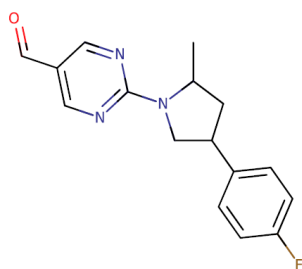

Mol Wt 285.32  
Exact Mass 285.15

| # | Time  | Area% |
|---|-------|-------|
| 1 | 1.324 | 9.15  |
| 2 | 1.344 | 90.85 |

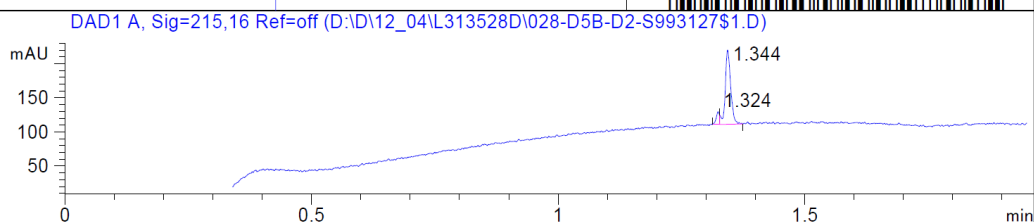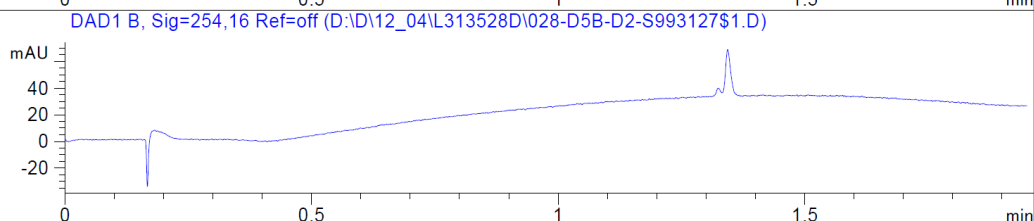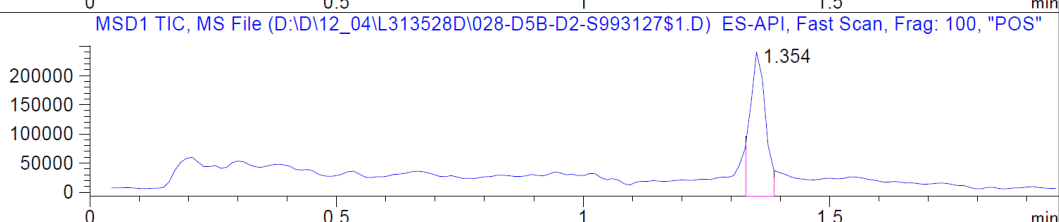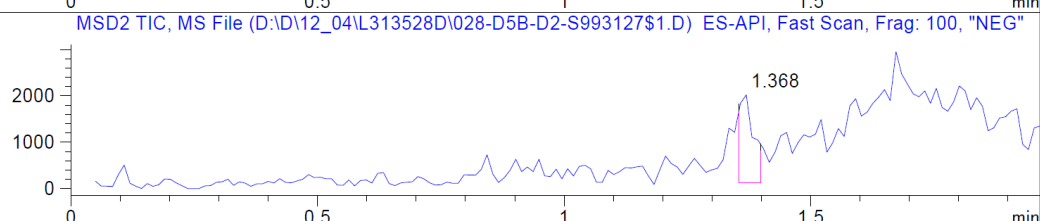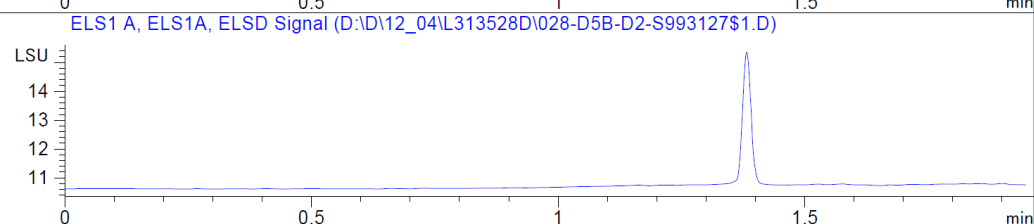

RT 1.354

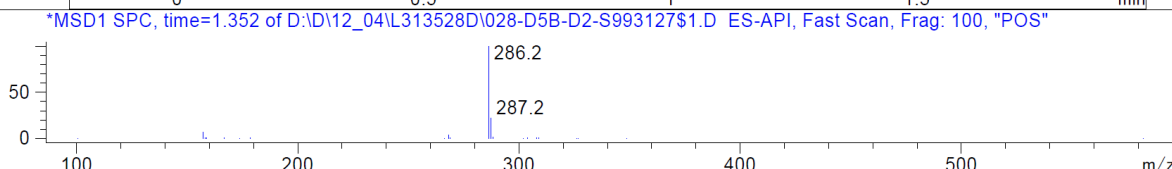

RT 1.368

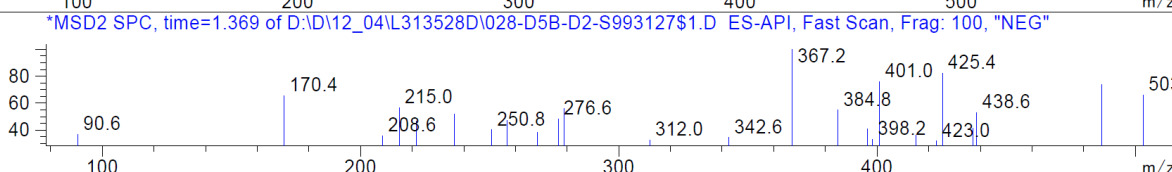

Z2850584231\_(ZINC881997690)

Z2850584231\_(ZINC881997690)

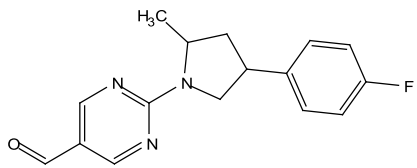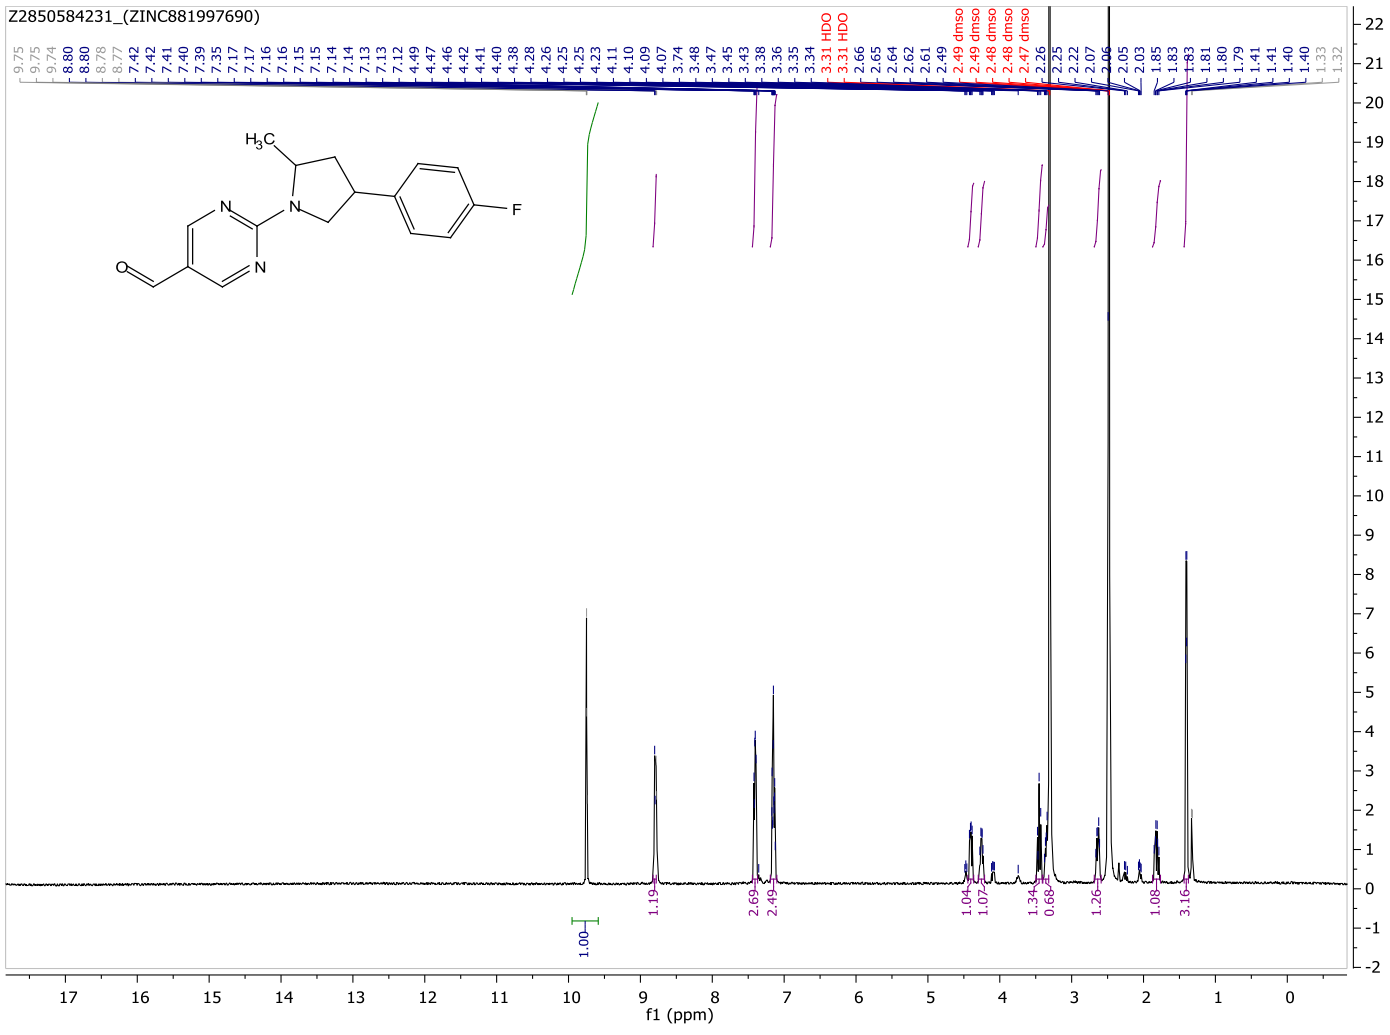

# S999646\$1

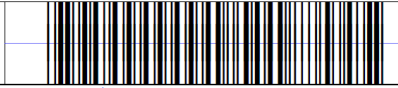

MaxPeak: 100.00%  
Ret\_Time: 1.625 min

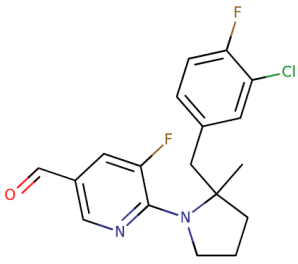

**Mol Wt** 350.79  
**Exact Mass** 350.13

| # | Time  | Area%  |
|---|-------|--------|
| 1 | 1.625 | 100.00 |

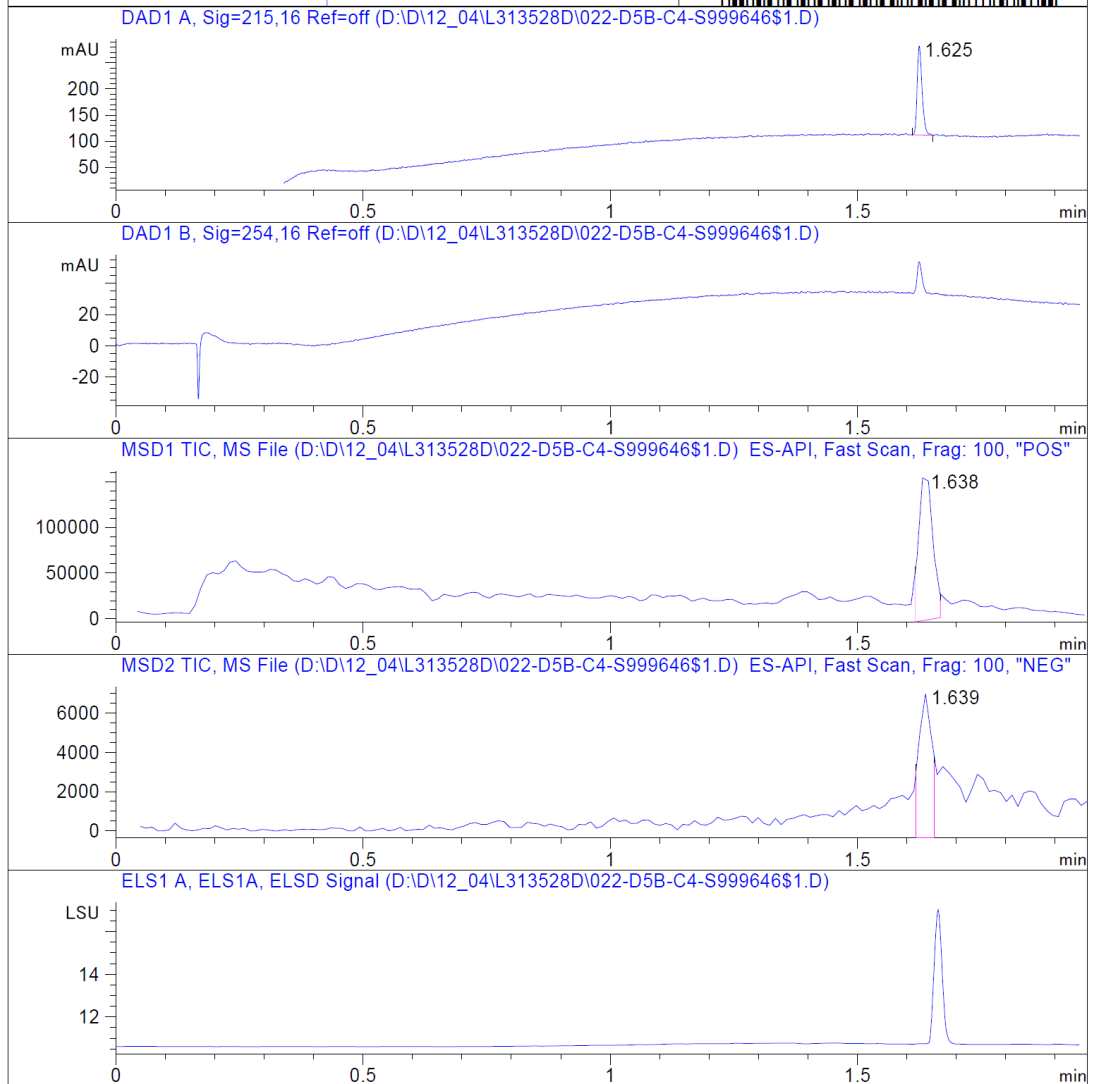

RT 1.638

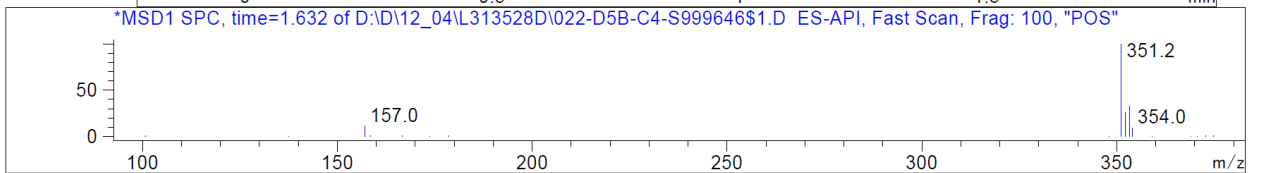

RT 1.639

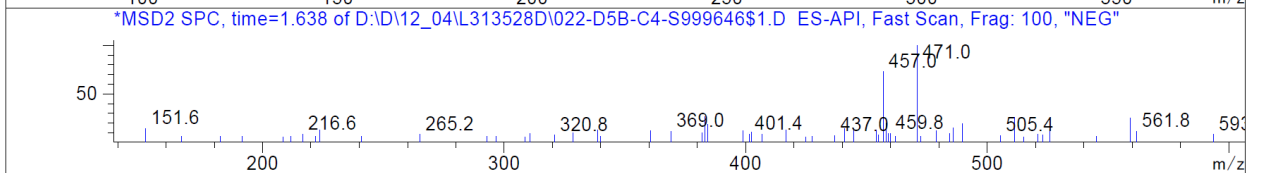

Z4767502333

Z4767502333

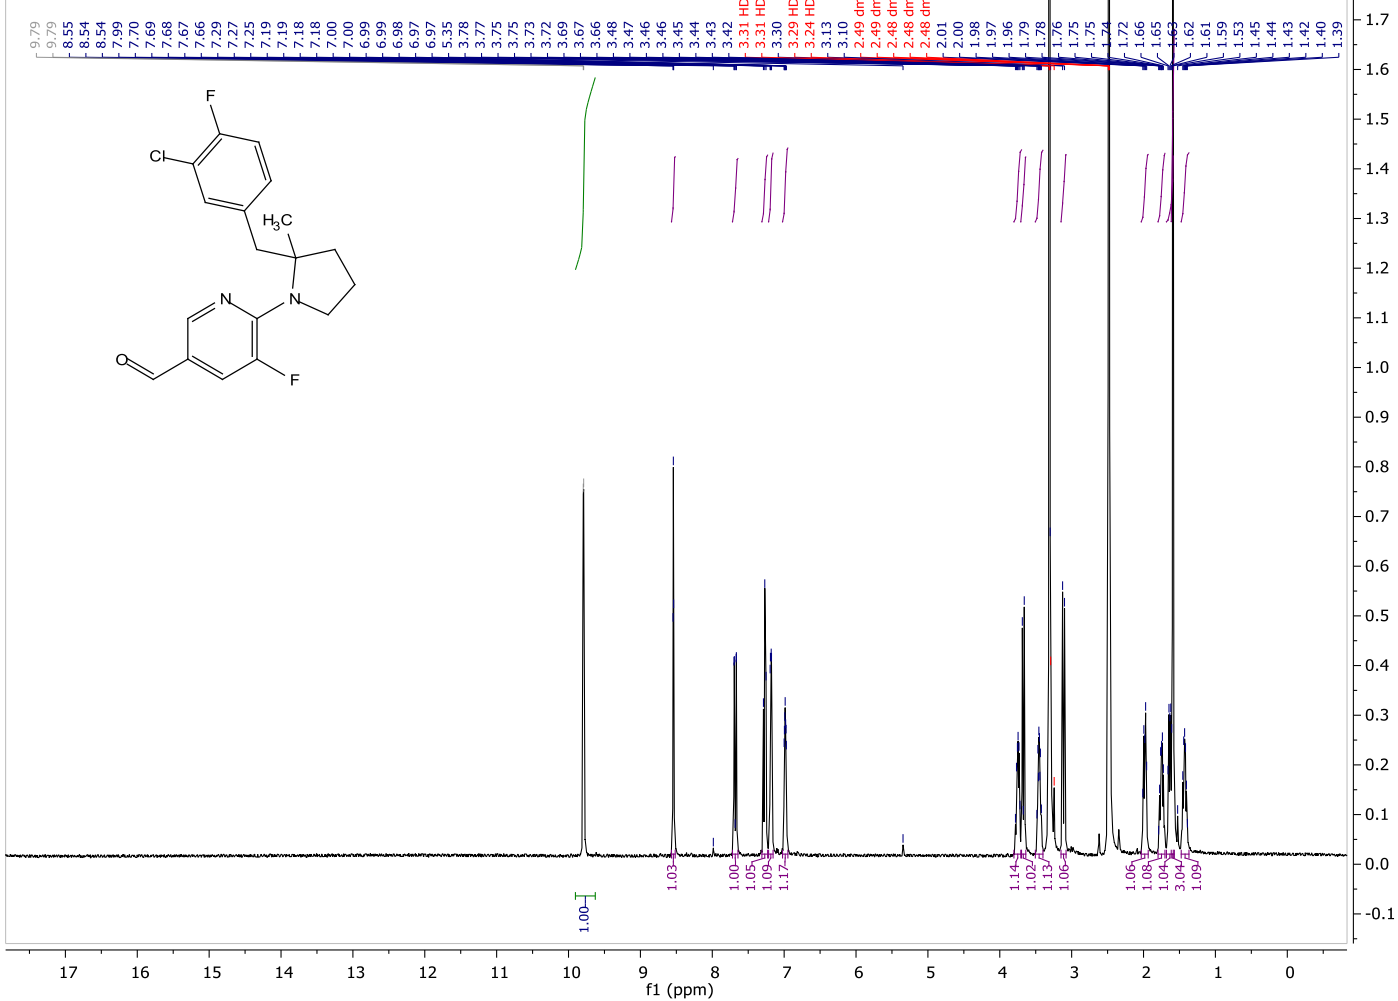

MaxPeak: 100.00%  
Ret\_Time: 1.569 min

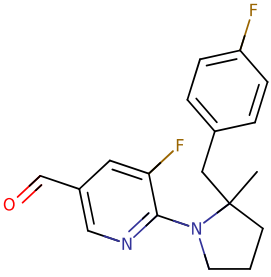

Mol Wt 316.35  
Exact Mass 316.17

| # | Time  | Area%  |
|---|-------|--------|
| 1 | 1.569 | 100.00 |

S999649\$1

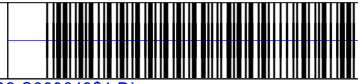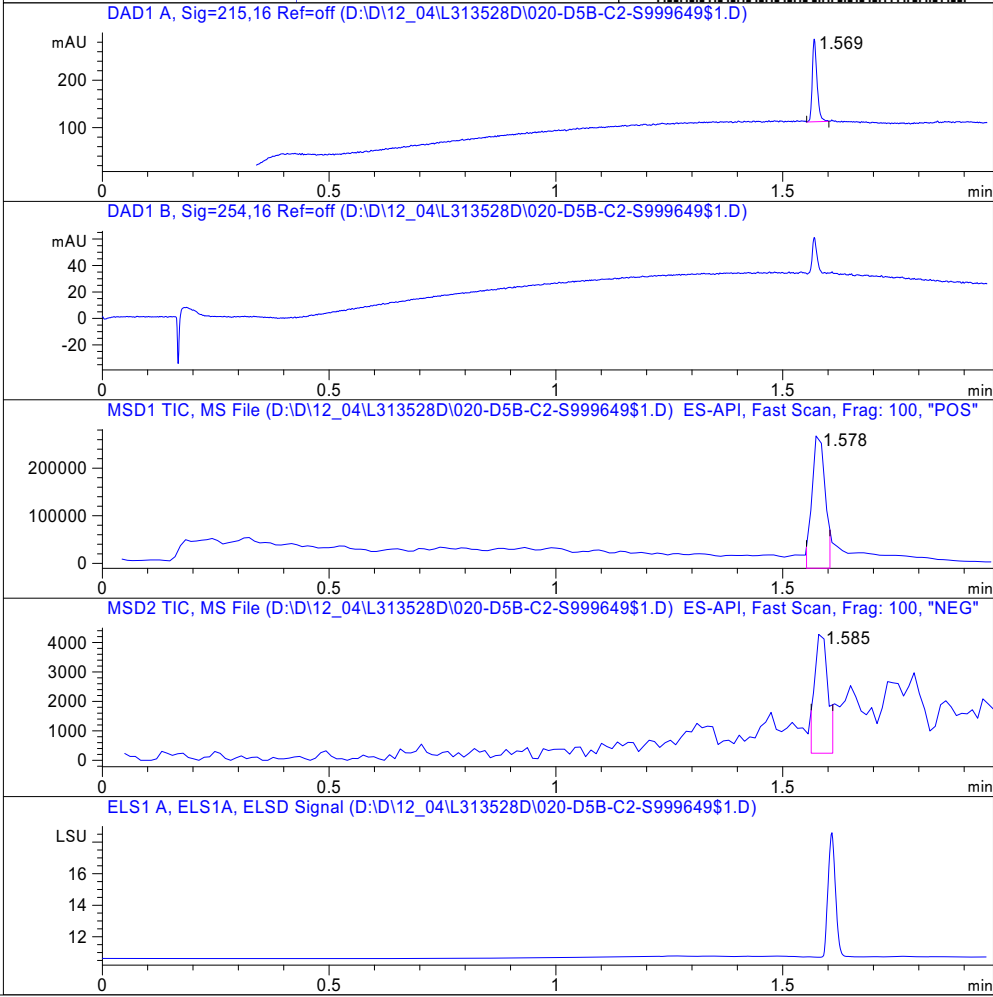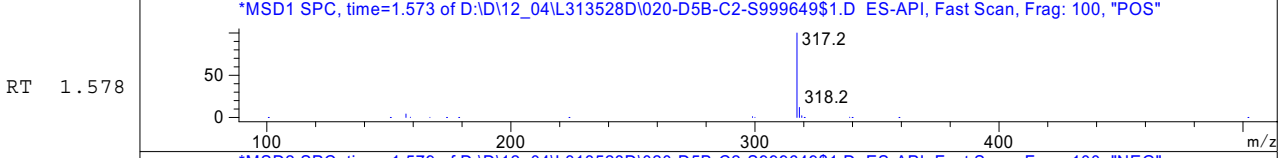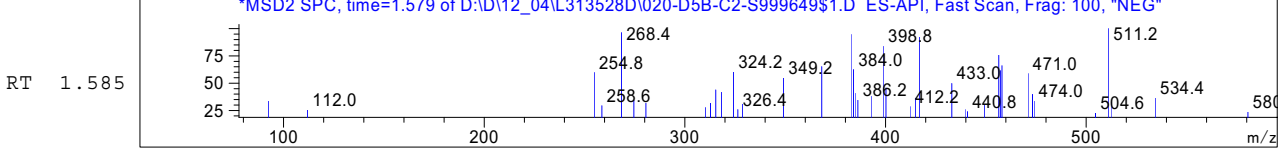

Inj.Date 12/3/2020

N

Acq. Method C:\Users\ -> ->

Z4767502336\_

MaxPeak: 100.00%  
Ret\_Time: 1.062 min

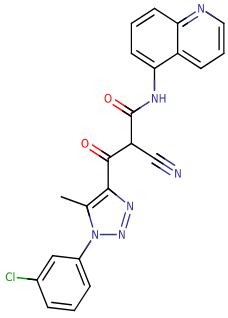

Mol Wt 430.85  
Exact Mass 430.1

| # | Time  | Area%  |
|---|-------|--------|
| 1 | 1.062 | 100.00 |

S993149\$3

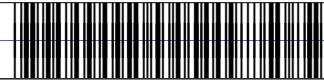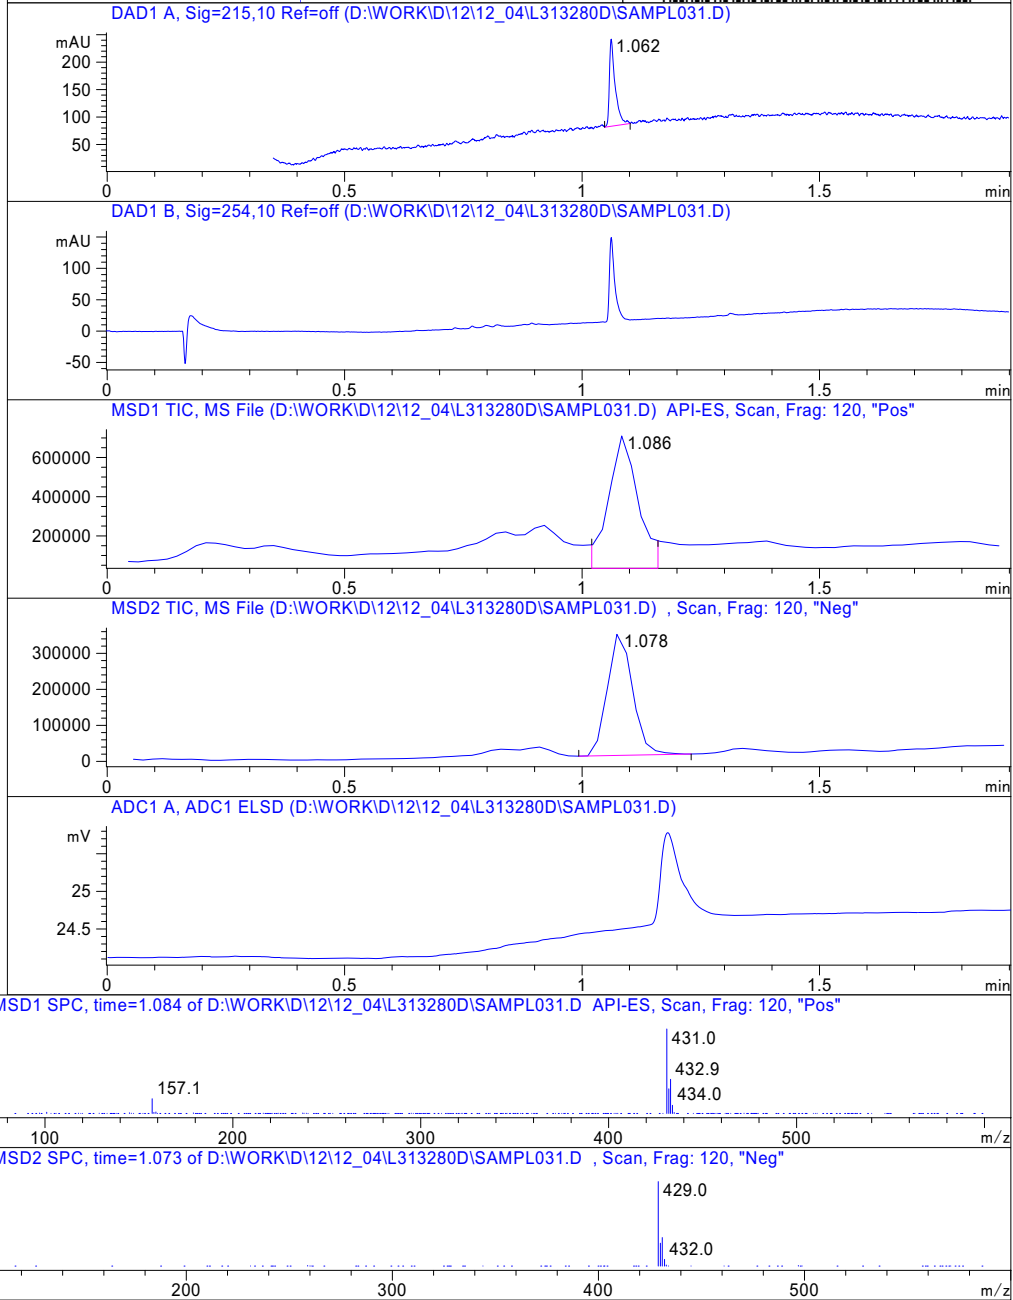

RT 1.086

RT 1.078

Inj.Date 12/4/2020

K

-VL-

Acq. Method C:\HPCHEM\ -> ->

Z762205396\_

MaxPeak: 100.00%  
Ret\_Time: 1.171 min

S993131\$5A

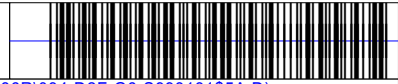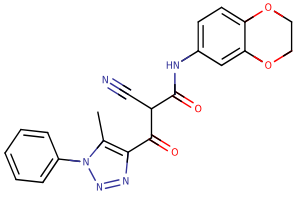

Mol Wt 403.39  
Exact Mass 403.13

| # | Time  | Area%  |
|---|-------|--------|
| 1 | 1.171 | 100.00 |

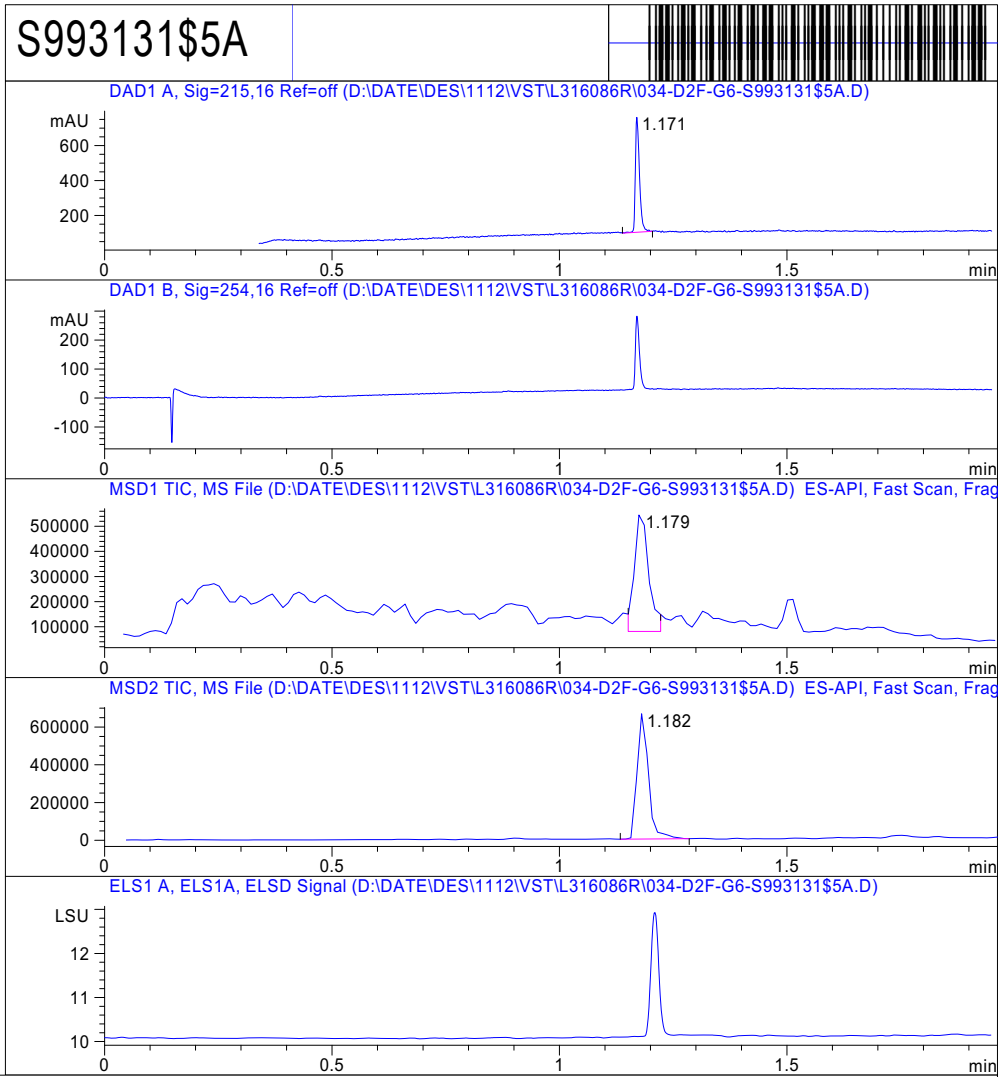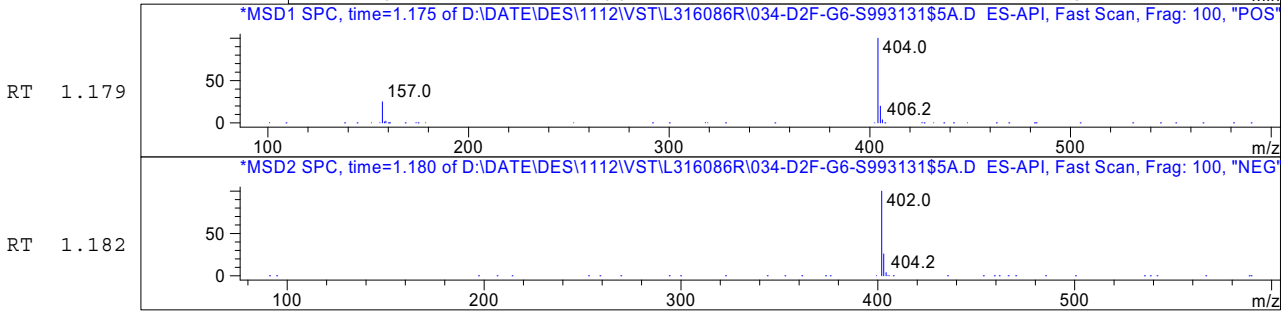

Inj.Date 12/11/2020

Y

Acq. Method C:\Users\ -> ->

Z762217606\_

# S993150\$56

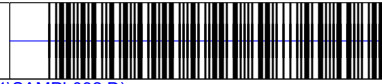

MaxPeak: 94.15%  
Ret\_Time: 1.361 min

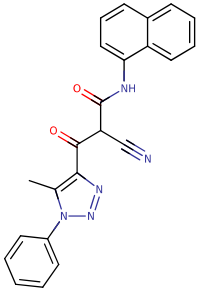

**Mol Wt** 395.41  
**Exact Mass** 395.15

| # | Time  | Area% |
|---|-------|-------|
| 1 | 0.791 | 1.38  |
| 2 | 0.924 | 1.34  |
| 3 | 1.361 | 94.15 |
| 4 | 1.401 | 3.13  |

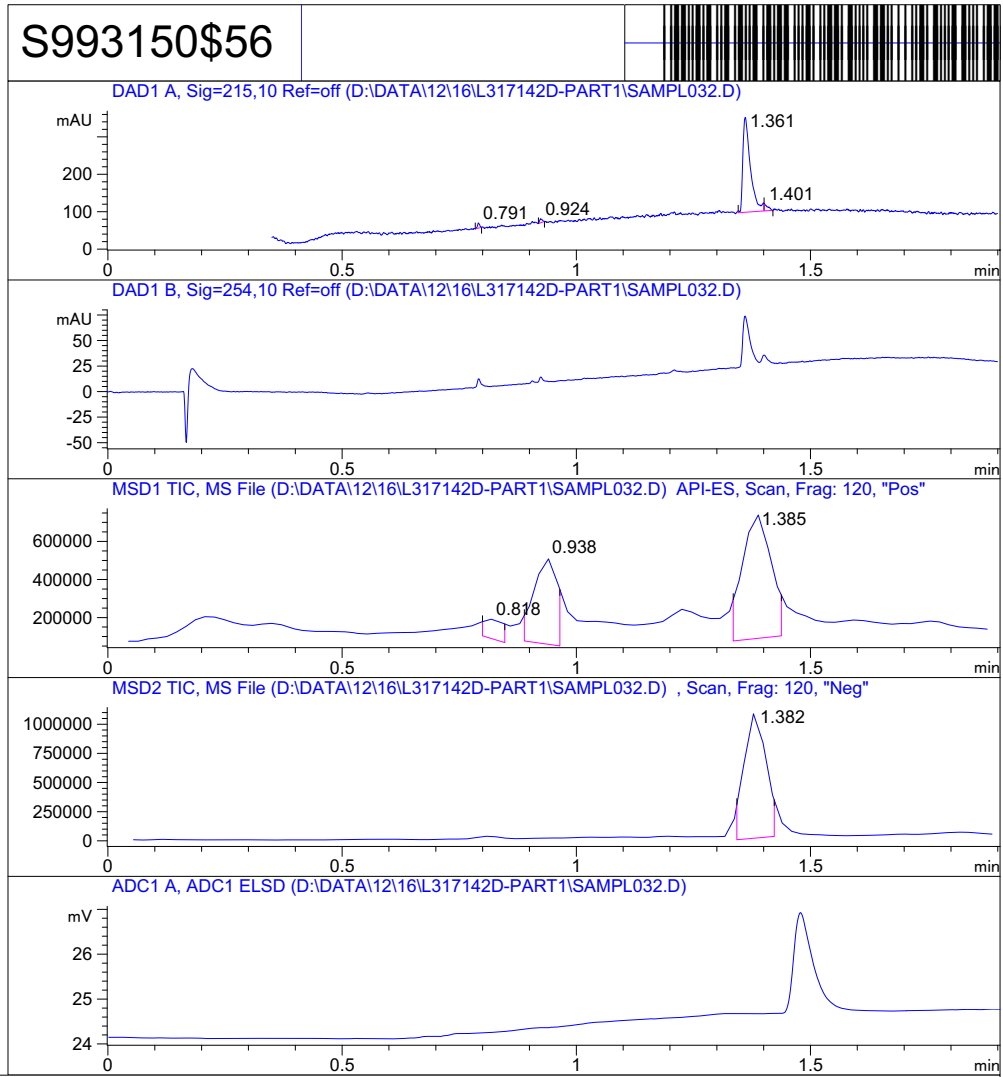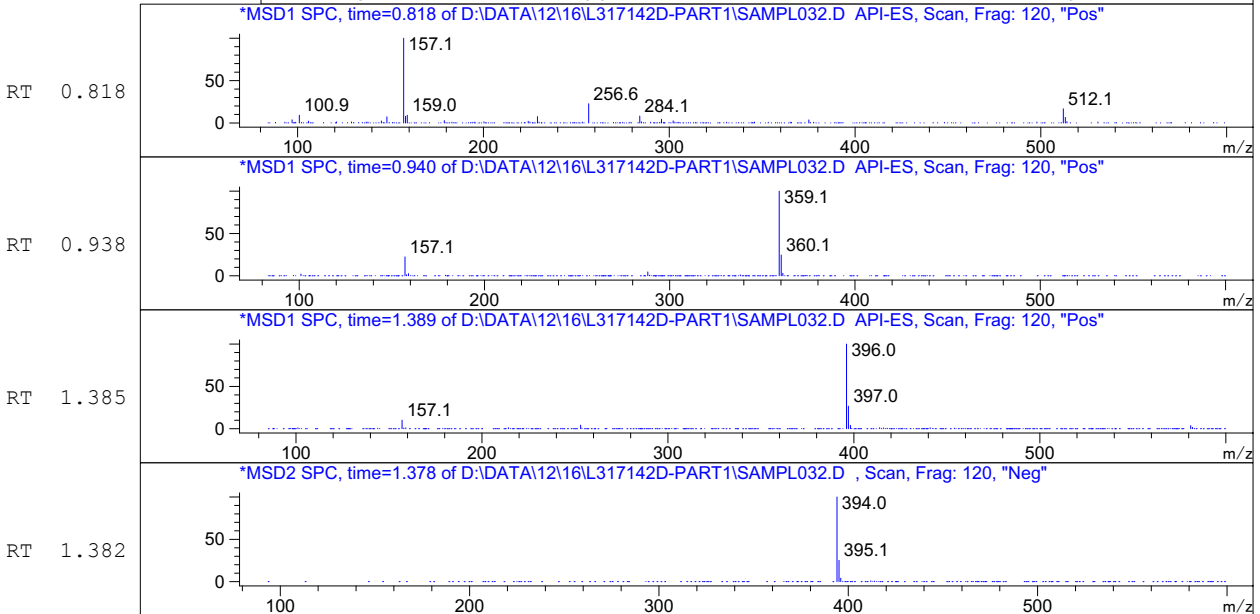

Inj.Date 12/16/2020

LB

-VL-

Acq. Method C:\HPCHEM\ -> ->

Z762209308\_



MaxPeak: 100.00%  
Ret\_Time: 1.246 min

U211101\$2

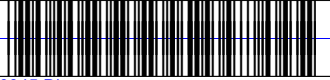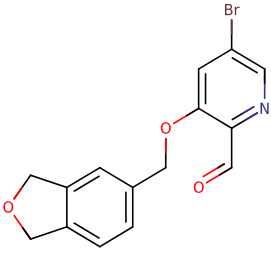

Mol Wt 334.16  
Exact Mass 333.01

| # | Time  | Area%  |
|---|-------|--------|
| 1 | 1.246 | 100.00 |

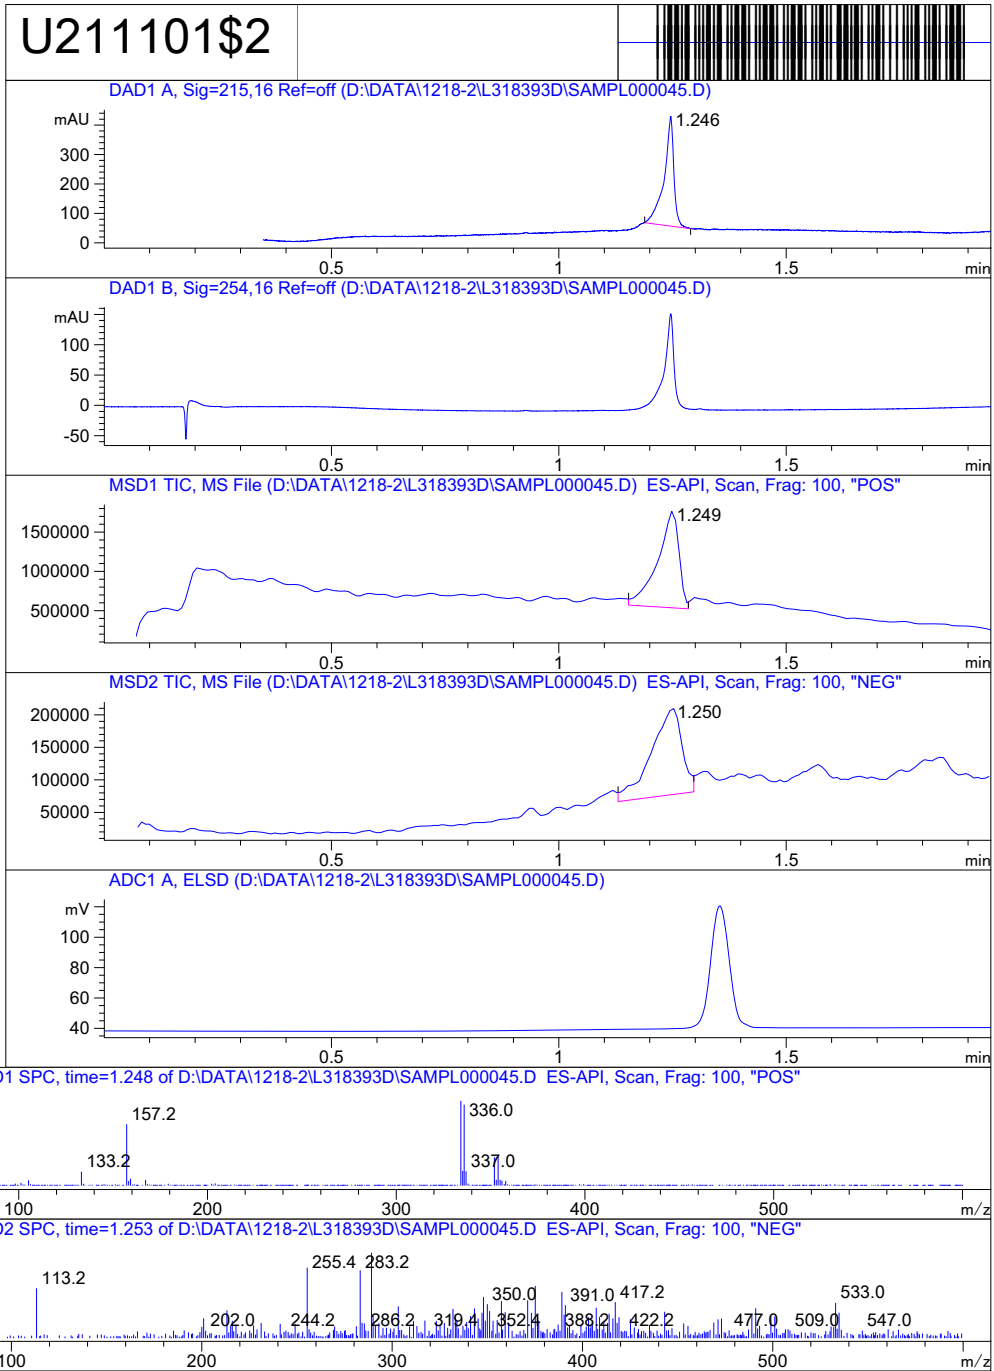

RT 1.249

RT 1.250

MaxPeak: 100.00%  
Ret\_Time: 3.558 min

U211102\$9

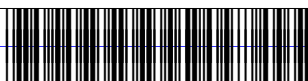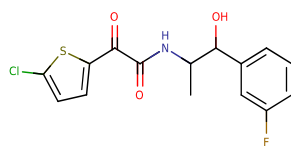

Mol Wt 341.78  
Exact Mass 341.04

| # | Time  | Area%  |
|---|-------|--------|
| 1 | 3.558 | 100.00 |

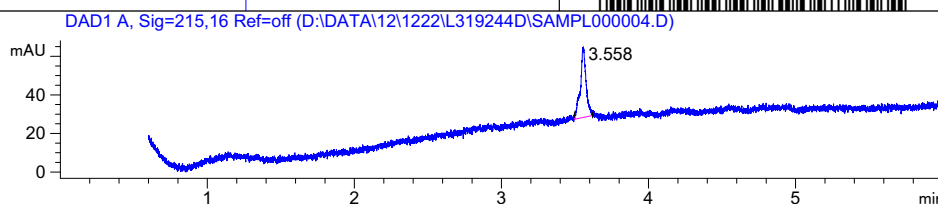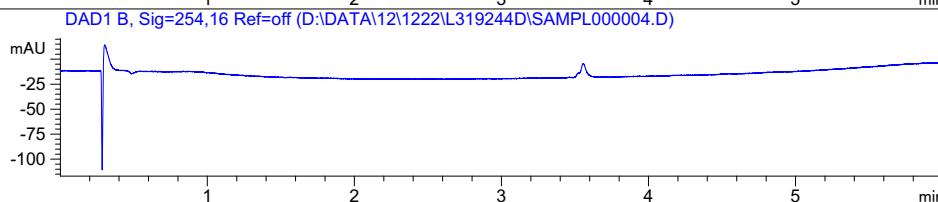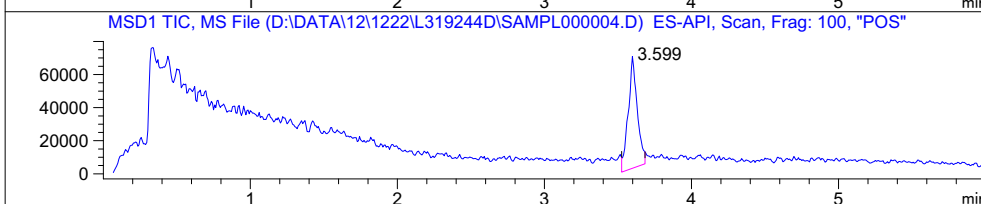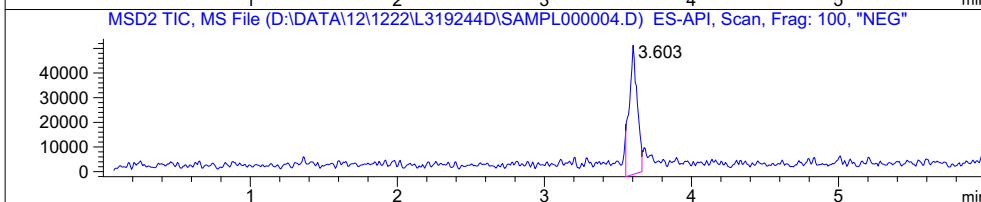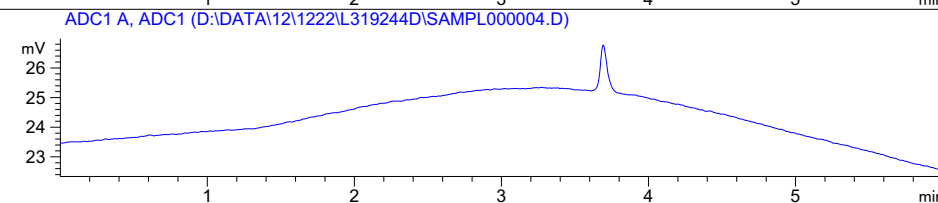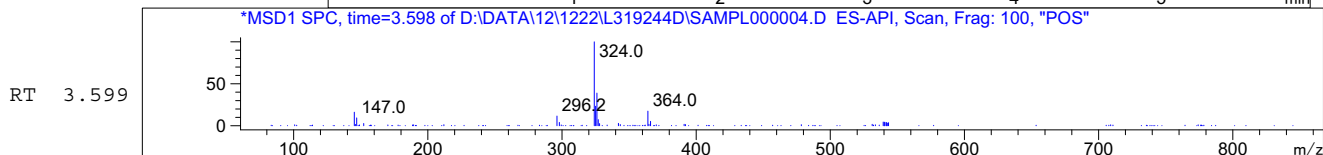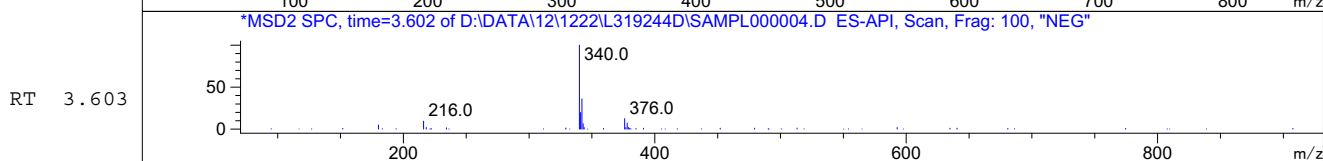

MaxPeak: 96.04%  
Ret\_Time: 1.098 min

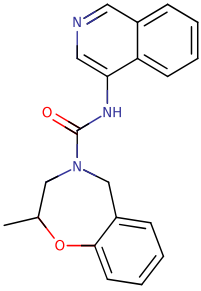

Mol Wt 333.38  
Exact Mass 333.17

| # | Time  | Area% |
|---|-------|-------|
| 1 | 0.815 | 1.16  |
| 2 | 1.098 | 96.04 |
| 3 | 1.542 | 2.79  |

U173081\$3

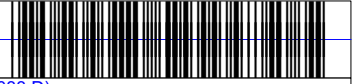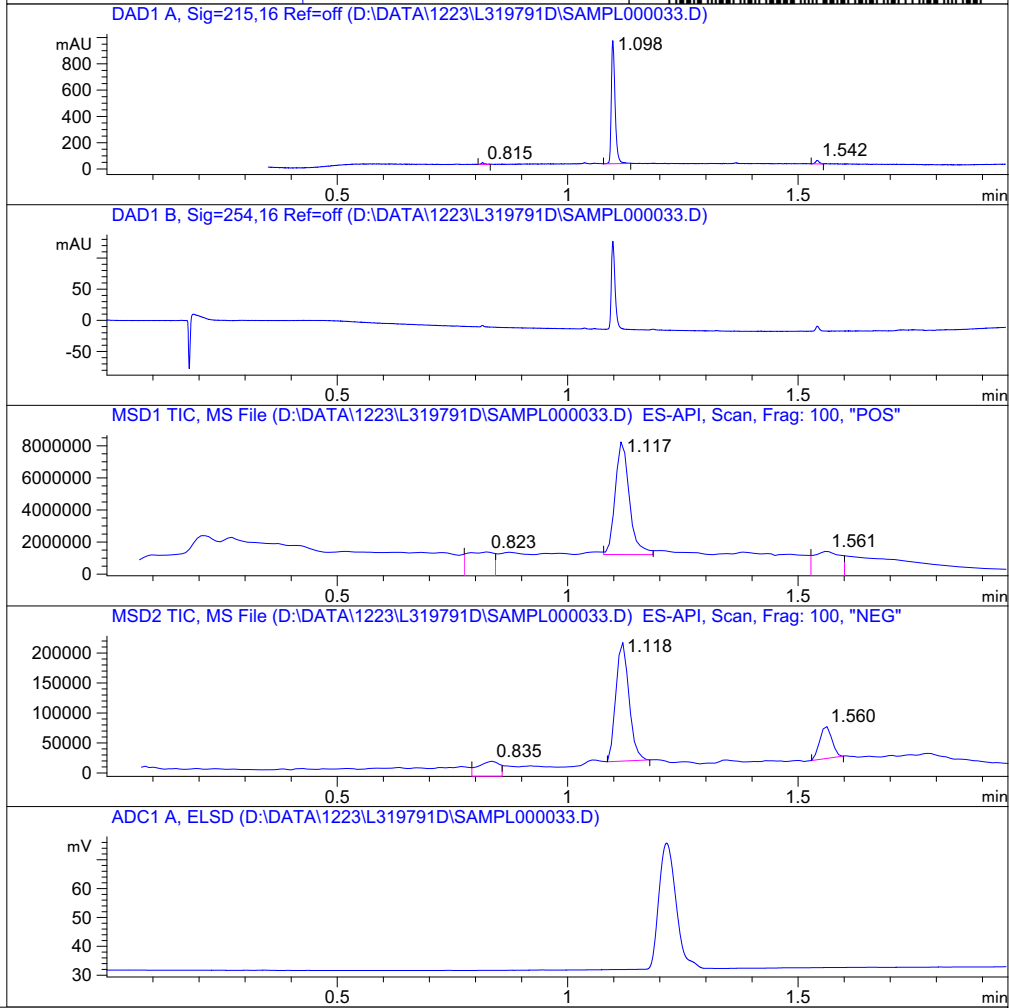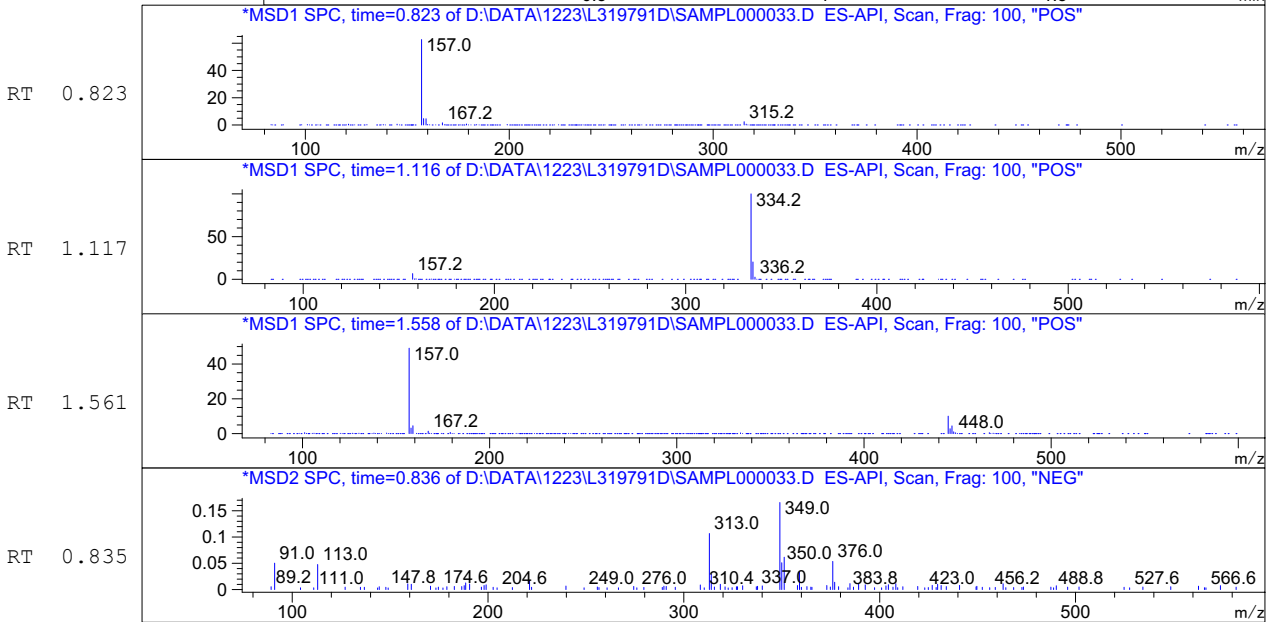

MaxPeak: 98.86%  
Ret\_Time: 0.874 min

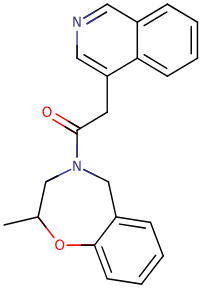

Mol Wt 332.4  
Exact Mass 332.18

| # | Time  | Area% |
|---|-------|-------|
| 1 | 0.874 | 98.86 |
| 2 | 1.182 | 1.14  |

U172997\$2

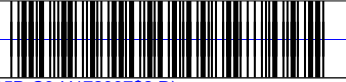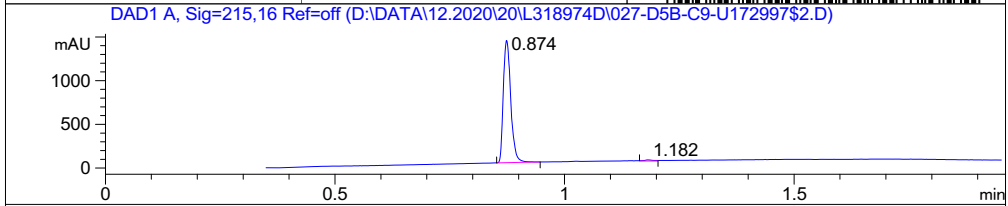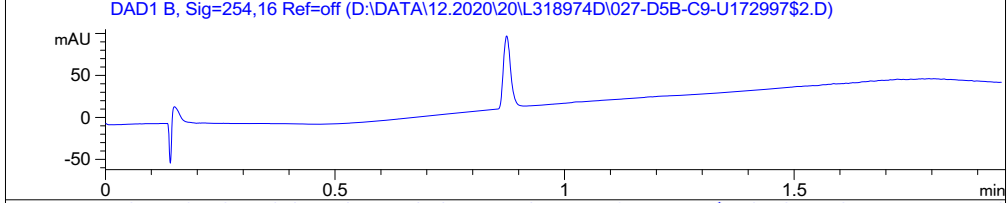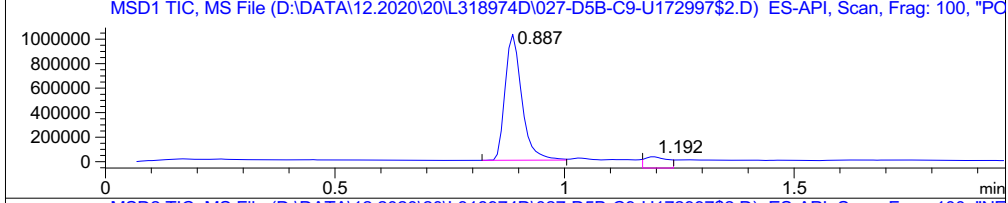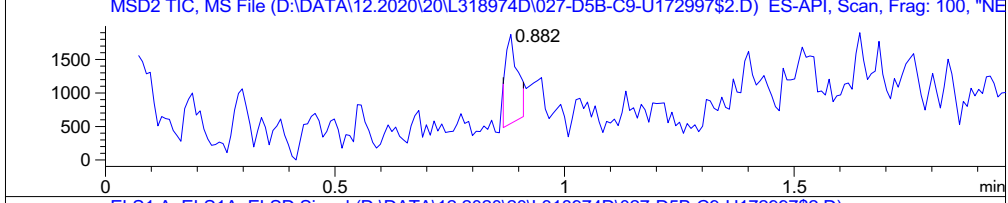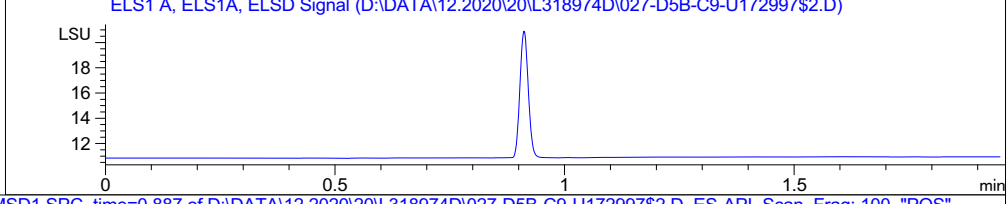

RT 0.887

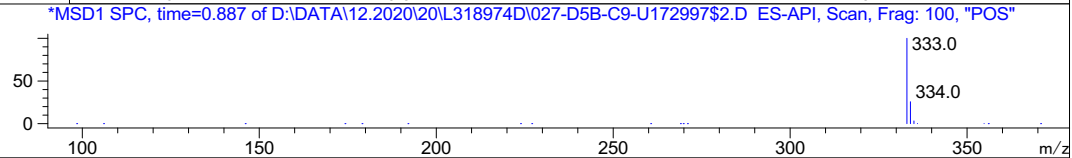

RT 1.192

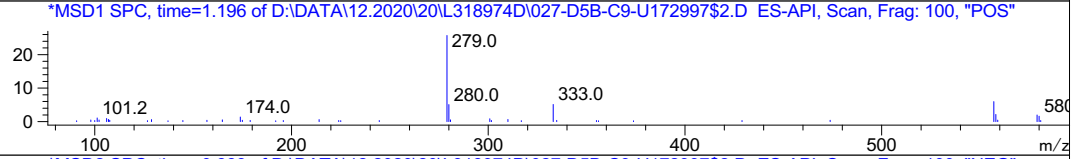

RT 0.882

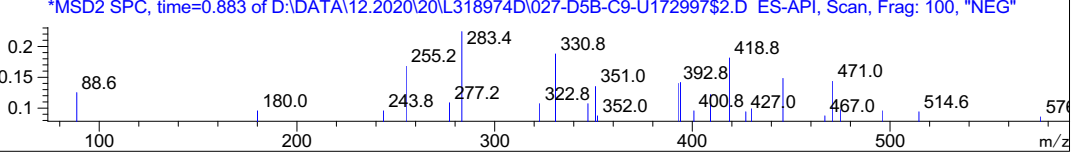

Inj.Date 12/19/2020

CH <invalid> 13

Acq. Method C:\Chem32\ -> ->

Z4872561612\_

# U217010\$A

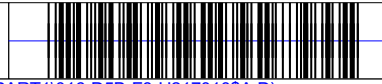

MaxPeak: 100.00%  
Ret\_Time: 1.524 min

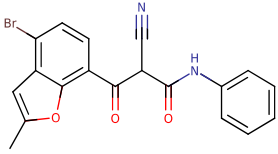

Mol Wt 397.22  
Exact Mass 396.02

| # | Time  | Area%  |
|---|-------|--------|
| 1 | 1.524 | 100.00 |

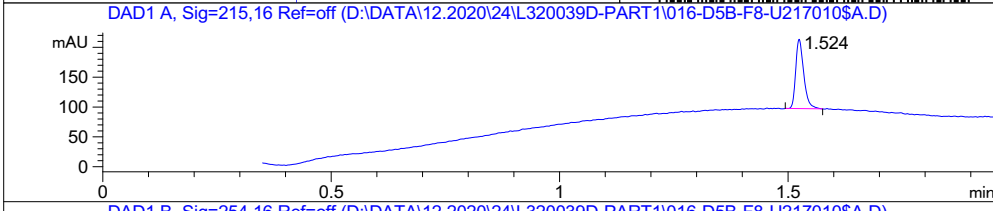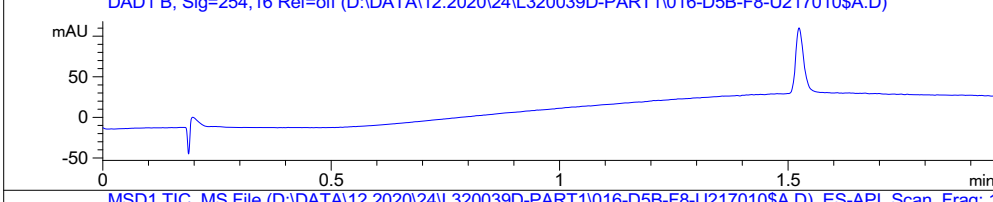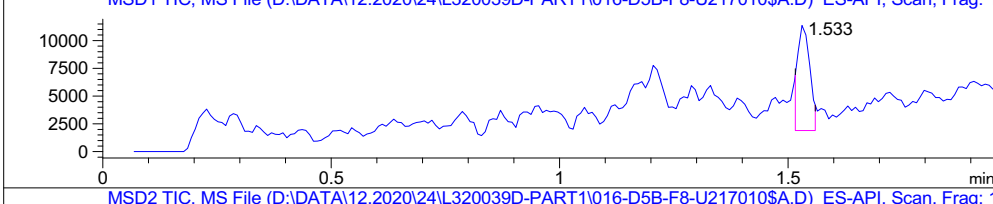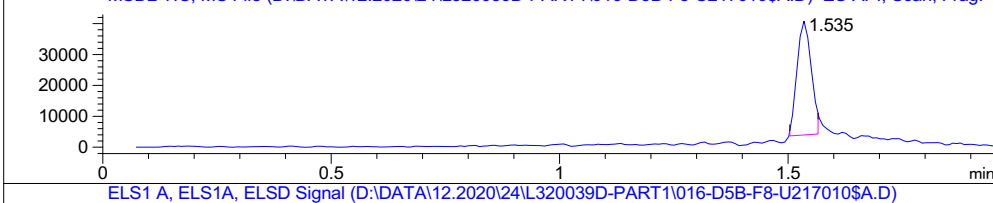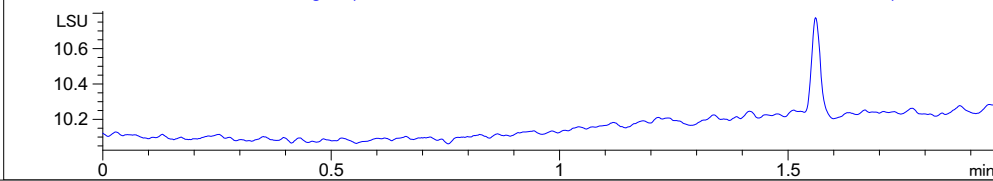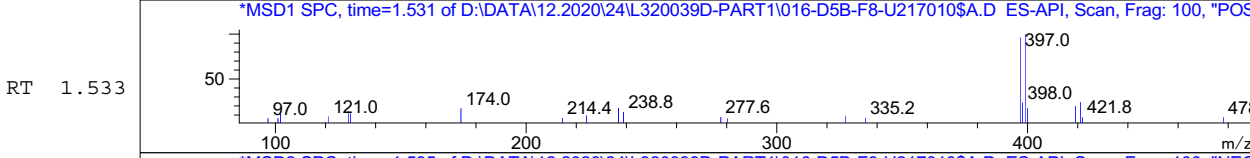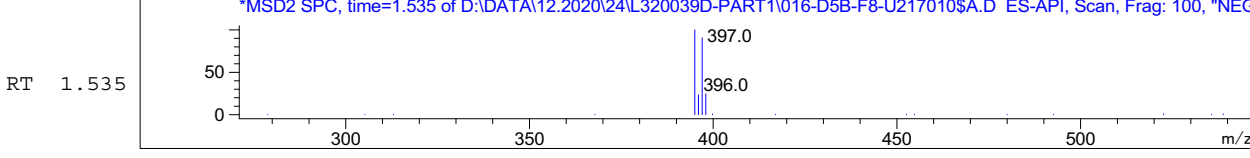

Inj.Date 12/24/2020

CH <invalid> -15-

Acq. Method C:\Chem32\ -> ->

Z1798873704\_

MaxPeak: 100.00%  
Ret\_Time: 1.488 min

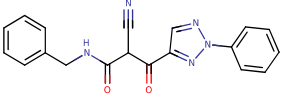

Mol Wt 345.36  
Exact Mass 345.13

| # | Time  | Area%  |
|---|-------|--------|
| 1 | 1.488 | 100.00 |

U253697\$G

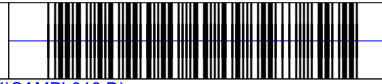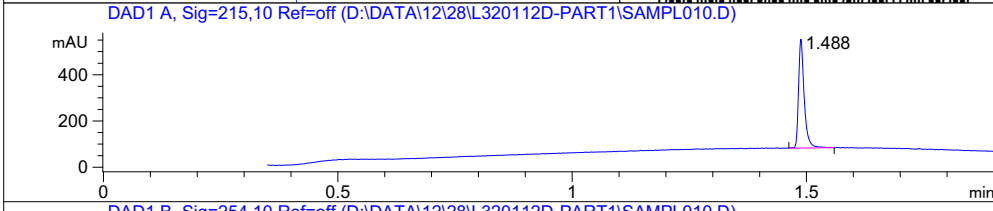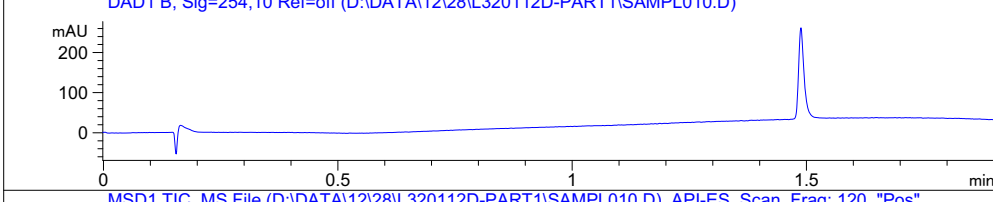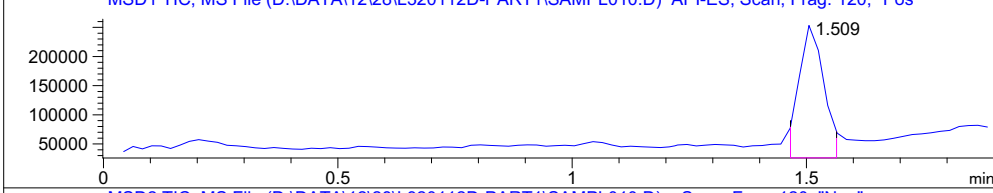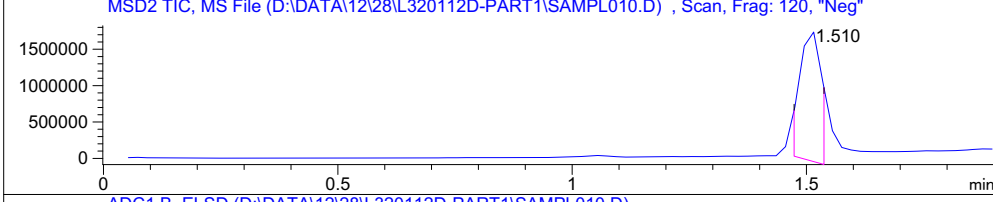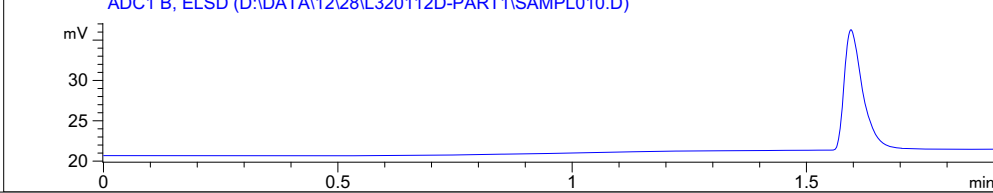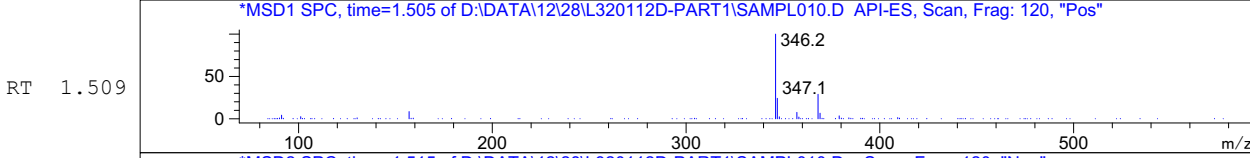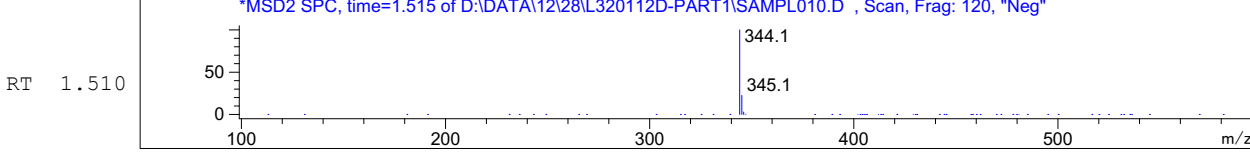

MaxPeak: 100.00%  
Ret\_Time: 1.307 min

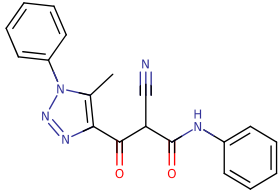

Mol Wt 345.36  
Exact Mass 345.13

| # | Time  | Area%  |
|---|-------|--------|
| 1 | 1.307 | 100.00 |

7165188710

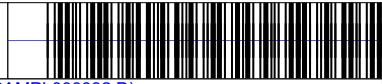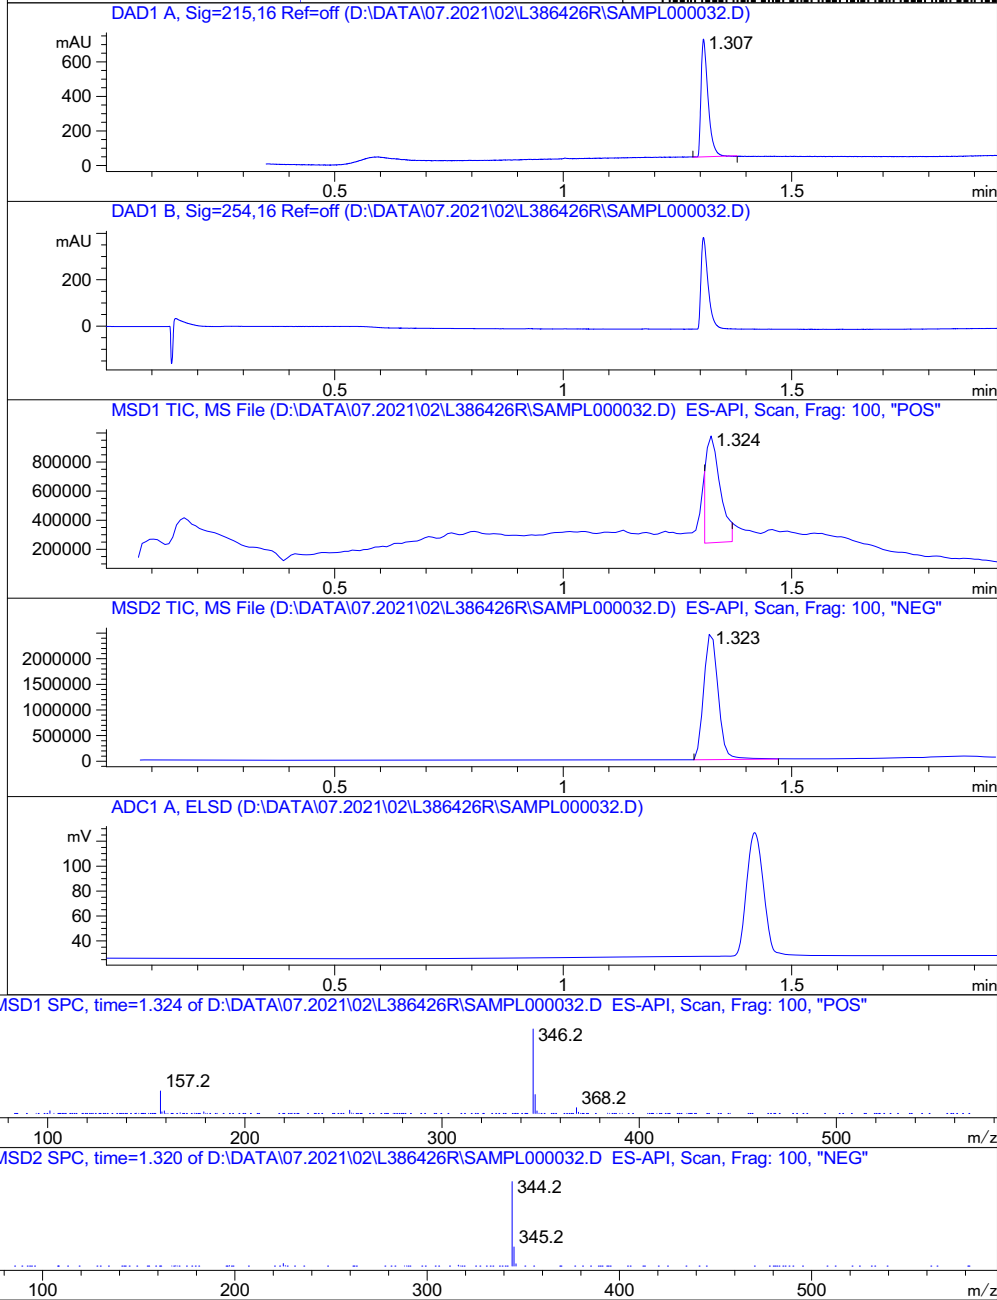

RT 1.324

RT 1.323

Inj.Date 7/2/2021

CH

P2-C-01

-5-

Acq. Method C:\CHEM32\ ->

->

Z762207984\_

MaxPeak: 97.01%  
Ret\_Time: 1.631 min

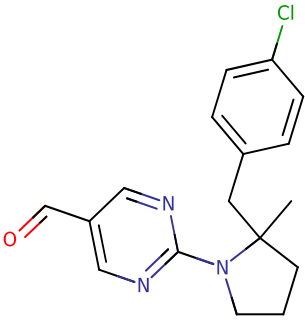

Mol Wt 315.8  
Exact Mass 315.14

| # | Time  | Area% |
|---|-------|-------|
| 1 | 0.942 | 2.99  |
| 2 | 1.631 | 97.01 |

U341347\$1

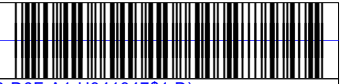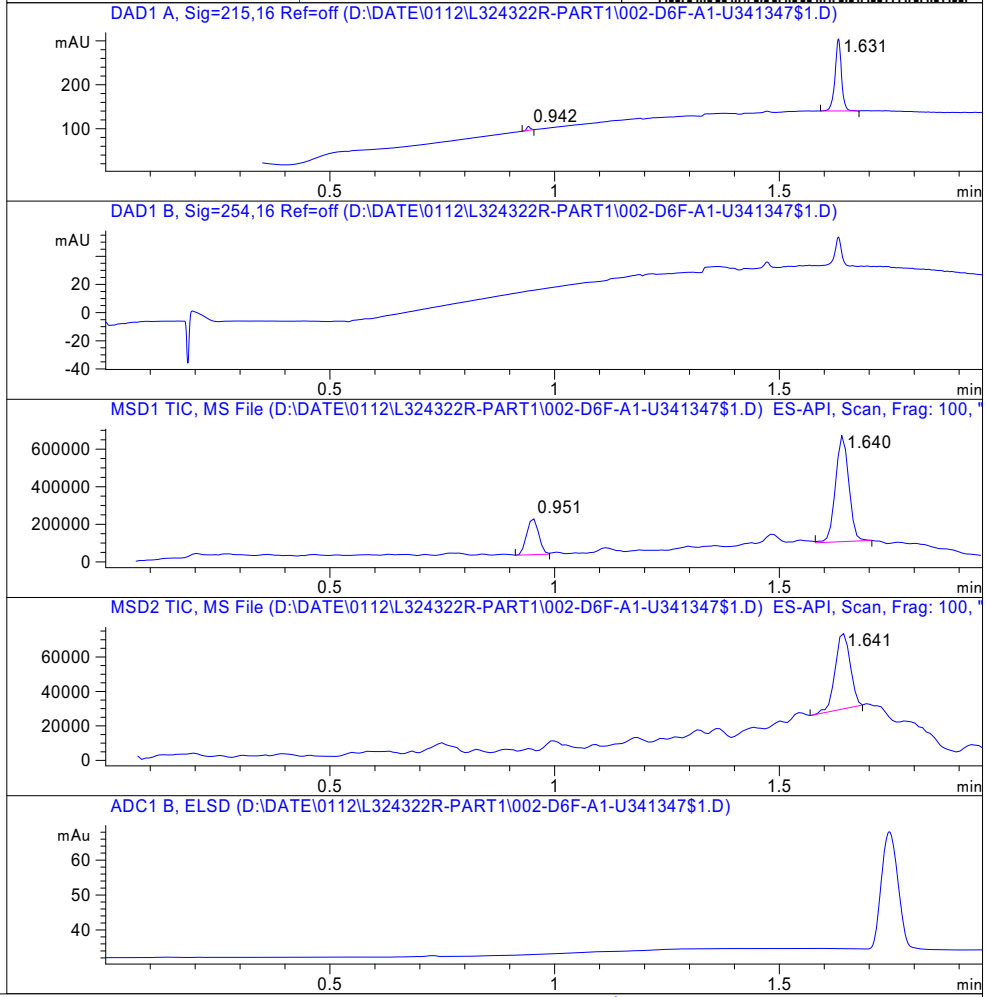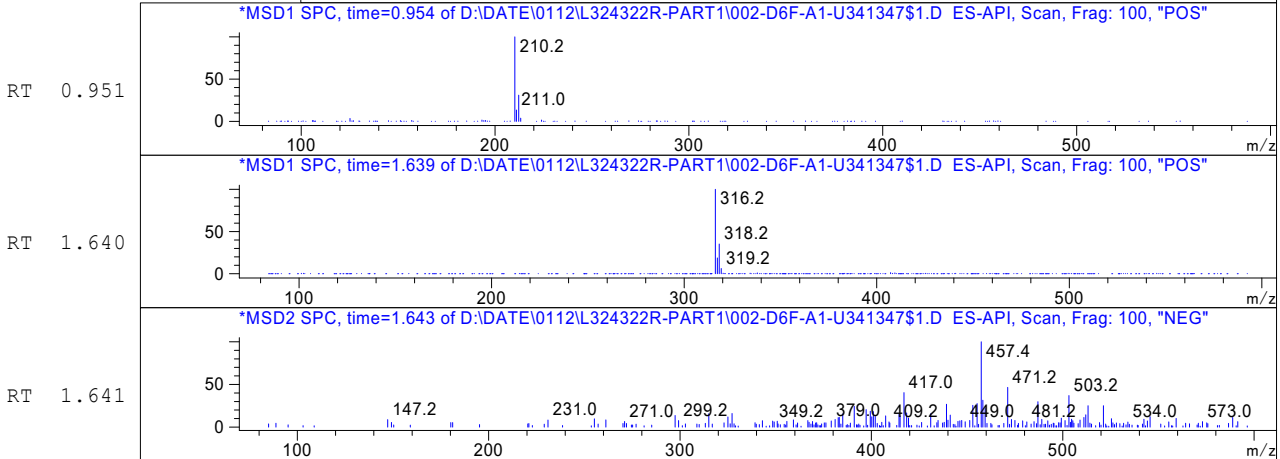



MaxPeak: 100.00%  
Ret\_Time: 1.565 min

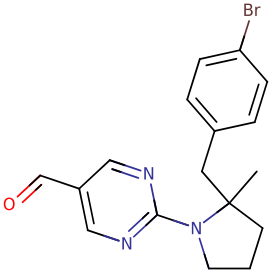

Mol Wt 360.25  
Exact Mass 359.09

| # | Time  | Area%  |
|---|-------|--------|
| 1 | 1.565 | 100.00 |

# U341346\$1

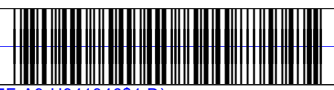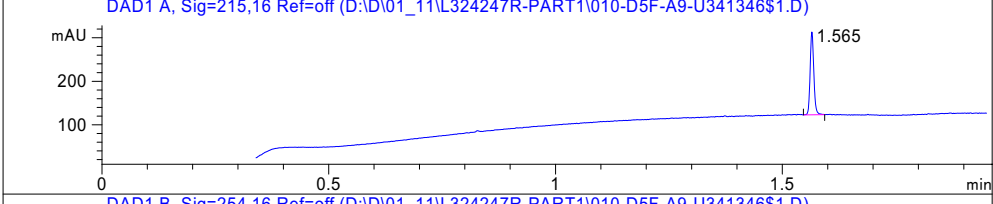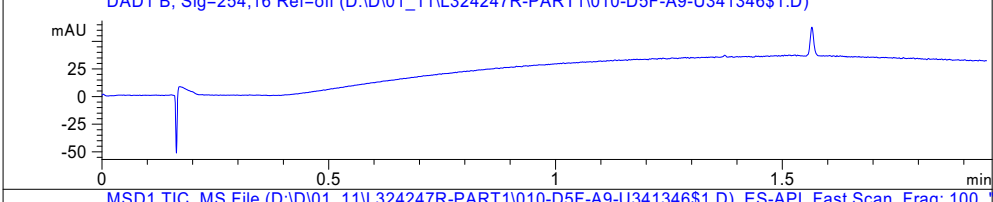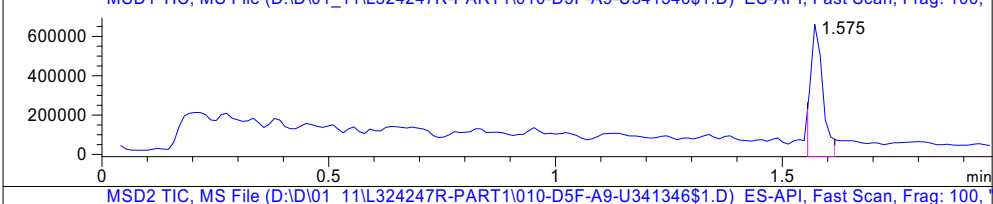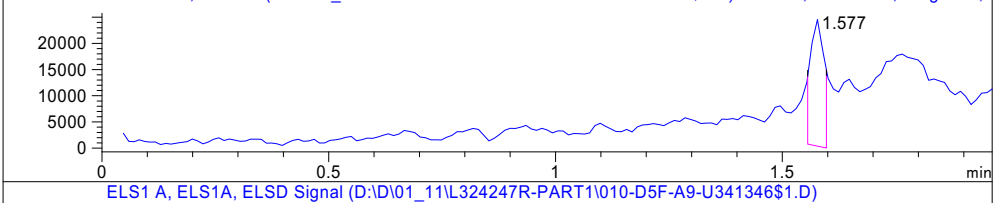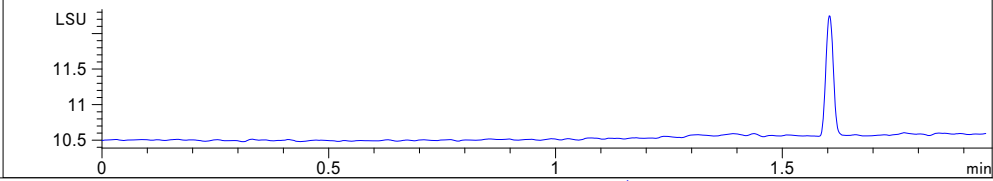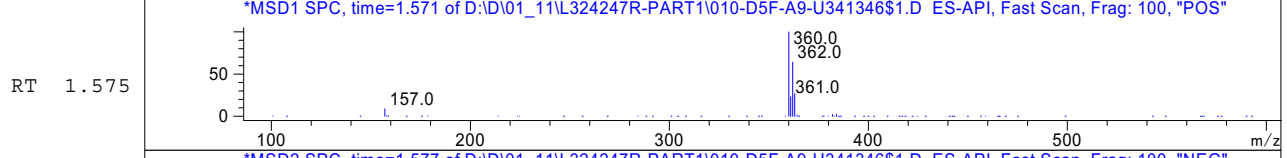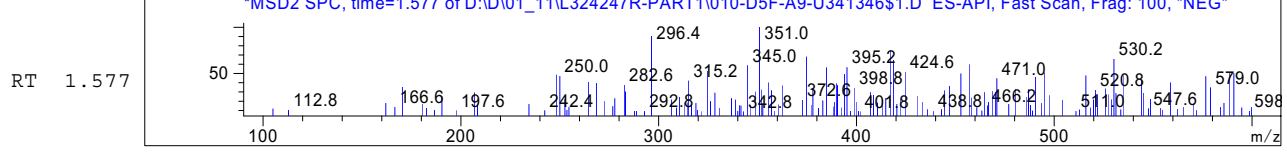

MaxPeak: 100.00%  
Ret\_Time: 1.332 min

U340878\$35

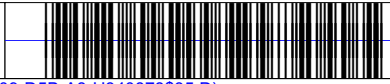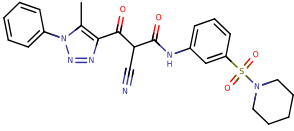

Mol Wt 492.55  
Exact Mass 492.17

| # | Time  | Area%  |
|---|-------|--------|
| 1 | 1.332 | 100.00 |

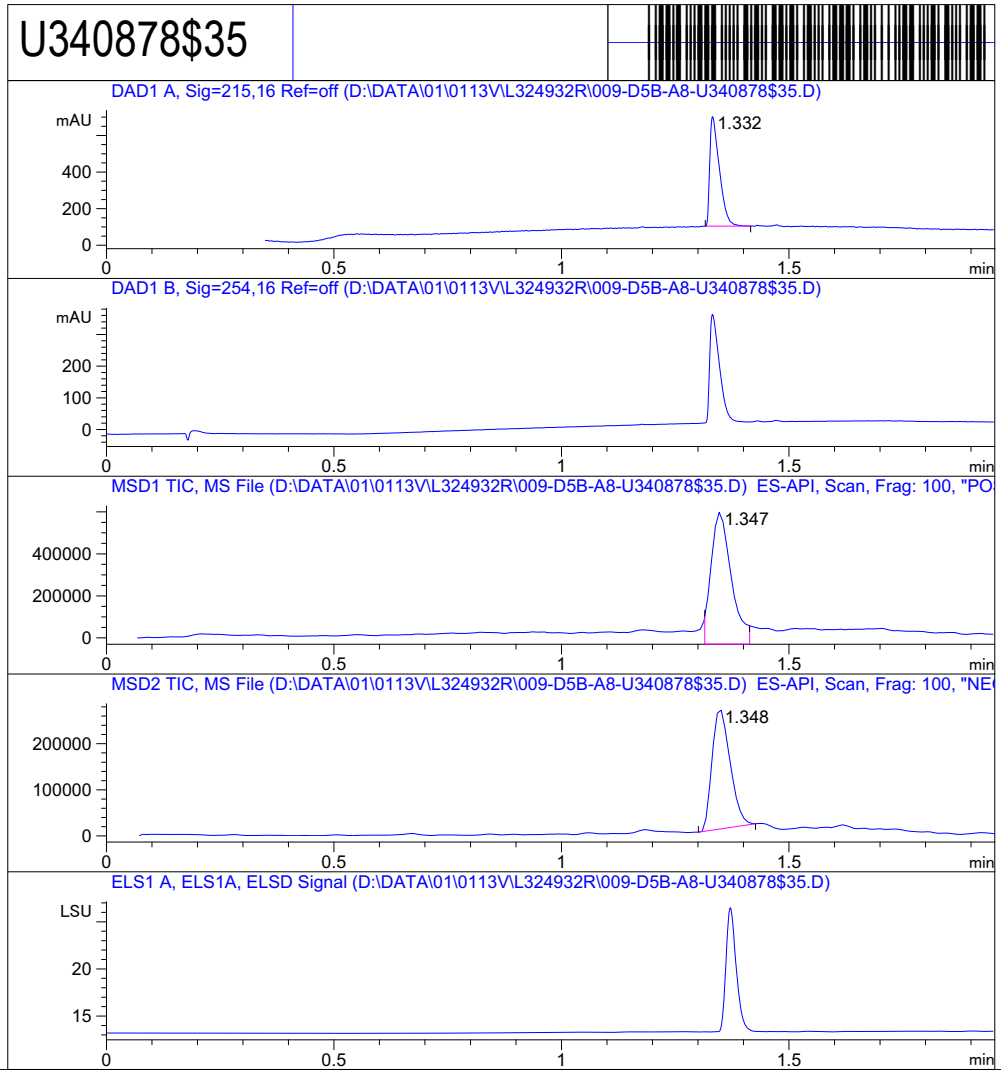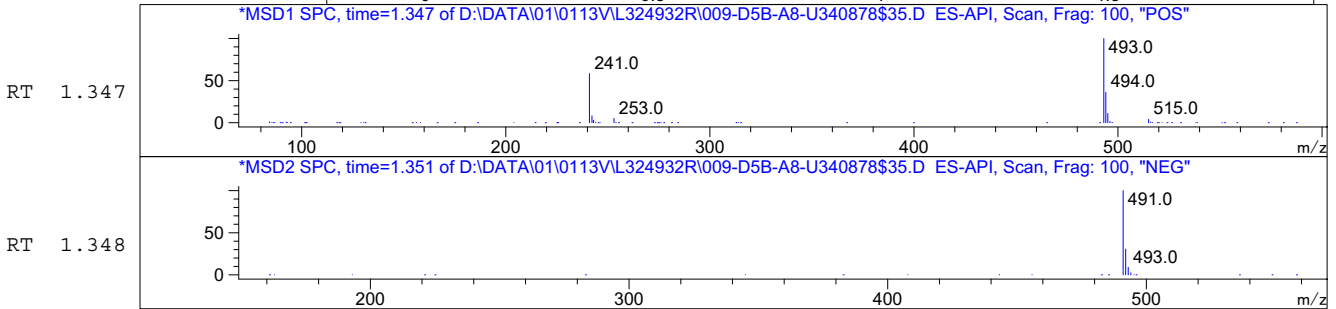

U804751\$32

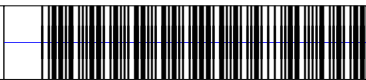

MaxPeak: 100.00%  
Ret\_Time: 1.166 min

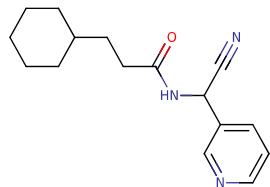

Mol Wt 271.36

Exact Mass 271.2

| # | Time  | Area%  |
|---|-------|--------|
| 1 | 1.166 | 100.00 |

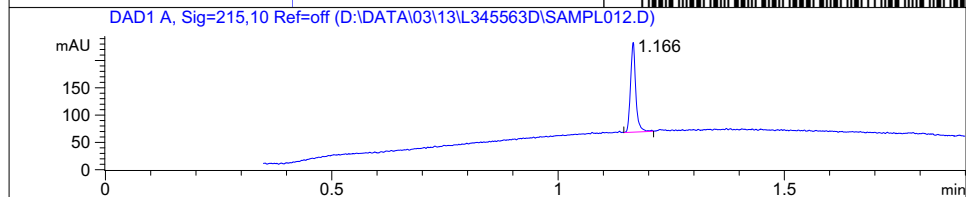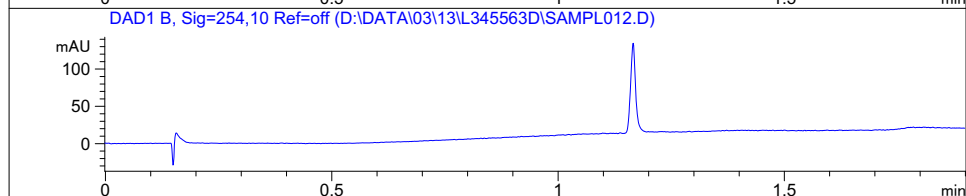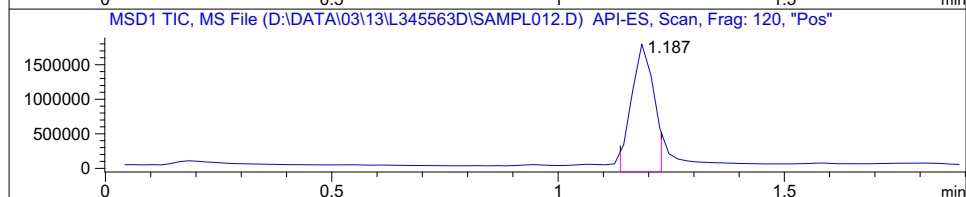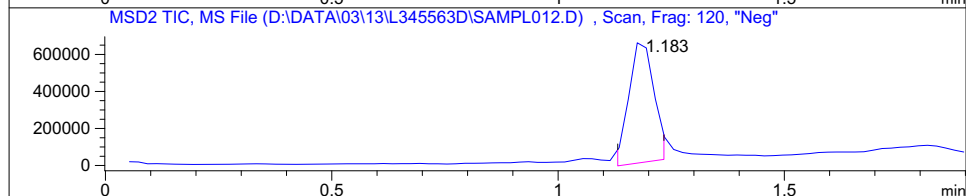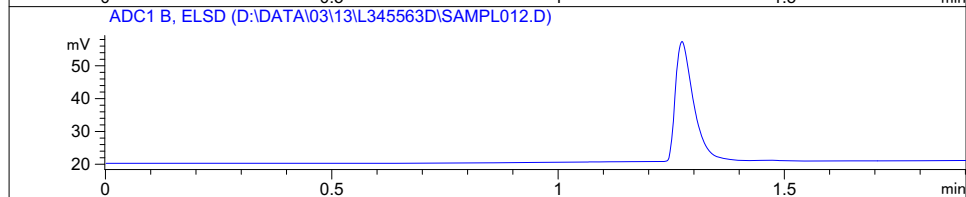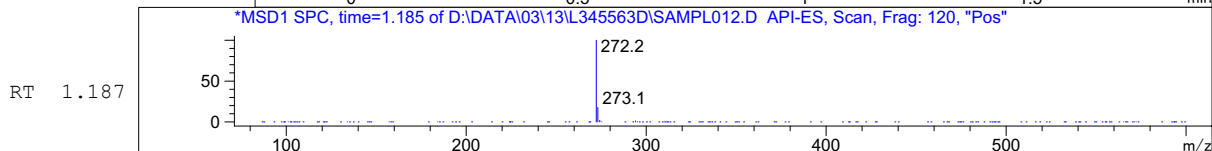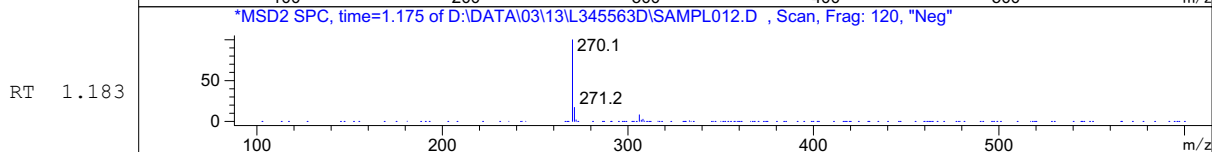

# U853197\$1

MaxPeak: 90.21%  
Ret\_Time: 1.359 min

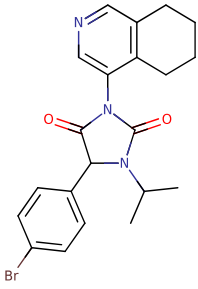

Mol Wt 428.32  
Exact Mass 429.12

| # | Time  | Area% |
|---|-------|-------|
| 1 | 0.936 | 9.79  |
| 2 | 1.359 | 90.21 |

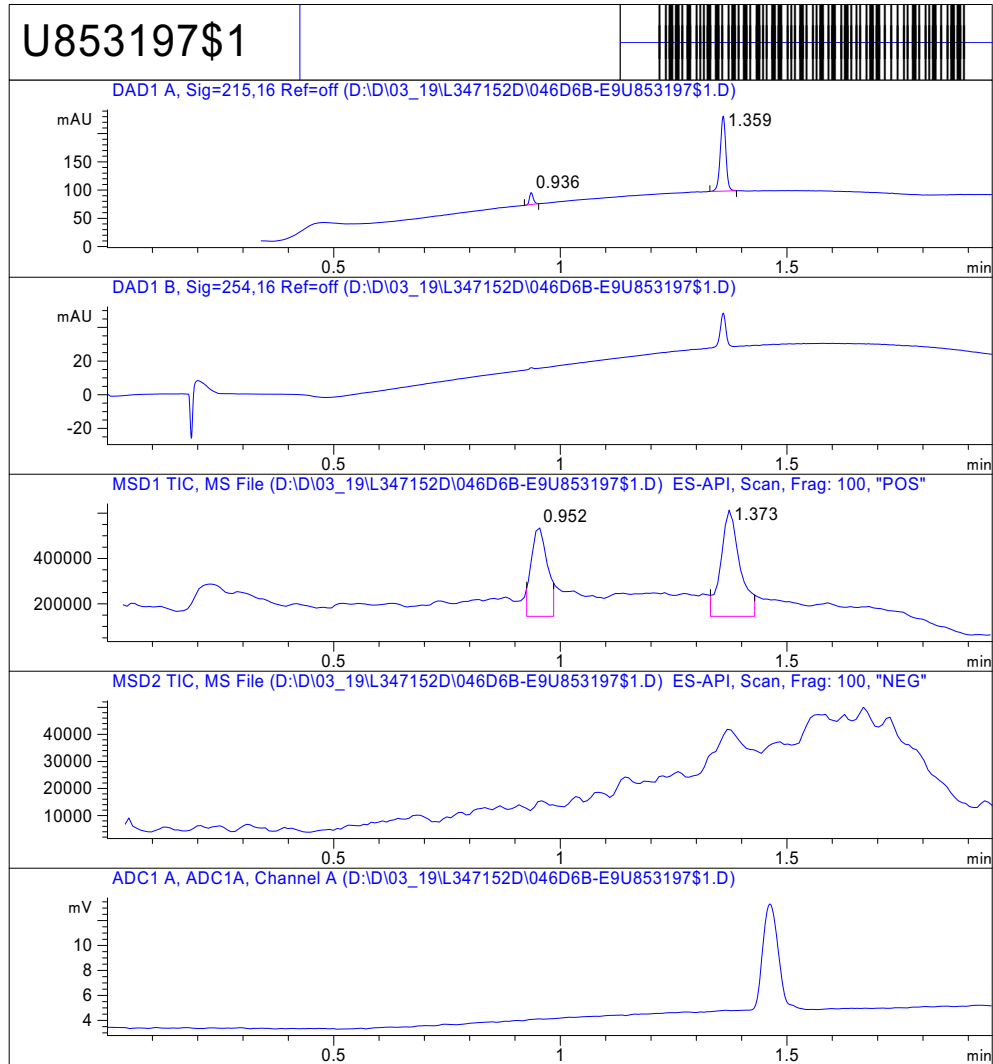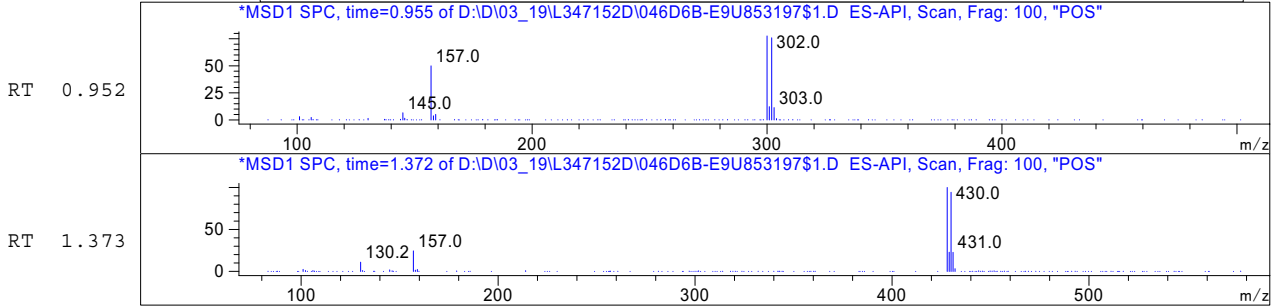

MaxPeak: 100.00%  
Ret\_Time: 1.211 min

U853195\$2

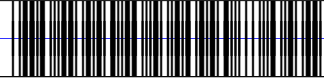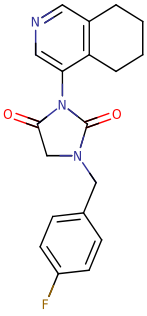

Mol Wt 339.36  
Exact Mass 339.16

| # | Time  | Area%  |
|---|-------|--------|
| 1 | 1.211 | 100.00 |

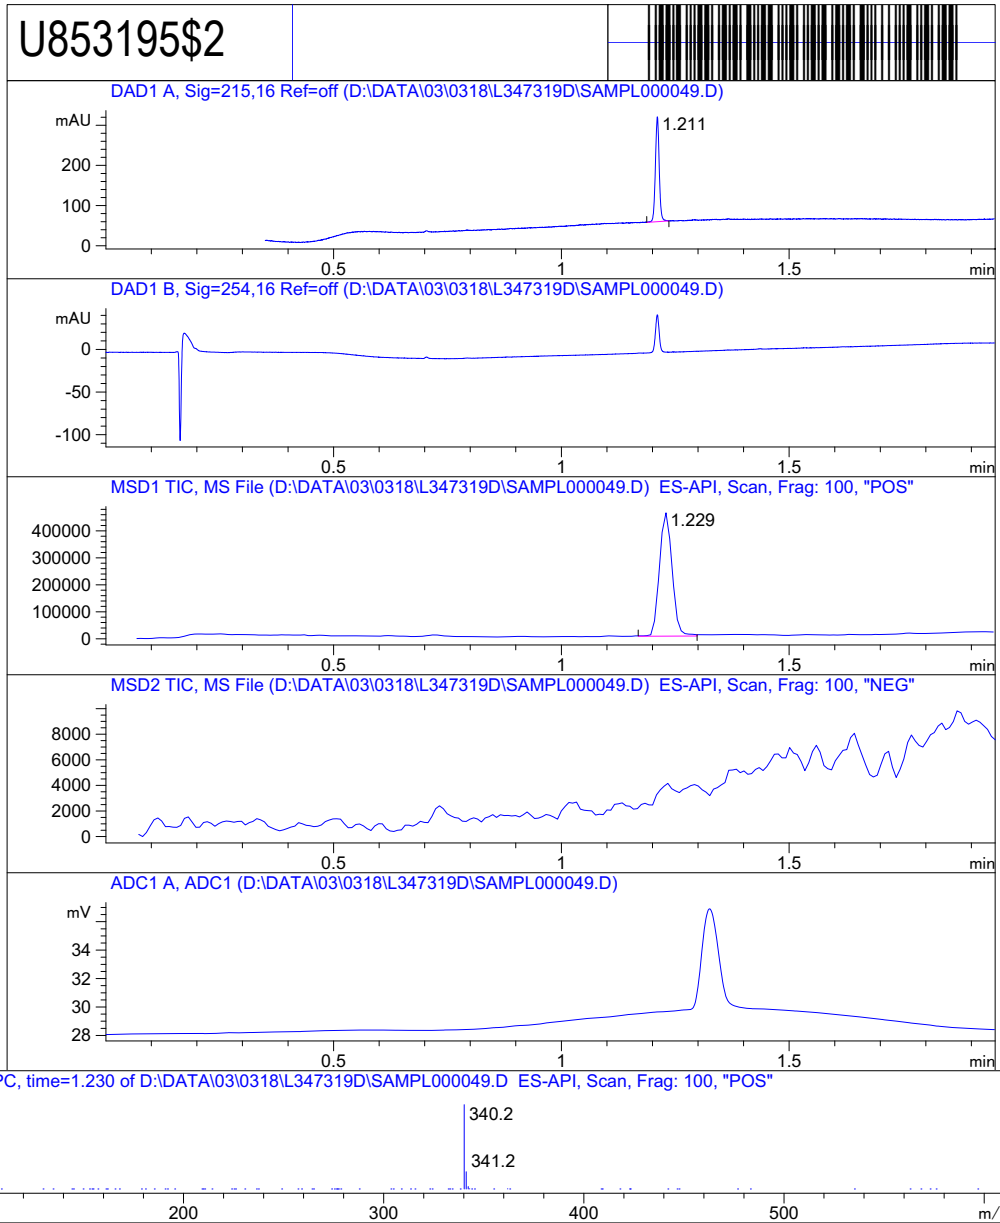

MaxPeak: 98.91%  
Ret\_Time: 1.087 min

# U853206\$2

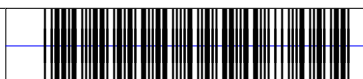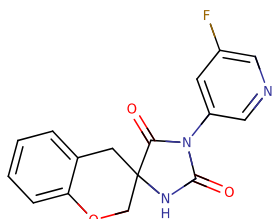

Mol Wt 313.28  
Exact Mass 313.09

| # | Time  | Area% |
|---|-------|-------|
| 1 | 0.961 | 1.09  |
| 2 | 1.087 | 98.91 |

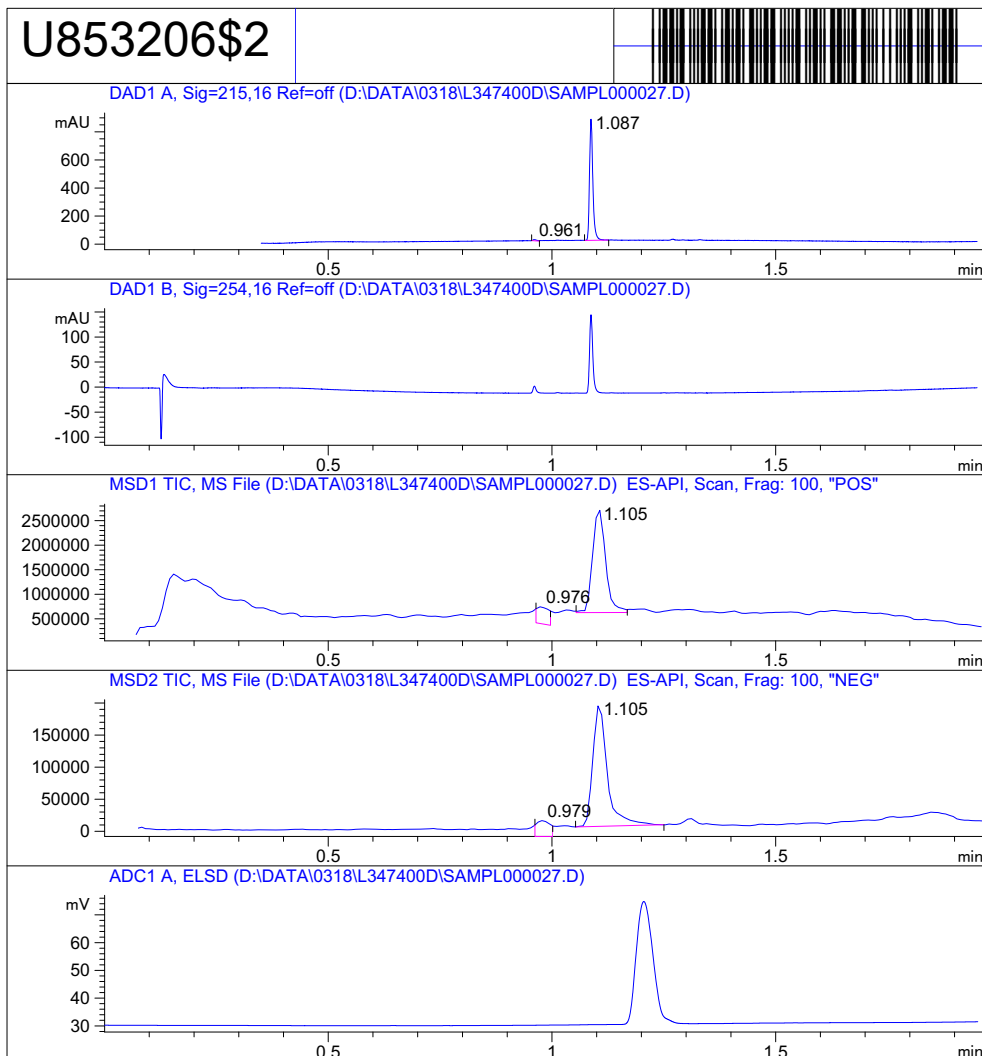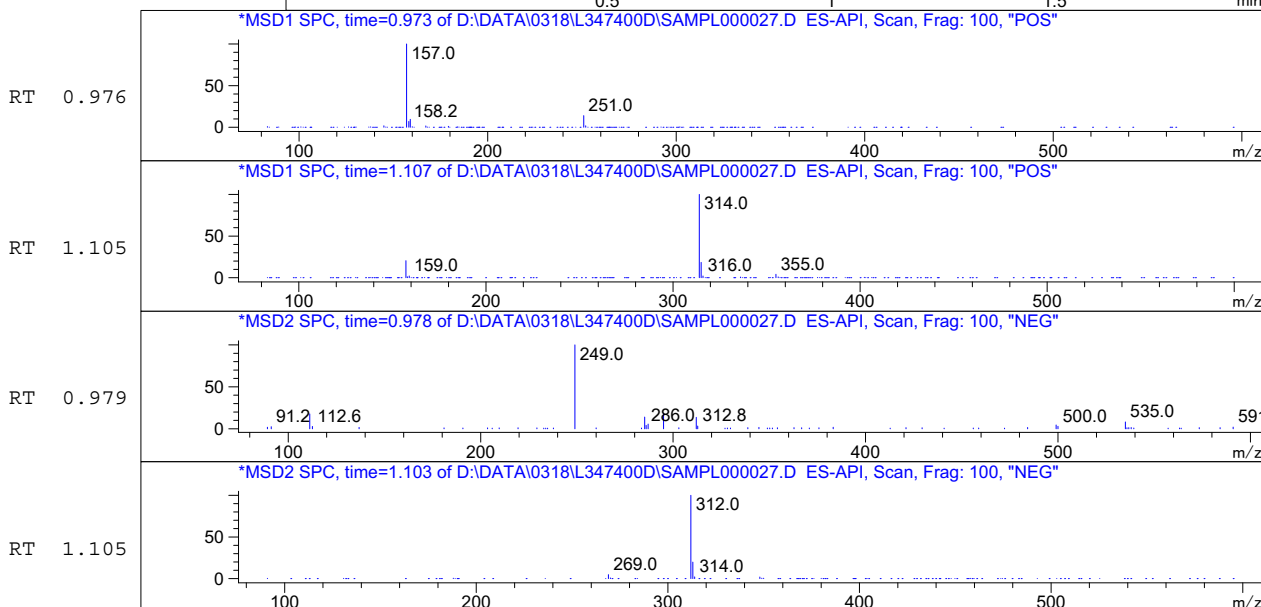

MaxPeak: 100.00%  
Ret\_Time: 1.520 min

7158466344

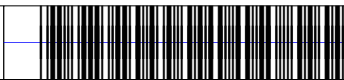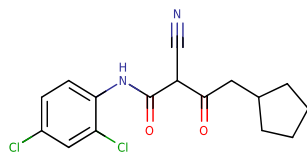

Mol Wt 339.22  
Exact Mass 338.08

| # | Time  | Area%  |
|---|-------|--------|
| 1 | 1.520 | 100.00 |

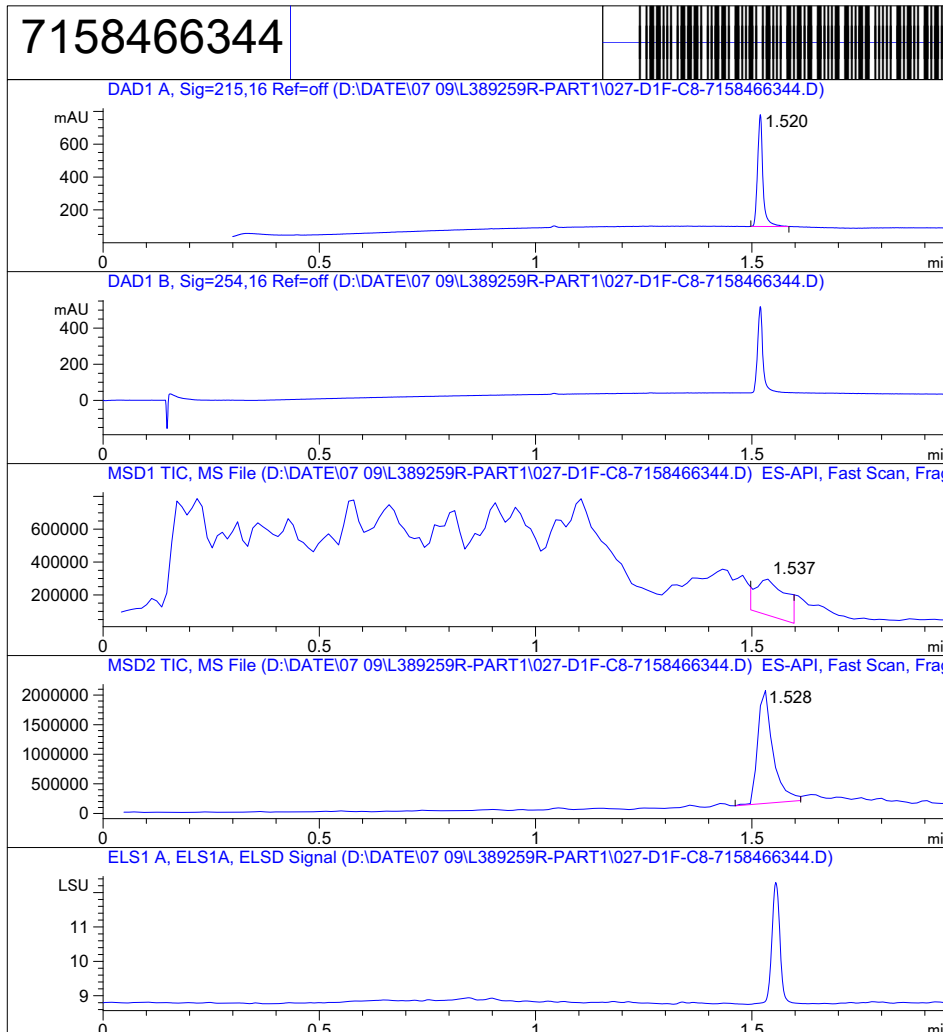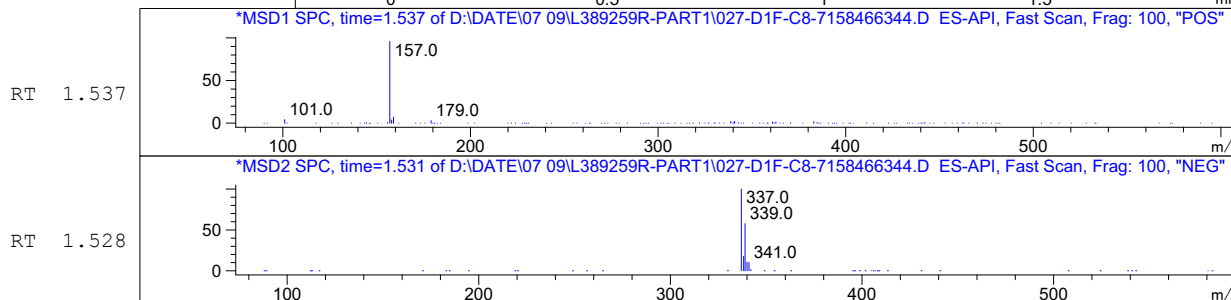

# U853196\$2

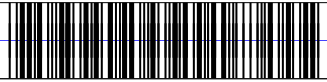

MaxPeak: 98.16%  
Ret\_Time: 1.052 min

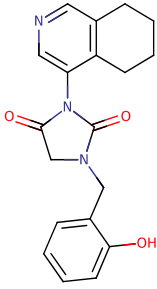

Mol Wt 337.37  
Exact Mass 337.16

| # | Time  | Area% |
|---|-------|-------|
| 1 | 0.725 | 1.84  |
| 2 | 1.052 | 98.16 |

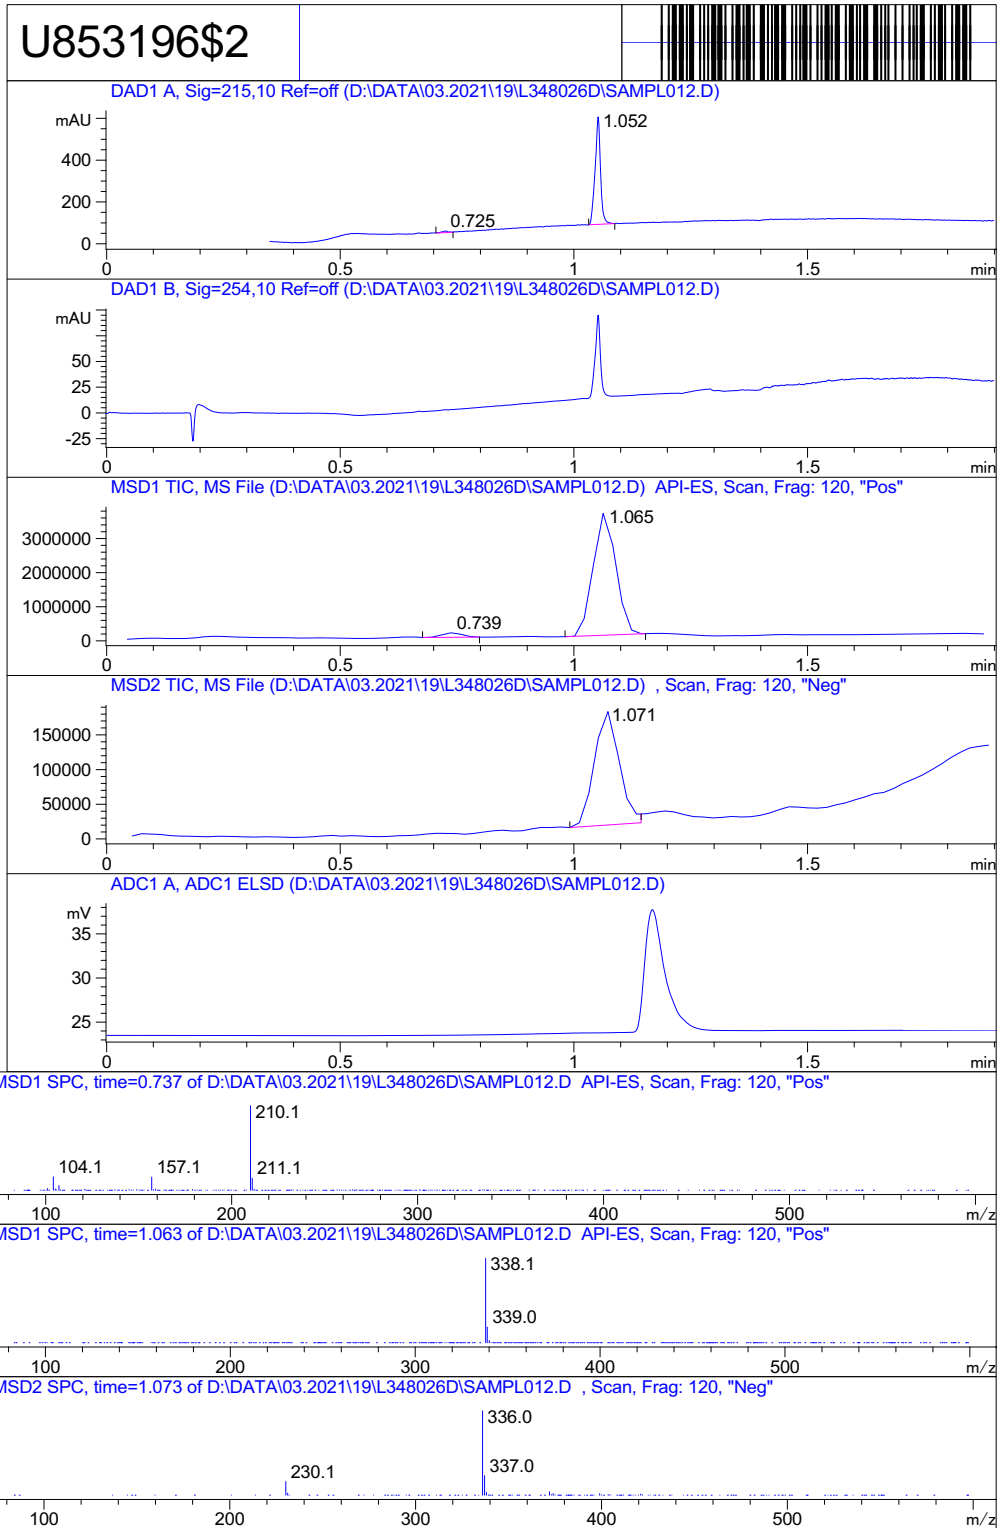

Inj.Date 3/19/2021

CH

P2-B-03

-VL-

Acq. Method C:\HPCHEM\ ->

->

Z4929616577\_



U812291\$23

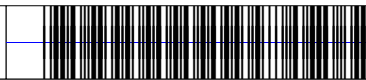

MaxPeak: 92.69%  
Ret\_Time: 1.096 min

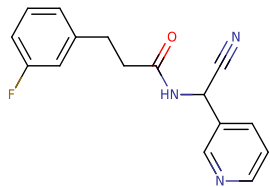

Mol Wt 283.3  
Exact Mass 283.13

| # | Time  | Area% |
|---|-------|-------|
| 1 | 1.096 | 92.69 |
| 2 | 1.183 | 7.31  |

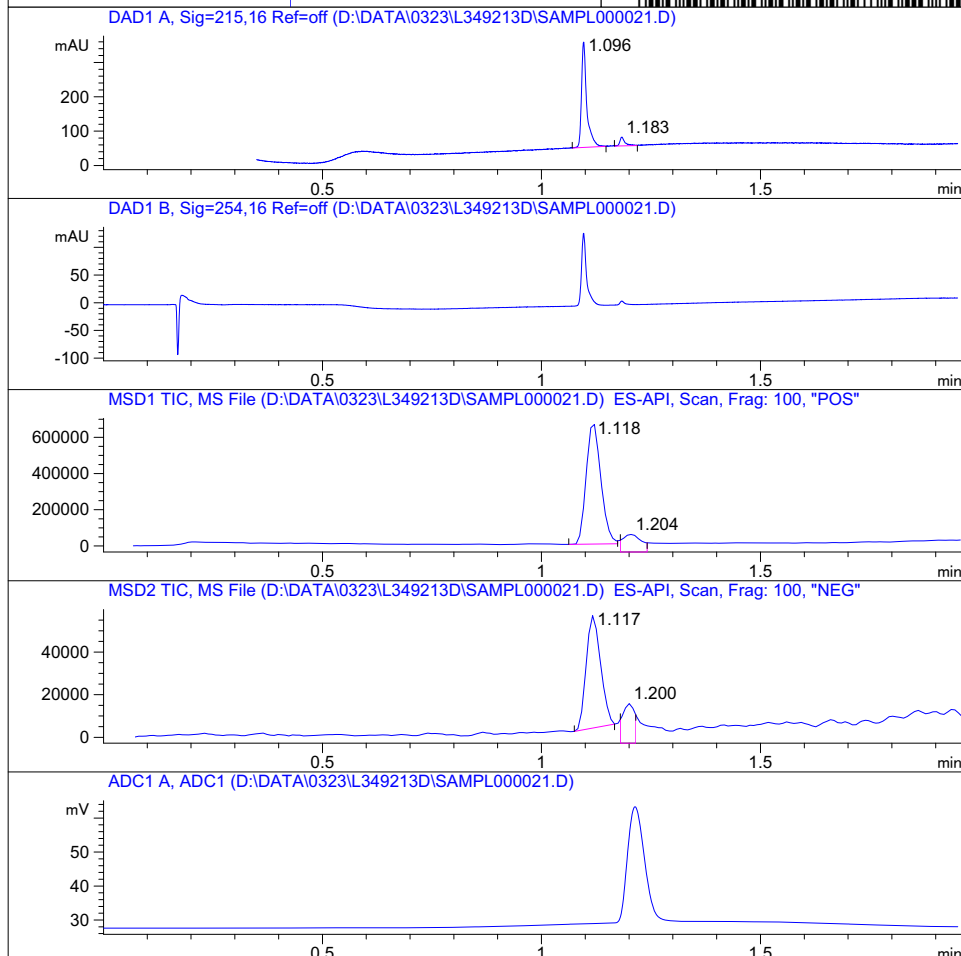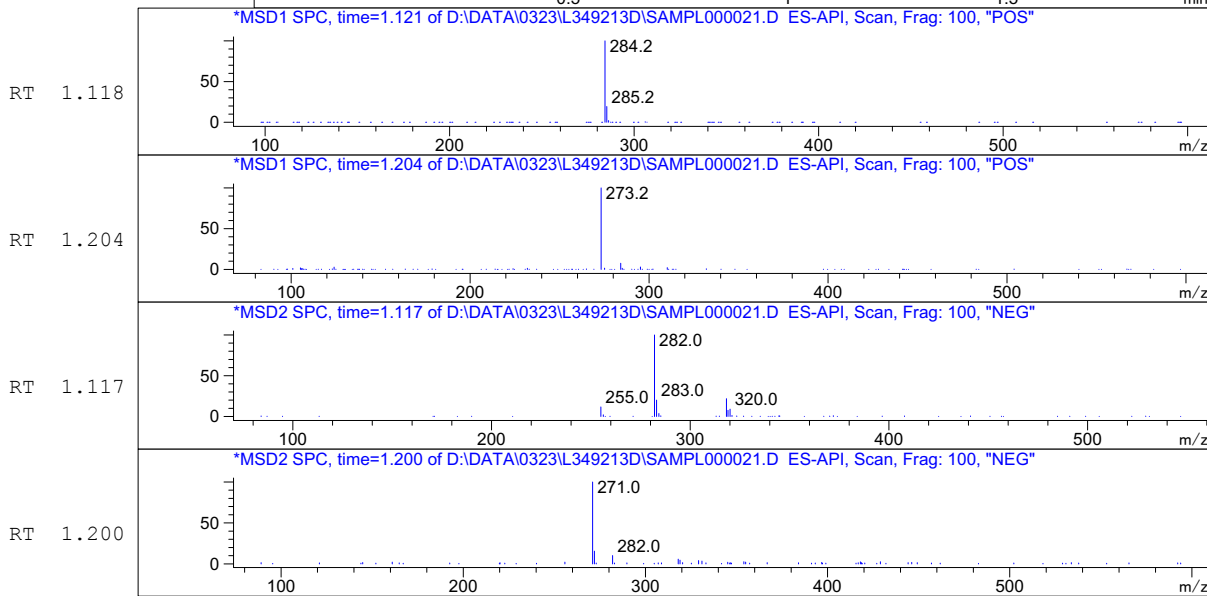

U853208\$2

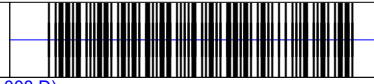

MaxPeak: 95.50%  
Ret\_Time: 1.473 min

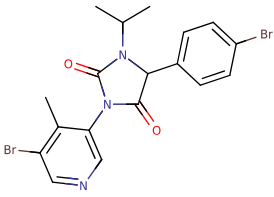

Mol Wt 467.15  
Exact Mass 466.99

| # | Time  | Area% |
|---|-------|-------|
| 1 | 1.452 | 4.50  |
| 2 | 1.473 | 95.50 |

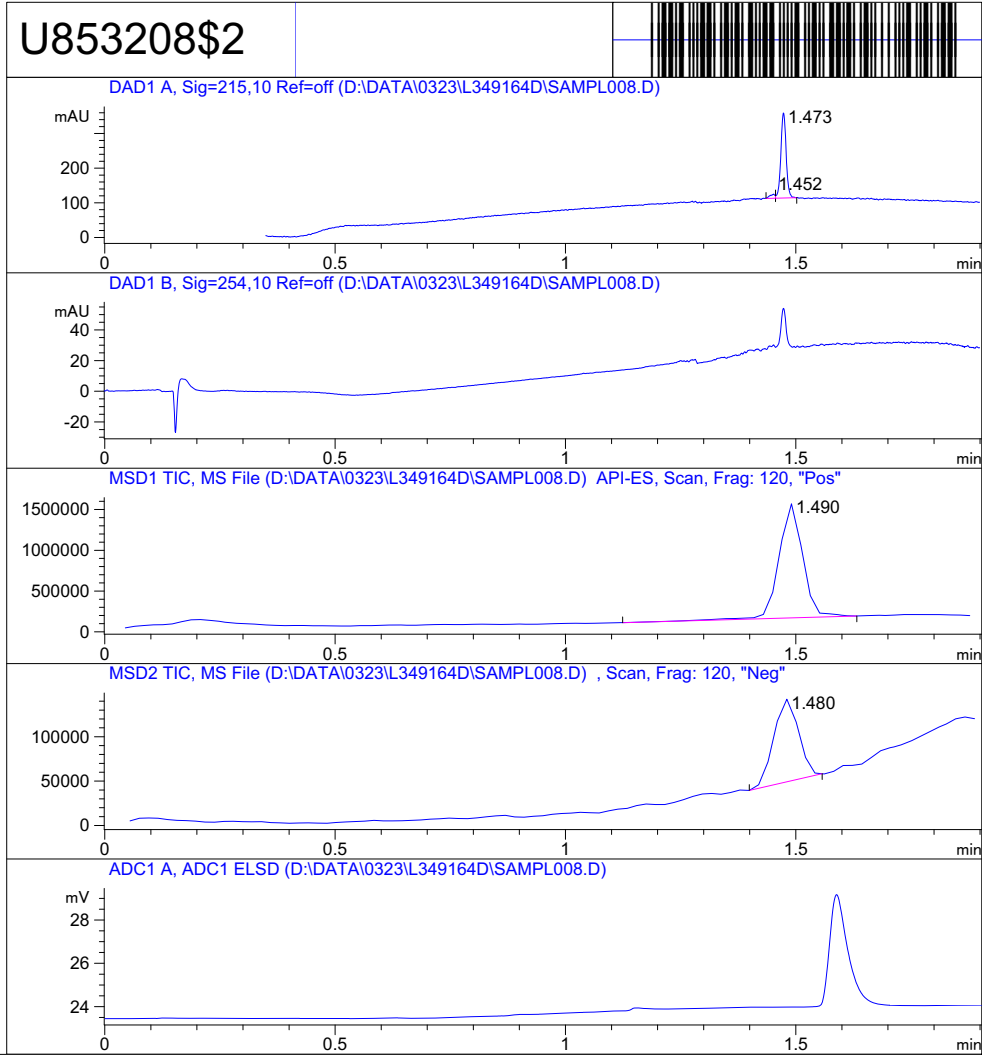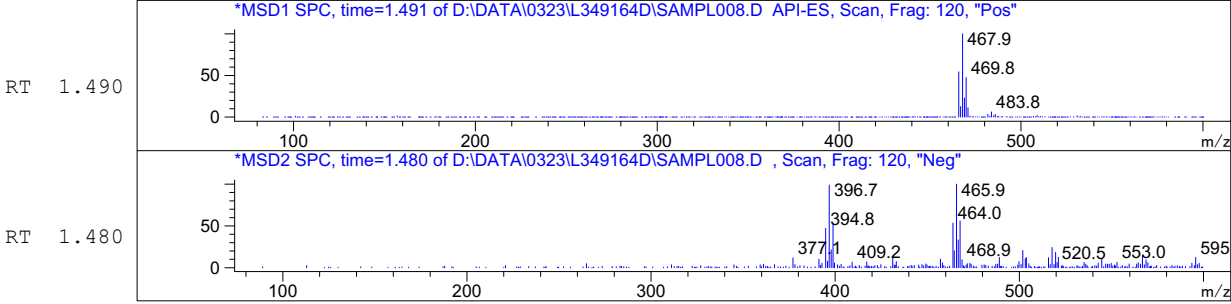

Inj.Date 3/23/2021

OA

-VL-

Acq. Method C:\HPCHEM\ -> ->

Z4927215427\_

MaxPeak: 83.37%  
Ret\_Time: 1.485 min

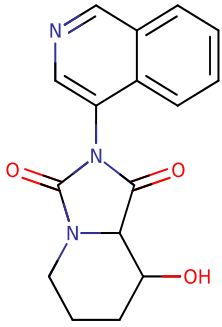

Mol Wt 297.31  
Exact Mass 297.12

| # | Time  | Area% |
|---|-------|-------|
| 1 | 1.485 | 83.37 |
| 2 | 1.541 | 11.66 |
| 3 | 2.085 | 4.97  |

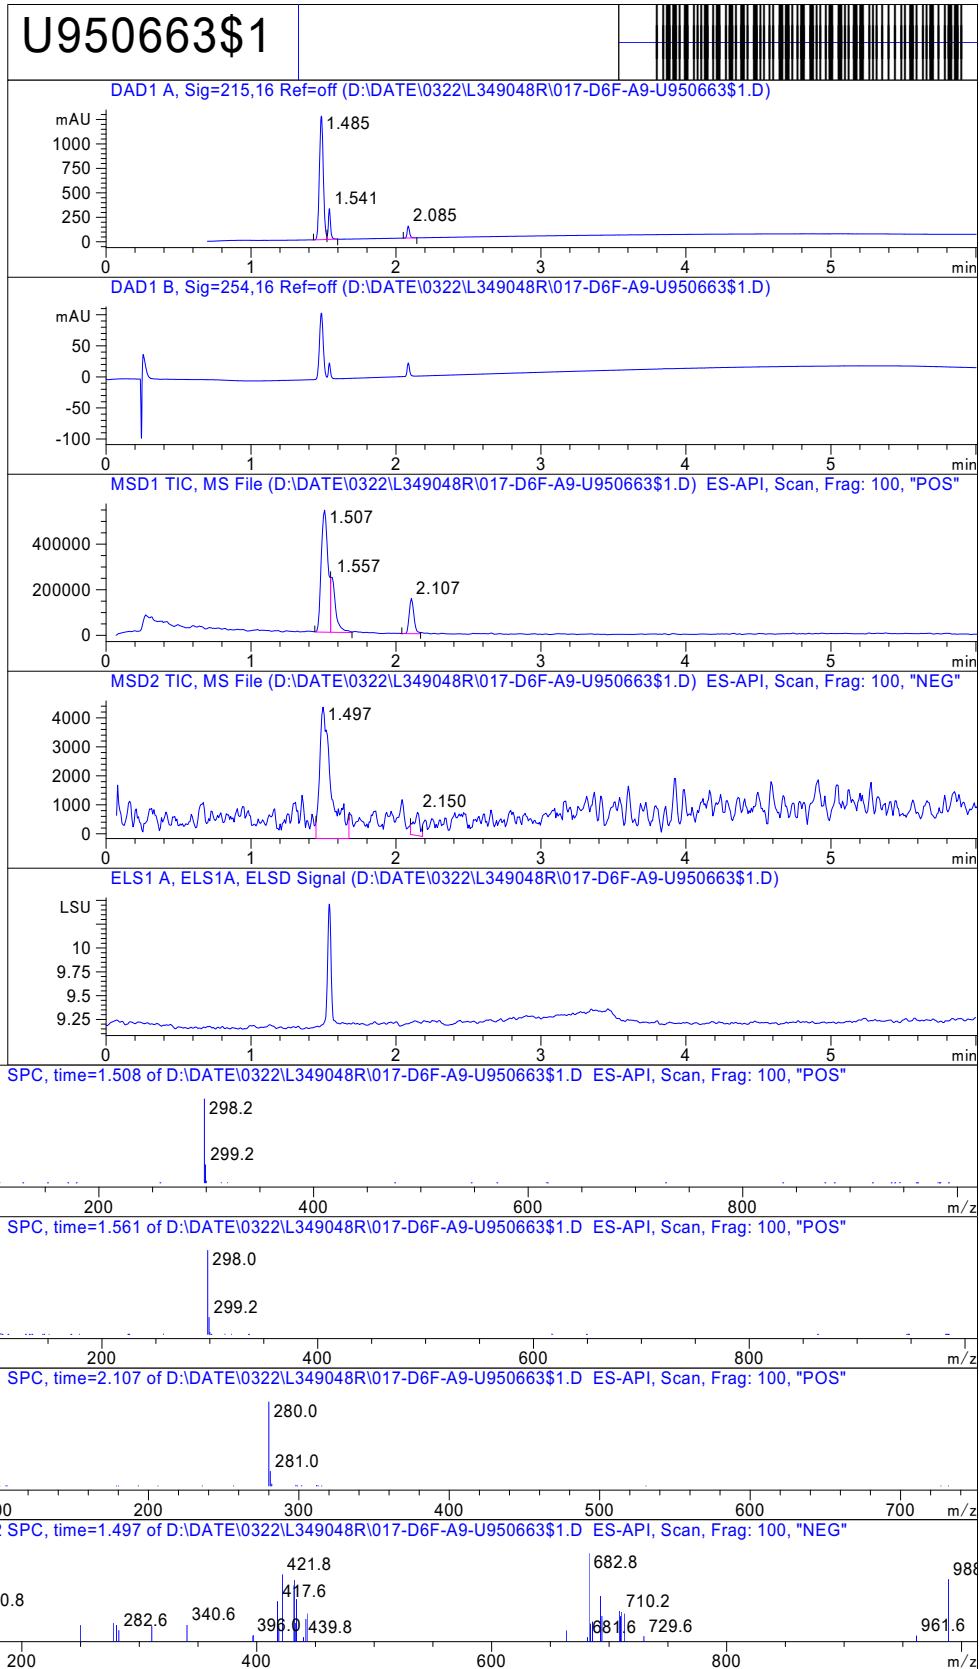

Inj.Date 3/22/2021

E

13

Acq. Method C:\Chem32\> >

Z4929616088\_

MaxPeak: 100.00%  
Ret\_Time: 3.550 min

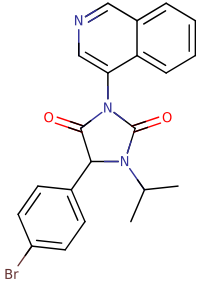

Mol Wt 424.29  
Exact Mass 425.08

| # | Time  | Area%  |
|---|-------|--------|
| 1 | 3.550 | 100.00 |

U950662\$2

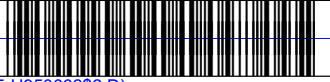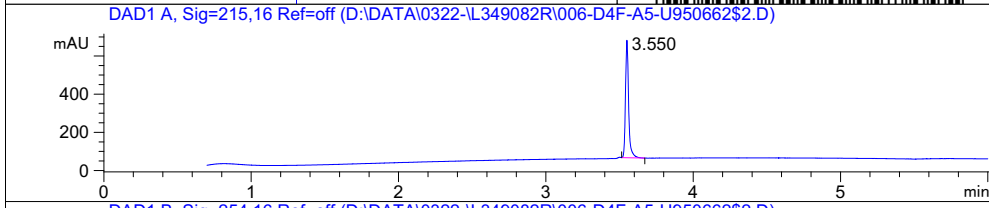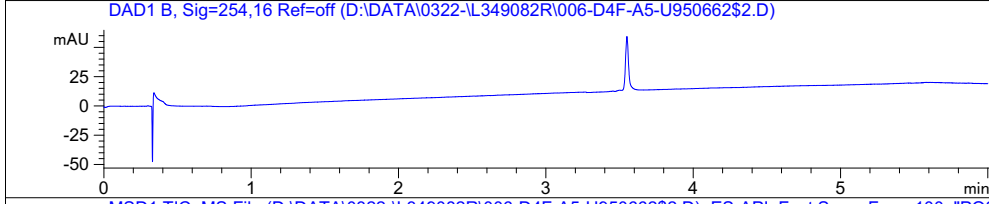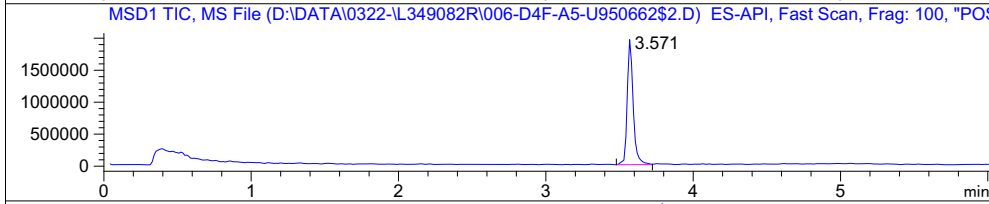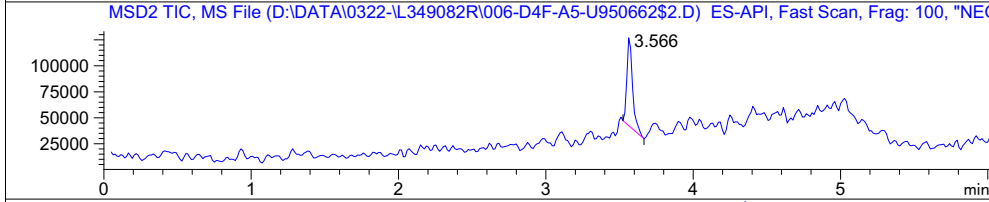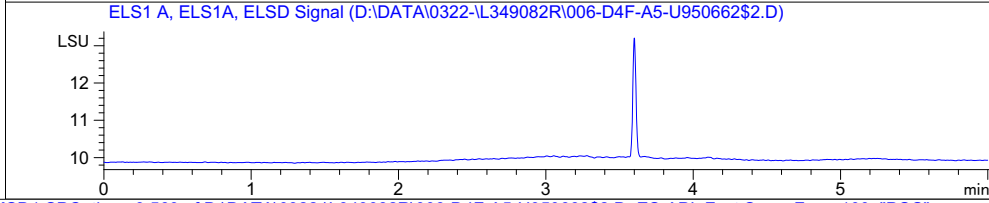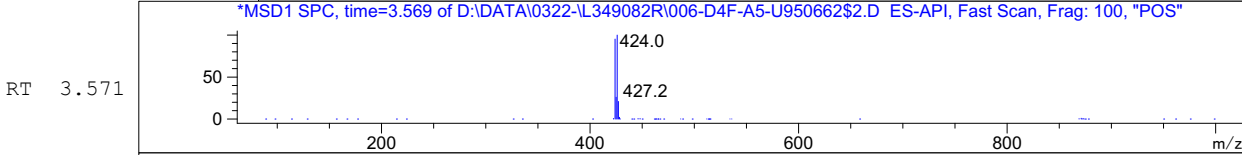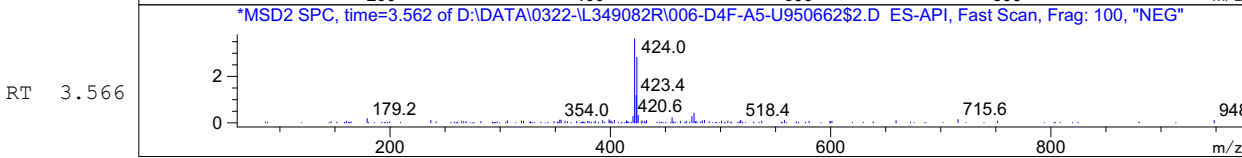

Inj.Date 3/22/2021

OA

Acq. Method C:\Users\ -> ->

Z4925123630\_

MaxPeak: 100.00%  
Ret\_Time: 0.937 min

U689907\$2

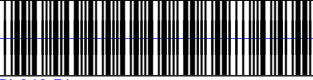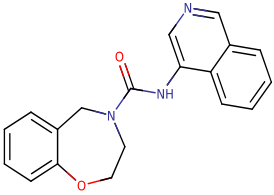

Mol Wt 319.36  
Exact Mass 319.15

| # | Time  | Area%  |
|---|-------|--------|
| 1 | 0.937 | 100.00 |

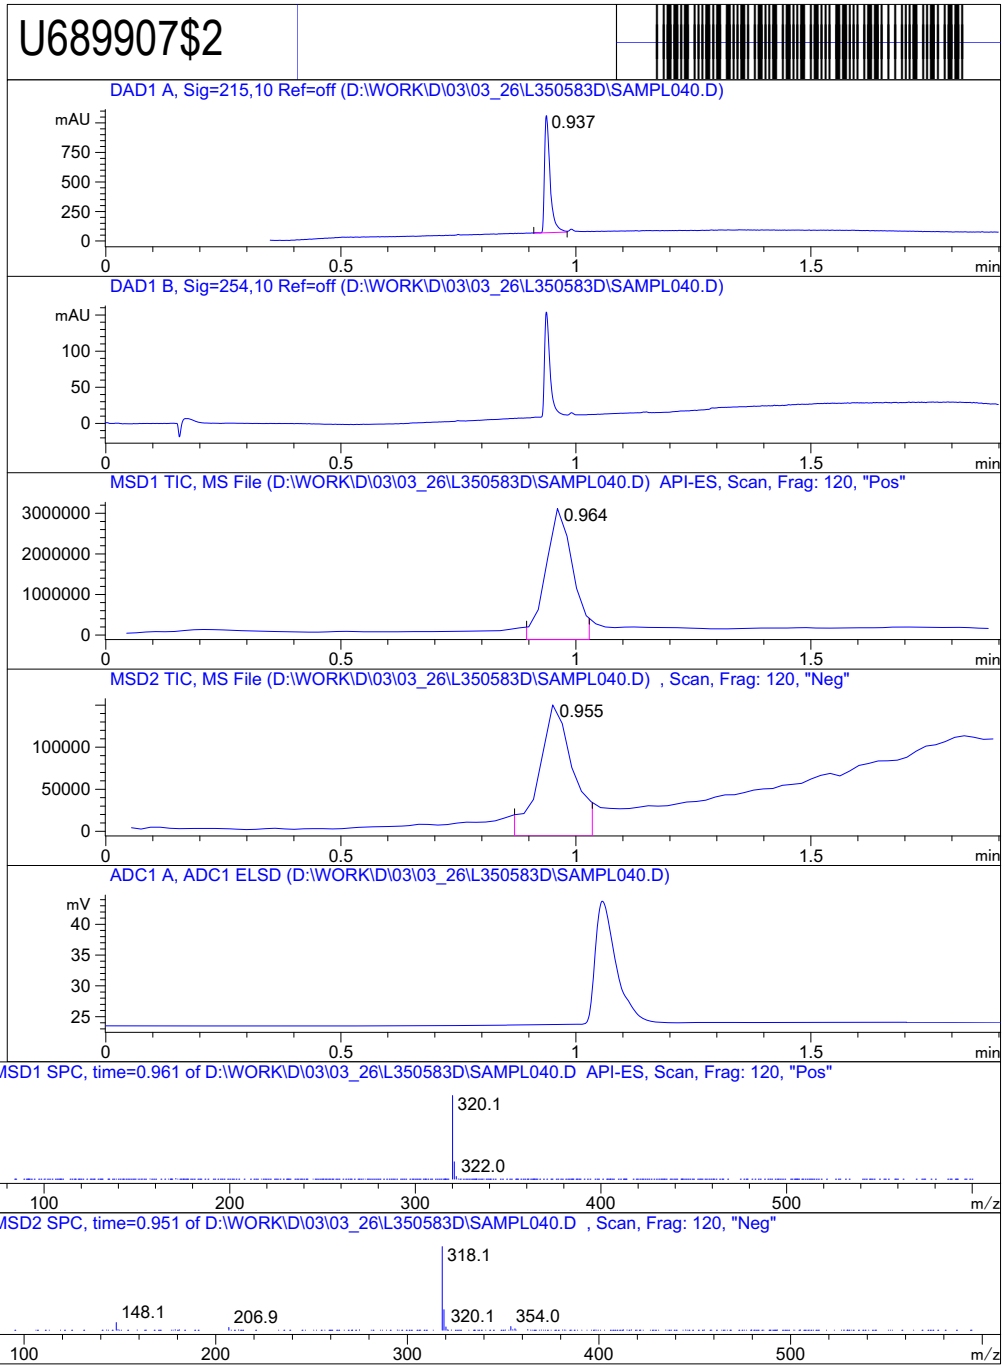

RT 0.964

RT 0.955

Inj.Date 3/26/2021

K

-VL-

Acq. Method C:\HPCHEM\ -> ->

Z1531604940\_

MaxPeak: 100.00%  
Ret\_Time: 0.968 min

U693154\$1

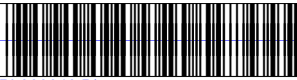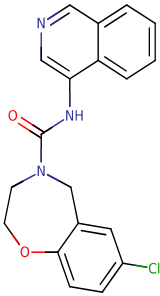

Mol Wt 353.8  
Exact Mass 353.11

| # | Time  | Area%  |
|---|-------|--------|
| 1 | 0.968 | 100.00 |

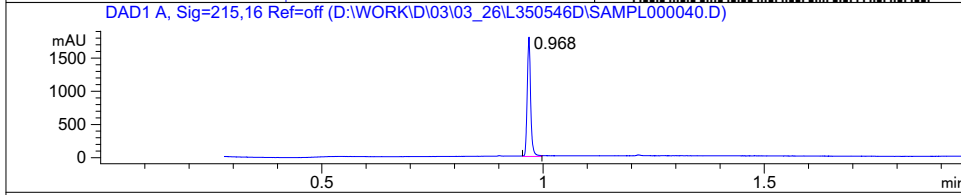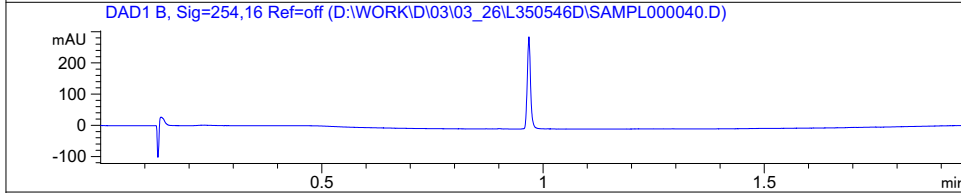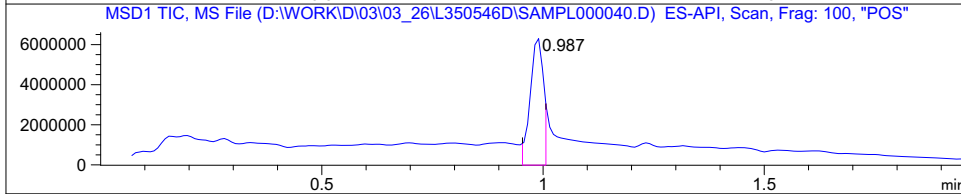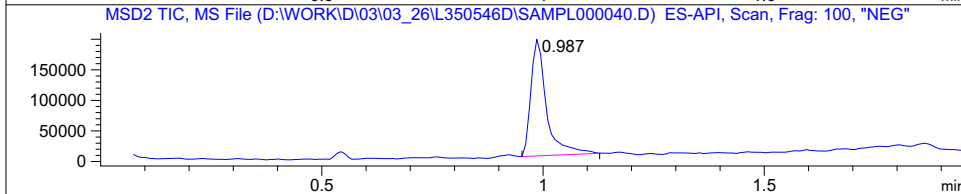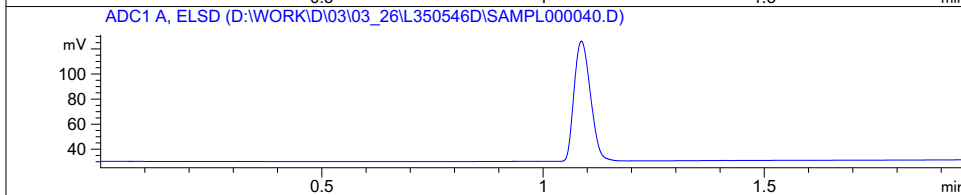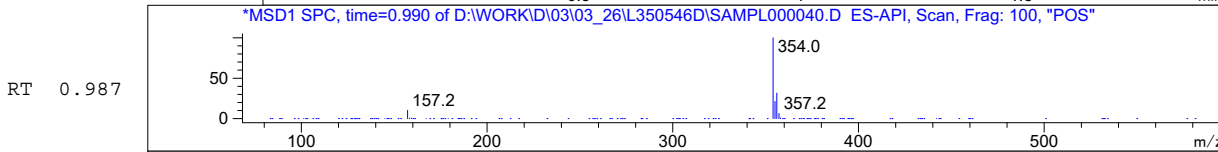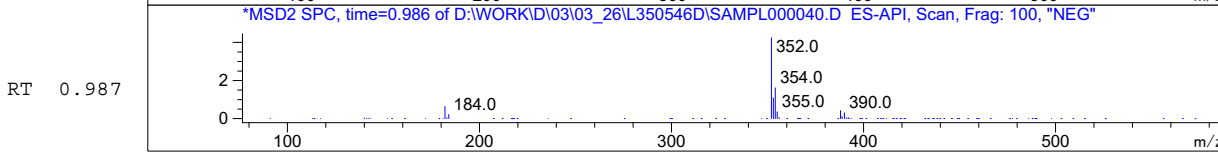

MaxPeak: 98.19%  
Ret\_Time: 1.054 min

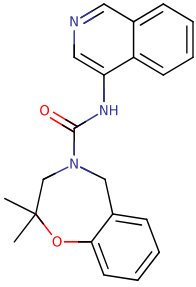

Mol Wt 347.41  
Exact Mass 347.19

| # | Time  | Area% |
|---|-------|-------|
| 1 | 0.681 | 1.81  |
| 2 | 1.054 | 98.19 |

U689906\$3

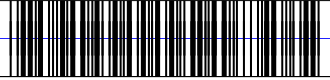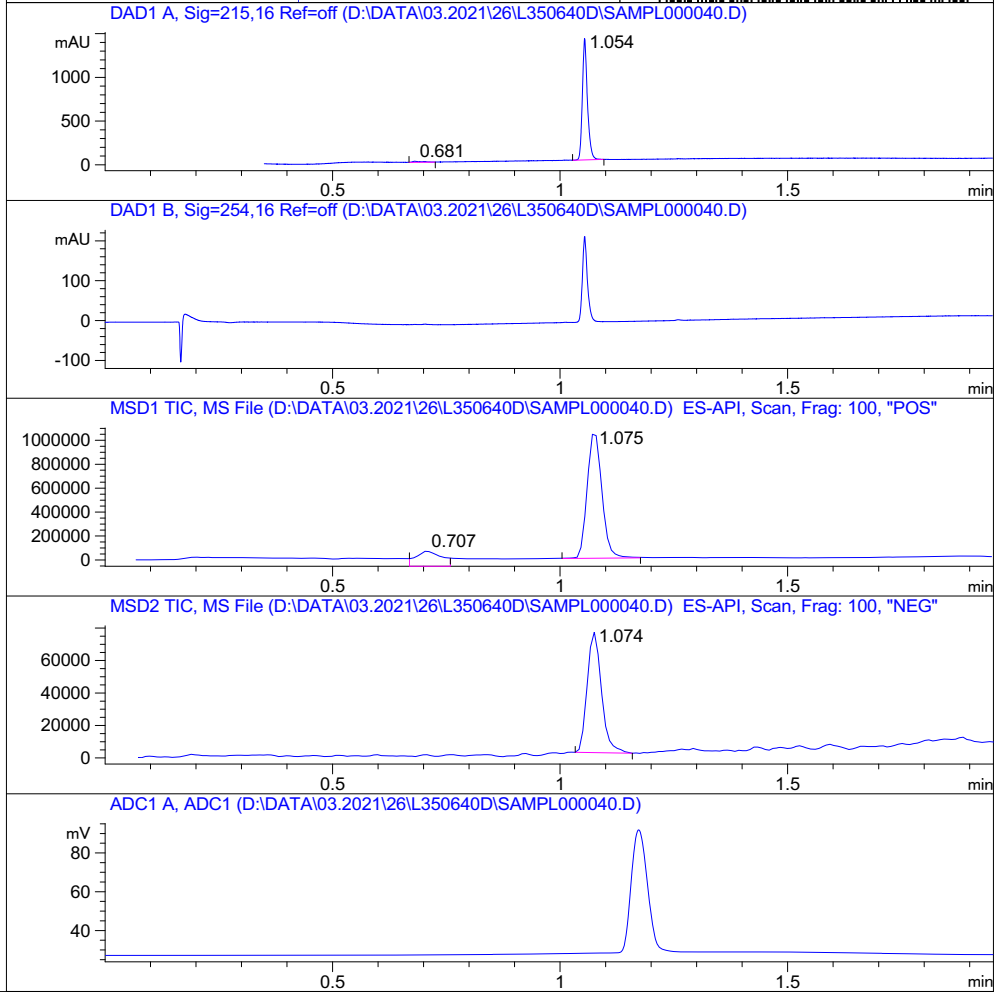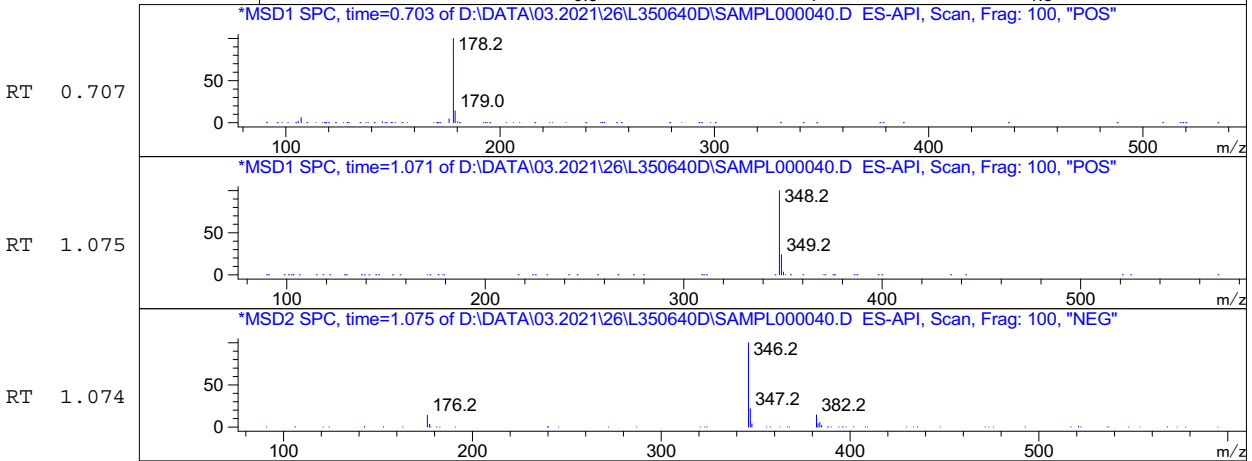

MaxPeak: 100.00%  
Ret\_Time: 0.990 min

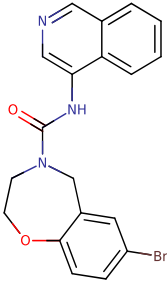

Mol Wt 398.25  
Exact Mass 397.06

| # | Time  | Area%  |
|---|-------|--------|
| 1 | 0.990 | 100.00 |

U689908\$1

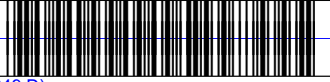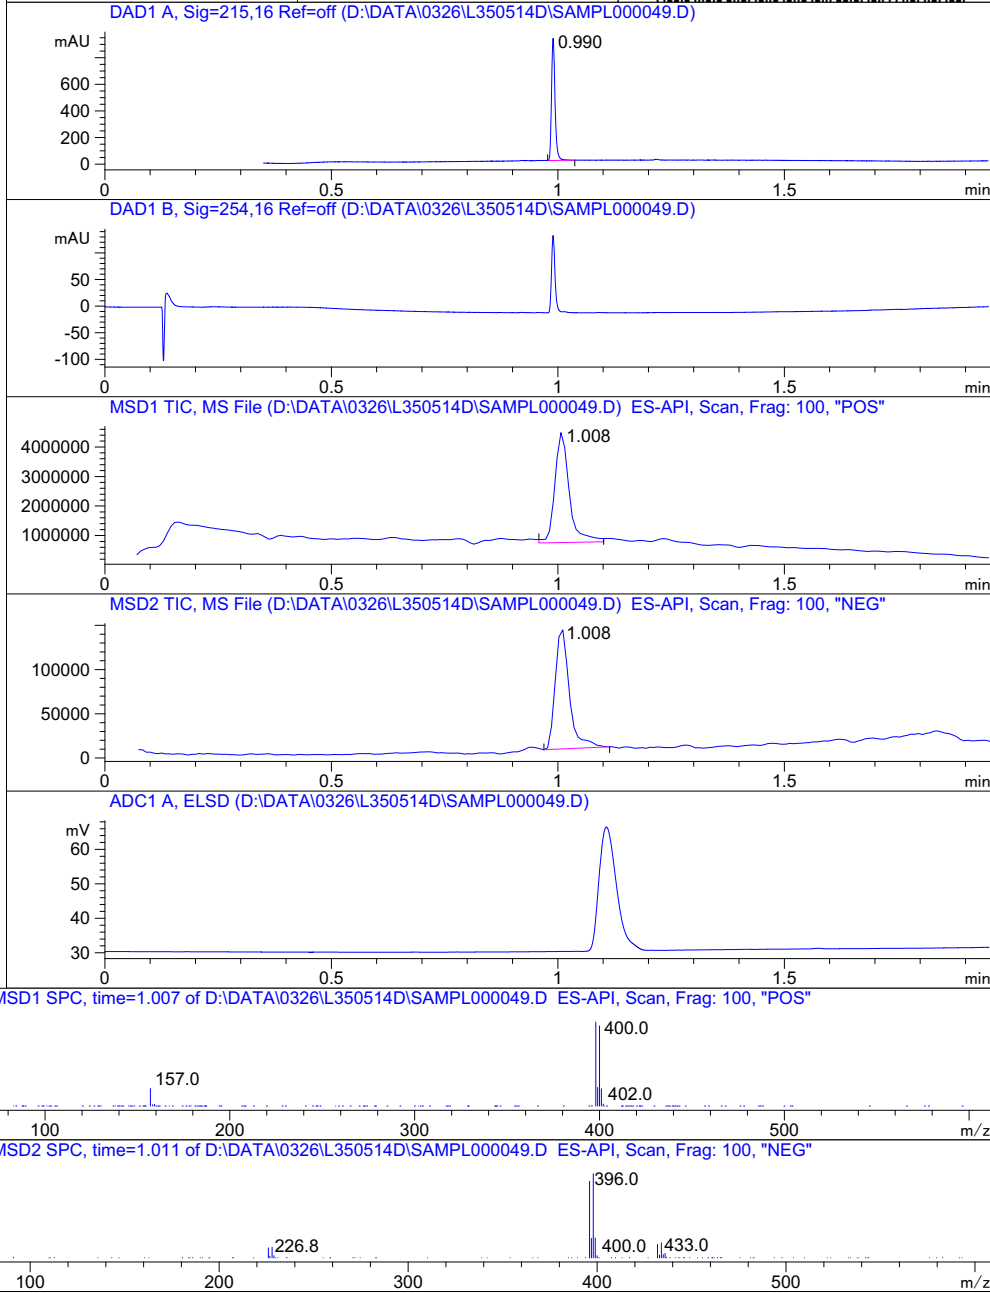



MaxPeak: 100.00%  
Ret\_Time: 1.100 min

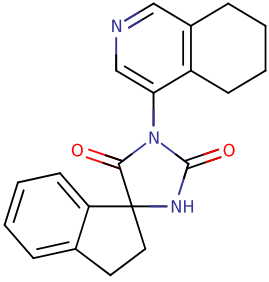

Mol Wt 333.38  
Exact Mass 333.17

| # | Time  | Area%  |
|---|-------|--------|
| 1 | 1.100 | 100.00 |

U963858\$1

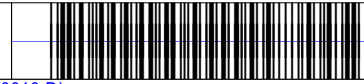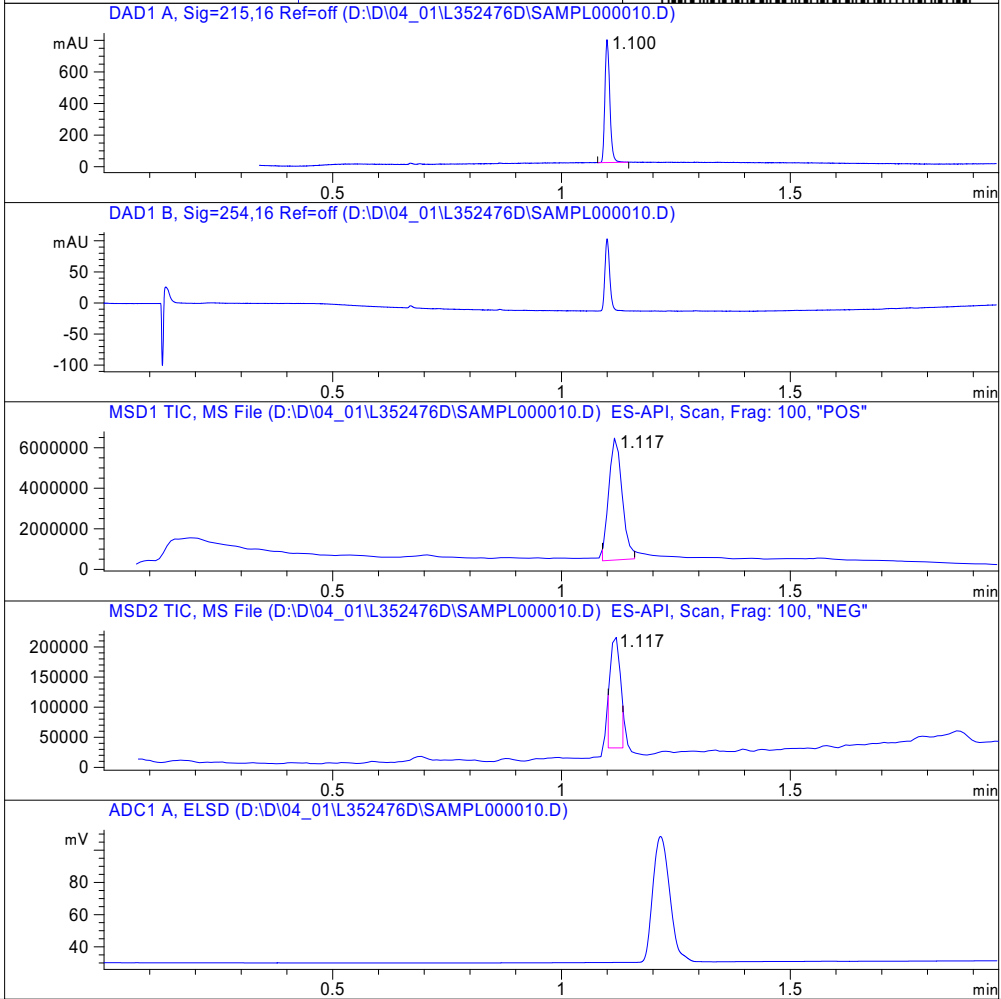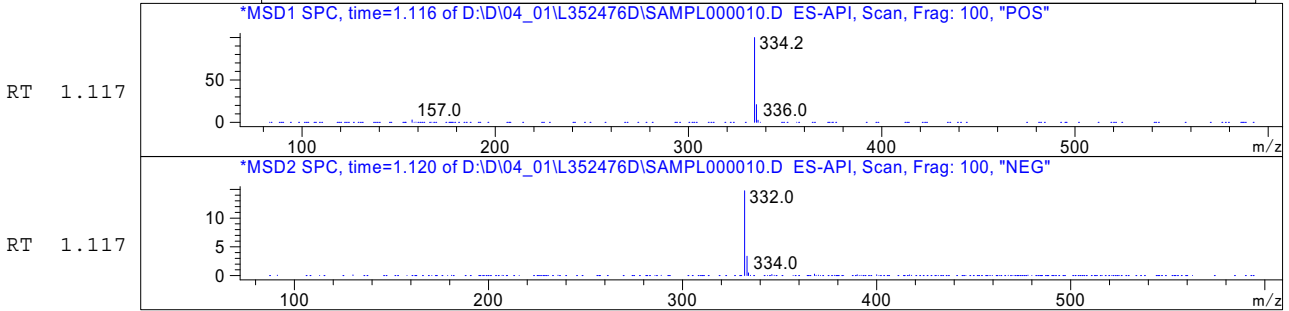

MaxPeak: 100.00%  
Ret\_Time: 1.332 min

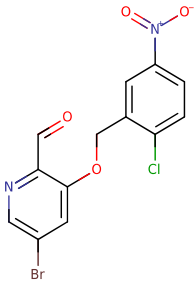

Mol Wt 371.57  
Exact Mass 371.93

| # | Time  | Area%  |
|---|-------|--------|
| 1 | 1.332 | 100.00 |

U920096\$2

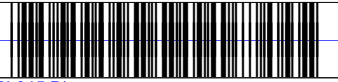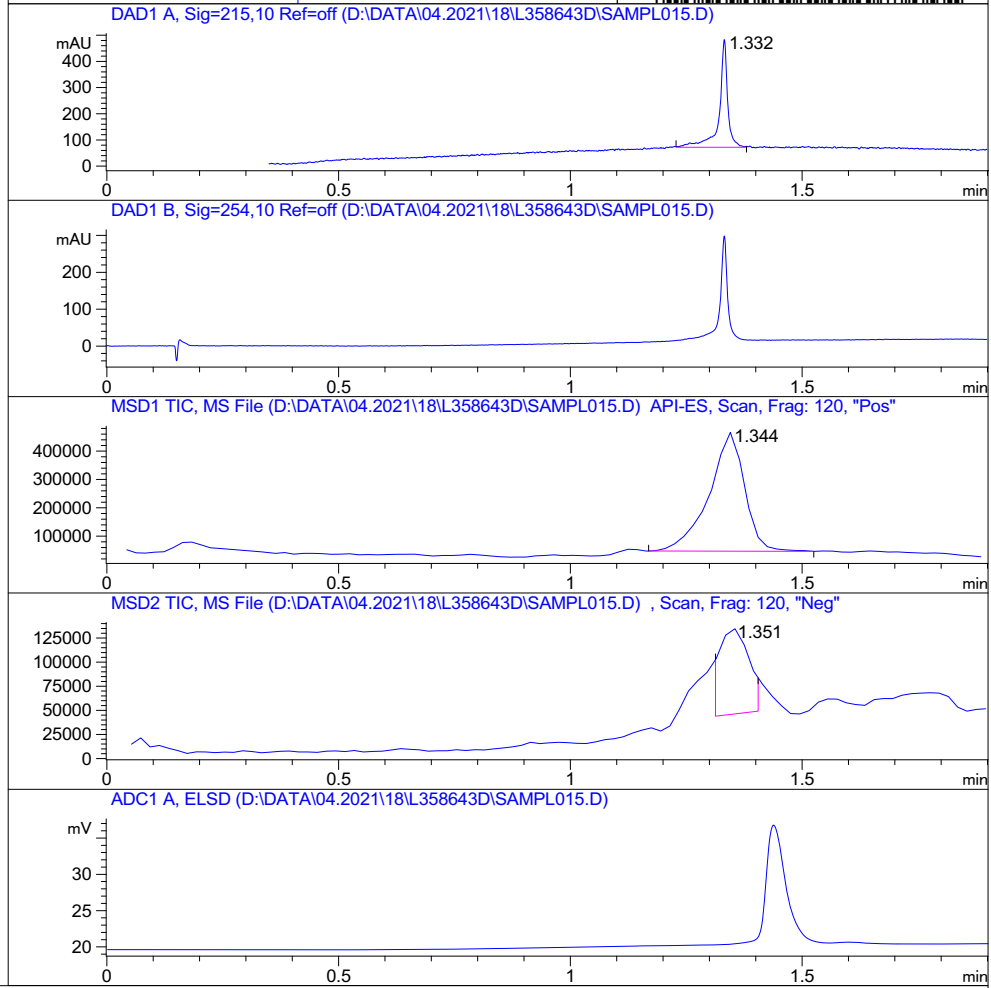

RT 1.344

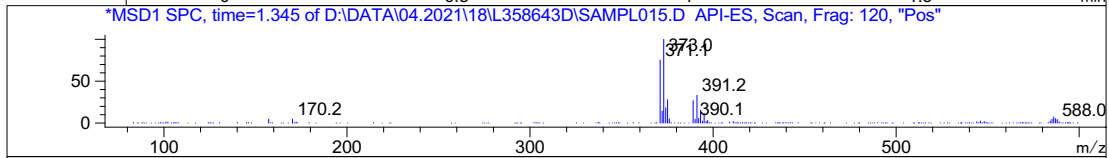

RT 1.351

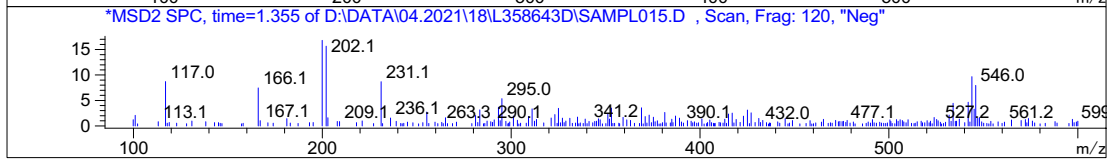

Inj.Date 4/18/2021

CH

P2-B-06

-SL-

Acq. Method C:\HPCHEM\--> -->

Z4954569105\_

MaxPeak: 100.00%  
Ret\_Time: 1.465 min

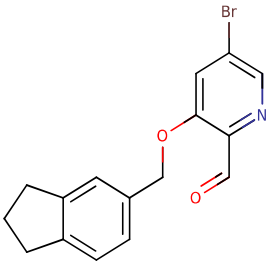

Mol Wt 332.19  
Exact Mass 331.04

| # | Time  | Area%  |
|---|-------|--------|
| 1 | 1.465 | 100.00 |

# U920109\$3

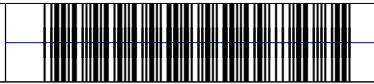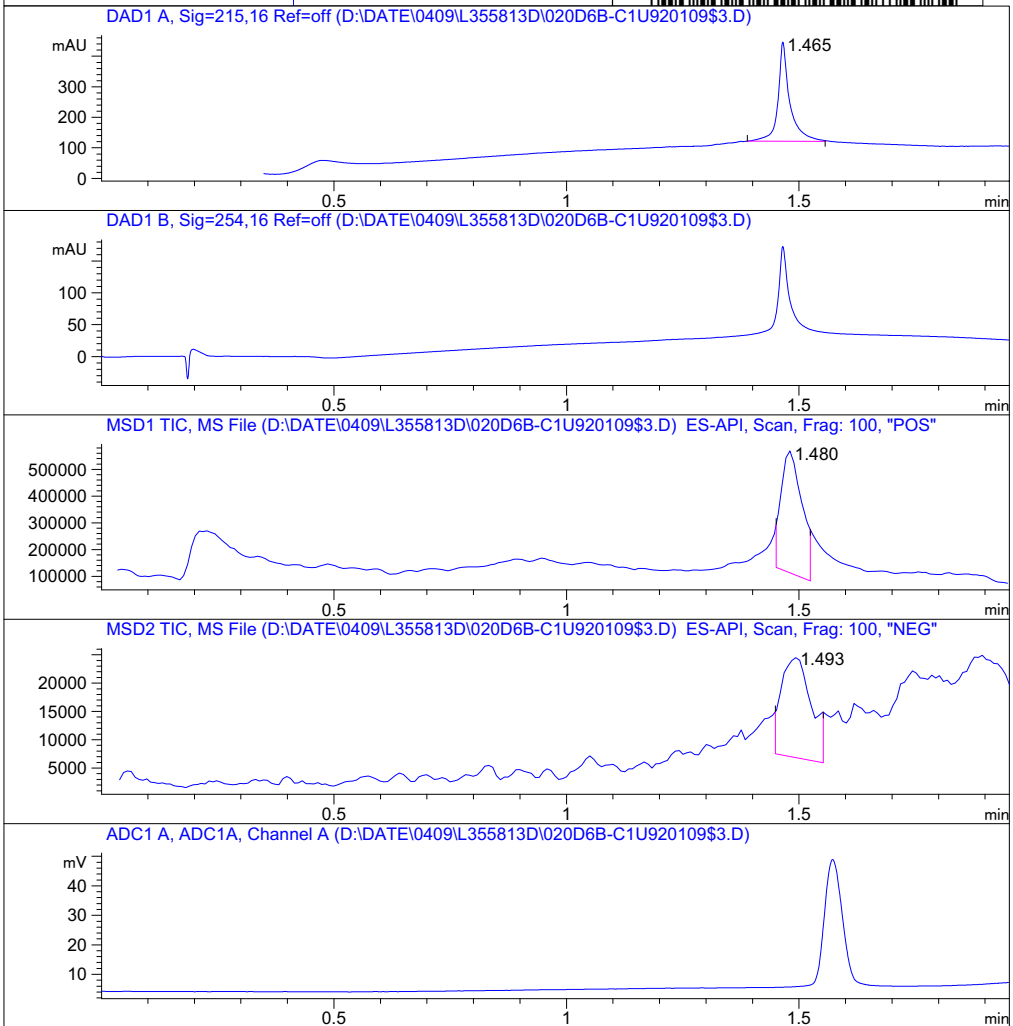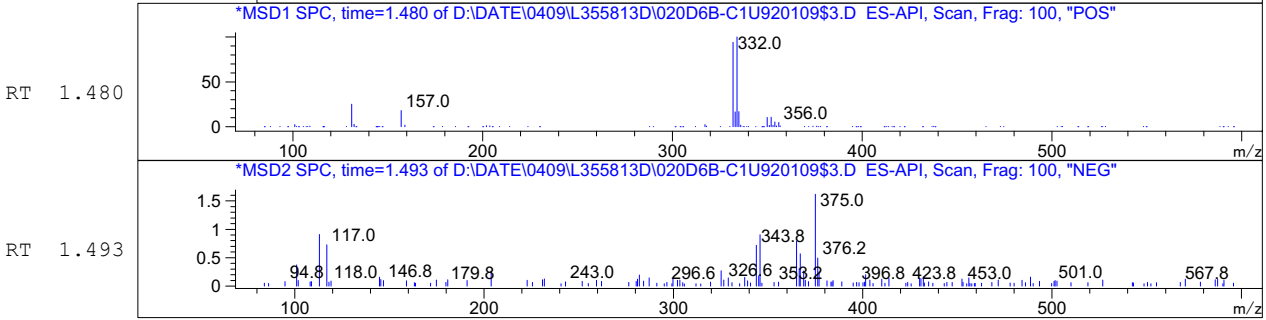

MaxPeak: 98.52%  
Ret\_Time: 0.661 min

V005787\$4

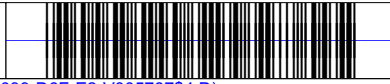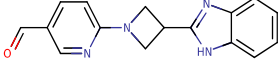

Mol Wt 278.31  
Exact Mass 278.13

| # | Time  | Area% |
|---|-------|-------|
| 1 | 0.661 | 98.52 |
| 2 | 0.703 | 1.48  |

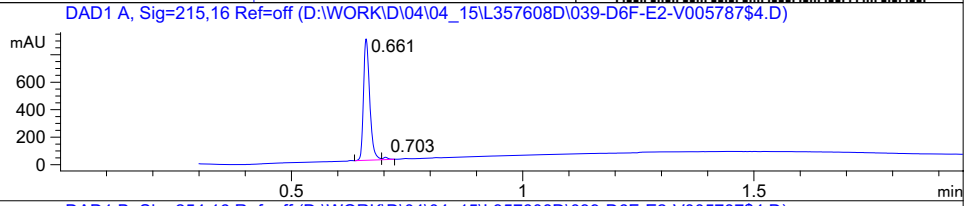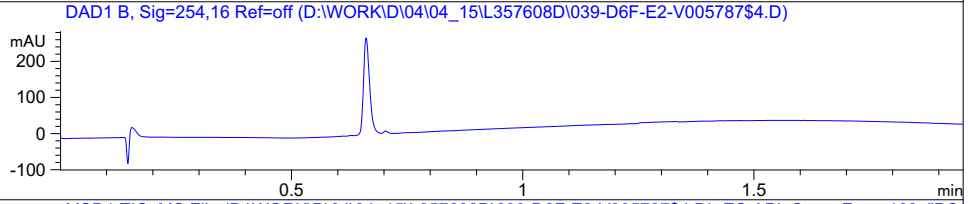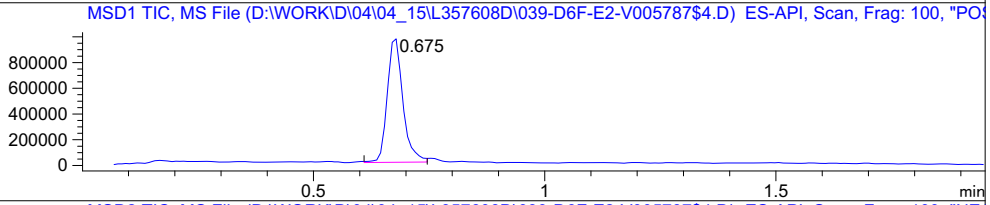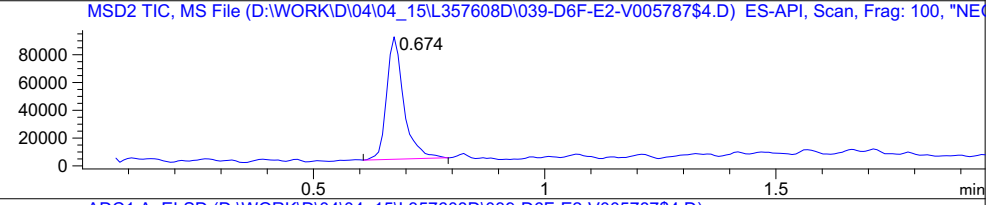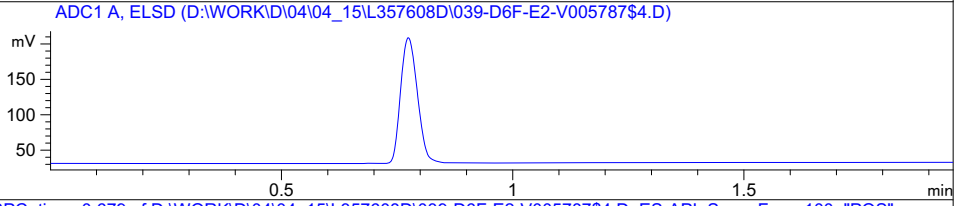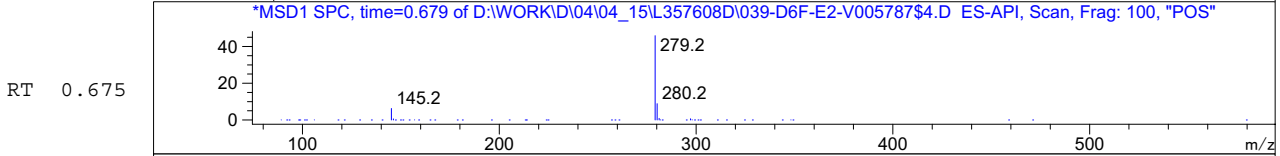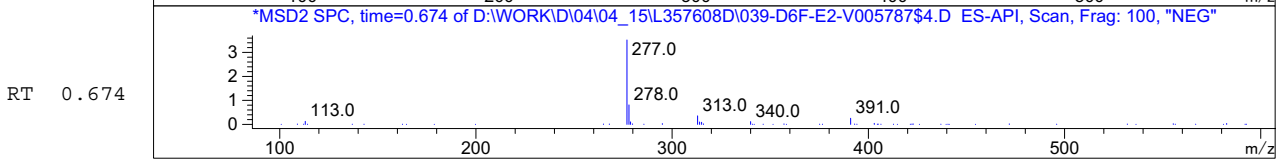

V123973\$1

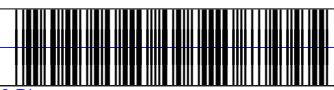

MaxPeak: 100.00%  
Ret\_Time: 2.310 min

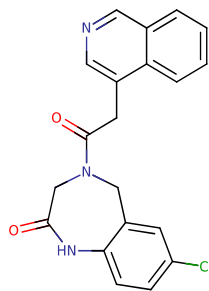

Mol Wt 365.81  
Exact Mass 365.11

| # | Time  | Area%  |
|---|-------|--------|
| 1 | 2.310 | 100.00 |

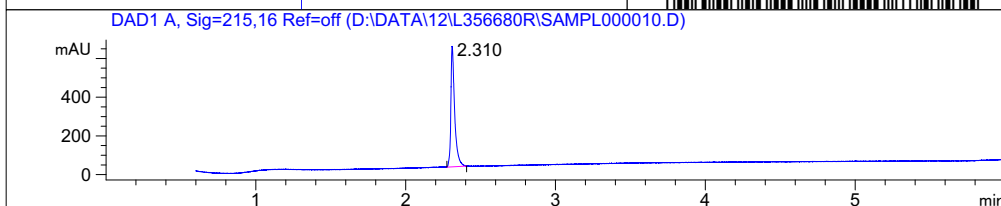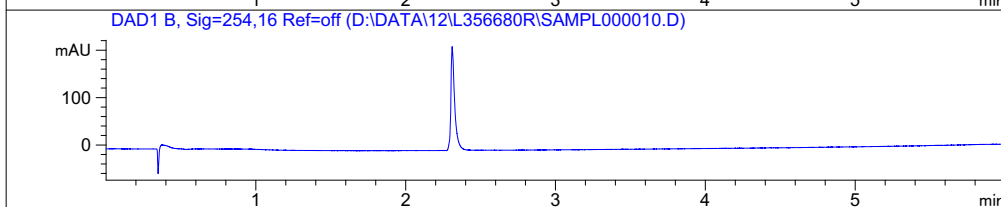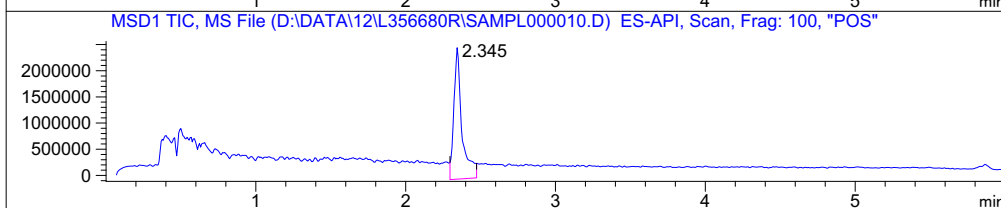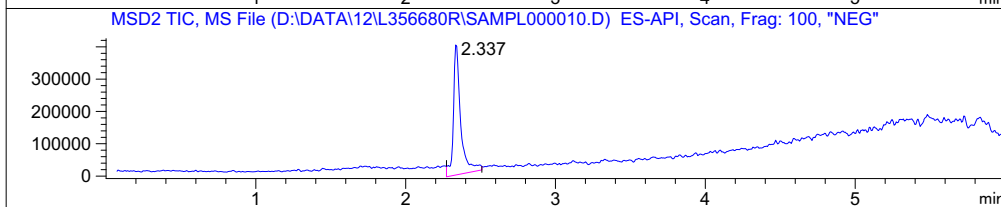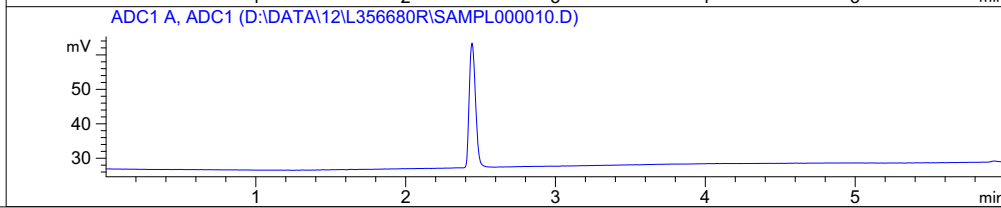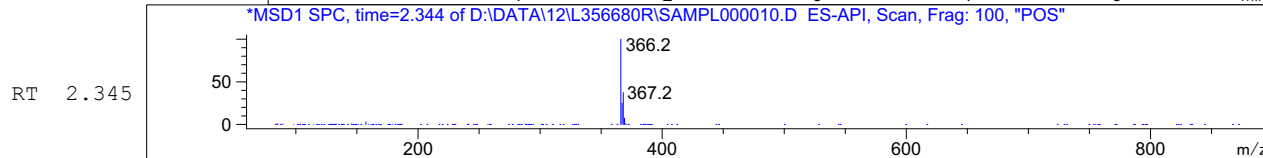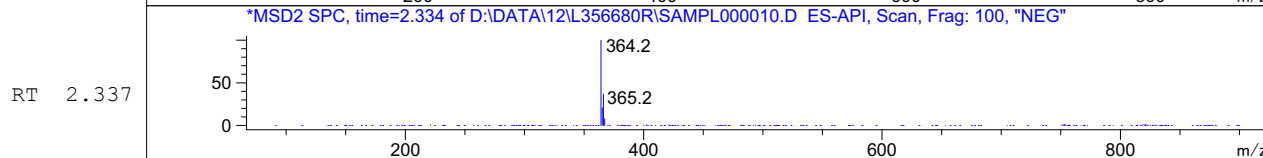

MaxPeak: 100.00%  
Ret\_Time: 1.483 min

U920101\$22

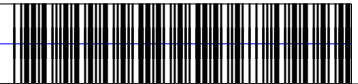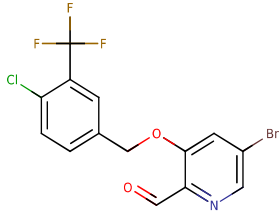

Mol Wt 394.57  
Exact Mass 394.95

| # | Time  | Area%  |
|---|-------|--------|
| 1 | 1.483 | 100.00 |

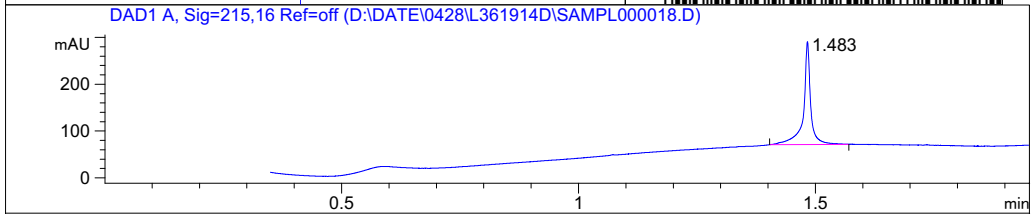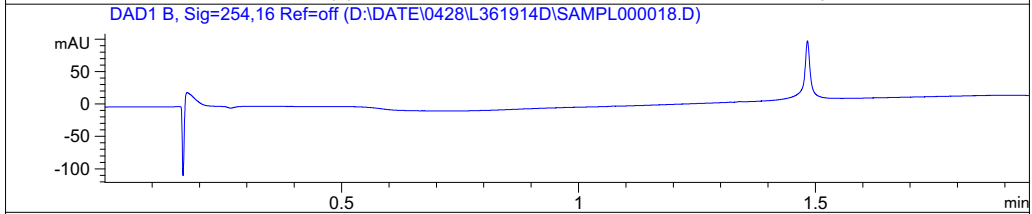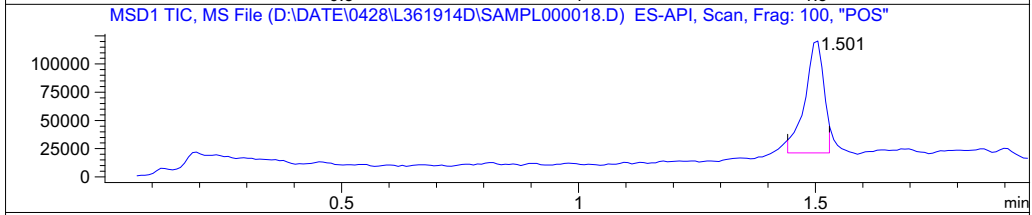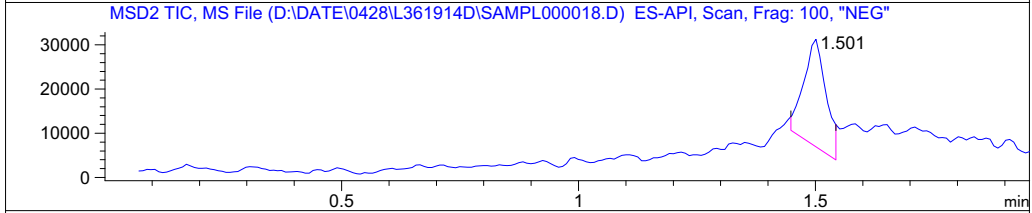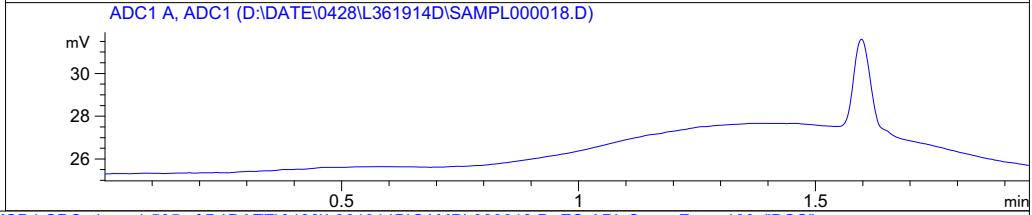

RT 1.501

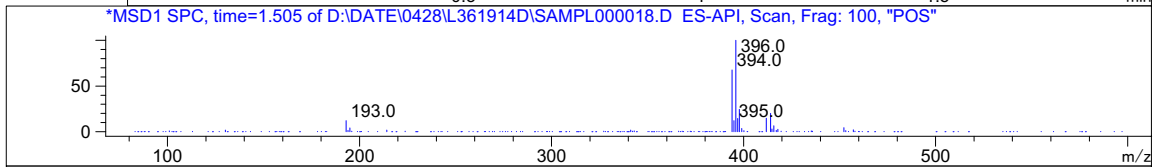

RT 1.501

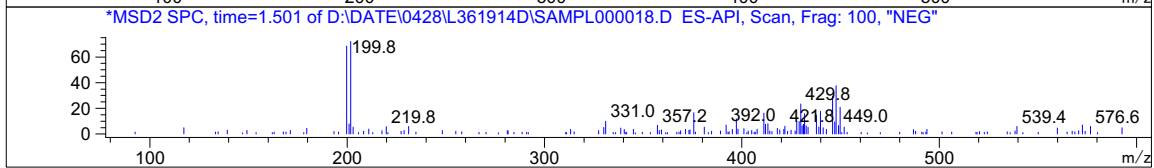

MaxPeak: 96.26%  
Ret\_Time: 2.010 min

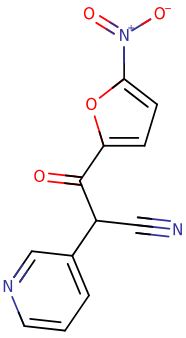

Mol Wt 257.2  
Exact Mass 257.03

| # | Time  | Area% |
|---|-------|-------|
| 1 | 0.971 | 3.74  |
| 2 | 2.010 | 96.26 |

# V245837\$1

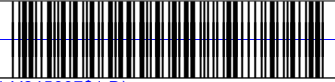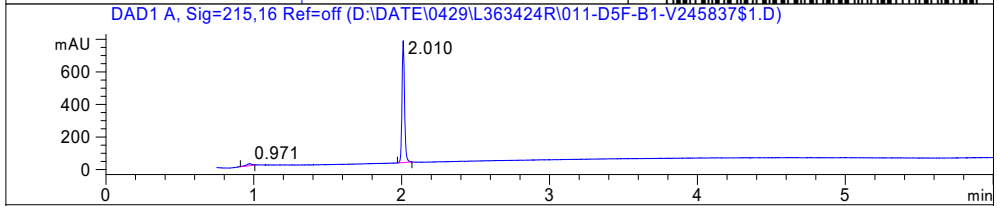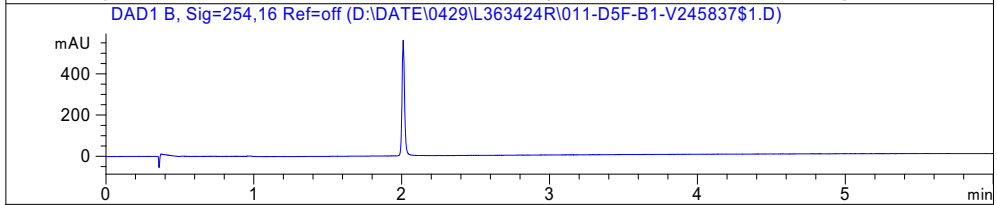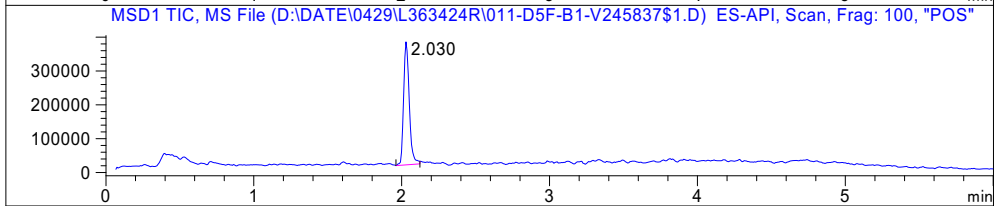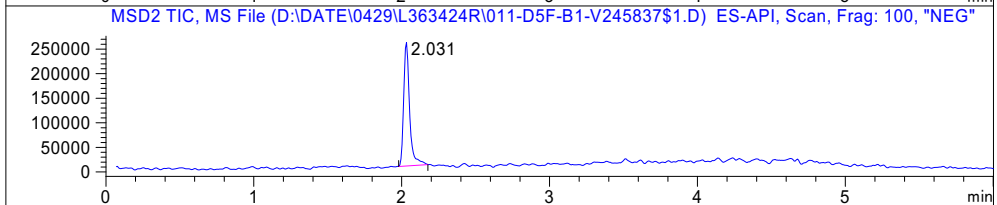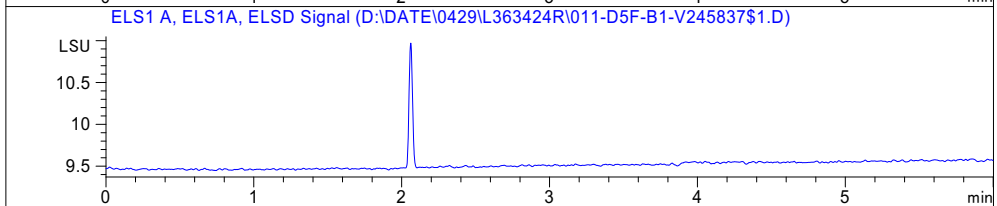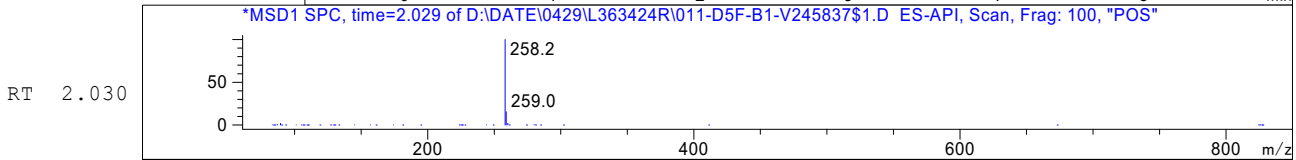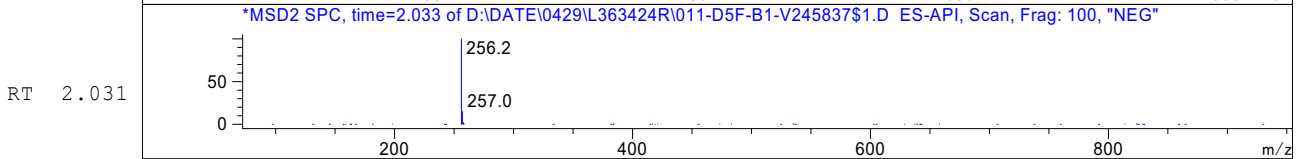

MaxPeak: 100.00%  
Ret\_Time: 3.908 min

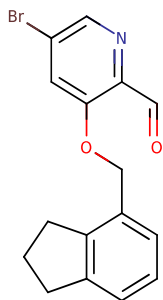

Mol Wt 332.19  
Exact Mass 331.04

| # | Time  | Area%  |
|---|-------|--------|
| 1 | 3.908 | 100.00 |

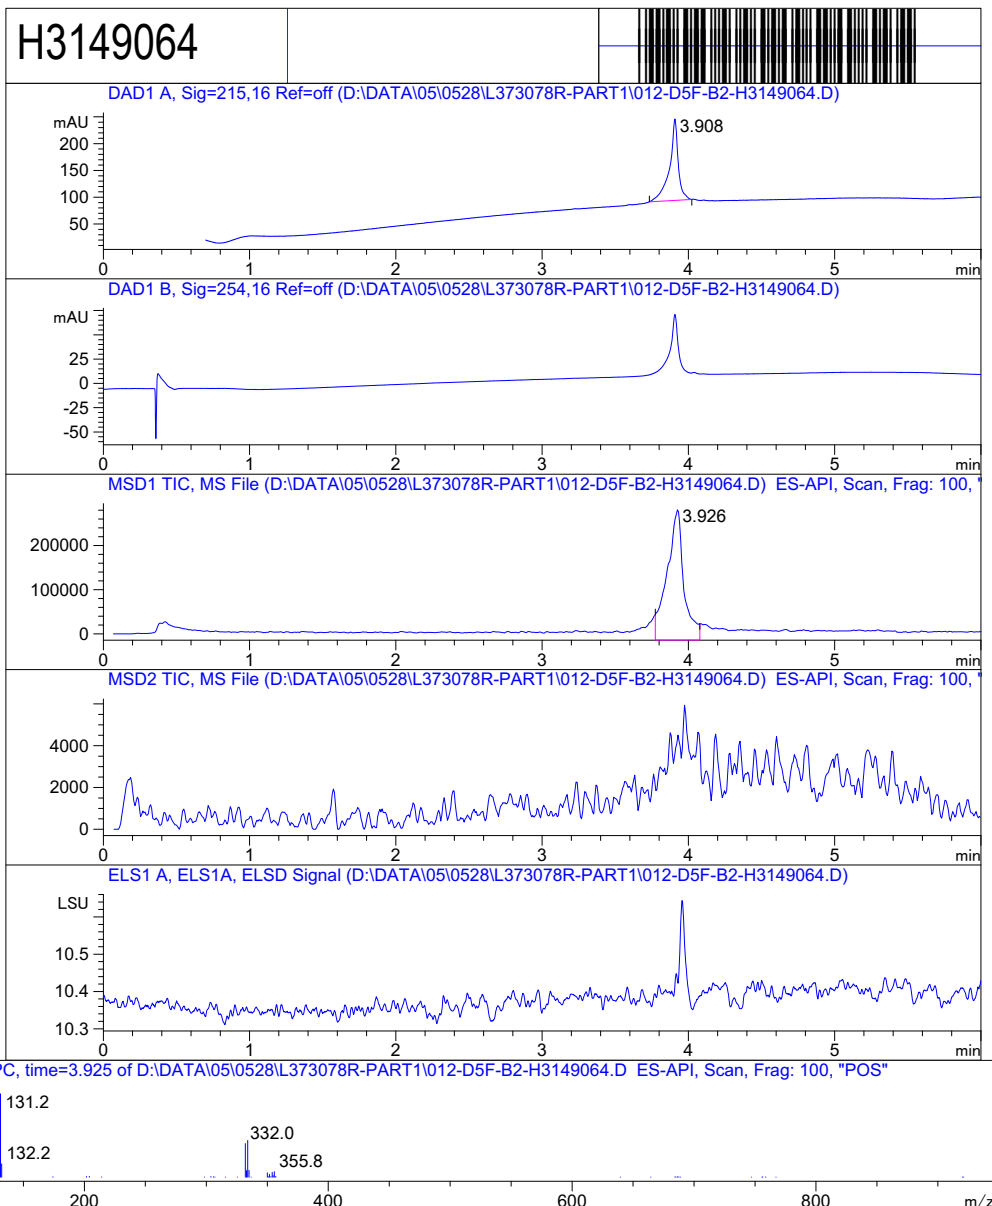

RT 3.926



MaxPeak: 99.08%  
Ret\_Time: 1.100 min

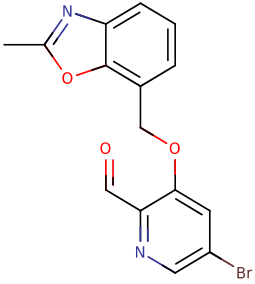

Mol Wt 347.16  
Exact Mass 346

| # | Time  | Area% |
|---|-------|-------|
| 1 | 1.100 | 99.08 |
| 2 | 1.159 | 0.92  |

V296344\$7

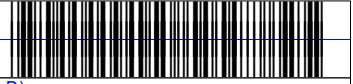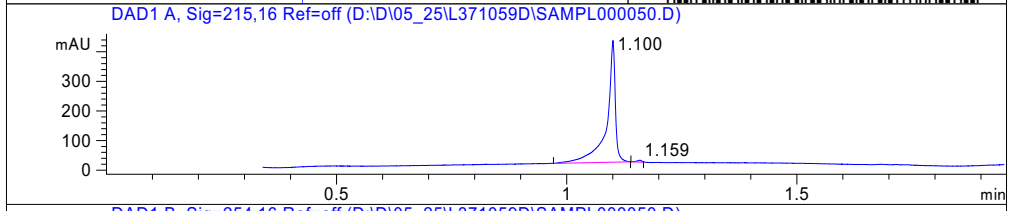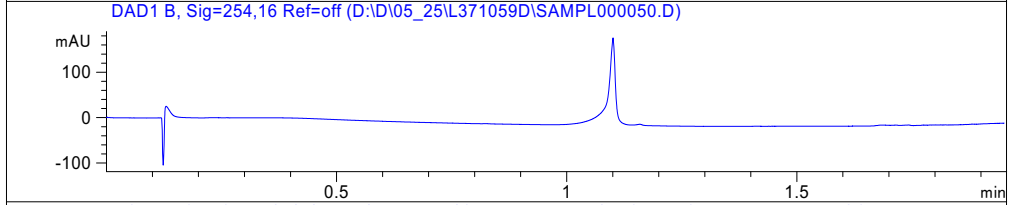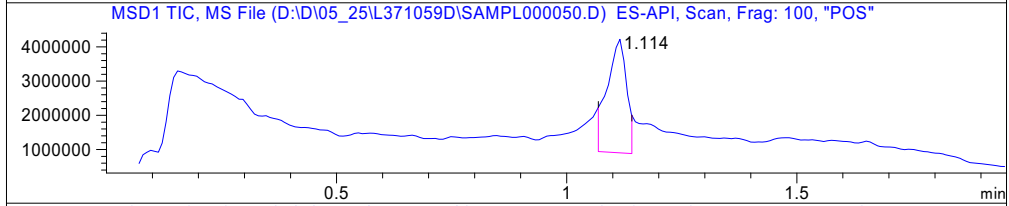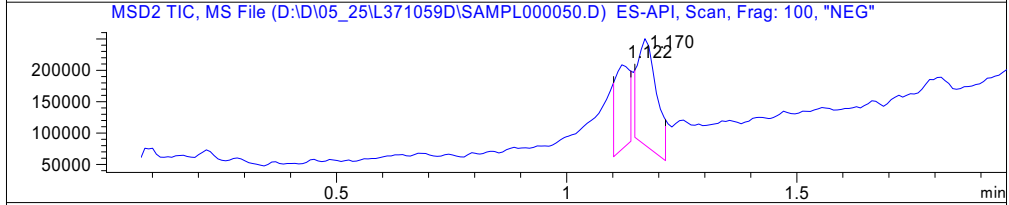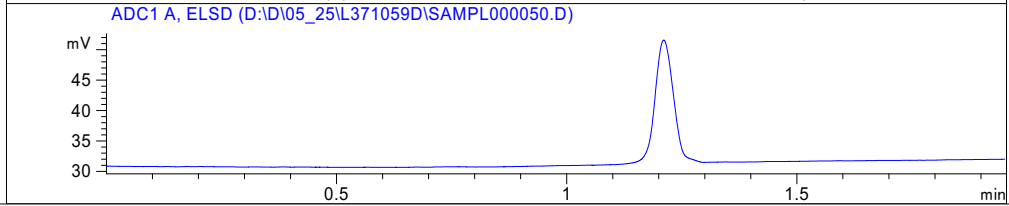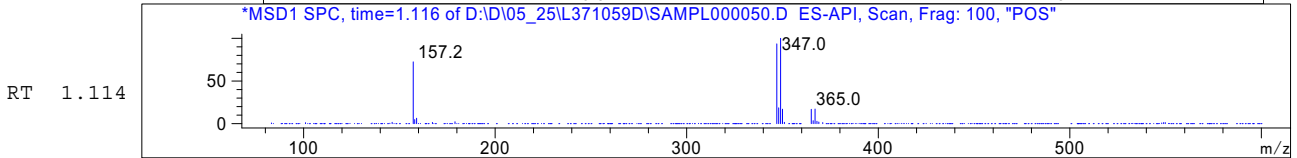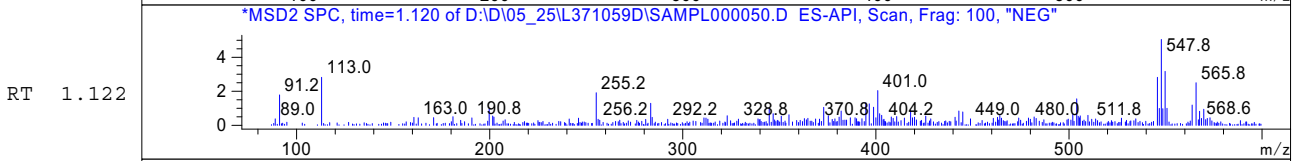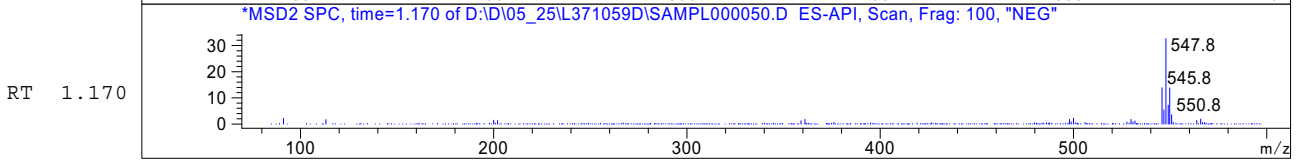

MaxPeak: 100.00%  
Ret\_Time: 1.568 min

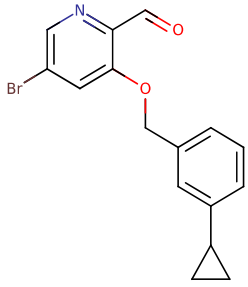

Mol Wt 332.19  
Exact Mass 331.04

| # | Time  | Area%  |
|---|-------|--------|
| 1 | 1.568 | 100.00 |

V211811\$A

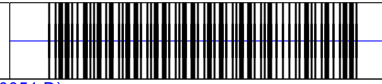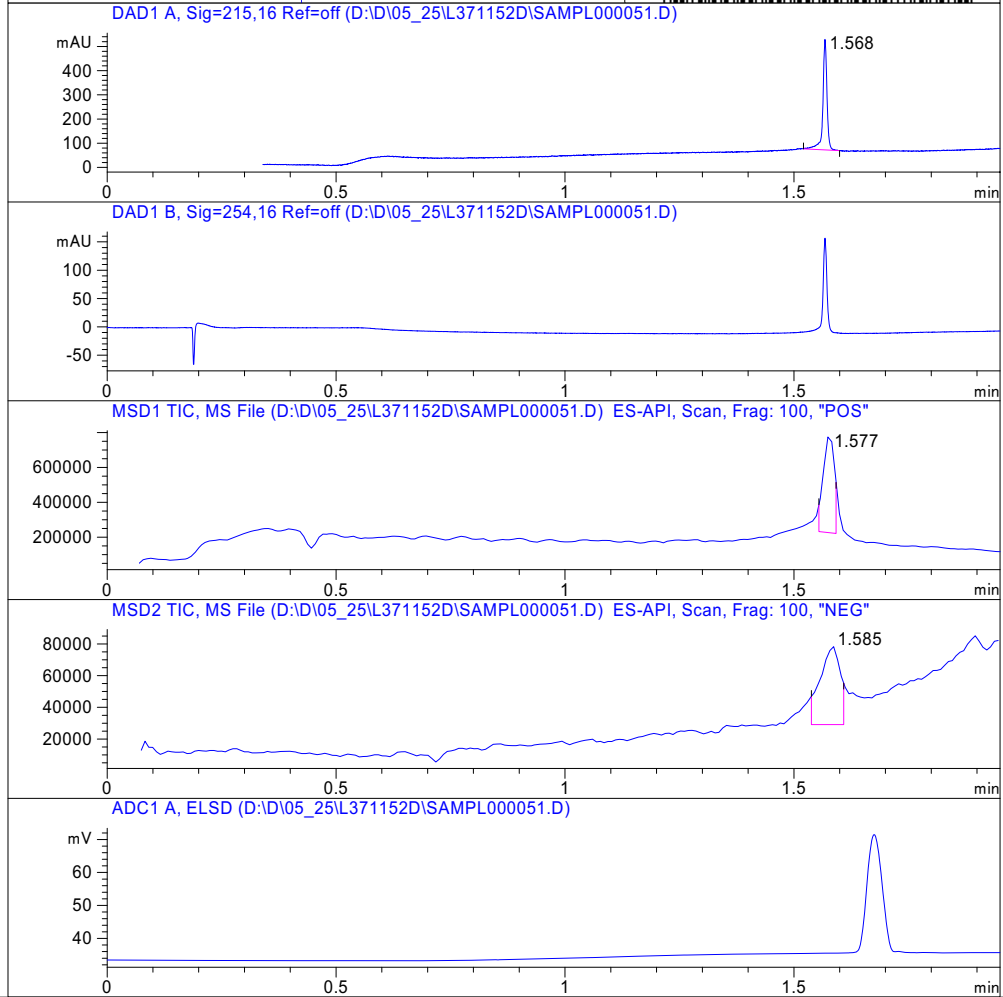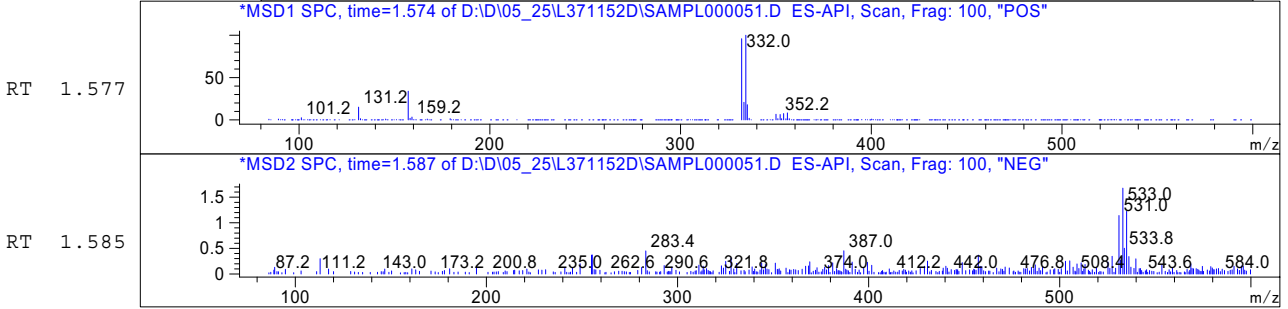

MaxPeak: 100.00%  
Ret\_Time: 1.128 min

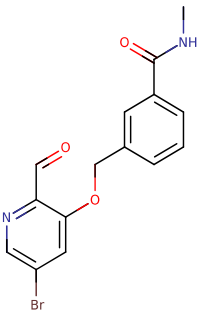

Mol Wt 349.18  
Exact Mass 348.02

| # | Time  | Area%  |
|---|-------|--------|
| 1 | 1.128 | 100.00 |

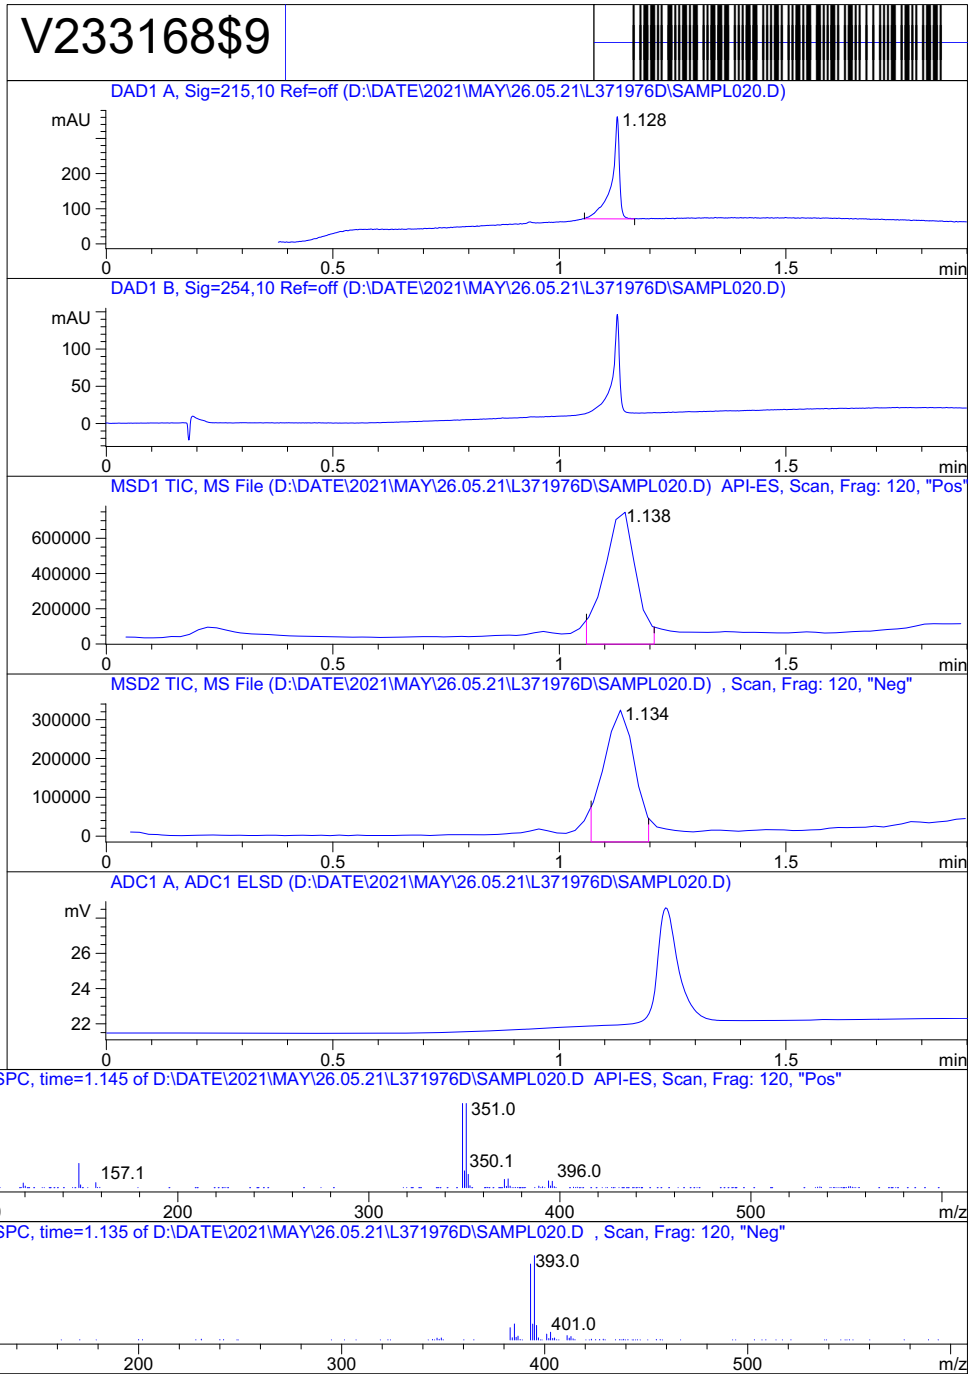

Inj.Date 5/26/2021

T

P2-C-03

-SL-

Acq. Method C:\HPCHEM\ ->

->

Z5009000157\_

MaxPeak: 100.00%  
Ret\_Time: 1.476 min

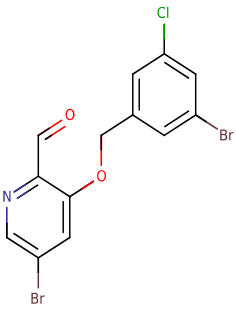

Mol Wt 405.47  
Exact Mass 404.87

| # | Time  | Area%  |
|---|-------|--------|
| 1 | 1.476 | 100.00 |

V233167\$2

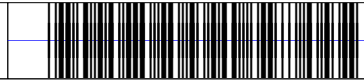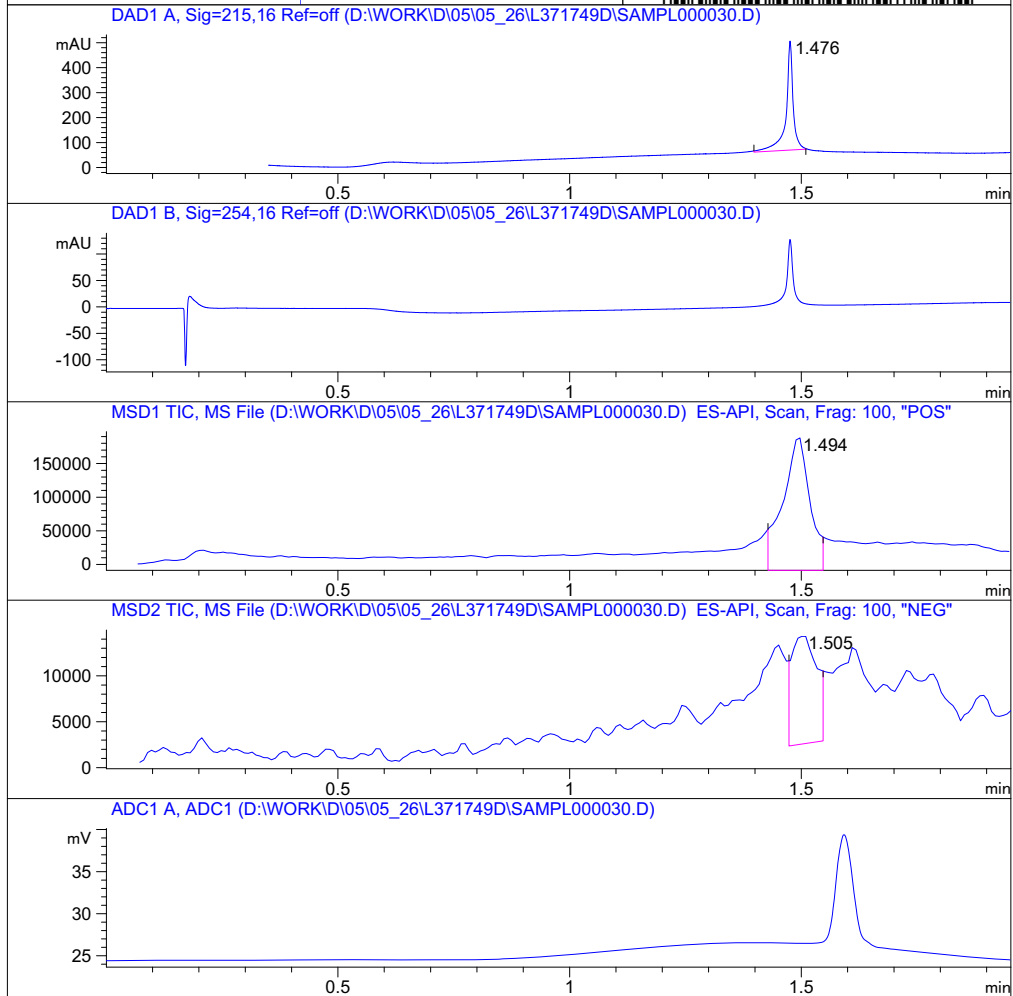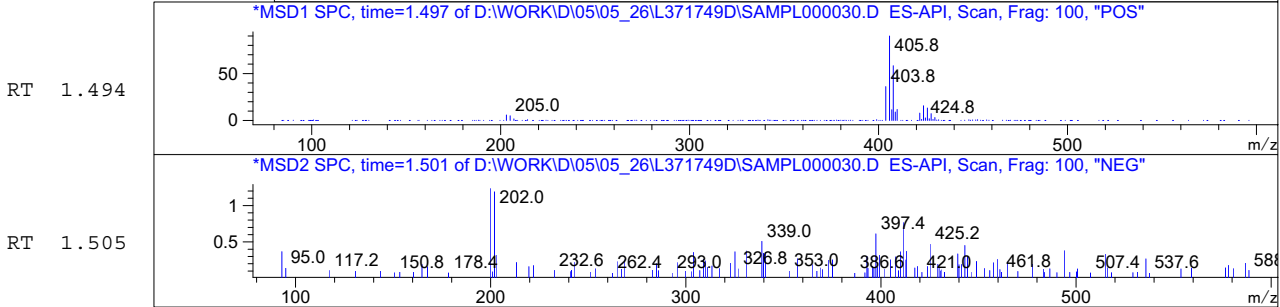

MaxPeak: 100.00%  
Ret\_Time: 3.583 min

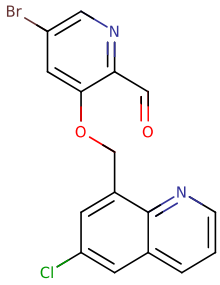

Mol Wt 377.62  
Exact Mass 377.97

| # | Time  | Area%  |
|---|-------|--------|
| 1 | 3.583 | 100.00 |

V233165\$6

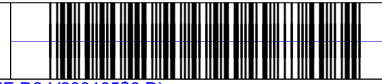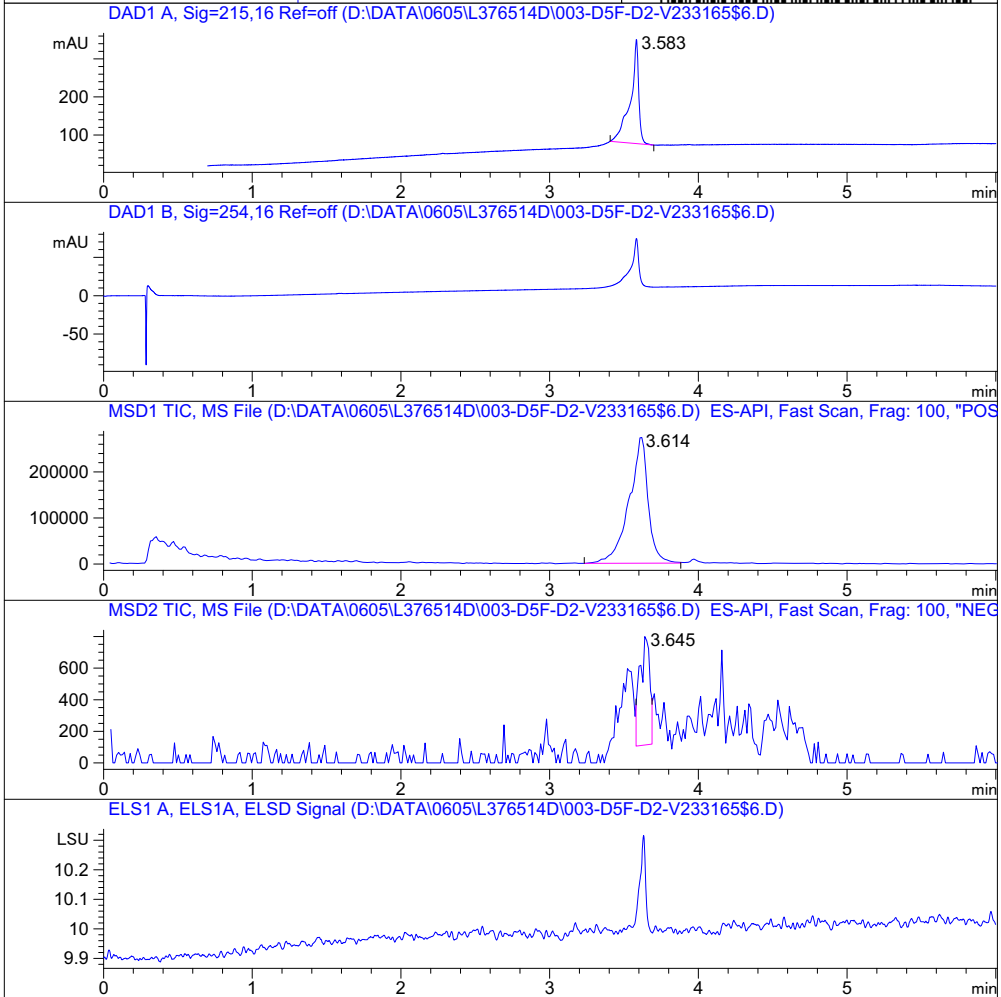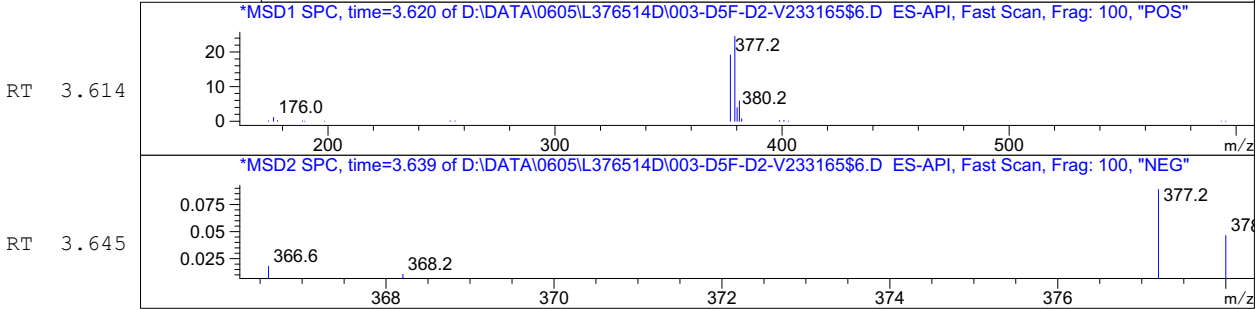

MaxPeak: 90.89%  
Ret\_Time: 1.542 min

V211815\$4

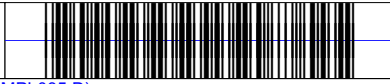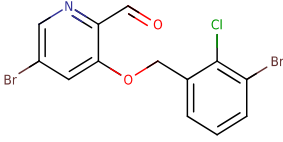

Mol Wt 405.47  
Exact Mass 404.87

| # | Time  | Area% |
|---|-------|-------|
| 1 | 0.954 | 4.30  |
| 2 | 0.990 | 4.81  |
| 3 | 1.542 | 90.89 |

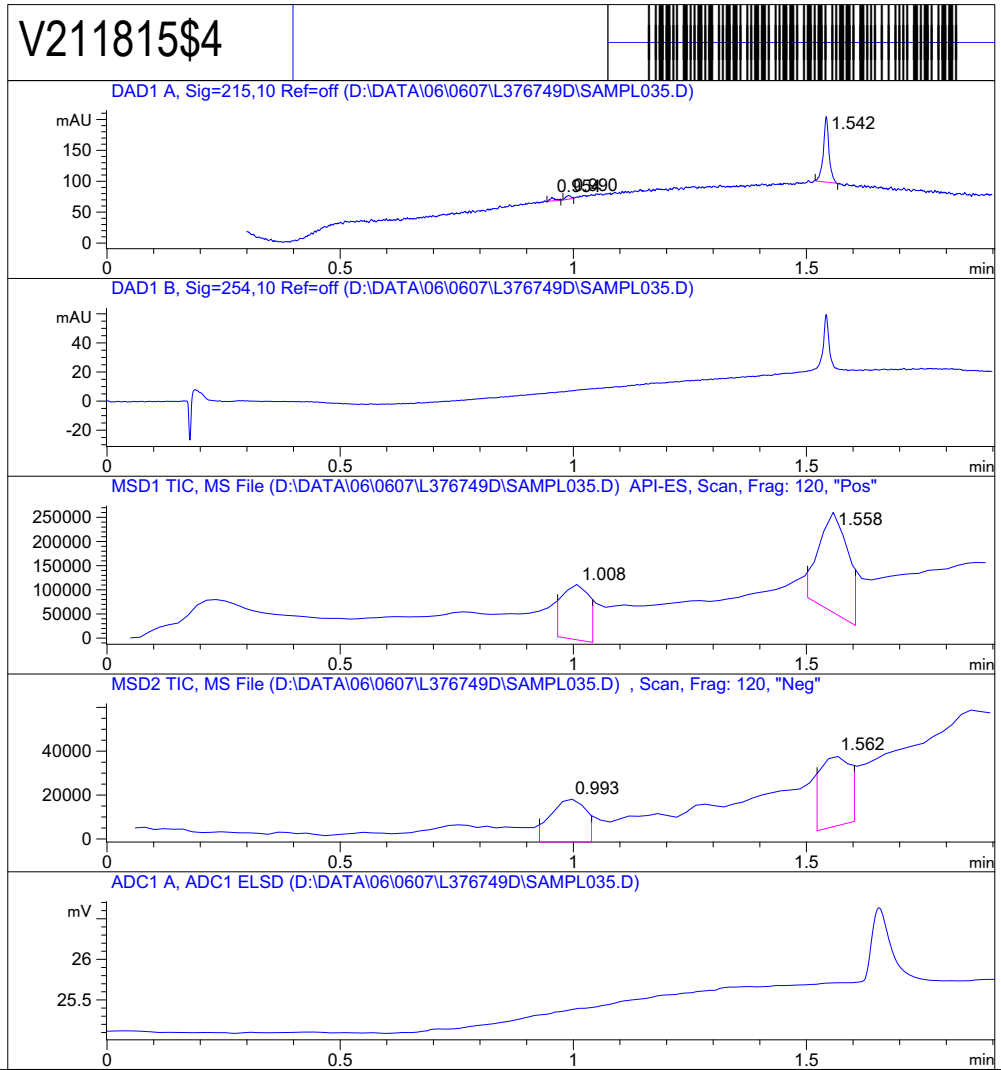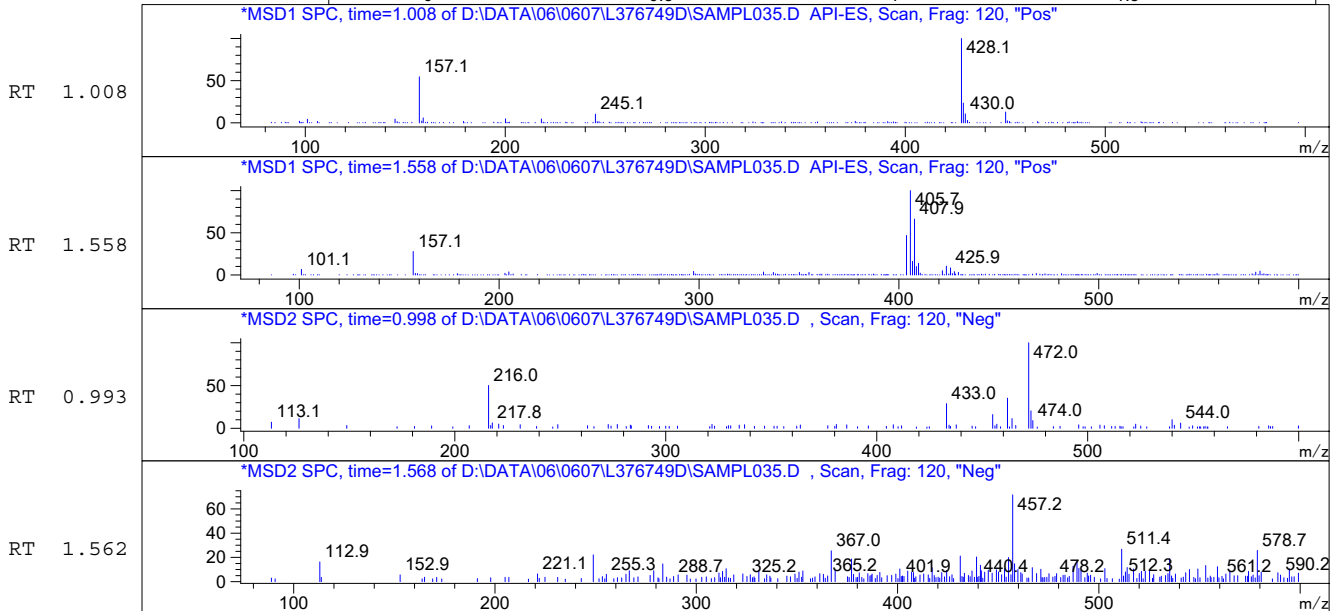

Inj.Date 6/6/2021

LT

-VL-

Acq. Method C:\HPCHEM\ -> ->

Z4989203260\_

MaxPeak: 100.00%  
Ret\_Time: 1.245 min

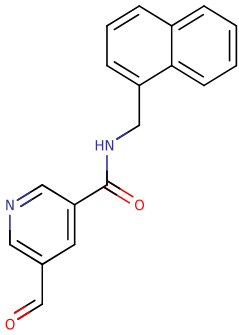

Mol Wt 290.32  
Exact Mass 290.12

| # | Time  | Area%  |
|---|-------|--------|
| 1 | 1.245 | 100.00 |

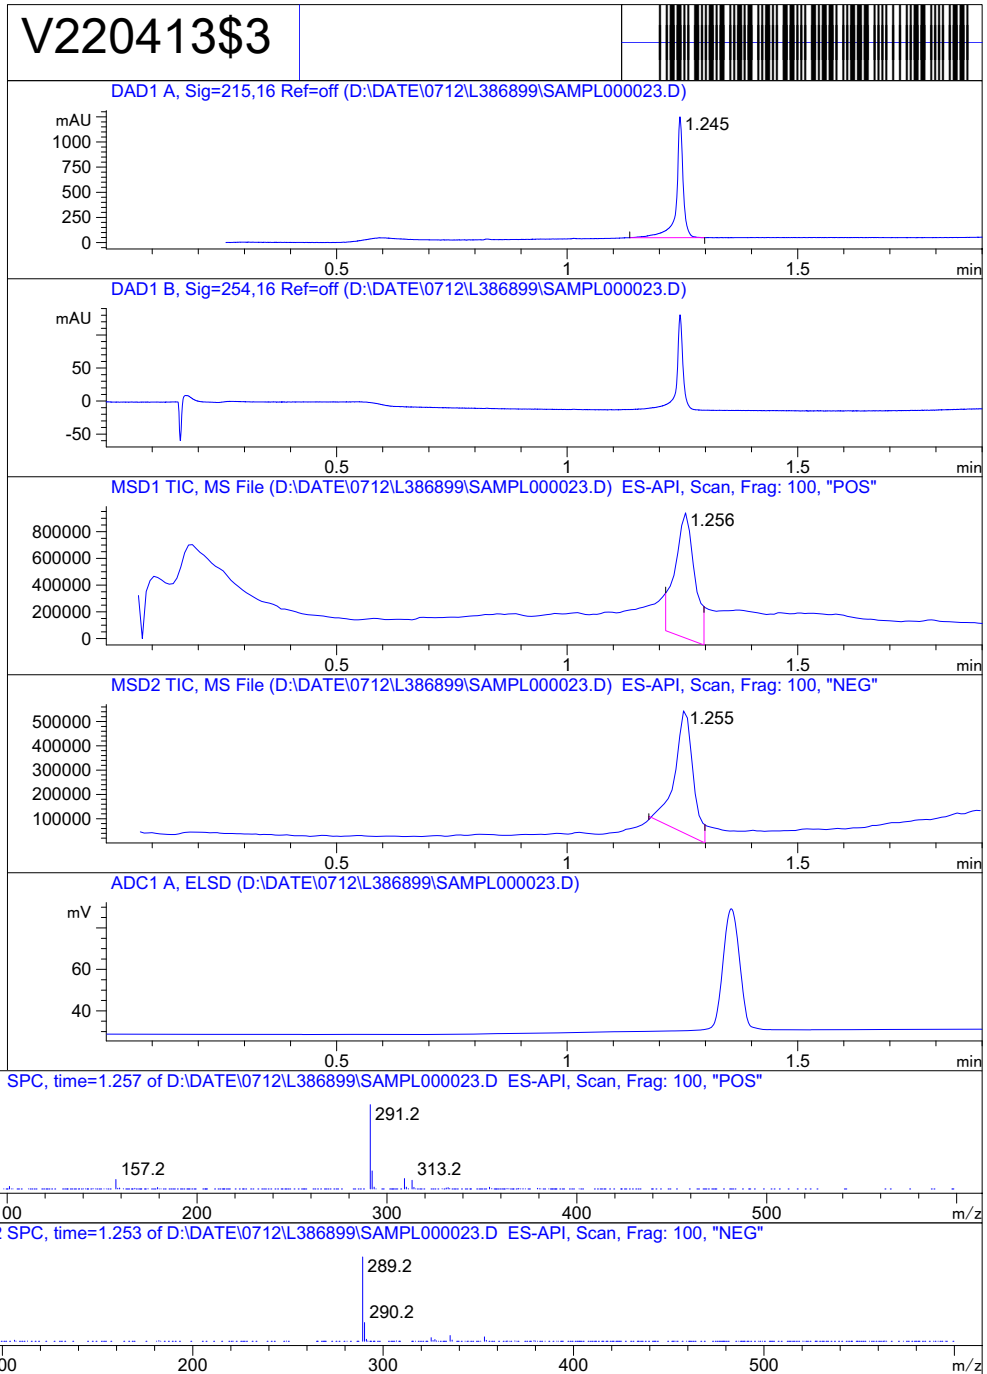

V816207\$5

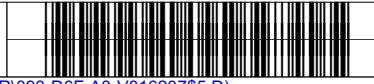

MaxPeak: 100.00%  
Ret\_Time: 1.237 min

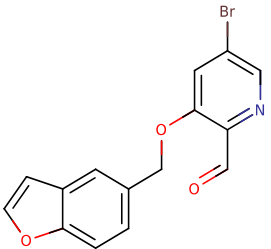

Mol Wt 332.15  
Exact Mass 330.99

| # | Time  | Area%  |
|---|-------|--------|
| 1 | 1.237 | 100.00 |

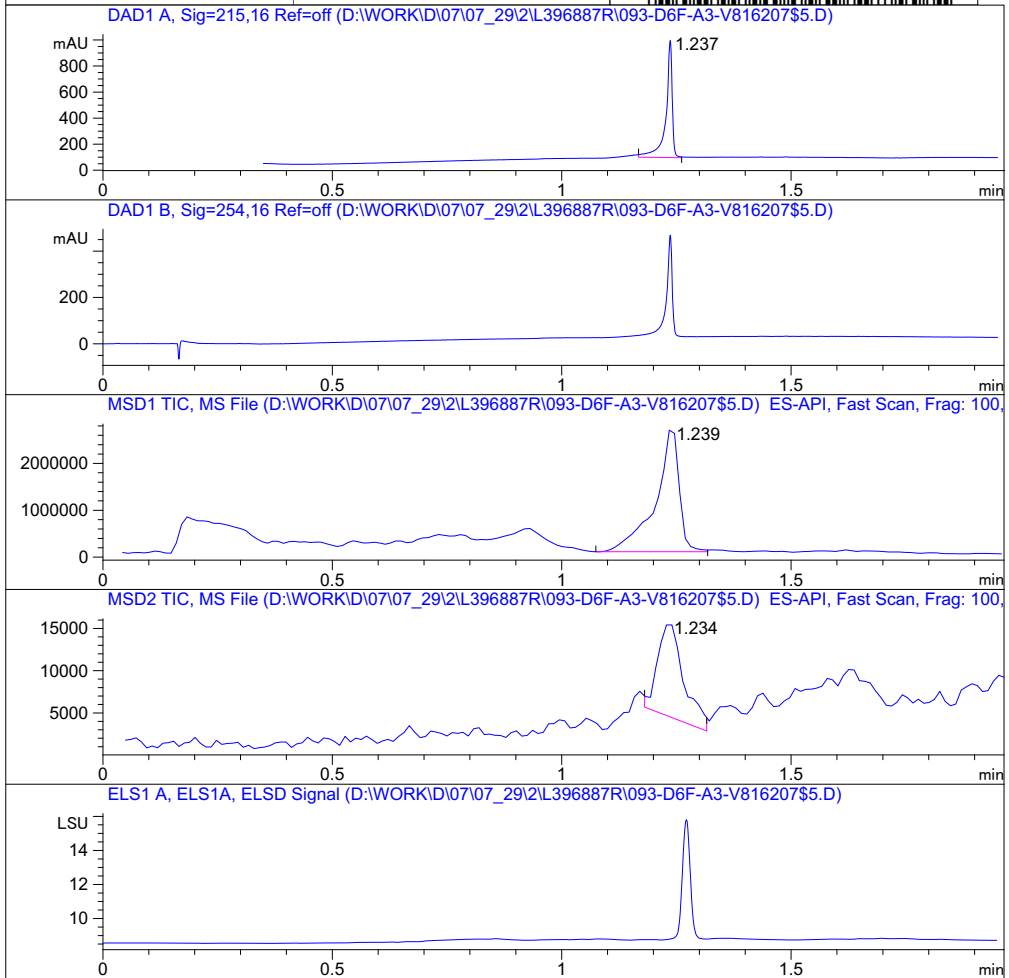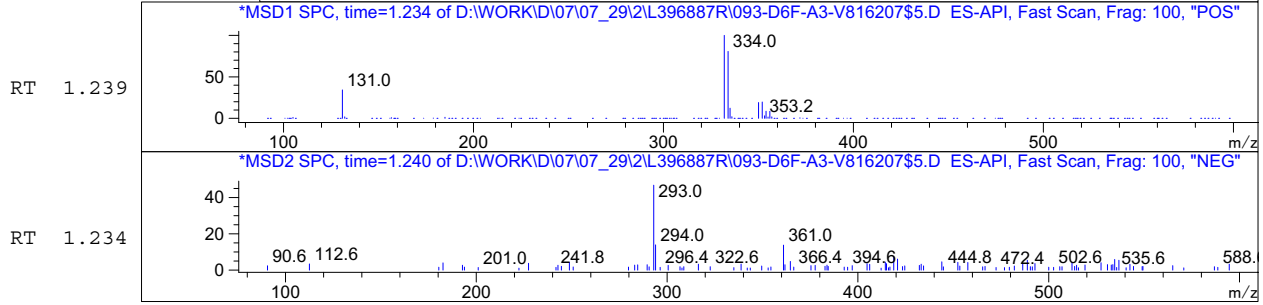

Inj.Date 7/29/2021

K <invalid>

Acq. Method C:\Users\ -> ->

Z5084954212\_



MaxPeak: 100.00%  
Ret\_Time: 1.504 min

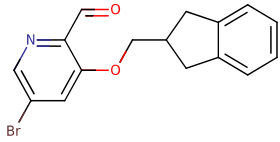

Mol Wt 332.19  
Exact Mass 331.04

| # | Time  | Area%  |
|---|-------|--------|
| 1 | 1.504 | 100.00 |

V609074\$4

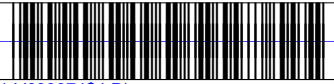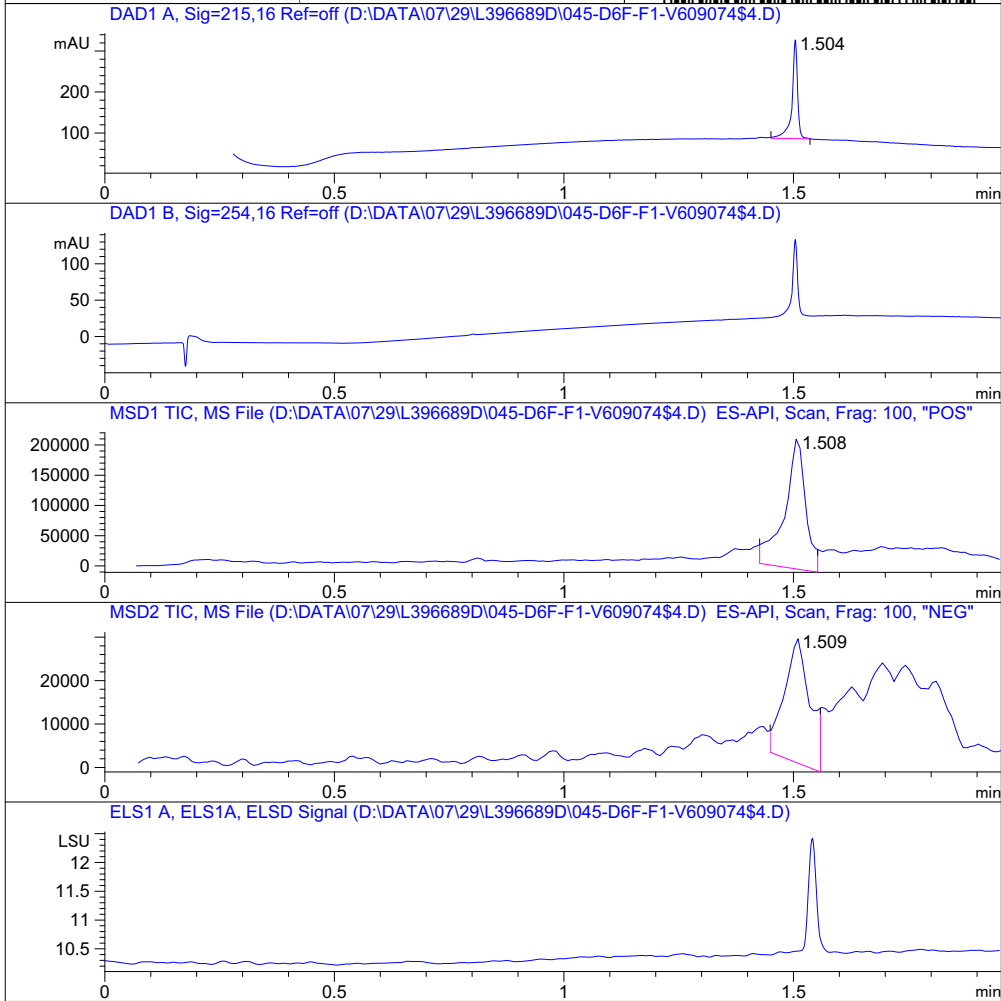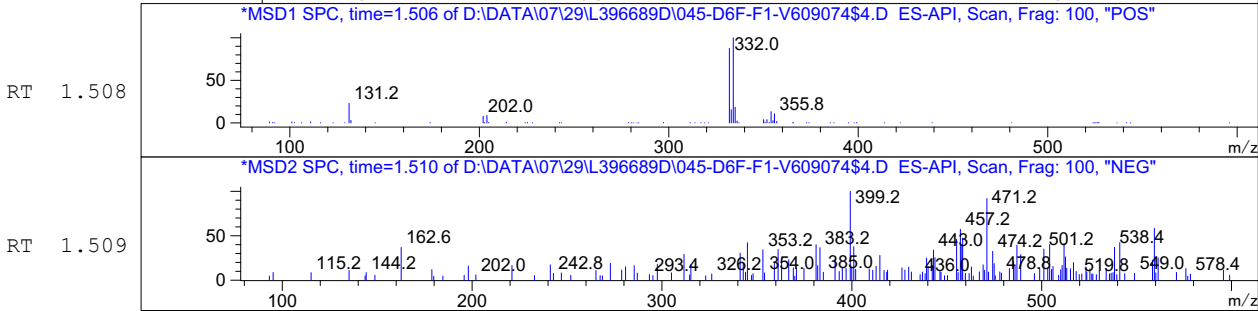

MaxPeak: 100.00%  
Ret\_Time: 1.551 min

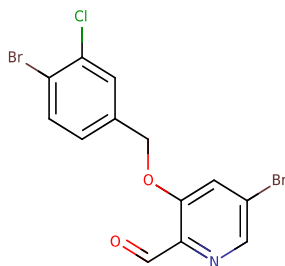

Mol Wt 405.47  
Exact Mass 404.87

| # | Time  | Area%  |
|---|-------|--------|
| 1 | 1.551 | 100.00 |

V609072\$7

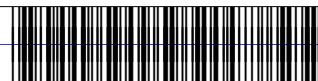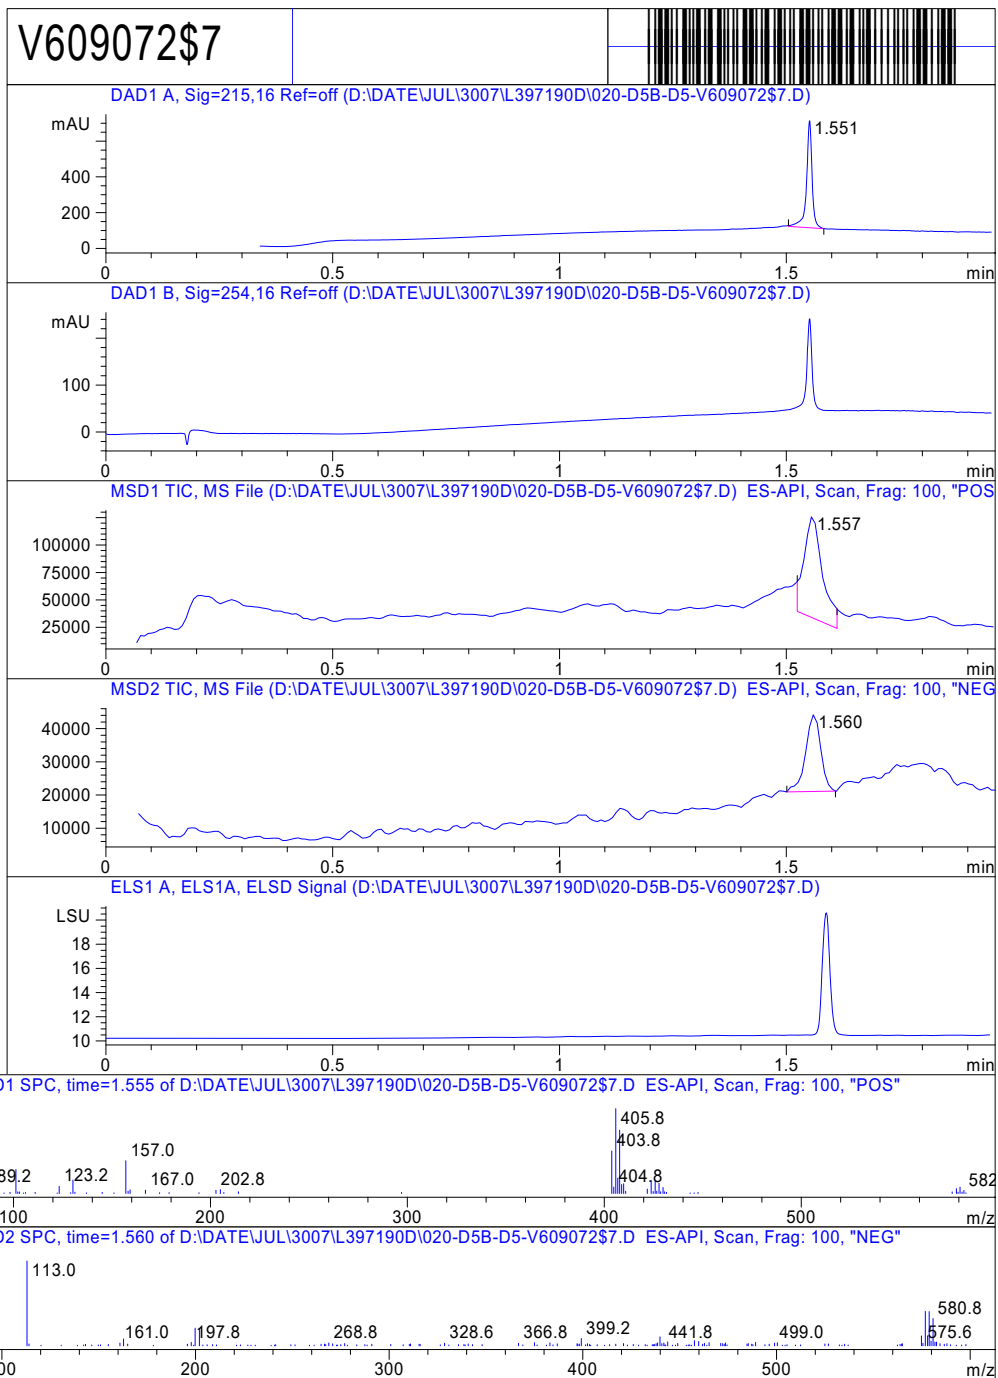

MaxPeak: 100.00%  
Ret\_Time: 1.516 min

V296340\$9

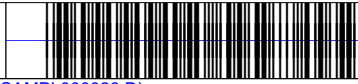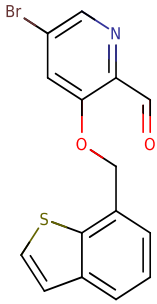

Mol Wt 348.21  
Exact Mass 348.97

| # | Time  | Area%  |
|---|-------|--------|
| 1 | 1.516 | 100.00 |

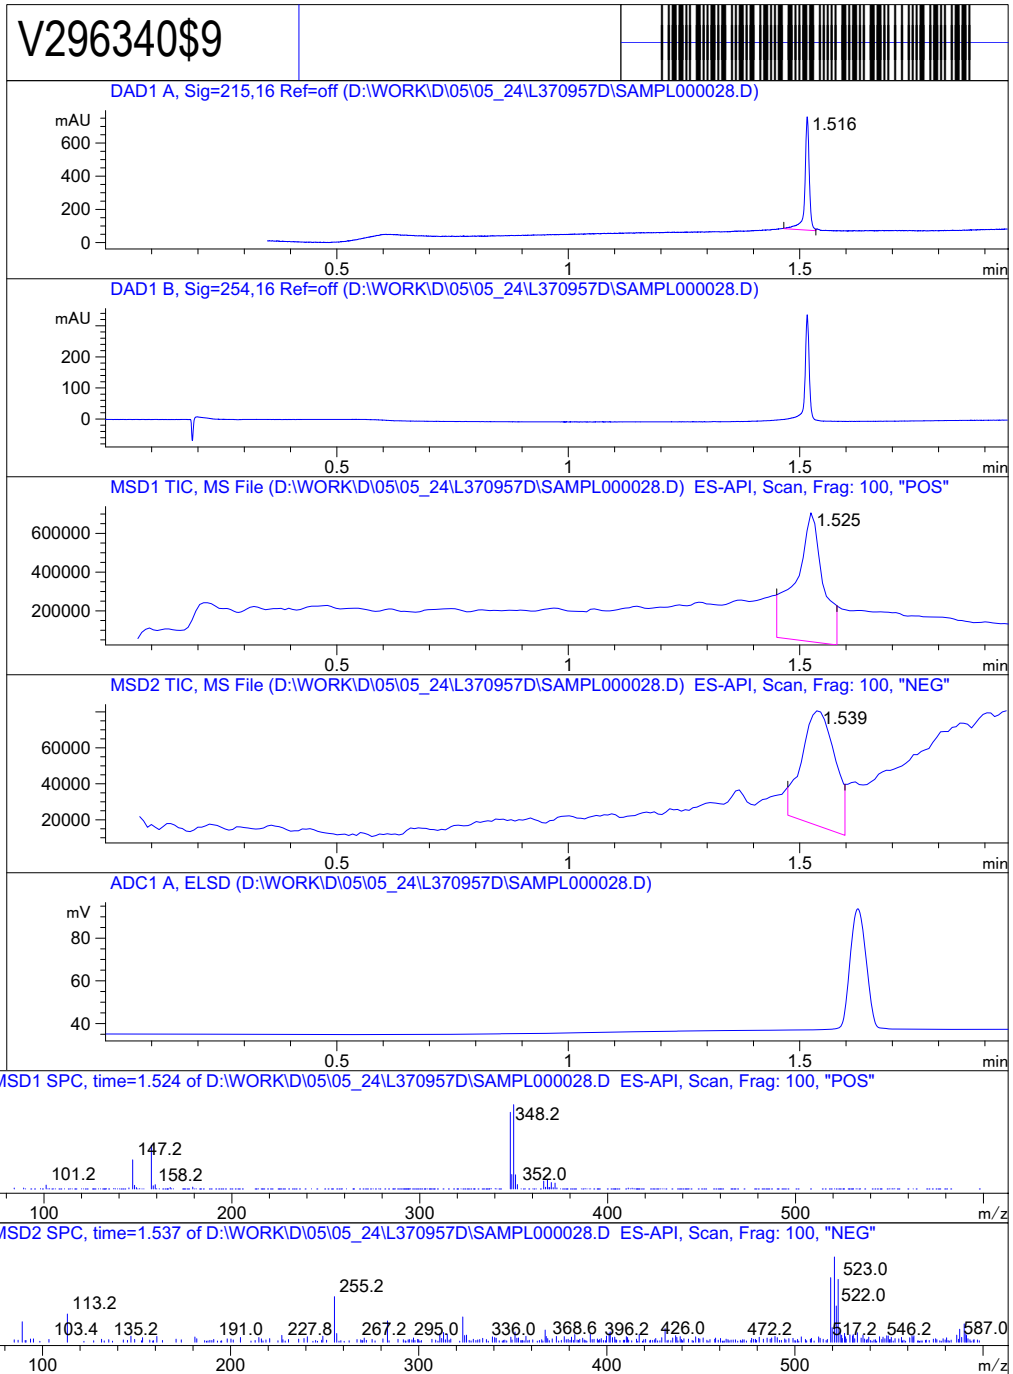

RT 1.525

RT 1.539

# W179753\$3

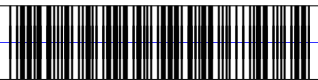

MaxPeak: 100.00%  
Ret\_Time: 1.650 min

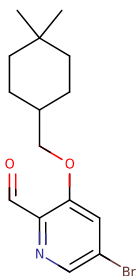

Mol Wt 326.23

Exact Mass 325.1

| # | Time  | Area%  |
|---|-------|--------|
| 1 | 1.650 | 100.00 |

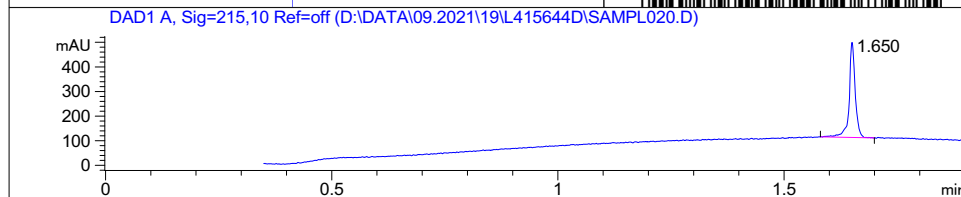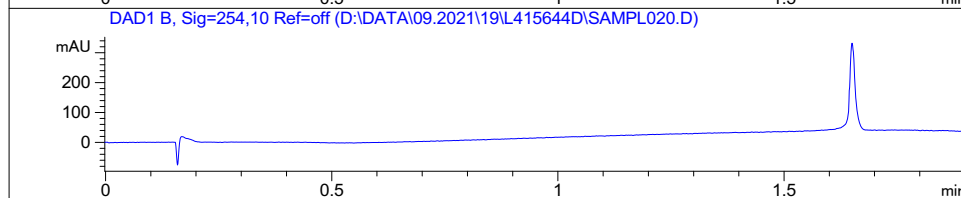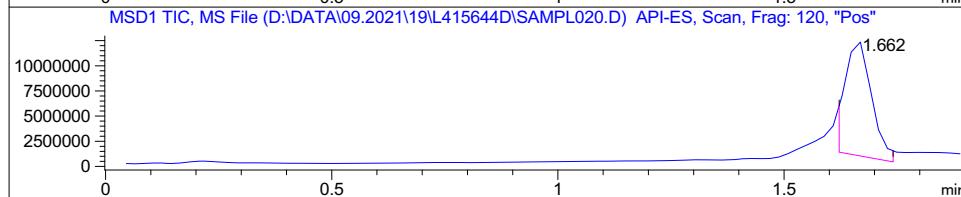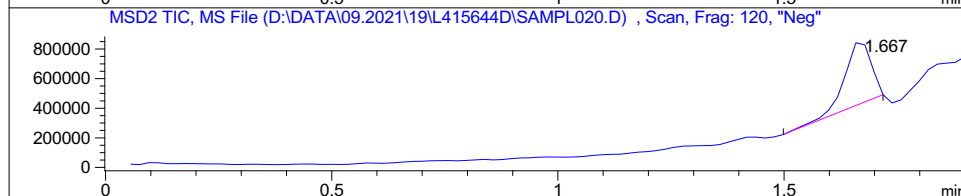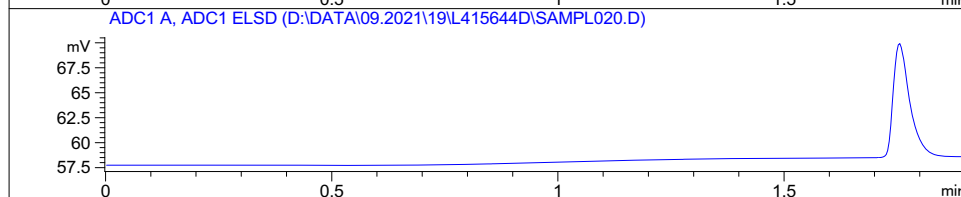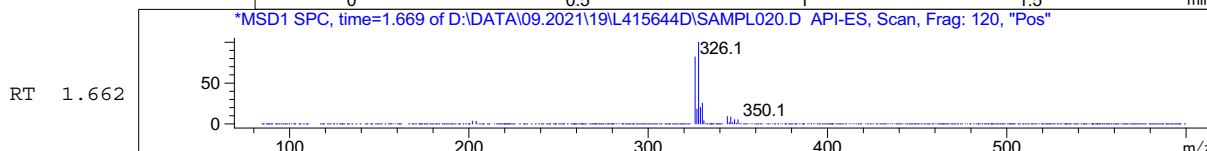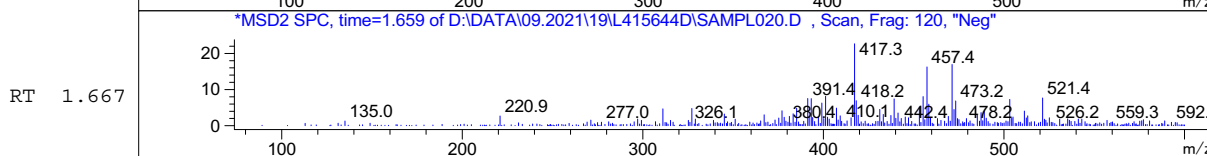

Inj.Date 9/19/2021

CH

P2-C-03

-SL-

Acq. Method C:\HPCHEM\ -> ->

Z5192779009\_

MaxPeak: 100.00%  
Ret\_Time: 1.193 min

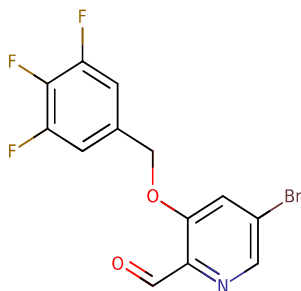

Mol Wt 346.1  
Exact Mass 344.97

| # | Time  | Area%  |
|---|-------|--------|
| 1 | 1.193 | 100.00 |

# W182833\$4

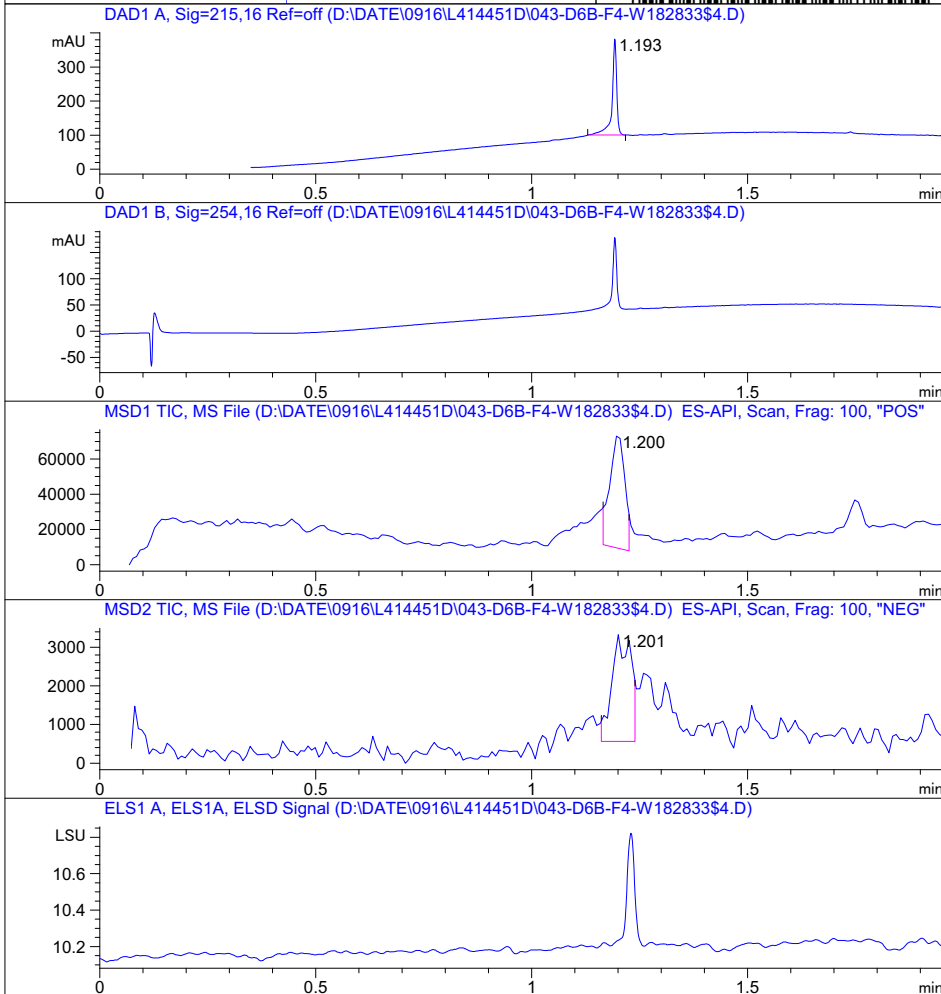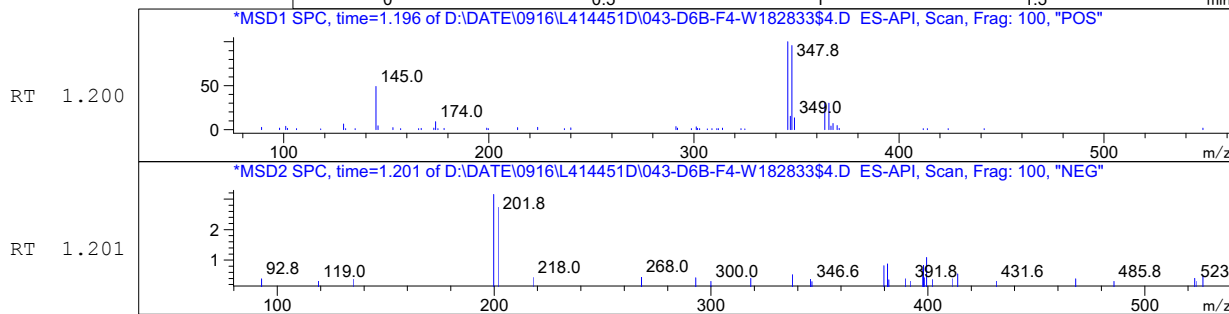

# W557252\$2

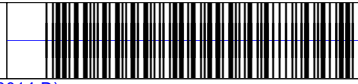

MaxPeak: 98.96%  
Ret\_Time: 1.146 min

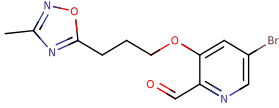

Mol Wt 326.15  
Exact Mass 325.01

| # | Time  | Area% |
|---|-------|-------|
| 1 | 0.909 | 1.04  |
| 2 | 1.146 | 98.96 |

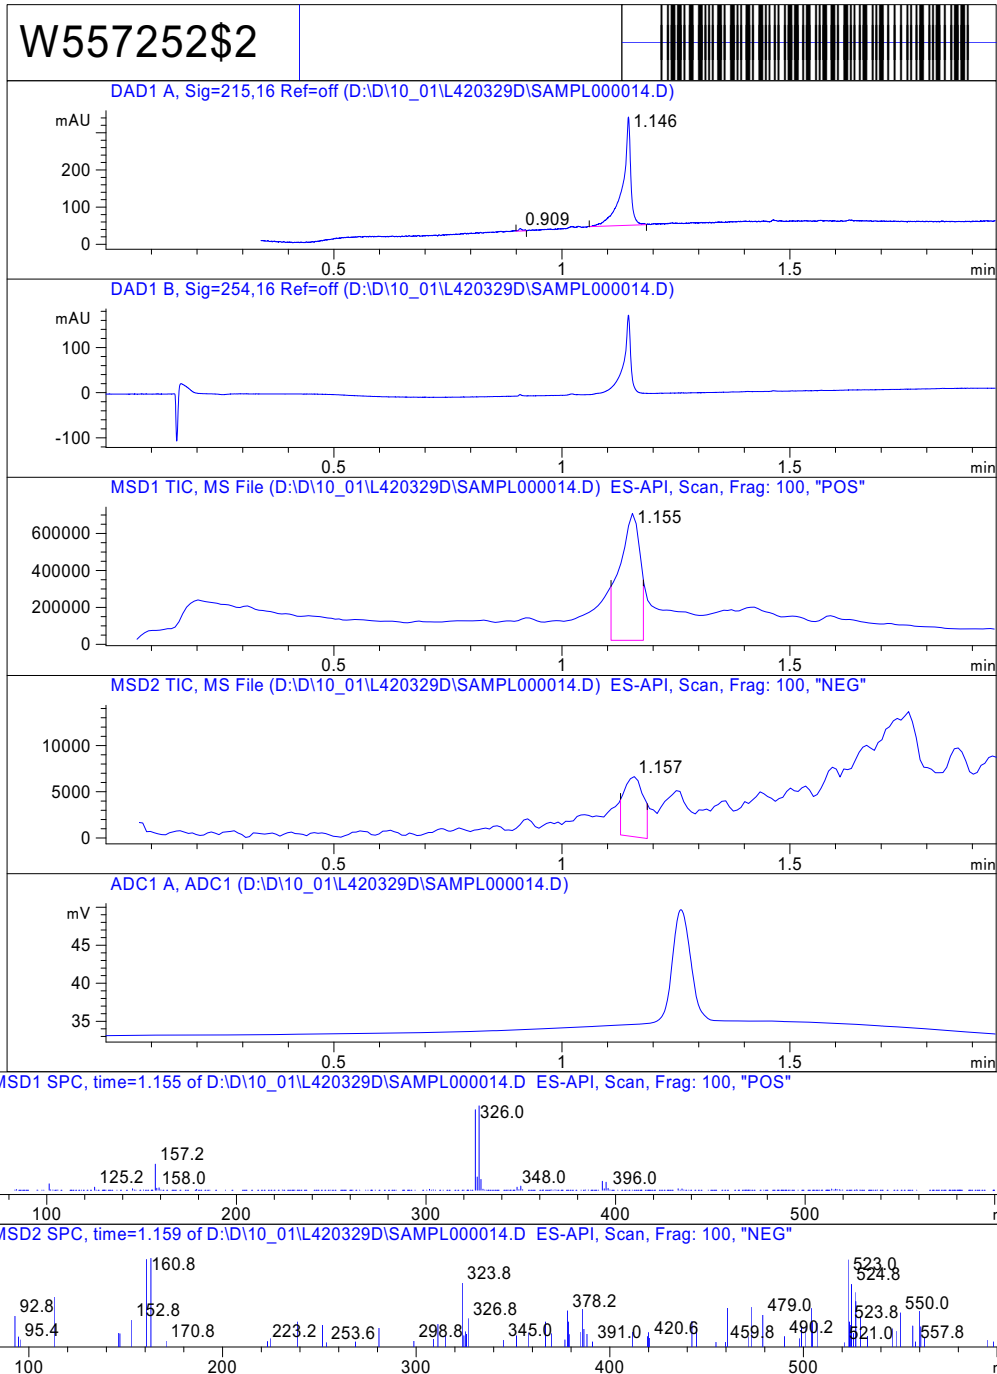

RT 1.155

RT 1.157

MaxPeak: 100.00%  
Ret\_Time: 1.476 min

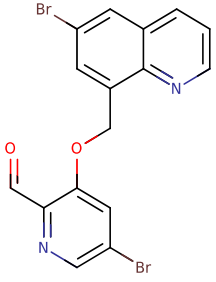

Mol Wt 422.07  
Exact Mass 421.92

| # | Time  | Area%  |
|---|-------|--------|
| 1 | 1.476 | 100.00 |

W557642\$B

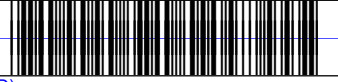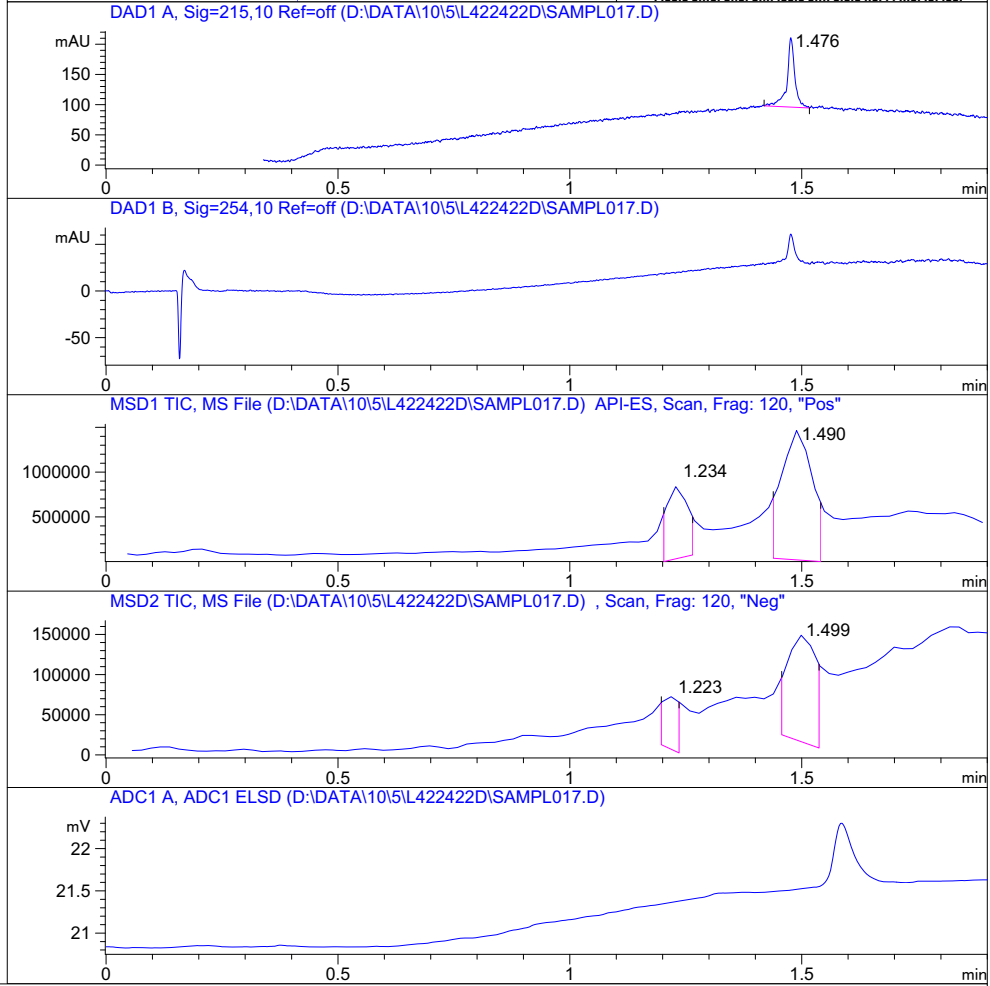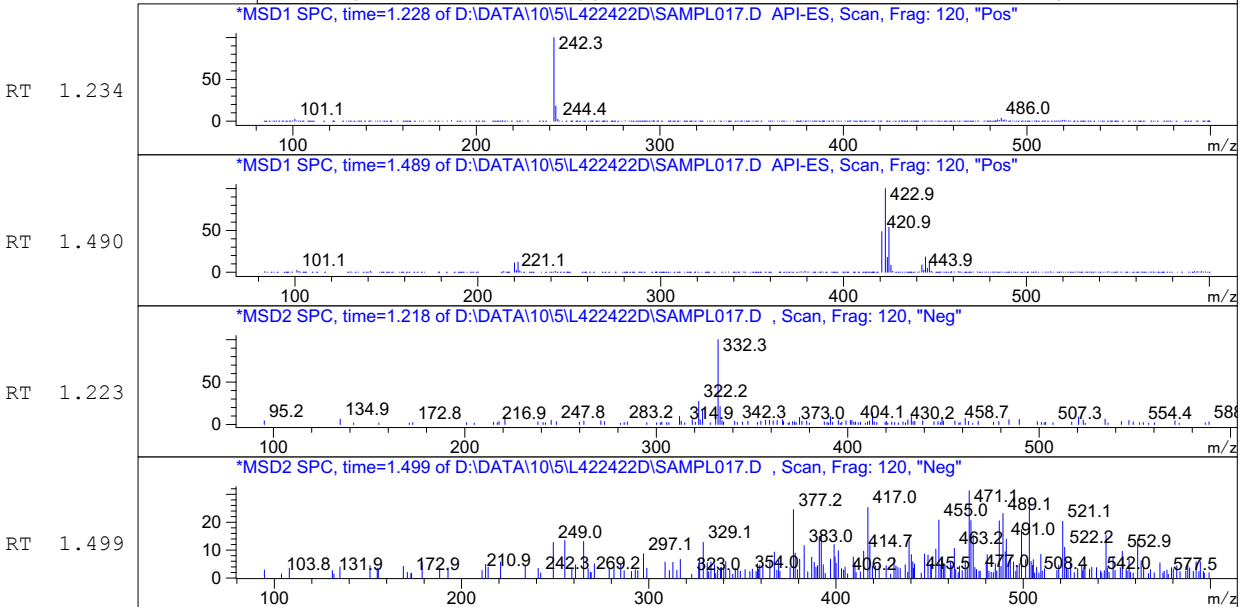

Inj.Date 10/6/2021

LB

-SL-

Acq. Method C:\HPCHEM\--> -->

Z5192779150\_

MaxPeak: 100.00%  
Ret\_Time: 2.908 min

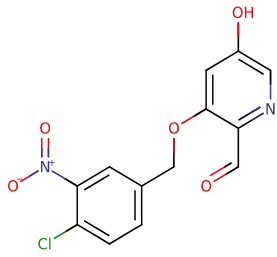

Mol Wt 308.67  
Exact Mass 308.01

| # | Time  | Area%  |
|---|-------|--------|
| 1 | 2.908 | 100.00 |

W656530\$2

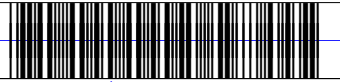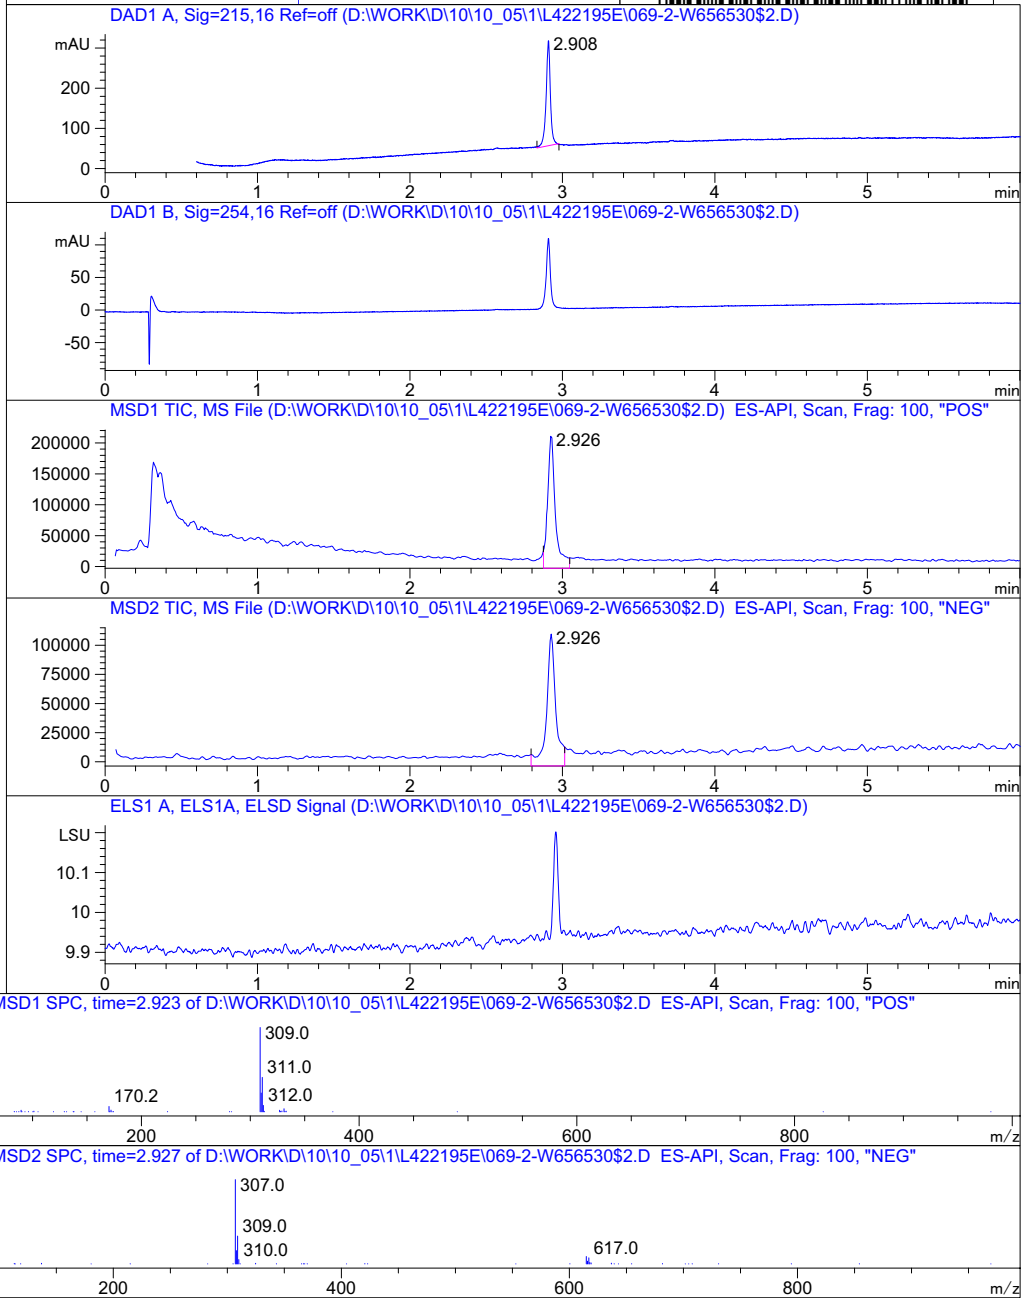



# W847046\$2

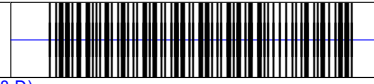

MaxPeak: 100.00%  
Ret\_Time: 1.326 min

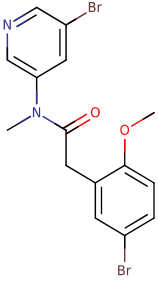

Mol Wt 414.09  
Exact Mass 413.96

| # | Time  | Area%  |
|---|-------|--------|
| 1 | 1.326 | 100.00 |

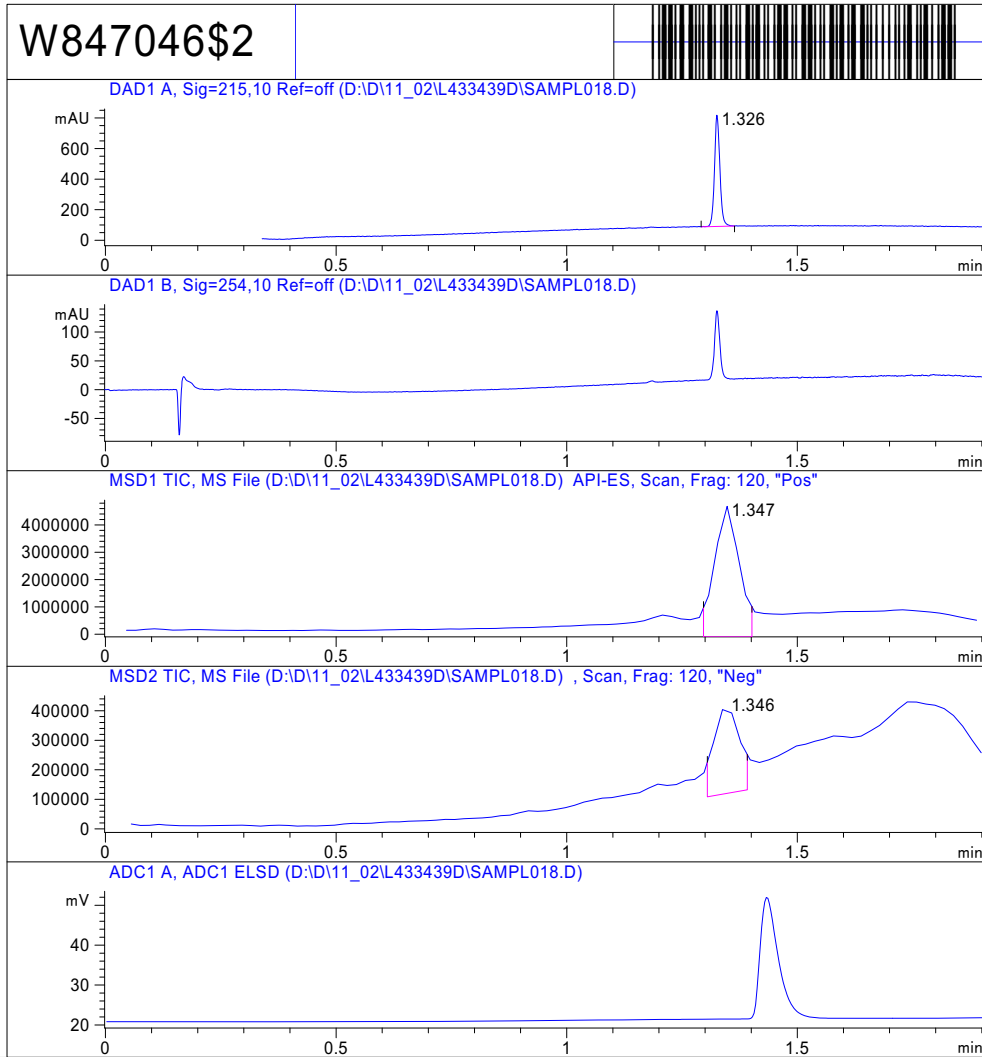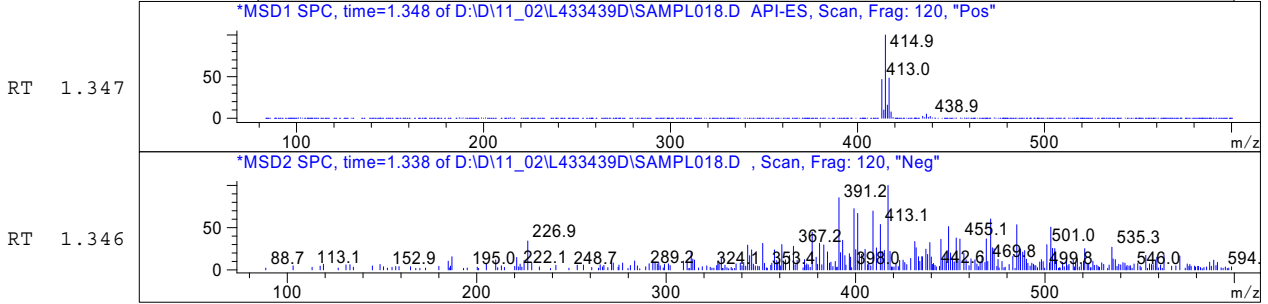

Inj.Date 11/2/2021

N

-SL-

Acq. Method C:\HPCHEM\ -> ->

Z5385490967\_

MaxPeak: 100.00%  
Ret\_Time: 1.134 min

W847028\$3

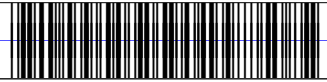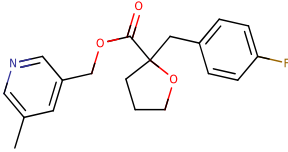

Mol Wt 329.36  
Exact Mass 329.17

| # | Time  | Area%  |
|---|-------|--------|
| 1 | 1.134 | 100.00 |

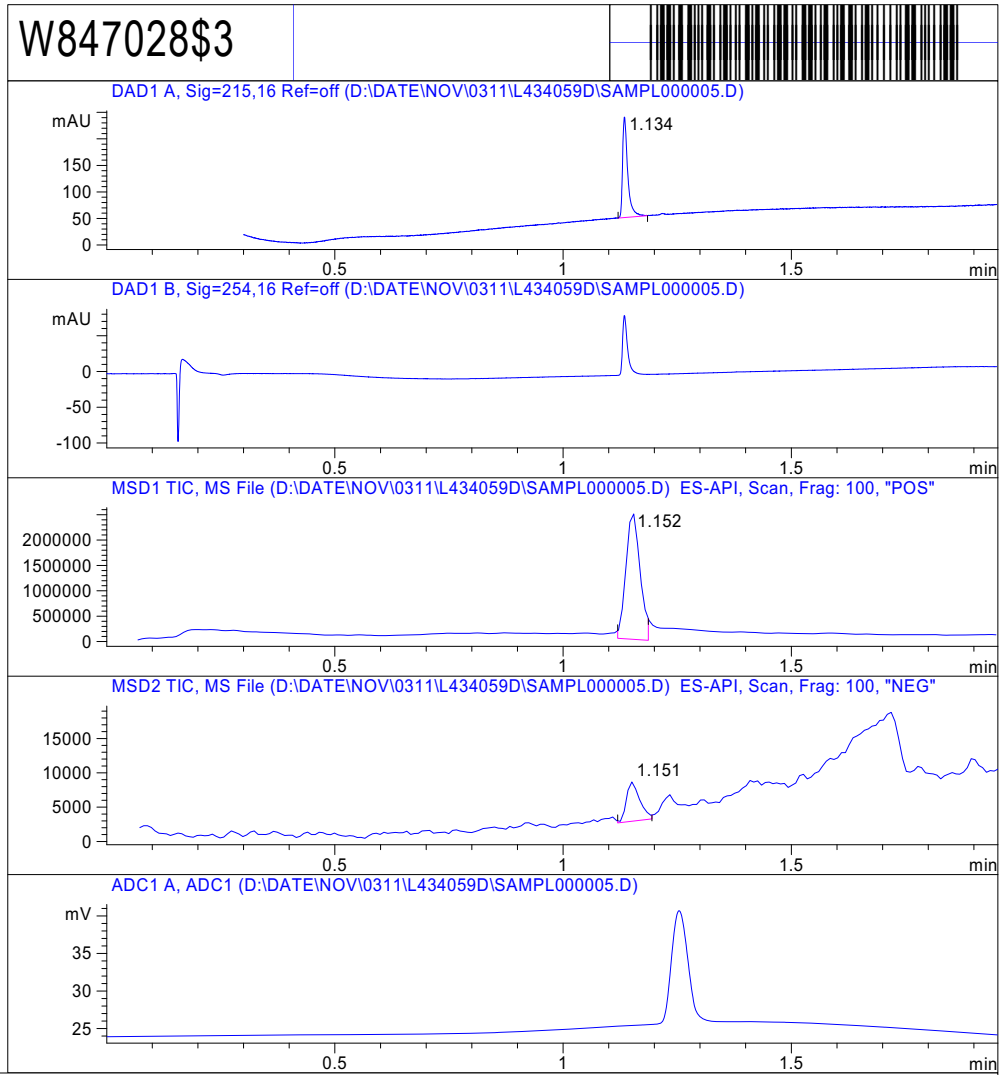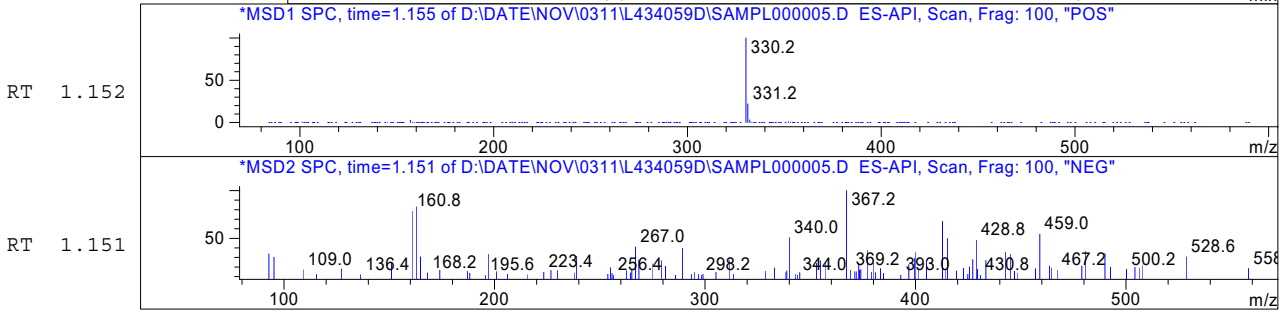

MaxPeak: 100.00%  
Ret\_Time: 1.373 min

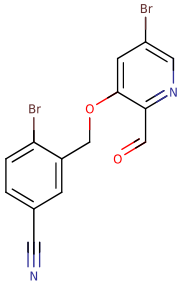

**Mol Wt** 396.03  
**Exact Mass** 395.9

| # | Time  | Area%  |
|---|-------|--------|
| 1 | 1.373 | 100.00 |

W753440\$1

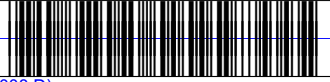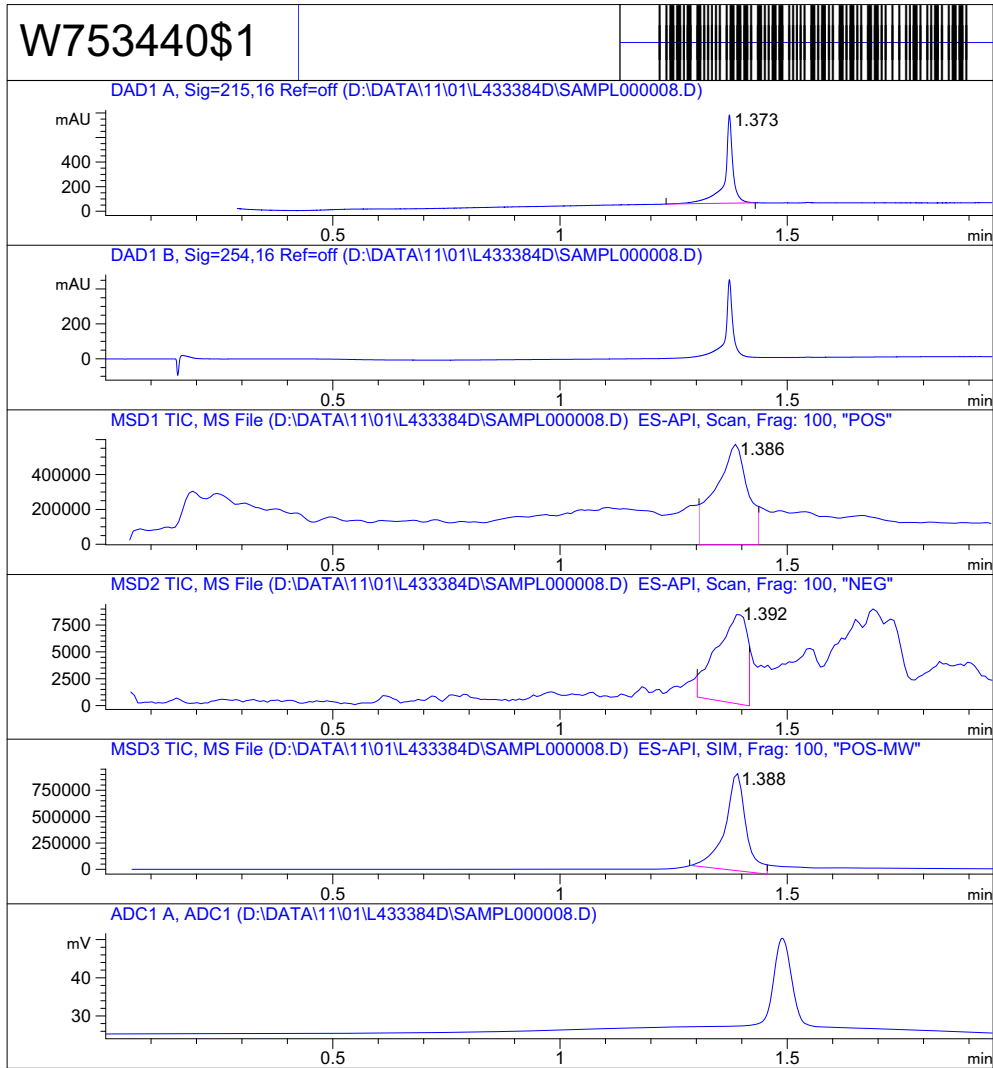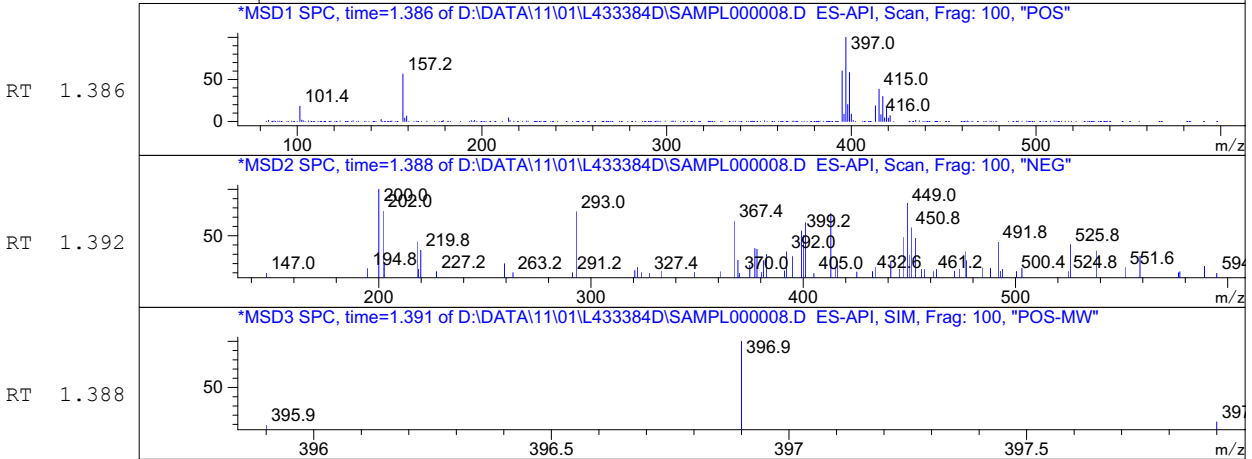

MaxPeak: 100.00%  
Ret\_Time: 0.976 min

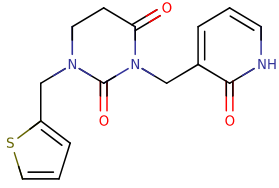

Mol Wt 317.36  
Exact Mass 317.09

| # | Time  | Area%  |
|---|-------|--------|
| 1 | 0.976 | 100.00 |

W847029\$1

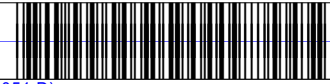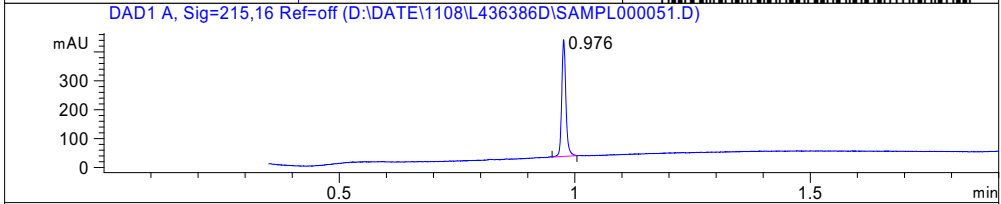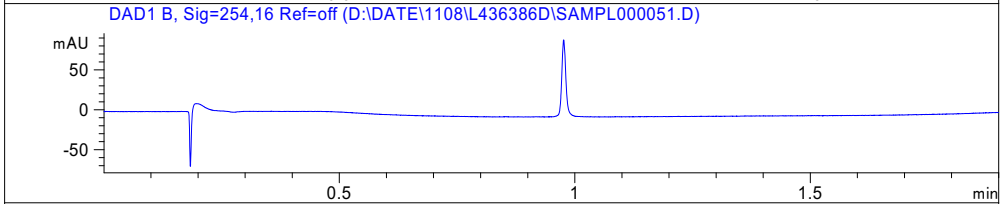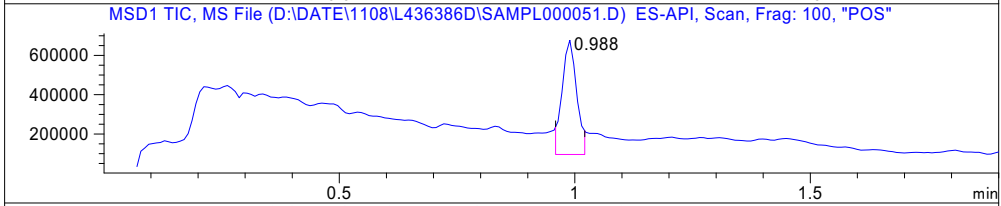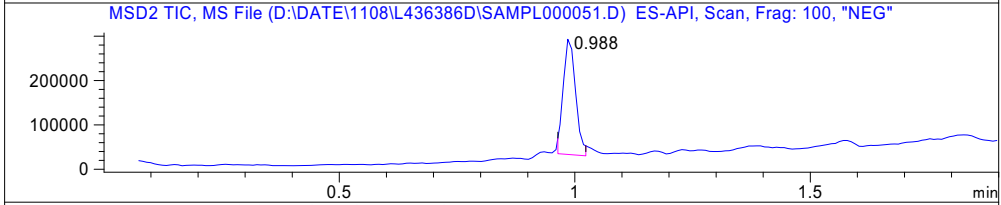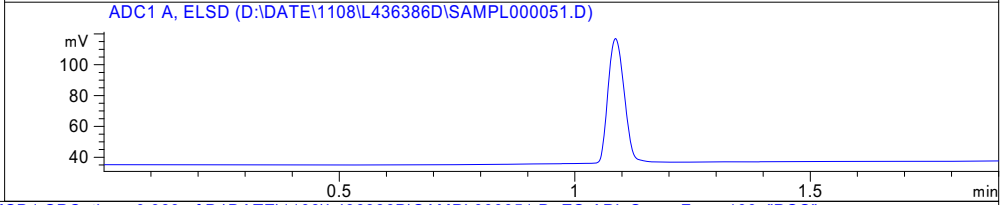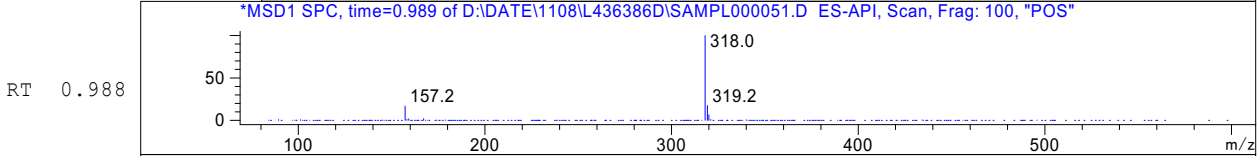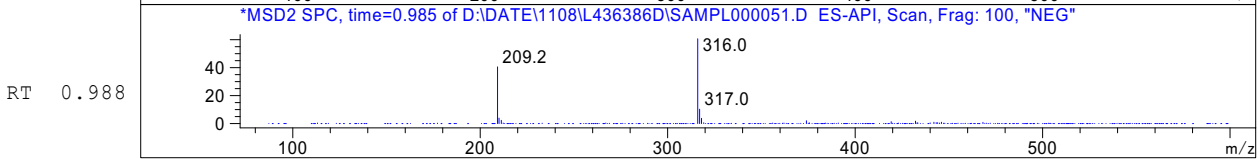

W980739\$2

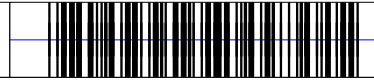

MaxPeak: 92.20%  
Ret\_Time: 0.990 min

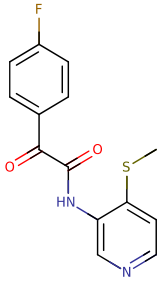

Mol Wt 290.31  
Exact Mass 290.06

| # | Time  | Area% |
|---|-------|-------|
| 1 | 0.852 | 7.80  |
| 2 | 0.990 | 92.20 |

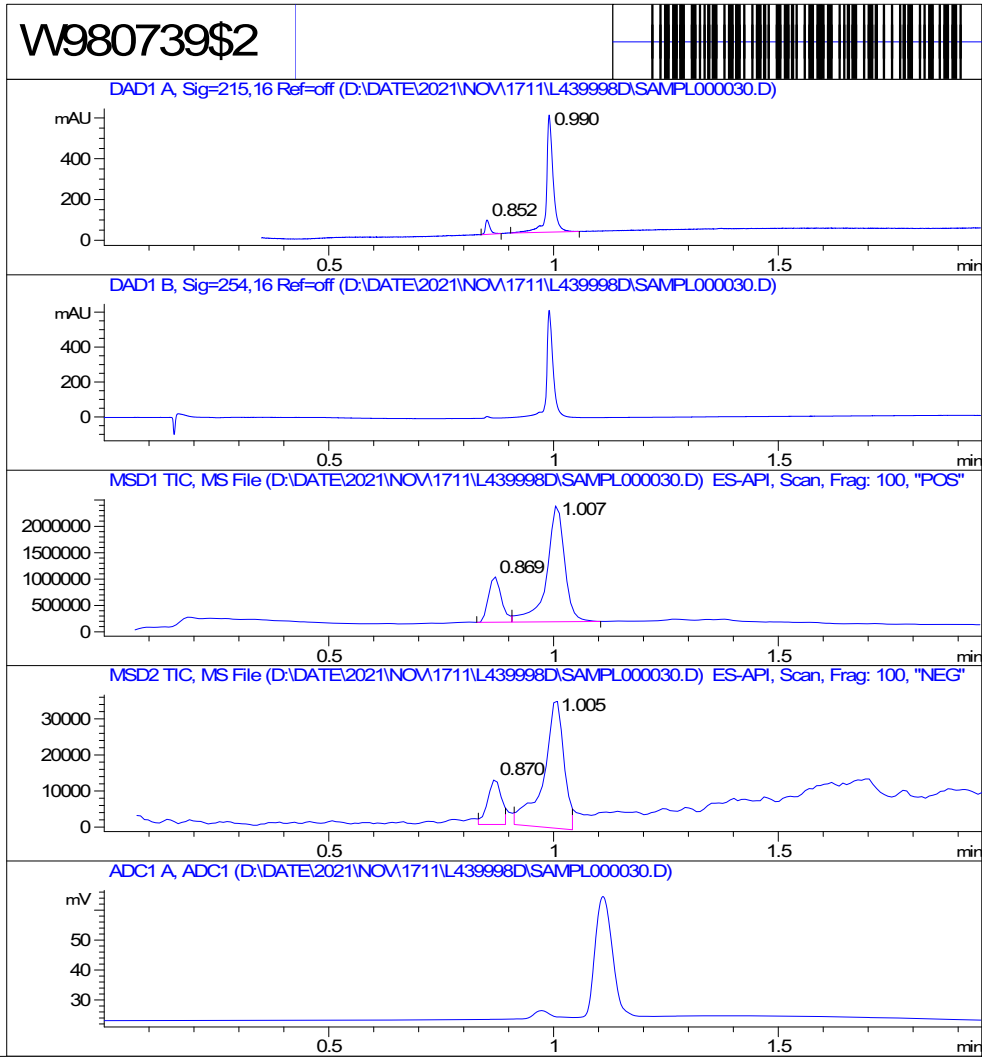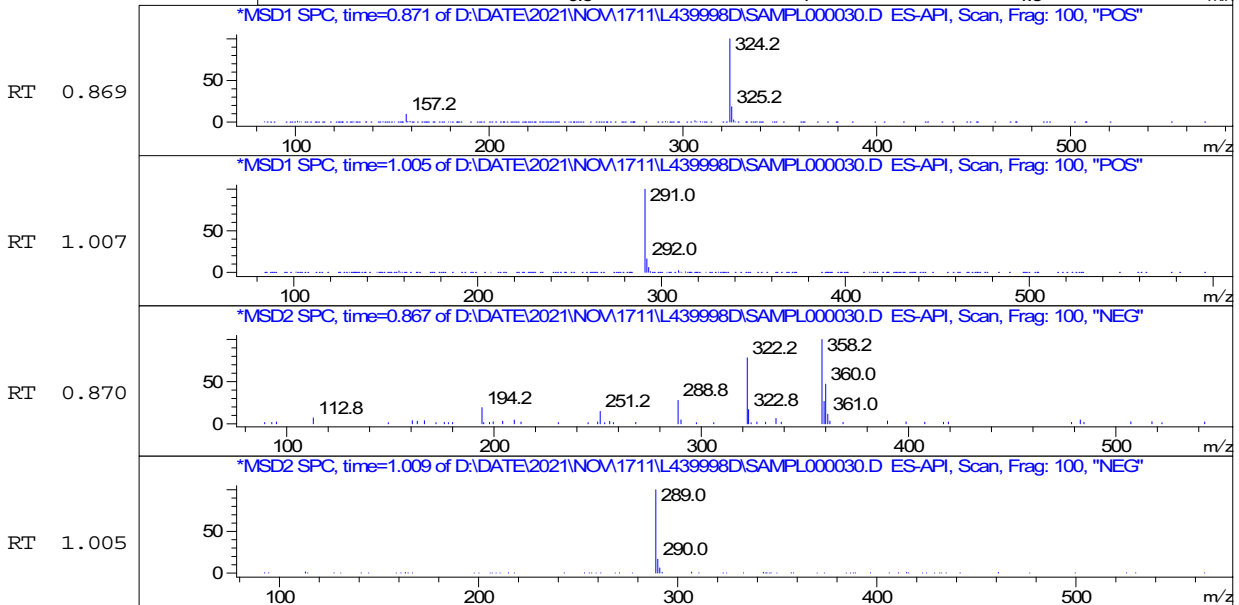

Inj.Date 17-Nov-21

A

P2-D-03

- 4 -

Acq. Method C:\CHEM32\ -> ->

Z1669286714\_

W980702\$6

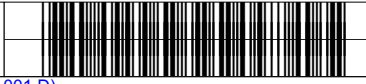

MaxPeak: 97.88%  
Ret\_Time: 1.052 min

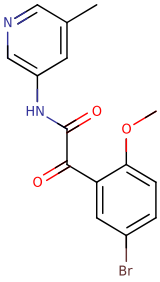

Mol Wt 349.18  
Exact Mass 348.02

| # | Time  | Area% |
|---|-------|-------|
| 1 | 1.052 | 97.88 |
| 2 | 1.180 | 2.12  |

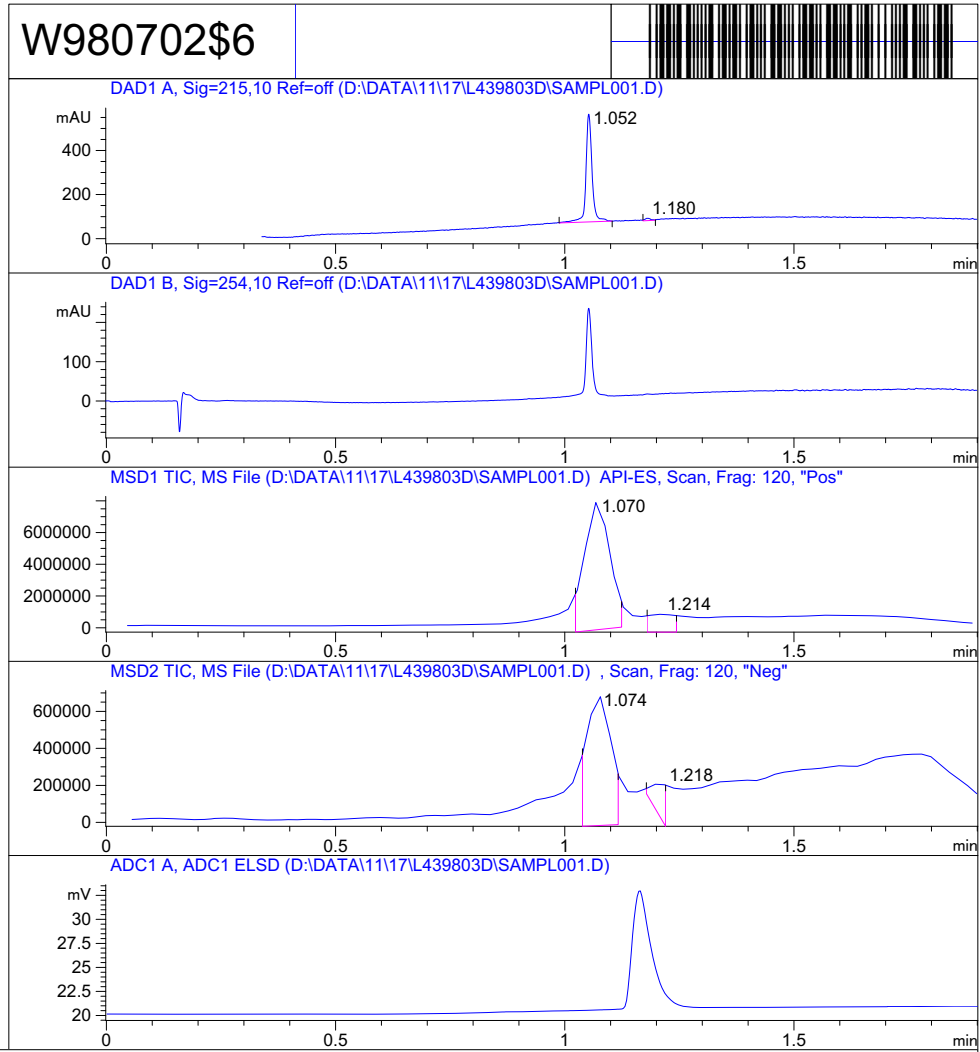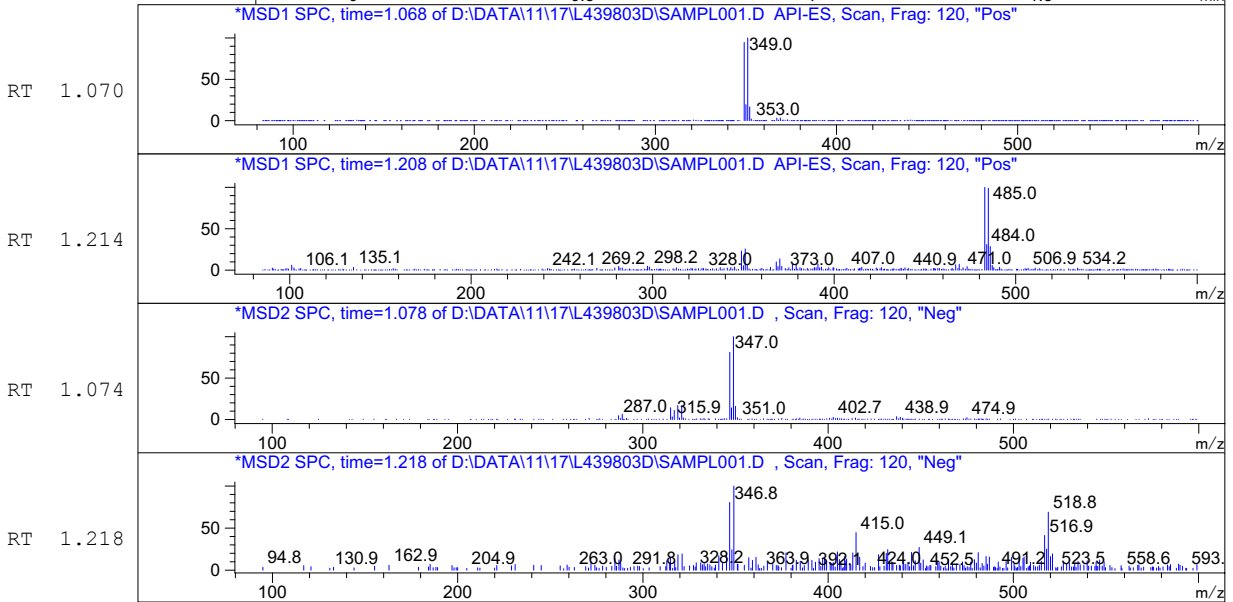

Inj.Date 11/17/2021

LB

-SL-

Acq. Method C:\HPCHEM\> >

Z1355254448\_

W980607\$1

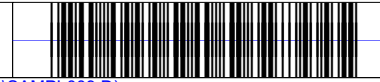

MaxPeak: 100.00%  
Ret\_Time: 1.368 min

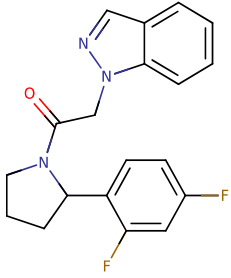

Mol Wt 341.36  
Exact Mass 341.16

| # | Time  | Area%  |
|---|-------|--------|
| 1 | 1.368 | 100.00 |

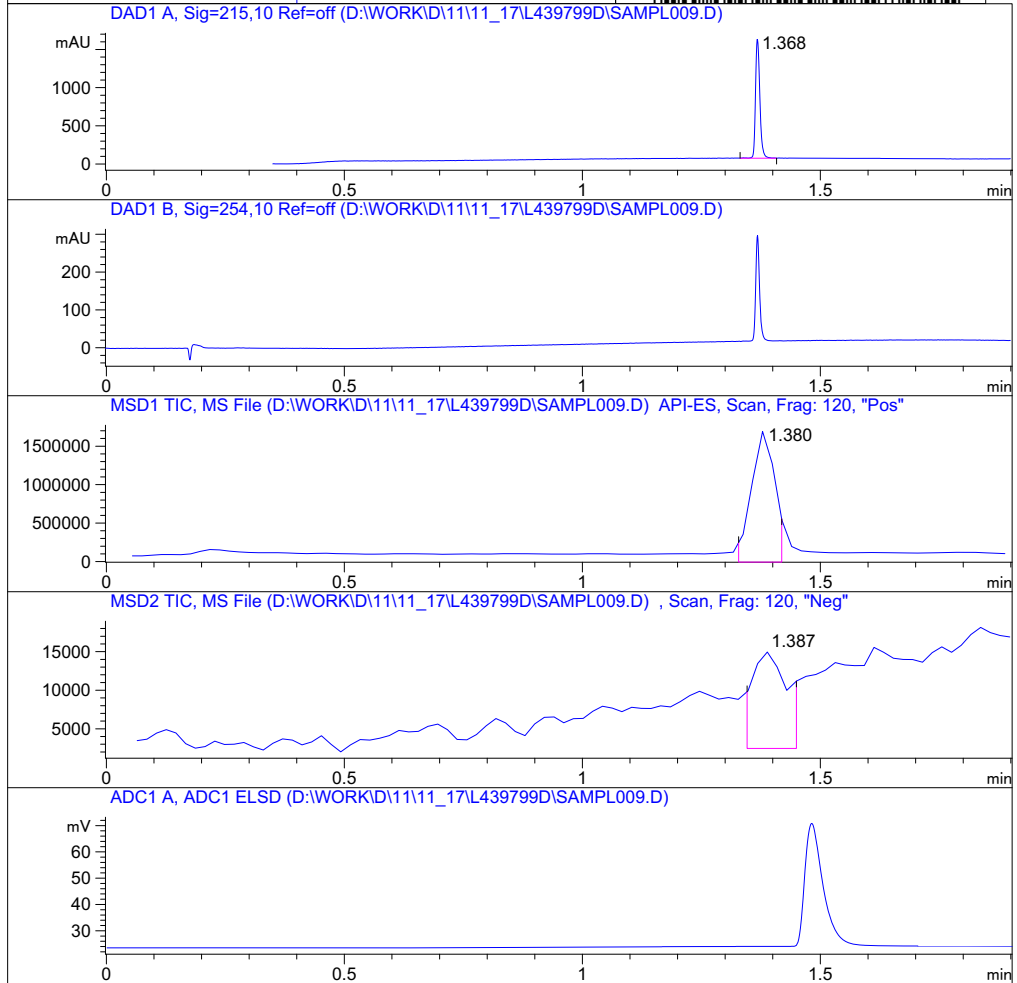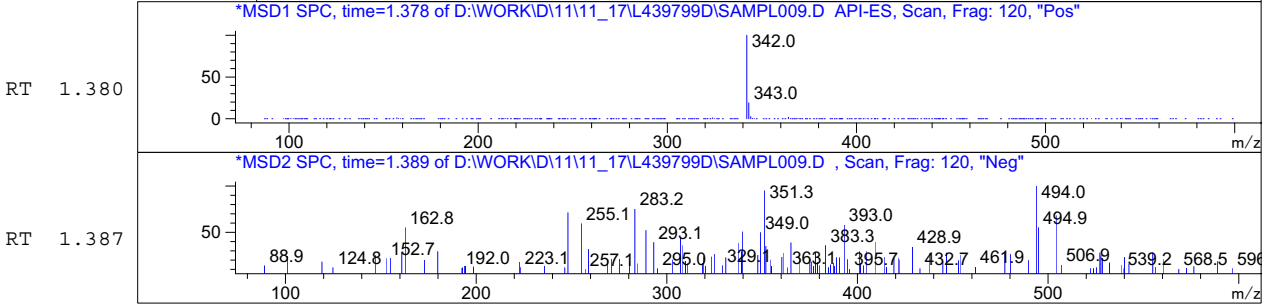

Inj.Date 11/17/2021

K

P2-A-09

-VL-

Acq. Method C:\HPCHEM\ -> ->

Z2298806057\_

MaxPeak: 100.00%  
Ret\_Time: 1.258 min

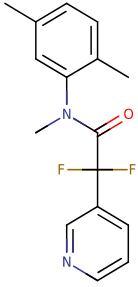

Mol Wt 290.31  
Exact Mass 290.15

| # | Time  | Area%  |
|---|-------|--------|
| 1 | 1.258 | 100.00 |

W980611\$2

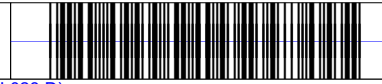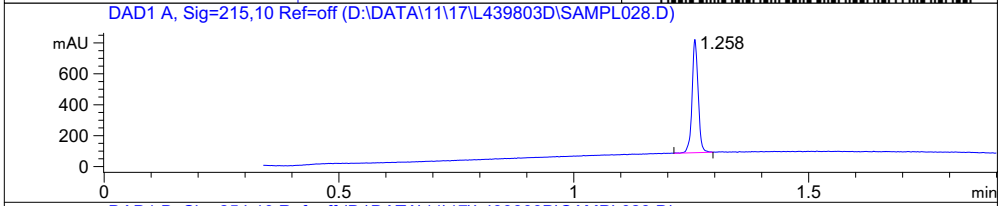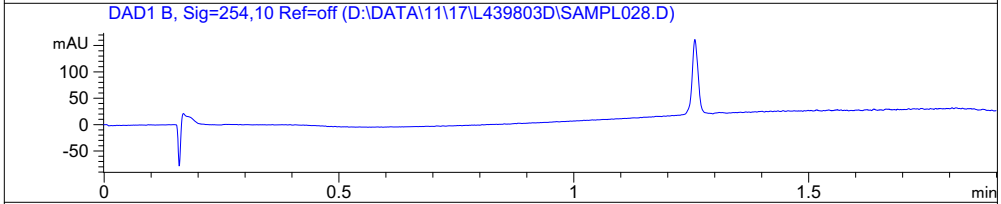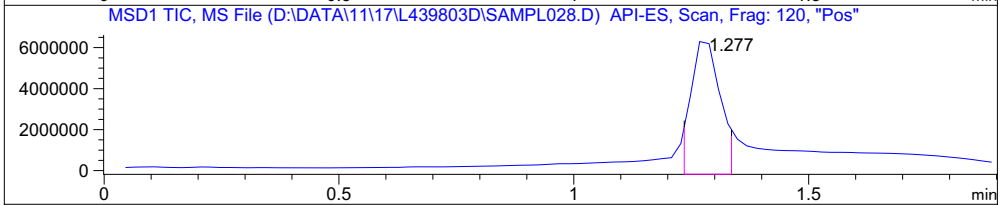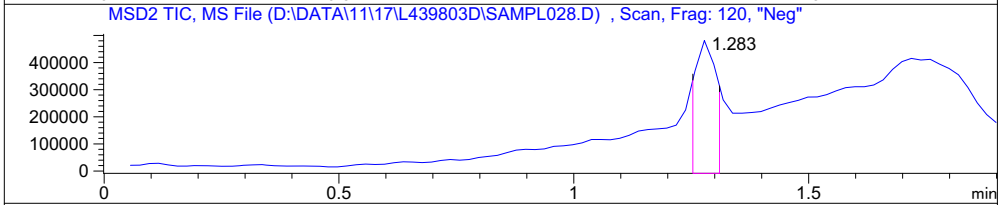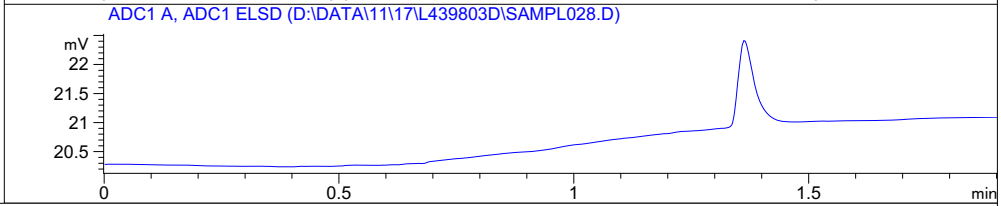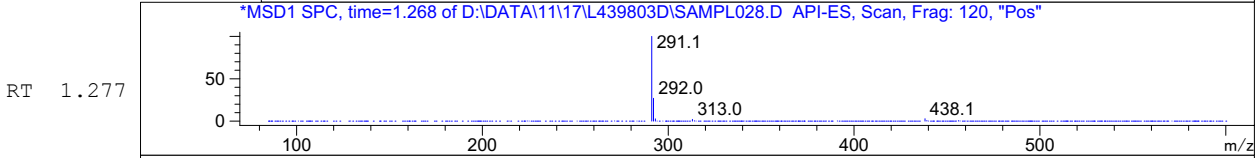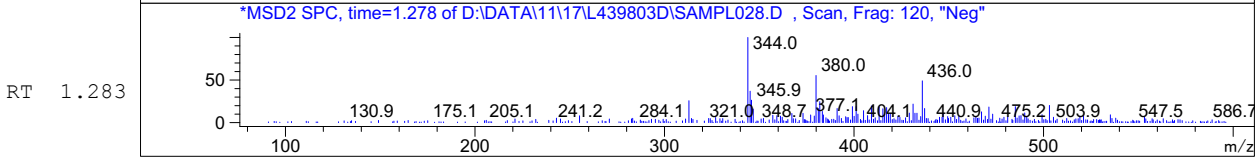

Inj.Date 11/17/2021

LB

-SL-

Acq. Method C:\HPCHEM\ -> ->

Z3079159560\_



MaxPeak: 100.00%  
Ret\_Time: 1.369 min

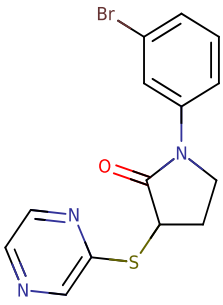

Mol Wt 350.23  
Exact Mass 351

| # | Time  | Area%  |
|---|-------|--------|
| 1 | 1.369 | 100.00 |

W980703\$1

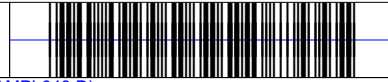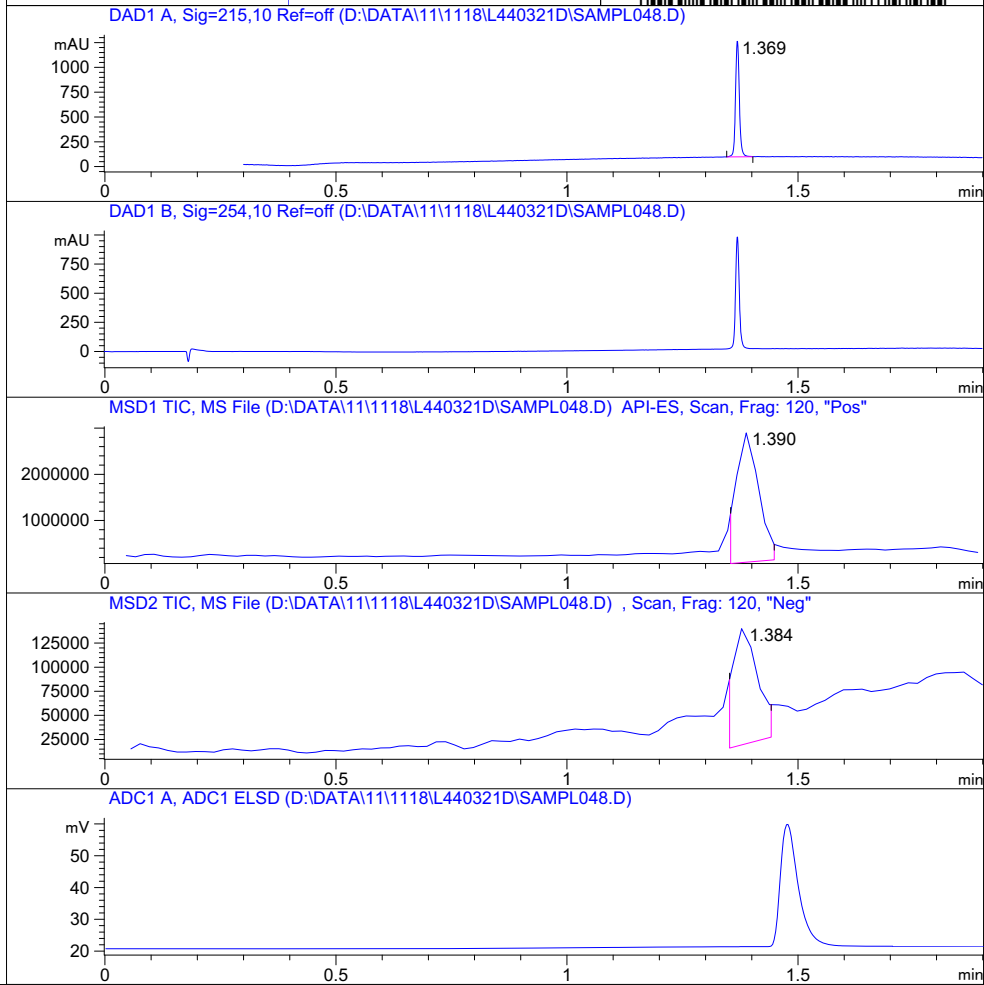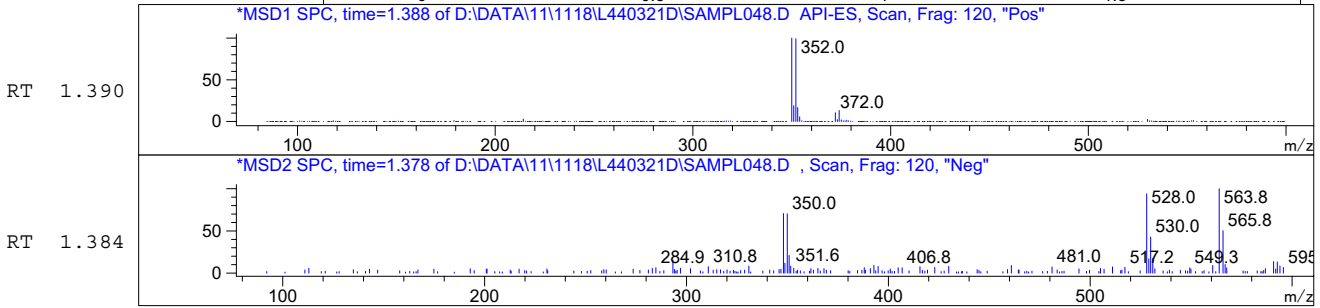

Inj.Date 11/18/2021

LT

-SL-

Acq. Method C:\HPCHEM\ -> ->

Z1872042935\_

MaxPeak: 100.00%  
Ret\_Time: 1.079 min

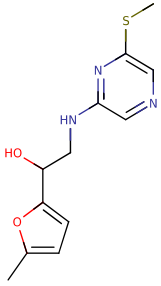

Mol Wt 265.33  
Exact Mass 265.1

| # | Time  | Area%  |
|---|-------|--------|
| 1 | 1.079 | 100.00 |

W980679\$3

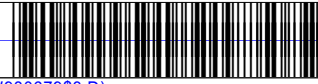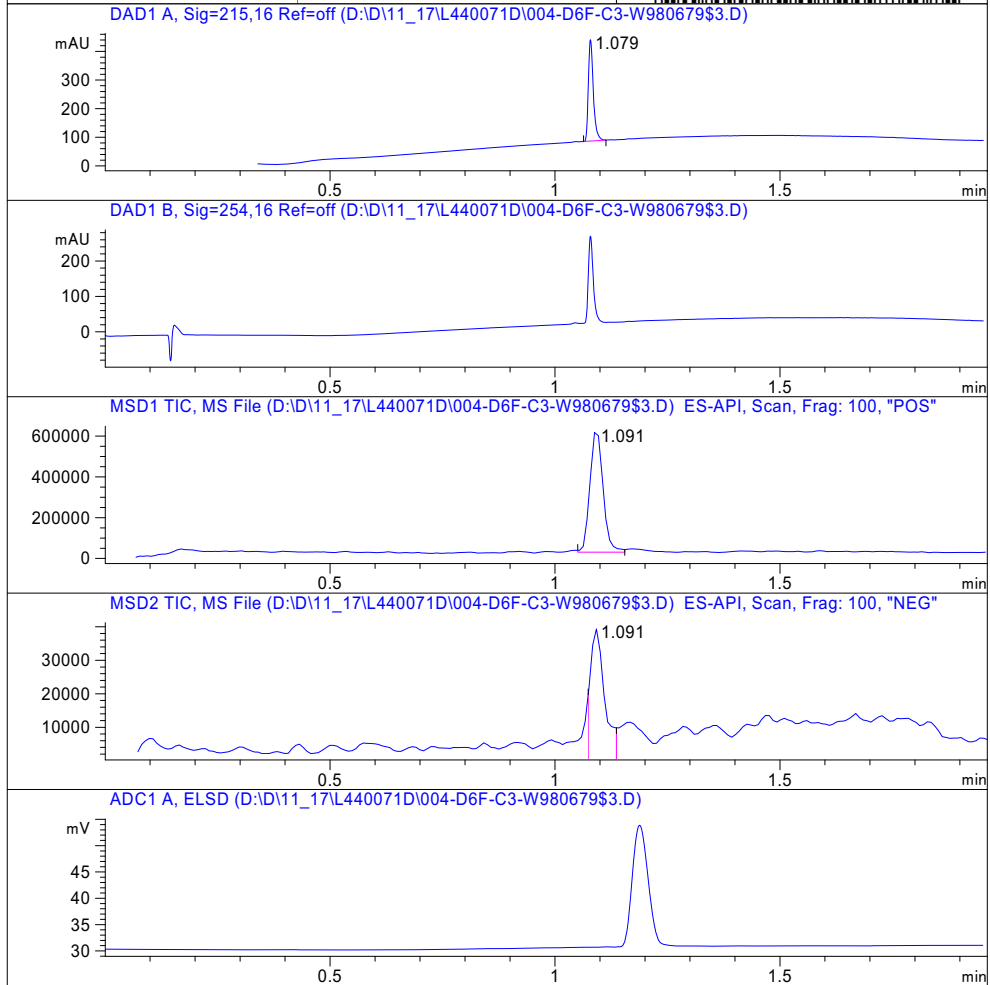

RT 1.091

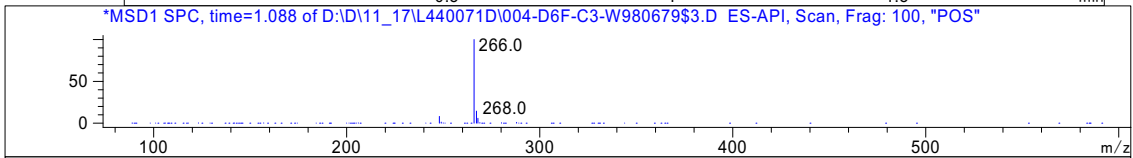

RT 1.091

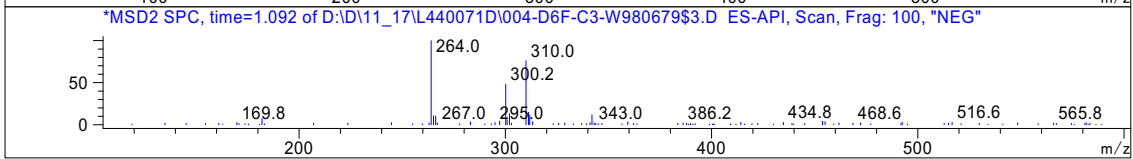

MaxPeak: 98.67%  
Ret\_Time: 0.847 min

# W980675\$3

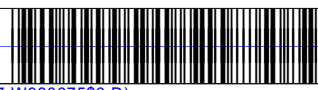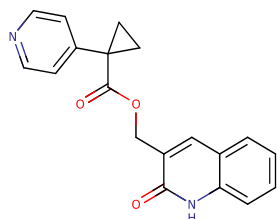

**Mol Wt** 320.34  
**Exact Mass** 320.13

| # | Time  | Area% |
|---|-------|-------|
| 1 | 0.725 | 1.33  |
| 2 | 0.847 | 98.67 |

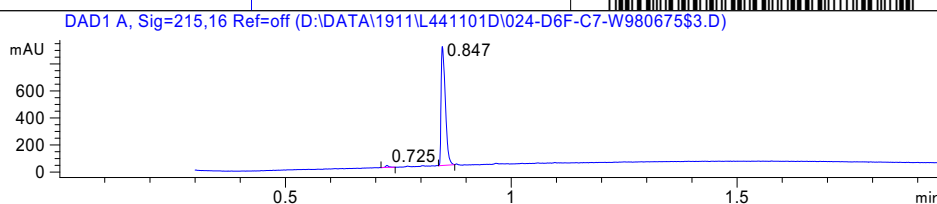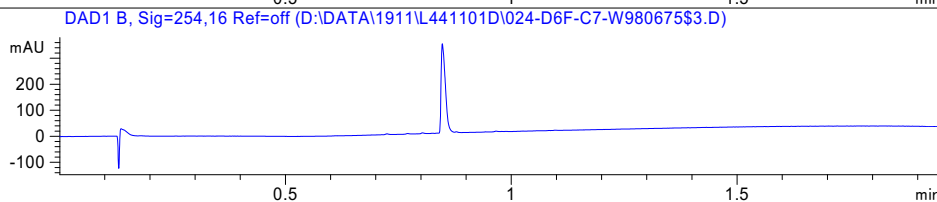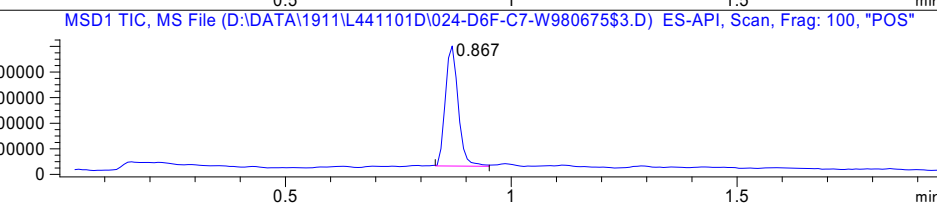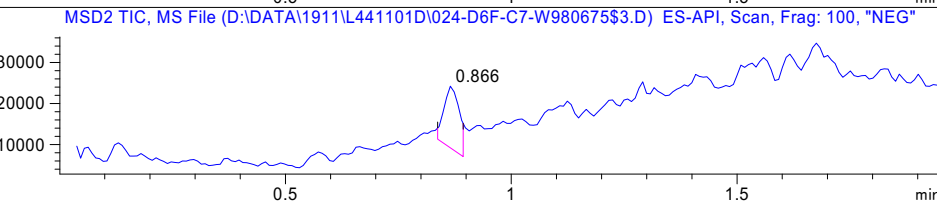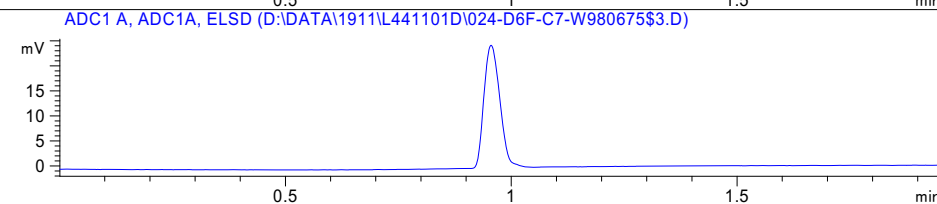

RT 0.867

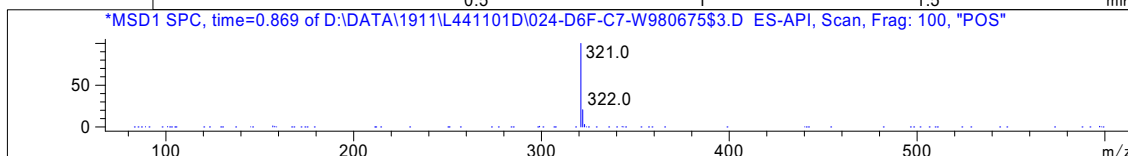

RT 0.866

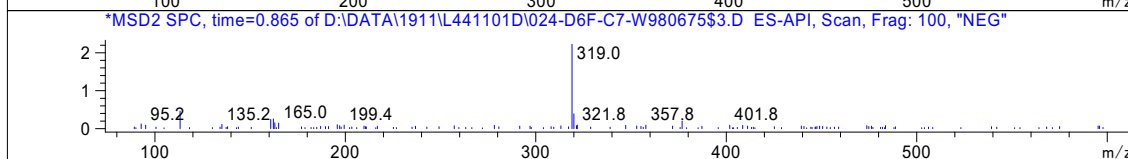

MaxPeak: 100.00%  
Ret\_Time: 1.150 min

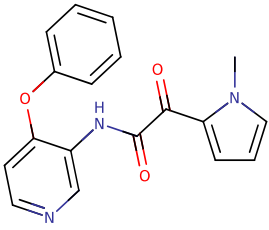

Mol Wt 321.33  
Exact Mass 321.12

| # | Time  | Area%  |
|---|-------|--------|
| 1 | 1.150 | 100.00 |

W980606\$8

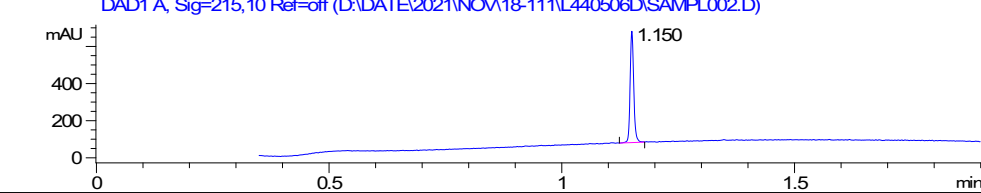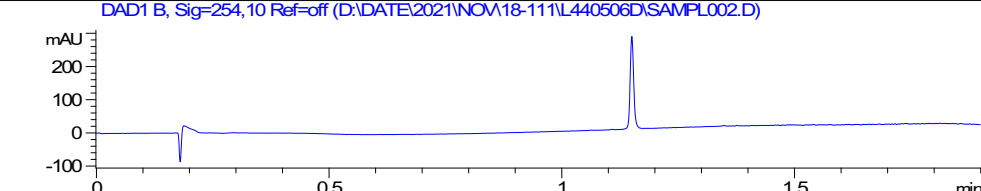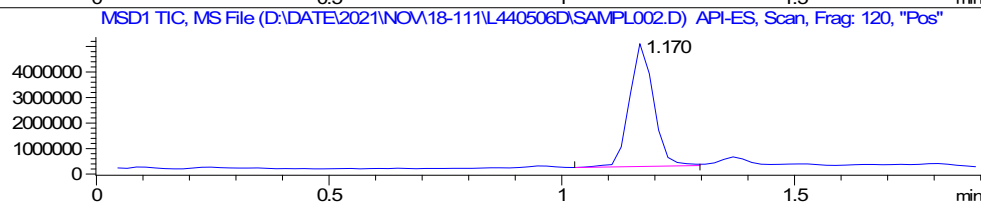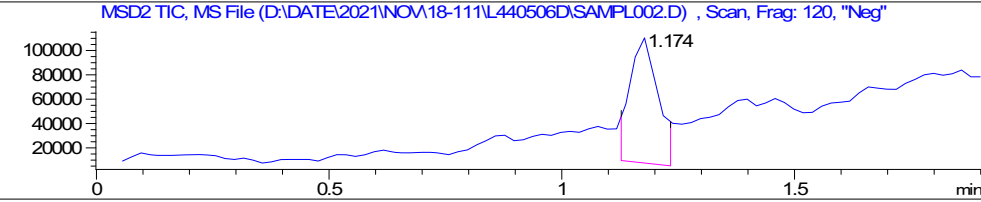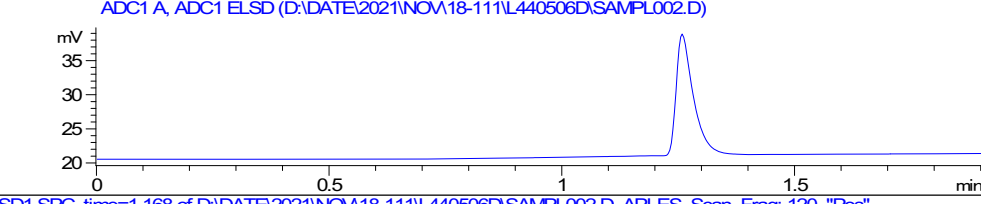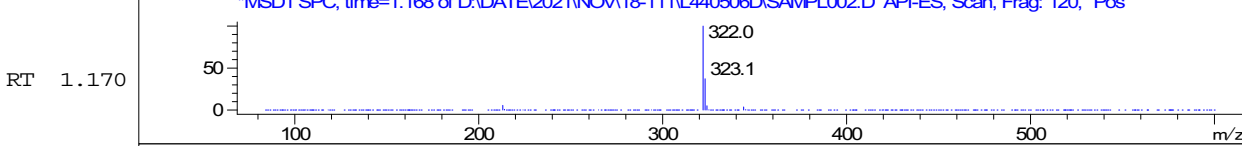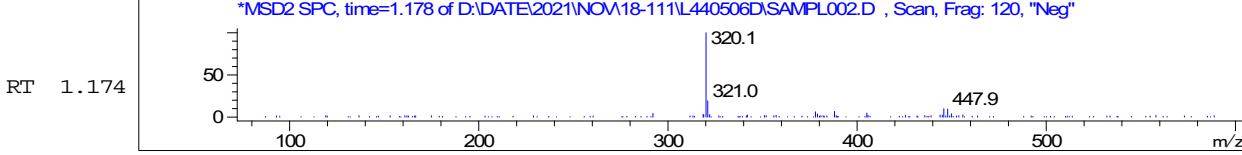

Inj.Date 18-Nov-21

A

P2-A-02

-SL-

Acq. Method C:\HPCHEM\ -> ->

Z2195811405\_

MaxPeak: 100.00%  
Ret\_Time: 1.363 min

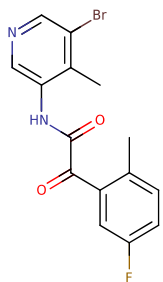

Mol Wt 351.17  
Exact Mass 350.02

| # | Time  | Area%  |
|---|-------|--------|
| 1 | 1.363 | 100.00 |

W980620\$3

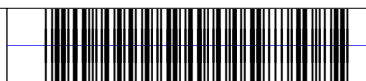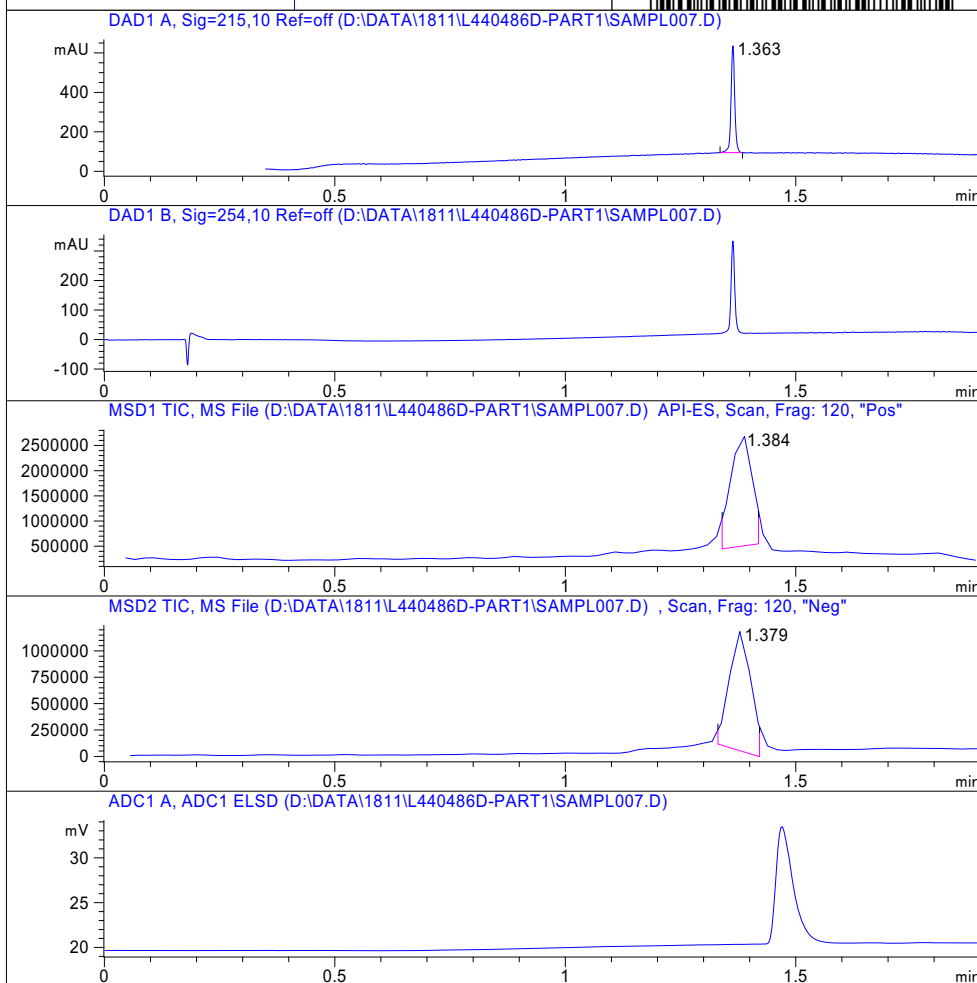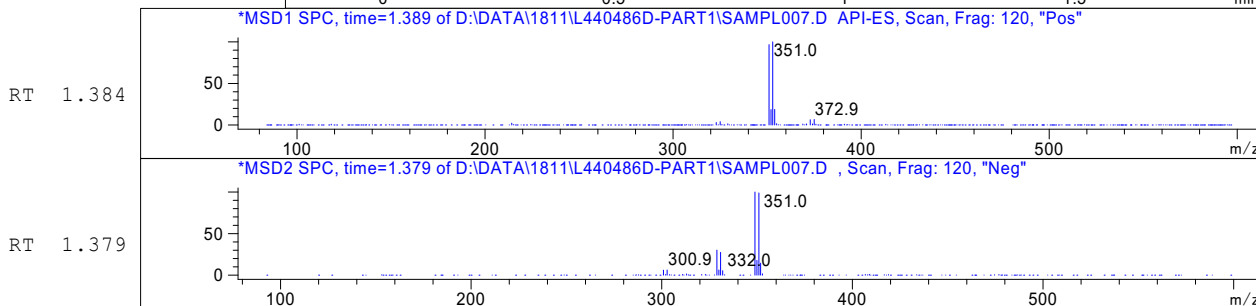

Inj.Date 11/18/2021

H

-SL-

Acq. Method C:\HPCHEM\ ->

Z5420225795\_

W980749\$4

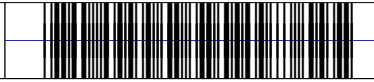

MaxPeak: 100.00%  
Ret\_Time: 0.876 min

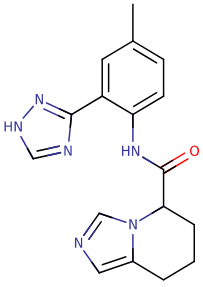

Mol Wt 322.36  
Exact Mass 322.17

| # | Time  | Area%  |
|---|-------|--------|
| 1 | 0.876 | 100.00 |

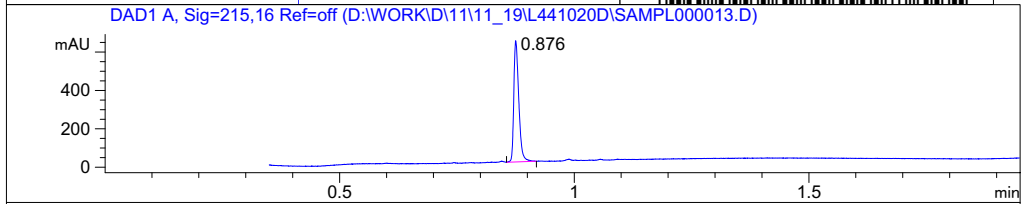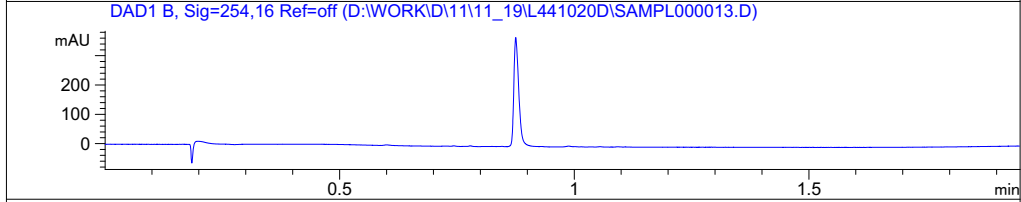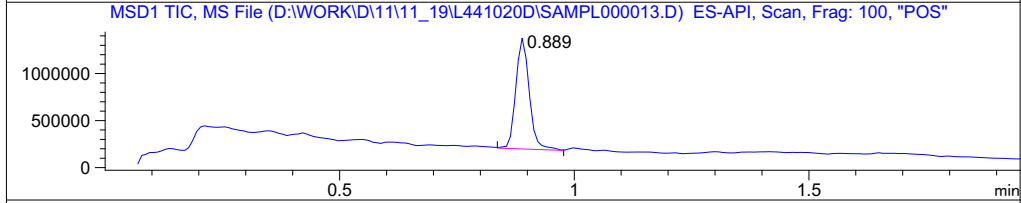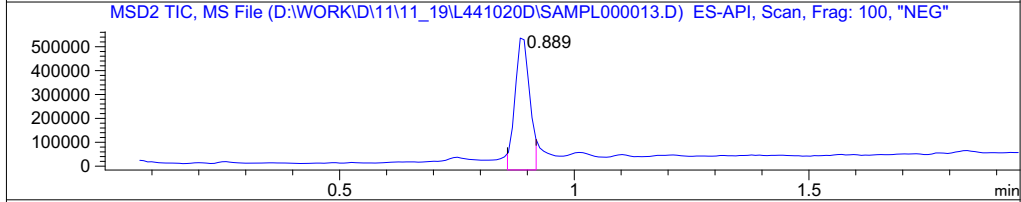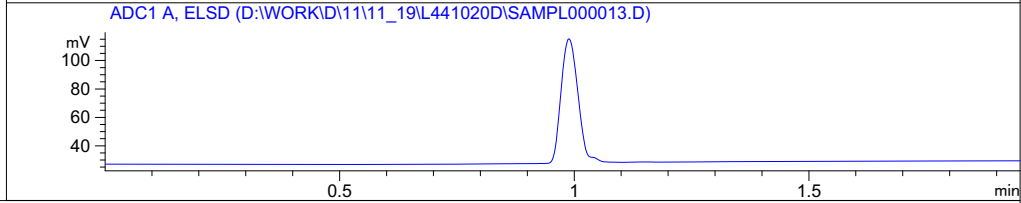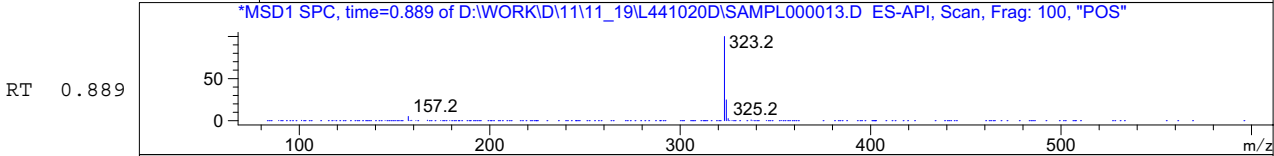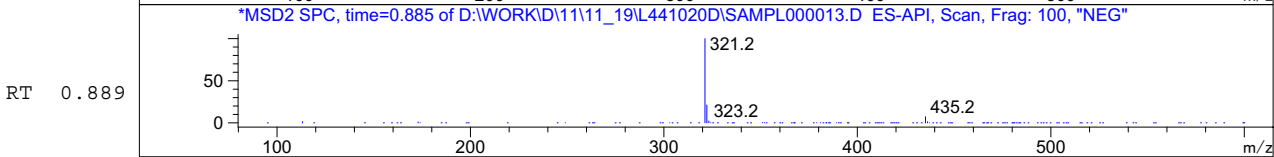

MaxPeak: 98.55%  
Ret\_Time: 1.202 min

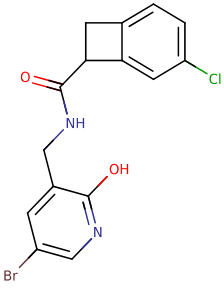

Mol Wt 367.62  
Exact Mass 367.99

| # | Time  | Area% |
|---|-------|-------|
| 1 | 1.080 | 1.45  |
| 2 | 1.202 | 98.55 |

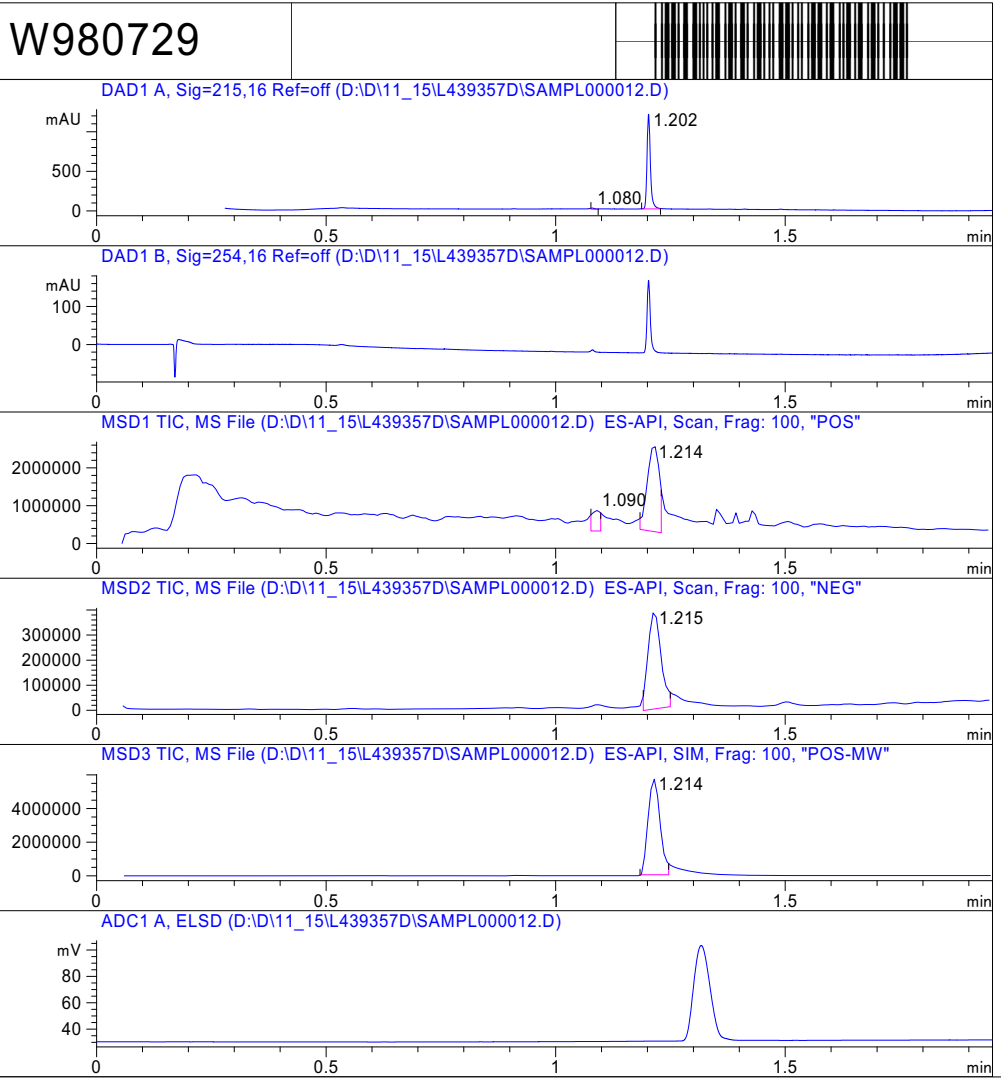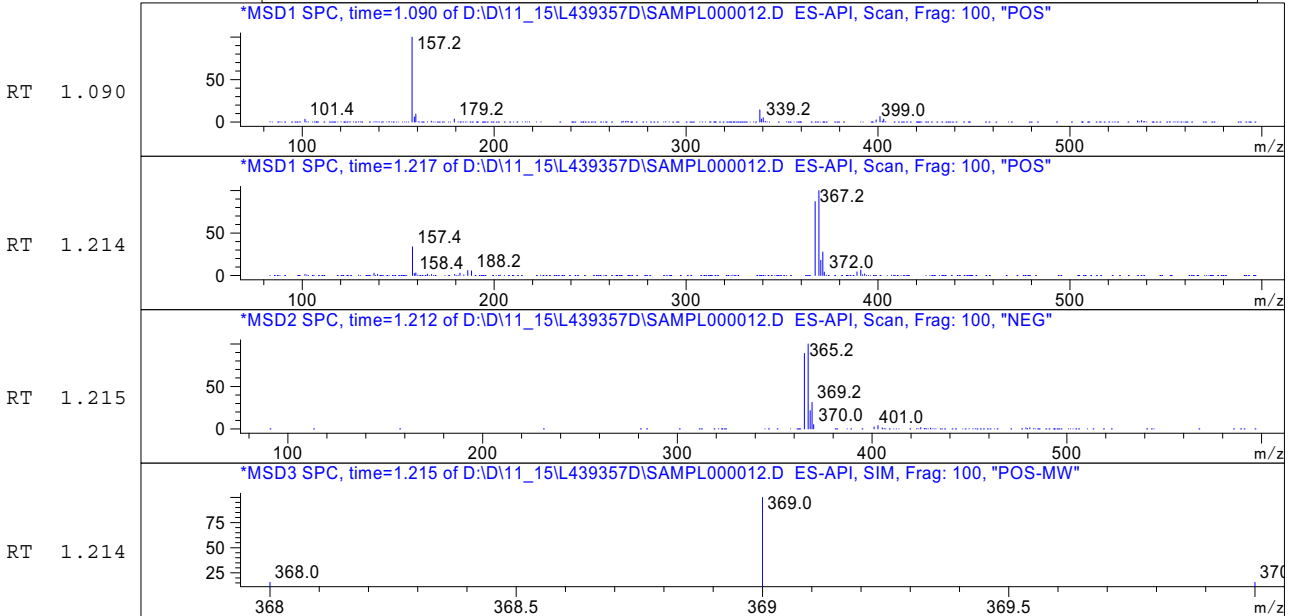

MaxPeak: 96.28%  
Ret\_Time: 1.319 min

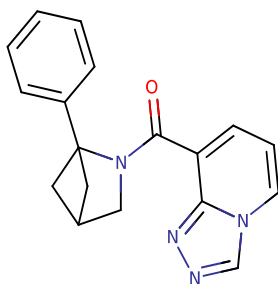

Mol Wt 304.35  
Exact Mass 304.15

| # | Time  | Area% |
|---|-------|-------|
| 1 | 0.998 | 1.94  |
| 2 | 1.166 | 1.79  |
| 3 | 1.319 | 96.28 |

X175457\$4

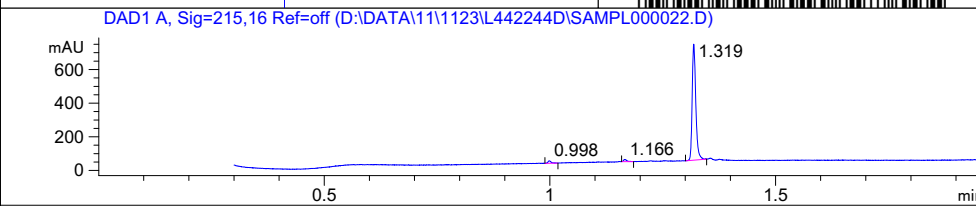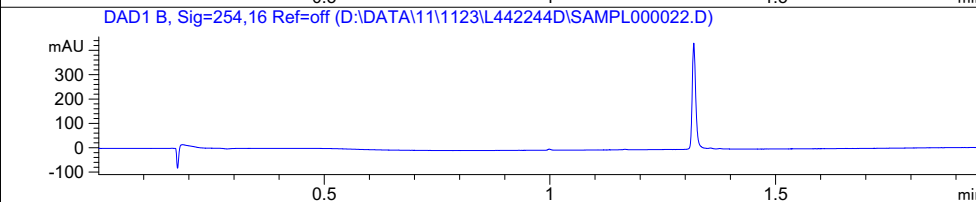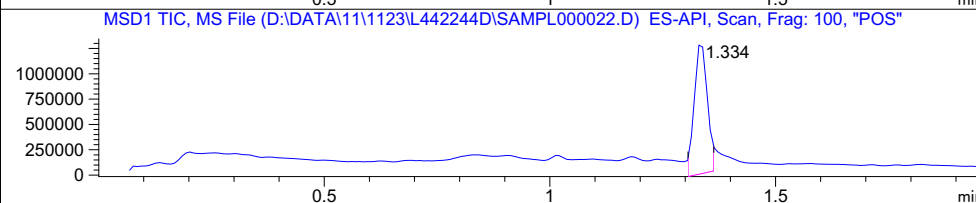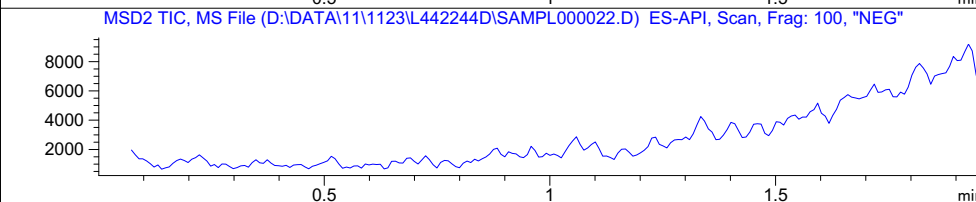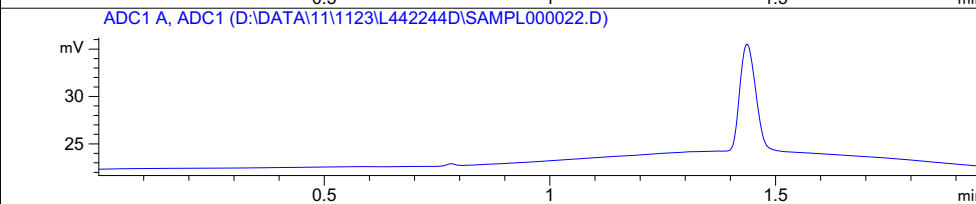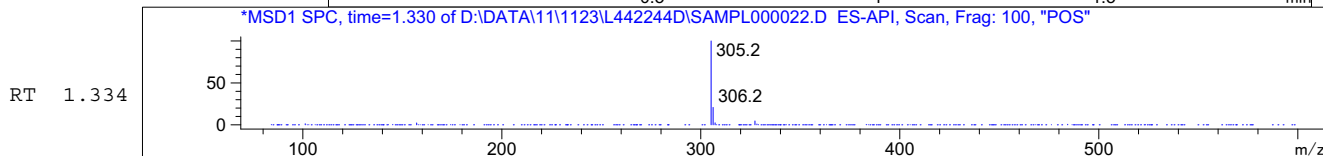



MaxPeak: 100.00%  
Ret\_Time: 0.909 min

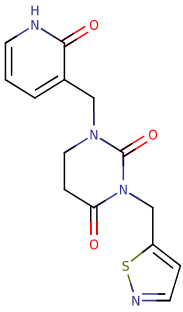

Mol Wt 318.35  
Exact Mass 318.08

| # | Time  | Area%  |
|---|-------|--------|
| 1 | 0.909 | 100.00 |

W980660\$2

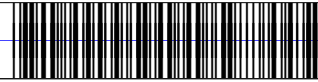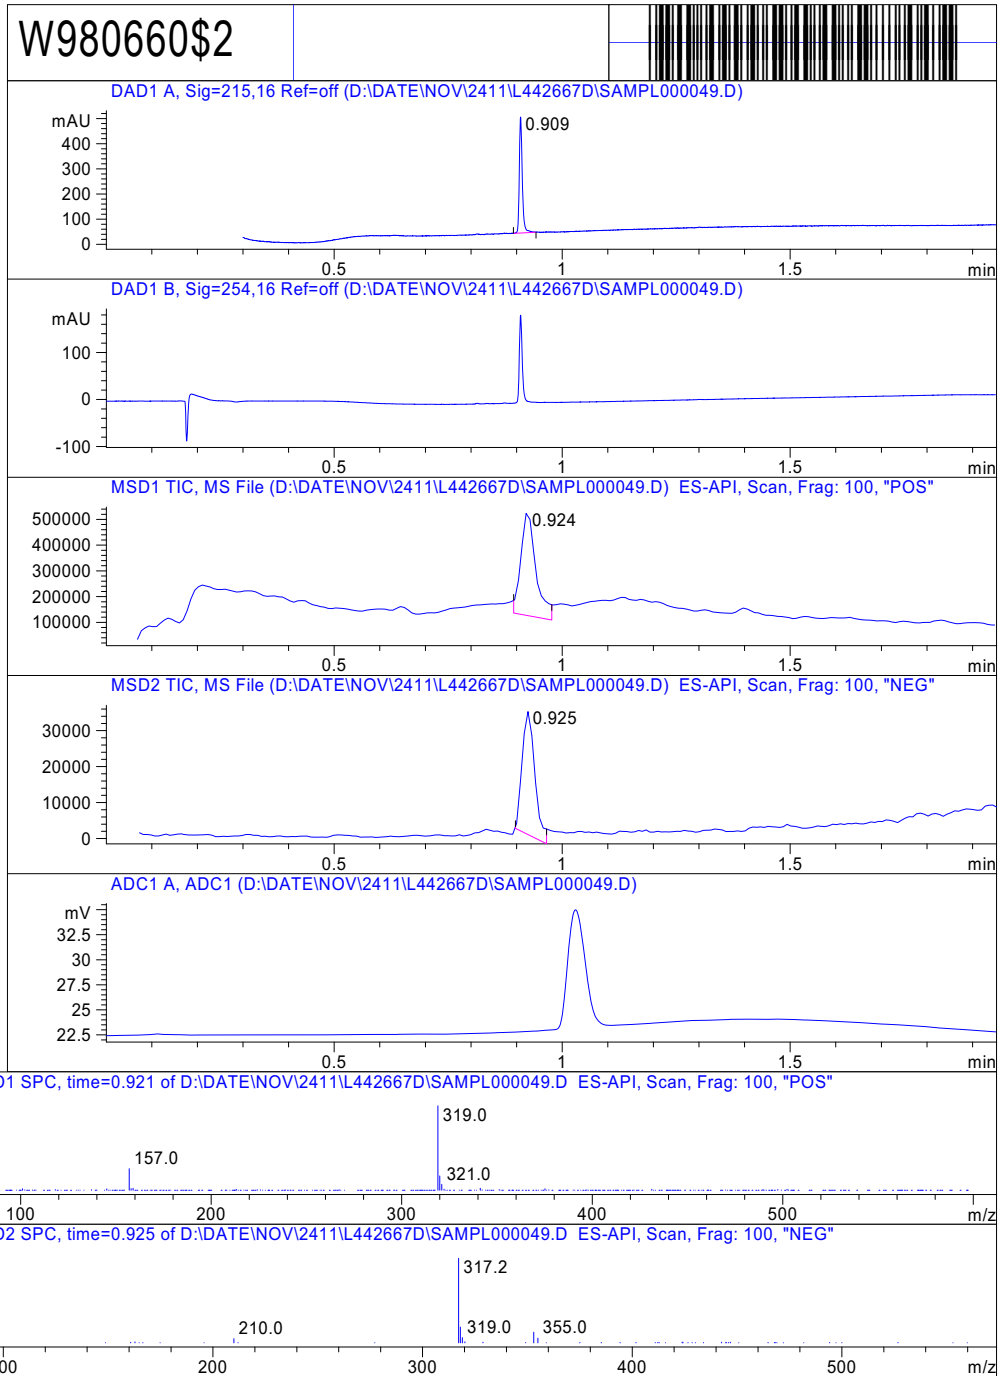

MaxPeak: 98.00%  
Ret\_Time: 0.869 min

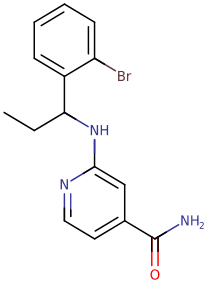

Mol Wt 334.21  
Exact Mass 333.07

| # | Time  | Area% |
|---|-------|-------|
| 1 | 0.869 | 98.00 |
| 2 | 1.040 | 2.00  |

X238577\$2

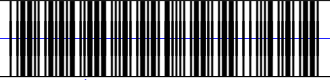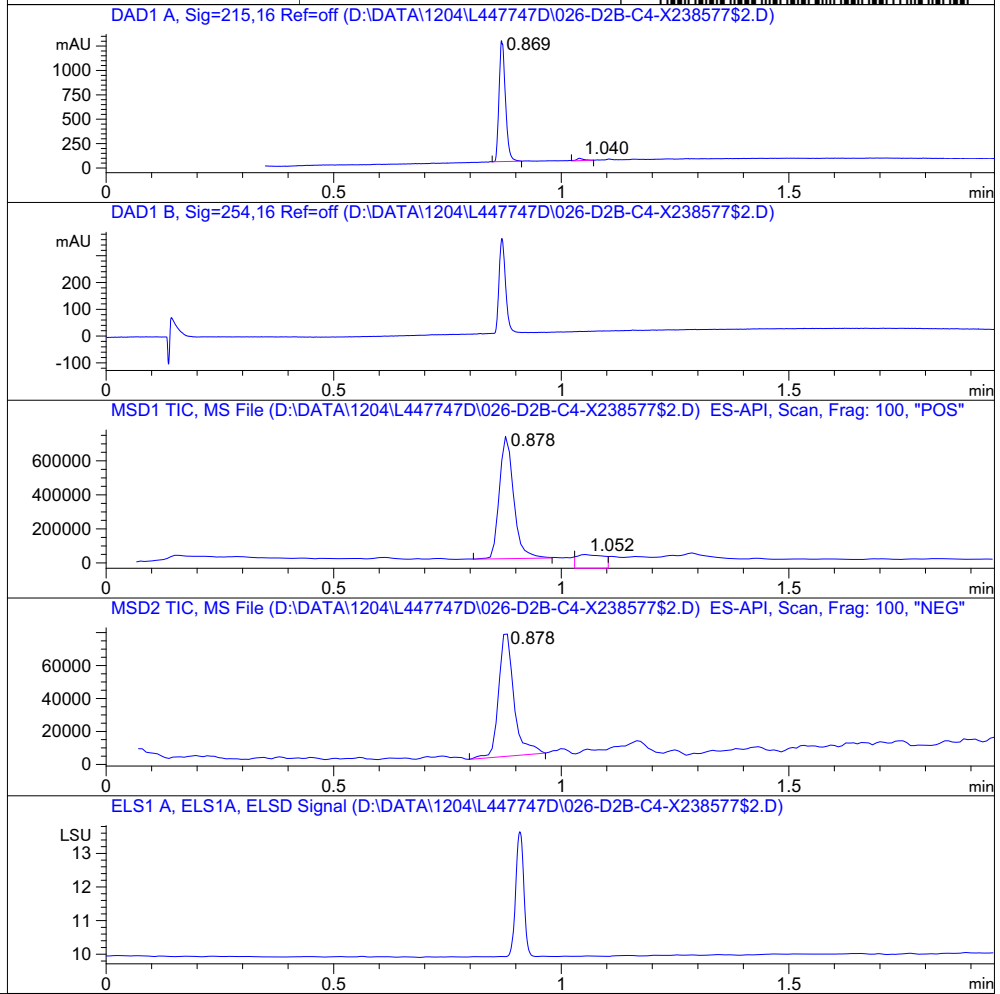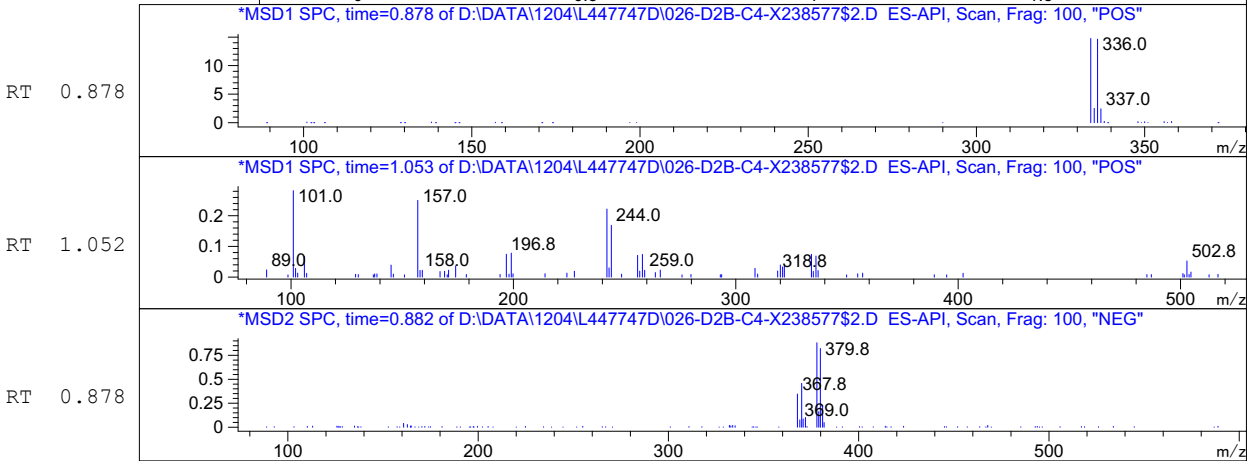

MaxPeak: 100.00%  
Ret\_Time: 0.589 min

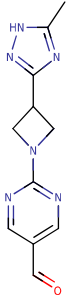

Mol Wt 244.25  
Exact Mass 244.11

| # | Time  | Area%  |
|---|-------|--------|
| 1 | 0.589 | 100.00 |

S993158\$1

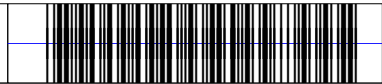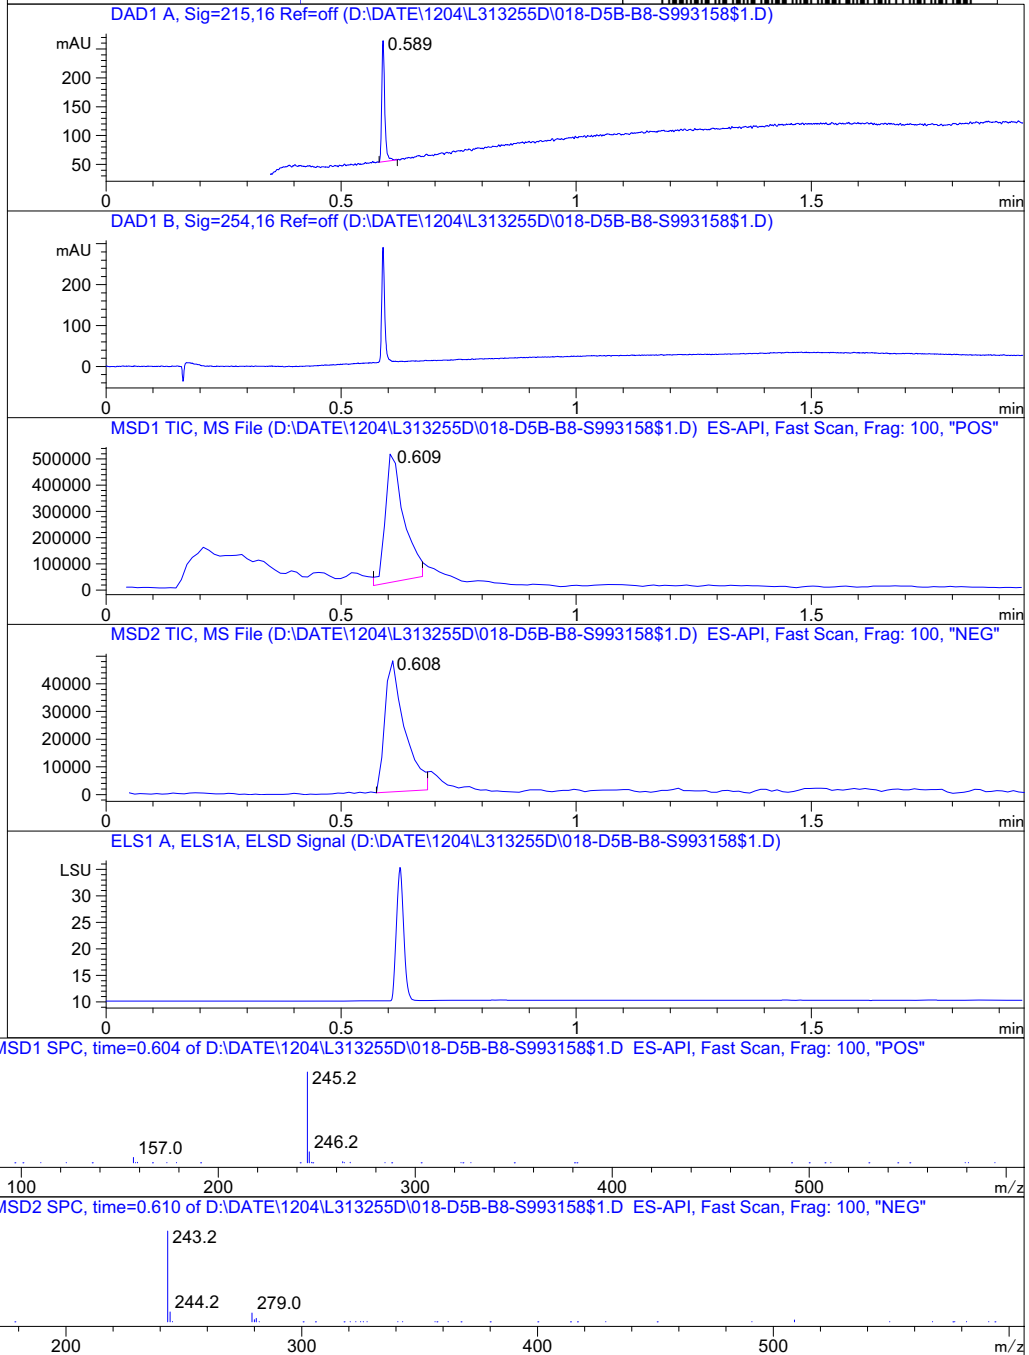

MaxPeak: 100.00%  
Ret\_Time: 0.781 min

U211096\$2

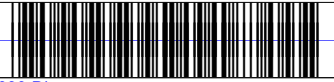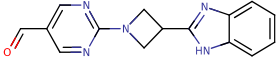

Mol Wt 279.3  
Exact Mass 279.12

| # | Time  | Area%  |
|---|-------|--------|
| 1 | 0.781 | 100.00 |

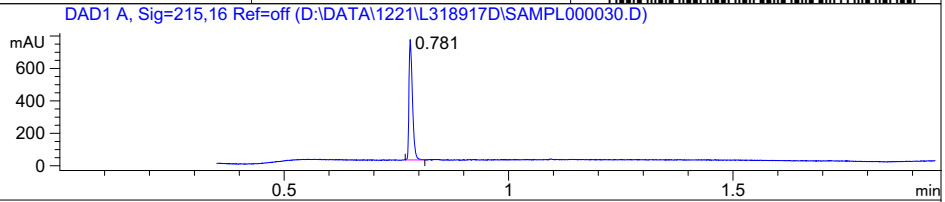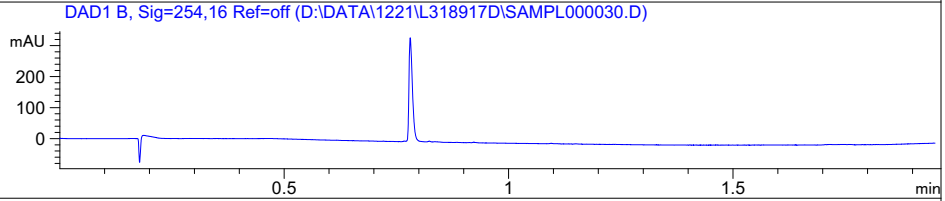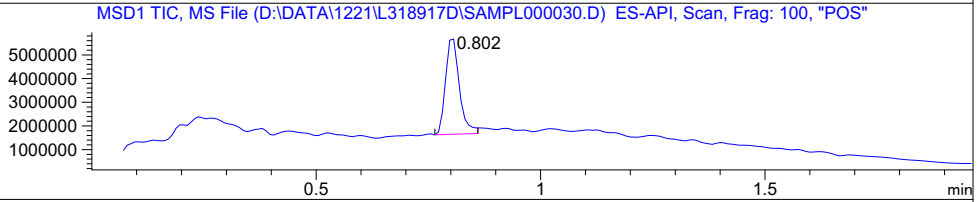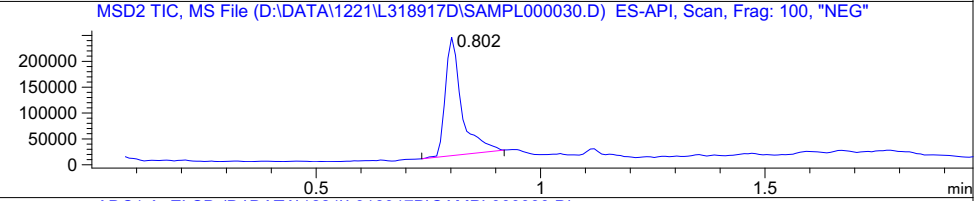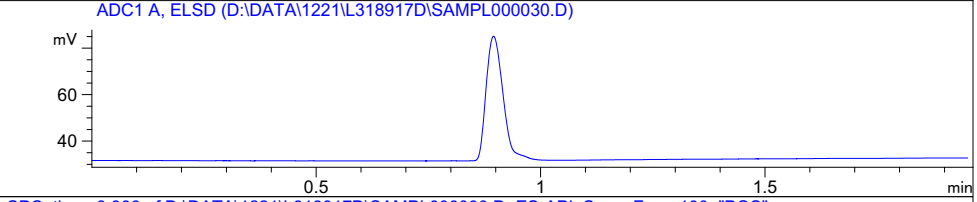

RT 0.802

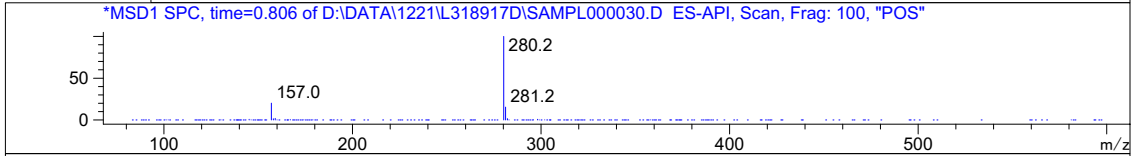

RT 0.802

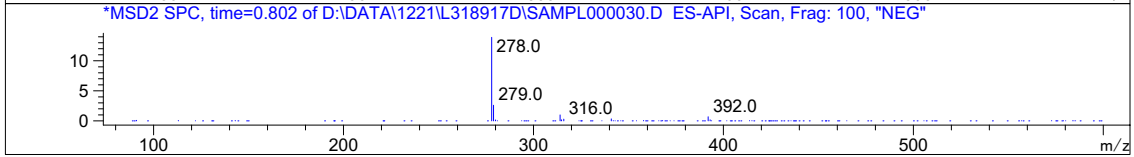

MaxPeak: 92.45%  
Ret\_Time: 1.228 min

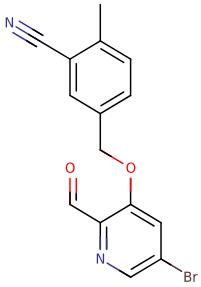

Mol Wt 331.16  
Exact Mass 330.01

| # | Time  | Area% |
|---|-------|-------|
| 1 | 1.228 | 92.45 |
| 2 | 1.378 | 5.40  |
| 3 | 1.787 | 2.15  |

U235907\$1

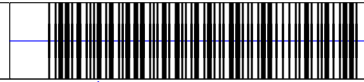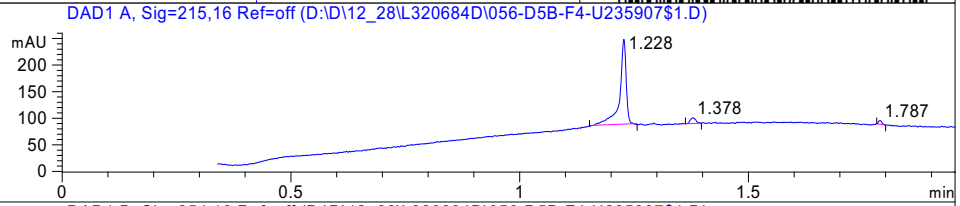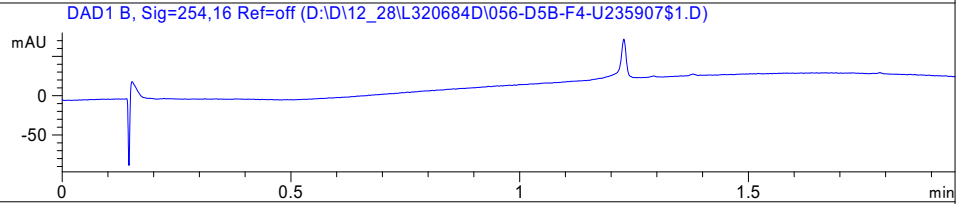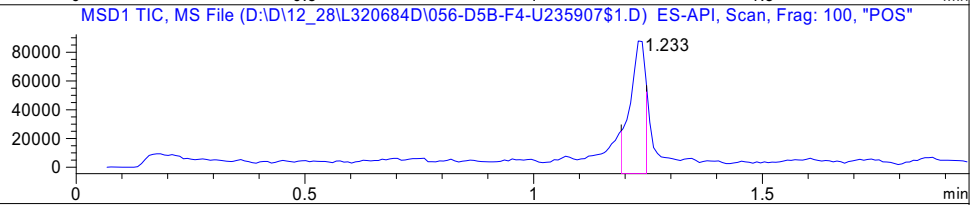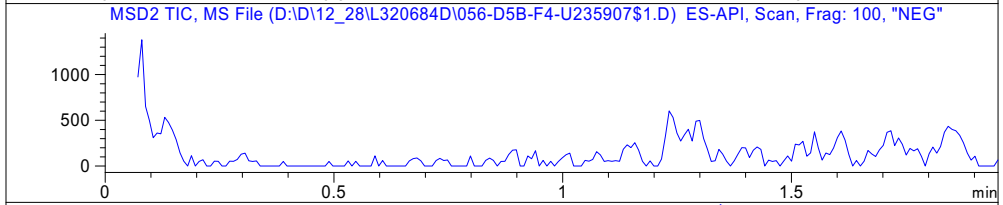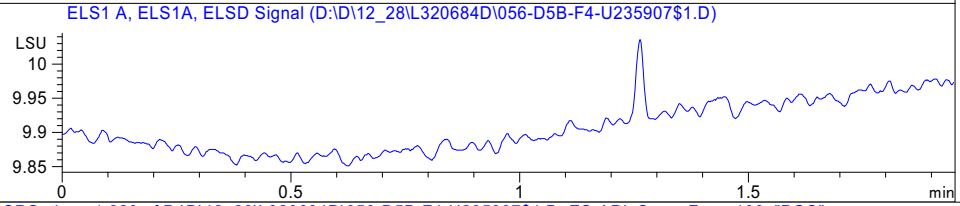

RT 1.233

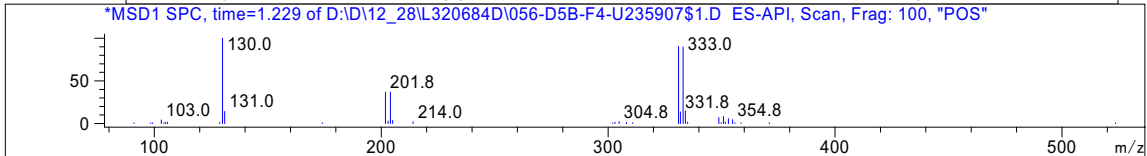

MaxPeak: 100.00%  
Ret\_Time: 1.316 min

U257602\$1

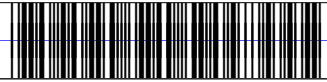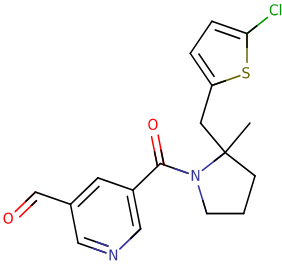

Mol Wt 348.85  
Exact Mass 348.09

| # | Time  | Area%  |
|---|-------|--------|
| 1 | 1.316 | 100.00 |

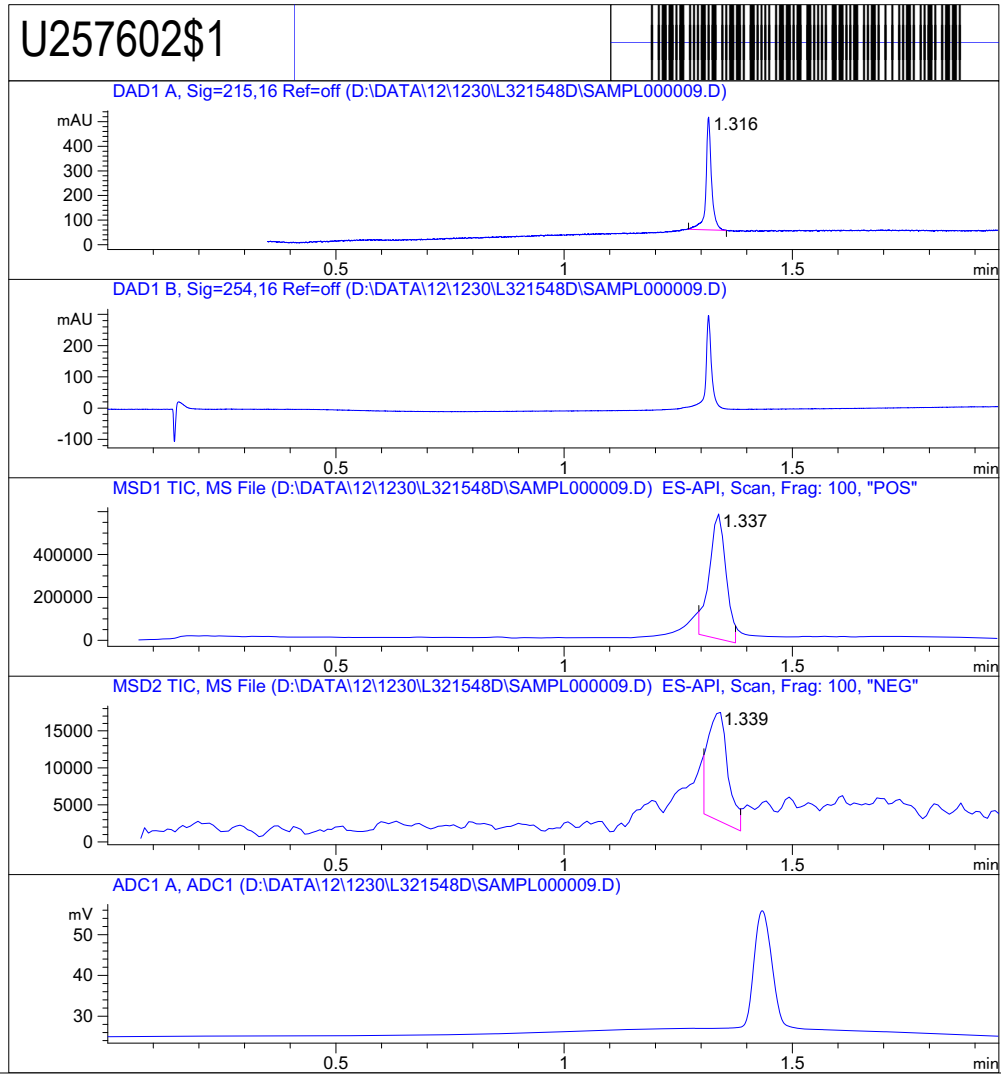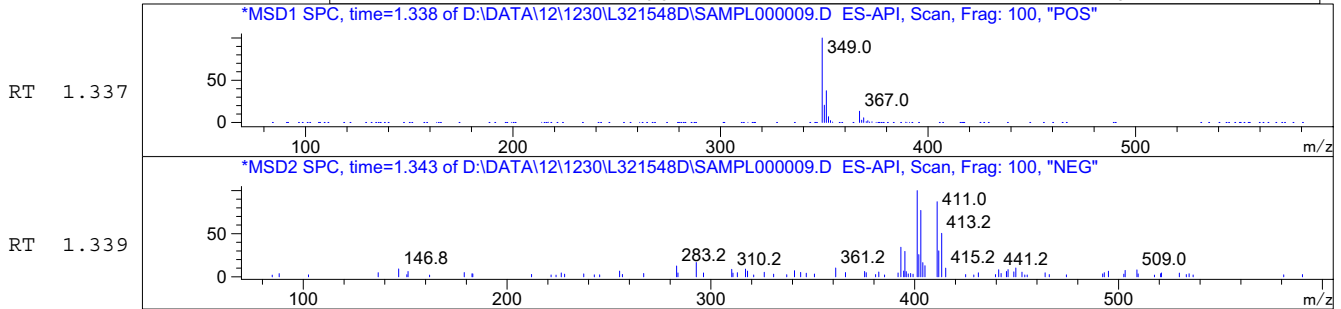

MaxPeak: 100.00%  
Ret\_Time: 1.340 min

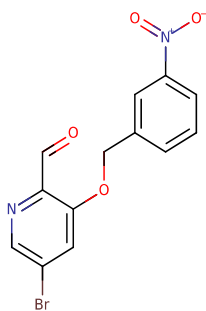

Mol Wt 337.13  
Exact Mass 335.97

| # | Time  | Area%  |
|---|-------|--------|
| 1 | 1.340 | 100.00 |

U920097\$5

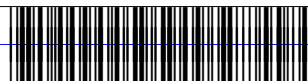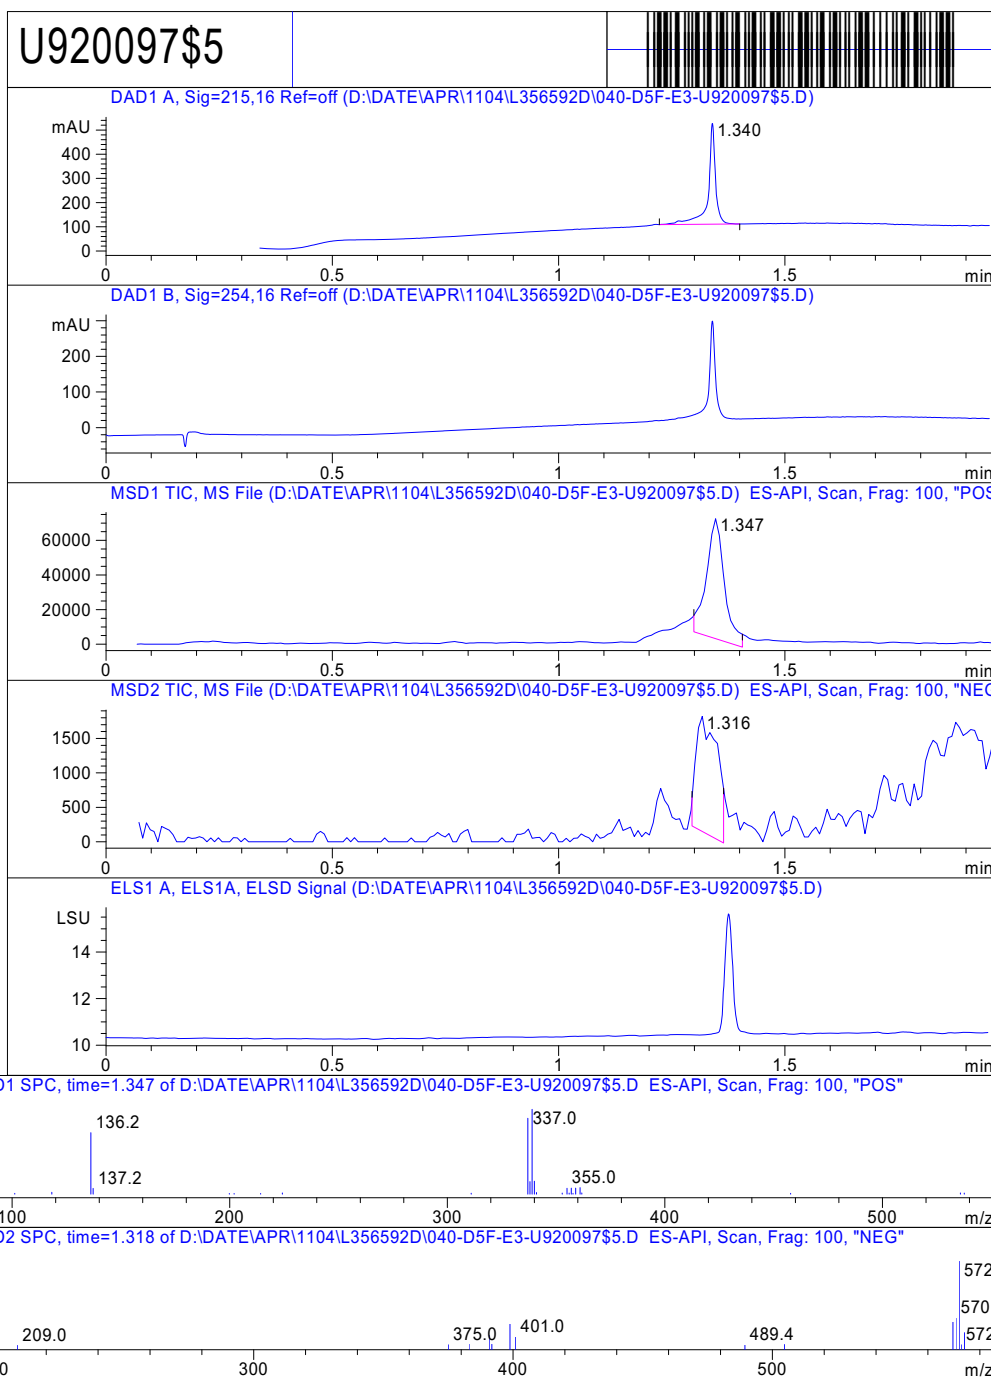

RT 1.347

RT 1.316

MaxPeak: 100.00%  
Ret\_Time: 1.421 min

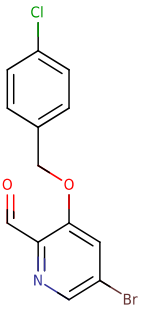

Mol Wt 326.57  
Exact Mass 326.96

| # | Time  | Area%  |
|---|-------|--------|
| 1 | 1.421 | 100.00 |

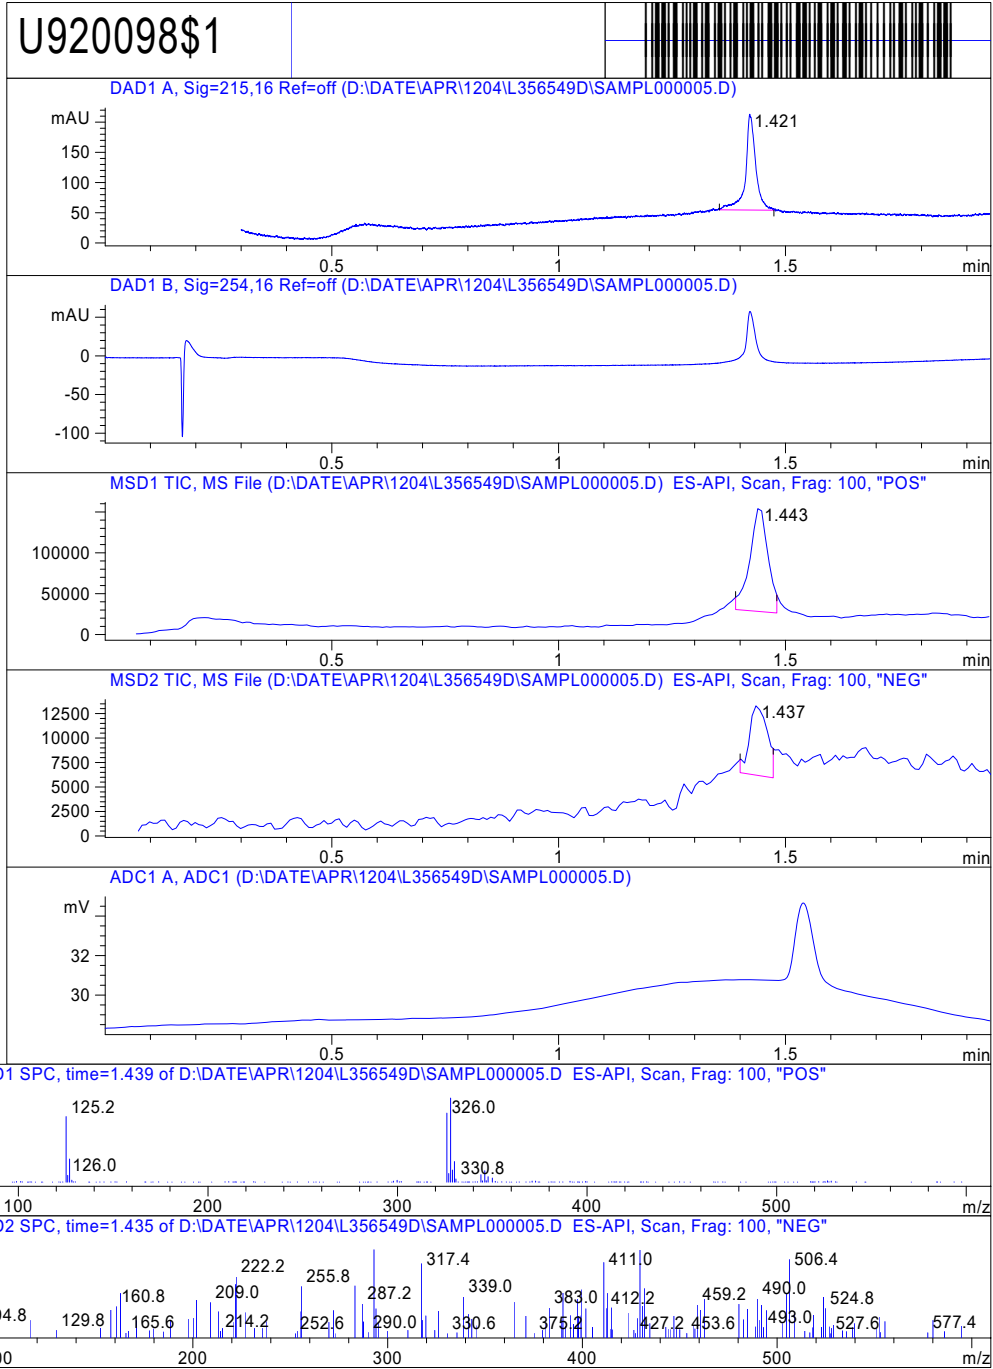

Inj.Date 4/11/2021

Y

- 4 -

Acq. Method C:\CHEM32\ -> ->

Z4954569113\_



MaxPeak: 100.00%  
Ret\_Time: 1.402 min

U920099\$4

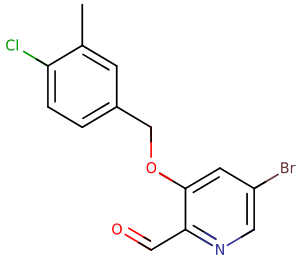

Mol Wt 340.6  
Exact Mass 340.98

| # | Time  | Area%  |
|---|-------|--------|
| 1 | 1.402 | 100.00 |

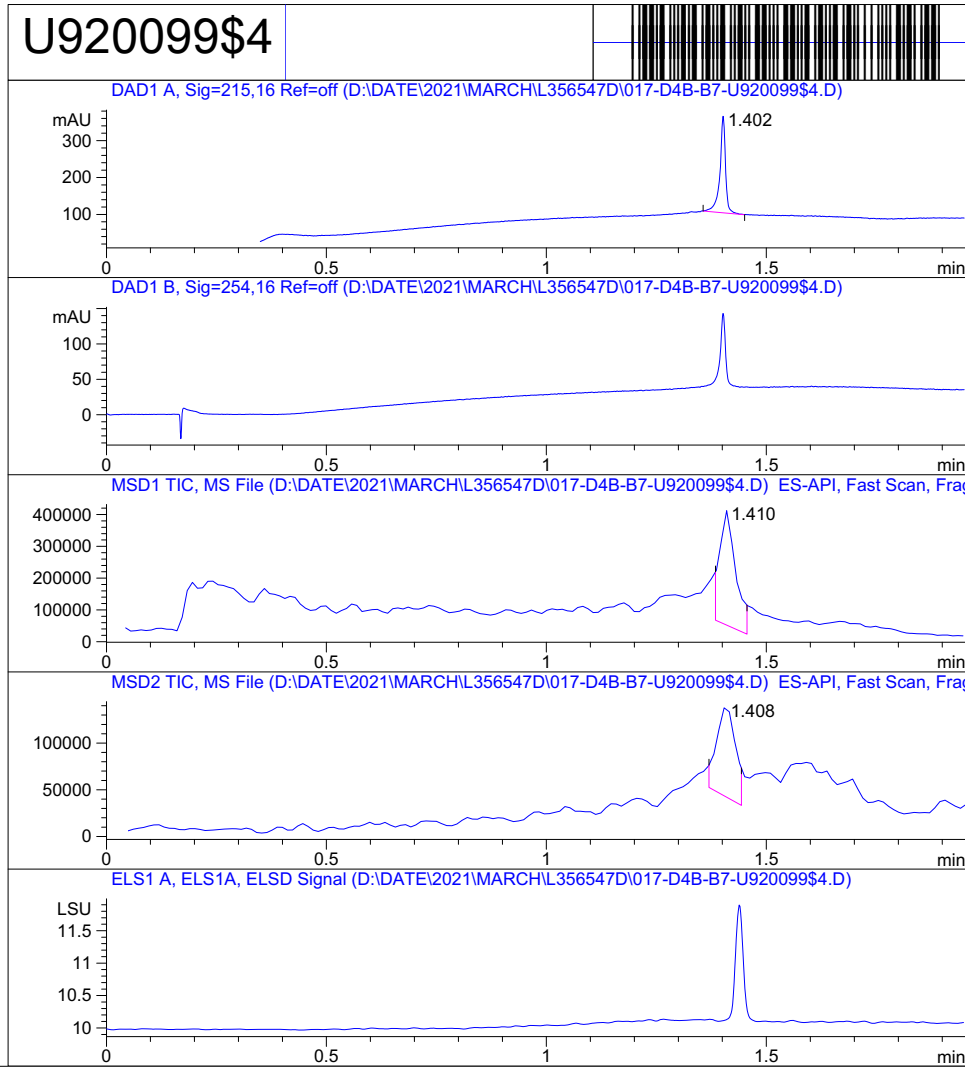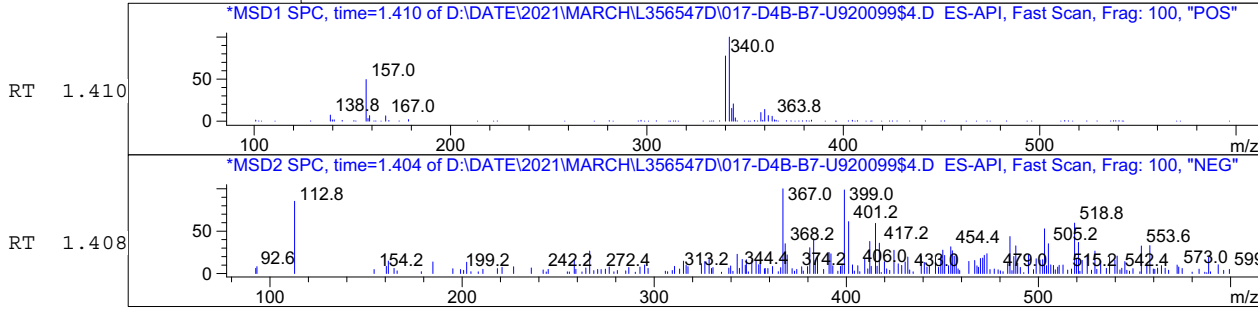

Inj.Date 4/11/2021

T <invalid>

Acq. Method C:\Users\ -> ->

Z4954569120\_

MaxPeak: 100.00%  
Ret\_Time: 1.446 min

# U920102\$3

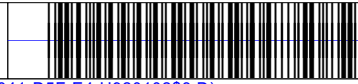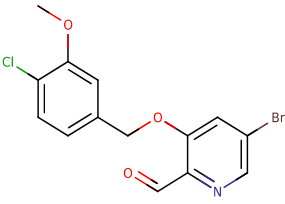

**Mol Wt** 356.6  
**Exact Mass** 356.97

| # | Time  | Area%  |
|---|-------|--------|
| 1 | 1.446 | 100.00 |

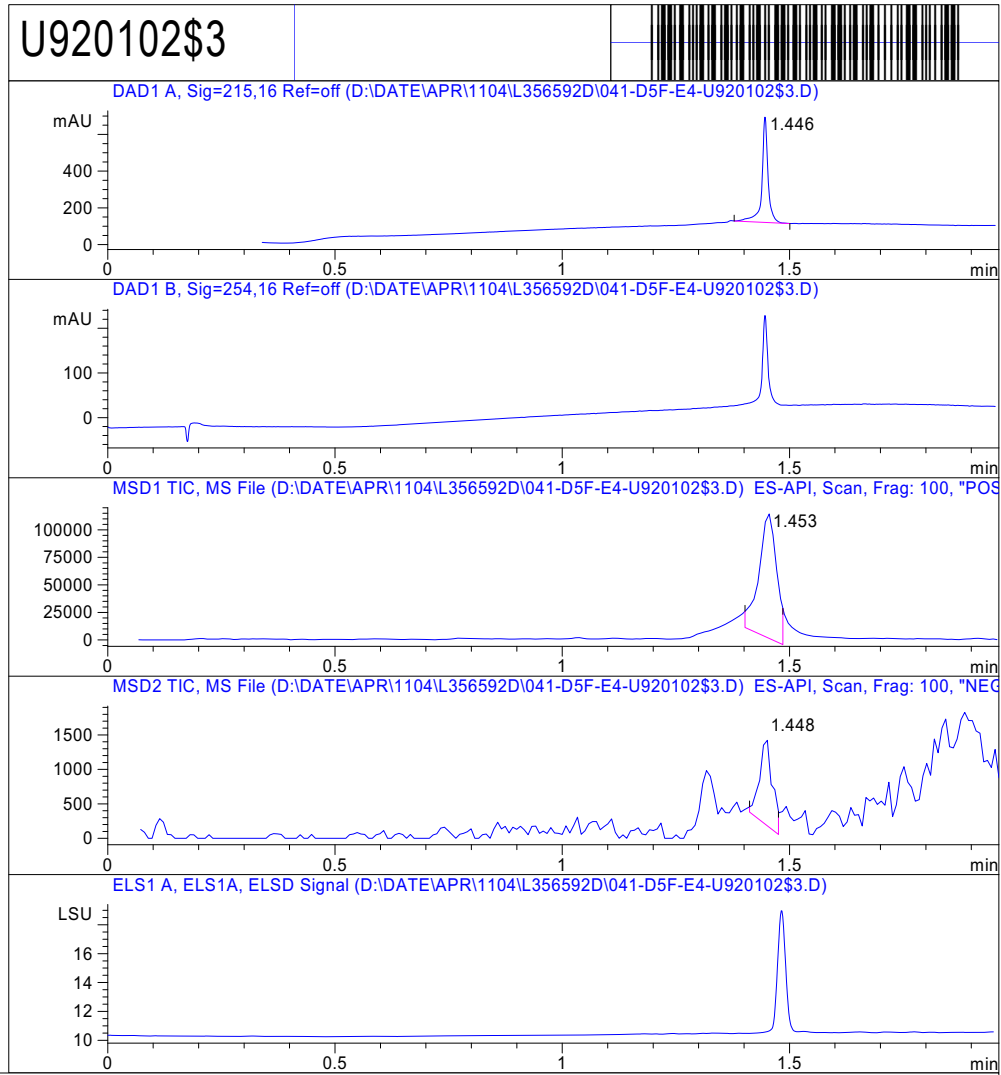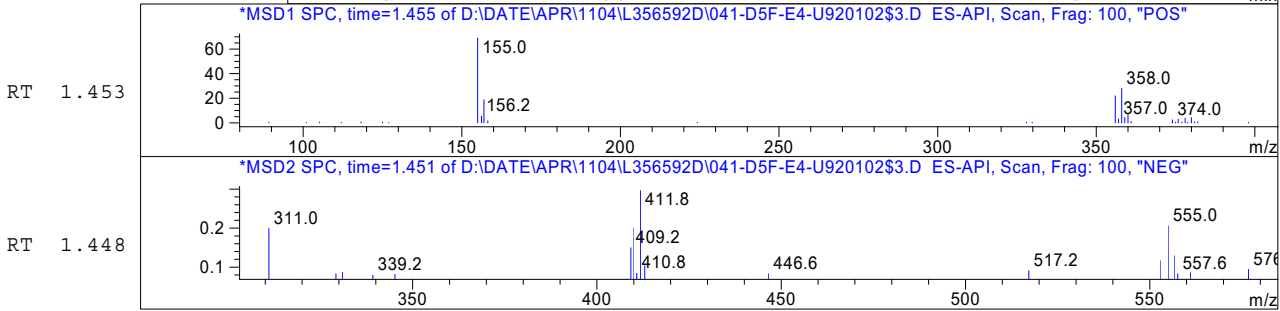

MaxPeak: 100.00%  
Ret\_Time: 1.336 min

U920111\$1

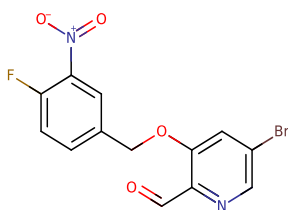

Mol Wt 355.12  
Exact Mass 353.96

| # | Time  | Area%  |
|---|-------|--------|
| 1 | 1.336 | 100.00 |

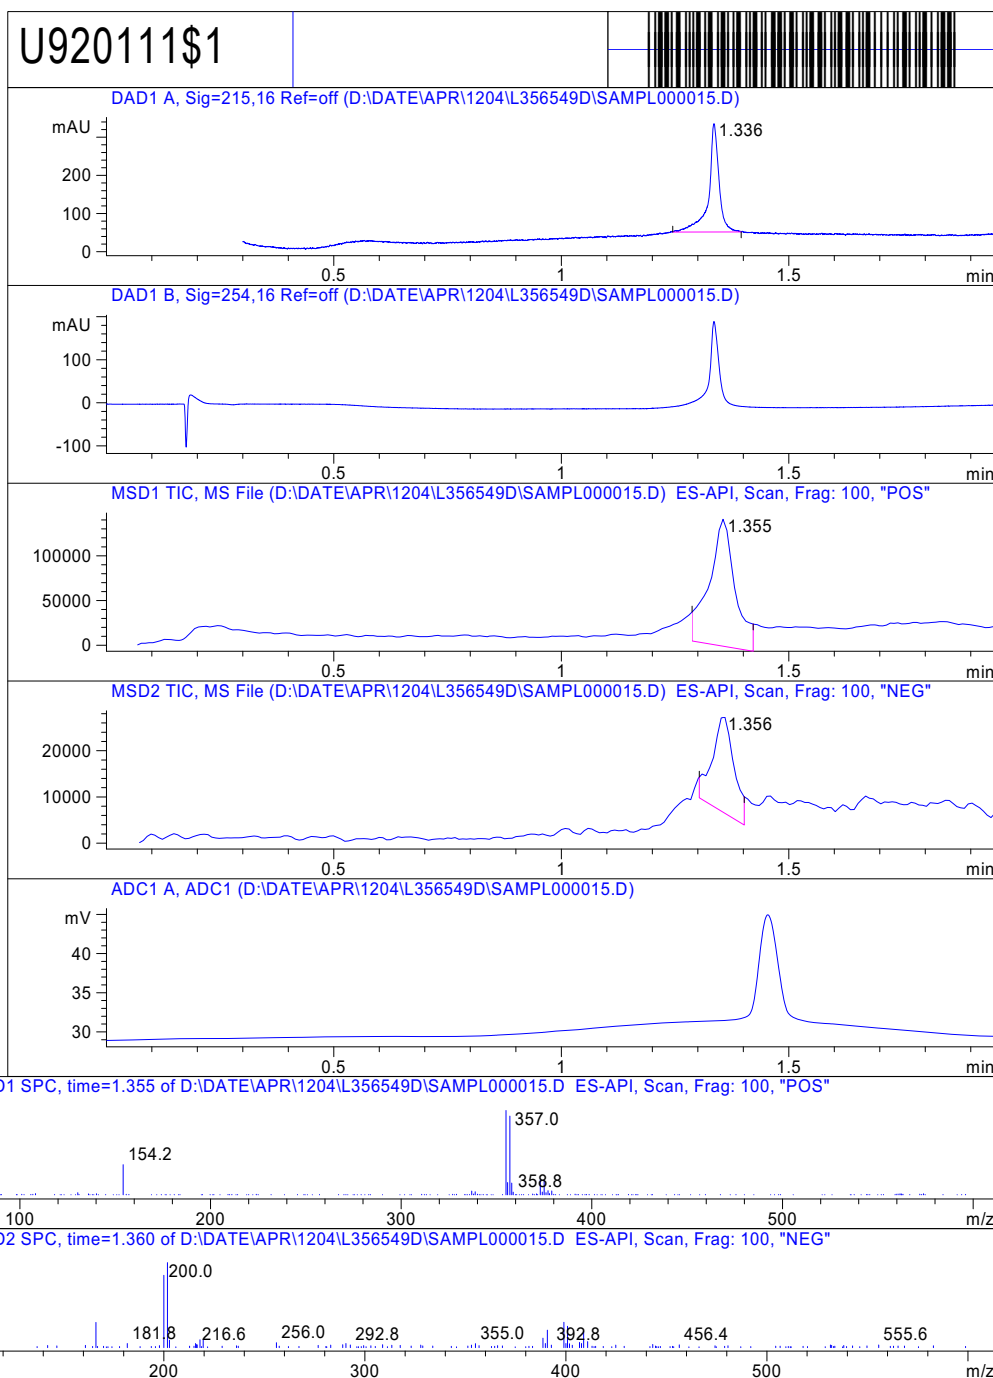

RT 1.355

RT 1.356

MaxPeak: 100.00%  
Ret\_Time: 1.528 min

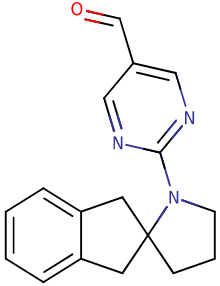

Mol Wt 279.34  
Exact Mass 279.16

| # | Time  | Area%  |
|---|-------|--------|
| 1 | 1.528 | 100.00 |

S993138\$1

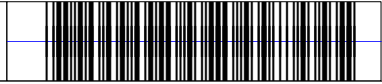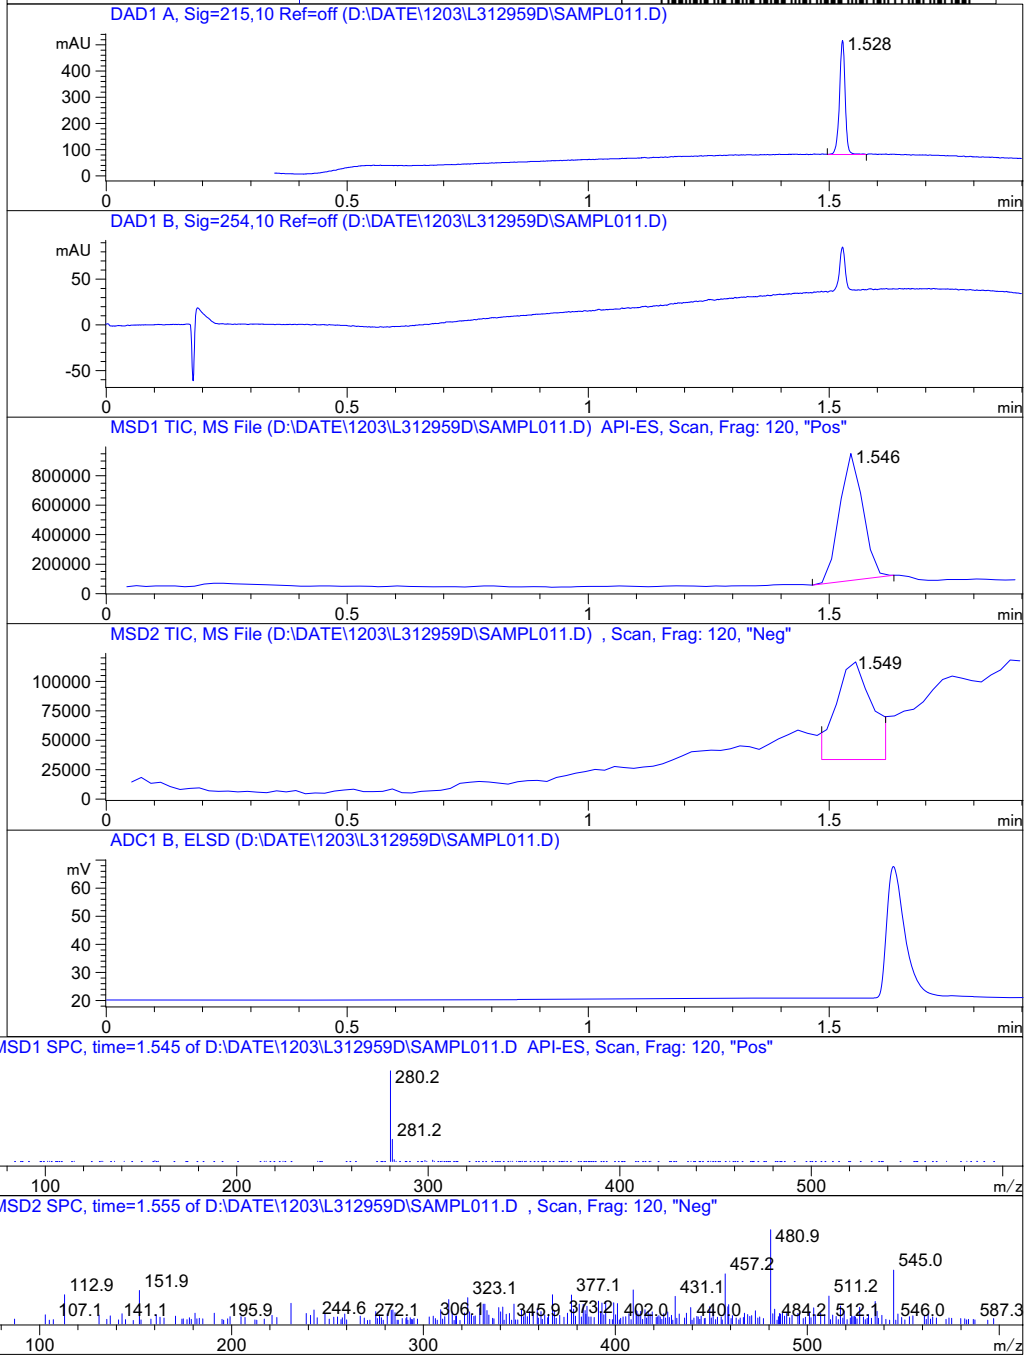

RT 1.546

RT 1.549

Inj.Date 12/3/2020

O

-SL-

Acq. Method C:\HPCHEM\ -> ->

Z2851996828\_

MaxPeak: 100.00%  
Ret\_Time: 1.648 min

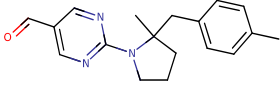

Mol Wt 295.38  
Exact Mass 295.2

| # | Time  | Area%  |
|---|-------|--------|
| 1 | 1.648 | 100.00 |

U339489\$1

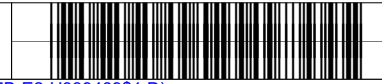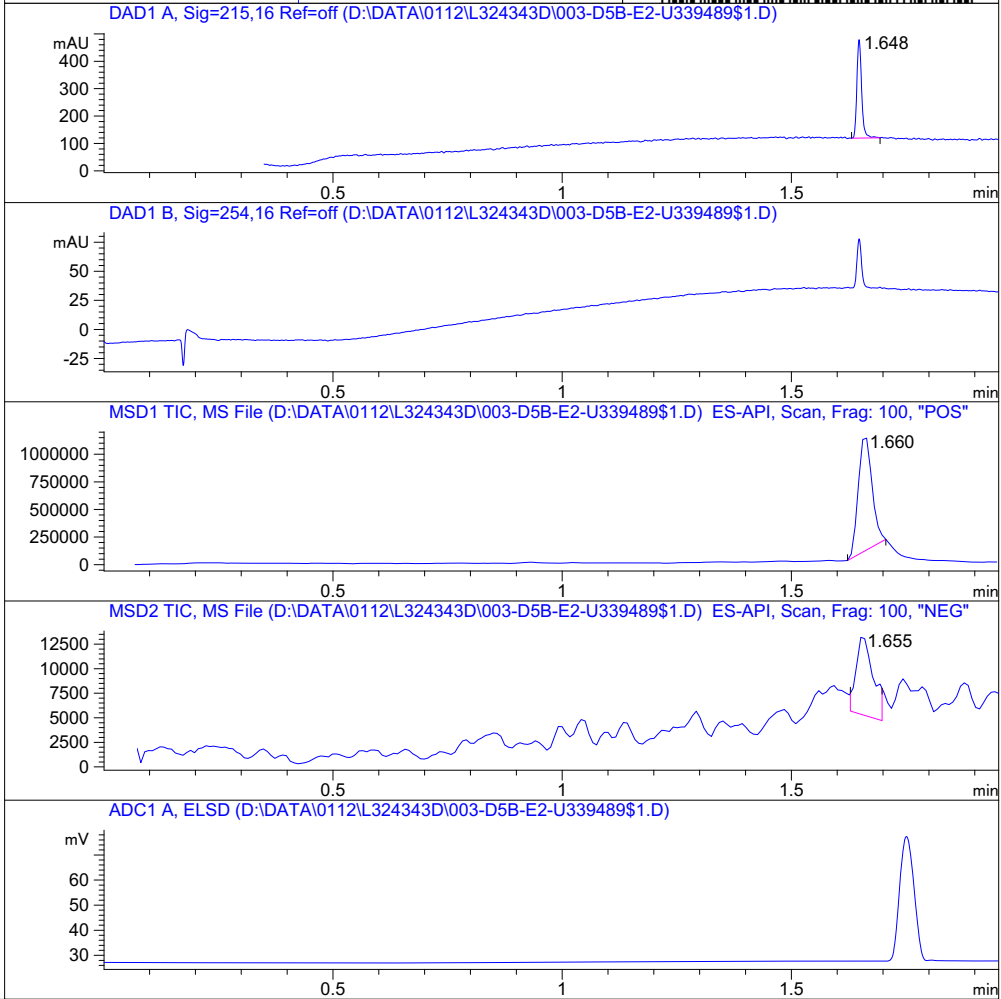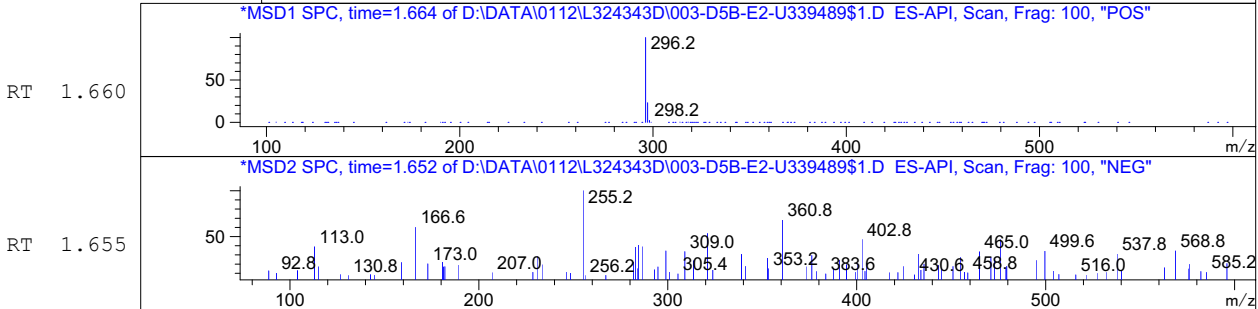

W179754\$4

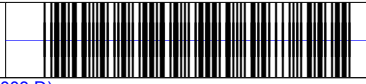

MaxPeak: 100.00%  
Ret\_Time: 1.508 min

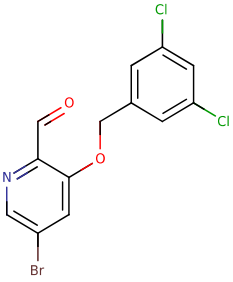

Mol Wt 361.02  
Exact Mass 360.92

| # | Time  | Area%  |
|---|-------|--------|
| 1 | 1.508 | 100.00 |

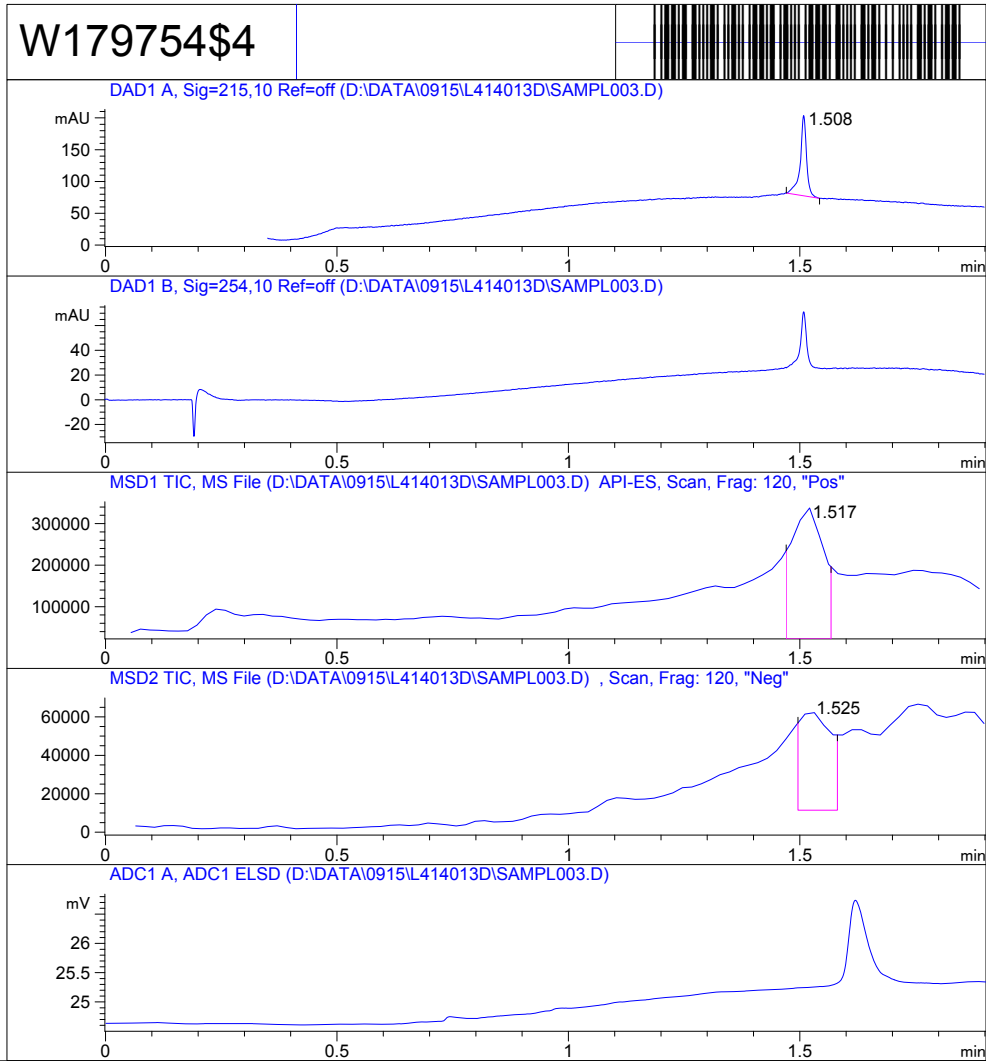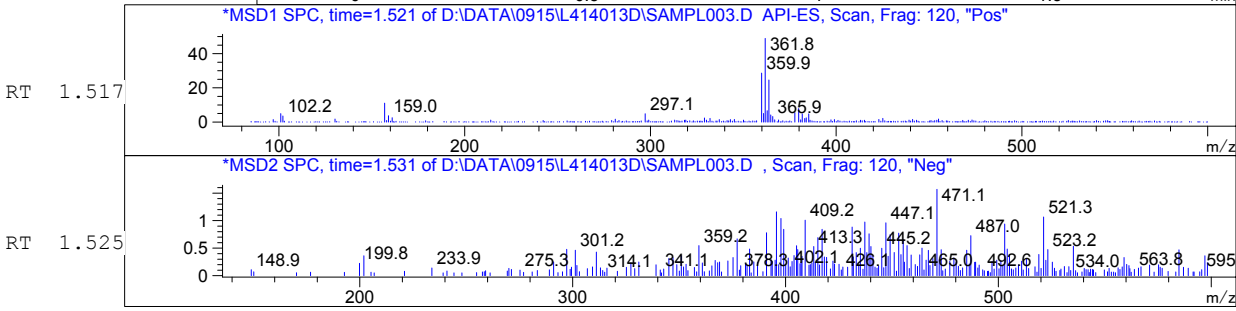

Inj.Date 9/16/2021

OA

-VL-

Acq. Method C:\HPCHEM\ -> ->

Z5192779033\_

MaxPeak: 100.00%  
Ret\_Time: 1.159 min

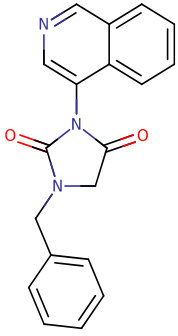

Mol Wt 317.34  
Exact Mass 317.13

| # | Time  | Area%  |
|---|-------|--------|
| 1 | 1.159 | 100.00 |

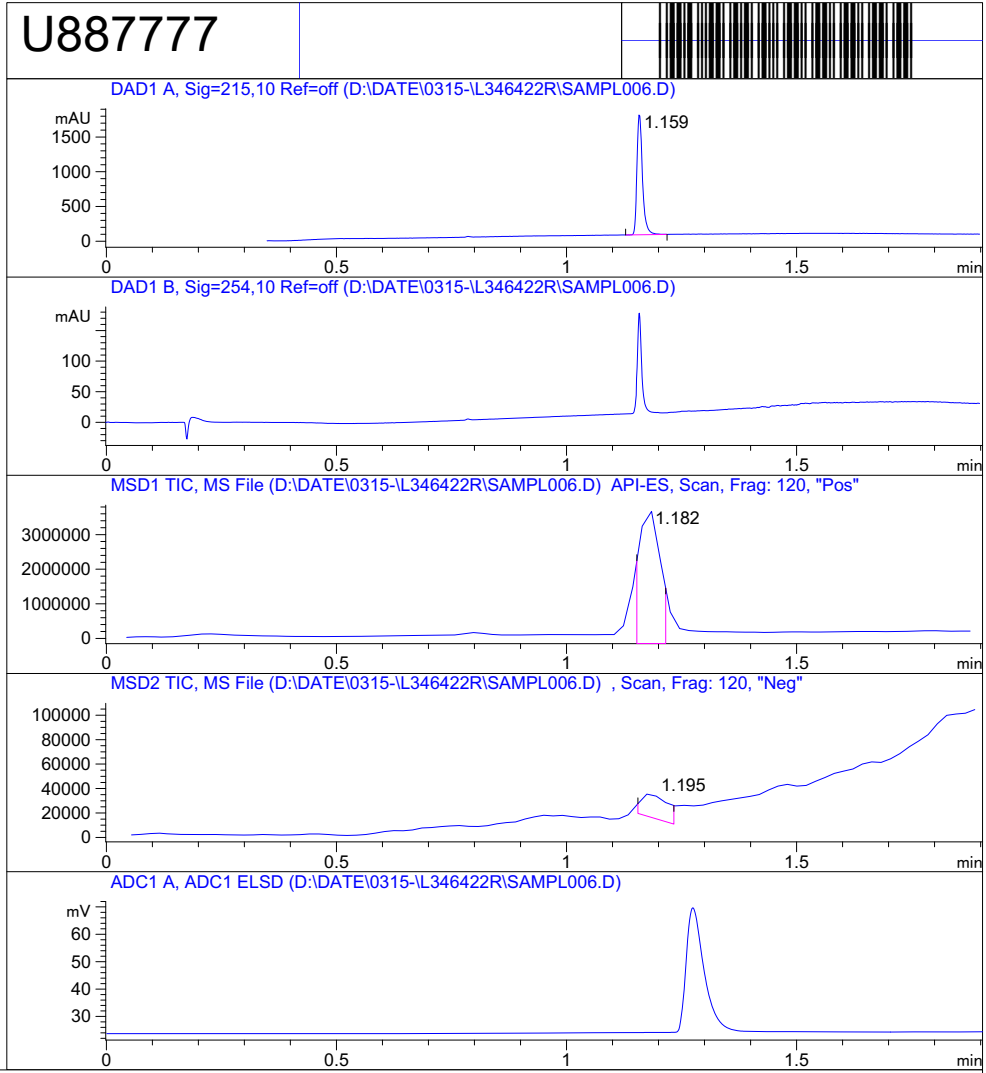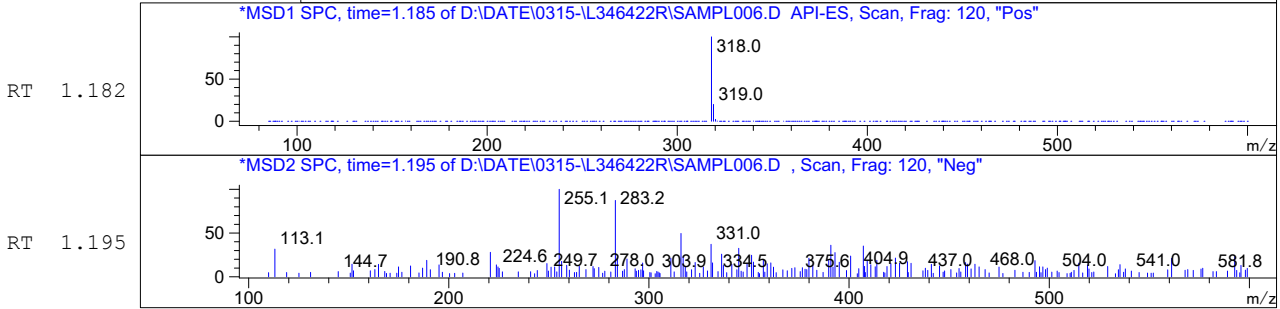

MaxPeak: 96.82%  
Ret\_Time: 1.258 min

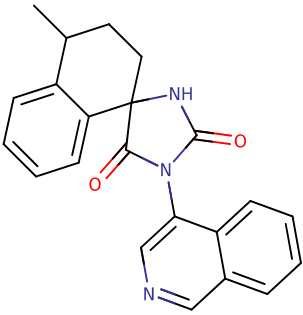

Mol Wt 357.4  
Exact Mass 357.17

| # | Time  | Area% |
|---|-------|-------|
| 1 | 0.555 | 0.19  |
| 2 | 0.688 | 1.05  |
| 3 | 0.851 | 1.12  |
| 4 | 0.998 | 0.81  |
| 5 | 1.258 | 96.82 |

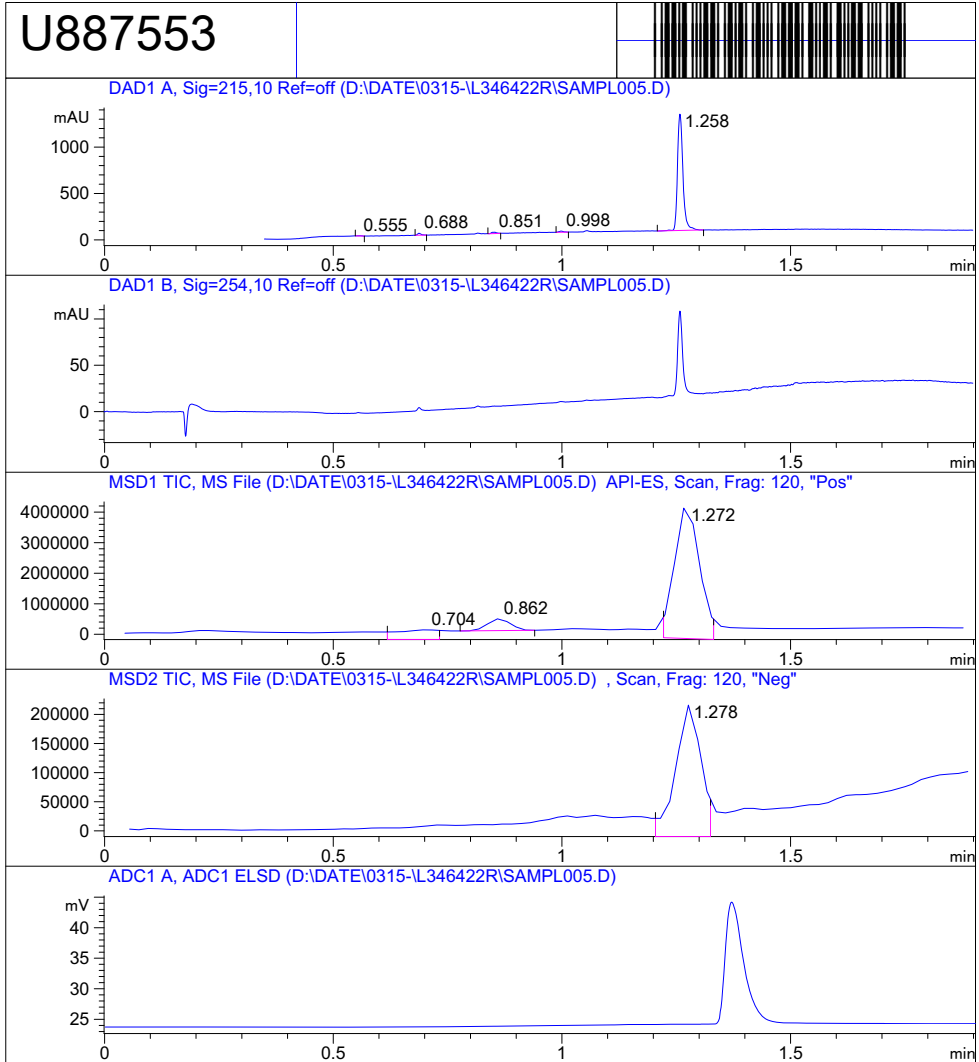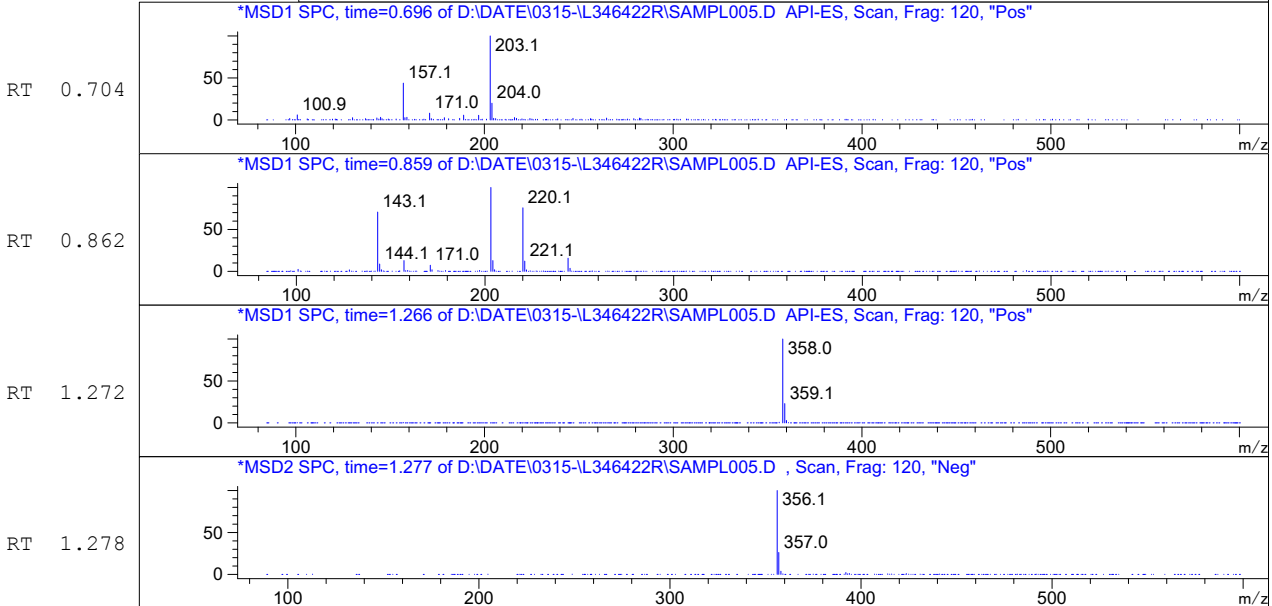

Inj.Date 3/16/2021

E

-VL-

Acq. Method C:\HPCHEM\> >

Z4929616137\_





MaxPeak: 100.00%  
Ret\_Time: 0.940 min

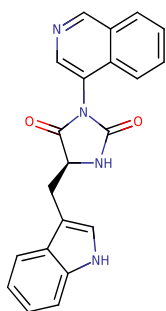

Mol Wt 356.38  
Exact Mass 356.14

| # | Time  | Area%  |
|---|-------|--------|
| 1 | 0.940 | 100.00 |

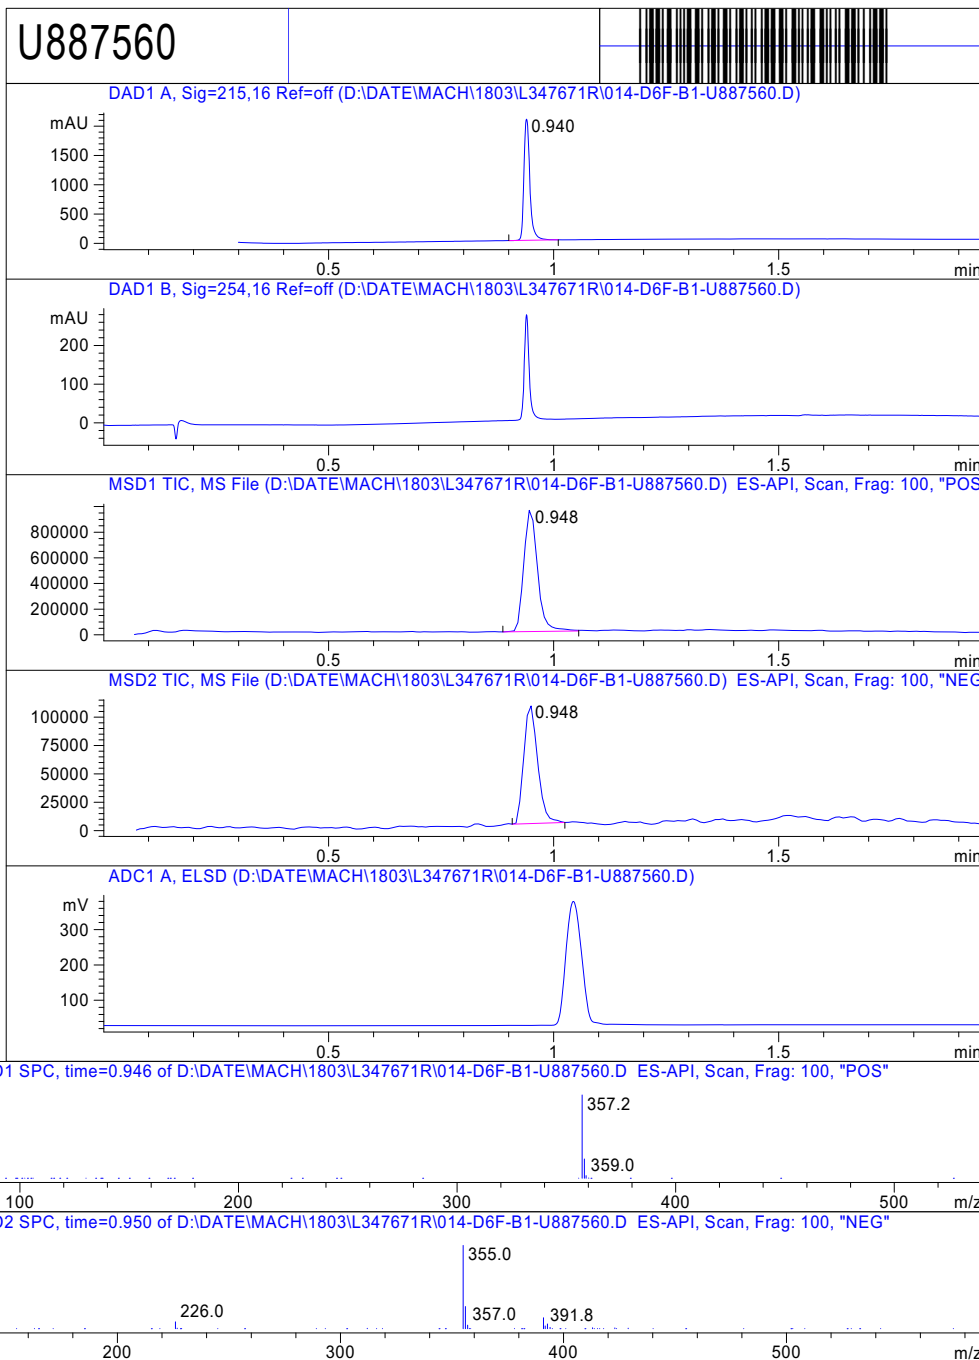

MaxPeak: 100.00%  
Ret\_Time: 1.050 min

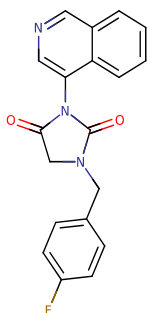

Mol Wt 335.33  
Exact Mass 335.12

| # | Time  | Area%  |
|---|-------|--------|
| 1 | 1.050 | 100.00 |

U888029

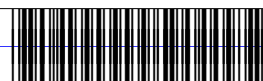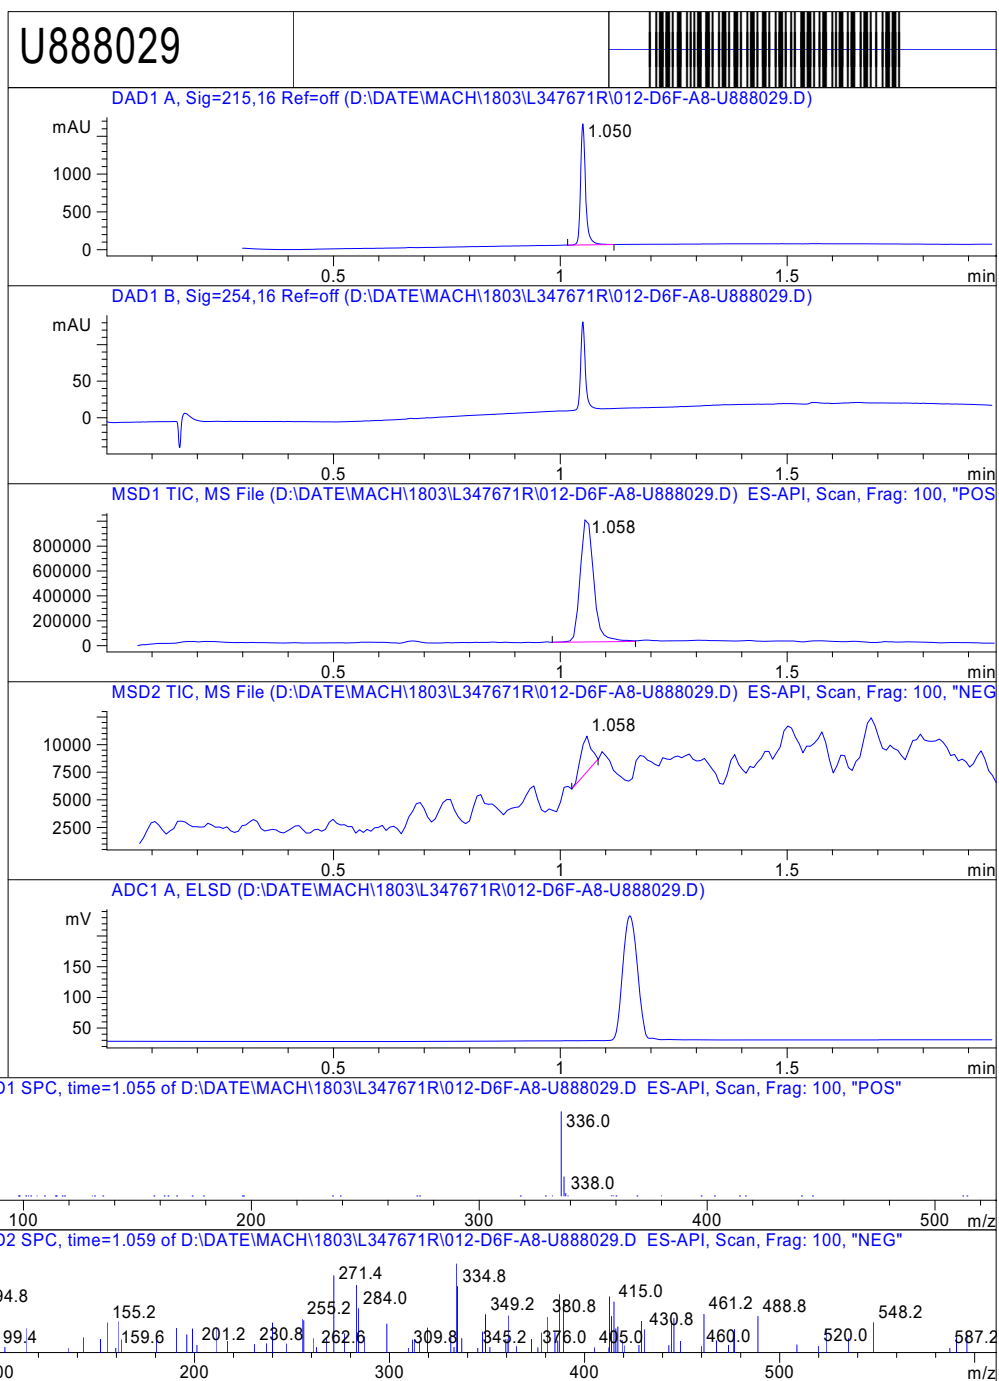

MaxPeak: 100.00%  
Ret\_Time: 1.005 min

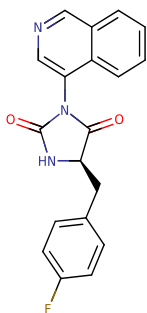

Mol Wt 335.33  
Exact Mass 335.12

| # | Time  | Area%  |
|---|-------|--------|
| 1 | 1.005 | 100.00 |

# U887628

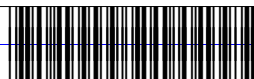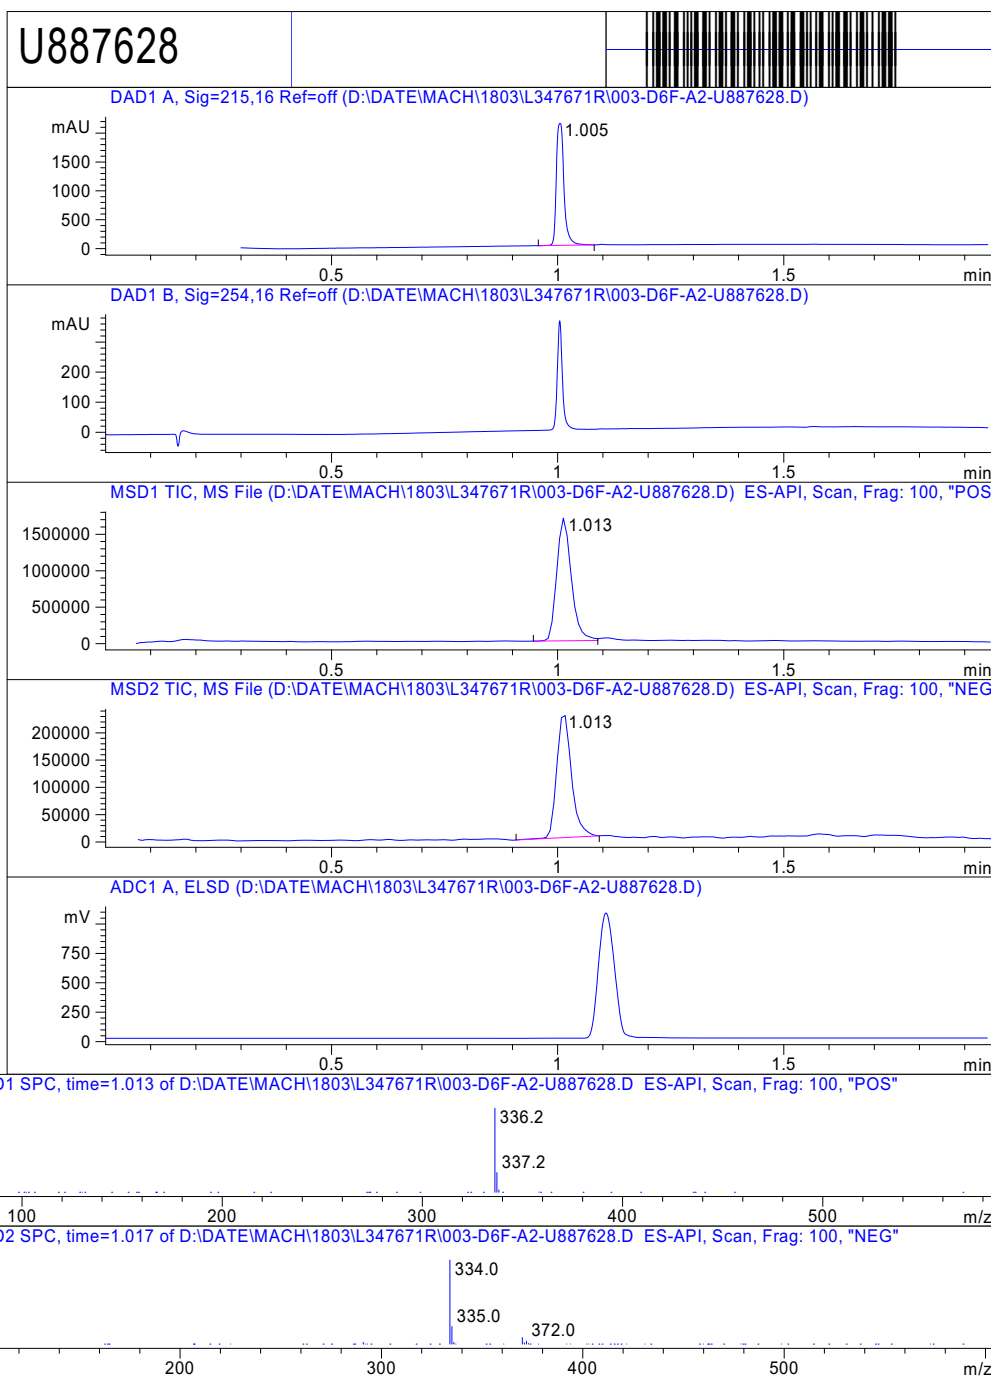

MaxPeak: 100.00%  
Ret\_Time: 1.004 min

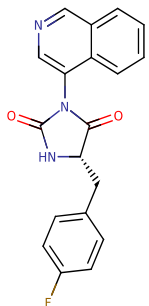

Mol Wt 335.33  
Exact Mass 335.12

| # | Time  | Area%  |
|---|-------|--------|
| 1 | 1.004 | 100.00 |

# U887617

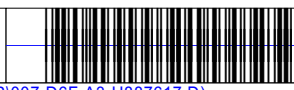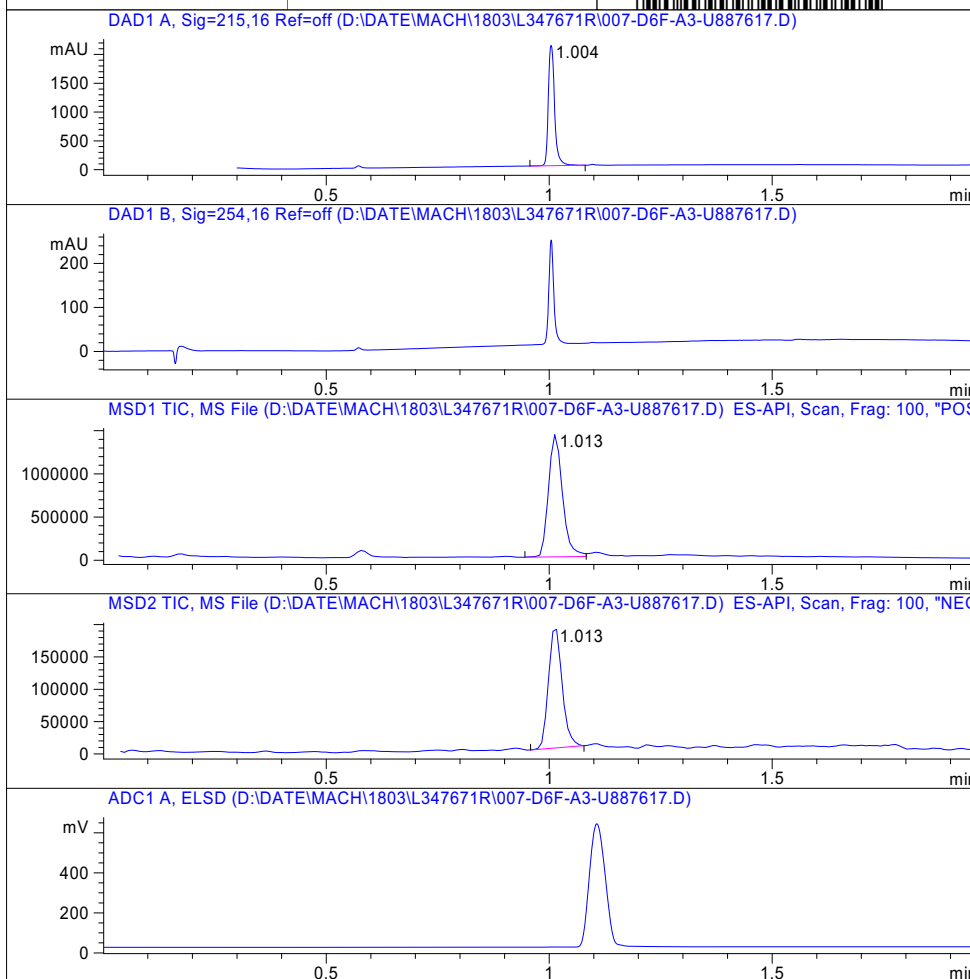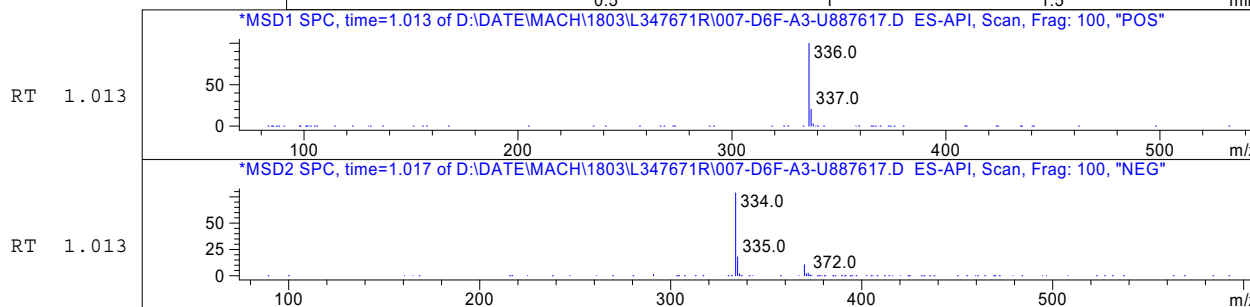

MaxPeak: 57.60%  
Ret\_Time: 1.022 min

# U887779

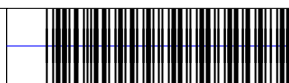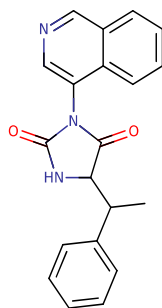

**Mol Wt** 331.37  
**Exact Mass** 331.15

| # | Time  | Area% |
|---|-------|-------|
| 1 | 1.022 | 57.60 |
| 2 | 1.044 | 42.40 |

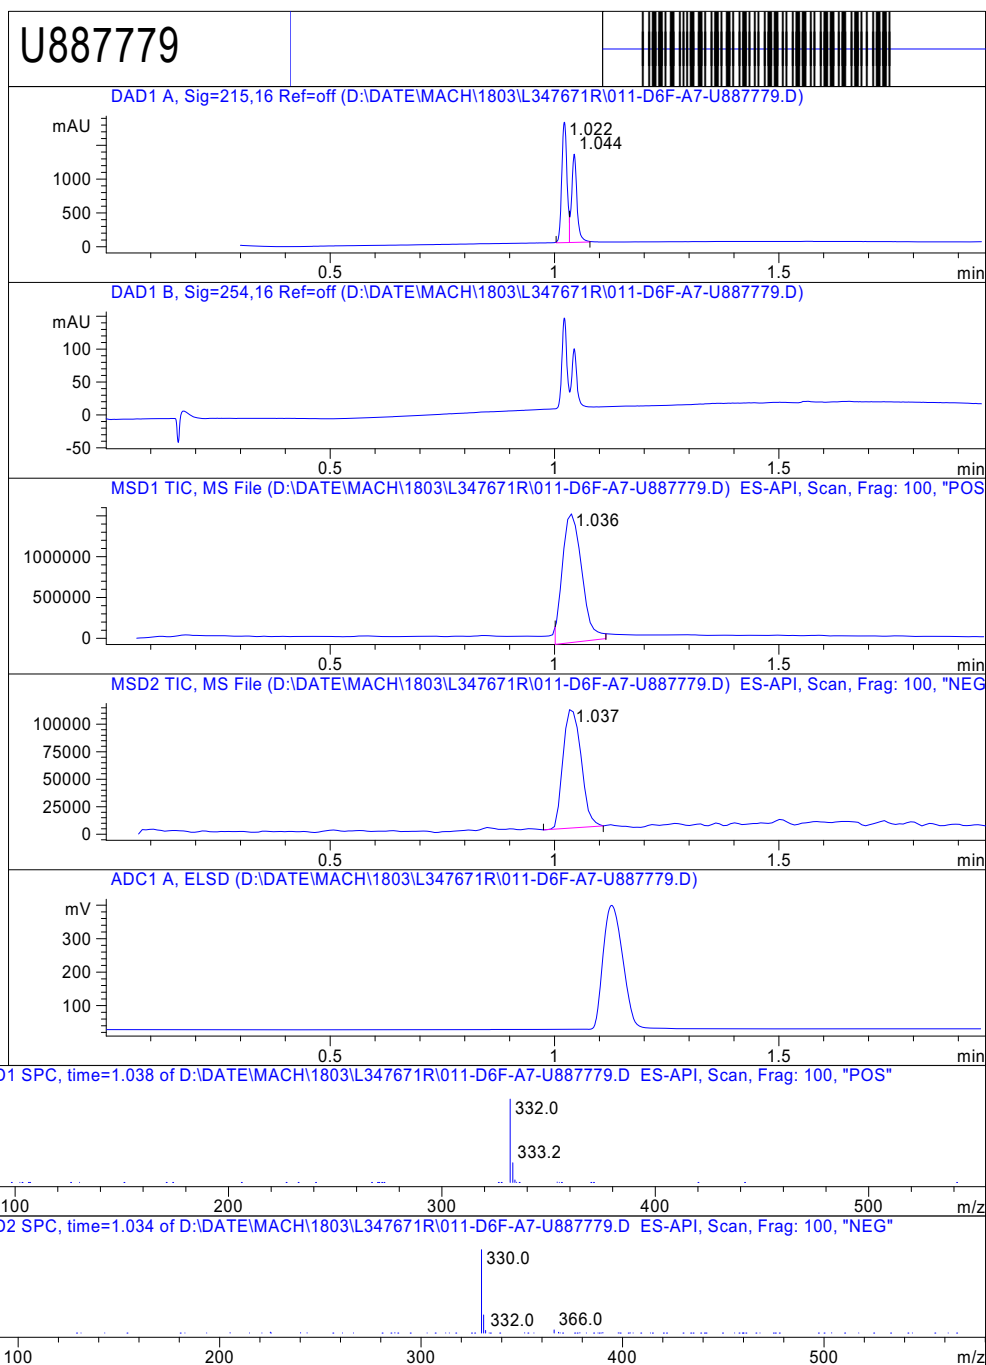

MaxPeak: 100.00%  
Ret\_Time: 1.093 min

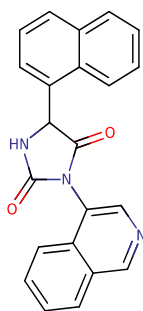

Mol Wt 353.37  
Exact Mass 353.13

| # | Time  | Area%  |
|---|-------|--------|
| 1 | 1.093 | 100.00 |

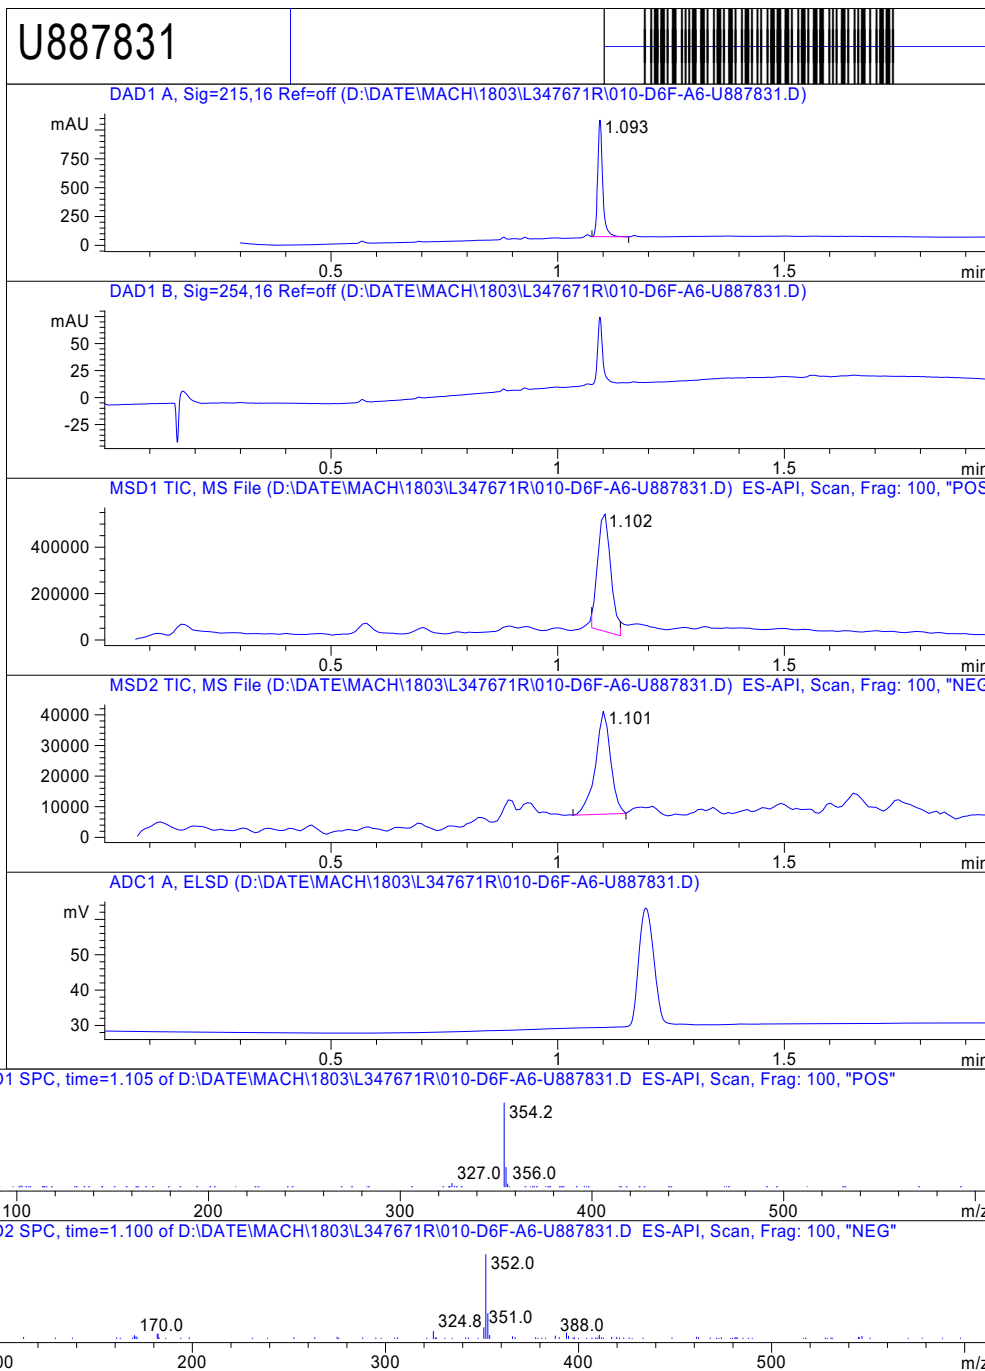

MaxPeak: 100.00%  
Ret\_Time: 1.073 min

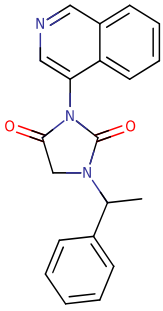

Mol Wt 331.37  
Exact Mass 331.15

| # | Time  | Area%  |
|---|-------|--------|
| 1 | 1.073 | 100.00 |

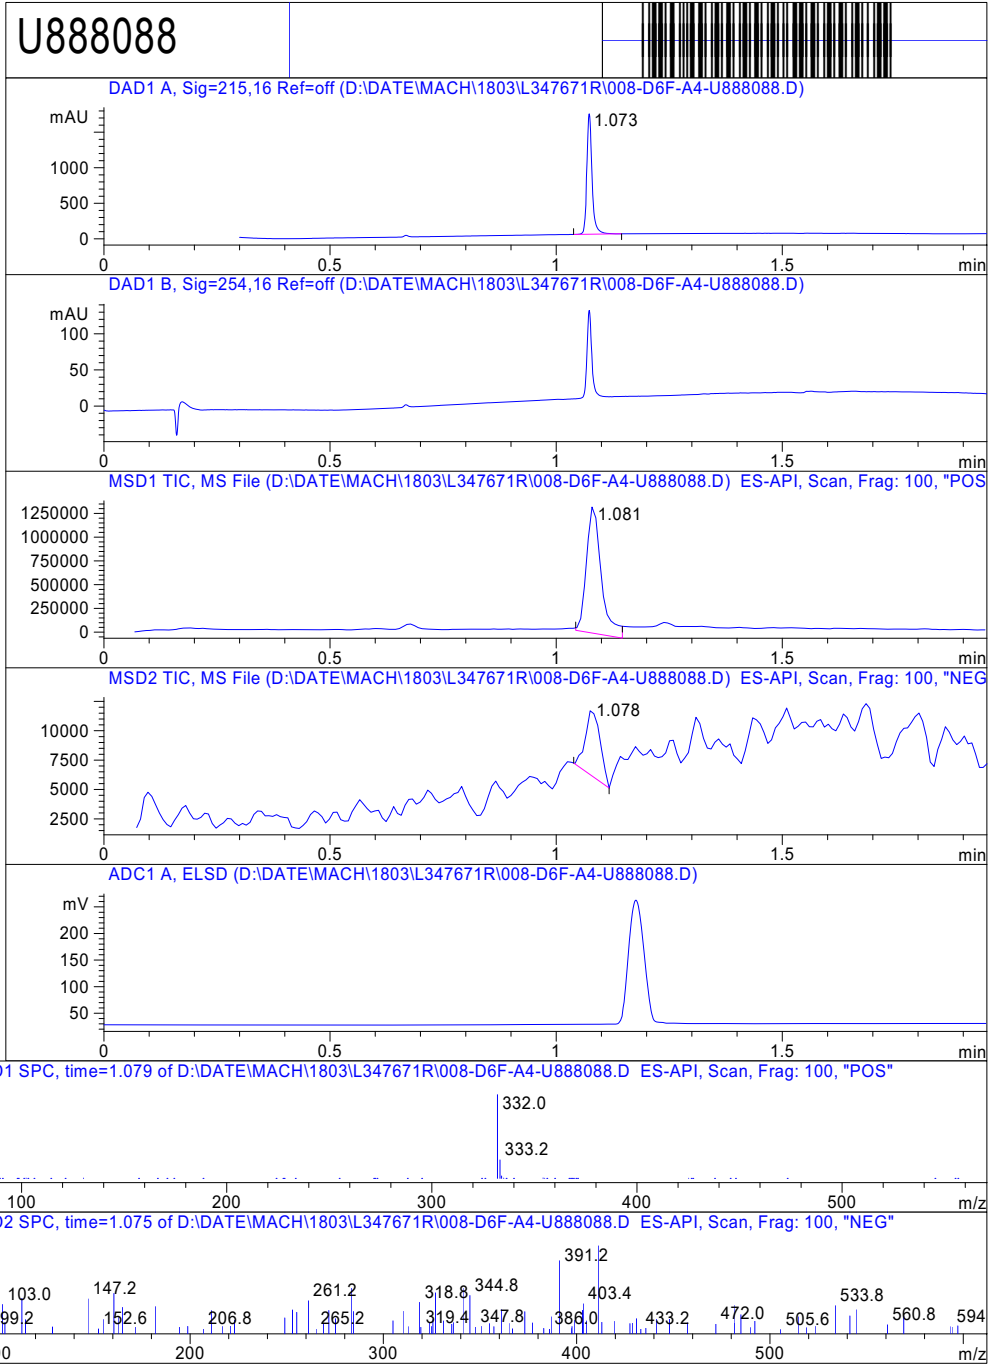



MaxPeak: 100.00%  
Ret\_Time: 1.177 min

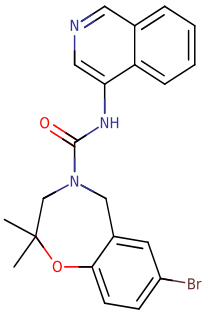

Mol Wt 426.31  
Exact Mass 427.1

| # | Time  | Area%  |
|---|-------|--------|
| 1 | 1.177 | 100.00 |

V013590\$2

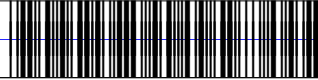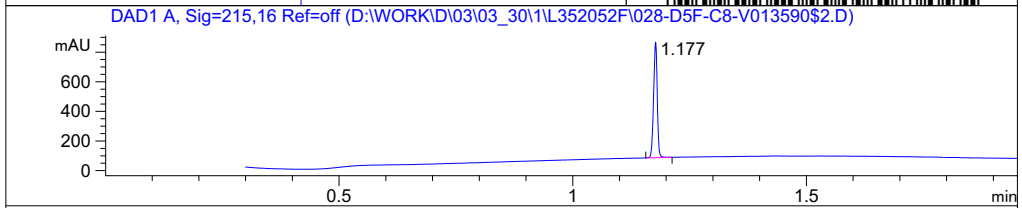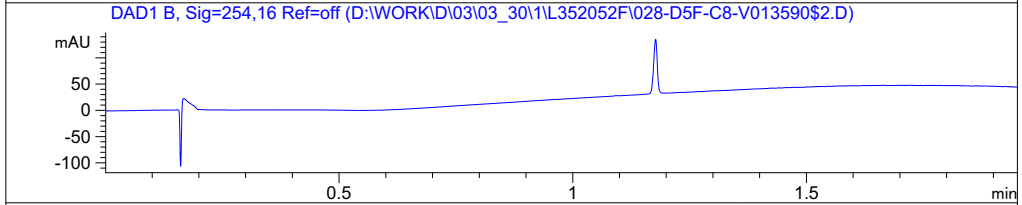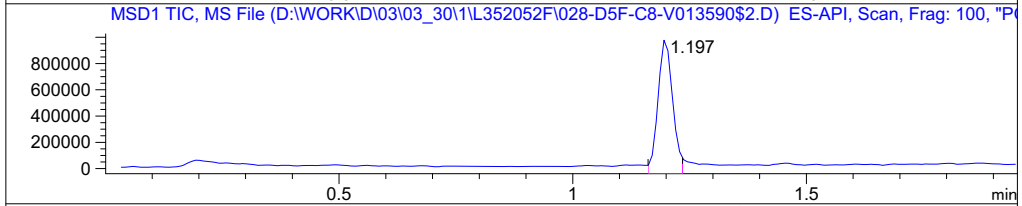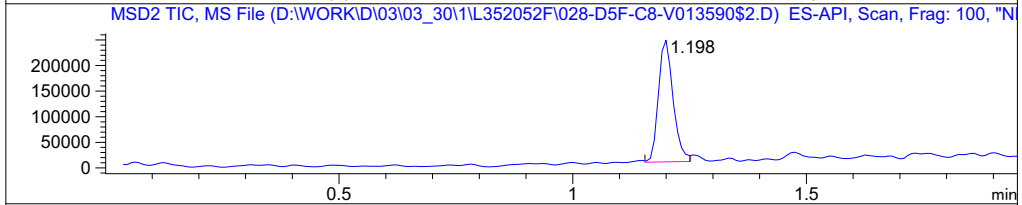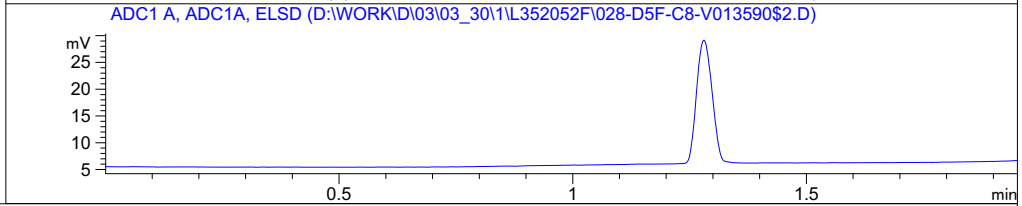

RT 1.197

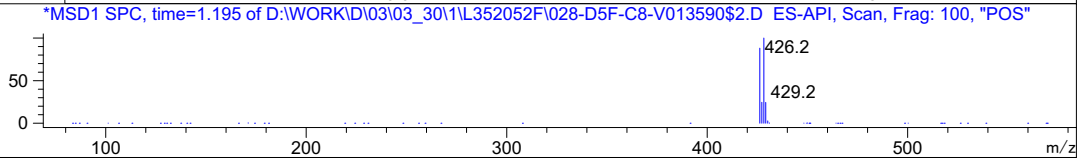

RT 1.198

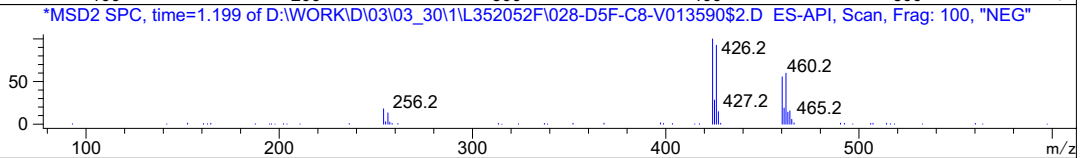

MaxPeak: 100.00%  
Ret\_Time: 0.828 min

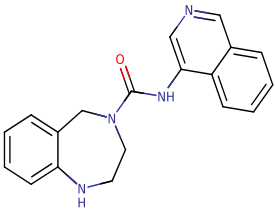

Mol Wt 318.37  
Exact Mass 318.17

| # | Time  | Area%  |
|---|-------|--------|
| 1 | 0.828 | 100.00 |

V013589\$1

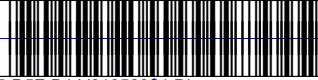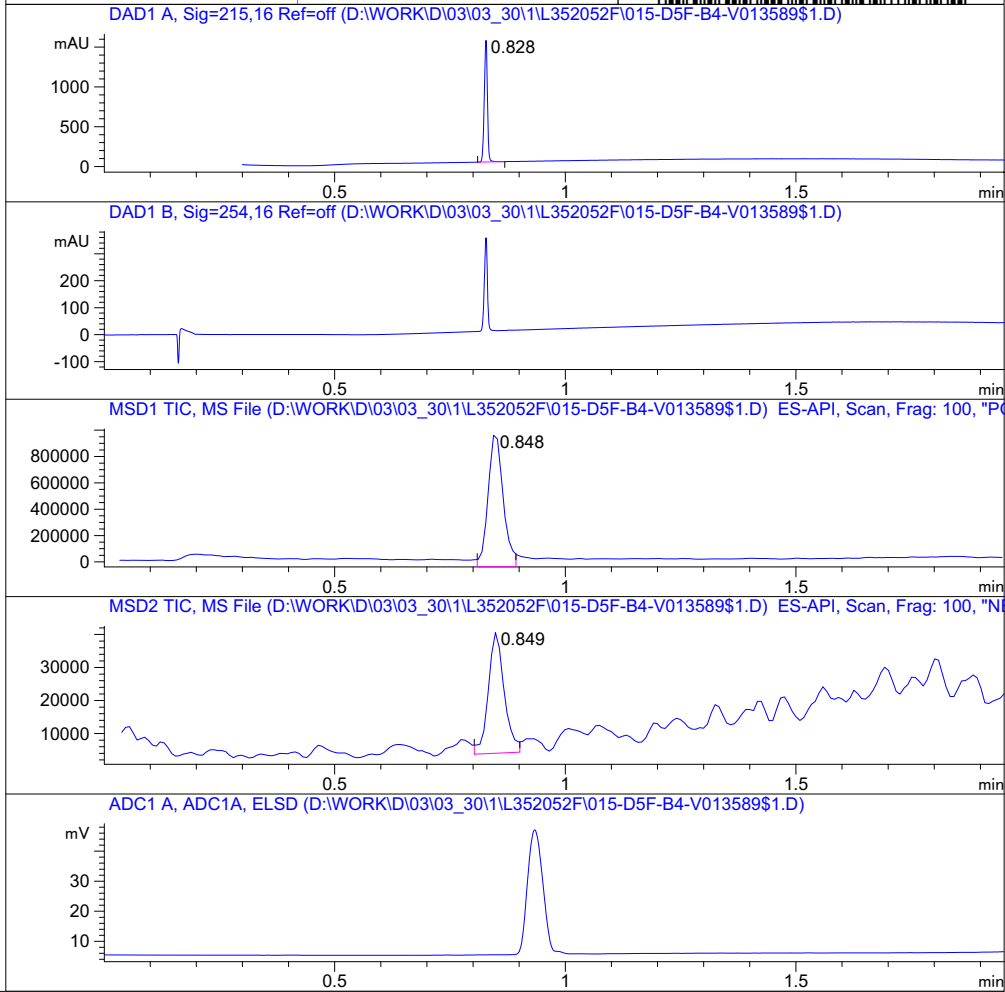

RT 0.848

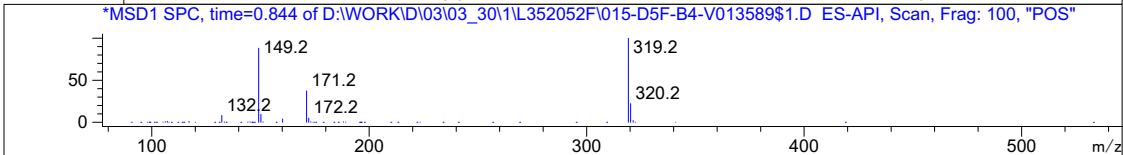

RT 0.849

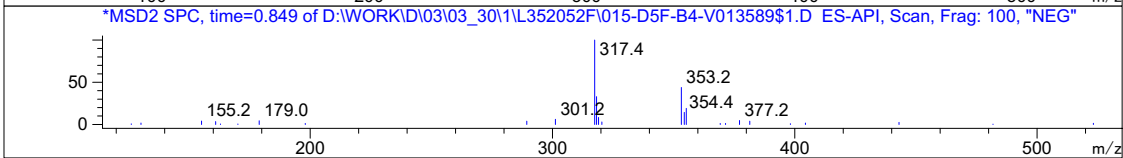

V048775\$2

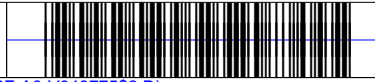

MaxPeak: 100.00%  
Ret\_Time: 2.443 min

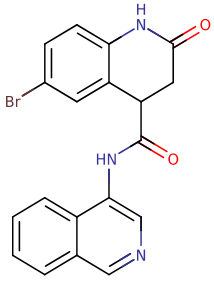

Mol Wt 396.24  
Exact Mass 395.04

| # | Time  | Area%  |
|---|-------|--------|
| 1 | 2.443 | 100.00 |

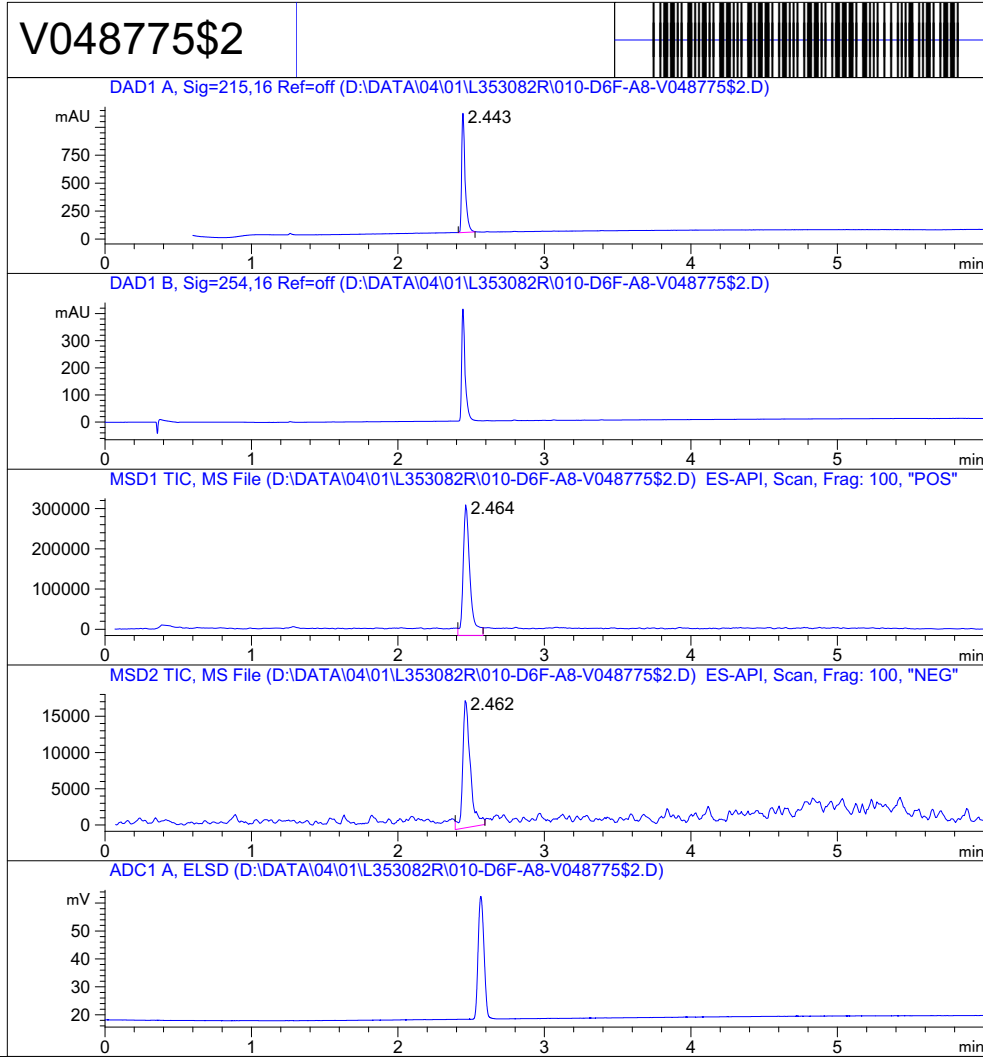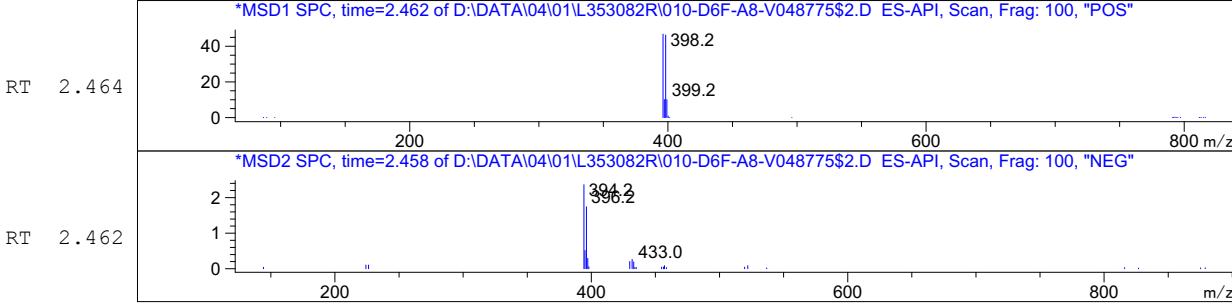

MaxPeak: 98.67%  
Ret\_Time: 2.380 min

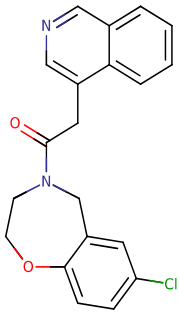

Mol Wt 352.81  
Exact Mass 352.12

| # | Time  | Area% |
|---|-------|-------|
| 1 | 2.380 | 98.67 |
| 2 | 3.345 | 1.33  |

V053006\$1

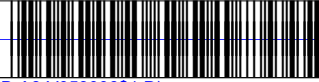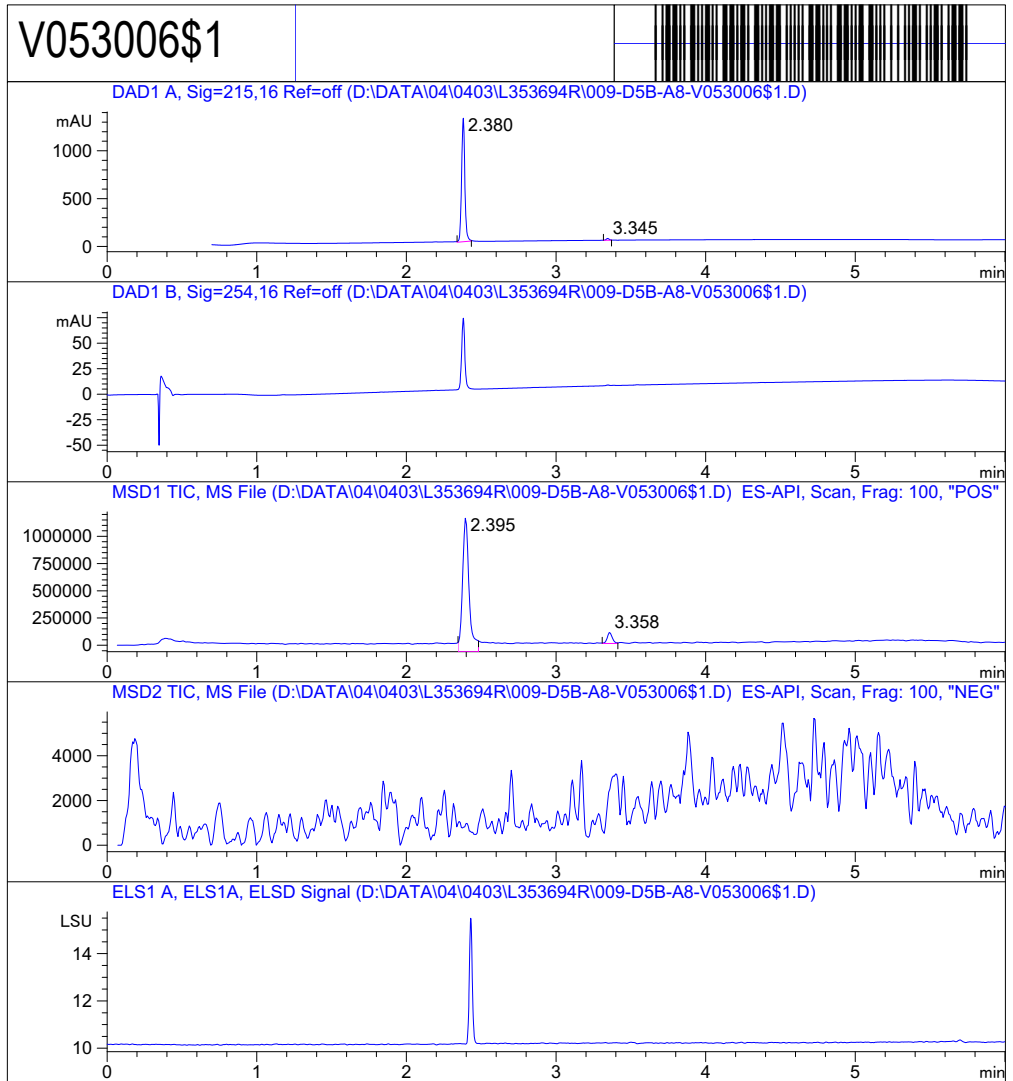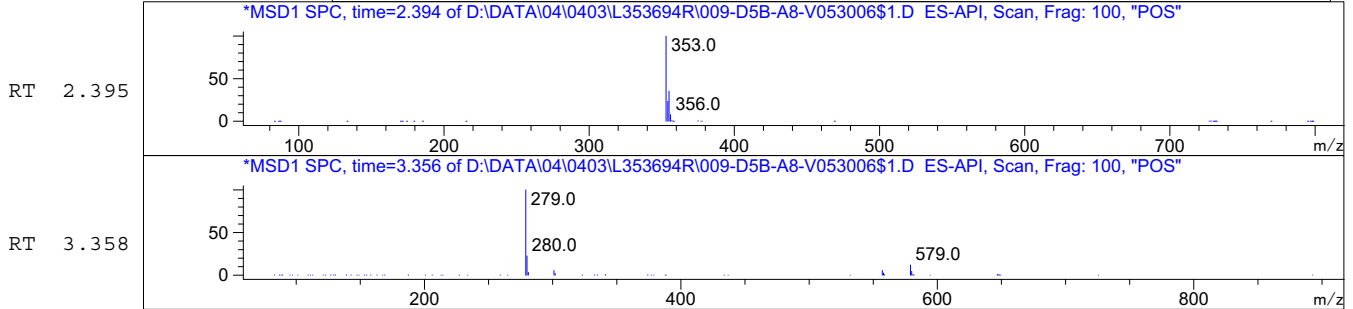

MaxPeak: 100.00%  
Ret\_Time: 1.393 min

V233171\$4

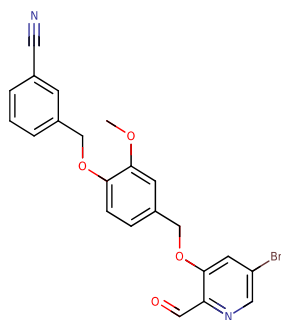

Mol Wt 453.28  
Exact Mass 454.05

| # | Time  | Area%  |
|---|-------|--------|
| 1 | 1.393 | 100.00 |

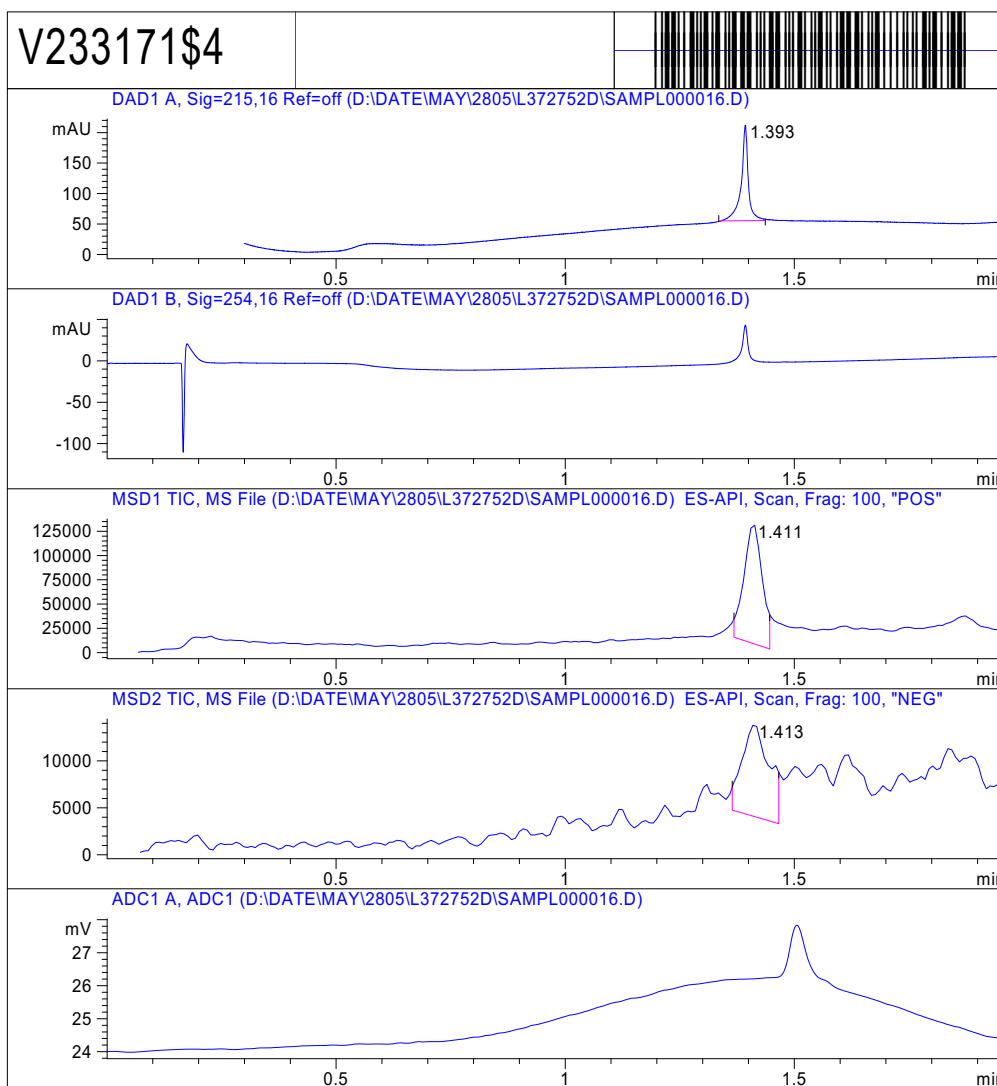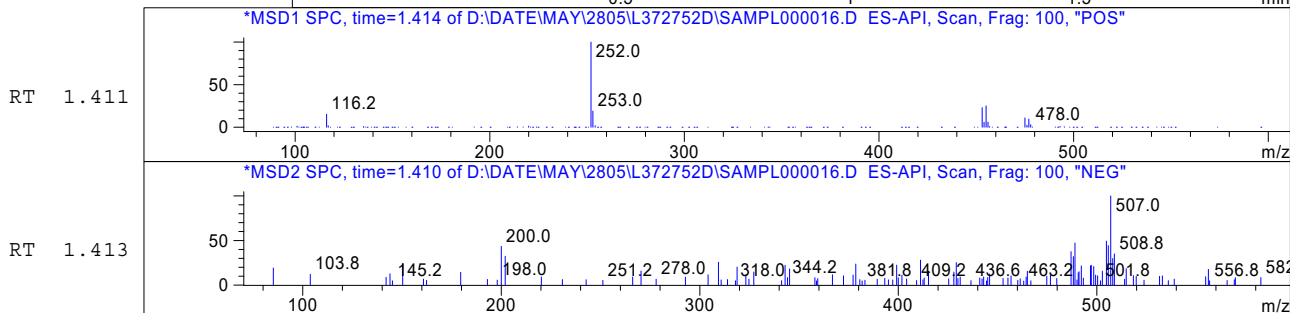

# V608763\$7

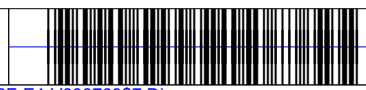

MaxPeak: 100.00%  
Ret\_Time: 1.483 min

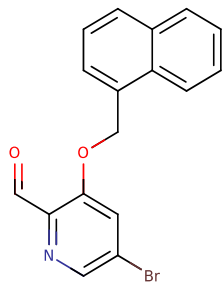

Mol Wt 342.19  
Exact Mass 341.02

| # | Time  | Area%  |
|---|-------|--------|
| 1 | 1.483 | 100.00 |

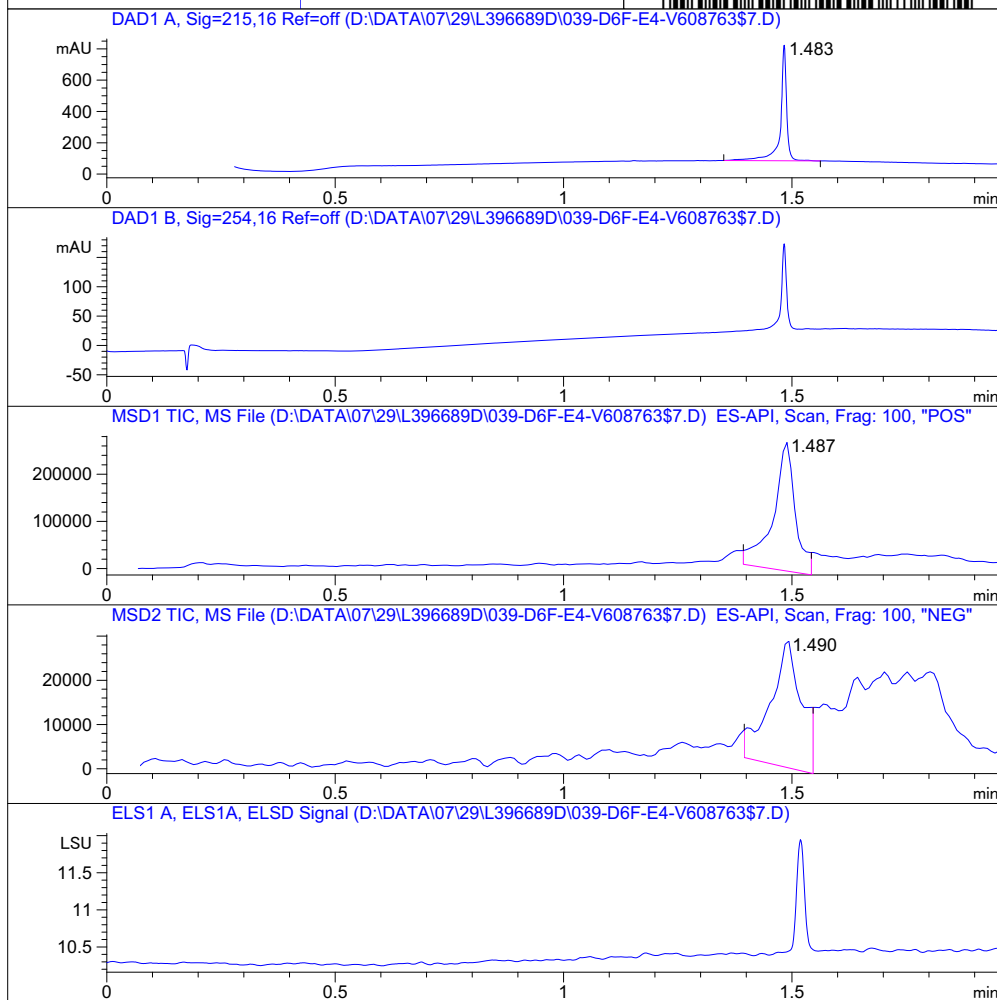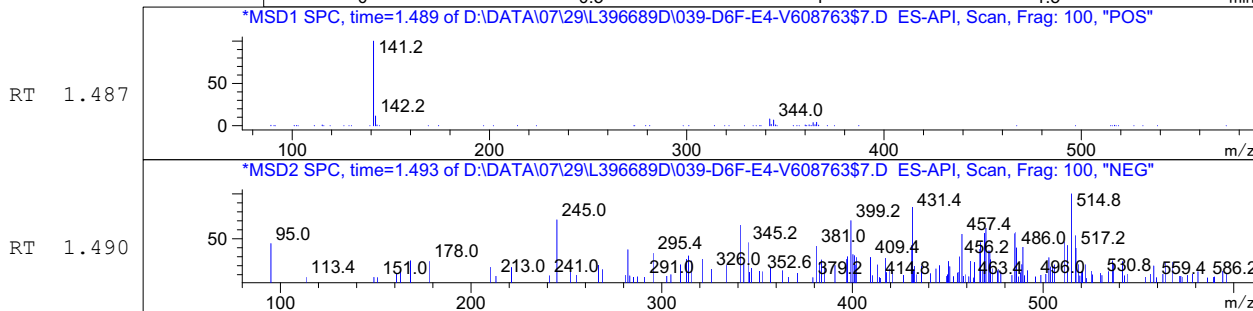

MaxPeak: 100.00%  
Ret\_Time: 1.488 min

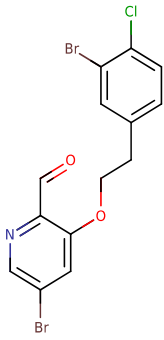

Mol Wt 419.5  
Exact Mass 418.89

| # | Time  | Area%  |
|---|-------|--------|
| 1 | 1.488 | 100.00 |

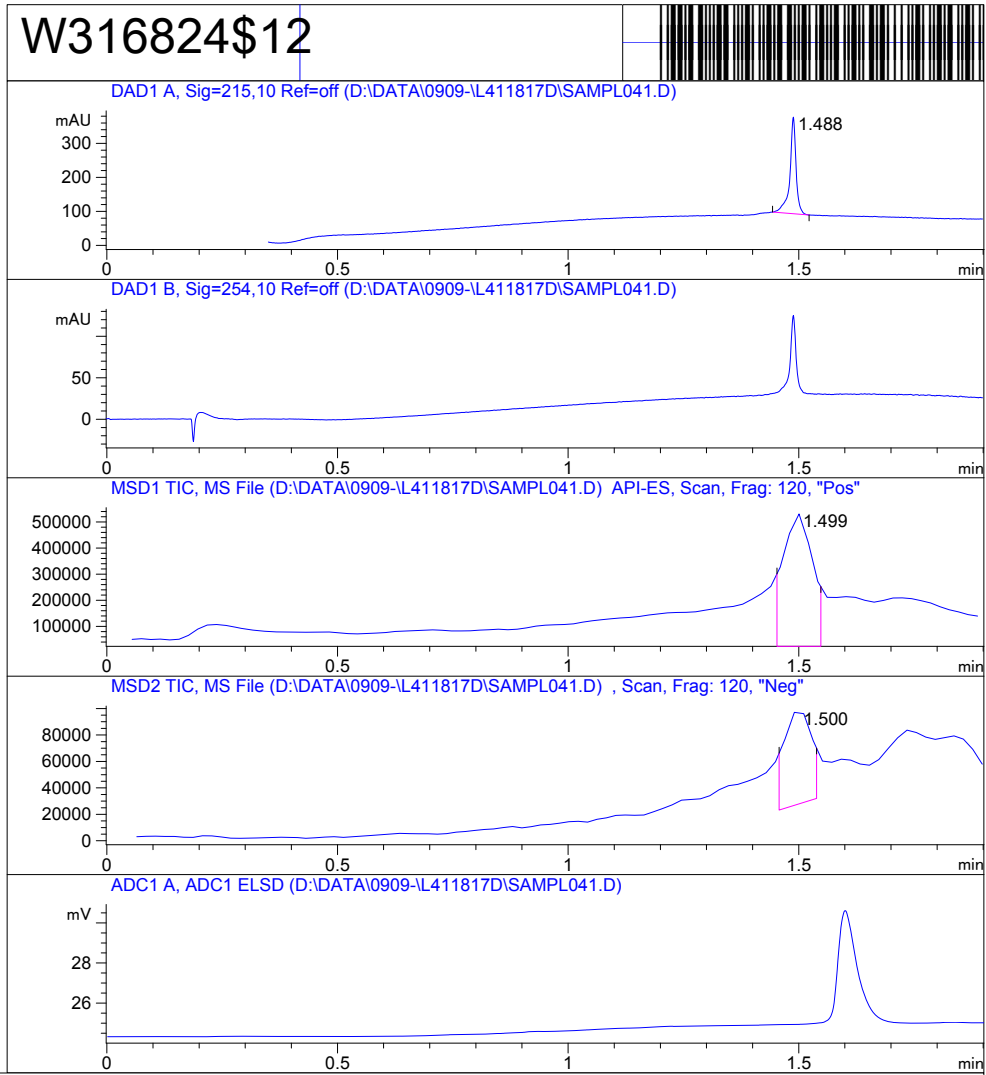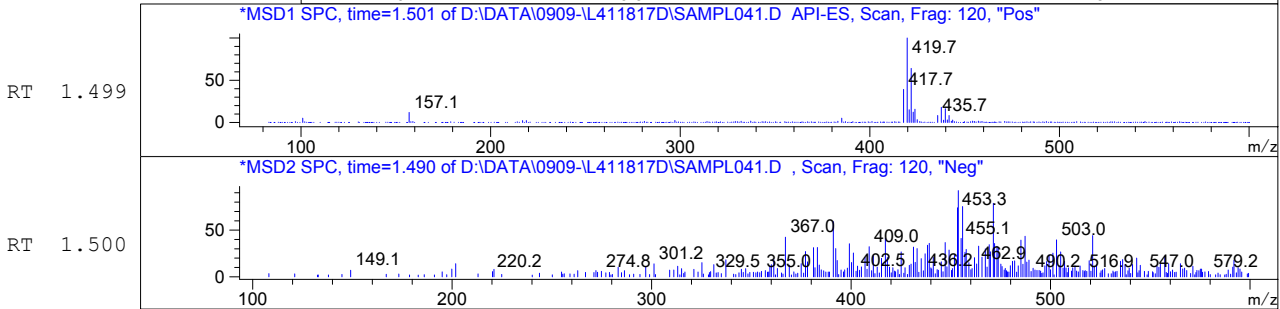

Inj.Date 9/9/2021

OA

-VL-

Acq. Method C:\HPCHEM\ ->

->

Z5192779061\_

MaxPeak: 100.00%  
Ret\_Time: 1.377 min

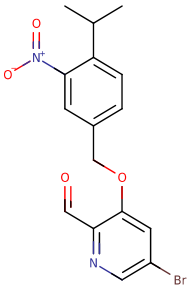

Mol Wt 379.2  
Exact Mass 378.03

| # | Time  | Area%  |
|---|-------|--------|
| 1 | 1.377 | 100.00 |

W495913\$1

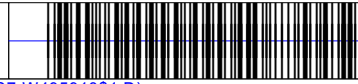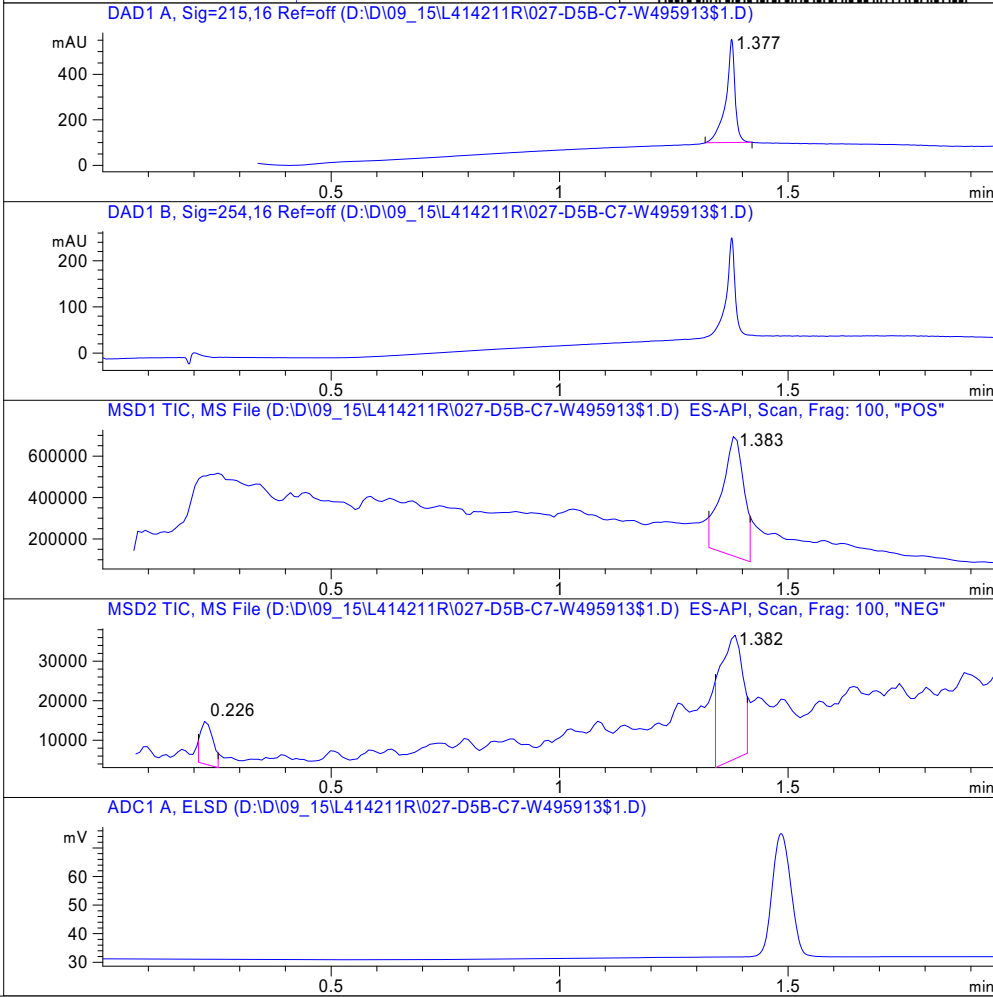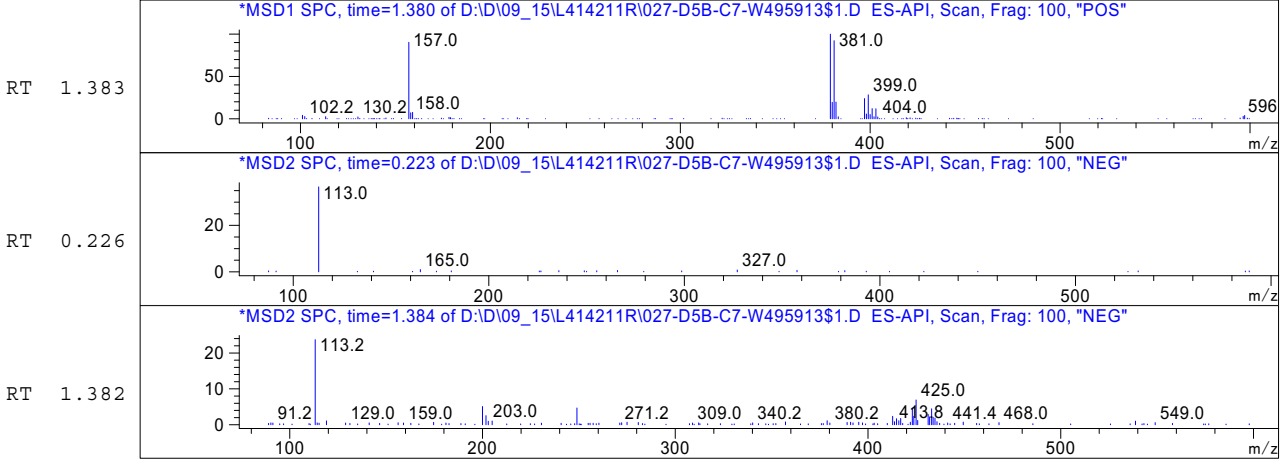



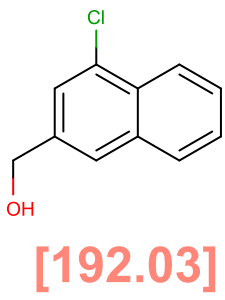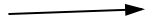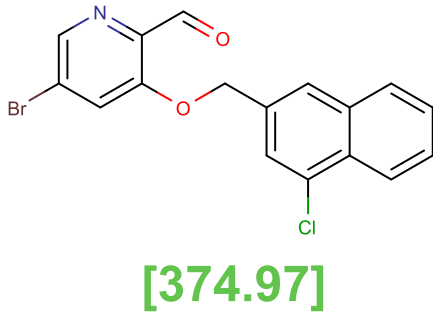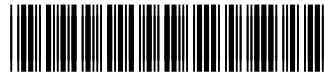

V942078-1

L411799F  
 LCMS-16  
 SUPOR\_30.M  
 09:49 09.09.2021  
 MaxPeak: 100.0%

| # | RT    | DAD1A  | DAD1B  | MSD1   | MSD2 | ELSD   | MSD1 ions                     | MSD1 rt | MSD2 ions | MSD2 rt | Info               |
|---|-------|--------|--------|--------|------|--------|-------------------------------|---------|-----------|---------|--------------------|
| 1 | 1.549 | 100.0% | 100.0% | 100.0% | ---  | 100.0% | 175.0(51),377.8(26),375.8(16) | 1.554   | ---       | ---     | Reagent1 -OH,P +H+ |

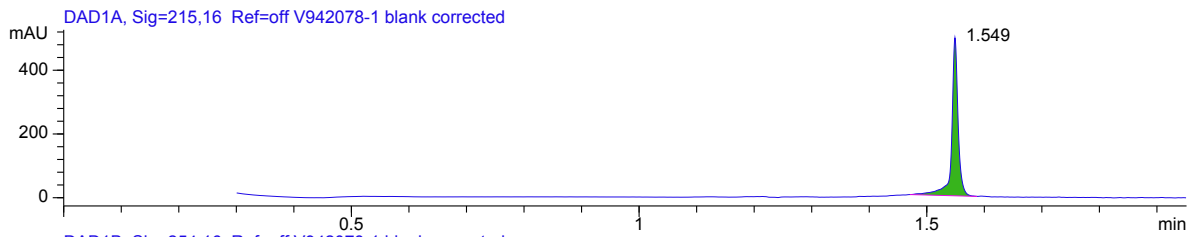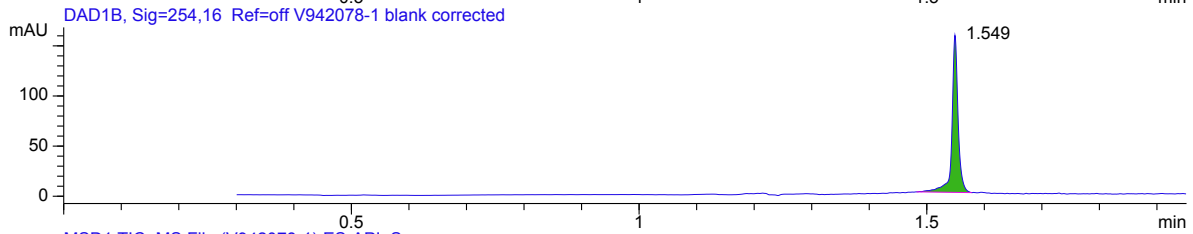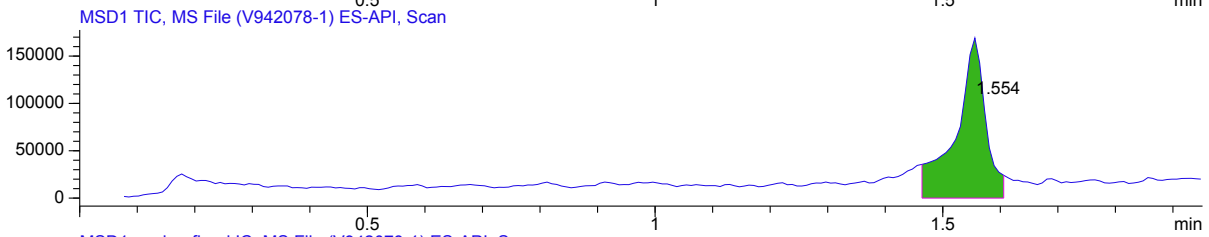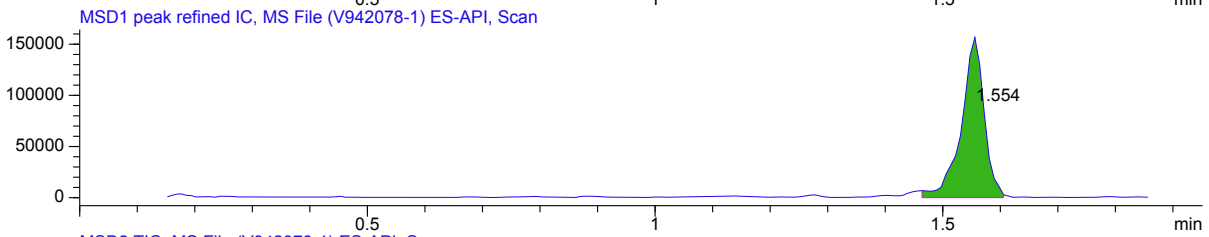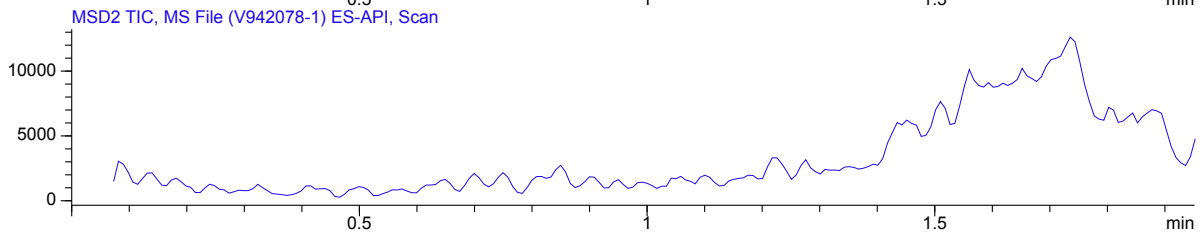

MaxPeak: 100.00%  
Ret\_Time: 1.396 min

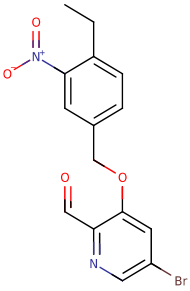

Mol Wt 365.18  
Exact Mass 364.01

| # | Time  | Area%  |
|---|-------|--------|
| 1 | 1.396 | 100.00 |

# W529955\$2

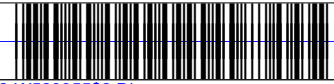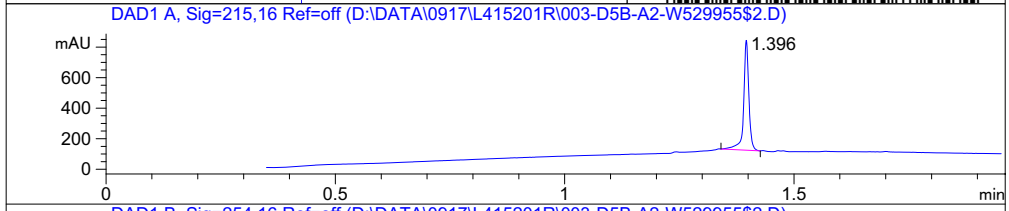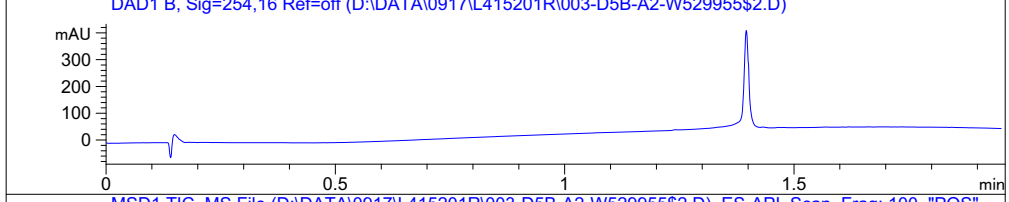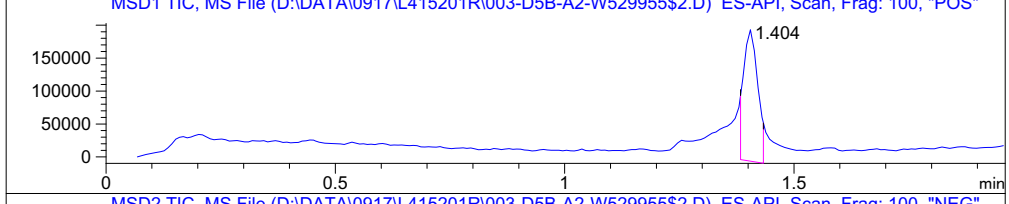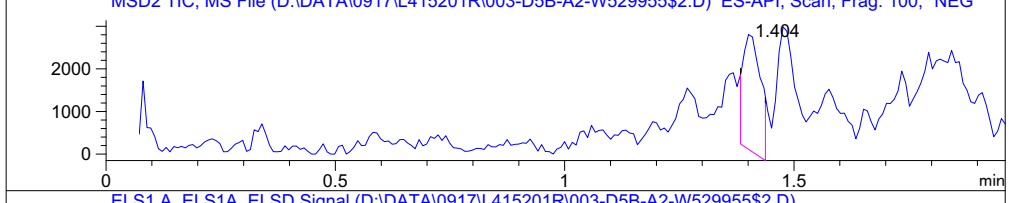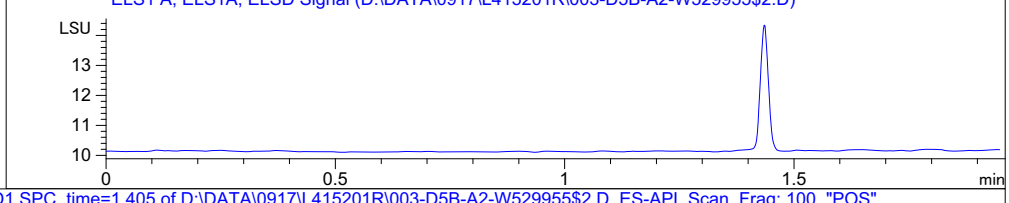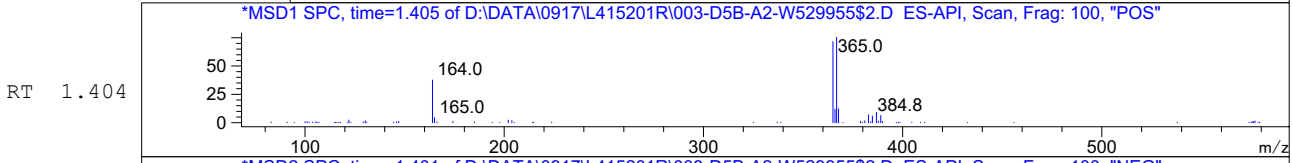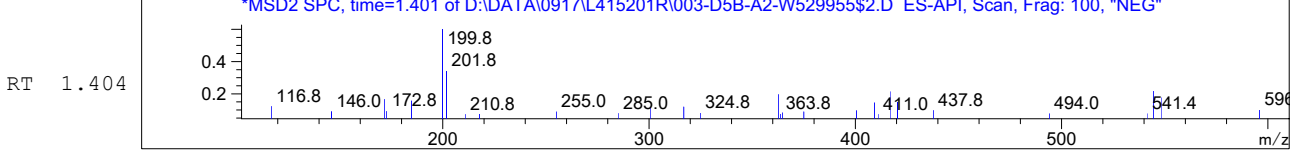

U920104\$26

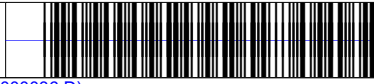

MaxPeak: 100.00%  
Ret\_Time: 1.226 min

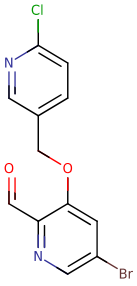

Mol Wt 327.56  
Exact Mass 327.95

| # | Time  | Area%  |
|---|-------|--------|
| 1 | 1.226 | 100.00 |

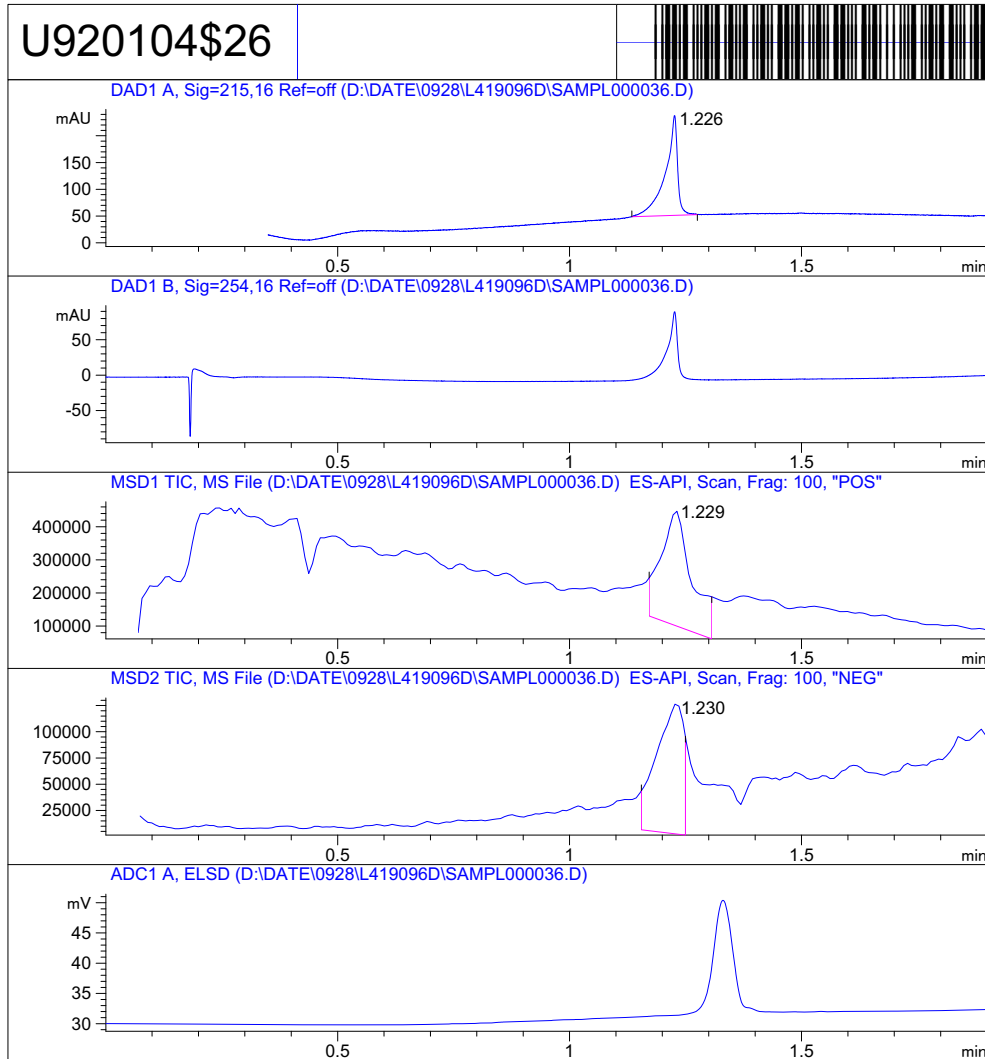

RT 1.229

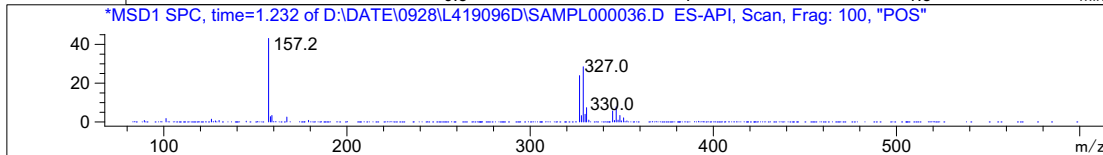

RT 1.230

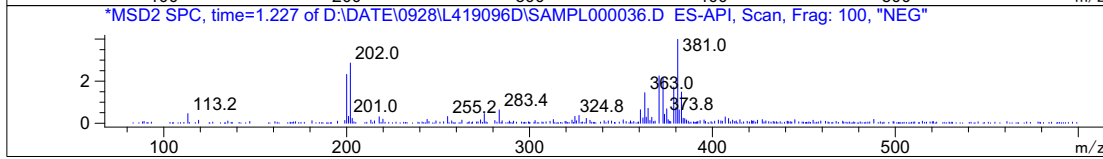

MaxPeak: 100.00%  
Ret\_Time: 1.300 min

W828537\$5

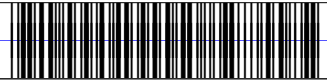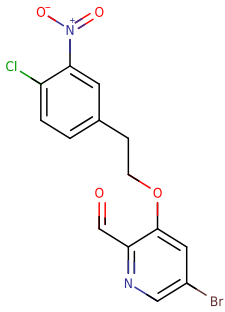

Mol Wt 385.6  
Exact Mass 385.95

| # | Time  | Area%  |
|---|-------|--------|
| 1 | 1.300 | 100.00 |

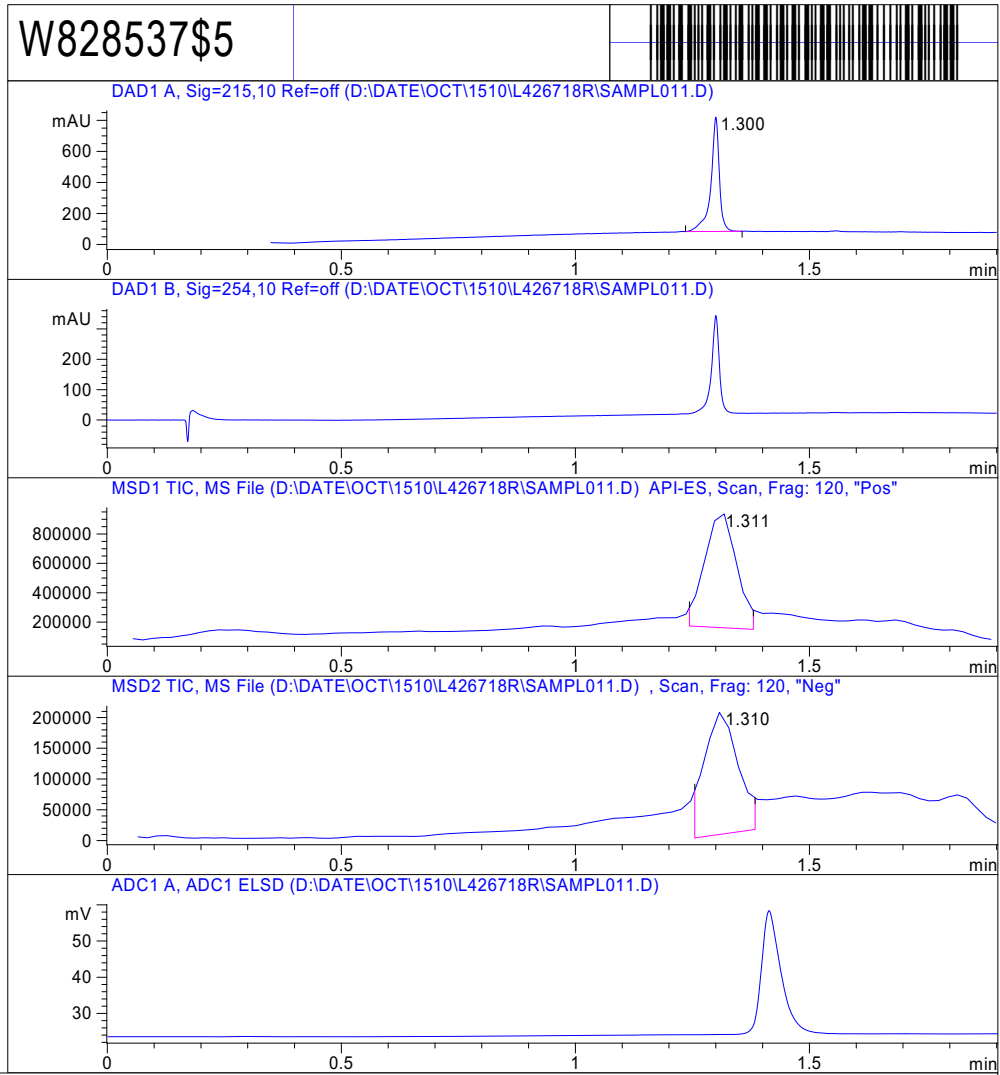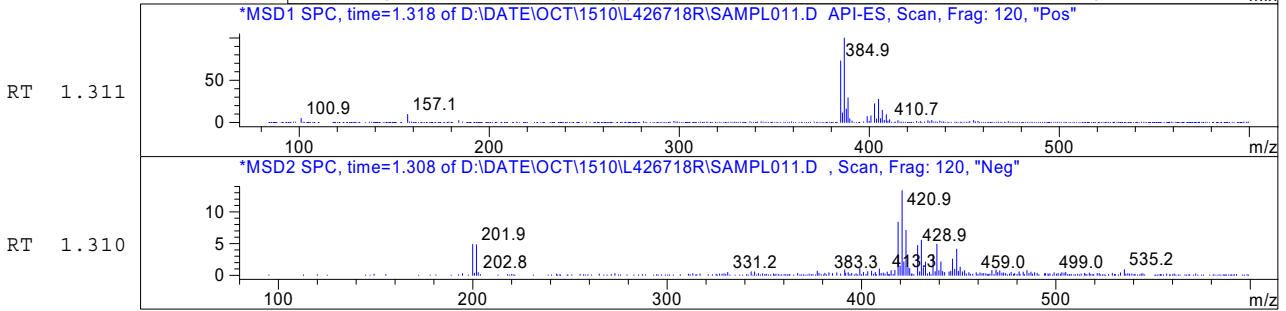

Inj.Date 10/15/2021

Y

-VL-

Acq. Method C:\HPCHEM\ ->

->

Z5192779054\_

MaxPeak: 100.00%  
Ret\_Time: 1.528 min

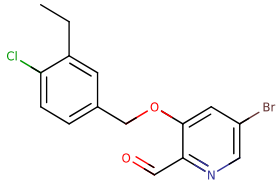

Mol Wt 354.63  
Exact Mass 355

| # | Time  | Area%  |
|---|-------|--------|
| 1 | 1.528 | 100.00 |

W938418\$2

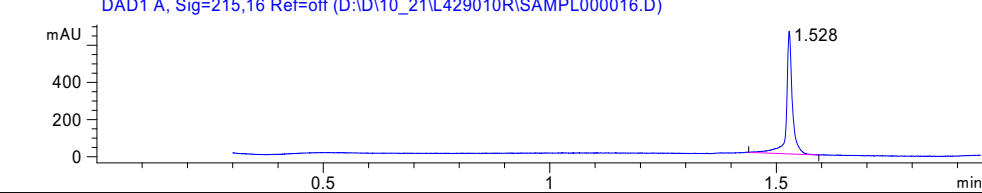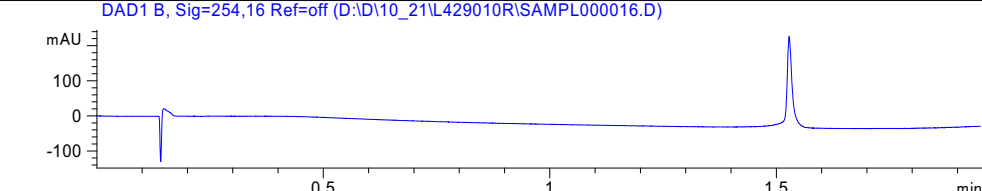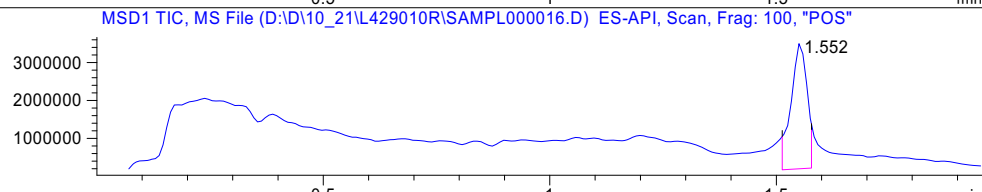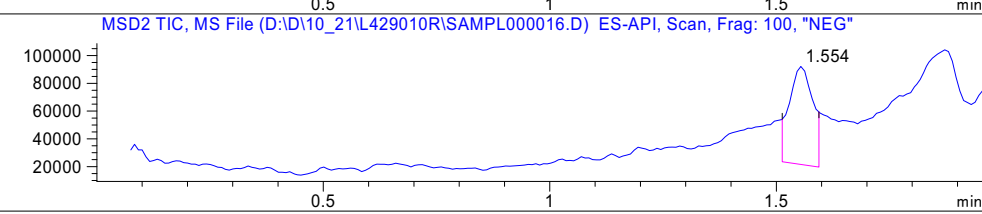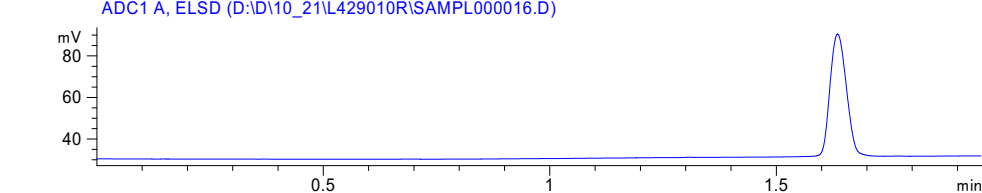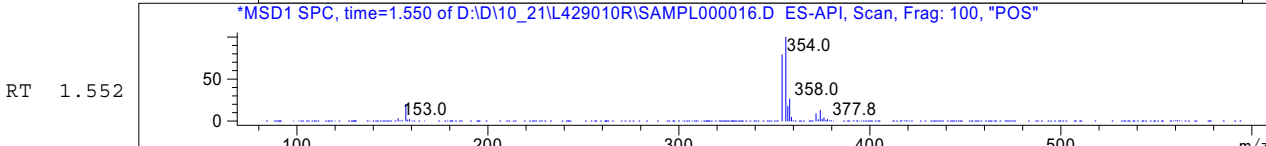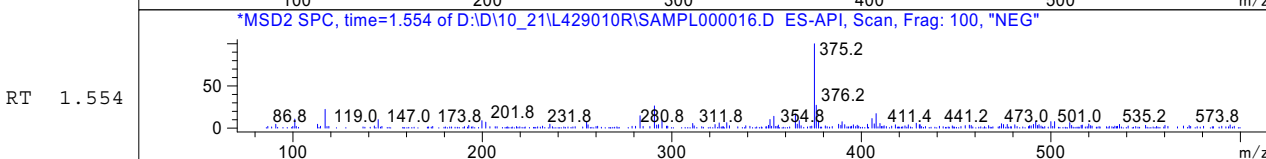

MaxPeak: 100.00%  
Ret\_Time: 1.483 min

W976013\$2

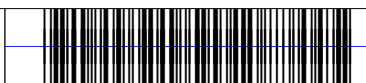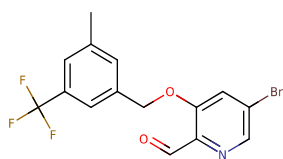

Mol Wt 374.15  
Exact Mass 373.01

| # | Time  | Area%  |
|---|-------|--------|
| 1 | 1.483 | 100.00 |

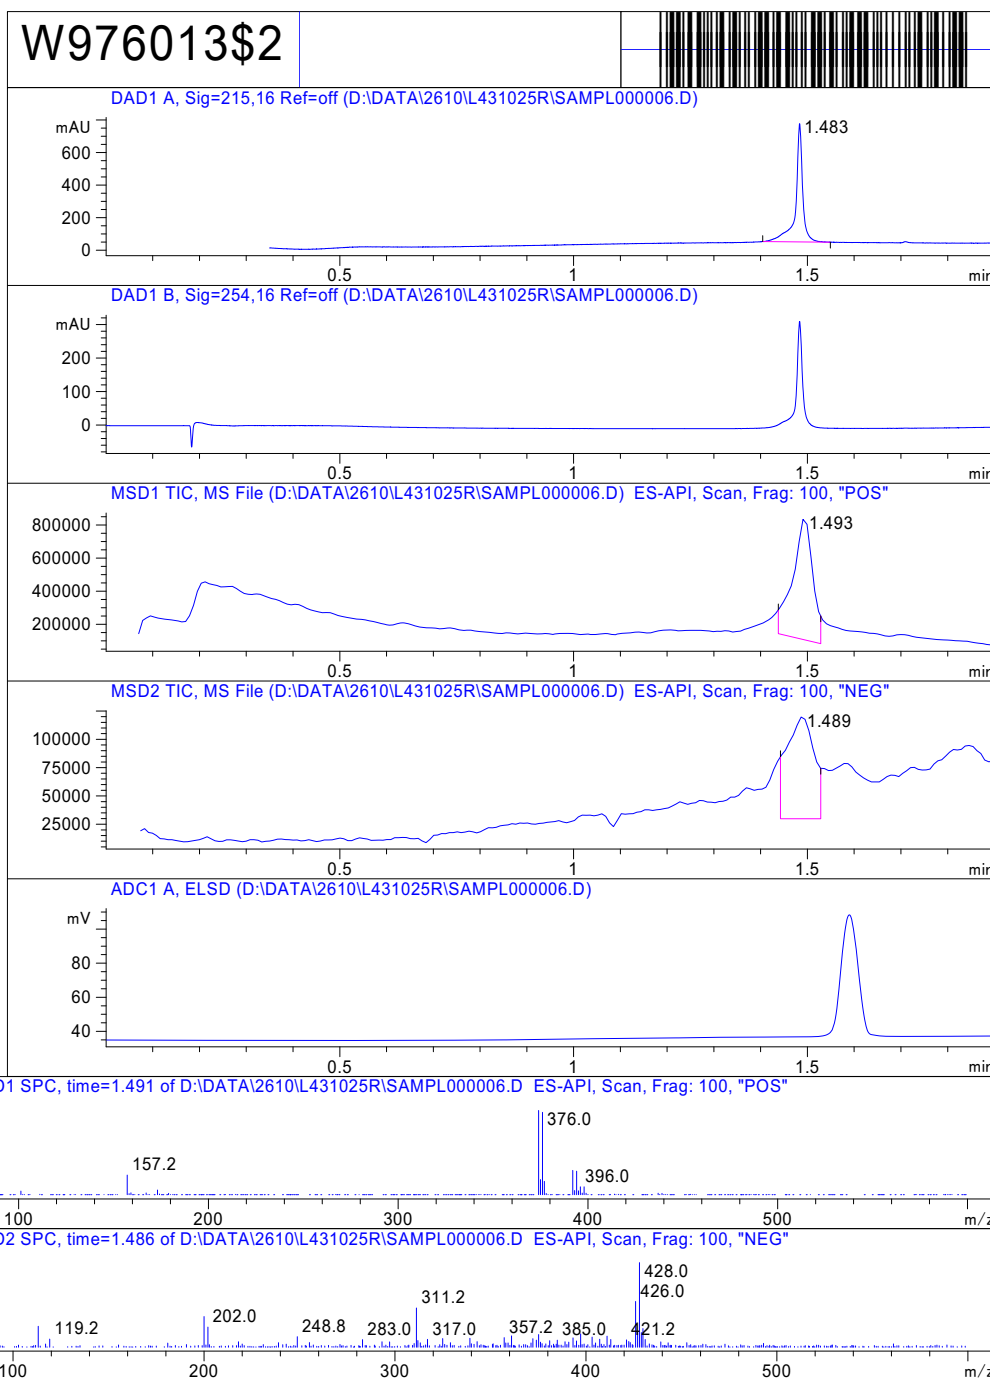

MaxPeak: 100.00%  
Ret\_Time: 1.325 min

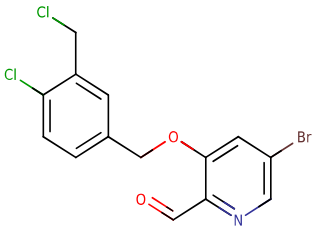

Mol Wt 375.04  
Exact Mass 374.94

| # | Time  | Area%  |
|---|-------|--------|
| 1 | 1.325 | 100.00 |

# X349051\$1

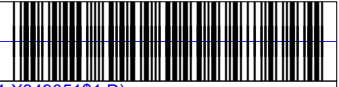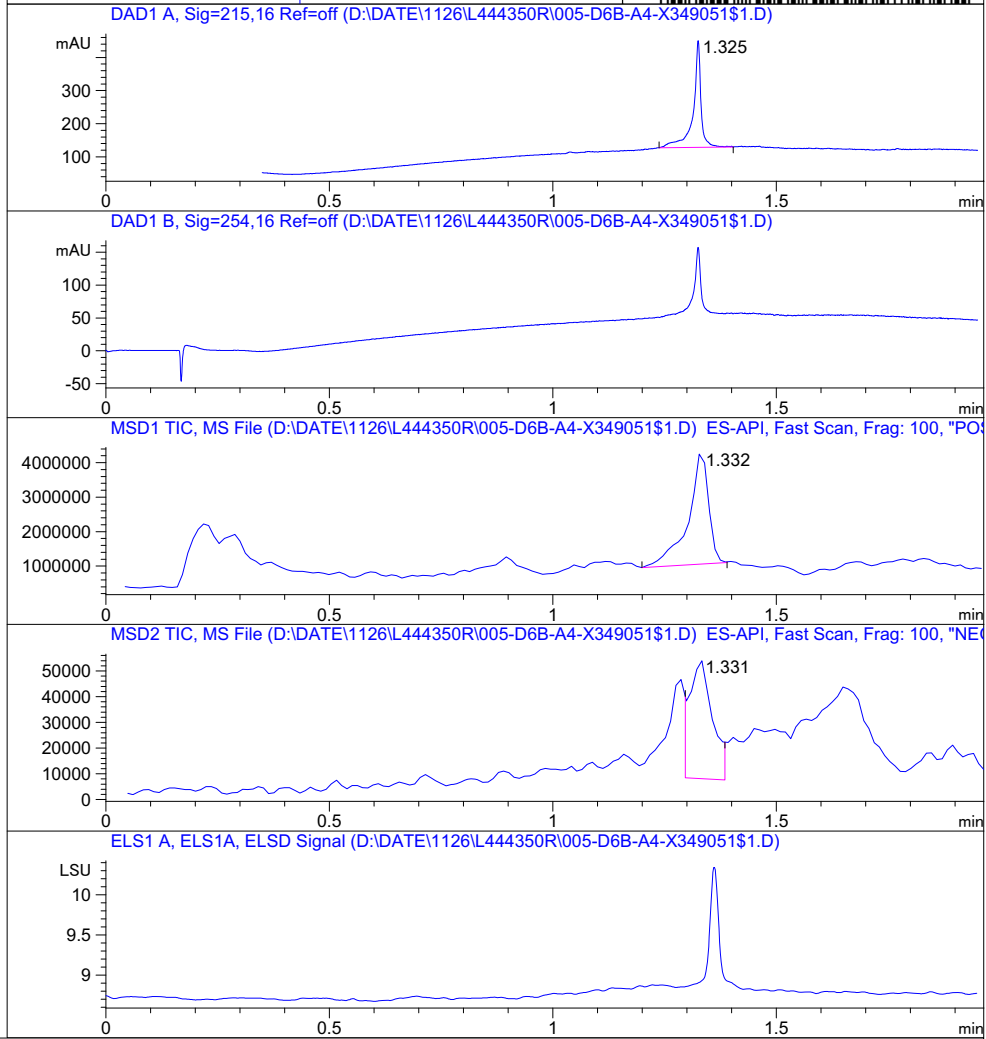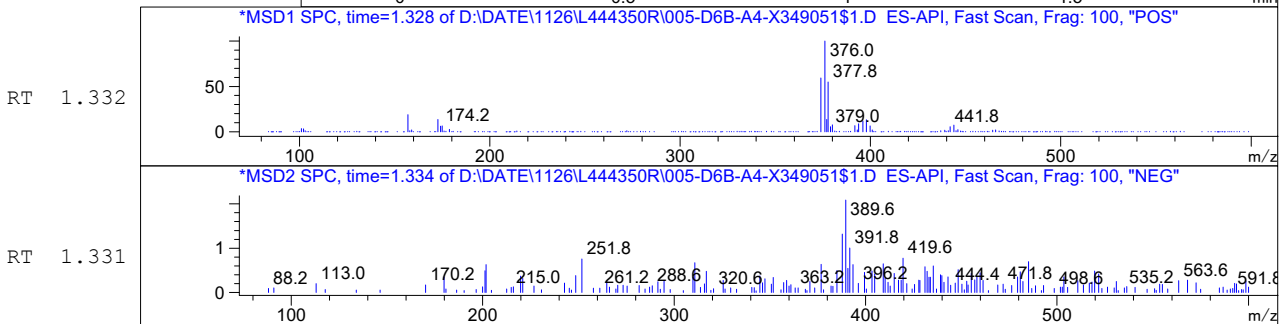

Inj.Date 11/26/2021

E

Acq. Method C:\Users\ -> ->

Z5247643558\_

# Analysis Report

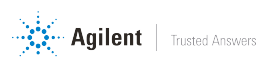

## Sample Information

|            |          |                   |                                            |
|------------|----------|-------------------|--------------------------------------------|
| Name       | R2571204 | Data File Path    | D:\MassHunter\GCMS\1\data\04_20\R2571204.D |
| Comment    | CH3CN    | Acq. Time (Local) | 20-Apr-21 22:22:08 (UTC+03:00)             |
| Instrument | GCMS-5   | Method Path (Acq) | D:\MassHunter\GCMS\1\methods\UNIV_ACN.M    |
| Position   | 33       |                   |                                            |

## Sample Chromatograms

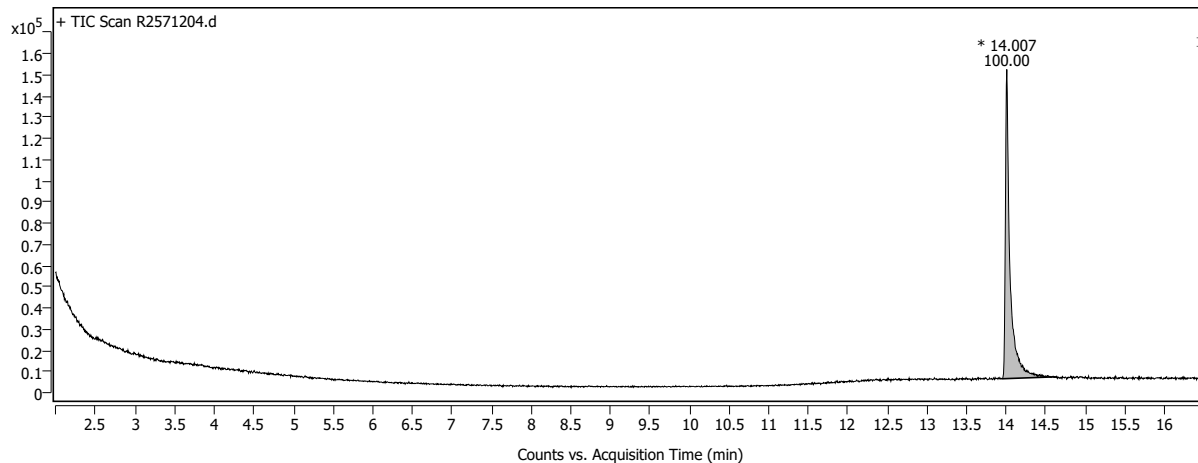

| Chromatogram Peaks |        |        |            |
|--------------------|--------|--------|------------|
| Peak               | RT     | Area   | Area Sum % |
| 1                  | 14.007 | 594625 | 100.00     |

MassHunter Qual 10.0  
(End of Report)



MaxPeak: 100.00%  
Ret\_Time: 0.659 min

# LH103289174

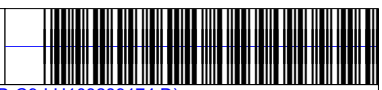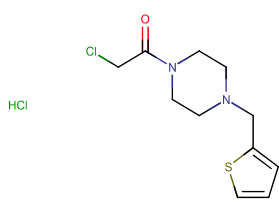

**Mol Wt** 295.23  
**Exact Mass** 258.08

| # | Time  | Area%  |
|---|-------|--------|
| 1 | 0.659 | 100.00 |

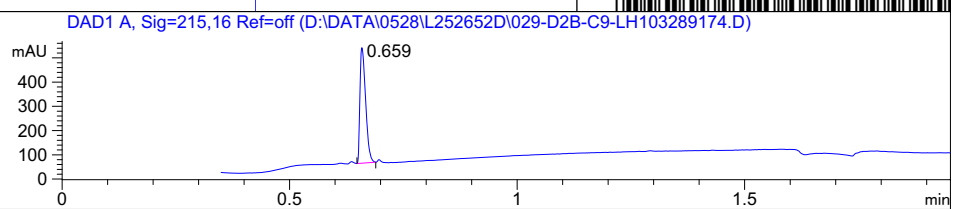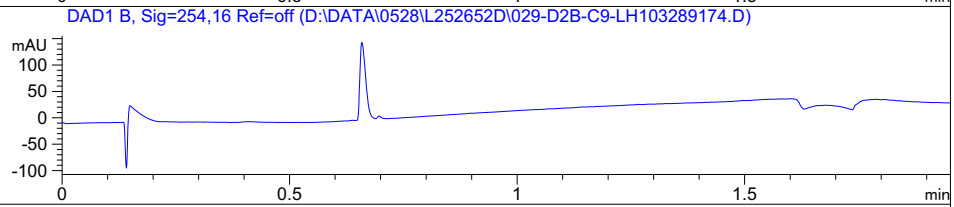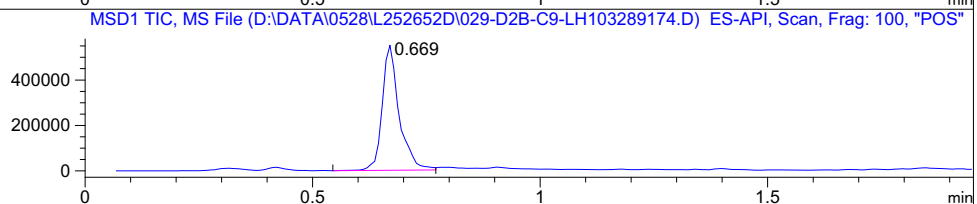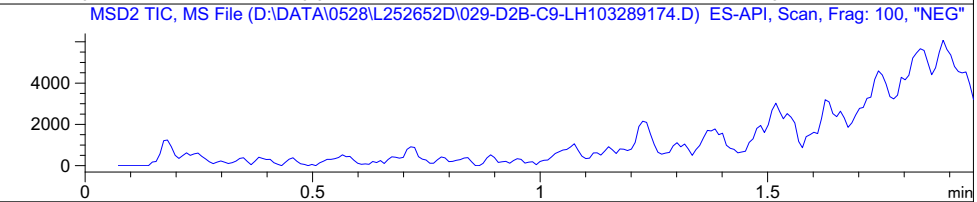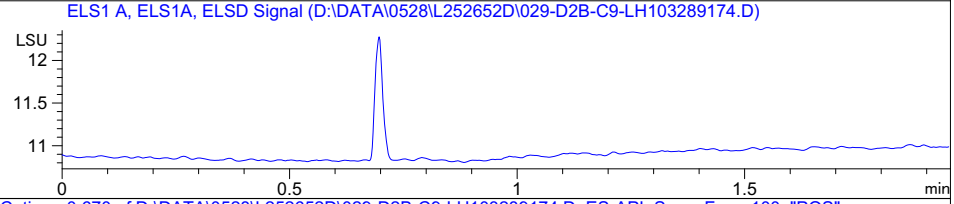

RT 0.669

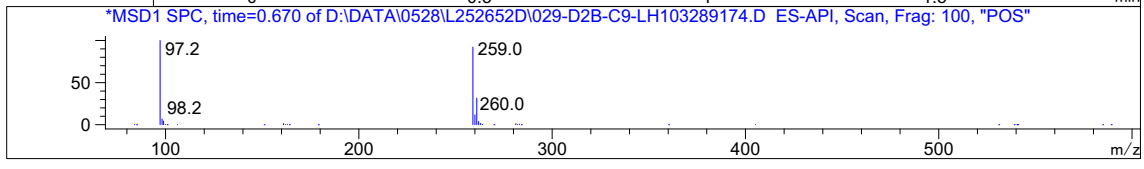

MaxPeak: 98.15%  
Ret\_Time: 1.248 min

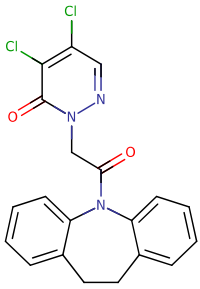

Mol Wt 400.26  
Exact Mass 399.07

| # | Time  | Area% |
|---|-------|-------|
| 1 | 1.248 | 98.15 |
| 2 | 1.292 | 1.85  |

# T6201078

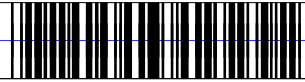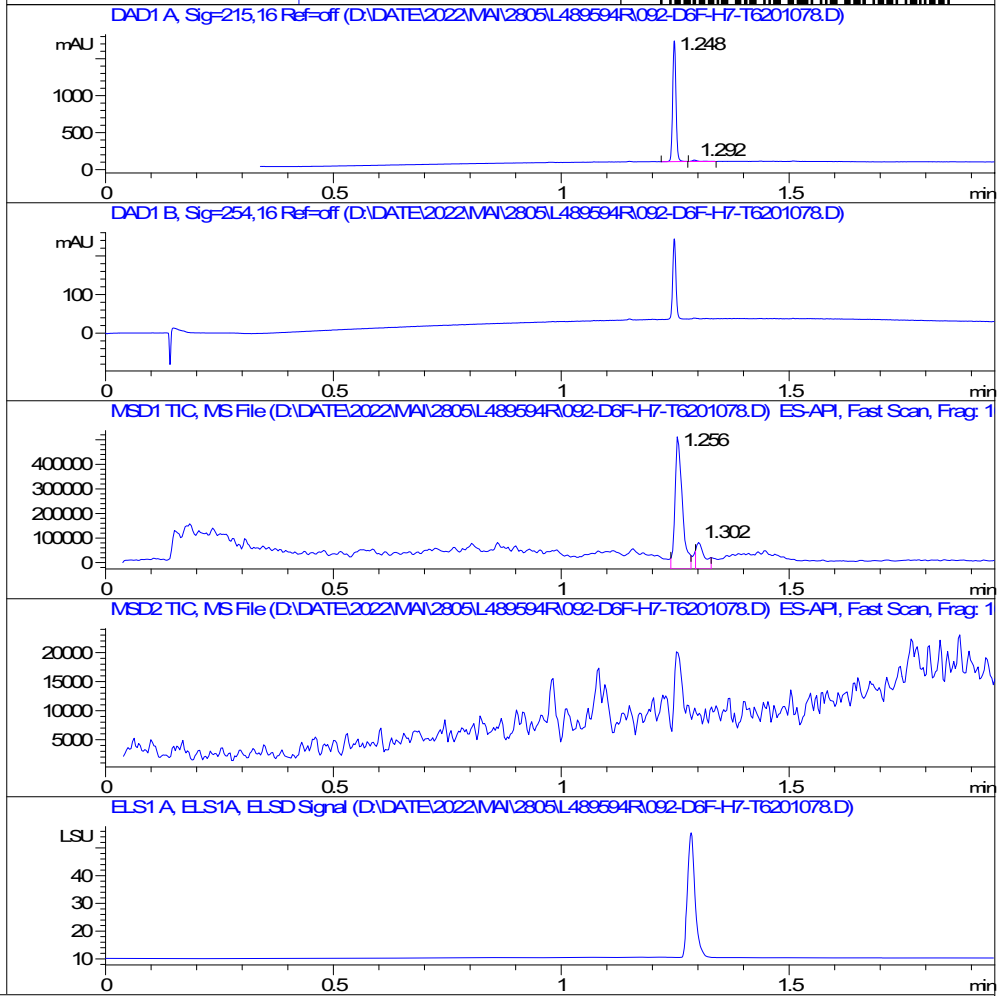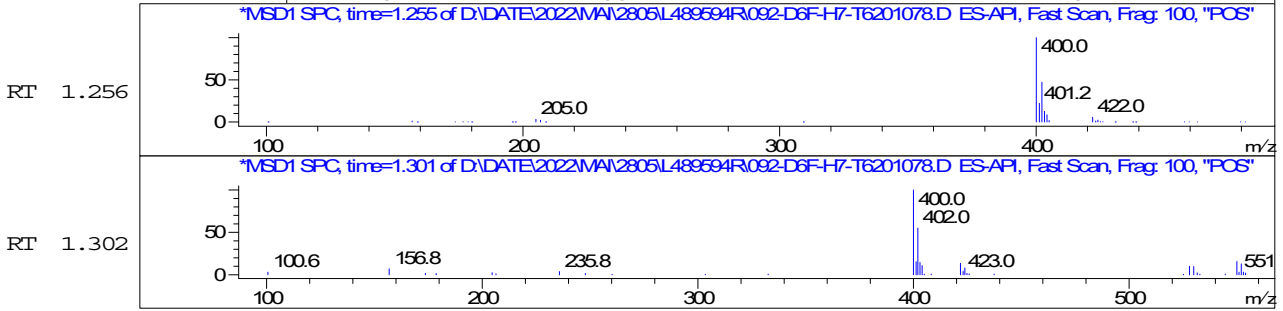

Inj.Date 28-May-22

Z <invalid>

Acq. Method C:\Users\ -> ->

Z335721330\_

MaxPeak: 100.00%  
Ret\_Time: 0.718 min

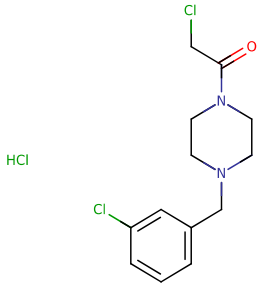

Mol Wt 323.65  
Exact Mass 286.09

| # | Time  | Area%  |
|---|-------|--------|
| 1 | 0.718 | 100.00 |

T6330170

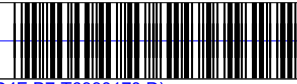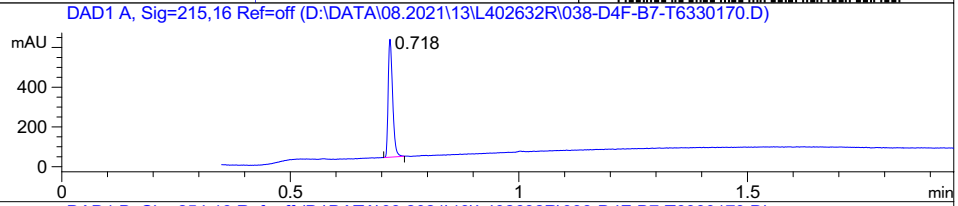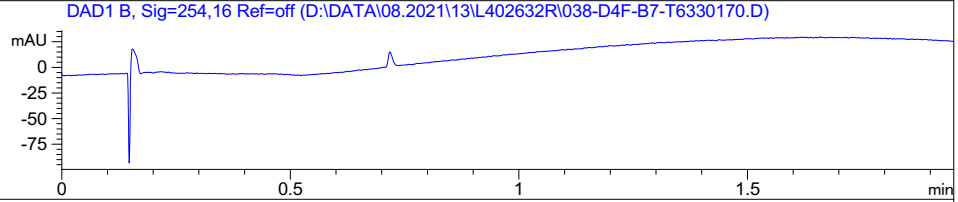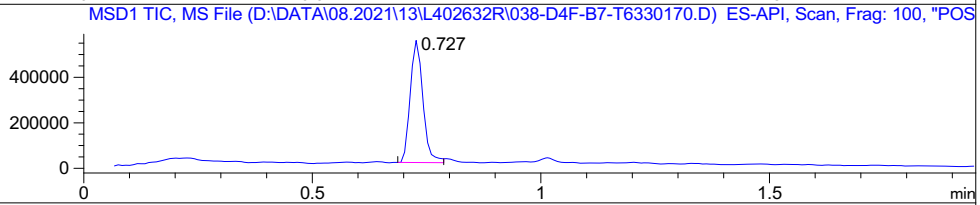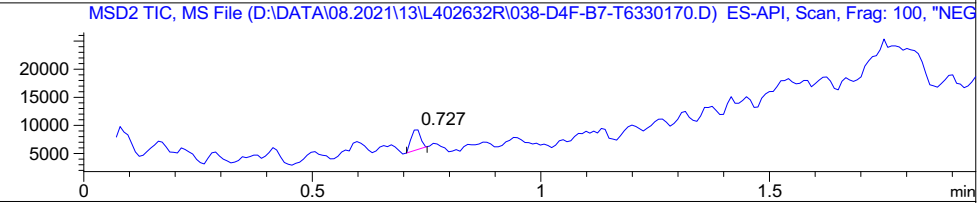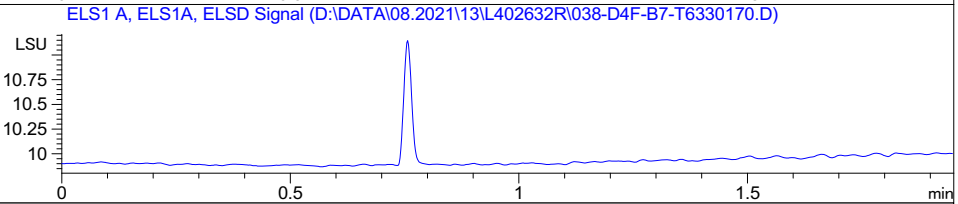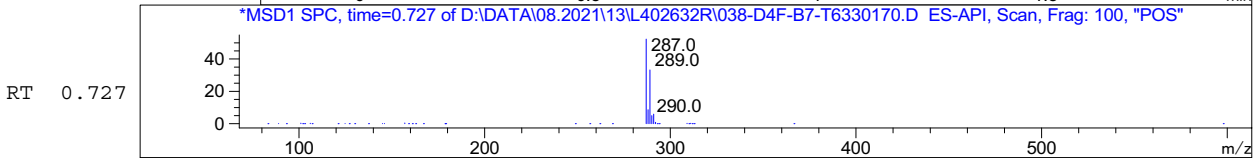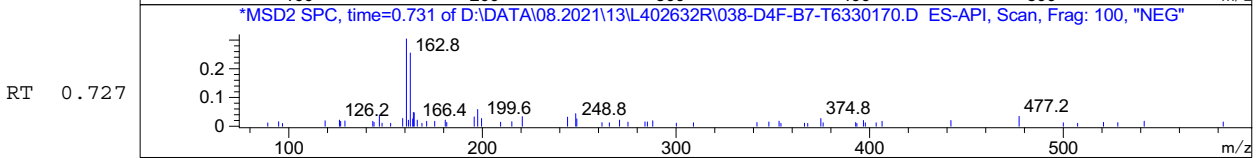

Inj.Date 8/13/2021

CH <invalid> -18-

Acq. Method C:\Chem32\ -> ->

Z147647726\_

MaxPeak: 100.00%  
Ret\_Time: 1.440 min

V374147\$4

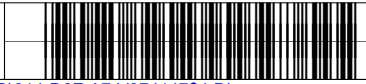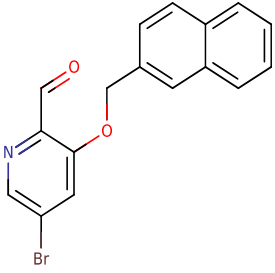

Mol Wt 342.19  
Exact Mass 341.02

| # | Time  | Area%  |
|---|-------|--------|
| 1 | 1.440 | 100.00 |

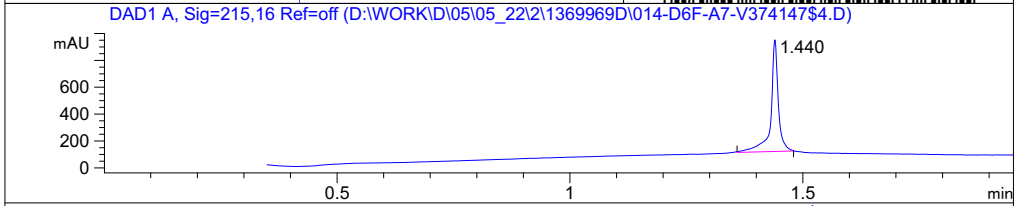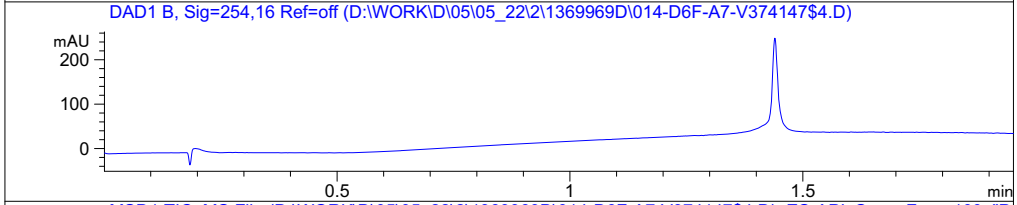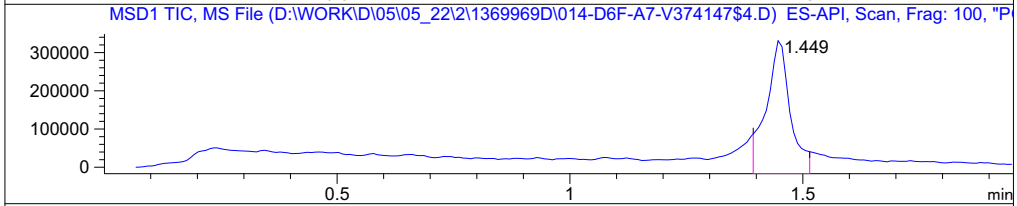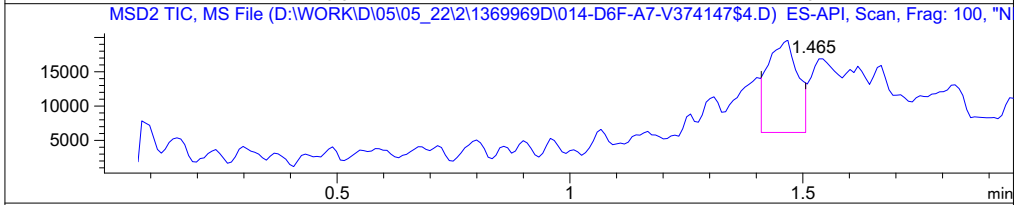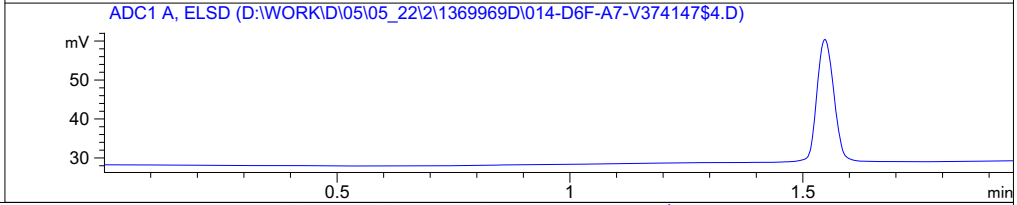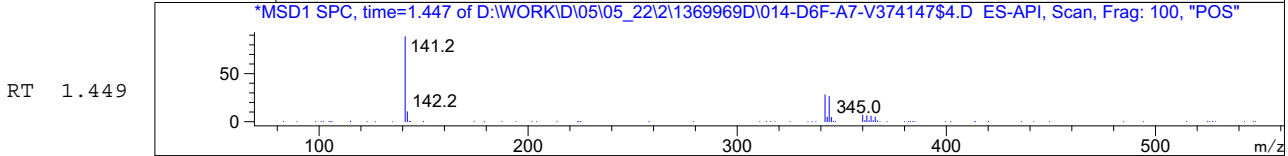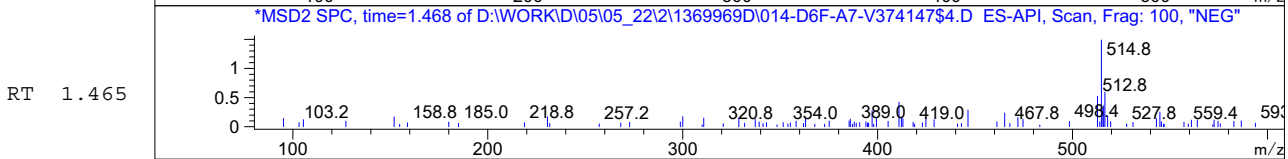

# W557422\$R

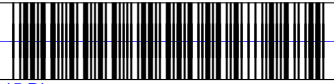

MaxPeak: 100.00%  
Ret\_Time: 1.550 min

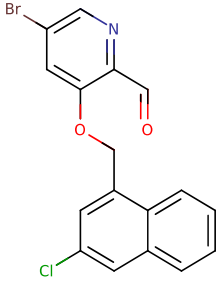

Mol Wt 376.63  
Exact Mass 376.98

| # | Time  | Area%  |
|---|-------|--------|
| 1 | 1.550 | 100.00 |

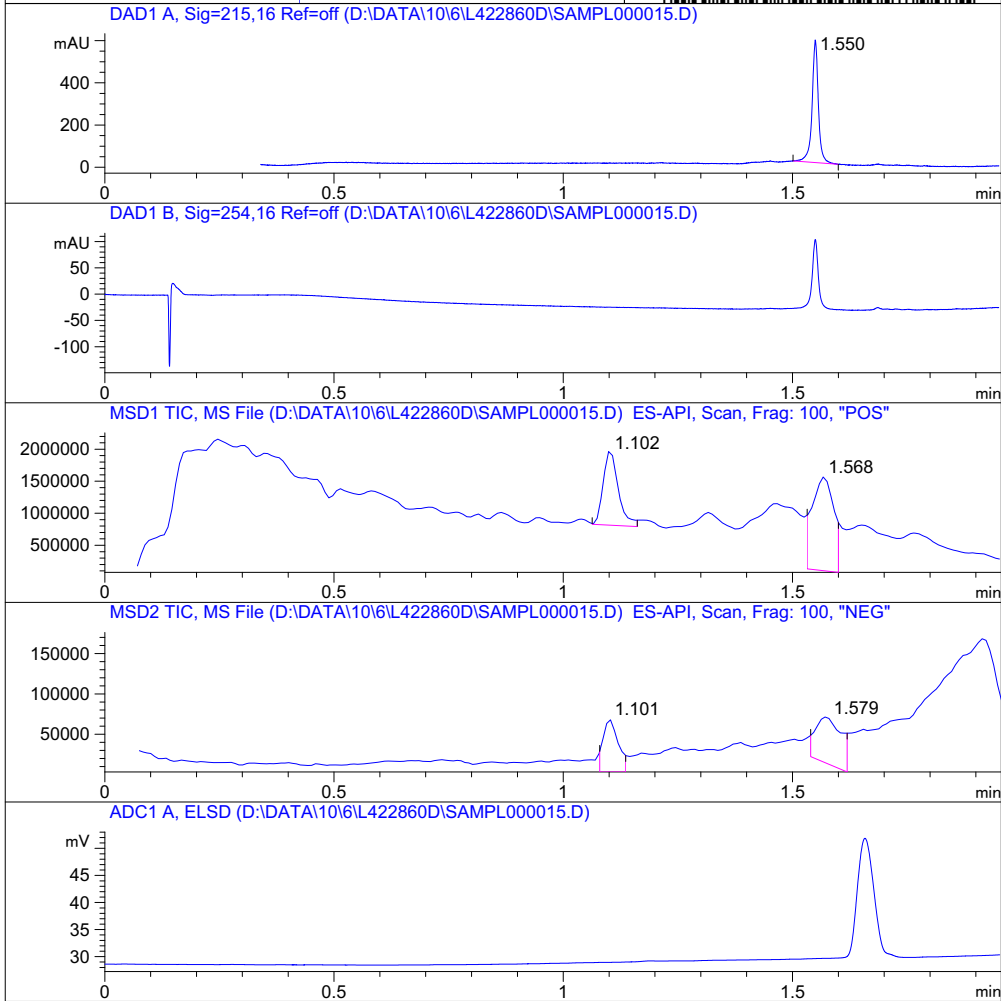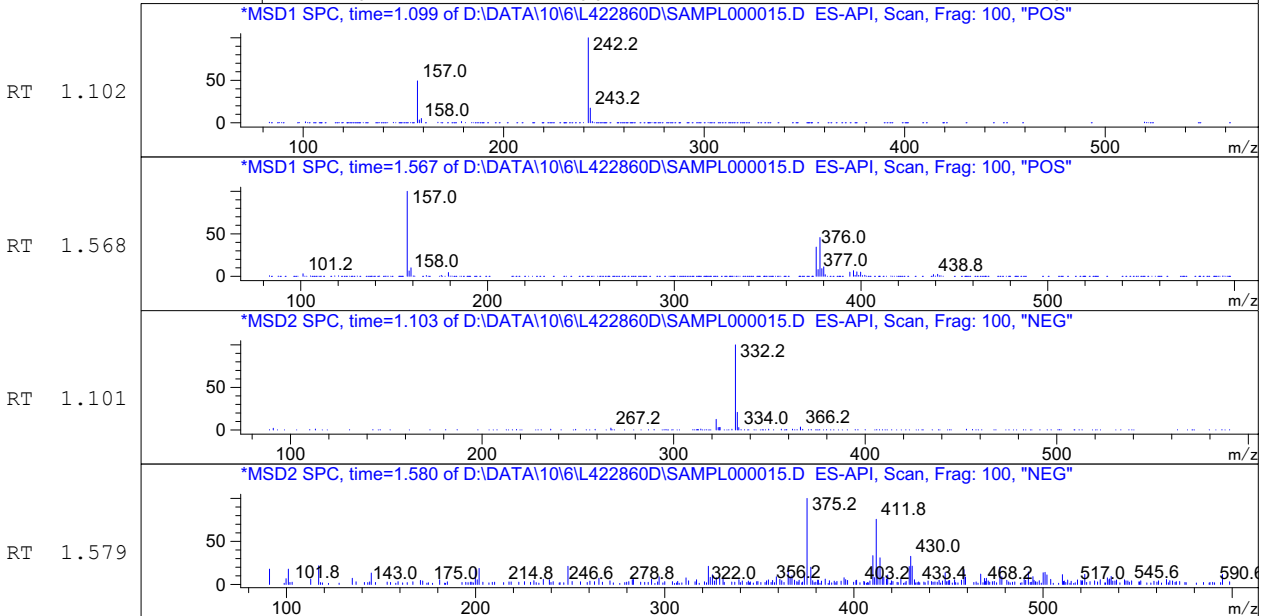

MaxPeak: 80.83%  
Ret\_Time: 1.043 min

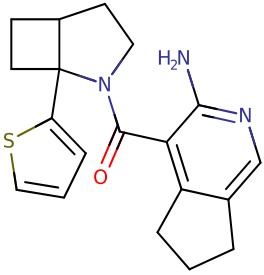

Mol Wt 339.46  
Exact Mass 339.17

| # | Time  | Area% |
|---|-------|-------|
| 1 | 0.632 | 19.17 |
| 2 | 1.043 | 80.83 |

# H3599927

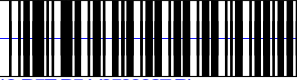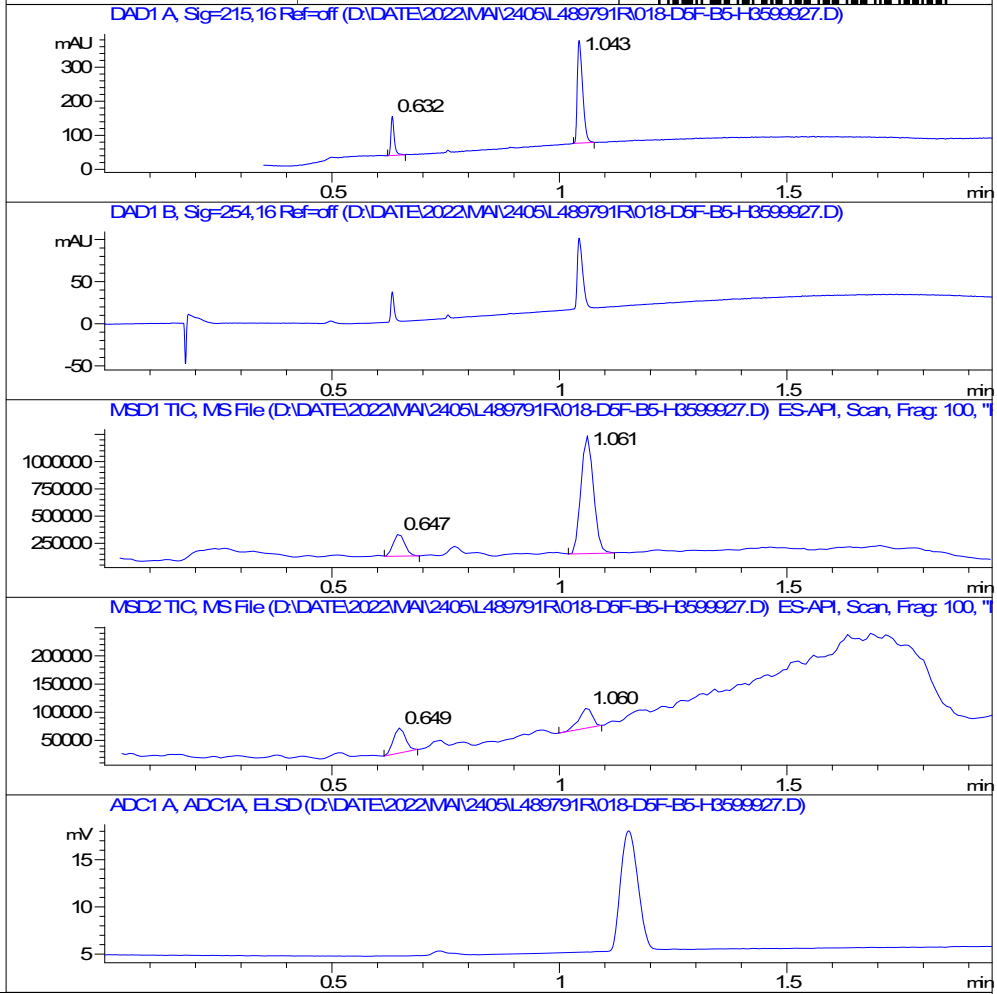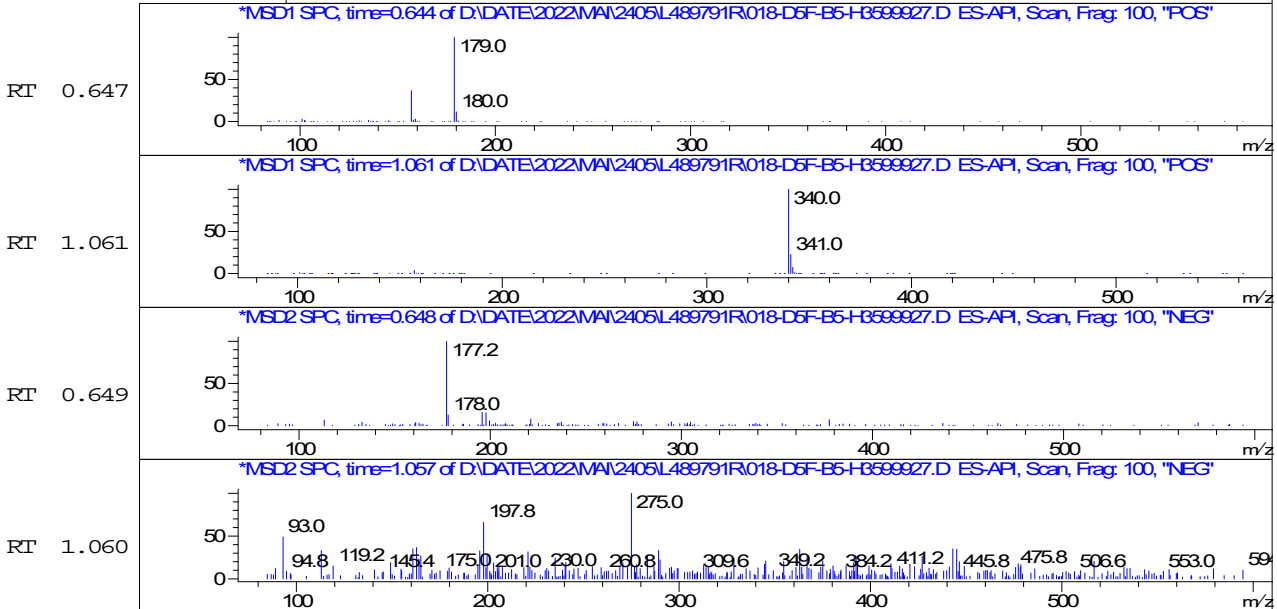

Inj.Date 24-May-22

Z

<invalid> -25-

Acq. Method C:\Users\ -> ->

Z4124468376\_

MaxPeak: 100.00%  
Ret\_Time: 1.237 min

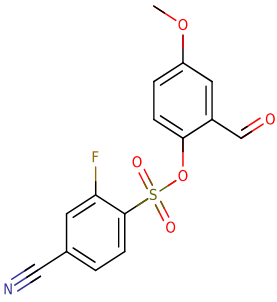

Mol Wt 335.31  
Exact Mass 335.02

| # | Time  | Area%  |
|---|-------|--------|
| 1 | 1.237 | 100.00 |

# GULO

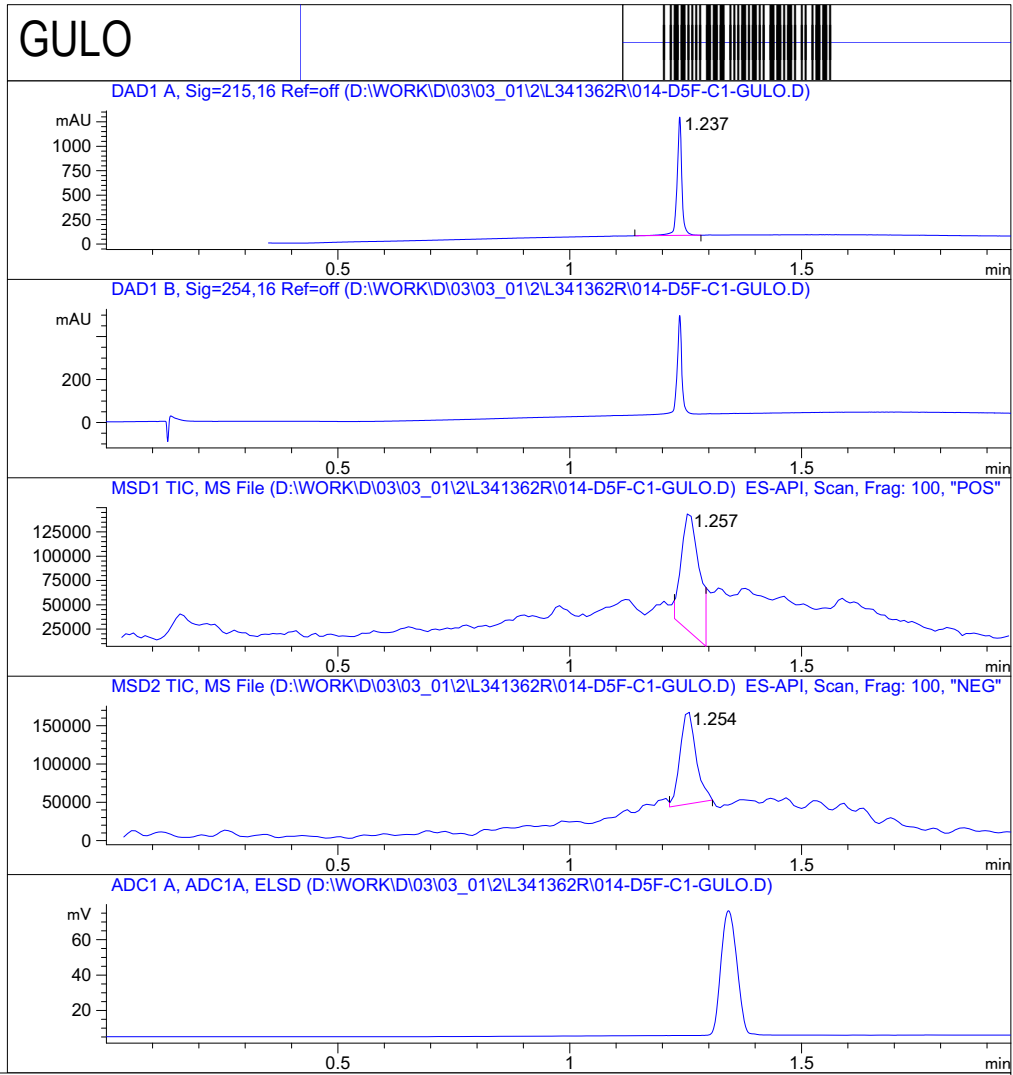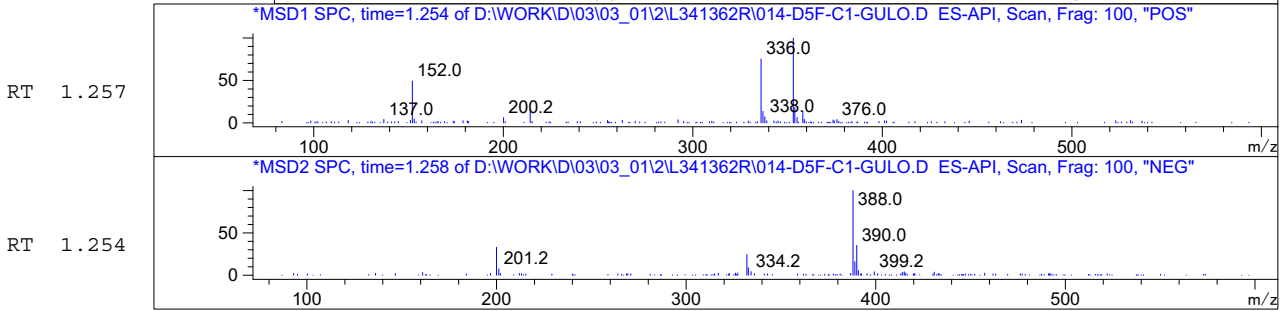

MaxPeak: 100.00%  
Ret\_Time: 1.468 min

V233166\$4

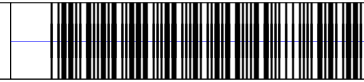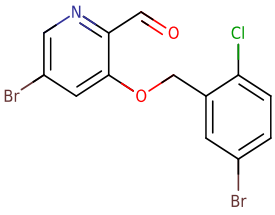

Mol Wt 405.47  
Exact Mass 404.87

| # | Time  | Area%  |
|---|-------|--------|
| 1 | 1.468 | 100.00 |

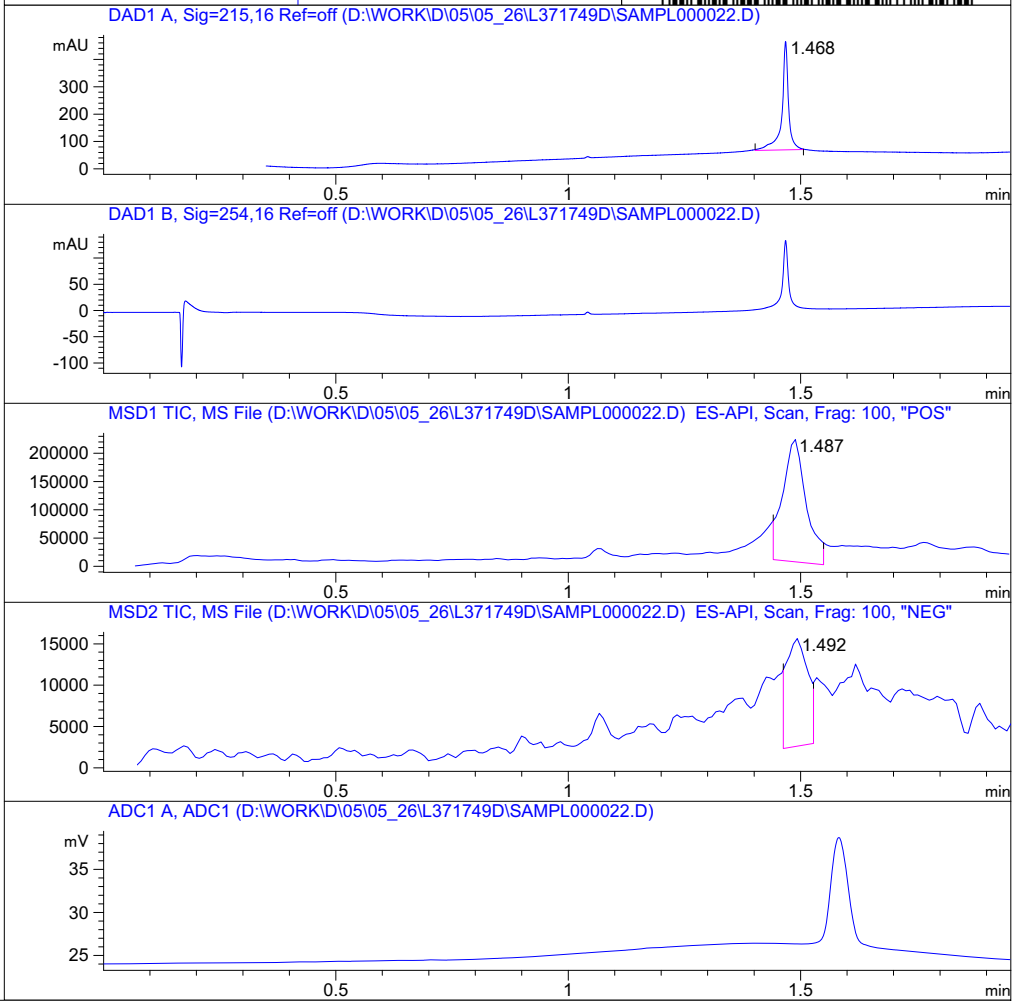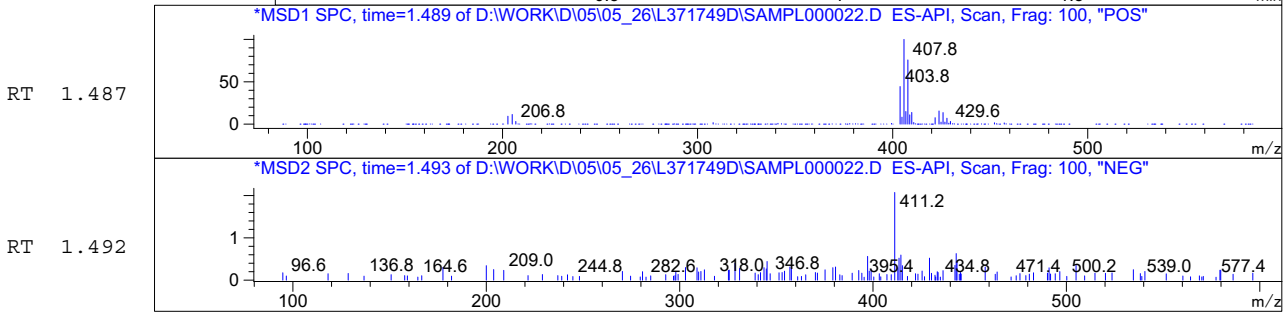



MaxPeak: 98.93%  
Ret\_Time: 1.247 min

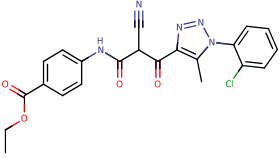

Mol Wt 451.86  
Exact Mass 451.11

| # | Time  | Area% |
|---|-------|-------|
| 1 | 1.030 | 1.07  |
| 2 | 1.247 | 98.93 |

S568083\$4

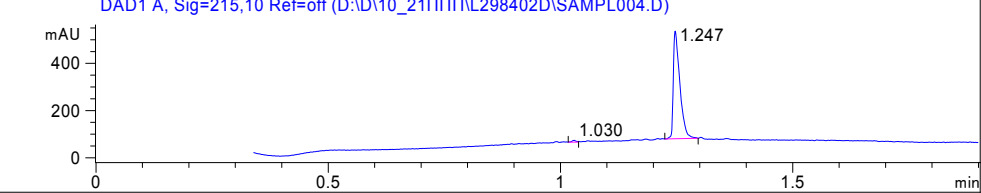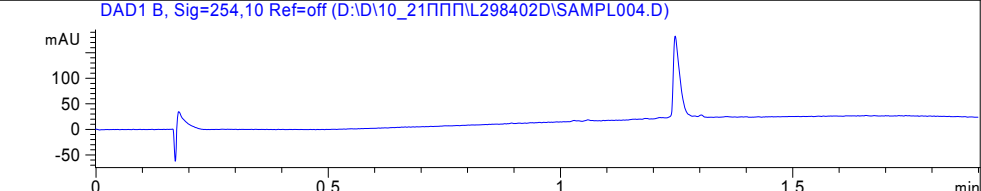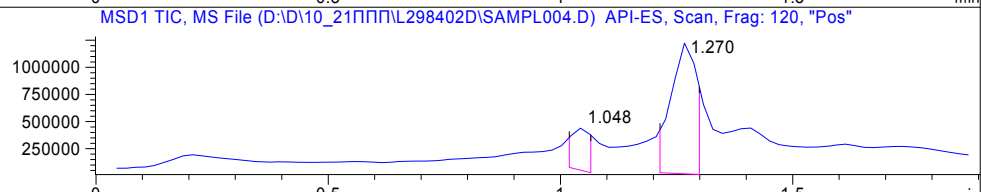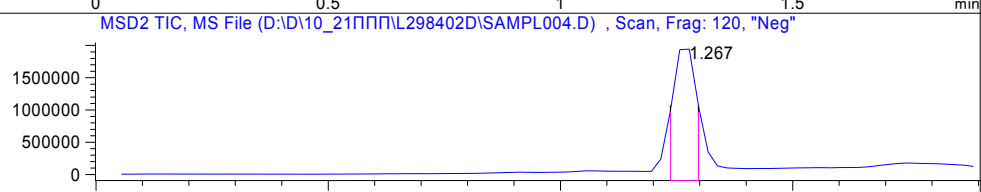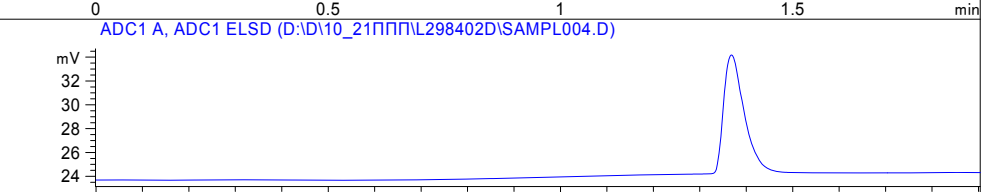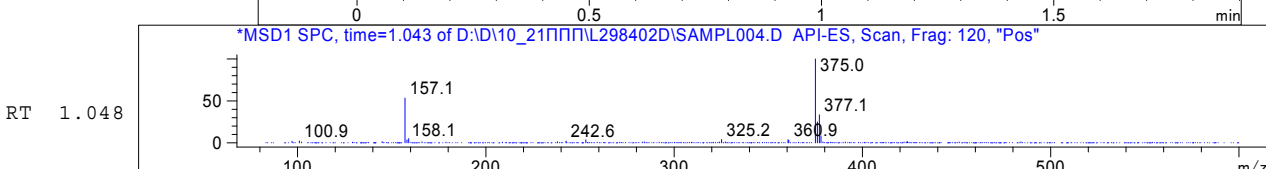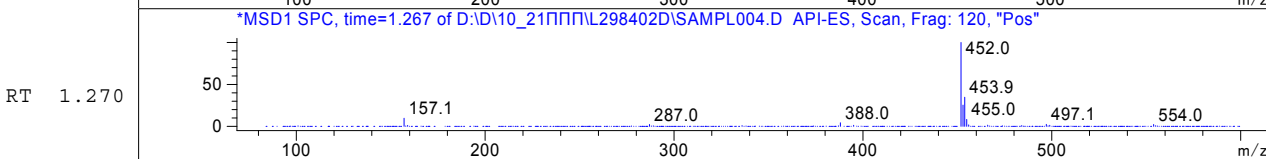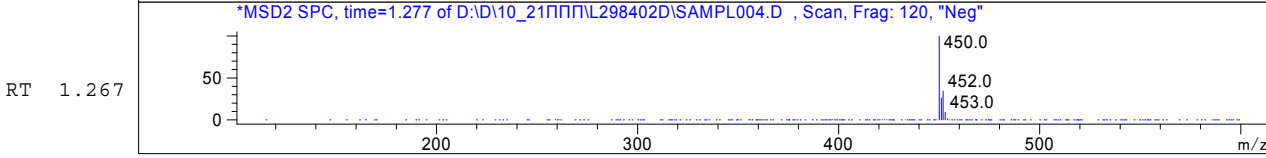

Inj.Date 10/22/2020

N

-VL-

Acq. Method C:\HPCHEM\ -> ->

Z1123372000\_

MaxPeak: 91.40%  
Ret\_Time: 1.332 min

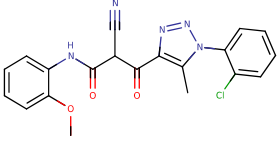

Mol Wt 409.83  
Exact Mass 409.1

| # | Time  | Area% |
|---|-------|-------|
| 1 | 0.913 | 6.77  |
| 2 | 1.221 | 1.83  |
| 3 | 1.332 | 91.40 |

S866357\$B

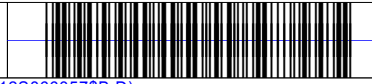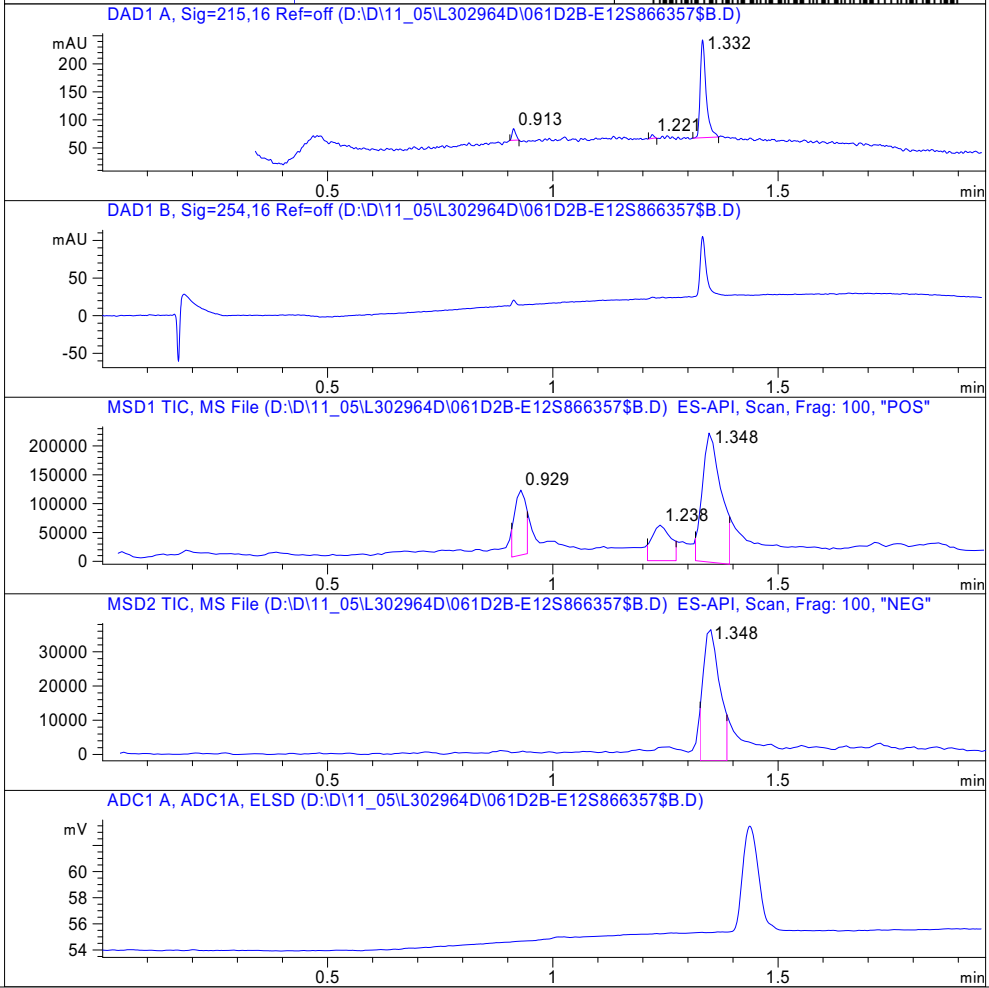

RT 0.929

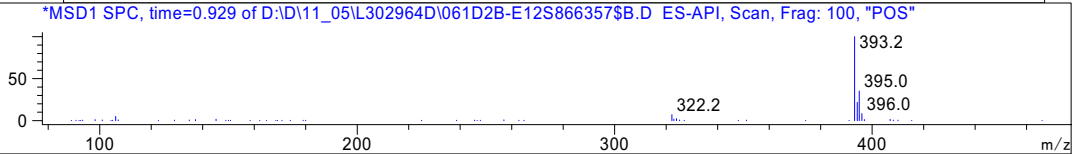

RT 1.238

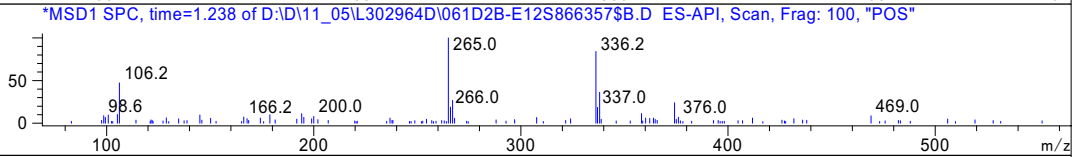

RT 1.348

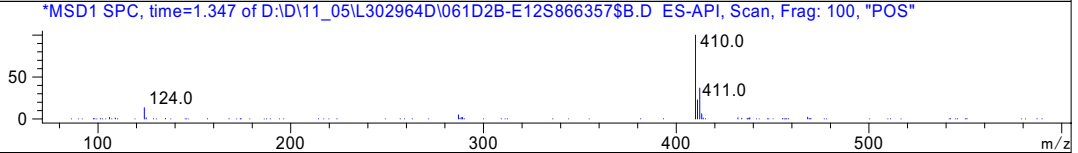

RT 1.348

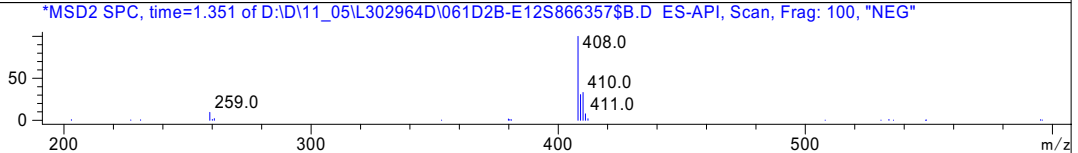

MaxPeak: 100.00%  
Ret\_Time: 1.795 min

S568071\$17

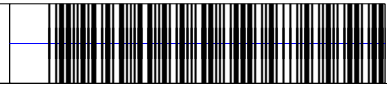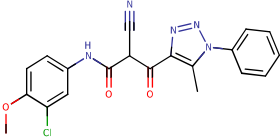

Mol Wt 409.83  
Exact Mass 409.1

| # | Time  | Area%  |
|---|-------|--------|
| 1 | 1.795 | 100.00 |

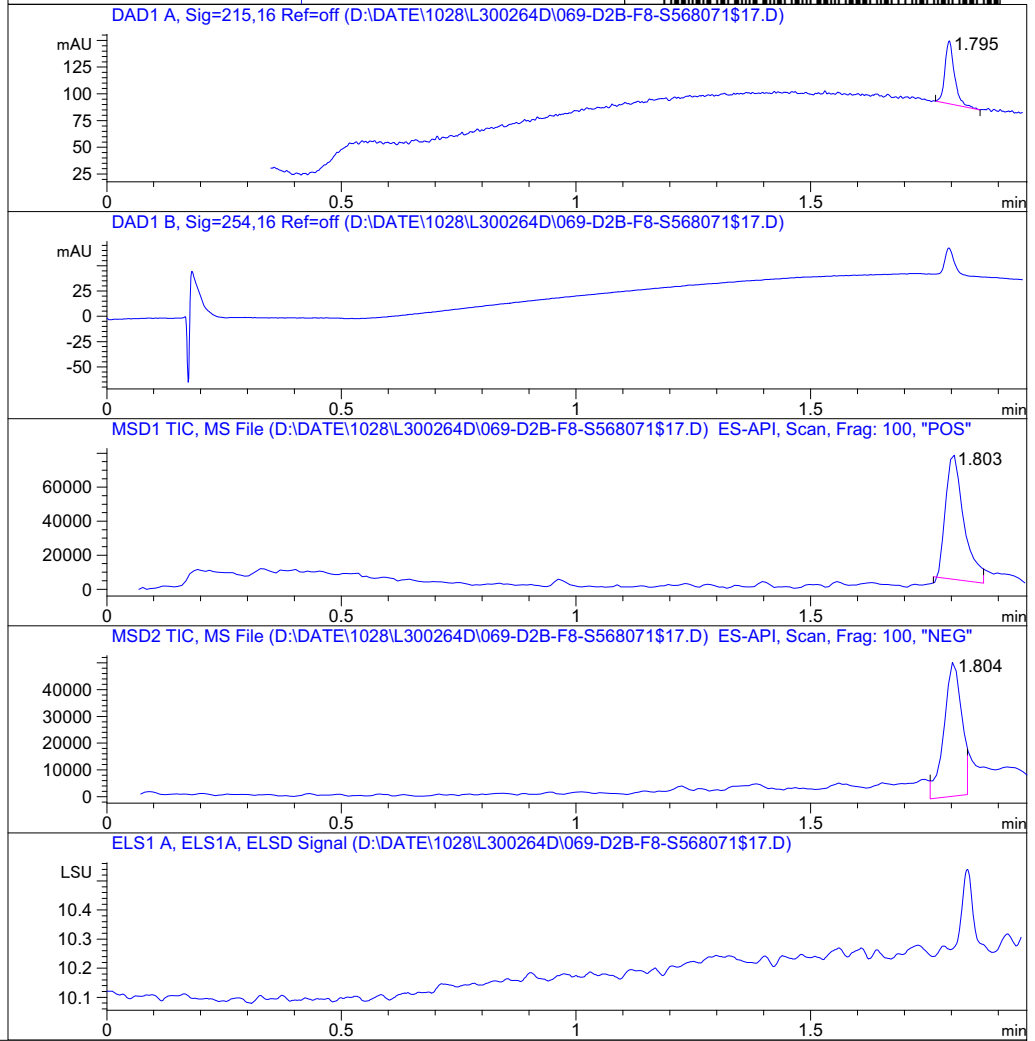

RT 1.803

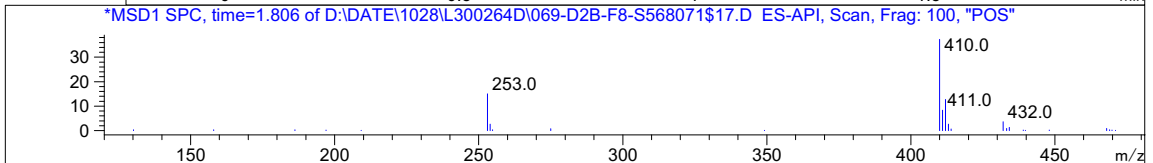

RT 1.804

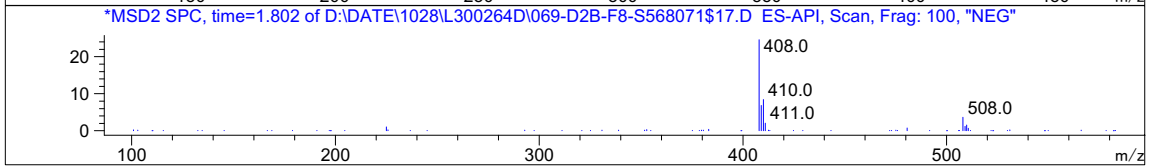

MaxPeak: 95.28%  
Ret\_Time: 1.360 min

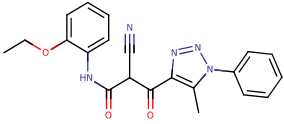

Mol Wt 389.41  
Exact Mass 389.16

| # | Time  | Area% |
|---|-------|-------|
| 1 | 1.360 | 95.28 |
| 2 | 1.380 | 4.72  |

S568078\$C

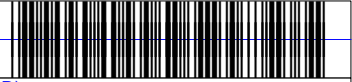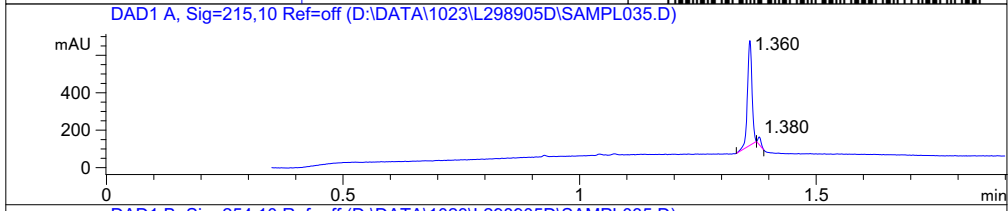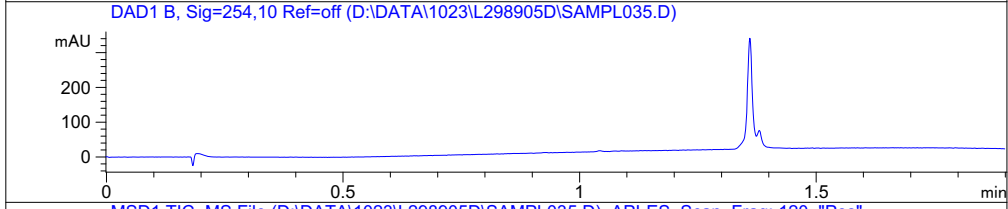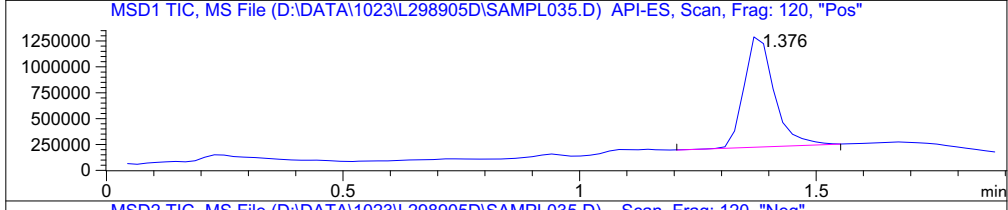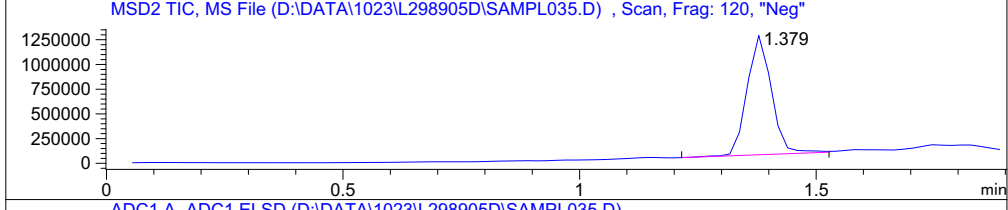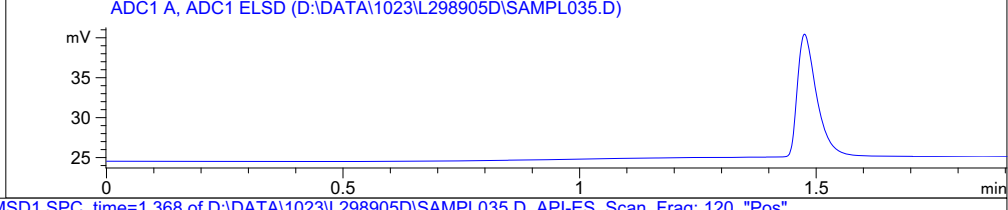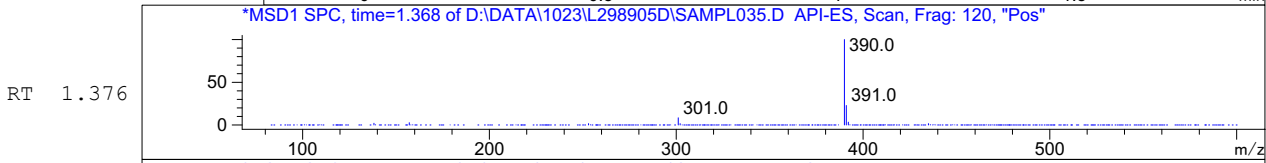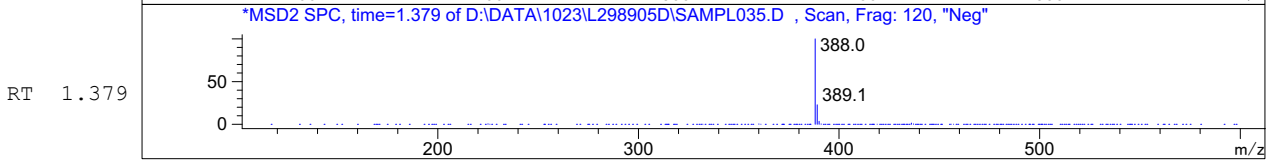

MaxPeak: 100.00%  
Ret\_Time: 1.205 min

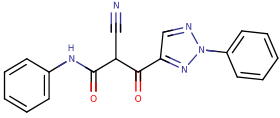

Mol Wt 331.33  
Exact Mass 331.11

| # | Time  | Area%  |
|---|-------|--------|
| 1 | 1.205 | 100.00 |

S993141\$15

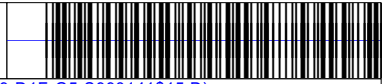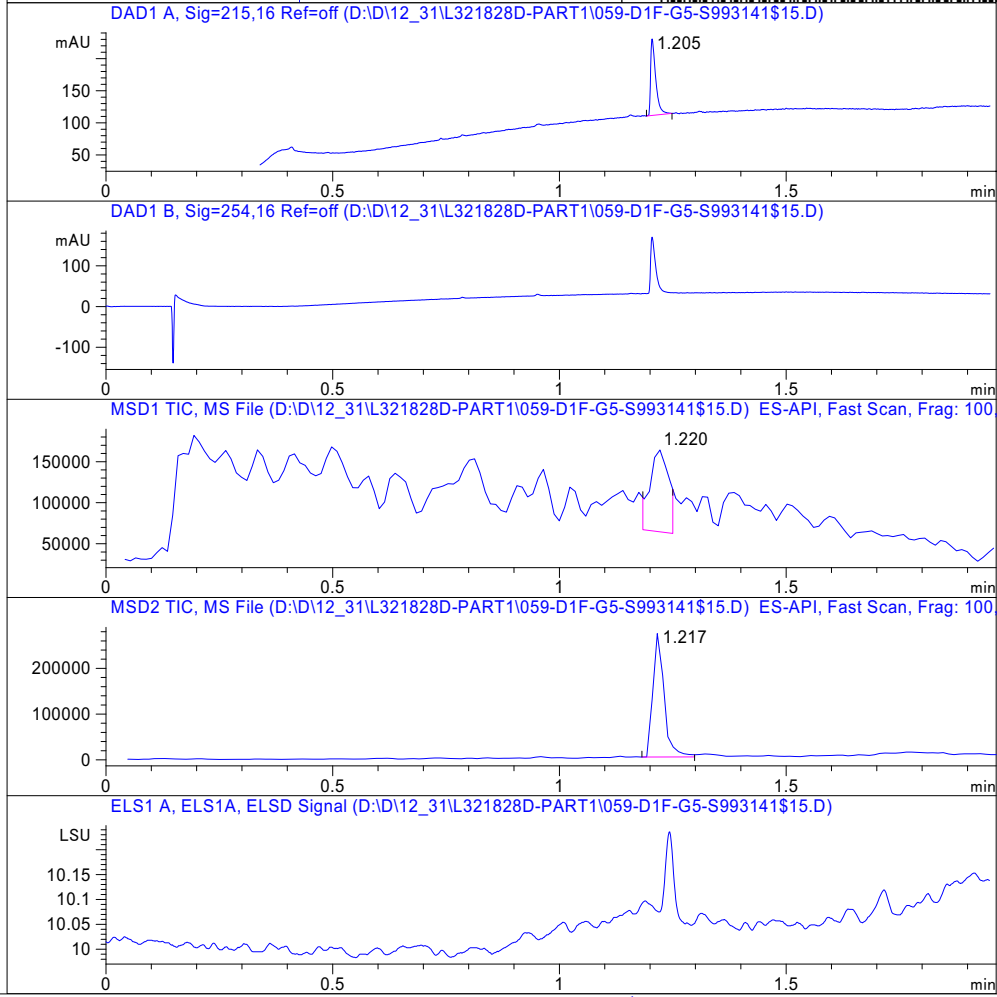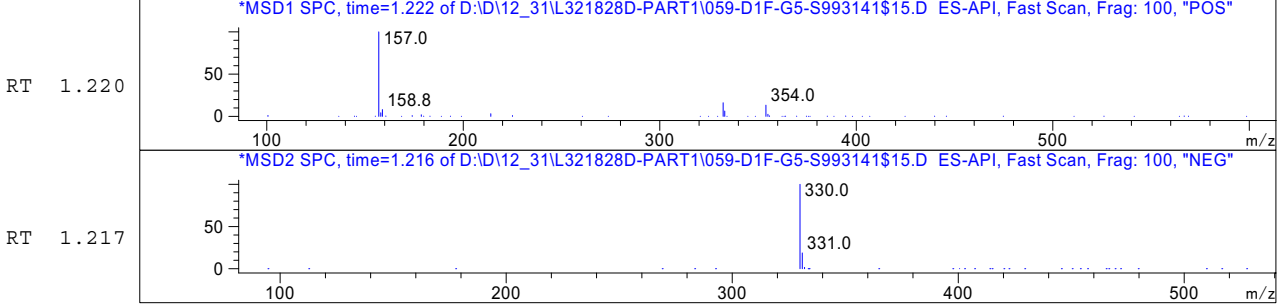

Inj.Date 12/30/2020

N

Acq. Method C:\Users\ -> ->

Z638927484\_

# H3659984

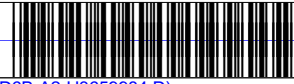

MaxPeak: 100.00%  
Ret\_Time: 2.073 min

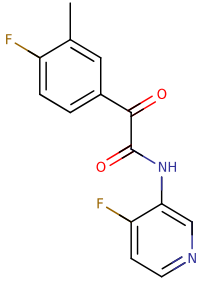

Mol Wt 276.24  
Exact Mass 276.08

| # | Time  | Area%  |
|---|-------|--------|
| 1 | 2.073 | 100.00 |

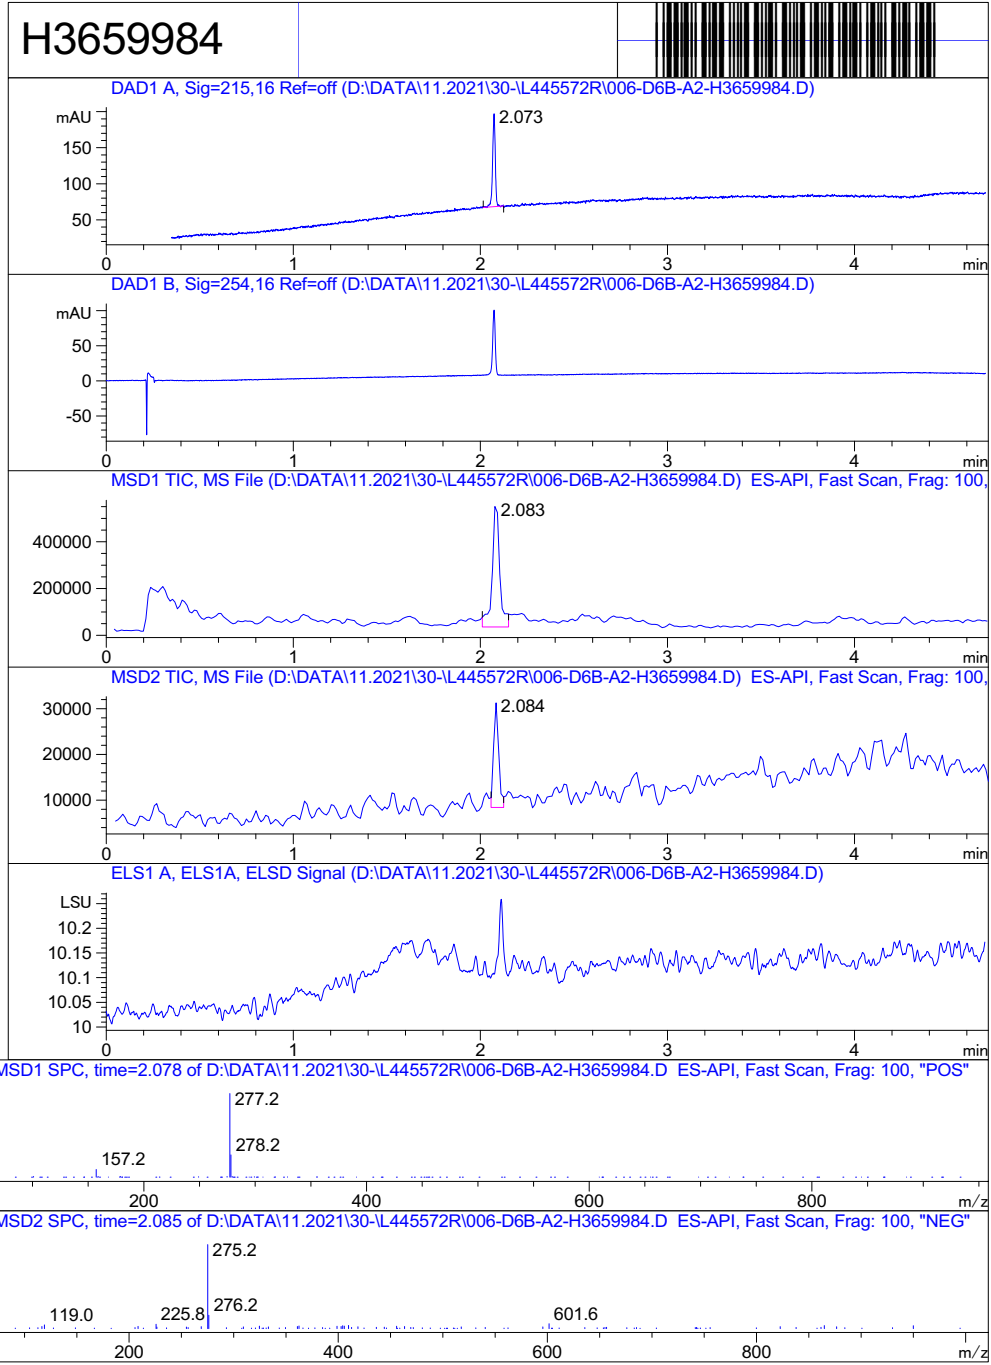

Inj.Date 11/30/2021

CH <invalid>

Acq. Method C:\Users\ -> ->

Z5420738300\_

# W179756\$55

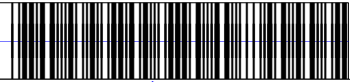

MaxPeak: 98.62%  
Ret\_Time: 1.333 min

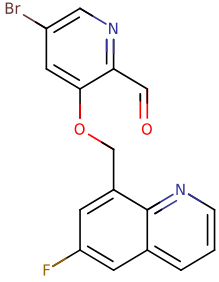

Mol Wt 361.16  
Exact Mass 360

| # | Time  | Area% |
|---|-------|-------|
| 1 | 1.197 | 1.38  |
| 2 | 1.333 | 98.62 |

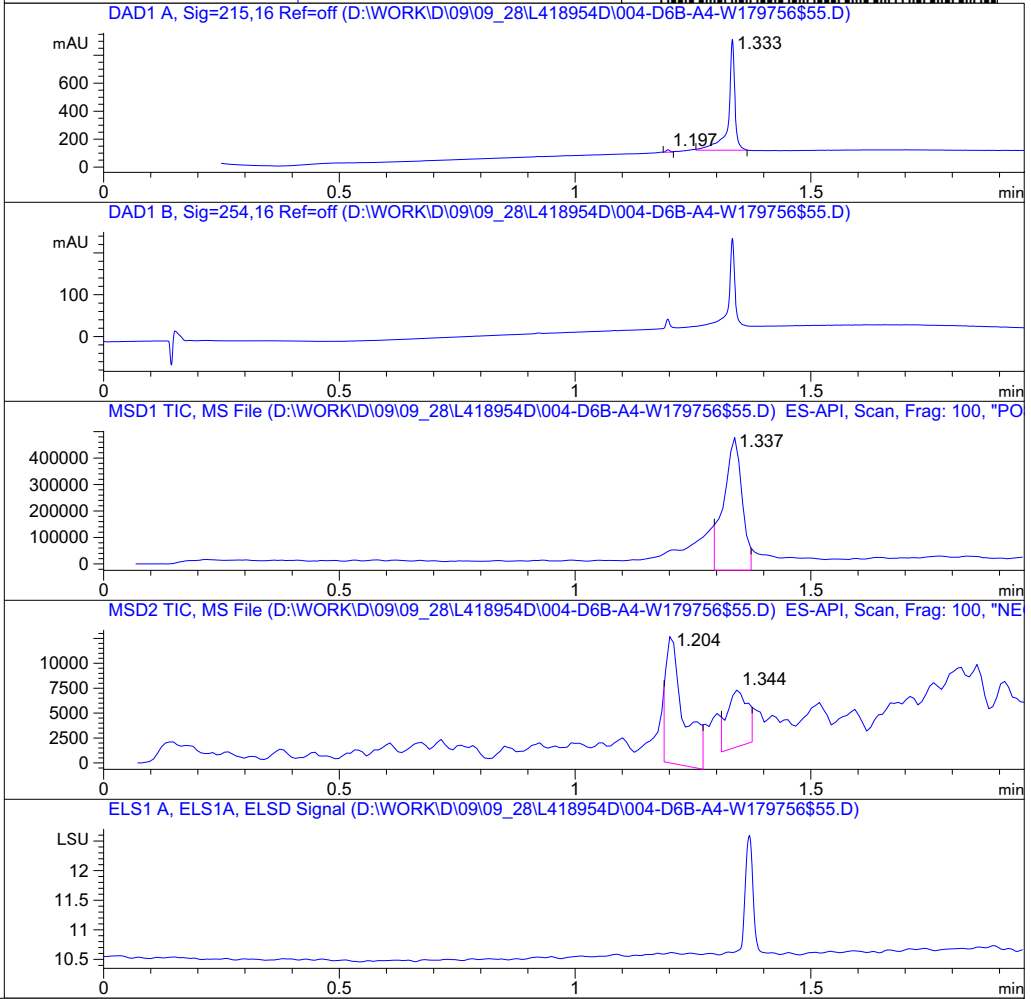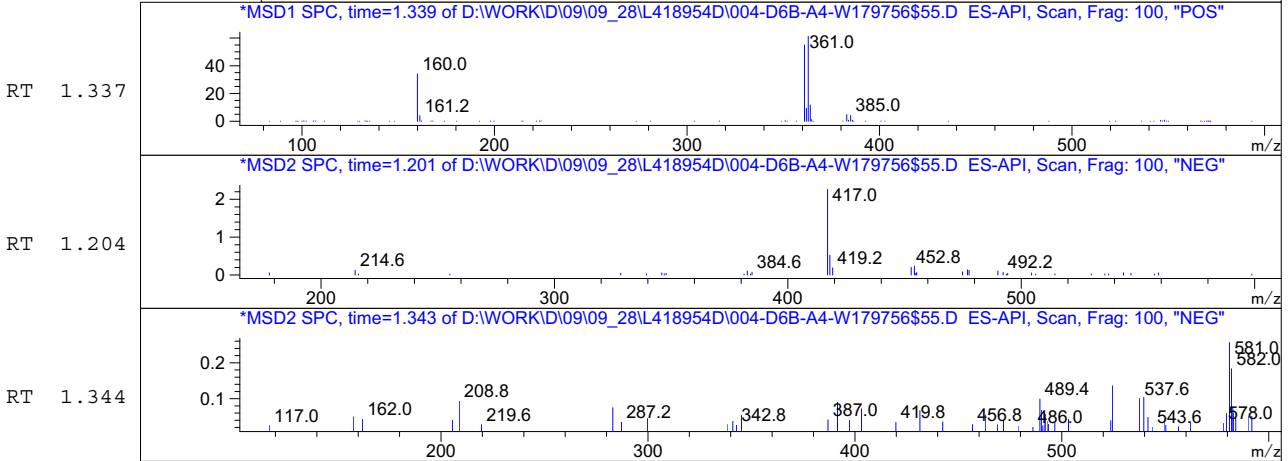

Inj.Date 9/28/2021

K

<invalid> -15-

Acq. Method C:\Chem32\--> -->

Z5192779144\_

Library Search Report

Data Path : D:\MassHunter\GCMS\1\data\09\_22\  
Data File : R2726874.D  
Acq On : 22 Sep 2021 15:10  
Operator :  
Sample : R2726874  
Misc : CH3CN  
ALS Vial : 77 Sample Multiplier: 1

Search Libraries: C:\Database\EMPTY.L Minimum Quality: 0

Unknown Spectrum: Apex  
Integration Events: ChemStation Integrator - autoint1.e

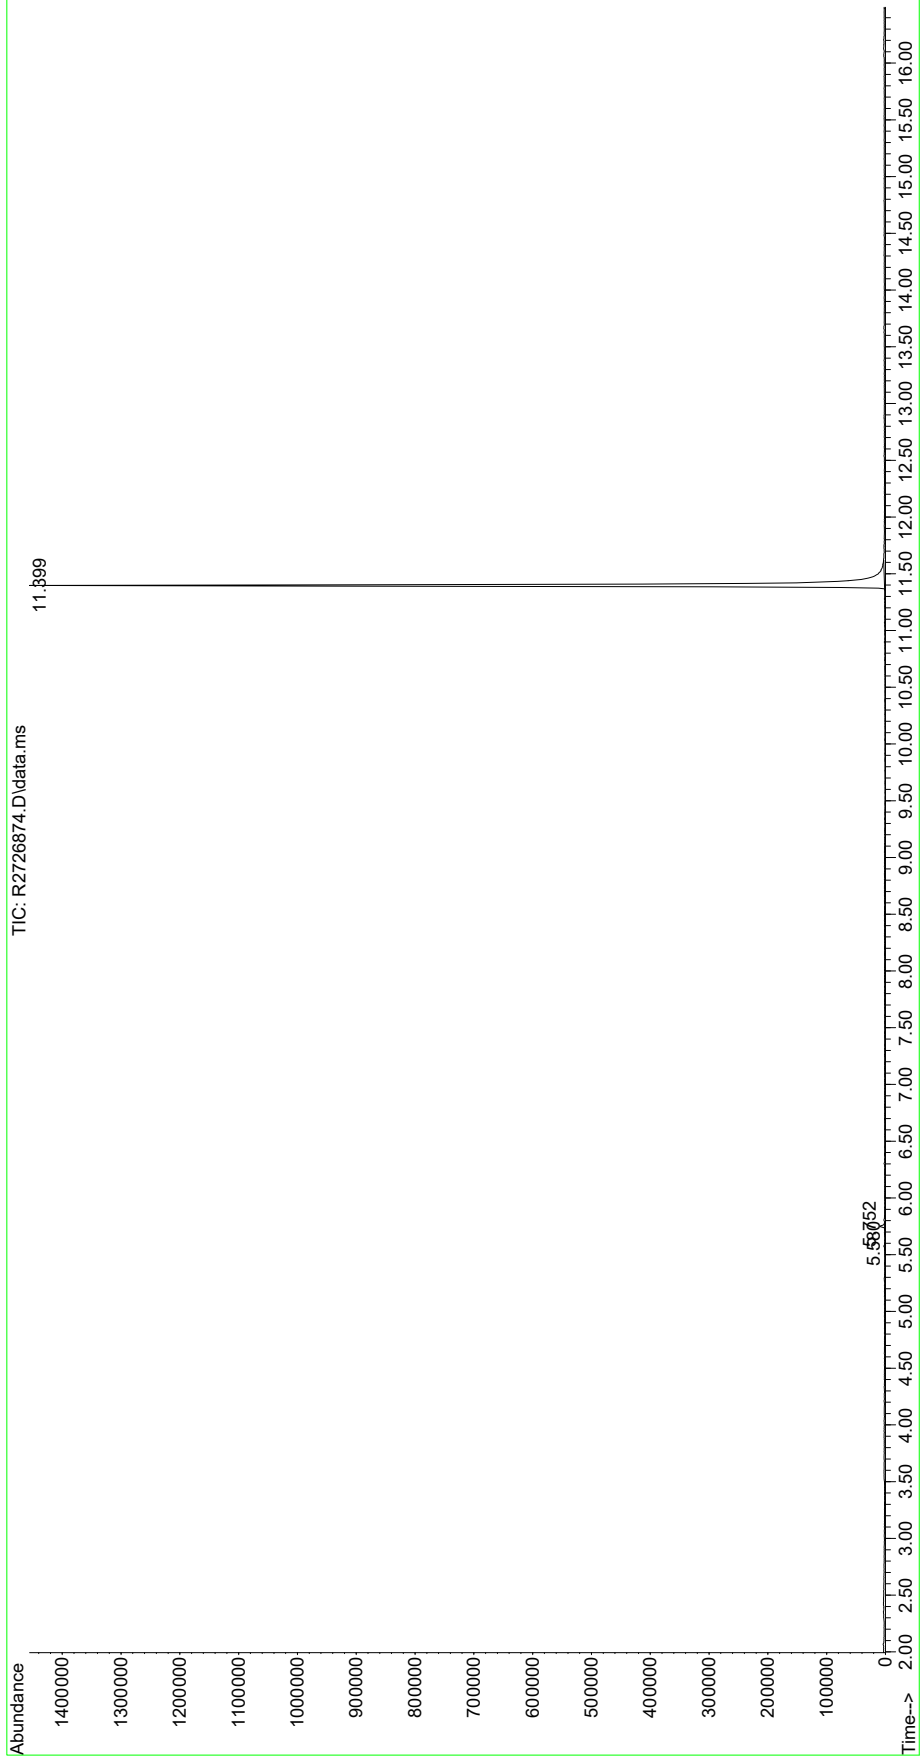



MaxPeak: 100.00%  
Ret\_Time: 1.568 min

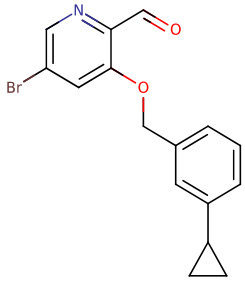

Mol Wt 332.19  
Exact Mass 331.04

| # | Time  | Area%  |
|---|-------|--------|
| 1 | 1.568 | 100.00 |

V211811\$A

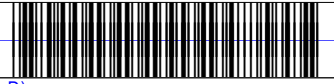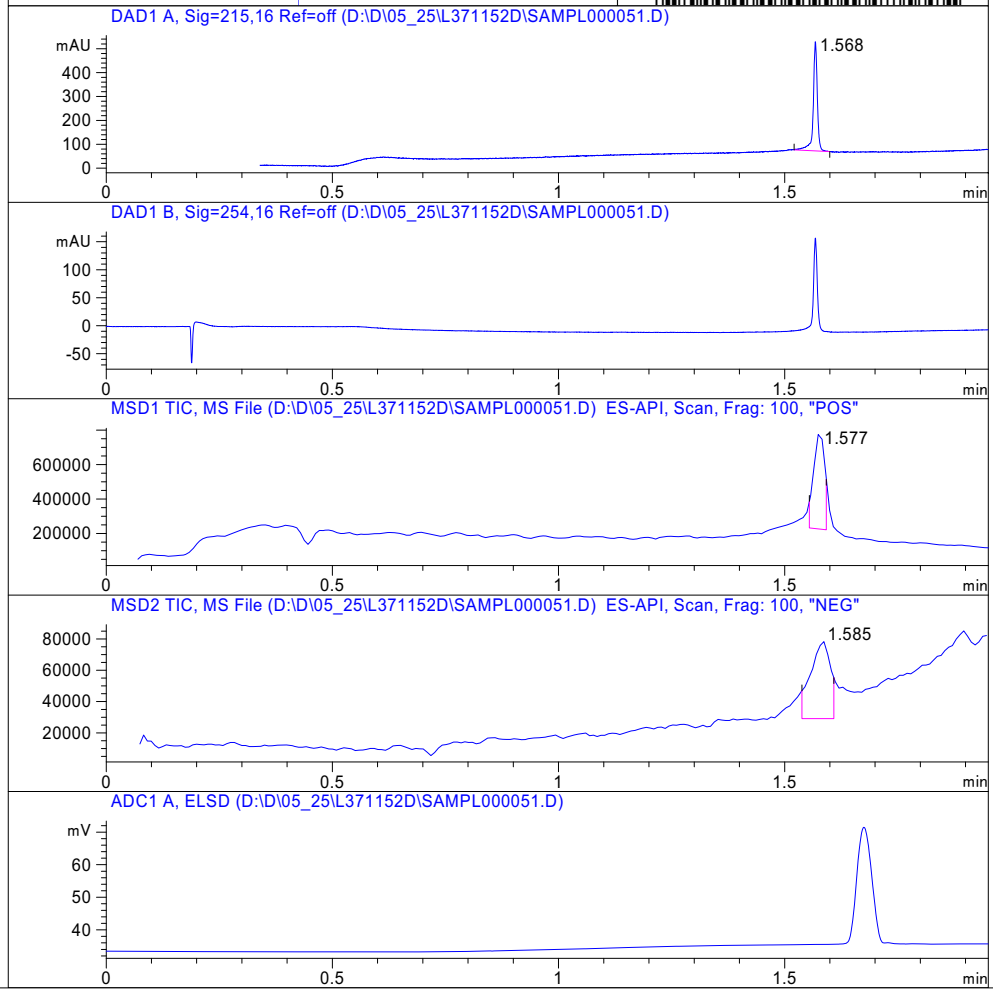

RT 1.577

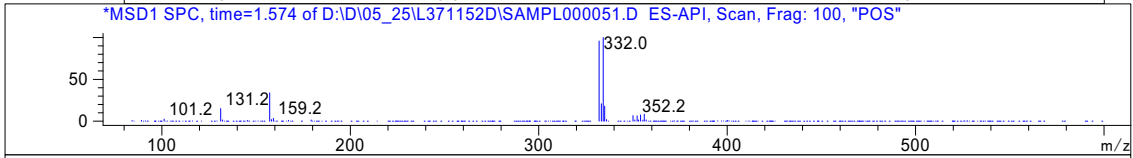

RT 1.585

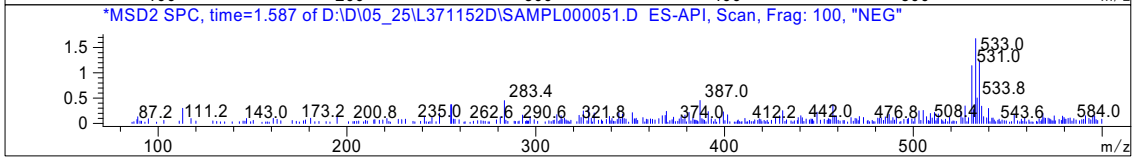

Inj.Date 5/23/2021

N

-5-

Acq. Method C:\CHEM32\--> -->

Z4989203264\_

MaxPeak: 100.00%  
Ret\_Time: 1.615 min

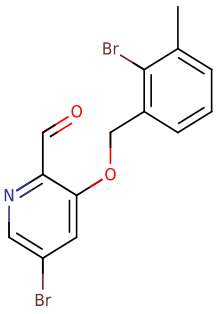

Mol Wt 385.05  
Exact Mass 384.93

| # | Time  | Area%  |
|---|-------|--------|
| 1 | 1.615 | 100.00 |

V211809\$3

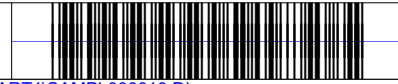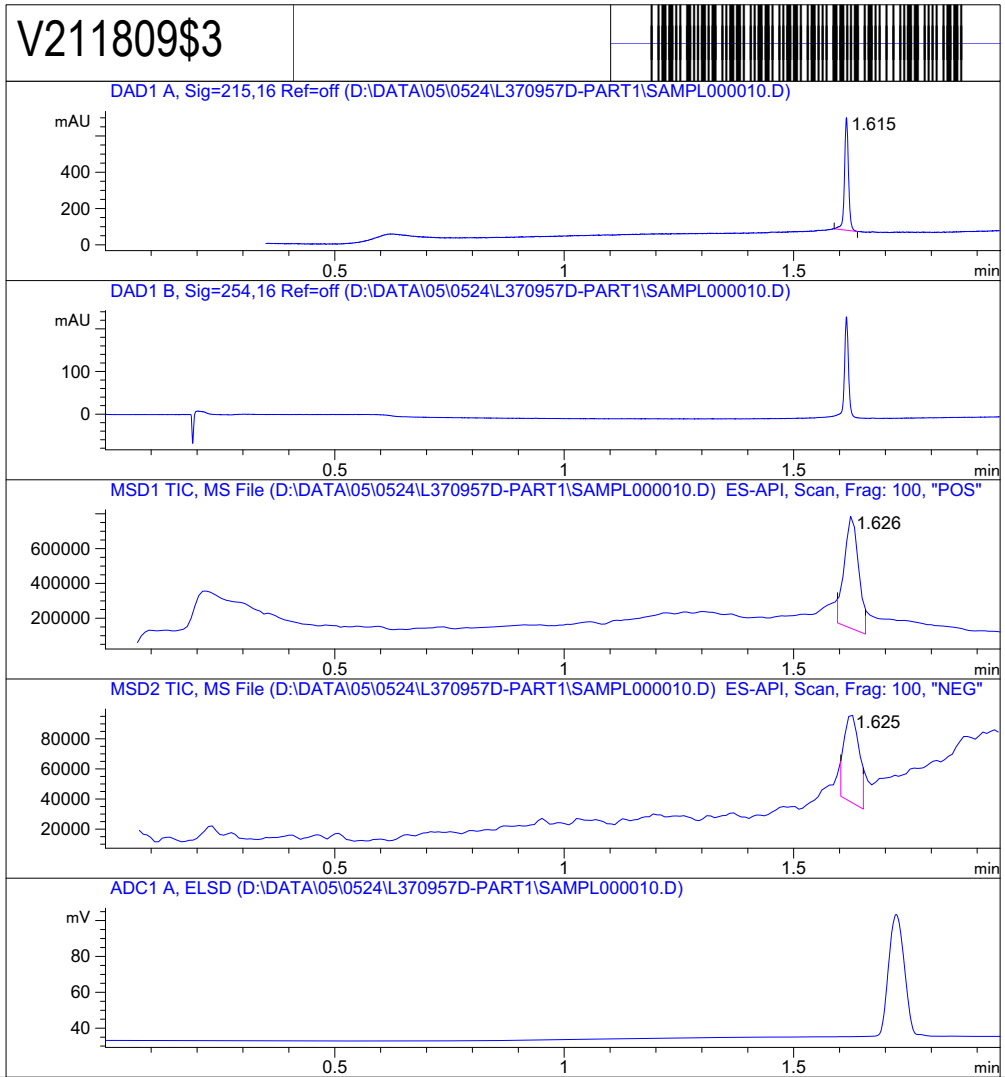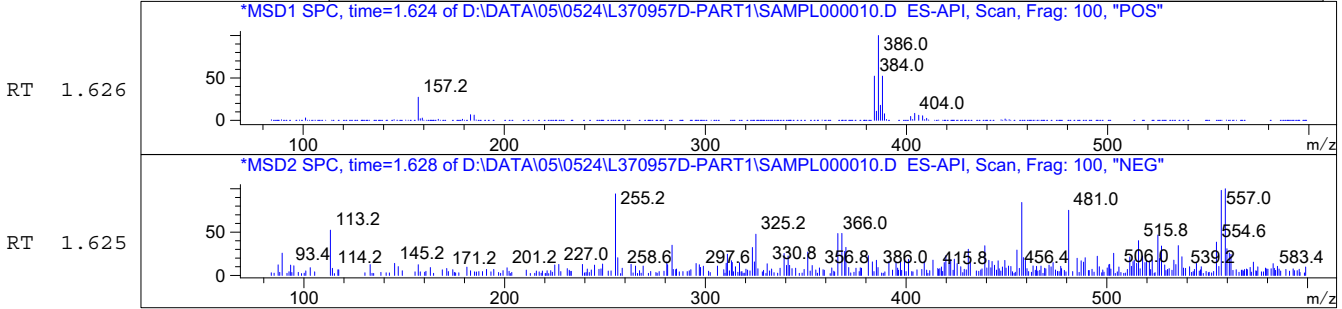

MaxPeak: 100.00%  
Ret\_Time: 1.295 min

V296342\$4

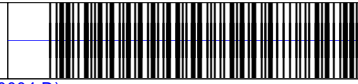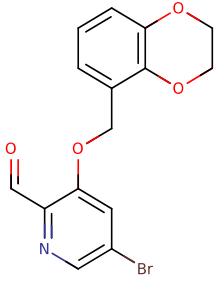

Mol Wt 350.16  
Exact Mass 349

| # | Time  | Area%  |
|---|-------|--------|
| 1 | 1.295 | 100.00 |

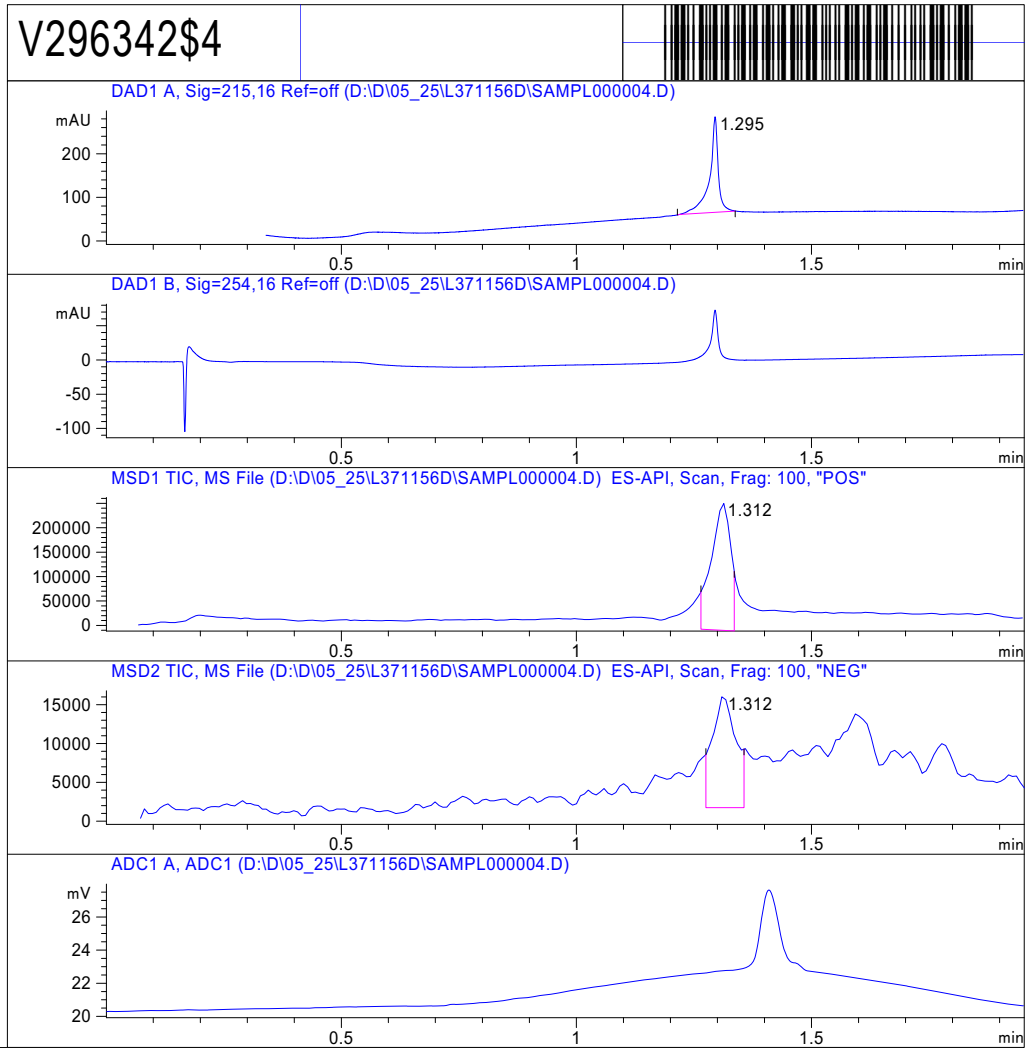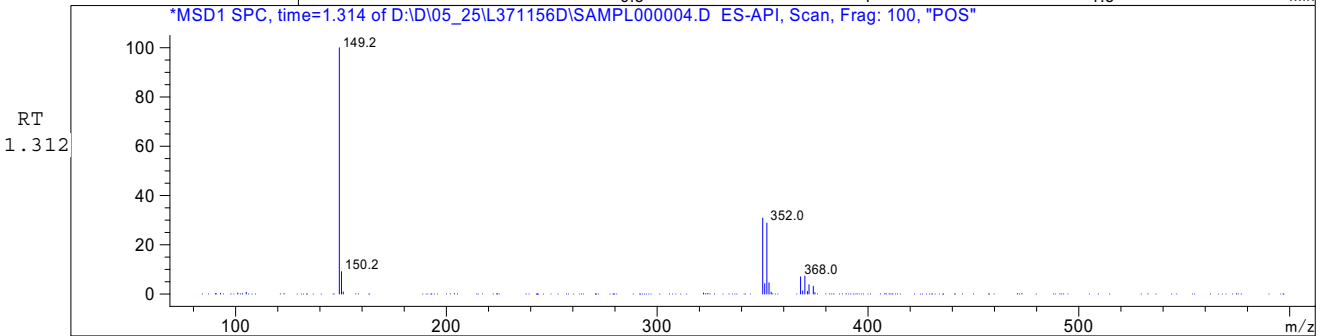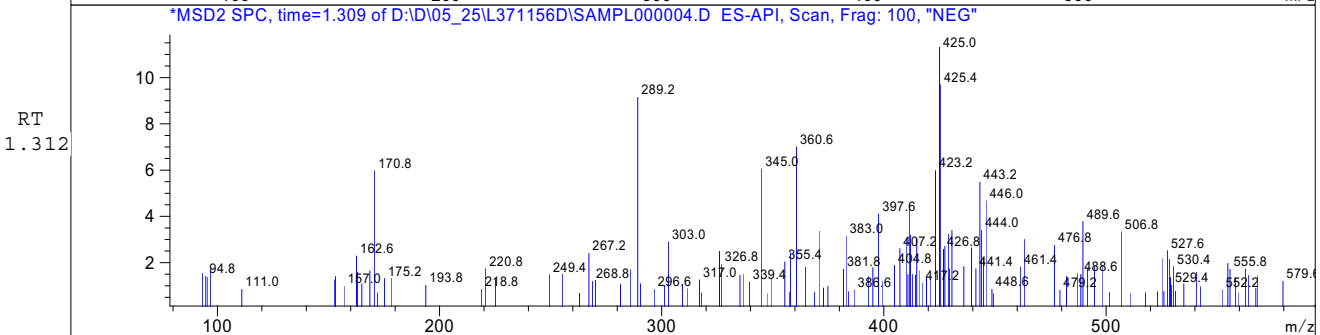

V296341\$6

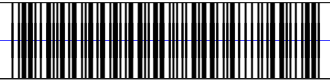

MaxPeak: 99.47%  
Ret\_Time: 2.993 min

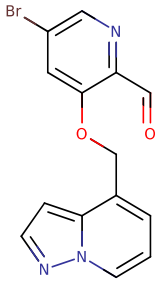

Mol Wt 332.15  
Exact Mass 331

| # | Time  | Area% |
|---|-------|-------|
| 1 | 2.993 | 99.47 |
| 2 | 3.249 | 0.53  |

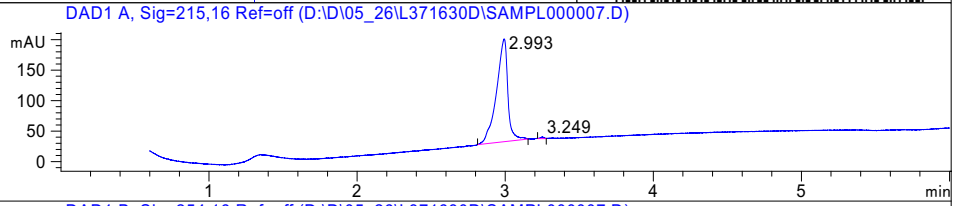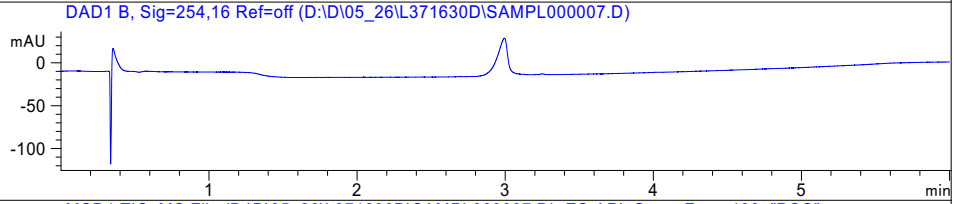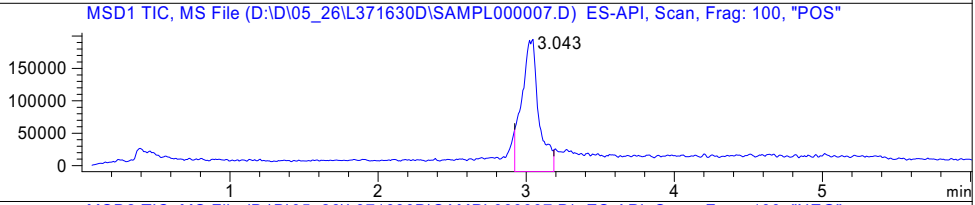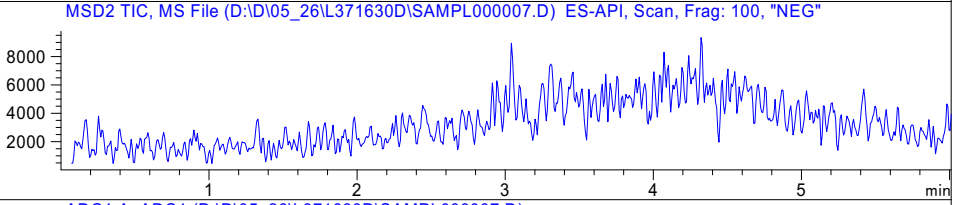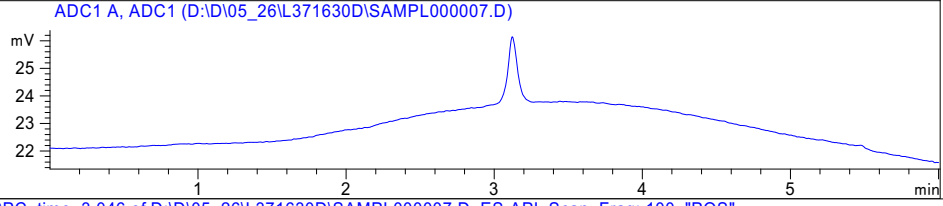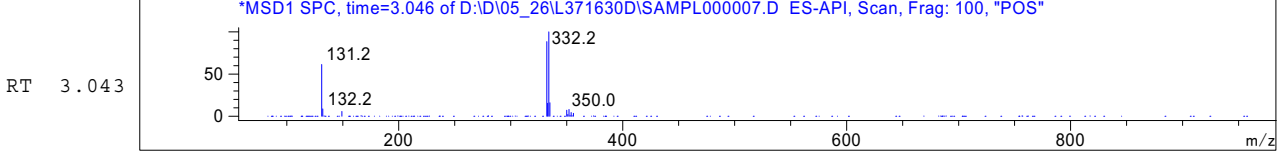

RT 3.043

Library Search Report

Data Path : D:\MassHunter\GCMS\1\data\09\_09\  
Data File : R2714707.D  
Acq On : 09 Sep 2021 17:49  
Operator :  
Sample : R2714707  
Misc : CH3CN  
ALS Vial : 126 Sample Multiplier: 1

Search Libraries: C:\Database\EMPTY.L Minimum Quality: 0

Unknown Spectrum: Apex  
Integration Events: ChemStation Integrator - autoint1.e

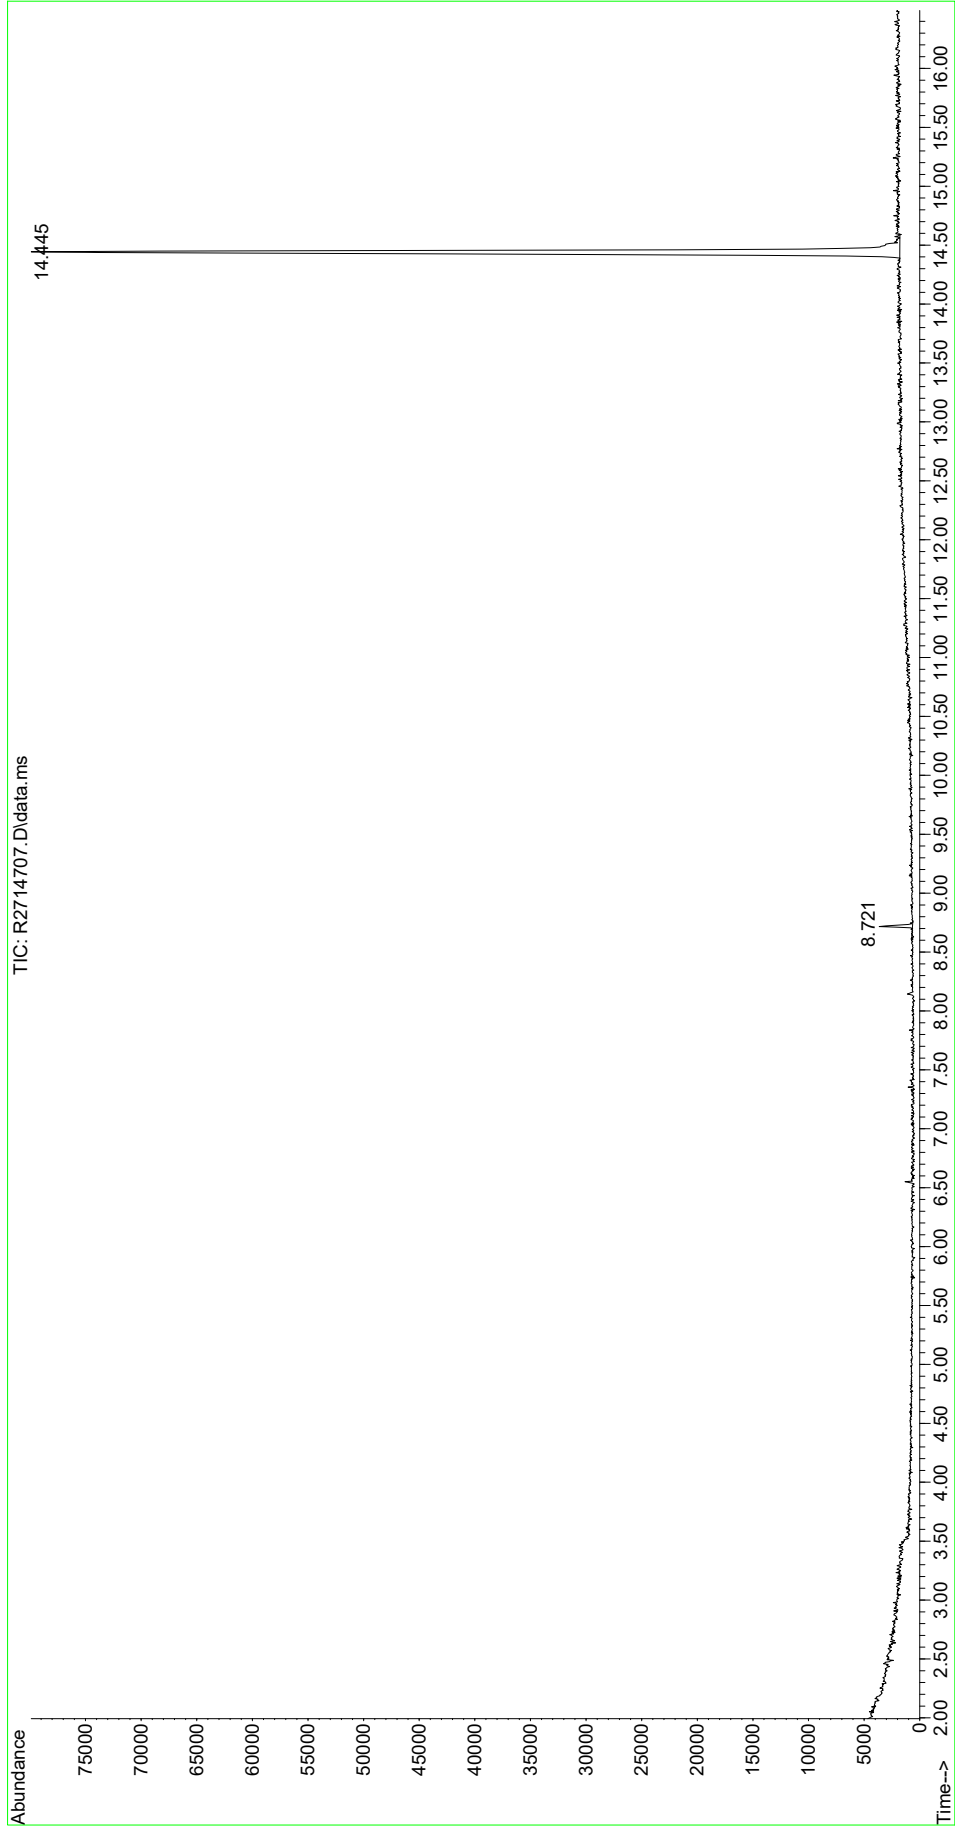

Z4954569231\_

# R2539922

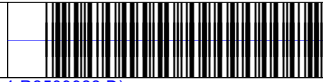

MaxPeak: 91.30%  
Ret\_Time: 0.860 min

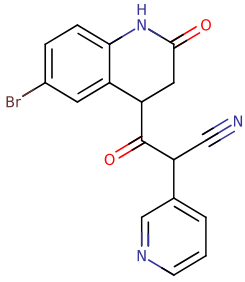

Mol Wt 370.2  
Exact Mass 369.02

| # | Time  | Area% |
|---|-------|-------|
| 1 | 0.765 | 3.46  |
| 2 | 0.834 | 5.24  |
| 3 | 0.860 | 91.30 |

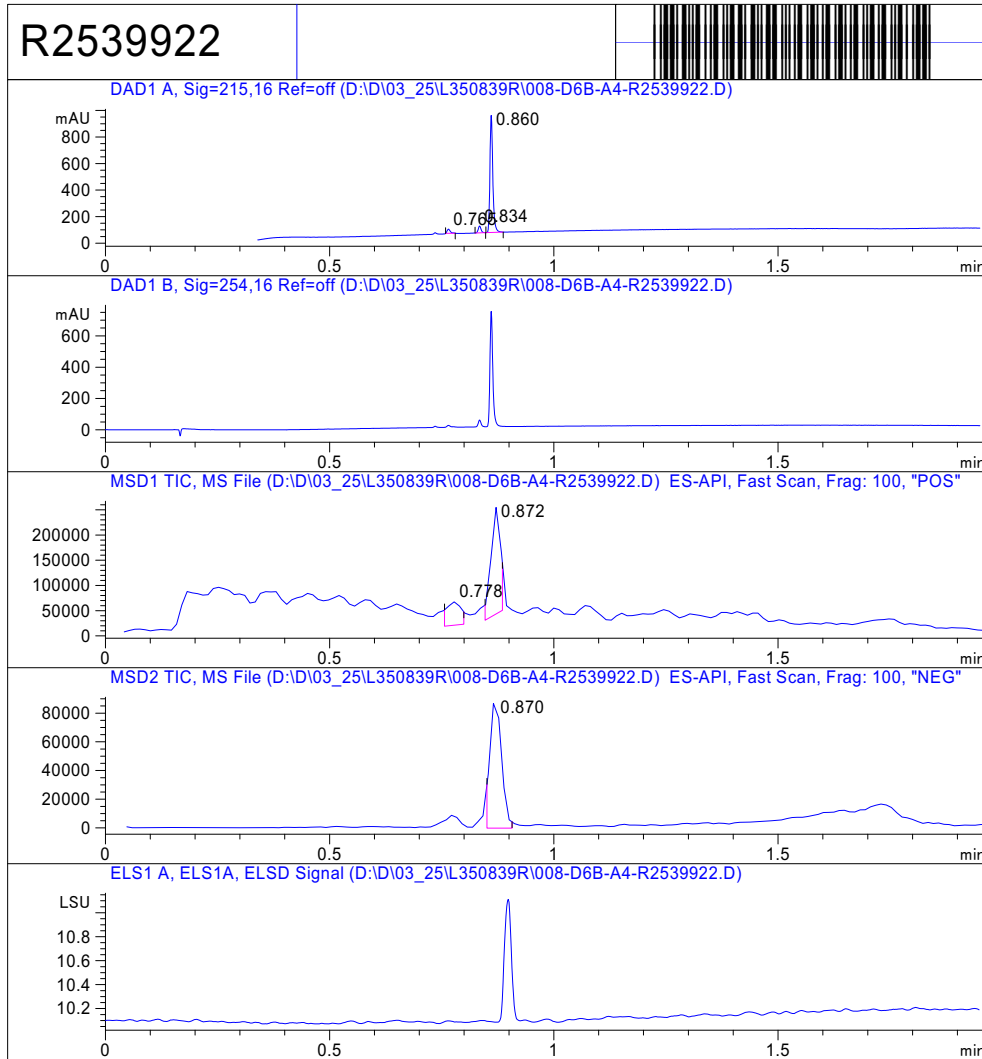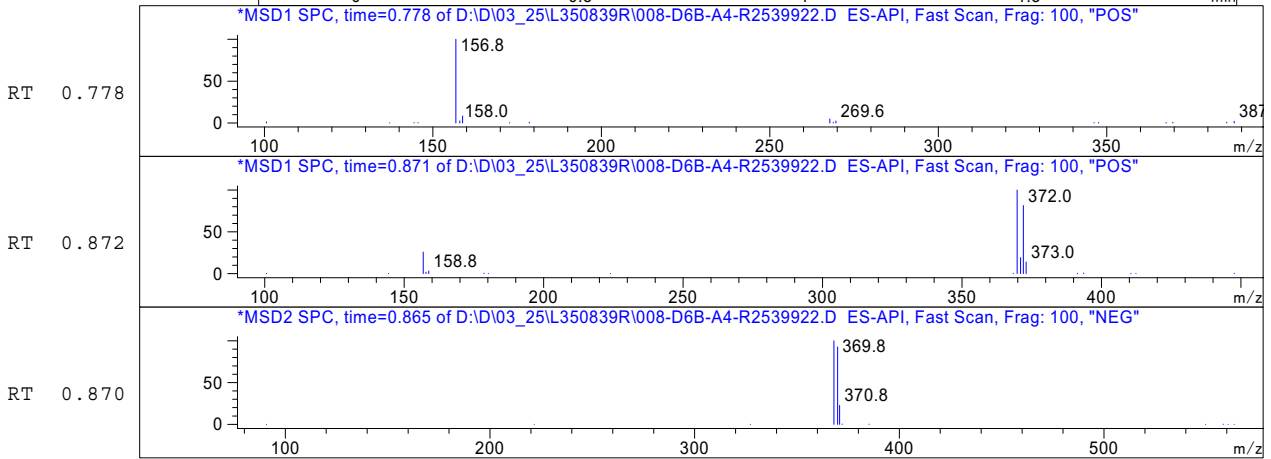

Inj.Date 3/25/2021

N

Acq. Method C:\Users\ -> ->

Z4934489646\_

MaxPeak: 100.00%  
Ret\_Time: 1.211 min

U853195\$2

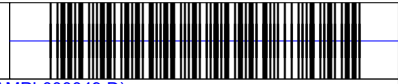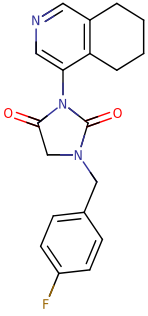

Mol Wt 339.36  
Exact Mass 339.16

| # | Time  | Area%  |
|---|-------|--------|
| 1 | 1.211 | 100.00 |

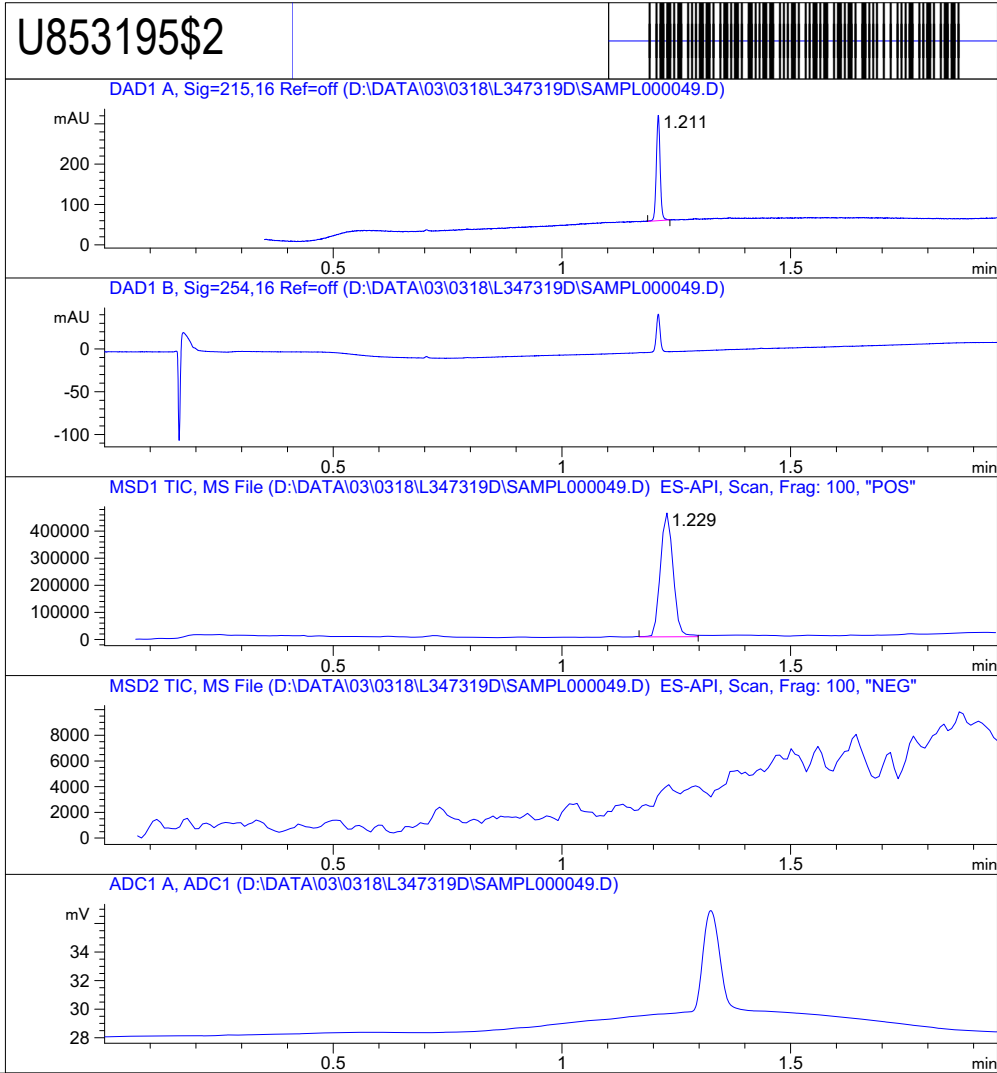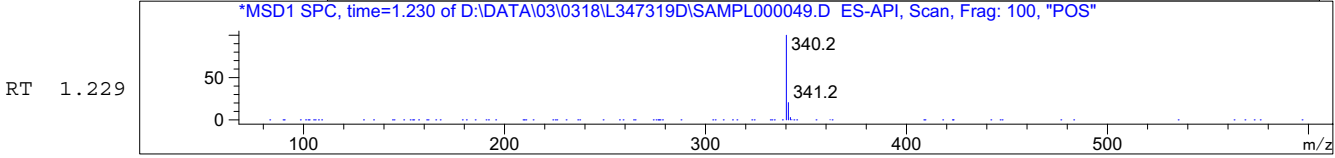

RT 1.229

MaxPeak: 97.64%  
Ret\_Time: 1.055 min

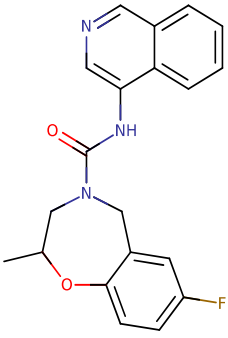

Mol Wt 351.37  
Exact Mass 351.16

| # | Time  | Area% |
|---|-------|-------|
| 1 | 1.033 | 2.36  |
| 2 | 1.055 | 97.64 |

V218888\$1

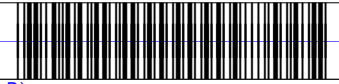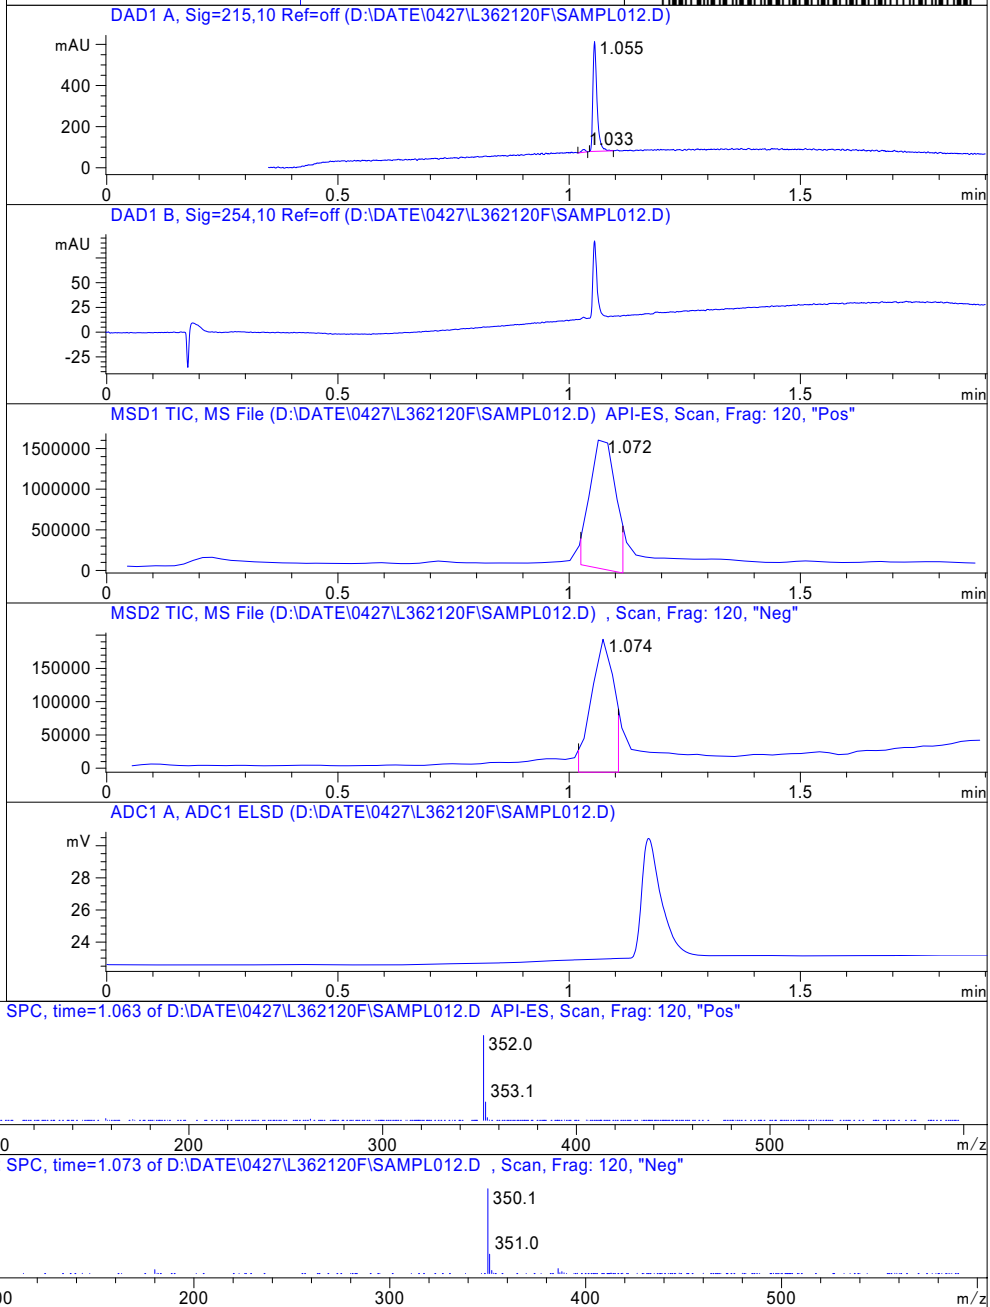



MaxPeak: 90.44%  
Ret\_Time: 1.579 min

Q763569\$4

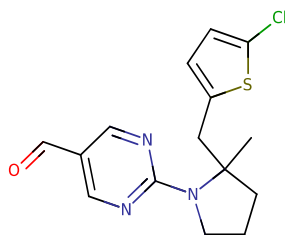

Mol Wt 321.82  
Exact Mass 321.09

| # | Time  | Area% |
|---|-------|-------|
| 1 | 1.311 | 9.56  |
| 2 | 1.579 | 90.44 |

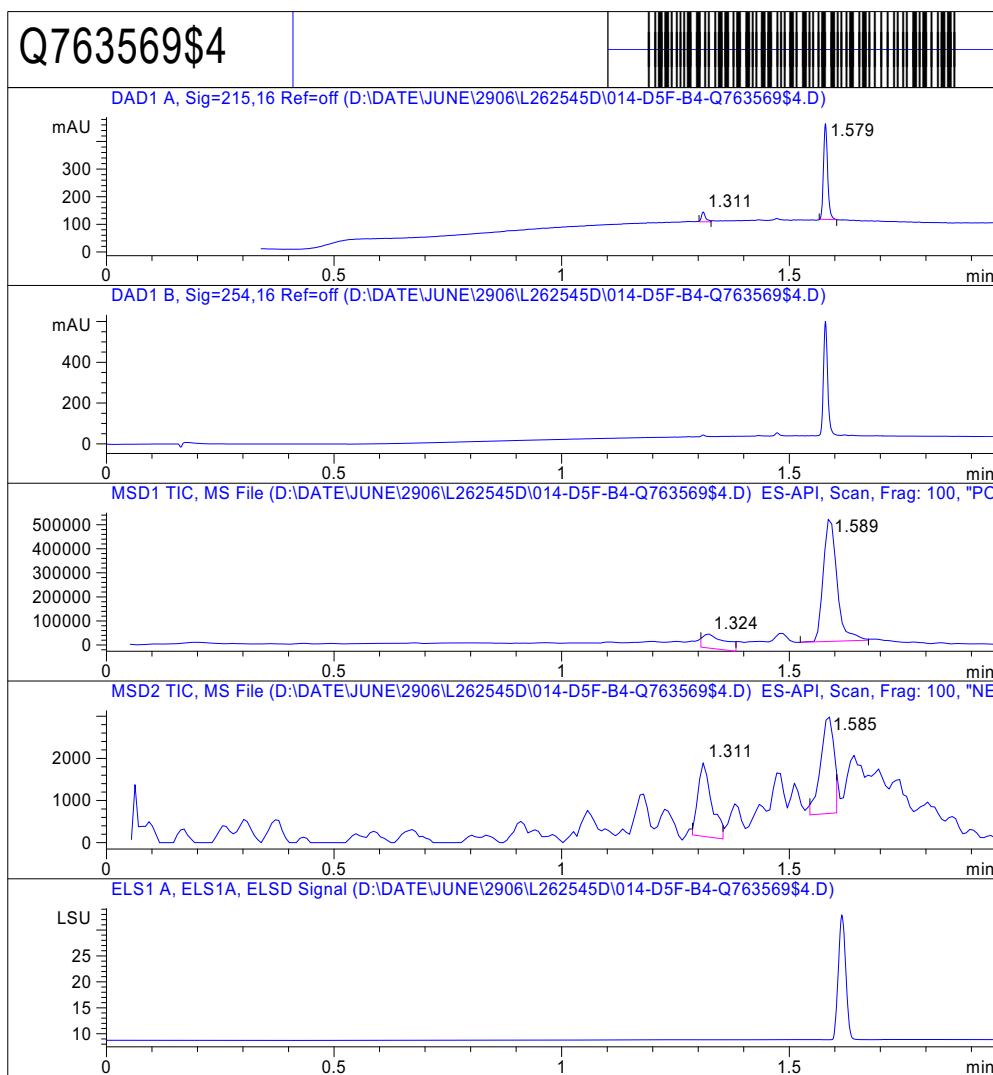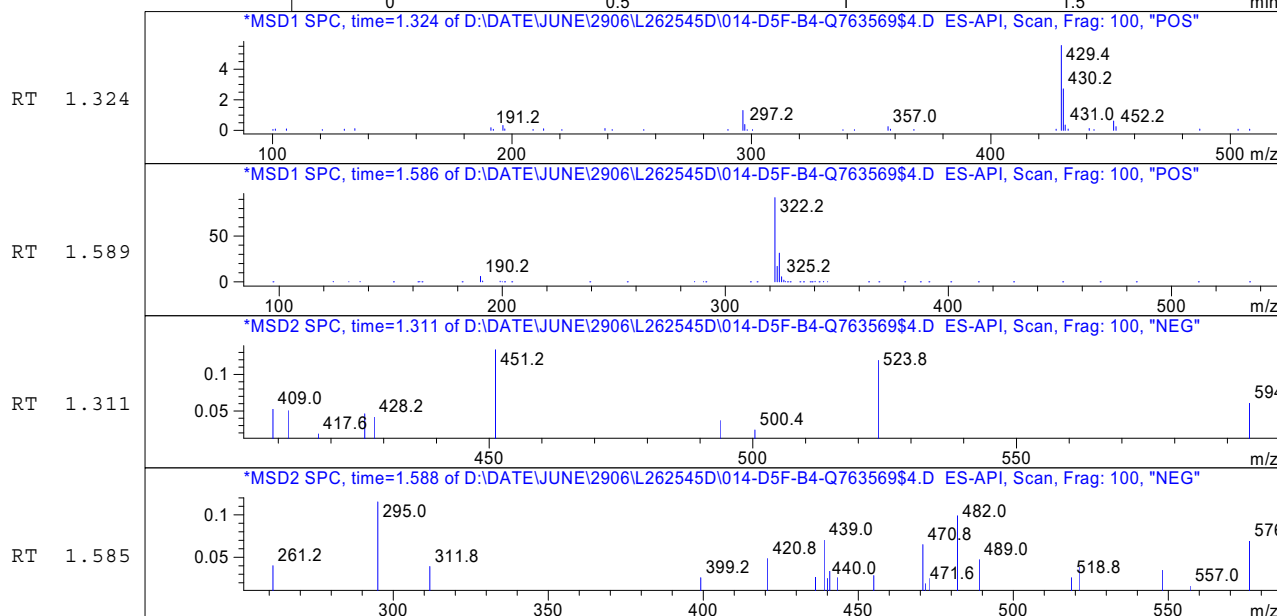

S993128\$9

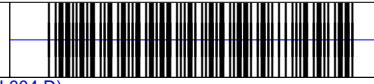

MaxPeak: 100.00%  
Ret\_Time: 1.350 min

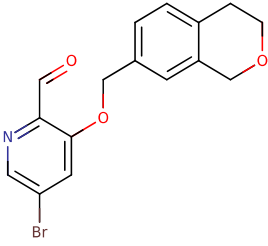

Mol Wt 348.19  
Exact Mass 347.03

| # | Time  | Area%  |
|---|-------|--------|
| 1 | 1.350 | 100.00 |

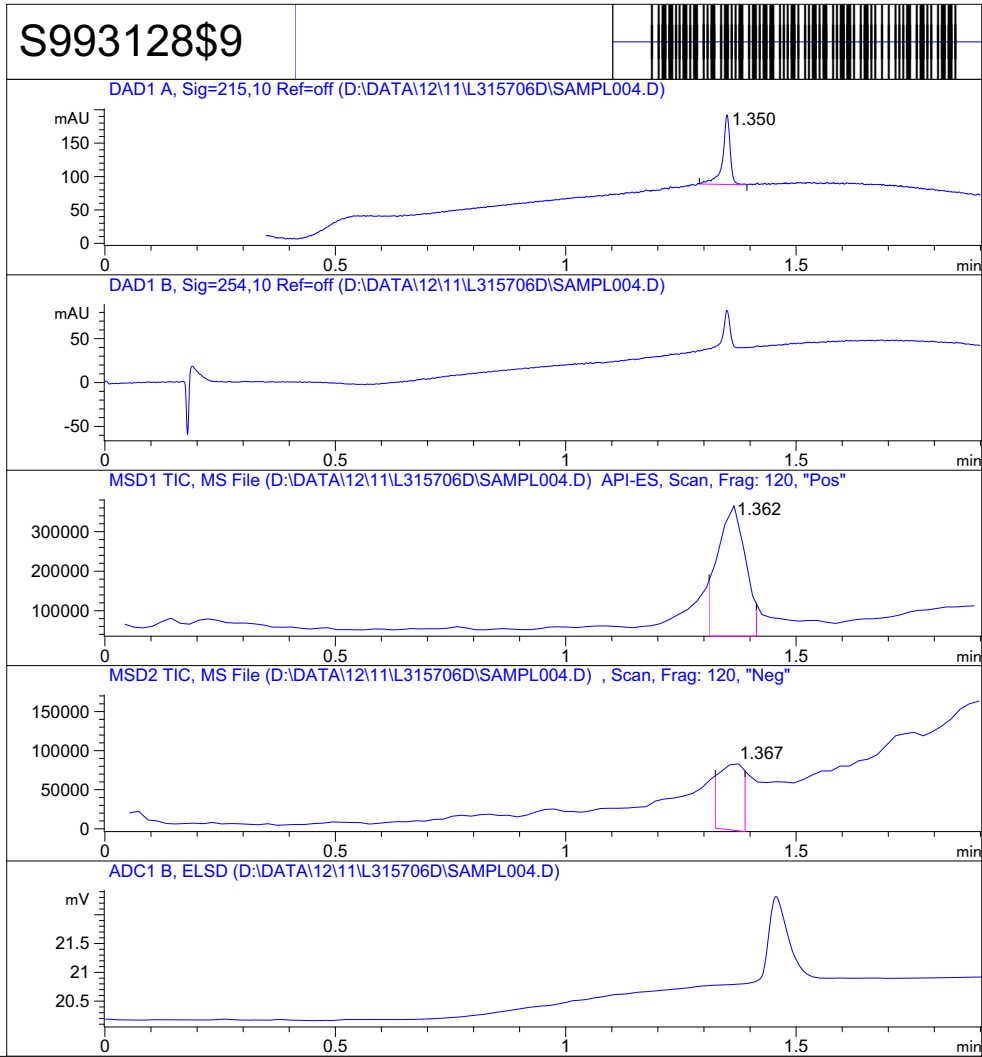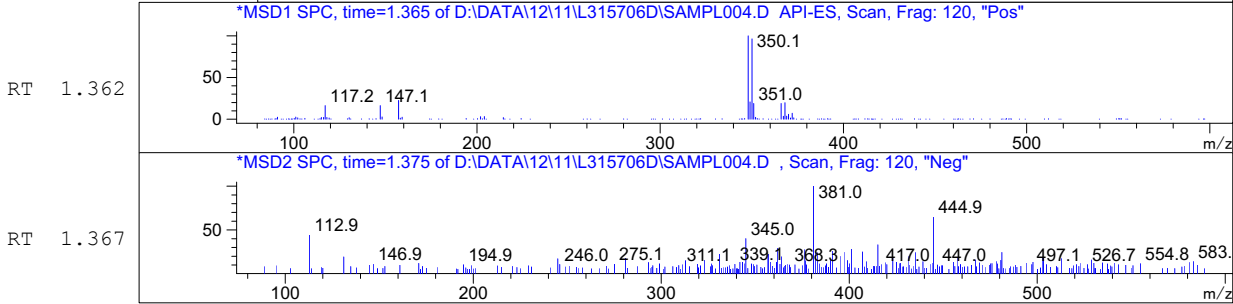

Inj.Date 12/11/2020

LB

-SL-

Acq. Method C:\HPCHEM\ -> ->

Z3339728474\_

MaxPeak: 100.00%  
Ret\_Time: 1.516 min

# Q763545\$1

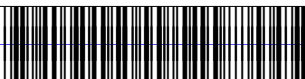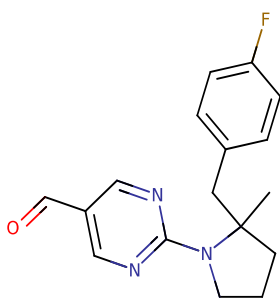

**Mol Wt** 299.34  
**Exact Mass** 299.17

| # | Time  | Area%  |
|---|-------|--------|
| 1 | 1.516 | 100.00 |

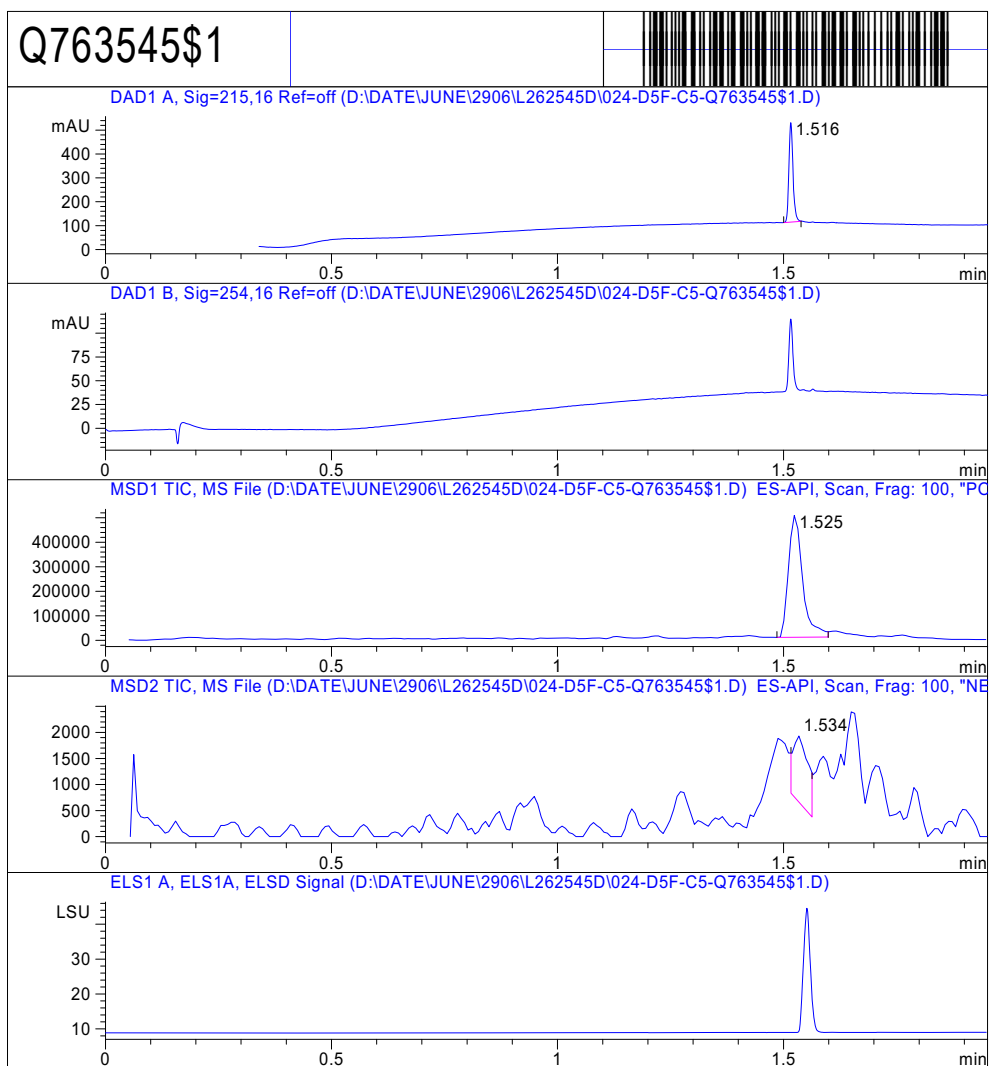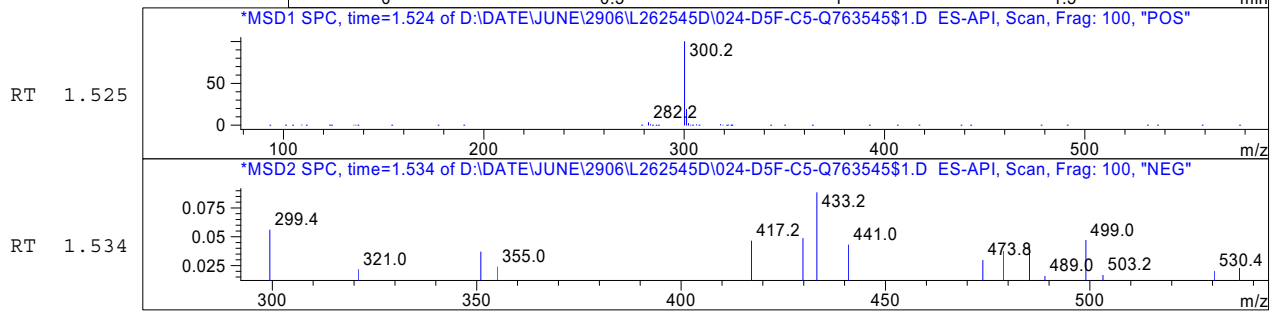

# R2541405

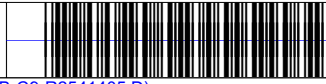

MaxPeak: 90.89%  
Ret\_Time: 1.145 min

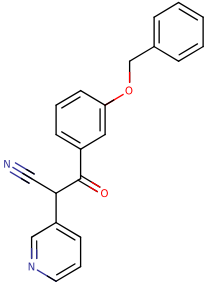

**Mol Wt** 328.36  
**Exact Mass** 328.14

| # | Time  | Area% |
|---|-------|-------|
| 1 | 1.145 | 90.89 |
| 2 | 1.276 | 9.11  |

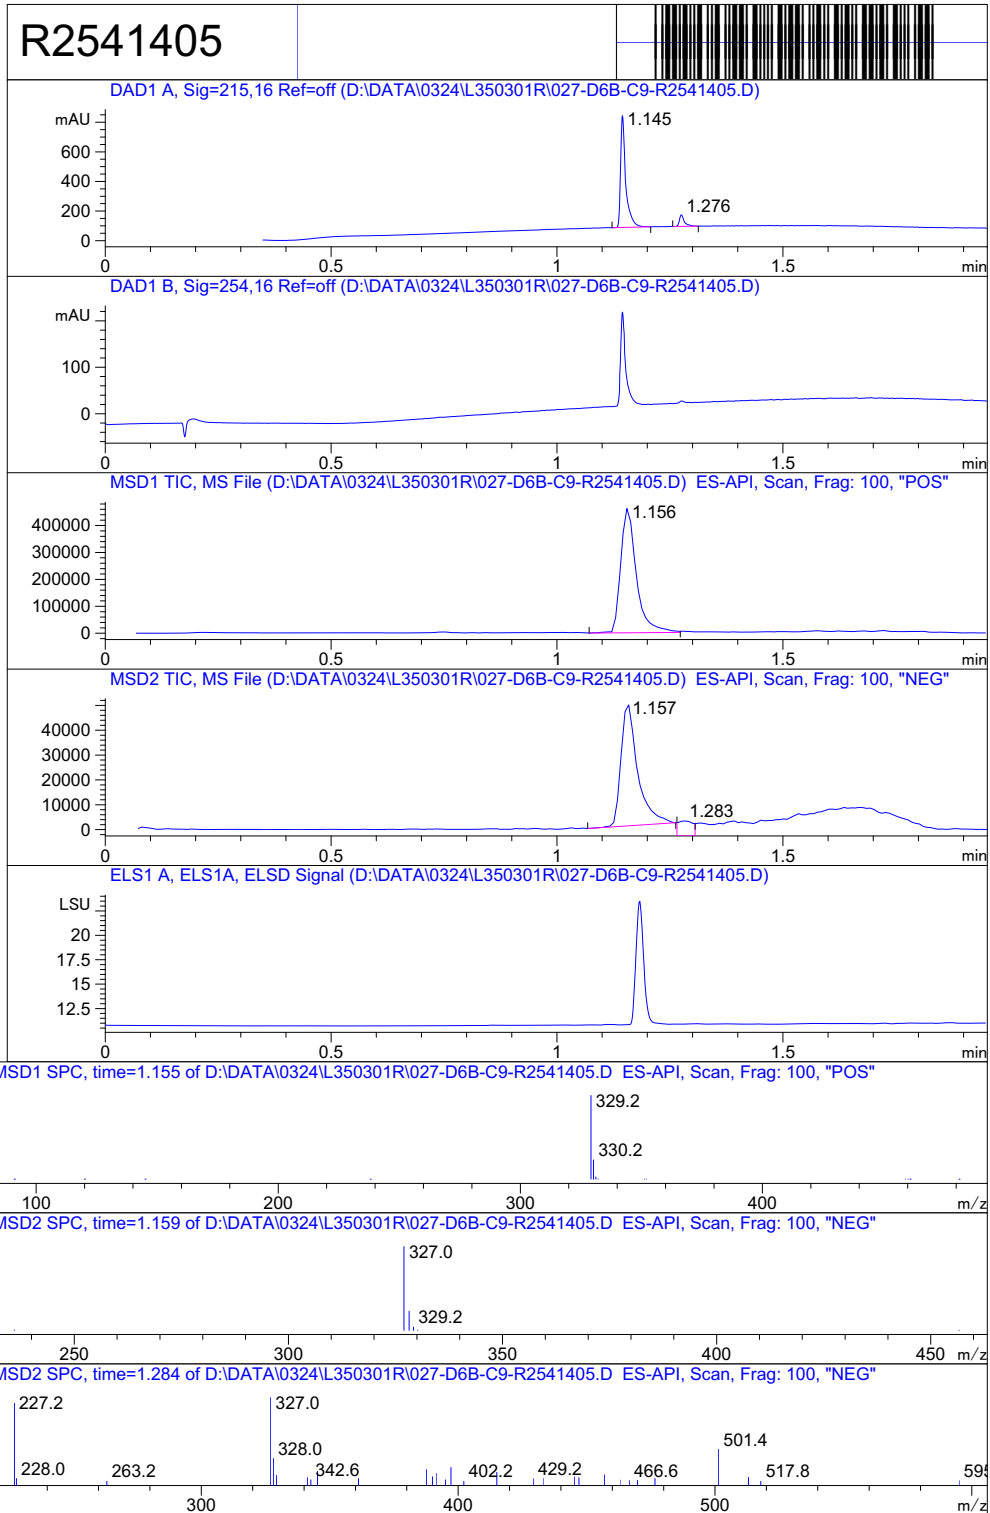

MaxPeak: 100.00%  
Ret\_Time: 0.876 min

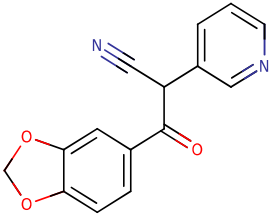

Mol Wt 266.25  
Exact Mass 266.07

| # | Time  | Area%  |
|---|-------|--------|
| 1 | 0.876 | 100.00 |

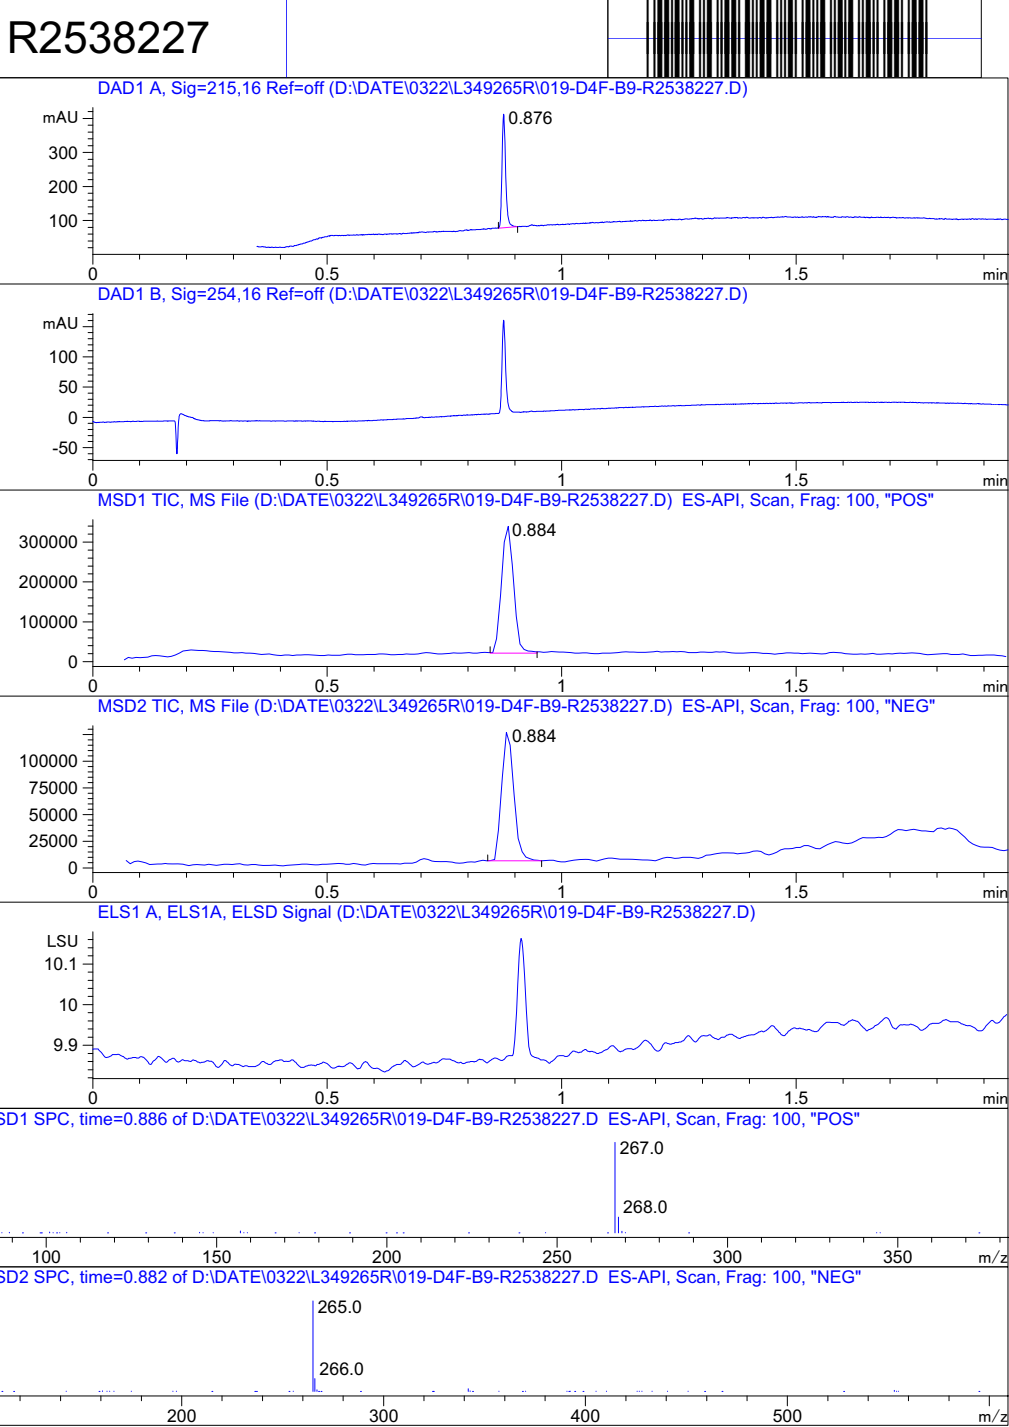

MaxPeak: 100.00%  
Ret\_Time: 0.964 min

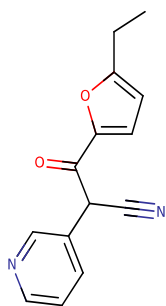

Mol Wt 240.26

Exact Mass 240.1

| # | Time  | Area%  |
|---|-------|--------|
| 1 | 0.964 | 100.00 |

R2532053

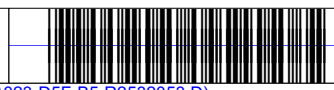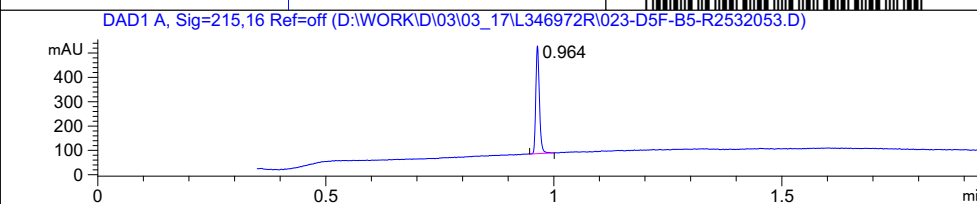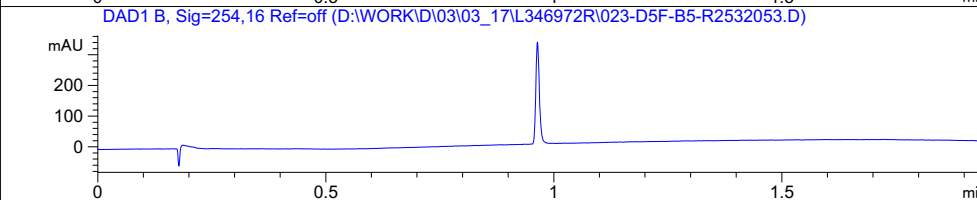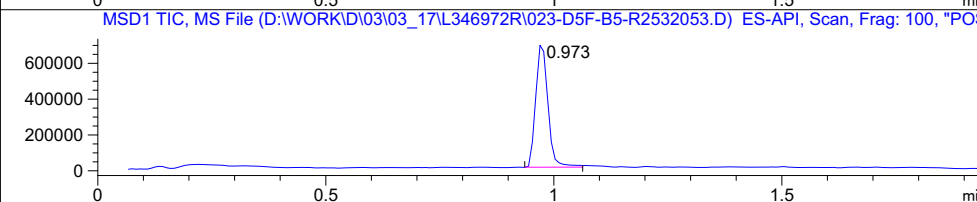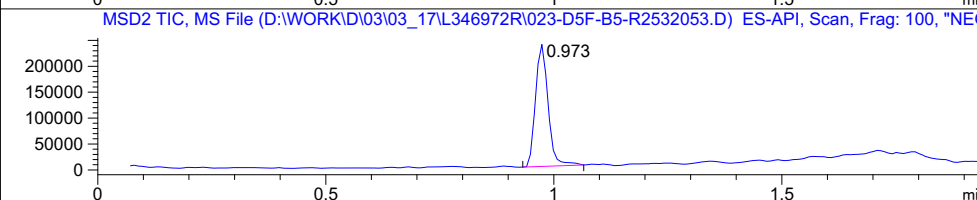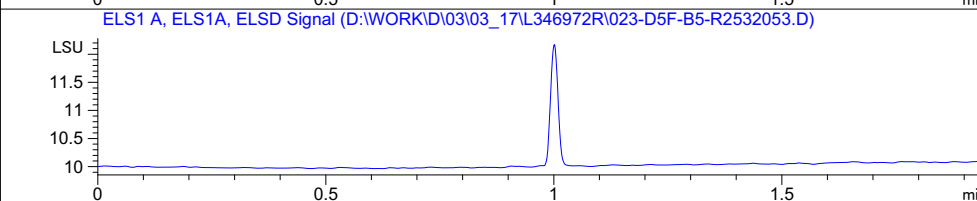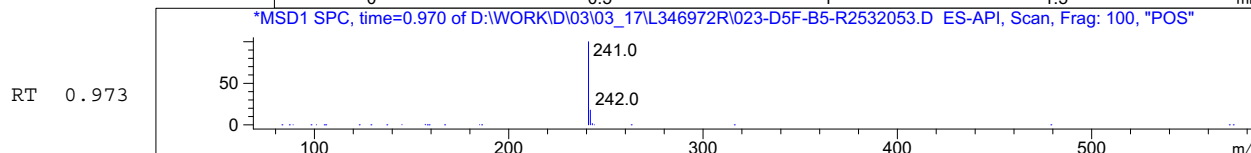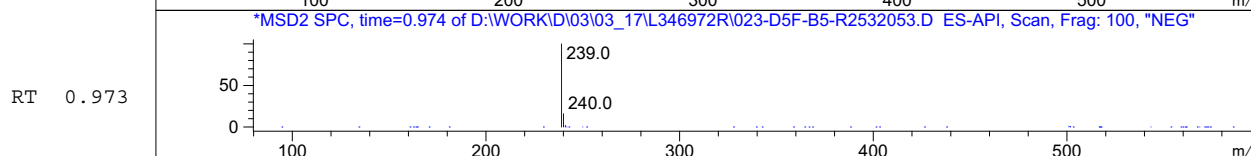

Library Search Report

Data File : C:\MSDCHEM\1\DATA\03\_23\R2539931.D  
Acq On : 24 Mar 2021 4:20 Vial: 16  
Sample : R2539931 Operator:  
Misc : CH3CN+CH2Cl2 Inst : GCMS2 #1  
Sample Amount: 0.00 Multiplr: 1.00

MS Integration Params: autoint1.e  
Method : C:\MSDCHEM\1\METHODS\UNIVERS.M (Chemstation Integrator)  
Title :

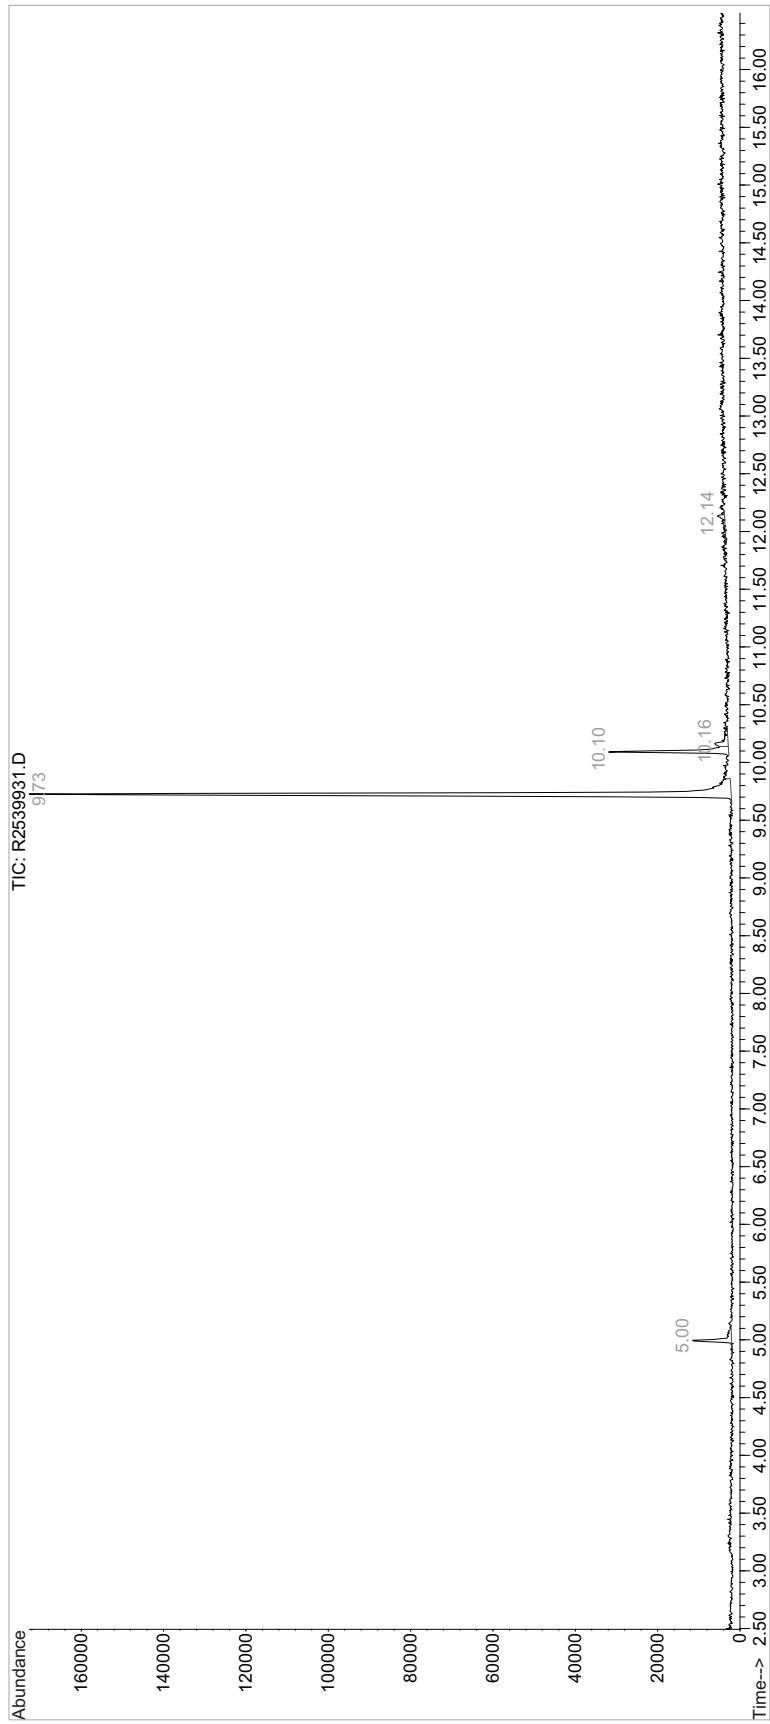

# R2535275

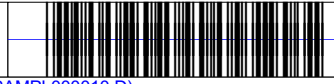

MaxPeak: 100.00%  
Ret\_Time: 0.926 min

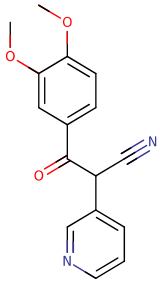

Mol Wt 282.29  
Exact Mass 282.11

| # | Time  | Area%  |
|---|-------|--------|
| 1 | 0.926 | 100.00 |

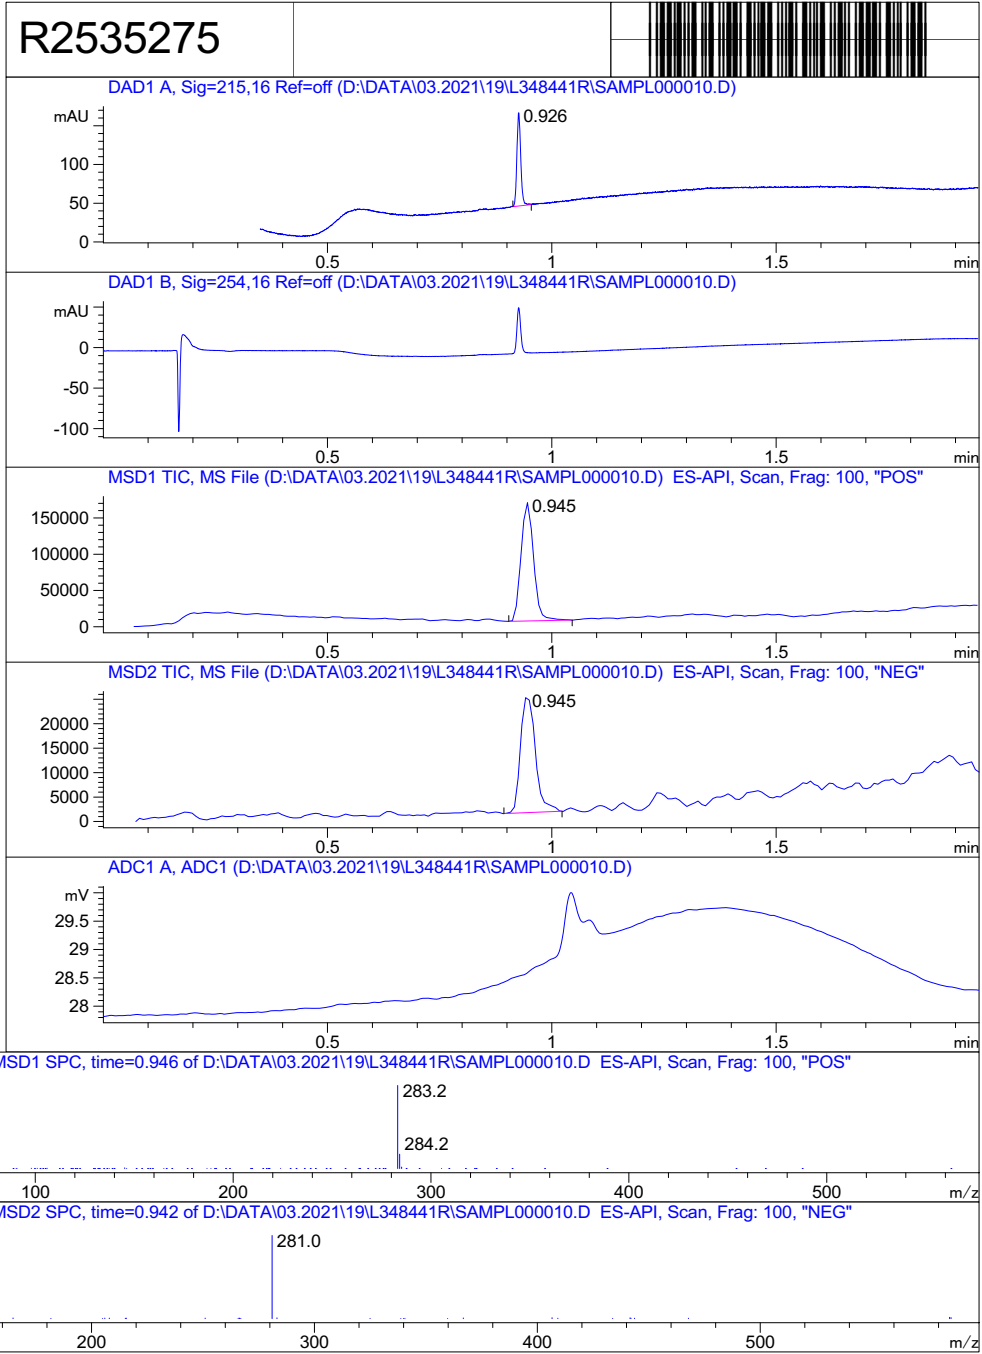

RT 0.945

RT 0.945



MaxPeak: 100.00%  
Ret\_Time: 1.542 min

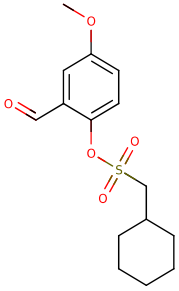

Mol Wt 312.38  
Exact Mass 312.12

| # | Time  | Area%  |
|---|-------|--------|
| 1 | 1.542 | 100.00 |

Q786891\$71

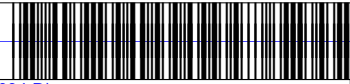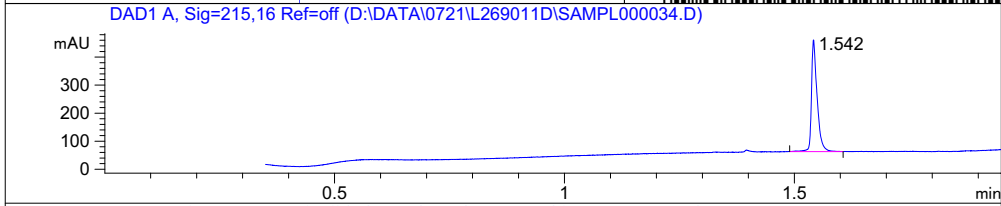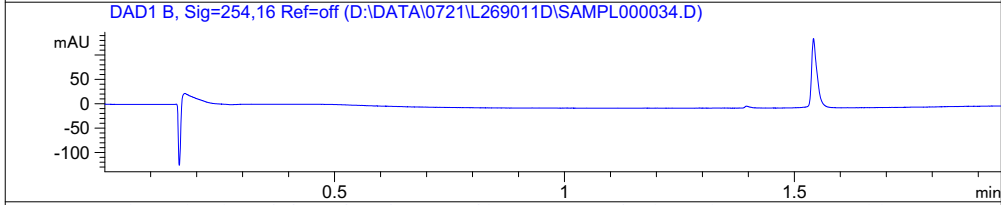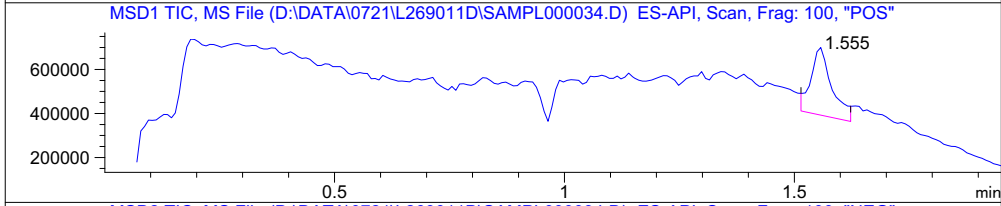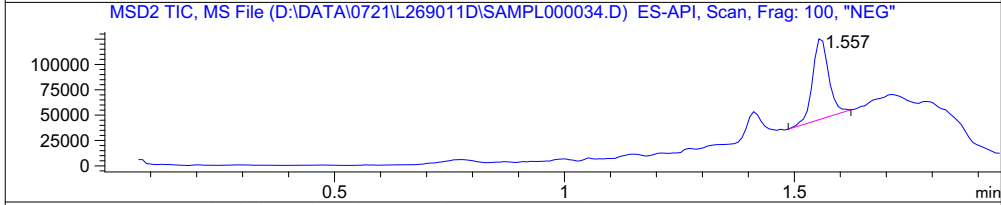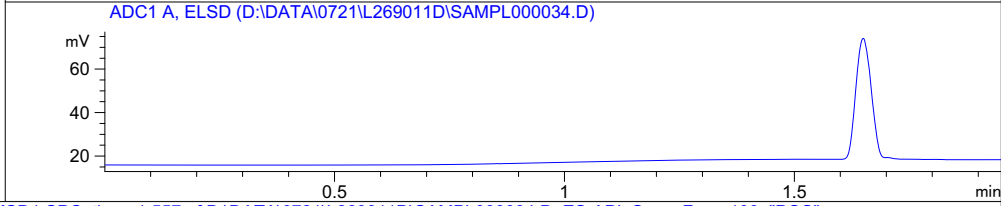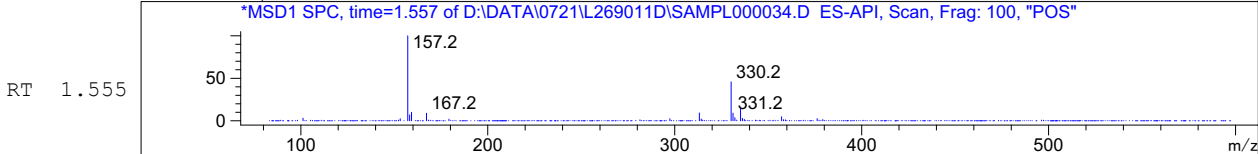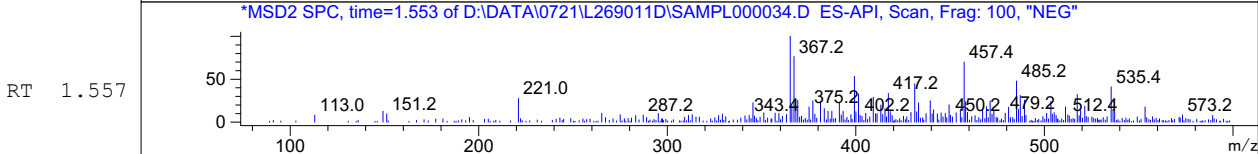

# V498758\$I

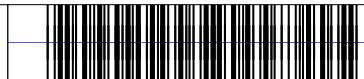

MaxPeak: 97.18%  
Ret\_Time: 1.417 min

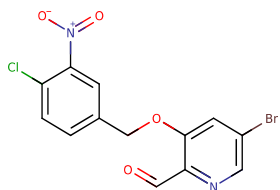

Mol Wt 371.57  
Exact Mass 371.93

| # | Time  | Area% |
|---|-------|-------|
| 1 | 1.417 | 97.18 |
| 2 | 1.463 | 2.82  |

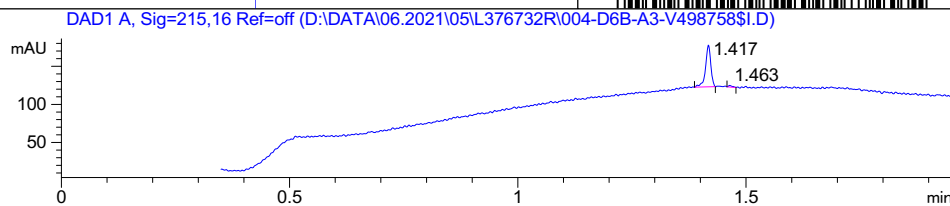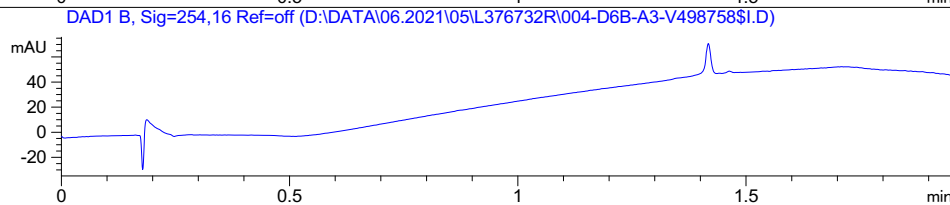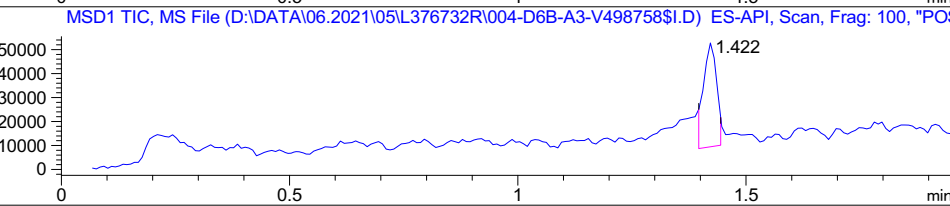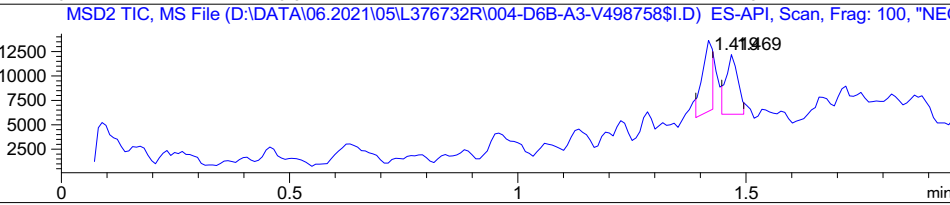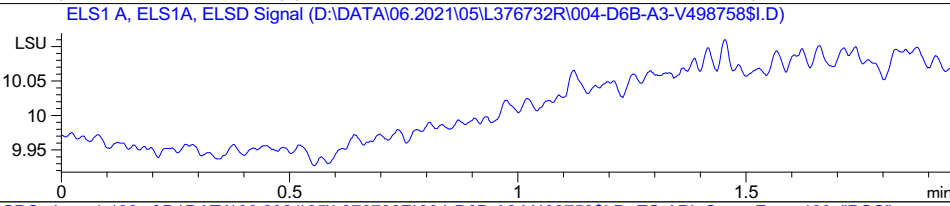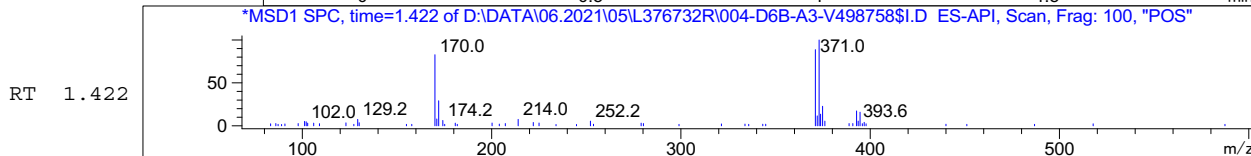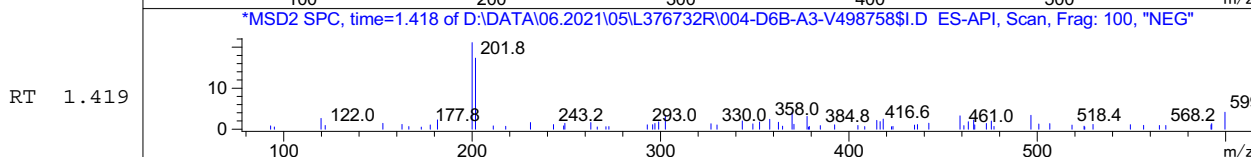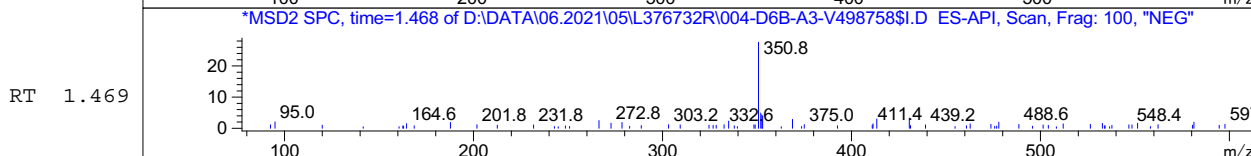

Inj.Date 6/5/2021

CH <invalid> -17-

Acq. Method C:\Chem32\ -> ->

Z4767502618\_

# R2794156

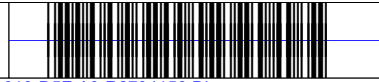

MaxPeak: 100.00%  
Ret\_Time: 1.213 min

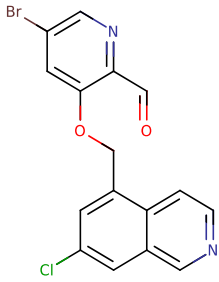

Mol Wt 377.62  
Exact Mass 377.97

| # | Time  | Area%  |
|---|-------|--------|
| 1 | 1.213 | 100.00 |

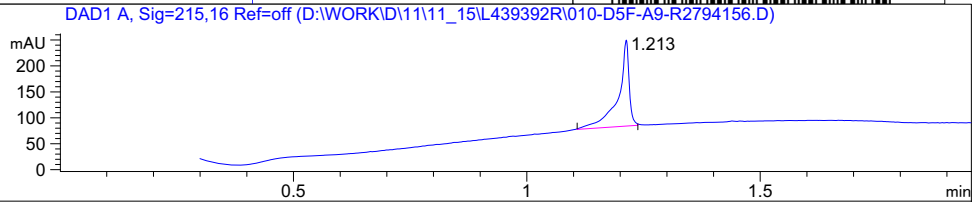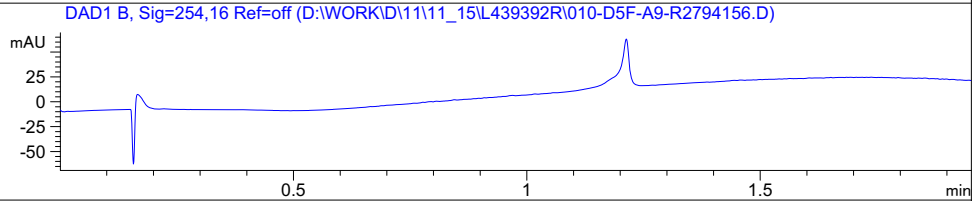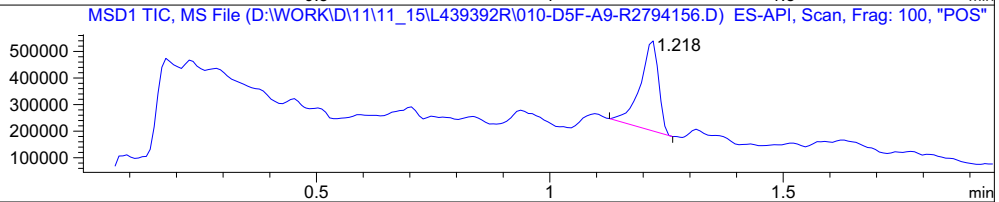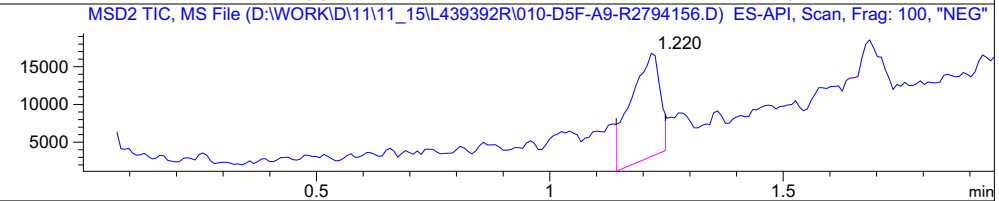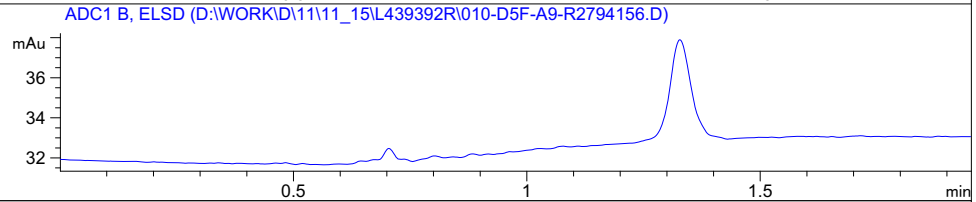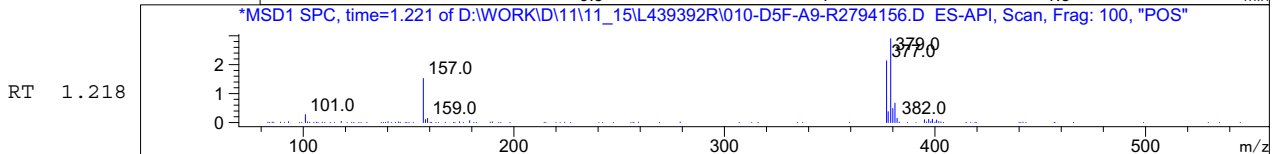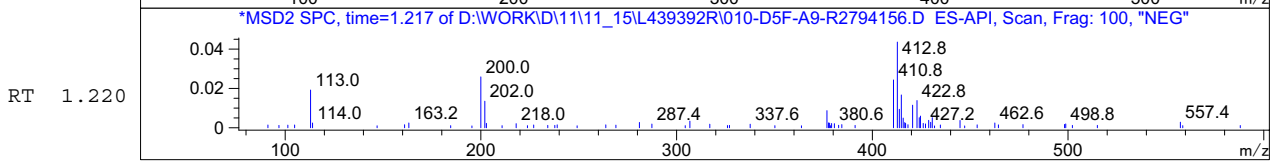

Inj.Date 11/15/2021

K

<invalid> -10-

Acq. Method C:\Chem32\ -> ->

Z5192779138\_

MaxPeak: 100.00%  
Ret\_Time: 1.035 min

Q227942\$1

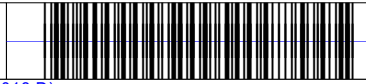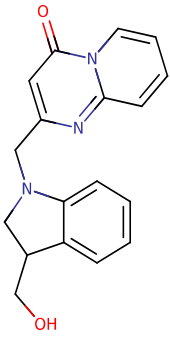

Mol Wt 307.35  
Exact Mass 307.15

| # | Time  | Area%  |
|---|-------|--------|
| 1 | 1.035 | 100.00 |

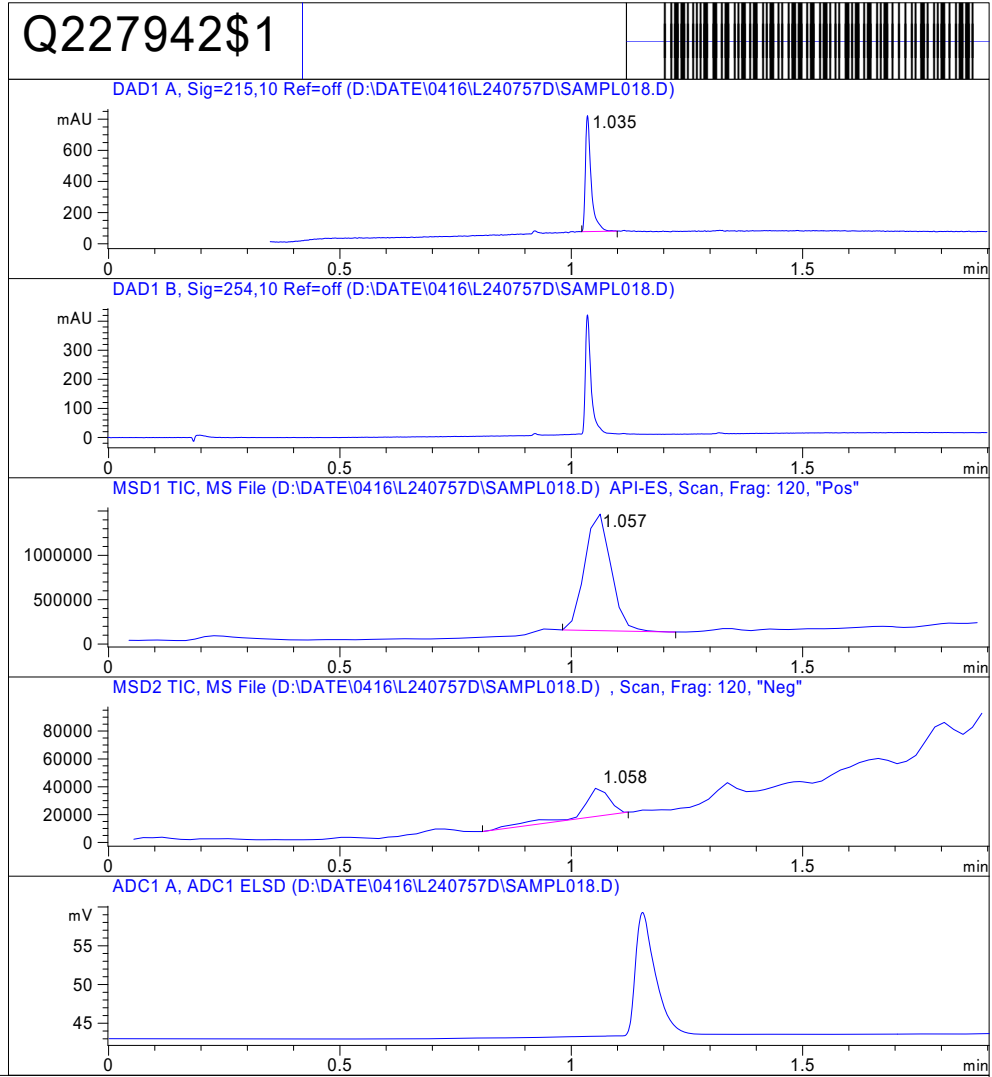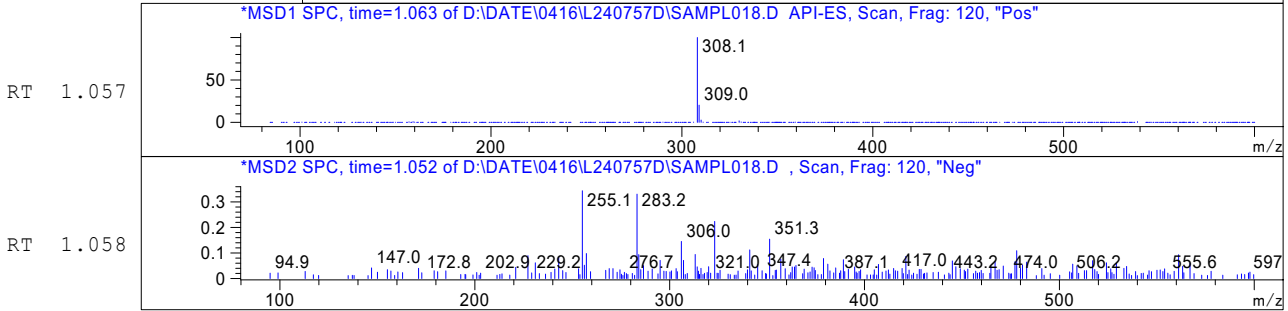

MaxPeak: 100.00%  
Ret\_Time: 1.375 min

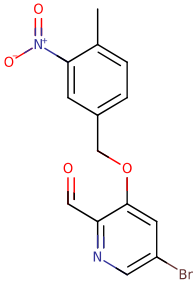

Mol Wt 351.15  
Exact Mass 349.99

| # | Time  | Area%  |
|---|-------|--------|
| 1 | 1.375 | 100.00 |

# U920110\$2

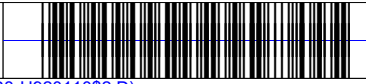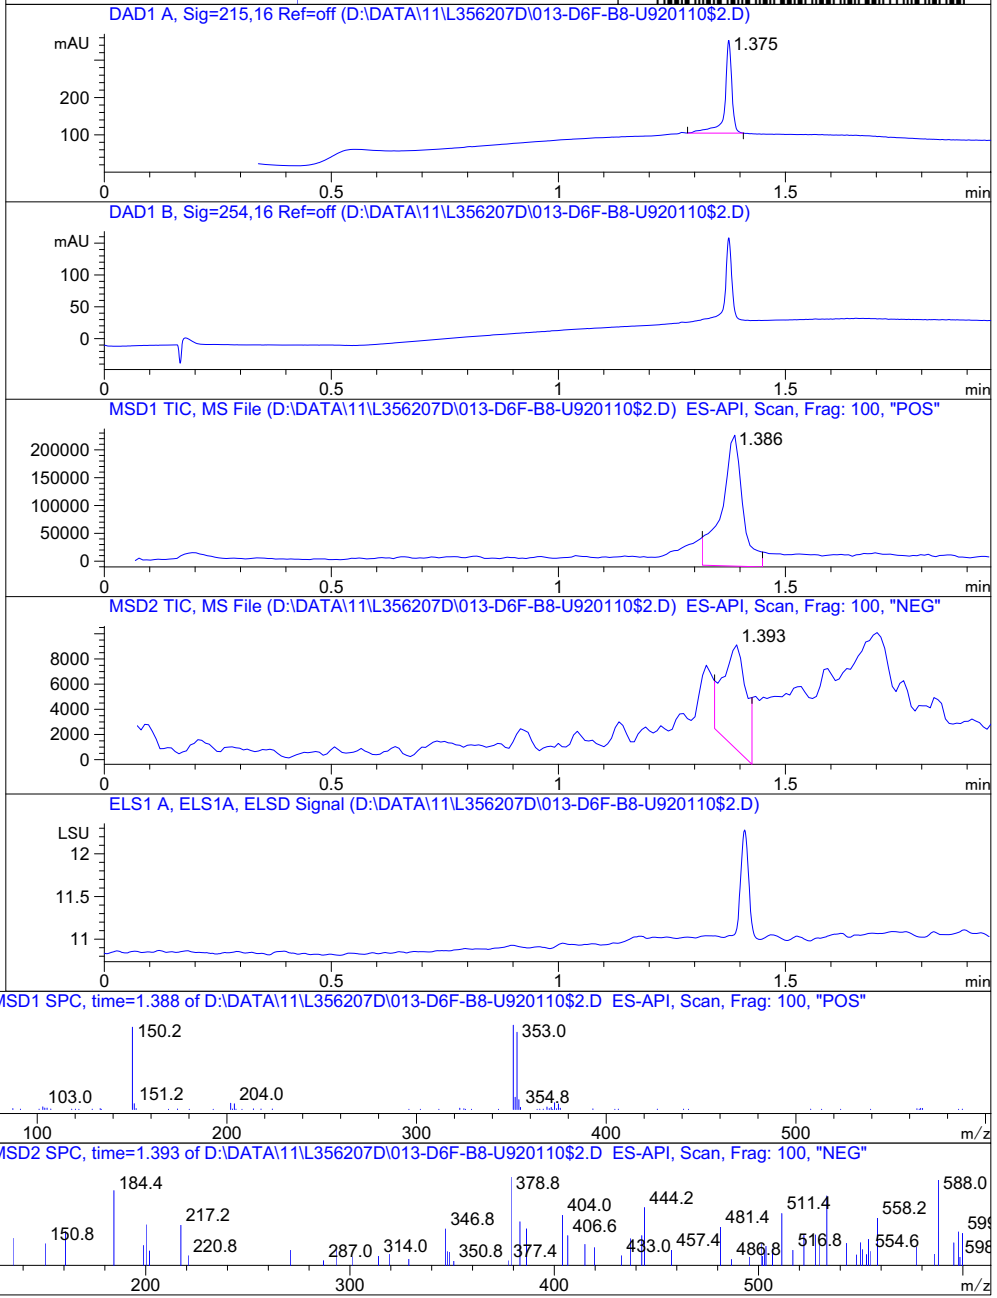

RT 1.386

RT 1.393

MaxPeak: 100.00%  
Ret\_Time: 1.494 min

U920103\$6

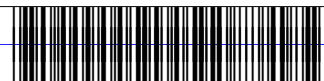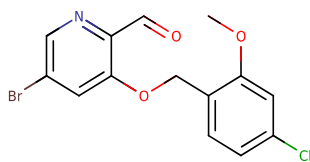

Mol Wt 356.6  
Exact Mass 356.97

| # | Time  | Area%  |
|---|-------|--------|
| 1 | 1.494 | 100.00 |

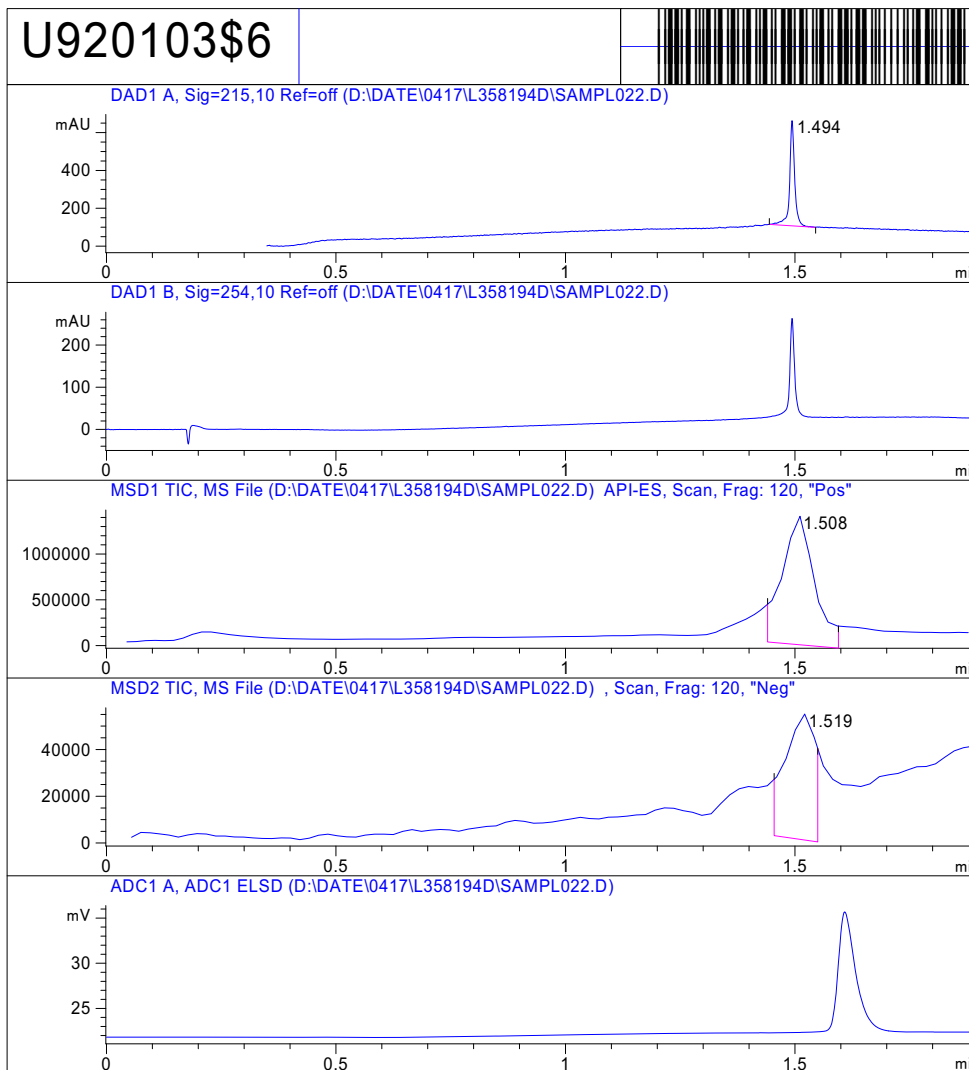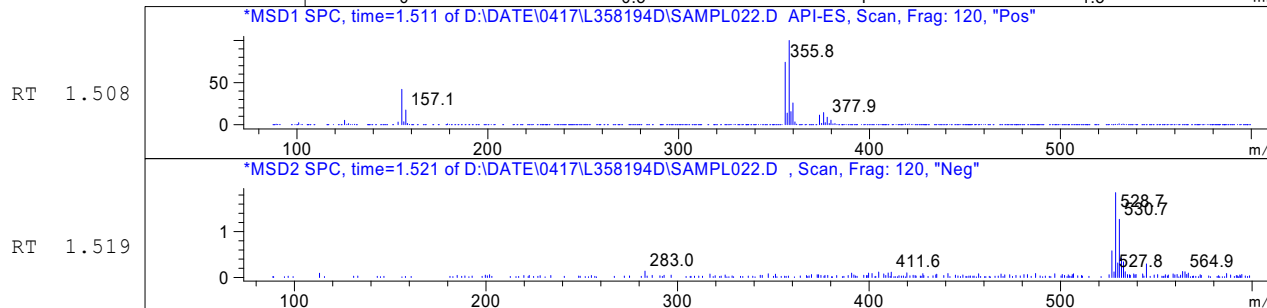

Inj.Date 4/17/2021

E

-VL-

Acq. Method C:\HPCHEM\ -> ->

Z4954569127\_

MaxPeak: 100.00%  
Ret\_Time: 1.415 min

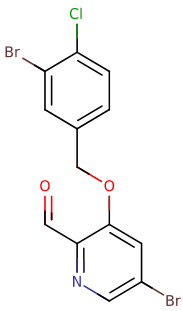

Mol Wt 405.47  
Exact Mass 404.87

| # | Time  | Area%  |
|---|-------|--------|
| 1 | 1.415 | 100.00 |

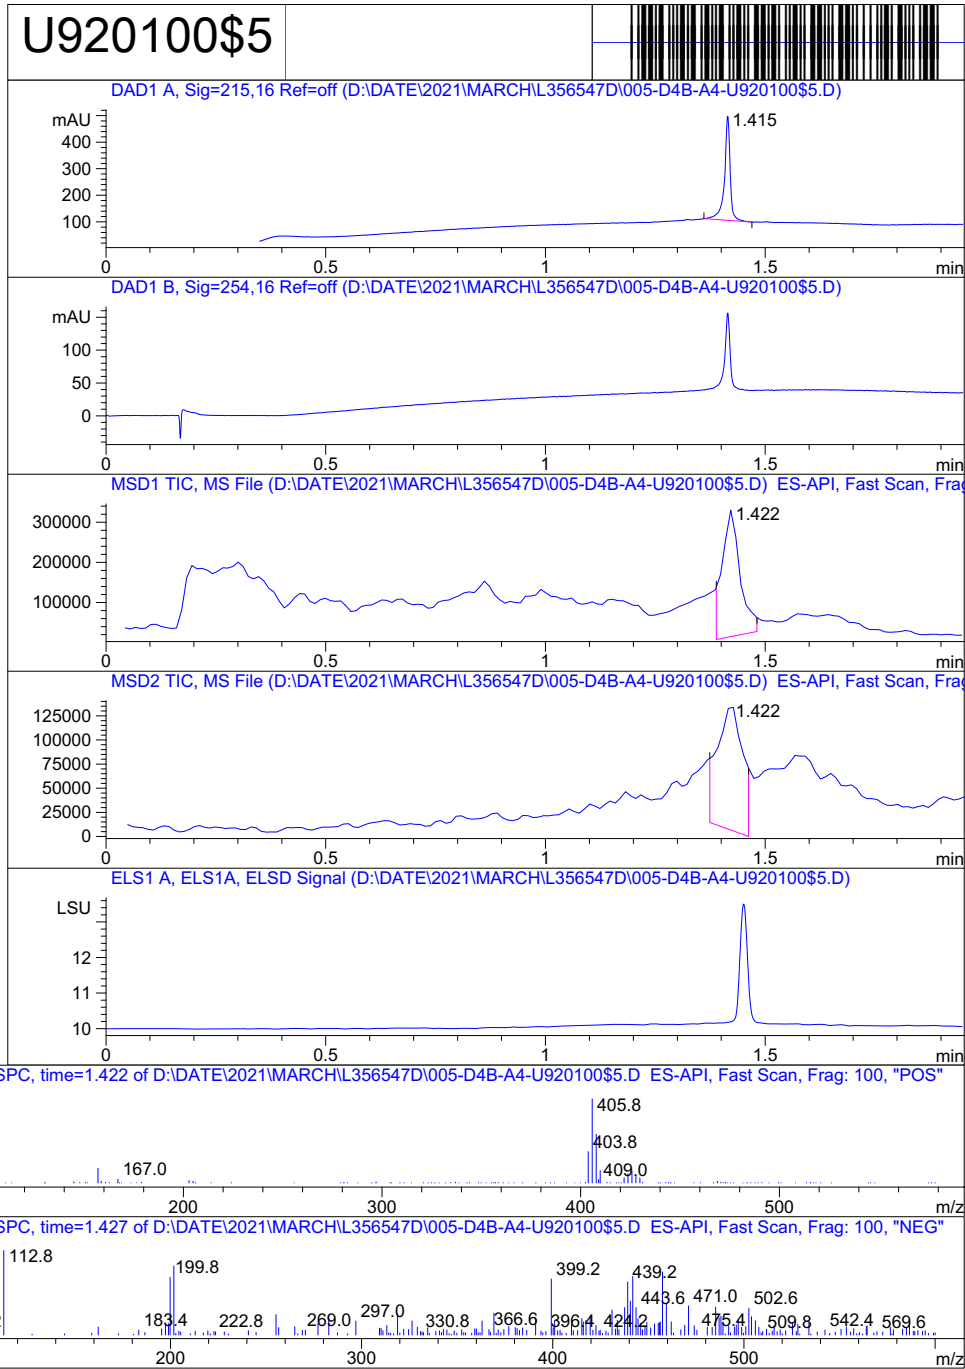

Inj.Date 4/11/2021

T <invalid>

Acq. Method C:\Users\ -> ->

Z4954569121\_

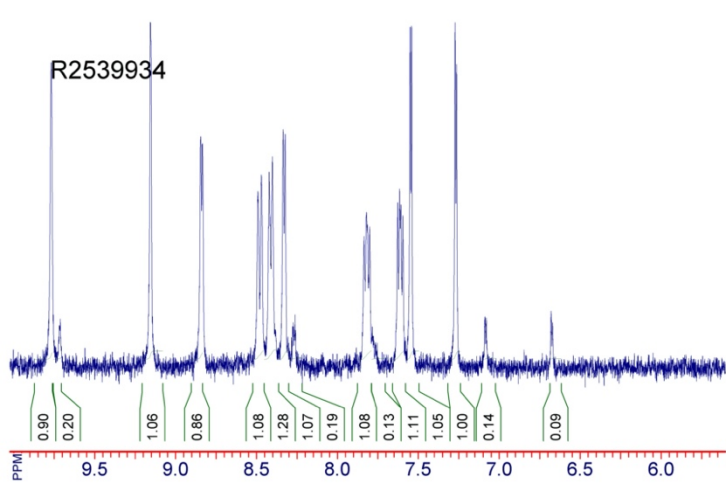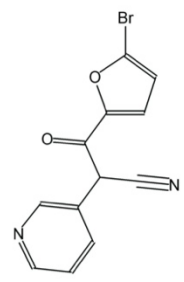

R2539934 C<sub>12</sub>H<sub>7</sub>BrN<sub>2</sub>O<sub>2</sub> 291.10

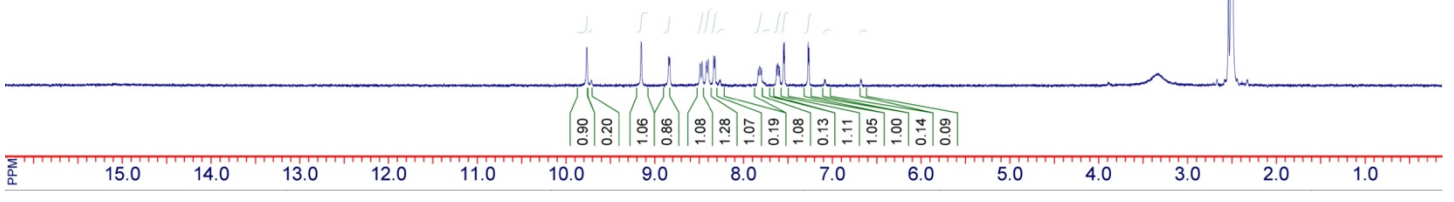

Z1410957817\_



R2539930

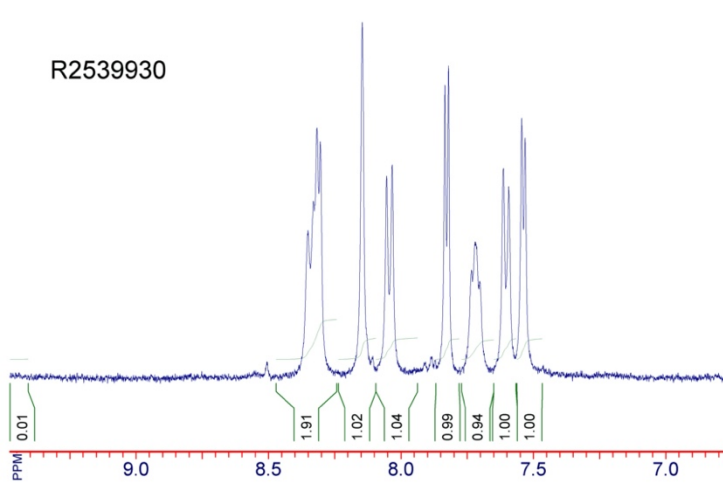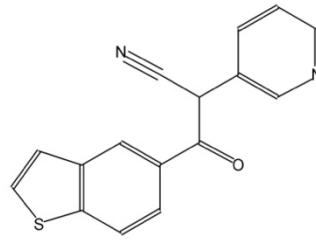

R2539930 C16H10N2OS 278.33

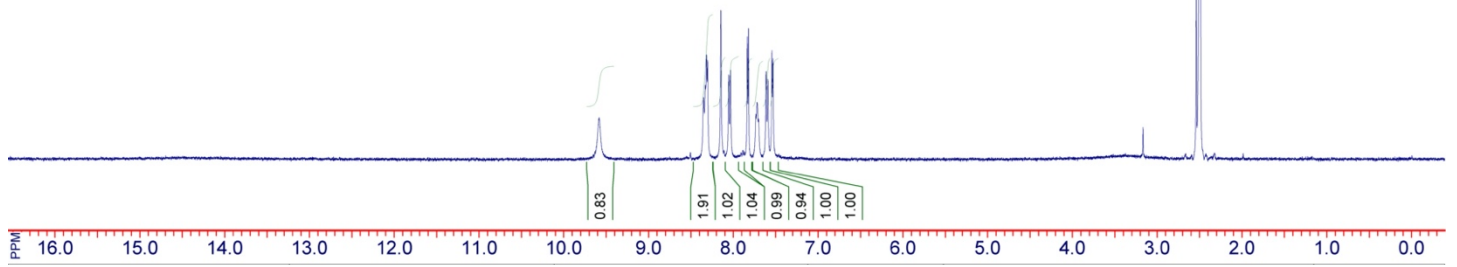

Z3302062818\_
